# Supplementary material for: Hepatic lipid overload triggers biliary epithelial cell activation via E2Fs
Source: eLife. 2023 Mar 6;12:e81926. doi: 10.7554/eLife.81926 (PMC10030116; doi:10.7554/eLife.81926)
Supplement: Supplementary file 1. — Related to Figure 2. [file elife-81926-supp1.xlsx]

## Sheet: Diet_Effect
baseMean	log2FoldChange	lfcSE	stat	pvalue	padj	Contrast	gene_id	gene_name	gene_biotype	gene_source	start	end
7001.61	-0.0176978	0.0919747	-0.192421	0.847413	0.969022	Diet_Effect	ENSMUSG00000000001	Gnai3	protein_coding	ensembl_havana	108107280	108146146
157.044	0.522475	0.269872	1.93601	0.0528659	0.298505	Diet_Effect	ENSMUSG00000000028	Cdc45	protein_coding	ensembl_havana	18780447	18811987
6.16789	-1.14015	1.8263	-0.624297	0.532432		Diet_Effect	ENSMUSG00000000031	H19	lincRNA	ensembl_havana	142575529	142578143
10.5011	3.94659	1.72003	2.29449	0.0217626	0.175424	Diet_Effect	ENSMUSG00000000037	Scml2	protein_coding	ensembl_havana	161082525	161258213
604.928	0.253667	0.1971	1.28699	0.198096	0.585274	Diet_Effect	ENSMUSG00000000049	Apoh	protein_coding	ensembl_havana	108343354	108414396
1404.5	0.15653	0.158746	0.986039	0.324114	0.716683	Diet_Effect	ENSMUSG00000000056	Narf	protein_coding	ensembl_havana	121237253	121255856
7417.28	0.177663	0.0902454	1.96867	0.0489915	0.286717	Diet_Effect	ENSMUSG00000000058	Cav2	protein_coding	ensembl_havana	17281185	17289115
104450	0.1305	0.12673	1.02975	0.303127	0.698347	Diet_Effect	ENSMUSG00000000078	Klf6	protein_coding	ensembl_havana	5861482	5870394
1830.07	-0.229075	0.129398	-1.77032	0.0766745	0.364239	Diet_Effect	ENSMUSG00000000085	Scmh1	protein_coding	ensembl_havana	120405281	120530186
1400.94	-0.202726	0.125489	-1.61549	0.106205	0.431569	Diet_Effect	ENSMUSG00000000088	Cox5a	protein_coding	ensembl_havana	57521274	57532426
16.7264	-2.49469	0.99267	-2.51311	0.0119671	0.120108	Diet_Effect	ENSMUSG00000000093	Tbx2	protein_coding	ensembl_havana	85832551	85841948
16.3223	-4.55678	1.11175	-4.09876	4.15374e-05	0.00176391	Diet_Effect	ENSMUSG00000000094	Tbx4	protein_coding	ensembl_havana	85886422	85916097
19.3442	-0.699167	0.892946	-0.782989	0.433634	0.802096	Diet_Effect	ENSMUSG00000000120	Ngfr	protein_coding	ensembl_havana	95568818	95587735
1.62694	1.74343	3.3389	0.522158	0.60156		Diet_Effect	ENSMUSG00000000125	Wnt3	protein_coding	ensembl_havana	103774150	103817957
226.4	0.286931	0.279466	1.02671	0.304556	0.699824	Diet_Effect	ENSMUSG00000000126	Wnt9a	protein_coding	ensembl_havana	59306928	59333552
1003.89	0.161247	0.16029	1.00597	0.314428	0.708222	Diet_Effect	ENSMUSG00000000127	Fer	protein_coding	ensembl_havana	63863062	64139496
1289.27	-0.175615	0.193211	-0.908929	0.363388	0.752199	Diet_Effect	ENSMUSG00000000131	Xpo6	protein_coding	ensembl_havana	126101715	126200501
4381.37	-0.0987404	0.128015	-0.771321	0.440516	0.807701	Diet_Effect	ENSMUSG00000000134	Tfe3	protein_coding	ensembl_havana	7762560	7775202
12.871	-0.259097	0.849708	-0.304925	0.760423	0.944061	Diet_Effect	ENSMUSG00000000142	Axin2	protein_coding	ensembl_havana	108920349	108950783
986.002	0.211473	0.195496	1.08173	0.279374	0.677729	Diet_Effect	ENSMUSG00000000148	Brat1	protein_coding	ensembl_havana	140705011	140719379
496.538	-0.106395	0.205902	-0.516728	0.605346	0.895363	Diet_Effect	ENSMUSG00000000149	Gna12	protein_coding	ensembl_havana	140758408	140830431
2024.83	0.246324	0.110271	2.23381	0.0254955	0.194697	Diet_Effect	ENSMUSG00000000154	Slc22a18	protein_coding	ensembl_havana	143473736	143499334
66.4343	-0.513792	0.388495	-1.32252	0.185996	0.568207	Diet_Effect	ENSMUSG00000000157	Itgb2l	protein_coding	ensembl_havana	96422288	96443619
1310.74	0.220948	0.143153	1.54344	0.122724	0.466277	Diet_Effect	ENSMUSG00000000159	Igsf5	protein_coding	ensembl_havana	96361668	96422121
252.141	0.347215	0.203669	1.7048	0.0882312	0.393379	Diet_Effect	ENSMUSG00000000167	Pih1d2	protein_coding	ensembl_havana	50617321	50625000
3638.43	0.0433767	0.105722	0.41029	0.681593	0.92063	Diet_Effect	ENSMUSG00000000168	Dlat	protein_coding	ensembl_havana	50634633	50659780
7295.82	-0.108695	0.103697	-1.0482	0.294545	0.691418	Diet_Effect	ENSMUSG00000000171	Sdhd	protein_coding	ensembl_havana	50596357	50603812
20485.3	-0.0157791	0.105983	-0.148884	0.881645	0.978056	Diet_Effect	ENSMUSG00000000184	Ccnd2	protein_coding	ensembl_havana	127125162	127152193
2473.75	0.000526968	0.102152	0.00515866	0.995884	0.999518	Diet_Effect	ENSMUSG00000000194	Gpr107	protein_coding	ensembl_havana	31152316	31218775
9.78699	-2.86893	1.42601	-2.01186	0.0442352	0.271165	Diet_Effect	ENSMUSG00000000197	Nalcn	protein_coding	ensembl_havana	123276634	123627144
25.3968	1.02833	0.692953	1.48398	0.137813	0.492056	Diet_Effect	ENSMUSG00000000202	Btbd17	protein_coding	ensembl_havana	114791217	114795945
20.2148	-1.75891	1.09478	-1.60663	0.108135	0.435445	Diet_Effect	ENSMUSG00000000216	Scnn1g	protein_coding	ensembl_havana	121734479	121768475
6.12811	-2.75434	1.78509	-1.54297	0.122837		Diet_Effect	ENSMUSG00000000223	Drp2	protein_coding	ensembl_havana	134404551	134456573
2.01815	3.14948	2.98174	1.05626	0.290851		Diet_Effect	ENSMUSG00000000244	Tspan32	protein_coding	ensembl_havana	143005046	143019644
5.02996	-1.48047	2.20104	-0.672625	0.501186		Diet_Effect	ENSMUSG00000000248	Clec2g	protein_coding	ensembl_havana	128934381	128984707
10.2508	1.50812	1.12934	1.3354	0.181746	0.562106	Diet_Effect	ENSMUSG00000000253	Gmpr	protein_coding	ensembl_havana	45507444	45553800
2.69885	-0.0522151	2.42256	-0.0215537	0.982804		Diet_Effect	ENSMUSG00000000263	Glra1	protein_coding	ensembl_havana	55514238	55608198
827.109	-0.264392	0.15902	-1.66264	0.0963845	0.410689	Diet_Effect	ENSMUSG00000000266	Mid2	protein_coding	ensembl_havana	140664599	140767715
5289.74	-0.259629	0.0909216	-2.85552	0.00429659	0.0617095	Diet_Effect	ENSMUSG00000000275	Trim25	protein_coding	ensembl_havana	88999376	89020293
293.628	-0.293929	0.249237	-1.17931	0.238273	0.634009	Diet_Effect	ENSMUSG00000000276	Dgke	protein_coding	ensembl_havana	89035179	89066850
6872.64	0.160662	0.108611	1.47924	0.139077	0.494553	Diet_Effect	ENSMUSG00000000278	Scpep1	protein_coding	ensembl_havana	88924020	88955465
552.286	0.0653663	0.186407	0.350665	0.72584	0.936037	Diet_Effect	ENSMUSG00000000282	Mnt	protein_coding	ensembl_havana	74830920	74845725
5.55393	-2.46987	2.33343	-1.05847	0.289839		Diet_Effect	ENSMUSG00000000290	Itgb2	protein_coding	ensembl_havana	77530252	77565708
651.143	0.250742	0.161368	1.55385	0.120219	0.461133	Diet_Effect	ENSMUSG00000000295	Hddc2	protein_coding	ensembl_havana	31313383	31328204
131.91	-0.166471	0.267282	-0.622828	0.533398	0.861287	Diet_Effect	ENSMUSG00000000296	Tpd52l1	protein_coding	ensembl_havana	31332376	31445958
195.494	-0.296209	0.294183	-1.00689	0.31399	0.707495	Diet_Effect	ENSMUSG00000000301	Pemt	protein_coding	ensembl_havana	59970614	60046489
58351.9	-0.118367	0.100723	-1.17517	0.239927	0.636684	Diet_Effect	ENSMUSG00000000303	Cdh1	protein_coding	ensembl_havana	106603351	106670246
89.3628	0.00355132	0.458209	0.00775044	0.993816	0.998919	Diet_Effect	ENSMUSG00000000305	Cdh4	protein_coding	ensembl_havana	179442431	179899373
7483.61	-1.10881	0.457755	-2.42227	0.0154239	0.141683	Diet_Effect	ENSMUSG00000000308	Ckmt1	protein_coding	ensembl_havana	121357714	121363737
28.3846	-1.02501	0.689559	-1.48647	0.137155	0.491035	Diet_Effect	ENSMUSG00000000317	Bcl6b	protein_coding	ensembl_havana	70224128	70229798
737.127	-0.207682	0.174396	-1.19086	0.233707	0.628077	Diet_Effect	ENSMUSG00000000320	Alox12	protein_coding	ensembl_havana	70241457	70255353
2029.75	0.0620883	0.137345	0.452061	0.651225	0.912041	Diet_Effect	ENSMUSG00000000325	Arvcf	protein_coding	ensembl_havana	18348182	18407076
13140.7	0.0287696	0.0952959	0.301898	0.76273	0.944931	Diet_Effect	ENSMUSG00000000326	Comt	protein_coding	ensembl_havana	18406886	18426852
1346.95	0.0514869	0.130925	0.393254	0.694132	0.92499	Diet_Effect	ENSMUSG00000000339	Rtca	protein_coding	ensembl_havana	116488963	116508208
1406.99	-0.145671	0.125216	-1.16335	0.244686	0.640913	Diet_Effect	ENSMUSG00000000340	Dbt	protein_coding	ensembl_havana	116513070	116549981
27478.2	-0.0652086	0.0853336	-0.764162	0.444771	0.810574	Diet_Effect	ENSMUSG00000000346	Dazap2	protein_coding	ensembl_havana	100615349	100620761
1447.51	-0.0114208	0.120141	-0.0950615	0.924266	0.988362	Diet_Effect	ENSMUSG00000000355	Mcts1	protein_coding	ensembl_havana	38600578	38613426
27.1716	-1.2682	0.581069	-2.18253	0.0290708	0.2109	Diet_Effect	ENSMUSG00000000359	Rem1	protein_coding	ensembl_havana	152626951	152635198
11.4372	-1.51249	1.29613	-1.16693	0.24324	0.639124	Diet_Effect	ENSMUSG00000000365	Rnf17	protein_coding	ensembl_havana	56402581	56525032
339.554	0.0436865	0.212659	0.205429	0.837237	0.965597	Diet_Effect	ENSMUSG00000000374	Trappc10	protein_coding	ensembl_havana	78186725	78244641
1265.34	-0.112979	0.151985	-0.743358	0.457265	0.816529	Diet_Effect	ENSMUSG00000000378	Ccm2	protein_coding	ensembl_havana	6546887	6596744
1210.56	0.109874	0.12551	0.875426	0.381342	0.764053	Diet_Effect	ENSMUSG00000000384	Tbrg4	protein_coding	ensembl_havana	6615598	6626067
7816.58	-0.380297	0.152338	-2.4964	0.012546	0.123562	Diet_Effect	ENSMUSG00000000385	Tmprss2	protein_coding	ensembl_havana	97564682	97611195
31.9914	1.0215	0.827151	1.23497	0.216843	0.608728	Diet_Effect	ENSMUSG00000000386	Mx1	polymorphic_pseudogene	ensembl_havana	97447035	97462907
5.12434	-0.906162	1.78452	-0.507791	0.6116		Diet_Effect	ENSMUSG00000000392	Fap	protein_coding	ensembl_havana	62500943	62574075
3932.54	0.0368153	0.109728	0.335514	0.737237	0.938703	Diet_Effect	ENSMUSG00000000399	Ndufa9	protein_coding	ensembl_havana	126821721	126849136
189.364	0.199146	0.23897	0.833351	0.404647	0.781874	Diet_Effect	ENSMUSG00000000402	Egfl6	protein_coding	ensembl_havana	166523007	166585720
247.515	0.164402	0.253325	0.648977	0.516353	0.852677	Diet_Effect	ENSMUSG00000000409	Lck	protein_coding	ensembl_havana	129548344	129573641
23.2622	1.01563	0.696104	1.45902	0.144561	0.502255	Diet_Effect	ENSMUSG00000000411	Tssk3	protein_coding	ensembl_havana	129489014	129491022
3479.58	0.16905	0.112169	1.5071	0.131786	0.481309	Diet_Effect	ENSMUSG00000000416	Cttnbp2	protein_coding	ensembl_havana	18366478	18514843
1134.53	0.138231	0.153937	0.897969	0.369202	0.756005	Diet_Effect	ENSMUSG00000000420	Galnt1	protein_coding	ensembl_havana	24205344	24286818
1162.33	0.0590874	0.13053	0.452673	0.650784	0.912041	Diet_Effect	ENSMUSG00000000439	Mkrn2	protein_coding	ensembl_havana	115601902	115622624
656.221	-0.969083	0.220472	-4.3955	1.10517e-05	0.000613402	Diet_Effect	ENSMUSG00000000440	Pparg	protein_coding	ensembl_havana	115360951	115490399
3231.86	-0.00917505	0.109472	-0.0838121	0.933206	0.989196	Diet_Effect	ENSMUSG00000000441	Raf1	protein_coding	ensembl_havana	115618067	115676635
79.4913	-0.00444831	0.34379	-0.012939	0.989676	0.998919	Diet_Effect	ENSMUSG00000000486	Septin1	protein_coding	ensembl_havana	127214447	127233130
1429.44	-0.571908	0.200404	-2.85378	0.0043203	0.0620017	Diet_Effect	ENSMUSG00000000489	Pdgfb	protein_coding	ensembl_havana	79995874	80014977
580.606	-0.108506	0.160507	-0.67602	0.499028	0.843151	Diet_Effect	ENSMUSG00000000530	Acvrl1	protein_coding	ensembl_havana	101128522	101145336
1600.52	-0.689205	0.604388	-1.14033	0.254147	0.649628	Diet_Effect	ENSMUSG00000000531	Grasp	protein_coding	ensembl_havana	101224188	101232756
747.678	-0.316696	0.154968	-2.04362	0.0409907	0.259477	Diet_Effect	ENSMUSG00000000532	Acvr1b	protein_coding	ensembl_havana	101174067	101213684
3025.29	0.151352	0.131921	1.1473	0.251259	0.647623	Diet_Effect	ENSMUSG00000000538	Tom1l2	protein_coding	ensembl_havana	60226714	60352905
301.055	-2.70066	1.29804	-2.08057	0.0374734	0.245738	Diet_Effect	ENSMUSG00000000544	Gpa33	protein_coding	ensembl_havana	166130238	166166510
80.7469	-0.434163	0.419274	-1.03551	0.30043	0.697074	Diet_Effect	ENSMUSG00000000552	Zfp385a	protein_coding	ensembl_havana	103313895	103340093
6166.92	-0.101753	0.120725	-0.84285	0.399312	0.77872	Diet_Effect	ENSMUSG00000000555	Itga5	protein_coding	ensembl_havana	103344286	103366763
10.2302	0.625515	1.28626	0.486306	0.62675	0.902619	Diet_Effect	ENSMUSG00000000560	Gabra2	protein_coding	ensembl_havana	70957597	71095849
899.046	0.0550791	0.136864	0.402436	0.687363	0.923147	Diet_Effect	ENSMUSG00000000561	Wdr77	protein_coding	ensembl_havana	105959369	105970037
8352.04	0.00208099	0.10468	0.0198795	0.984139	0.998474	Diet_Effect	ENSMUSG00000000563	Atp5pb	protein_coding	ensembl_havana	105942698	105960099
60844.3	-0.0213464	0.105609	-0.202127	0.839817	0.966965	Diet_Effect	ENSMUSG00000000567	Sox9	protein_coding	ensembl_havana	112782224	112787760
1313.67	-0.102582	0.184806	-0.55508	0.57884	0.88128	Diet_Effect	ENSMUSG00000000568	Hnrnpd	protein_coding	ensembl_havana	99955935	99978938
282.221	0.161464	0.187296	0.862081	0.388643	0.770305	Diet_Effect	ENSMUSG00000000579	Dynlt1c	protein_coding	ensembl_havana	6601671	6609774
1650.03	0.181949	0.11268	1.61473	0.106368	0.431884	Diet_Effect	ENSMUSG00000000581	C1d	protein_coding	ensembl_havana	17257579	17269176
6786.17	-0.0300926	0.0936692	-0.321265	0.74801	0.941225	Diet_Effect	ENSMUSG00000000594	Gm2a	protein_coding	ensembl_havana	55098115	55113029
1736.02	-0.093479	0.107002	-0.873623	0.382324	0.764855	Diet_Effect	ENSMUSG00000000600	Krit1	protein_coding	ensembl_havana	3803184	3845564
6264.12	0.0367801	0.0829893	0.443191	0.657628	0.913264	Diet_Effect	ENSMUSG00000000605	Clcn4	protein_coding	ensembl_havana	7282309	7300851
671.6	-1.41855	0.748851	-1.8943	0.0581847	0.313751	Diet_Effect	ENSMUSG00000000628	Hk2	protein_coding	ensembl_havana	82725025	82774454
5777.49	0.0250373	0.125688	0.199202	0.842104	0.967905	Diet_Effect	ENSMUSG00000000631	Myo18a	protein_coding	ensembl_havana	77763246	77865980
3.95565	1.09333	1.81696	0.601736	0.54735		Diet_Effect	ENSMUSG00000000632	Sez6	protein_coding	ensembl_havana	77930800	77979048
4.90778	0.0353209	1.68364	0.0209789	0.983262		Diet_Effect	ENSMUSG00000000673	Haao	protein_coding	ensembl_havana	83831156	83847963
19.5281	-1.47096	0.819657	-1.79461	0.0727163	0.353961	Diet_Effect	ENSMUSG00000000682	Cd52	protein_coding	ensembl_havana	134082448	134095082
3.96163	-2.25857	1.87146	-1.20685	0.227491		Diet_Effect	ENSMUSG00000000686	Abhd15	protein_coding	ensembl_havana	77515121	77538607
237.089	-0.0039591	0.275884	-0.0143506	0.98855	0.998868	Diet_Effect	ENSMUSG00000000693	Loxl3	protein_coding	ensembl_havana	83034173	83052562
1649.49	0.157725	0.155305	1.01558	0.30983	0.70372	Diet_Effect	ENSMUSG00000000708	Kat2b	protein_coding	ensembl_havana	53566861	53672720
6185.88	-0.033582	0.10195	-0.329396	0.741856	0.939508	Diet_Effect	ENSMUSG00000000711	Rab5b	protein_coding	ensembl_havana	128677175	128696264
1.88689	0.273915	2.91477	0.0939747	0.925129		Diet_Effect	ENSMUSG00000000724	Cryba1	protein_coding	ensembl_havana	77718615	77725283
7.08077	-0.538112	1.68491	-0.319372	0.749445	0.94146	Diet_Effect	ENSMUSG00000000731	Aire	protein_coding	ensembl_havana	78030022	78043610
144.249	-0.657804	0.282562	-2.328	0.0199121	0.166555	Diet_Effect	ENSMUSG00000000732	Icosl	protein_coding	ensembl_havana	78069302	78083913
742.706	-0.0631774	0.151345	-0.41744	0.676357	0.919669	Diet_Effect	ENSMUSG00000000738	Spg7	protein_coding	ensembl_havana	123062942	123097760
122.786	0.271874	0.36257	0.749852	0.453344	0.81389	Diet_Effect	ENSMUSG00000000739	Sult5a1	protein_coding	ensembl_havana	123140192	123158315
23691.5	-0.103193	0.100511	-1.02669	0.304567	0.699824	Diet_Effect	ENSMUSG00000000740	Rpl13	protein_coding	ensembl_havana	123102350	123105244
5038.72	0.121622	0.0937398	1.29744	0.194479	0.57975	Diet_Effect	ENSMUSG00000000743	Chmp1a	protein_coding	ensembl_havana	123204264	123212763
2604.12	0.18875	0.106419	1.77365	0.0761204	0.363104	Diet_Effect	ENSMUSG00000000751	Rpa1	protein_coding	ensembl_havana	75298166	75348324
303.096	-2.29125	0.349387	-6.55793	5.45615e-11	1.43629e-08	Diet_Effect	ENSMUSG00000000753	Serpinf1	protein_coding	ensembl_havana	75409769	75422701
1771.58	0.241475	0.10518	2.29583	0.0216857	0.175111	Diet_Effect	ENSMUSG00000000759	Tubgcp3	protein_coding	ensembl_havana	12614277	12672248
1195.31	-0.0924851	0.140474	-0.658378	0.510295	0.849512	Diet_Effect	ENSMUSG00000000776	Polr3d	protein_coding	ensembl_havana	70438757	70443447
40.9966	-0.769357	0.69272	-1.11063	0.266727	0.663737	Diet_Effect	ENSMUSG00000000782	Tcf7	protein_coding	ensembl_havana	52252371	52283331
9692.3	-0.134469	0.118081	-1.13879	0.254791	0.650043	Diet_Effect	ENSMUSG00000000787	Ddx3x	protein_coding	ensembl_havana	13280970	13294052
1.87154	-1.63884	3.21996	-0.508964	0.610777		Diet_Effect	ENSMUSG00000000791	Il12rb1	protein_coding	ensembl_havana	70808449	70821424
55.7154	-1.03141	0.501089	-2.05833	0.0395587	0.254343	Diet_Effect	ENSMUSG00000000792	Slc5a5	protein_coding	ensembl_havana	70882889	70892757
70.2553	-0.237515	0.519262	-0.457409	0.647377	0.910582	Diet_Effect	ENSMUSG00000000794	Kcnn3	protein_coding	ensembl_havana	89520164	89675132
1068.38	-0.109935	0.191527	-0.57399	0.565975	0.875506	Diet_Effect	ENSMUSG00000000804	Usp32	protein_coding	ensembl_havana	84984442	85140161
1150.92	0.521296	0.240696	2.16579	0.0303274	0.216733	Diet_Effect	ENSMUSG00000000805	Car4	protein_coding	ensembl_havana	84957786	84966044
511.085	0.262387	0.1554	1.68846	0.091322	0.400665	Diet_Effect	ENSMUSG00000000811	Txnrd3	protein_coding	ensembl_havana	89643988	89675529
904.429	0.21662	0.14905	1.45334	0.146129	0.504643	Diet_Effect	ENSMUSG00000000823	Zfp512b	protein_coding	ensembl_havana	181582103	181592803
9768.86	-0.277396	0.0988752	-2.80552	0.00502356	0.068216	Diet_Effect	ENSMUSG00000000826	Dnajc5	protein_coding	ensembl_havana	181520485	181555133
8641.78	-0.0160982	0.0938477	-0.171536	0.863803	0.973731	Diet_Effect	ENSMUSG00000000827	Tpd52l2	protein_coding	ensembl_havana	181497142	181517966
1116.29	-0.00110569	0.170577	-0.00648205	0.994828	0.999031	Diet_Effect	ENSMUSG00000000838	Fmr1	protein_coding	ensembl_havana	68678541	68717963
103.809	-1.40661	0.515672	-2.72772	0.00637743	0.0790295	Diet_Effect	ENSMUSG00000000861	Bcl11a	protein_coding	ensembl_havana	24078056	24174123
21.9171	0.555375	0.611614	0.908049	0.363853	0.752344	Diet_Effect	ENSMUSG00000000869	Il4	protein_coding	ensembl_havana	53602982	53618669
2004.18	0.680134	0.110205	6.17152	6.76347e-10	1.25889e-07	Diet_Effect	ENSMUSG00000000876	Pxmp4	protein_coding	ensembl_havana	154585758	154603708
216.539	-0.0670776	0.265312	-0.252825	0.800403	0.956037	Diet_Effect	ENSMUSG00000000881	Dlg3	protein_coding	ensembl_havana	100767722	100818410
345.195	0.351745	0.193226	1.82038	0.0687006	0.343913	Diet_Effect	ENSMUSG00000000884	Gnb1l	protein_coding	ensembl_havana	18498713	18566679
1175.14	0.280783	0.129739	2.1642	0.0304488	0.217137	Diet_Effect	ENSMUSG00000000901	Mmp11	protein_coding	ensembl_havana	75923222	75936496
4314.21	0.279724	0.0944621	2.96123	0.00306411	0.0481712	Diet_Effect	ENSMUSG00000000902	Smarcb1	protein_coding	ensembl_havana	75896769	75921617
60.3694	-1.27201	0.534916	-2.37796	0.0174088	0.153489	Diet_Effect	ENSMUSG00000000903	Vpreb3	protein_coding	ensembl_havana	75943057	75949657
3472.11	-0.23278	0.109715	-2.12167	0.0338652	0.232397	Diet_Effect	ENSMUSG00000000915	Hip1r	protein_coding	ensembl_havana	123973628	124005558
1162.36	-0.0601623	0.141315	-0.425733	0.670303	0.918067	Diet_Effect	ENSMUSG00000000916	Nsun5	protein_coding	ensembl_havana	135369953	135376805
407.055	0.242281	0.214778	1.12805	0.259297	0.655608	Diet_Effect	ENSMUSG00000000934	Top1mt	protein_coding	ensembl_havana	75657035	75678800
1.53682	2.47173	3.07917	0.802725	0.422134		Diet_Effect	ENSMUSG00000000948	Gm38393	protein_coding	havana	59974149	60005064
4606.13	-0.0131898	0.158932	-0.0829906	0.933859	0.98928	Diet_Effect	ENSMUSG00000000957	Mmp14	protein_coding	ensembl_havana	54431612	54445364
1588.91	0.215601	0.13009	1.65733	0.0974531	0.412999	Diet_Effect	ENSMUSG00000000958	Slc7a7	protein_coding	ensembl_havana	54369442	54417780
1732.54	0.0423178	0.109385	0.386872	0.698851	0.926289	Diet_Effect	ENSMUSG00000000959	Oxa1l	protein_coding	ensembl_havana	54360834	54369673
1806.85	0.109973	0.134788	0.8159	0.414557	0.787449	Diet_Effect	ENSMUSG00000000976	Heatr6	protein_coding	ensembl_havana	83753696	83783754
4.54655	-1.15959	2.82855	-0.409961	0.681835		Diet_Effect	ENSMUSG00000000982	Ccl3	protein_coding	ensembl_havana	83647844	83649355
346.53	0.758927	0.339058	2.23834	0.0251988	0.192991	Diet_Effect	ENSMUSG00000000983	Wfdc18	protein_coding	ensembl_havana	83709015	83711348
4342.73	0.157868	0.0883254	1.78735	0.0738812	0.357044	Diet_Effect	ENSMUSG00000001016	Ilf2	protein_coding	ensembl_havana	90476126	90488379
7763.34	-0.0725364	0.0881599	-0.822782	0.410632	0.784893	Diet_Effect	ENSMUSG00000001017	Chtop	protein_coding	ensembl_havana	90498956	90509498
2637.08	0.0828799	0.111573	0.742832	0.457583	0.816529	Diet_Effect	ENSMUSG00000001018	Snapin	protein_coding	ensembl_havana	90488026	90491033
7.42763	-0.585147	1.03845	-0.56348	0.573108	0.879328	Diet_Effect	ENSMUSG00000001021	S100a3	protein_coding	ensembl_havana	90584659	90602702
4515.56	-0.635745	0.121532	-5.23107	1.68529e-07	1.80552e-05	Diet_Effect	ENSMUSG00000001025	S100a6	protein_coding	ensembl_havana	90612882	90624181
58.8631	-0.588717	0.399899	-1.47216	0.140977	0.497512	Diet_Effect	ENSMUSG00000001029	Icam2	protein_coding	ensembl_havana	106377656	106388075
1018.87	0.119477	0.139074	0.859092	0.39029	0.771752	Diet_Effect	ENSMUSG00000001034	Mapk7	protein_coding	ensembl_havana	61488812	61494406
1287.4	0.0344105	0.159437	0.215825	0.829124	0.9635	Diet_Effect	ENSMUSG00000001036	Epn2	protein_coding	ensembl_havana	61517249	61579687
1248.18	0.359319	0.149397	2.40514	0.0161665	0.146101	Diet_Effect	ENSMUSG00000001039	B9d1	protein_coding	ensembl_havana	61505144	61512931
3106.26	-0.195679	0.0909036	-2.1526	0.0313505	0.221714	Diet_Effect	ENSMUSG00000001052	Sec24b	protein_coding	ensembl_havana	129982759	130061553
2583.19	-0.0595433	0.121128	-0.491573	0.623021	0.90128	Diet_Effect	ENSMUSG00000001053	N4bp3	protein_coding	ensembl_havana	51643063	51650842
3108.16	0.0836835	0.110539	0.757048	0.449021	0.812092	Diet_Effect	ENSMUSG00000001054	Rmnd5b	protein_coding	ensembl_havana	51623671	51635896
1866.61	-0.0300338	0.115353	-0.260365	0.794582	0.955256	Diet_Effect	ENSMUSG00000001056	Nhp2	protein_coding	ensembl_havana	51619735	51623714
638.325	0.163723	0.169704	0.964757	0.334667	0.726186	Diet_Effect	ENSMUSG00000001062	Vps9d1	protein_coding	ensembl_havana	123242356	123254348
635.408	0.150585	0.162886	0.924484	0.355235	0.746621	Diet_Effect	ENSMUSG00000001065	Zfp276	protein_coding	ensembl_havana	123254195	123269745
1.56684	-2.22526	3.35864	-0.662548	0.50762		Diet_Effect	ENSMUSG00000001076	C1ql4	protein_coding	ensembl_havana	99084086	99087817
3114.22	0.177007	0.105446	1.67865	0.0932204	0.403612	Diet_Effect	ENSMUSG00000001082	Mfsd10	protein_coding	ensembl_havana	34633642	34637212
4229.67	-0.289492	0.104141	-2.77981	0.005439	0.0720004	Diet_Effect	ENSMUSG00000001089	Luzp1	protein_coding	ensembl_havana	136469761	136554780
117.921	-0.794974	0.338747	-2.34681	0.0189349	0.161161	Diet_Effect	ENSMUSG00000001095	Slc13a2	protein_coding	ensembl_havana	78397087	78422217
2766.74	-0.123425	0.147181	-0.838592	0.401698	0.779907	Diet_Effect	ENSMUSG00000001098	Kctd10	protein_coding	ensembl_havana	114363567	114380508
3514.08	0.154748	0.0947938	1.63247	0.102581	0.424112	Diet_Effect	ENSMUSG00000001100	Poldip2	protein_coding	ensembl_havana	78512193	78522736
5.28591	1.40066	1.60794	0.871092	0.383704		Diet_Effect	ENSMUSG00000001103	Sebox	protein_coding	ensembl_havana	78503447	78505081
1672.19	-0.106005	0.108742	-0.97483	0.329644	0.722278	Diet_Effect	ENSMUSG00000001105	Ift20	protein_coding	ensembl_havana	78536361	78541737
495.474	-2.62997	0.299803	-8.77233	1.75009e-18	1.69731e-15	Diet_Effect	ENSMUSG00000001119	Col6a1	protein_coding	ensembl_havana	76708792	76726168
941.853	0.154919	0.165582	0.935602	0.349478	0.740831	Diet_Effect	ENSMUSG00000001120	Pcbp3	protein_coding	ensembl_havana	76761857	76961887
11257.1	-0.0757622	0.0908833	-0.833621	0.404495	0.781874	Diet_Effect	ENSMUSG00000001123	Lgals9	protein_coding	ensembl_havana	78962974	78984946
4912.75	0.0161165	0.109619	0.147023	0.883114	0.978515	Diet_Effect	ENSMUSG00000001127	Araf	protein_coding	ensembl_havana	20797814	20860519
104.307	-0.41656	0.342615	-1.21583	0.224051	0.618053	Diet_Effect	ENSMUSG00000001128	Cfp	protein_coding	ensembl_havana	20925454	20931555
95.4815	-0.159608	0.362705	-0.440049	0.659902	0.914217	Diet_Effect	ENSMUSG00000001131	Timp1	protein_coding	ensembl_havana	20870166	20874735
373.081	-0.0122111	0.173647	-0.0703215	0.943938	0.990816	Diet_Effect	ENSMUSG00000001134	Uxt	protein_coding	ensembl_havana	20941722	20962017
482.923	0.0688181	0.203812	0.337654	0.735624	0.938242	Diet_Effect	ENSMUSG00000001138	Cnnm3	protein_coding	ensembl_havana	36511867	36528237
2788.94	0.136898	0.126692	1.08056	0.279894	0.677855	Diet_Effect	ENSMUSG00000001143	Lman2l	protein_coding	ensembl_havana	36419871	36445271
961.963	0.222211	0.133261	1.66749	0.0954166	0.40804	Diet_Effect	ENSMUSG00000001150	Mcm3ap	protein_coding	ensembl_havana	76468927	76515857
956.656	0.131743	0.165287	0.797058	0.425417	0.796501	Diet_Effect	ENSMUSG00000001151	Pcnt	protein_coding	ensembl_havana	76351263	76442786
5.7843	0.854485	1.51955	0.562328	0.573892		Diet_Effect	ENSMUSG00000001155	Ftcd	protein_coding	ensembl_havana	76575648	76590338
6463.47	-0.311756	0.127241	-2.45012	0.014281	0.134378	Diet_Effect	ENSMUSG00000001156	Mxd1	protein_coding	ensembl_havana	86647042	86669161
693.546	0.0833951	0.202252	0.412332	0.680096	0.920076	Diet_Effect	ENSMUSG00000001157	Gmcl1	protein_coding	ensembl_havana	86691768	86733383
1836.77	-0.0201546	0.112455	-0.179225	0.857761	0.972136	Diet_Effect	ENSMUSG00000001158	Snrnp27	protein_coding	ensembl_havana	86675151	86684522
170.589	0.180367	0.282012	0.639571	0.522452	0.855146	Diet_Effect	ENSMUSG00000001166	Oas1c	protein_coding	ensembl_havana	120800194	120812514
878.581	0.0513478	0.142118	0.361304	0.717872	0.933193	Diet_Effect	ENSMUSG00000001173	Ocrl	protein_coding	ensembl_havana	47912387	47965868
27214.9	-0.120104	0.0905406	-1.32652	0.184667	0.566533	Diet_Effect	ENSMUSG00000001175	Calm1	protein_coding	ensembl_havana	100199435	100209814
2060.93	0.674724	0.132895	5.07713	3.83182e-07	3.62097e-05	Diet_Effect	ENSMUSG00000001211	Agpat3	protein_coding	ensembl_havana	78269178	78352489
495.182	-2.2654	1.4564	-1.55548	0.119832	0.460704	Diet_Effect	ENSMUSG00000001225	Slc26a3	protein_coding	ensembl_havana	31390871	31473917
49.4502	0.043621	0.560875	0.077773	0.938009	0.989846	Diet_Effect	ENSMUSG00000001227	Sema6b	protein_coding	ensembl_havana	56123085	56140343
363.314	1.36634	0.203468	6.71524	1.87758e-11	5.67183e-09	Diet_Effect	ENSMUSG00000001228	Uhrf1	protein_coding	ensembl_havana	56303321	56323486
2040.38	0.215529	0.124572	1.73015	0.0836034	0.382178	Diet_Effect	ENSMUSG00000001229	Dpp9	protein_coding	ensembl_havana	56186807	56218905
58.5586	-0.752327	0.425242	-1.76917	0.0768651	0.364674	Diet_Effect	ENSMUSG00000001240	Ramp2	protein_coding	ensembl_havana	101246028	101259546
6015.38	0.00126783	0.0852859	0.0148657	0.988139	0.998868	Diet_Effect	ENSMUSG00000001247	Lsr	protein_coding	ensembl_havana	30957770	30973464
2379.64	-0.217333	0.187897	-1.15666	0.24741	0.644568	Diet_Effect	ENSMUSG00000001248	Gramd1a	protein_coding	ensembl_havana	31130127	31155896
14944.1	0.0464392	0.0861869	0.53882	0.590011	0.886665	Diet_Effect	ENSMUSG00000001249	Hpn	protein_coding	ensembl_havana	31098725	31115290
0.862462	0.50764	3.36491	0.150863	0.880084		Diet_Effect	ENSMUSG00000001260	Gabrg1	protein_coding	ensembl_havana	70751047	70842617
4743.2	0.732276	0.115251	6.35376	2.10121e-10	4.55518e-08	Diet_Effect	ENSMUSG00000001270	Ckb	protein_coding	ensembl_havana	111669361	111672338
2166.03	-0.106708	0.120089	-0.888573	0.374233	0.759187	Diet_Effect	ENSMUSG00000001280	Sp1	protein_coding	ensembl_havana	102406143	102436404
22.7979	1.69505	0.779064	2.17576	0.0295735	0.213545	Diet_Effect	ENSMUSG00000001281	Itgb7	protein_coding	ensembl_havana	102215995	102231944
2035.61	0.0318247	0.106776	0.298052	0.765664	0.945382	Diet_Effect	ENSMUSG00000001285	Myg1	protein_coding	ensembl_havana	102331709	102338139
4186.81	0.0703223	0.0935393	0.751795	0.452175	0.813167	Diet_Effect	ENSMUSG00000001288	Rarg	protein_coding	ensembl_havana	102234938	102257517
5186.33	-0.060934	0.110337	-0.552255	0.580773	0.88225	Diet_Effect	ENSMUSG00000001289	Pfdn5	protein_coding	ensembl_havana	102326116	102331873
1260.91	-0.205632	0.196973	-1.04396	0.296506	0.692662	Diet_Effect	ENSMUSG00000001300	Efnb2	protein_coding	ensembl_havana	8617434	8661242
1370.25	0.0455829	0.109406	0.416639	0.676942	0.919796	Diet_Effect	ENSMUSG00000001305	Rrp15	protein_coding	ensembl_havana	186720978	186749358
202.984	-0.24353	0.251455	-0.968484	0.332803	0.724461	Diet_Effect	ENSMUSG00000001313	Rnd2	protein_coding	ensembl_havana	101464999	101471853
811.465	0.127187	0.157558	0.807244	0.419526	0.791827	Diet_Effect	ENSMUSG00000001323	Srr	protein_coding	ensembl_havana	74906359	74925948
44.8412	-0.499173	0.558945	-0.893064	0.371823	0.756914	Diet_Effect	ENSMUSG00000001333	Sync	protein_coding	ensembl_havana	129287617	129308559
30.8112	-0.906524	0.624262	-1.45215	0.146459	0.505299	Diet_Effect	ENSMUSG00000001334	Fndc5	protein_coding	ensembl_havana	129136999	129144593
187.322	-0.498843	0.265816	-1.87665	0.0605666	0.321724	Diet_Effect	ENSMUSG00000001348	Acp5	protein_coding	ensembl_havana	22126727	22135711
166.965	0.00931973	0.408907	0.0227918	0.981816	0.998374	Diet_Effect	ENSMUSG00000001349	Cnn1	protein_coding	ensembl_havana	22099216	22109630
2837.16	0.145564	0.11597	1.25518	0.209413	0.5979	Diet_Effect	ENSMUSG00000001366	Fbxo9	protein_coding	ensembl_havana	78081499	78109065
1546.88	0.168886	0.152519	1.10731	0.268159	0.665084	Diet_Effect	ENSMUSG00000001376	Vps50	protein_coding	ensembl_havana	3498382	3603531
3115.33	-0.0158719	0.0964812	-0.164508	0.869331	0.976103	Diet_Effect	ENSMUSG00000001380	Hars	protein_coding	ensembl_havana	36766528	36783205
3308.02	0.098527	0.107838	0.913661	0.360895	0.751264	Diet_Effect	ENSMUSG00000001383	Zmat2	protein_coding	ensembl_havana	36793876	36799666
101.672	2.09396	0.379906	5.51179	3.55213e-08	4.30625e-06	Diet_Effect	ENSMUSG00000001403	Ube2c	protein_coding	ensembl_havana	164769898	164778822
2183.34	-0.0493276	0.135478	-0.364101	0.715782	0.932844	Diet_Effect	ENSMUSG00000001415	Smg5	protein_coding	ensembl_havana	88336260	88362338
12425.8	-0.0347527	0.0912572	-0.380821	0.703336	0.927198	Diet_Effect	ENSMUSG00000001416	Cct3	protein_coding	ensembl_havana	88297116	88321767
7601.51	-0.019997	0.0965309	-0.207157	0.835887	0.965104	Diet_Effect	ENSMUSG00000001418	Glmp	protein_coding	ensembl_havana	88325023	88331313
3152.07	-0.228319	0.176091	-1.29659	0.194771	0.579813	Diet_Effect	ENSMUSG00000001419	Mef2d	protein_coding	ensembl_havana	88142372	88172086
590.7	0.222048	0.152203	1.4589	0.144593	0.502255	Diet_Effect	ENSMUSG00000001420	Tmem79	protein_coding	ensembl_havana	88328655	88336148
4590.28	-0.031172	0.1104	-0.282356	0.777671	0.949496	Diet_Effect	ENSMUSG00000001424	Snd1	protein_coding	ensembl_havana	28475139	28935162
9333.85	0.227221	0.116177	1.95583	0.0504854	0.29172	Diet_Effect	ENSMUSG00000001435	Col18a1	protein_coding	ensembl_havana	77052178	77166548
1093.49	0.146571	0.124115	1.18092	0.237633	0.633517	Diet_Effect	ENSMUSG00000001436	Slc19a1	protein_coding	ensembl_havana	77032241	77061002
2738.62	-0.110042	0.120231	-0.915255	0.360058	0.750372	Diet_Effect	ENSMUSG00000001440	Kpnb1	protein_coding	ensembl_havana	97159714	97187881
4037.62	-0.315258	0.0922902	-3.41594	0.000635613	0.0151912	Diet_Effect	ENSMUSG00000001441	Npepps	protein_coding	ensembl_havana	97205842	97280638
1.28638	-0.532276	3.32415	-0.160124	0.872783		Diet_Effect	ENSMUSG00000001444	Tbx21	protein_coding	ensembl_havana	97098071	97115331
1898.99	0.105902	0.10261	1.03209	0.302031	0.69831	Diet_Effect	ENSMUSG00000001445	Mrpl10	protein_coding	ensembl_havana	97041560	97049213
14818.3	0.319439	0.081747	3.90766	9.3194e-05	0.00338715	Diet_Effect	ENSMUSG00000001467	Cyp51	protein_coding	ensembl_havana	4081145	4104746
11498.3	0.0113178	0.0904326	0.125152	0.900403	0.983856	Diet_Effect	ENSMUSG00000001472	Tcf25	protein_coding	ensembl_havana	123373753	123403835
4269.14	-0.487986	0.198618	-2.45691	0.0140139	0.132768	Diet_Effect	ENSMUSG00000001473	Tubb6	protein_coding	ensembl_havana	67390717	67402749
1549.16	0.21817	0.12818	1.70206	0.0887437	0.394614	Diet_Effect	ENSMUSG00000001482	Def8	protein_coding	ensembl_havana	123423527	123463270
3.68759	-3.41834	2.43055	-1.40641	0.159603		Diet_Effect	ENSMUSG00000001493	Meox1	protein_coding	ensembl_havana	101877510	101894374
4.20568	0.478937	3.32134	0.1442	0.885342		Diet_Effect	ENSMUSG00000001497	Pax9	protein_coding	ensembl_havana	56691767	56712822
1653.68	-2.46596	0.237613	-10.378	3.12159e-25	9.58694e-22	Diet_Effect	ENSMUSG00000001506	Col1a1	protein_coding	ensembl_havana	94936224	94953042
19302	-0.107692	0.103282	-1.0427	0.297086	0.693401	Diet_Effect	ENSMUSG00000001507	Itga3	protein_coding	ensembl_havana	95044474	95076801
2.82023	-2.24533	3.01451	-0.744842	0.456368		Diet_Effect	ENSMUSG00000001508	Sgca	protein_coding	ensembl_havana	94962791	94976327
3.55577	-1.72334	2.5019	-0.688815	0.49094		Diet_Effect	ENSMUSG00000001510	Dlx3	protein_coding	ensembl_havana	95120119	95125296
51.2532	2.92319	1.52071	1.92225	0.0545747	0.30245	Diet_Effect	ENSMUSG00000001517	Foxm1	protein_coding	ensembl_havana	128362967	128376146
1764.69	0.144435	0.106863	1.35159	0.176507	0.554088	Diet_Effect	ENSMUSG00000001518	Itfg2	protein_coding	ensembl_havana	128409444	128424931
235.203	0.0233975	0.220644	0.106042	0.915549	0.987168	Diet_Effect	ENSMUSG00000001520	Nrip2	protein_coding	ensembl_havana	128399296	128416427
771.23	0.00732615	0.168327	0.0435233	0.965284	0.994381	Diet_Effect	ENSMUSG00000001521	Tulp3	protein_coding	ensembl_havana	128321161	128355851
970.692	0.0785843	0.132922	0.591205	0.554383	0.870324	Diet_Effect	ENSMUSG00000001524	Gtf2h4	protein_coding	ensembl_havana	35667730	35673739
13796.6	0.045908	0.10242	0.448231	0.653986	0.912747	Diet_Effect	ENSMUSG00000001525	Tubb5	protein_coding	ensembl_havana	35833921	35838306
991.533	-0.325987	0.201494	-1.61785	0.105695	0.430515	Diet_Effect	ENSMUSG00000001542	Ell2	protein_coding	ensembl_havana	75706757	75772364
19422.5	-0.128013	0.0938065	-1.36465	0.172362	0.547883	Diet_Effect	ENSMUSG00000001552	Jup	protein_coding	ensembl_havana	100368958	100397763
600.166	0.229608	0.17122	1.34101	0.179918	0.560064	Diet_Effect	ENSMUSG00000001555	Fkbp10	protein_coding	ensembl_havana	100415697	100424824
28.515	1.11054	0.740225	1.50027	0.133544	0.484126	Diet_Effect	ENSMUSG00000001558	Klhl10	protein_coding	ensembl_havana	100441917	100457022
1832.84	0.124756	0.130072	0.959128	0.337494	0.728819	Diet_Effect	ENSMUSG00000001569	Nom1	protein_coding	ensembl_havana	29434664	29457843
3355.02	-0.00725082	0.102655	-0.0706326	0.94369	0.990816	Diet_Effect	ENSMUSG00000001576	Ergic1	protein_coding	ensembl_havana	26561489	26656934
821.898	0.316241	0.164235	1.92554	0.054162	0.301349	Diet_Effect	ENSMUSG00000001583	Tnk1	protein_coding	ensembl_havana	69851005	69858730
4.17982	-1.18345	1.72544	-0.685885	0.492785		Diet_Effect	ENSMUSG00000001588	Acap1	protein_coding	ensembl_havana	69881567	69895539
1573.02	-0.218504	0.149786	-1.45878	0.144627	0.502255	Diet_Effect	ENSMUSG00000001604	Tcea3	protein_coding	ensembl_havana	136247729	136274898
78650.8	-0.0502245	0.136881	-0.366922	0.713677	0.931977	Diet_Effect	ENSMUSG00000001627	Ifrd1	protein_coding	ensembl_havana	40201567	40248504
1520.06	-0.281572	0.15738	-1.78913	0.0735943	0.356638	Diet_Effect	ENSMUSG00000001630	Stk38l	protein_coding	ensembl_havana	146724995	146778812
720.581	-0.342417	0.164404	-2.08278	0.0372717	0.244938	Diet_Effect	ENSMUSG00000001632	Brpf1	protein_coding	ensembl_havana	113307137	113324860
1299.77	0.0305253	0.124584	0.245017	0.806443	0.957541	Diet_Effect	ENSMUSG00000001642	Akr1b3	protein_coding	ensembl_havana	34302434	34317478
1.74783	0.466214	3.3648	0.138556	0.889801		Diet_Effect	ENSMUSG00000001661	Hoxc6	protein_coding	ensembl_havana	102998257	103011881
17132.3	-0.0508206	0.0853597	-0.59537	0.551596	0.869365	Diet_Effect	ENSMUSG00000001663	Gstt1	protein_coding	ensembl_havana	75783813	75798584
1636.38	-0.16952	0.147402	-1.15005	0.250121	0.647242	Diet_Effect	ENSMUSG00000001665	Gstt3	protein_coding	ensembl_havana	75774115	75781414
278.013	-0.204044	0.20103	-1.01499	0.310109	0.703892	Diet_Effect	ENSMUSG00000001666	Ddt	protein_coding	ensembl_havana	75771230	75773414
748.866	-0.095793	0.249334	-0.384196	0.700833	0.926816	Diet_Effect	ENSMUSG00000001670	Tat	protein_coding	ensembl_havana	109990437	109999803
3148.7	0.0408351	0.0947137	0.431142	0.666365	0.916762	Diet_Effect	ENSMUSG00000001672	Marveld3	protein_coding	ensembl_havana	109947914	109962203
1420.47	-0.0960561	0.119654	-0.802782	0.422101	0.794165	Diet_Effect	ENSMUSG00000001674	Ddx18	protein_coding	ensembl_havana	121553835	121567989
4879.96	-0.0154032	0.104244	-0.147761	0.882531	0.978425	Diet_Effect	ENSMUSG00000001687	Ubl3	protein_coding	ensembl_havana	148504635	148552789
4848.06	-0.0319641	0.136906	-0.233474	0.815393	0.960844	Diet_Effect	ENSMUSG00000001700	Gramd3	protein_coding	ensembl_havana	56400337	56503792
1140.12	-0.243879	0.122867	-1.9849	0.0471554	0.28092	Diet_Effect	ENSMUSG00000001707	Eef1e1	protein_coding	ensembl_havana	38644207	38659058
1259.06	0.0511585	0.167861	0.304768	0.760543	0.944061	Diet_Effect	ENSMUSG00000001729	Akt1	protein_coding	ensembl_havana	112653821	112674884
338.175	0.493836	0.213785	2.30997	0.0208901	0.171161	Diet_Effect	ENSMUSG00000001739	Cldn15	protein_coding	ensembl_havana	136966616	136975858
615.088	0.0602677	0.178899	0.33688	0.736207	0.938394	Diet_Effect	ENSMUSG00000001741	Il16	protein_coding	ensembl_havana	83642825	83745726
3502.88	-0.0975426	0.126681	-0.769983	0.44131	0.808029	Diet_Effect	ENSMUSG00000001750	Tcirg1	protein_coding	ensembl_havana	3896050	3907133
2111.43	-0.0116426	0.11993	-0.0970779	0.922665	0.987738	Diet_Effect	ENSMUSG00000001751	Naglu	protein_coding	ensembl_havana	101070012	101077672
2346.71	0.153513	0.0965339	1.59025	0.111779	0.444592	Diet_Effect	ENSMUSG00000001755	Coasy	protein_coding	ensembl_havana	101082565	101086619
1024.85	0.281327	0.160813	1.74941	0.0802208	0.374103	Diet_Effect	ENSMUSG00000001761	Smo	protein_coding	ensembl_havana	29735503	29761365
369.635	-0.368926	0.244487	-1.50898	0.131303	0.480973	Diet_Effect	ENSMUSG00000001763	Tspan33	protein_coding	ensembl_havana	29694222	29718559
1438.14	0.0426148	0.139997	0.304398	0.760824	0.944215	Diet_Effect	ENSMUSG00000001767	Crnkl1	protein_coding	ensembl_havana	145917479	145935014
2064.42	0.0917221	0.12592	0.728416	0.466359	0.822928	Diet_Effect	ENSMUSG00000001768	Rin2	protein_coding	ensembl_havana	145675215	145887616
4234.2	-0.25015	0.140788	-1.77679	0.075603	0.361858	Diet_Effect	ENSMUSG00000001774	Chordc1	protein_coding	ensembl_havana	18292125	18317442
7844.56	0.0341694	0.0902643	0.378549	0.705023	0.928108	Diet_Effect	ENSMUSG00000001783	Rtcb	protein_coding	ensembl_havana	85938637	85957823
2717.93	0.00590443	0.139137	0.042436	0.966151	0.994448	Diet_Effect	ENSMUSG00000001785	Pwp1	protein_coding	ensembl_havana	85829494	85889096
1958.79	0.243003	0.113694	2.13734	0.03257	0.22754	Diet_Effect	ENSMUSG00000001786	Fbxo7	protein_coding	ensembl_havana	86021972	86051873
4941.17	-0.0996778	0.141113	-0.70637	0.479958	0.831221	Diet_Effect	ENSMUSG00000001794	Capns1	protein_coding	ensembl_havana	30186936	30198811
169.686	0.537358	0.32147	1.67156	0.0946106	0.406479	Diet_Effect	ENSMUSG00000001802	Lrp3	protein_coding	ensembl_havana	35200027	35215498
15.3188	-1.15671	0.962404	-1.2019	0.229403	0.622289	Diet_Effect	ENSMUSG00000001804	Dsg4	protein_coding	ensembl_havana	20436175	20471821
45.3937	-0.915869	0.537536	-1.70383	0.0884134	0.393751	Diet_Effect	ENSMUSG00000001827	Folr1	protein_coding	ensembl_havana	101858331	101870788
2554.9	0.0931171	0.0977231	0.952866	0.340658	0.731706	Diet_Effect	ENSMUSG00000001829	Clpb	protein_coding	ensembl_havana	101663633	101795506
6365.15	-0.0704921	0.084763	-0.831638	0.405613	0.78207	Diet_Effect	ENSMUSG00000001833	Septin7	protein_coding	ensembl_havana	25252439	25308571
1553.59	0.368718	0.116446	3.16644	0.00154319	0.0293764	Diet_Effect	ENSMUSG00000001844	Zdhhc4	protein_coding	ensembl_havana	143316489	143329256
12642.8	-0.276014	0.142998	-1.9302	0.0535822	0.299836	Diet_Effect	ENSMUSG00000001847	Rac1	protein_coding	ensembl_havana	143503634	143528036
985.467	0.119774	0.143926	0.832194	0.4053	0.781897	Diet_Effect	ENSMUSG00000001855	Nup214	protein_coding	ensembl_havana	31974436	32053975
2484.88	0.0968456	0.116237	0.833171	0.404748	0.781874	Diet_Effect	ENSMUSG00000001864	Aif1l	protein_coding	ensembl_havana	31950139	31973442
172.74	0.16189	0.270342	0.598834	0.549284	0.867826	Diet_Effect	ENSMUSG00000001870	Ltbp1	protein_coding	ensembl_havana	75005568	75392512
5766.06	-0.103886	0.091179	-1.13936	0.254553	0.650043	Diet_Effect	ENSMUSG00000001891	Ugp2	protein_coding	ensembl_havana	21321138	21371201
1.51409	-1.70165	3.30937	-0.514192	0.607118		Diet_Effect	ENSMUSG00000001901	Kcnh6	protein_coding	ensembl_havana	106008124	106034549
1816.74	0.120037	0.117393	1.02252	0.306534	0.701001	Diet_Effect	ENSMUSG00000001909	Trmt1	protein_coding	ensembl_havana	84686307	84699808
1244.62	-0.0298578	0.150422	-0.198493	0.842659	0.968089	Diet_Effect	ENSMUSG00000001910	Nacc1	protein_coding	ensembl_havana	84670479	84687902
2357.19	0.0876235	0.172162	0.508958	0.610781	0.897596	Diet_Effect	ENSMUSG00000001911	Nfix	protein_coding	ensembl_havana	84699876	84800344
1384.91	-0.597093	0.187658	-3.18182	0.00146354	0.0283015	Diet_Effect	ENSMUSG00000001918	Slc1a5	protein_coding	ensembl_havana	16781340	16798274
11263.2	0.0361997	0.0938177	0.385851	0.699607	0.926452	Diet_Effect	ENSMUSG00000001924	Uba1	protein_coding	ensembl_havana	20658326	20683179
35.3075	-0.970853	0.77203	-1.25753	0.208561	0.596797	Diet_Effect	ENSMUSG00000001930	Vwf	protein_coding	ensembl_havana	125546774	125686679
2495.79	0.0936886	0.105614	0.887087	0.375032	0.759252	Diet_Effect	ENSMUSG00000001942	Siae	protein_coding	ensembl_havana	37555698	37649655
1038.95	-1.83632	0.664487	-2.76352	0.00571818	0.073826	Diet_Effect	ENSMUSG00000001943	Vsig2	protein_coding	ensembl_havana	37539255	37544205
169.243	-1.32776	0.41802	-3.1763	0.00149164	0.0286317	Diet_Effect	ENSMUSG00000001946	Esam	protein_coding	ensembl_havana	37528078	37538319
306.174	0.163965	0.197948	0.828323	0.407487	0.783137	Diet_Effect	ENSMUSG00000001948	Spa17	protein_coding	ensembl_havana	37603290	37613722
2230.21	0.0184182	0.107316	0.171626	0.863732	0.973731	Diet_Effect	ENSMUSG00000001962	Fam50a	protein_coding	ensembl_havana	74313033	74320149
638.758	-0.0236954	0.140854	-0.168227	0.866405	0.97462	Diet_Effect	ENSMUSG00000001964	Emd	protein_coding	ensembl_havana	74254687	74261548
139.853	-0.282161	0.256303	-1.10089	0.270946	0.668818	Diet_Effect	ENSMUSG00000001983	Taco1	protein_coding	ensembl_havana	106066061	106073612
4.54066	2.88778	2.19691	1.31447	0.188688		Diet_Effect	ENSMUSG00000001985	Grik3	protein_coding	ensembl_havana	125490700	125714173
185.108	0.846746	0.255248	3.31735	0.00090876	0.019888	Diet_Effect	ENSMUSG00000001986	Gria3	protein_coding	ensembl_havana	41400854	41678601
17.8231	0.161043	0.746264	0.215799	0.829145	0.9635	Diet_Effect	ENSMUSG00000001988	Npas1	protein_coding	ensembl_havana	16455721	16477728
309.033	-0.721212	0.190467	-3.78655	0.000152751	0.00496429	Diet_Effect	ENSMUSG00000001995	Sipa1l2	protein_coding	ensembl_havana	125418063	125569808
643.779	-0.0588603	0.171134	-0.343943	0.730889	0.937354	Diet_Effect	ENSMUSG00000001998	Ap4e1	protein_coding	ensembl_havana	127008717	127067909
773.295	0.103133	0.149702	0.688919	0.490875	0.837842	Diet_Effect	ENSMUSG00000001999	Blvra	protein_coding	ensembl_havana	127070665	127097084
33.2738	-1.11223	0.560008	-1.9861	0.0470222	0.280686	Diet_Effect	ENSMUSG00000002006	Pdzd4	protein_coding	ensembl_havana	73793359	73824969
28.5838	0.250674	0.608333	0.412068	0.68029	0.920173	Diet_Effect	ENSMUSG00000002007	Srpk3	protein_coding	ensembl_havana	73774405	73778925
10275.7	-0.0456356	0.0893805	-0.510576	0.609648	0.897283	Diet_Effect	ENSMUSG00000002010	Idh3g	protein_coding	ensembl_havana	73778963	73786897
919.873	0.516368	0.141066	3.66047	0.00025175	0.0074224	Diet_Effect	ENSMUSG00000002012	Pnck	protein_coding	ensembl_havana	73655994	73660117
3462.99	-0.0606381	0.114618	-0.529047	0.596773	0.890363	Diet_Effect	ENSMUSG00000002014	Ssr4	protein_coding	ensembl_havana	73787028	73790830
12679.4	-0.0470257	0.0914436	-0.514259	0.607071	0.895954	Diet_Effect	ENSMUSG00000002015	Bcap31	protein_coding	ensembl_havana	73686178	73716175
1244.8	-0.107131	0.140989	-0.759852	0.447343	0.811304	Diet_Effect	ENSMUSG00000002017	Fam98a	protein_coding	ensembl_havana	75537086	75551946
153.259	-0.246879	0.384207	-0.642567	0.520505	0.85431	Diet_Effect	ENSMUSG00000002020	Ltbp2	protein_coding	ensembl_havana	84783212	84876532
2628.43	-0.291623	0.129169	-2.25768	0.0239657	0.187284	Diet_Effect	ENSMUSG00000002028	Kmt2a	protein_coding	ensembl_havana	44803355	44881296
1694.41	0.228883	0.108962	2.10057	0.0356788	0.239596	Diet_Effect	ENSMUSG00000002031	Ift46	protein_coding	ensembl_havana	44767908	44793447
1405.92	-0.0433715	0.128369	-0.337865	0.735465	0.938242	Diet_Effect	ENSMUSG00000002032	Tmem25	protein_coding	ensembl_havana	44793769	44799307
1539.05	0.0378892	0.111665	0.339311	0.734376	0.938242	Diet_Effect	ENSMUSG00000002043	Trappc6a	protein_coding	ensembl_havana	19508395	19516145
3701.68	-0.143305	0.121237	-1.18202	0.237196	0.632808	Diet_Effect	ENSMUSG00000002052	Supt6	protein_coding	ensembl_havana	78206746	78245987
66.4034	2.52232	0.645139	3.90973	9.23989e-05	0.00337155	Diet_Effect	ENSMUSG00000002055	Spag5	protein_coding	ensembl_havana	78301529	78322457
193.516	-0.305752	0.342474	-0.892775	0.371977	0.757145	Diet_Effect	ENSMUSG00000002057	Foxn1	protein_coding	ensembl_havana	78357577	78386558
147.83	0.0776953	0.337434	0.230253	0.817895	0.96139	Diet_Effect	ENSMUSG00000002058	Unc119	protein_coding	ensembl_havana	78343482	78349164
3208.72	0.0516236	0.111495	0.463013	0.643355	0.908614	Diet_Effect	ENSMUSG00000002059	Rab34	protein_coding	ensembl_havana	78188430	78192193
3090.63	-0.168098	0.110142	-1.5262	0.126961	0.474547	Diet_Effect	ENSMUSG00000002064	Sdf2	protein_coding	ensembl_havana	78245746	78255496
29.1132	0.705984	0.969233	0.728395	0.466372	0.822928	Diet_Effect	ENSMUSG00000002068	Ccne1	protein_coding	ensembl_havana	38097984	38107534
207.323	0.360673	0.306214	1.17785	0.238858	0.634763	Diet_Effect	ENSMUSG00000002076	Hsf2bp	protein_coding	ensembl_havana	31944769	32036349
360.586	-0.0603711	0.221438	-0.272632	0.785136	0.951447	Diet_Effect	ENSMUSG00000002083	Bbc3	protein_coding	ensembl_havana	16308393	16318205
10200	0.0340508	0.0868022	0.392281	0.694851	0.925146	Diet_Effect	ENSMUSG00000002102	Psmc3	protein_coding	ensembl_havana	91054009	91066369
1910.76	0.305276	0.141742	2.15375	0.03126	0.221479	Diet_Effect	ENSMUSG00000002103	Acp2	protein_coding	ensembl_havana	91202885	91214098
354.75	0.0356383	0.243672	0.146256	0.88372	0.978549	Diet_Effect	ENSMUSG00000002104	Rapsn	protein_coding	ensembl_havana	91035620	91045729
1208.41	-0.0936143	0.127729	-0.732915	0.463611	0.820885	Diet_Effect	ENSMUSG00000002105	Slc39a13	protein_coding	ensembl_havana	91061791	91070417
3534.26	0.025815	0.100796	0.256111	0.797866	0.956037	Diet_Effect	ENSMUSG00000002107	Celf2	protein_coding	ensembl_havana	6539694	7509563
1066.05	0.207049	0.126816	1.63267	0.102537	0.424112	Diet_Effect	ENSMUSG00000002108	Nr1h3	protein_coding	ensembl_havana	91184061	91202834
650.452	0.261865	0.174652	1.49935	0.133782	0.484705	Diet_Effect	ENSMUSG00000002109	Ddb2	protein_coding	ensembl_havana	91211572	91236982
8.07305	-3.09765	1.54138	-2.00965	0.0444681	0.271989	Diet_Effect	ENSMUSG00000002111	Spi1	protein_coding	ensembl_havana	91082390	91115756
3752.53	0.0277166	0.105275	0.263279	0.792336	0.954584	Diet_Effect	ENSMUSG00000002129	Sf3a1	protein_coding	ensembl_havana	4160350	4182541
6867.06	0.00532349	0.104089	0.0511435	0.959211	0.993443	Diet_Effect	ENSMUSG00000002147	Stat6	protein_coding	ensembl_havana	127642986	127660957
537.38	-1.13961	0.288136	-3.9551	7.65014e-05	0.00291862	Diet_Effect	ENSMUSG00000002204	Napsa	protein_coding	ensembl_havana	44572380	44586862
2951.42	0.141049	0.0954624	1.47754	0.139532	0.49521	Diet_Effect	ENSMUSG00000002205	Vrk3	protein_coding	ensembl_havana	44748413	44777515
1715.43	0.121217	0.124994	0.969788	0.332152	0.724071	Diet_Effect	ENSMUSG00000002210	Smg9	protein_coding	ensembl_havana	24399619	24422778
719.141	0.0390497	0.158648	0.246141	0.805573	0.957403	Diet_Effect	ENSMUSG00000002221	Paxip1	protein_coding	ensembl_havana	27740080	27791691
1442.24	-0.00468958	0.163555	-0.0286728	0.977126	0.997522	Diet_Effect	ENSMUSG00000002222	Rmnd5a	protein_coding	ensembl_havana	71388634	71440637
1493.96	-0.0401187	0.113877	-0.3523	0.724613	0.93568	Diet_Effect	ENSMUSG00000002227	Mov10	protein_coding	ensembl_havana	104794836	104818563
91.7789	-0.998569	0.390285	-2.55856	0.0105105	0.11061	Diet_Effect	ENSMUSG00000002228	Ppm1j	protein_coding	ensembl_havana	104781056	104786018
10035.1	-0.427168	0.103435	-4.12981	3.63066e-05	0.00160822	Diet_Effect	ENSMUSG00000002233	Rhoc	protein_coding	ensembl_havana	104788375	104794459
672.215	0.169119	0.187855	0.900264	0.36798	0.755303	Diet_Effect	ENSMUSG00000002249	Tead3	protein_coding	ensembl_havana	28331671	28350817
365.288	-0.484171	0.203775	-2.37601	0.0175009	0.154154	Diet_Effect	ENSMUSG00000002250	Ppard	protein_coding	ensembl_havana	28232700	28301474
22.0062	0.113507	0.655743	0.173096	0.862576	0.973522	Diet_Effect	ENSMUSG00000002257	Def6	protein_coding	ensembl_havana	28207778	28228608
999.031	0.139355	0.207647	0.671114	0.502148	0.844952	Diet_Effect	ENSMUSG00000002265	Peg3	protein_coding	ensembl_havana	6703892	6730431
4.16105	0.0856382	2.21756	0.0386182	0.969195		Diet_Effect	ENSMUSG00000002266	Zim1	protein_coding	ensembl_havana	6671269	6696450
47.4529	-0.180582	0.491656	-0.367293	0.7134	0.931818	Diet_Effect	ENSMUSG00000002274	Metrn	protein_coding	ensembl_havana	25793221	25797136
1752.09	0.04378	0.123677	0.353985	0.72335	0.935118	Diet_Effect	ENSMUSG00000002279	Lmf1	protein_coding	ensembl_havana	25579085	25662826
1441.38	0.424196	0.136107	3.11663	0.00182932	0.0332107	Diet_Effect	ENSMUSG00000002280	Ciao3	protein_coding	ensembl_havana	25773776	25783332
6346.91	1.66299	0.120704	13.7774	3.48423e-43	6.4204e-39	Diet_Effect	ENSMUSG00000002289	Angptl4	protein_coding	ensembl_havana	33773750	33781830
67.5748	0.865343	0.406952	2.1264	0.0334699	0.231339	Diet_Effect	ENSMUSG00000002297	Dbf4	protein_coding	ensembl_havana	8396973	8422716
1646.05	0.06476	0.110668	0.585174	0.558431	0.872273	Diet_Effect	ENSMUSG00000002307	Daxx	protein_coding	ensembl_havana	33909414	33915590
870.537	-0.0792387	0.140305	-0.56476	0.572237	0.878791	Diet_Effect	ENSMUSG00000002308	Cd320	protein_coding	ensembl_havana	33843091	33849774
1269.96	0.145271	0.126671	1.14684	0.25145	0.647623	Diet_Effect	ENSMUSG00000002319	Ipo4	protein_coding	ensembl_havana	55625400	55635957
3851.23	-0.0180298	0.0961456	-0.187526	0.851248	0.970305	Diet_Effect	ENSMUSG00000002320	Tm9sf1	protein_coding	ensembl_havana	55635965	55643806
161.247	-0.0405775	0.3541	-0.114593	0.908768	0.985572	Diet_Effect	ENSMUSG00000002324	Rec8	protein_coding	ensembl_havana	55618037	55625395
4140.91	0.303424	0.0983057	3.08653	0.00202507	0.0356068	Diet_Effect	ENSMUSG00000002325	Irf9	protein_coding	ensembl_havana	55603571	55610030
575.577	-0.0538618	0.176344	-0.305436	0.760034	0.944043	Diet_Effect	ENSMUSG00000002326	Gmpr2	protein_coding	ensembl_havana	55671941	55679200
1116.87	0.14897	0.13324	1.11806	0.263543	0.660572	Diet_Effect	ENSMUSG00000002329	Mdp1	protein_coding	ensembl_havana	55657879	55660508
3045.44	0.124294	0.106662	1.16531	0.243894	0.639749	Diet_Effect	ENSMUSG00000002332	Dhrs1	protein_coding	ensembl_havana	55739020	55745690
3.84736	-0.834598	2.54093	-0.328462	0.742563		Diet_Effect	ENSMUSG00000002341	Ncan	protein_coding	ensembl_havana	70093085	70120873
3133.97	0.299615	0.11362	2.63699	0.00836449	0.0945018	Diet_Effect	ENSMUSG00000002342	Tmem161a	protein_coding	ensembl_havana	70172356	70183681
520.737	0.247329	0.181235	1.36469	0.172352	0.547883	Diet_Effect	ENSMUSG00000002343	Armc6	protein_coding	ensembl_havana	70220172	70234466
1125.2	0.113063	0.119661	0.944861	0.34473	0.736504	Diet_Effect	ENSMUSG00000002345	Borcs8	protein_coding	ensembl_havana	70139499	70147319
928.33	0.601966	0.179223	3.35874	0.000782978	0.0178123	Diet_Effect	ENSMUSG00000002346	Slc25a42	protein_coding	ensembl_havana	70184340	70212305
953.283	0.0295015	0.154254	0.191253	0.848327	0.969074	Diet_Effect	ENSMUSG00000002365	Snx9	protein_coding	ensembl_havana	5841329	5931954
3339.9	0.131594	0.0903659	1.45623	0.145329	0.503095	Diet_Effect	ENSMUSG00000002372	Ranbp3	protein_coding	ensembl_havana	56673294	56711764
1562.26	-0.0795634	0.143515	-0.554393	0.57931	0.881342	Diet_Effect	ENSMUSG00000002379	Ndufa11	protein_coding	ensembl_havana	56717767	56722141
283.631	-0.042884	0.217475	-0.19719	0.843679	0.968145	Diet_Effect	ENSMUSG00000002384	Bmp8b	protein_coding	ensembl_havana	123105165	123132099
291.39	-0.0655075	0.290209	-0.225726	0.821415	0.96271	Diet_Effect	ENSMUSG00000002393	Nr2f6	protein_coding	ensembl_havana	71374123	71381960
3632.5	-0.08686	0.113602	-0.764597	0.444512	0.810269	Diet_Effect	ENSMUSG00000002395	Use1	protein_coding	ensembl_havana	71366848	71369732
415.805	-0.024802	0.170159	-0.145758	0.884112	0.978549	Diet_Effect	ENSMUSG00000002396	Ocel1	protein_coding	ensembl_havana	71371298	71379361
572.525	0.774779	0.208846	3.70982	0.000207409	0.0063068	Diet_Effect	ENSMUSG00000002409	Dyrk1b	protein_coding	ensembl_havana	28179469	28187294
1478.25	-0.241717	0.108826	-2.22113	0.0263421	0.198392	Diet_Effect	ENSMUSG00000002413	Braf	protein_coding	ensembl_havana	39603237	39725463
413.07	0.00507015	0.165429	0.0306484	0.97555	0.997105	Diet_Effect	ENSMUSG00000002416	Ndufb2	protein_coding	ensembl_havana	39592574	39603382
1166.95	0.0468457	0.131534	0.356149	0.721729	0.934268	Diet_Effect	ENSMUSG00000002428	Hltf	protein_coding	ensembl_havana	20057811	20118490
5319.7	-0.205214	0.107862	-1.90256	0.0570981	0.310482	Diet_Effect	ENSMUSG00000002455	Prpf6	protein_coding	ensembl_havana	181591868	181655660
872.953	0.112422	0.137821	0.815705	0.414669	0.787516	Diet_Effect	ENSMUSG00000002458	Rgs19	protein_coding	ensembl_havana	181688419	181693977
4.10348	0.559354	1.96285	0.284971	0.775666		Diet_Effect	ENSMUSG00000002459	Rgs20	protein_coding	ensembl_havana	4909576	5070285
455.152	-0.125724	0.214627	-0.585779	0.558024	0.8721	Diet_Effect	ENSMUSG00000002475	Abhd3	protein_coding	ensembl_havana	10642092	10706771
2278.7	-0.0176788	0.123582	-0.143053	0.886248	0.978676	Diet_Effect	ENSMUSG00000002477	Snrpd1	protein_coding	ensembl_havana	10617775	10642079
674.758	0.129357	0.167469	0.772421	0.439865	0.807471	Diet_Effect	ENSMUSG00000002486	Tchp	protein_coding	ensembl_havana	114707760	114722327
83.9726	1.14182	0.455736	2.50545	0.0122296	0.121748	Diet_Effect	ENSMUSG00000002489	Tiam1	protein_coding	ensembl_havana	89787111	90143769
2739.78	0.138901	0.137146	1.0128	0.311156	0.704729	Diet_Effect	ENSMUSG00000002496	Tsc2	protein_coding	ensembl_havana	24595816	24632630
2.55076	1.6318	3.15626	0.517004	0.605153		Diet_Effect	ENSMUSG00000002500	Rpl3l	protein_coding	ensembl_havana	24727820	24736143
3339.55	-0.00753106	0.0955348	-0.0788305	0.937167	0.989752	Diet_Effect	ENSMUSG00000002504	Slc9a3r2	protein_coding	ensembl_havana	24639286	24650327
15681.7	-0.00393964	0.0820593	-0.0480097	0.961709	0.993555	Diet_Effect	ENSMUSG00000002524	Puf60	protein_coding	ensembl_havana	76070182	76080924
2480.32	-0.0269887	0.107084	-0.252033	0.801016	0.956274	Diet_Effect	ENSMUSG00000002546	Golga2	protein_coding	ensembl_havana	32287384	32307921
2247.7	0.16243	0.0980109	1.65726	0.0974661	0.412999	Diet_Effect	ENSMUSG00000002550	Uck1	protein_coding	ensembl_havana	32255002	32260159
7.83081	-0.11343	1.3851	-0.0818926	0.934732	0.98928	Diet_Effect	ENSMUSG00000002565	Scin	protein_coding	ensembl_havana	40059769	40134228
3032.14	-0.189033	0.170009	-1.1119	0.26618	0.663003	Diet_Effect	ENSMUSG00000002578	Ikzf4	protein_coding	ensembl_havana	128630843	128669358
1222.24	-0.206965	0.141193	-1.46583	0.142694	0.500228	Diet_Effect	ENSMUSG00000002580	Mien1	protein_coding	ensembl_havana	98437708	98438991
10.9924	2.3567	1.35659	1.73722	0.0823477	0.379355	Diet_Effect	ENSMUSG00000002588	Pon1	protein_coding	ensembl_havana	5168090	5193946
279.961	-1.93741	0.260789	-7.42904	1.09388e-13	5.44783e-11	Diet_Effect	ENSMUSG00000002602	Axl	protein_coding	ensembl_havana	25757273	25788705
21.9652	-1.00572	0.785157	-1.28092	0.200221	0.587028	Diet_Effect	ENSMUSG00000002603	Tgfb1	protein_coding	ensembl_havana	25687002	25705077
2023.51	0.0305002	0.120483	0.25315	0.800152	0.956037	Diet_Effect	ENSMUSG00000002608	Ccdc97	protein_coding	ensembl_havana	25711106	25719088
181.81	0.85227	0.295854	2.88071	0.0039678	0.0582124	Diet_Effect	ENSMUSG00000002617	Zfp40	protein_coding	ensembl_havana	23173869	23193252
4675.82	0.0268396	0.101273	0.265021	0.790993	0.954215	Diet_Effect	ENSMUSG00000002625	Akap8l	protein_coding	ensembl_havana	32321424	32350607
98.9359	-2.07546	0.703504	-2.95018	0.0031759	0.0493859	Diet_Effect	ENSMUSG00000002633	Shh	protein_coding	ensembl_havana	28456815	28467256
1571.5	-0.0121921	0.115216	-0.105819	0.915726	0.987168	Diet_Effect	ENSMUSG00000002635	Pdcd2l	protein_coding	ensembl_havana	34184499	34196661
2841.91	-0.0201855	0.102089	-0.197725	0.84326	0.968145	Diet_Effect	ENSMUSG00000002658	Gtf2f1	protein_coding	ensembl	57003405	57011288
3398.58	-0.0222509	0.10465	-0.212622	0.831622	0.964138	Diet_Effect	ENSMUSG00000002660	Clpp	protein_coding	ensembl_havana	56990305	56996188
978.488	-0.036789	0.136696	-0.26913	0.78783	0.952706	Diet_Effect	ENSMUSG00000002661	Alkbh7	protein_coding	ensembl_havana	56997339	56999322
11.293	1.10441	0.968063	1.14085	0.253934	0.649465	Diet_Effect	ENSMUSG00000002664	Pspn	protein_coding	ensembl_havana	56999457	57000018
665.416	-0.0651354	0.148594	-0.438345	0.661136	0.914529	Diet_Effect	ENSMUSG00000002668	Dennd1c	protein_coding	ensembl_havana	57065905	57078514
1270.64	0.132405	0.115638	1.145	0.252208	0.648112	Diet_Effect	ENSMUSG00000002679	Med6	protein_coding	ensembl_havana	81573557	81595008
74.698	0.208552	0.429342	0.485748	0.627146	0.90274	Diet_Effect	ENSMUSG00000002688	Prkd1	protein_coding	ensembl_havana	50341231	50649098
3.56837	-1.82696	2.30047	-0.794168	0.427098		Diet_Effect	ENSMUSG00000002699	Lcp2	protein_coding	ensembl_havana	34046920	34092295
3965.86	0.0745398	0.0937456	0.795129	0.426539	0.797328	Diet_Effect	ENSMUSG00000002718	Cse1l	protein_coding	ensembl_havana	166906040	166946389
3107.42	-0.08107	0.112542	-0.720351	0.471309	0.82577	Diet_Effect	ENSMUSG00000002728	Naa20	protein_coding	ensembl_havana	145902099	145916425
1100.15	0.232526	0.136392	1.70484	0.0882247	0.393379	Diet_Effect	ENSMUSG00000002731	Prkra	protein_coding	ensembl_havana	76629898	76648015
273.018	0.128499	0.196688	0.653314	0.513554	0.851312	Diet_Effect	ENSMUSG00000002732	Fkbp7	protein_coding	ensembl_havana	76663044	76673116
271.5	-0.194512	0.209541	-0.928275	0.353265	0.743871	Diet_Effect	ENSMUSG00000002733	Plekha3	protein_coding	ensembl_havana	76675281	76696828
1491.04	0.103711	0.123611	0.839009	0.401464	0.779616	Diet_Effect	ENSMUSG00000002741	Ykt6	protein_coding	ensembl_havana	5955693	5967780
3000.4	0.0938103	0.128697	0.728926	0.466047	0.822827	Diet_Effect	ENSMUSG00000002748	Baz1b	protein_coding	ensembl_havana	135187264	135246129
1136.98	-0.0121008	0.197626	-0.0612307	0.951175	0.992151	Diet_Effect	ENSMUSG00000002763	Pex6	protein_coding	ensembl_havana	46711463	46725541
2139.64	-0.0293846	0.106834	-0.27505	0.783278	0.950741	Diet_Effect	ENSMUSG00000002767	Mrpl2	protein_coding	ensembl_havana	46646229	46650139
2979.74	0.0298941	0.0996945	0.299857	0.764286	0.945138	Diet_Effect	ENSMUSG00000002768	Mea1	protein_coding	ensembl_havana	46678793	46683111
188.786	-0.130201	0.296965	-0.438437	0.66107	0.914529	Diet_Effect	ENSMUSG00000002769	Gnmt	protein_coding	ensembl_havana	46725664	46729168
35.1205	-0.319921	0.530563	-0.602984	0.546519	0.866635	Diet_Effect	ENSMUSG00000002771	Grin2d	protein_coding	ensembl_havana	45831883	45878378
1632.33	0.0551813	0.114956	0.480022	0.631212	0.904051	Diet_Effect	ENSMUSG00000002778	Kdelr1	protein_coding	ensembl_havana	45872772	45883732
314.524	0.334748	0.194488	1.72117	0.0852191	0.386116	Diet_Effect	ENSMUSG00000002781	Tmem143	protein_coding	ensembl_havana	45896941	45917413
8.13653	0.764557	1.3694	0.558316	0.576629	0.881148	Diet_Effect	ENSMUSG00000002791	Pdxk-ps	transcribed_unprocessed_pseudogene	havana	32076083	32107350
1723.79	-0.0698496	0.146468	-0.476893	0.633438	0.904885	Diet_Effect	ENSMUSG00000002797	Ggct	protein_coding	ensembl_havana	54982580	54992950
173.092	-0.590367	0.296885	-1.98854	0.0467524	0.279619	Diet_Effect	ENSMUSG00000002799	Jag2	protein_coding	ensembl_havana	112907819	112929776
1068.68	0.315454	0.131051	2.40711	0.0160794	0.145548	Diet_Effect	ENSMUSG00000002803	Btbd6	protein_coding	ensembl_havana	112976482	112978945
1815.19	0.123435	0.113177	1.09064	0.27543	0.673814	Diet_Effect	ENSMUSG00000002804	Nudt14	protein_coding	ensembl_havana	112934291	112942124
3428.47	0.142423	0.122298	1.16456	0.244199	0.640001	Diet_Effect	ENSMUSG00000002808	Epdr1	protein_coding	ensembl_havana	19591706	19619927
5938.19	-0.0048596	0.111805	-0.0434651	0.965331	0.994381	Diet_Effect	ENSMUSG00000002812	Flii	protein_coding	ensembl_havana	60714123	60727263
682.758	0.241281	0.14349	1.68152	0.0926622	0.403089	Diet_Effect	ENSMUSG00000002814	Top3a	protein_coding	ensembl_havana	60740058	60777365
1507.95	-0.232509	0.126091	-1.84398	0.0651855	0.333752	Diet_Effect	ENSMUSG00000002820	Atg4d	protein_coding	ensembl_havana	21265293	21277772
1469.61	-0.0618975	0.110471	-0.560304	0.575272	0.880377	Diet_Effect	ENSMUSG00000002825	Qtrt1	protein_coding	ensembl_havana	21411837	21420274
94.1247	-0.457953	0.400883	-1.14236	0.253305	0.648927	Diet_Effect	ENSMUSG00000002831	Plin4	protein_coding	ensembl_havana	56100591	56109803
1622.22	0.138478	0.142096	0.974542	0.329788	0.722353	Diet_Effect	ENSMUSG00000002833	Hdgfl2	protein_coding	ensembl_havana	56079634	56100607
123.001	1.23465	0.390518	3.16157	0.00156919	0.0296874	Diet_Effect	ENSMUSG00000002835	Chaf1a	protein_coding	ensembl_havana	56040439	56072289
1913.3	0.226854	0.105629	2.14765	0.0317415	0.223415	Diet_Effect	ENSMUSG00000002844	Adprh	protein_coding	ensembl_havana	38444030	38452703
1667.29	-0.0174025	0.111366	-0.156265	0.875825	0.977178	Diet_Effect	ENSMUSG00000002845	Tmem39a	protein_coding	ensembl_havana	38558698	38592162
1148.04	0.0234429	0.146762	0.159735	0.87309	0.976536	Diet_Effect	ENSMUSG00000002846	Timmdc1	protein_coding	ensembl_havana	38498347	38522663
746.45	-0.467454	0.185067	-2.52586	0.0115416	0.117631	Diet_Effect	ENSMUSG00000002847	Pla1a	protein_coding	ensembl_havana	38396117	38433145
1414.81	0.757273	0.177883	4.25714	2.07058e-05	0.00103301	Diet_Effect	ENSMUSG00000002870	Mcm2	protein_coding	ensembl_havana	88883474	88898780
3538.05	0.185351	0.104498	1.77373	0.0761073	0.363104	Diet_Effect	ENSMUSG00000002871	Tpra1	protein_coding	ensembl_havana	88902251	88912238
2465.66	-0.40559	0.138471	-2.92906	0.00339992	0.0518199	Diet_Effect	ENSMUSG00000002881	Nab1	protein_coding	ensembl_havana	52457294	52500679
2473.83	0.0858584	0.118891	0.722163	0.470194	0.825632	Diet_Effect	ENSMUSG00000002885	Adgre5	protein_coding	ensembl_havana	83723251	83741326
1034.24	-0.165068	0.155414	-1.06211	0.288184	0.684595	Diet_Effect	ENSMUSG00000002897	Il17ra	protein_coding	ensembl_havana	120463247	120487559
1639.3	-0.140527	0.203303	-0.69122	0.489428	0.836923	Diet_Effect	ENSMUSG00000002900	Lamb1	protein_coding	ensembl_havana	31265234	31329644
89.4481	-0.050362	0.392125	-0.128433	0.897806	0.983506	Diet_Effect	ENSMUSG00000002908	Kcnn1	protein_coding	ensembl_havana	70842049	70863258
857.622	0.30388	0.163667	1.8567	0.0633543	0.329969	Diet_Effect	ENSMUSG00000002910	Arrdc2	protein_coding	ensembl_havana	70835129	70839720
7308.24	0.697545	0.147093	4.7422	2.11411e-06	0.000153979	Diet_Effect	ENSMUSG00000002944	Cd36	protein_coding	ensembl_havana	17781690	17888801
1161.61	0.0194223	0.119247	0.162876	0.870616	0.976282	Diet_Effect	ENSMUSG00000002948	Map2k7	protein_coding	ensembl_havana	4238740	4247897
2876.28	0.0712916	0.093721	0.760679	0.446849	0.811247	Diet_Effect	ENSMUSG00000002949	Timm44	protein_coding	ensembl_havana	4259731	4275913
5013.06	-0.0492737	0.0912499	-0.539987	0.589206	0.886382	Diet_Effect	ENSMUSG00000002957	Ap2a2	protein_coding	ensembl_havana	141562173	141633011
1232.17	0.174871	0.117922	1.48295	0.138089	0.492368	Diet_Effect	ENSMUSG00000002963	Pnkp	protein_coding	ensembl_havana	44857139	44862992
4446.81	0.132343	0.108934	1.21489	0.224408	0.618297	Diet_Effect	ENSMUSG00000002968	Med25	protein_coding	ensembl_havana	44876765	44892712
17726.2	0.124694	0.097399	1.28024	0.20046	0.587189	Diet_Effect	ENSMUSG00000002980	Bcam	protein_coding	ensembl_havana	19756131	19771016
11942.7	-0.150699	0.123455	-1.22068	0.222206	0.615451	Diet_Effect	ENSMUSG00000002981	Clptm1	protein_coding	ensembl_havana	19631571	19665033
4488.57	-0.298346	0.101913	-2.92746	0.00341741	0.0519576	Diet_Effect	ENSMUSG00000002983	Relb	protein_coding	ensembl_havana	19606217	19629438
2566.56	0.0413476	0.095838	0.431432	0.666154	0.916711	Diet_Effect	ENSMUSG00000002984	Tomm40	protein_coding	ensembl_havana	19701313	19715438
442320	-0.158685	0.0946584	-1.6764	0.0936607	0.404568	Diet_Effect	ENSMUSG00000002985	Apoe	protein_coding	ensembl_havana	19696109	19699188
1.37047	-1.73219	3.30343	-0.524359	0.600029		Diet_Effect	ENSMUSG00000002992	Apoc2	protein_coding	ensembl_havana	19671579	19677941
3462.7	0.119913	0.114202	1.05	0.293716	0.690665	Diet_Effect	ENSMUSG00000002996	Hbp1	protein_coding	ensembl_havana	31926254	31950535
75.8145	-0.0267576	0.446652	-0.0599069	0.95223	0.992151	Diet_Effect	ENSMUSG00000002997	Prkar2b	protein_coding	ensembl_havana	31958476	32061296
2271.63	-0.0484763	0.120804	-0.40128	0.688214	0.923569	Diet_Effect	ENSMUSG00000003031	Cdkn1b	protein_coding	ensembl_havana	134920401	134925513
615.984	-0.437573	0.200624	-2.18106	0.0291793	0.211542	Diet_Effect	ENSMUSG00000003032	Klf4	protein_coding	ensembl_havana	55527143	55532466
2622.14	0.283783	0.105408	2.69223	0.00709769	0.0838392	Diet_Effect	ENSMUSG00000003033	Ap1m1	protein_coding	ensembl_havana	72240018	72257385
5788.52	-0.0984591	0.0937991	-1.04968	0.293865	0.690695	Diet_Effect	ENSMUSG00000003037	Rab8a	protein_coding	ensembl_havana	72161200	72183904
9577.35	0.339779	0.0836894	4.06	4.90732e-05	0.00203207	Diet_Effect	ENSMUSG00000003038	Hmgn2	protein_coding	ensembl_havana	133964738	133968650
7034.67	0.00626867	0.0906551	0.0691485	0.944871	0.990816	Diet_Effect	ENSMUSG00000003039	Fam32a	protein_coding	ensembl_havana	72219730	72224418
48625.7	-0.0548381	0.142487	-0.384865	0.700337	0.926753	Diet_Effect	ENSMUSG00000003051	Elf3	protein_coding	ensembl_havana	135253575	135258568
1.36154	-2.1578	3.36312	-0.641607	0.521129		Diet_Effect	ENSMUSG00000003053	Cyp2c29	protein_coding	ensembl_havana	39269405	39330713
2407.37	0.101451	0.102494	0.989823	0.322261	0.714574	Diet_Effect	ENSMUSG00000003062	Stard3nl	protein_coding	ensembl_havana	19357676	19395795
1257.04	-0.342699	0.209027	-1.6395	0.101109	0.422003	Diet_Effect	ENSMUSG00000003068	Stk11	protein_coding	ensembl_havana	80115803	80130682
231.424	-0.472735	0.262244	-1.80265	0.0714434	0.351532	Diet_Effect	ENSMUSG00000003070	Efna2	protein_coding	ensembl_havana	80179482	80190010
11791.4	-0.0901956	0.095749	-0.942	0.346193	0.737958	Diet_Effect	ENSMUSG00000003072	Atp5d	protein_coding	ensembl_havana	80138632	80145818
3979.81	0.19493	0.0997767	1.95366	0.0507414	0.292465	Diet_Effect	ENSMUSG00000003099	Ppp5c	protein_coding	ensembl_havana	17004640	17027924
936.593	-0.159389	0.146125	-1.09077	0.275374	0.673814	Diet_Effect	ENSMUSG00000003119	Cdk12	protein_coding	ensembl_havana	98203059	98278504
1147	0.314509	0.137264	2.29127	0.0219478	0.176606	Diet_Effect	ENSMUSG00000003123	Lipe	protein_coding	ensembl_havana	25379527	25398710
5490.12	-0.021188	0.100338	-0.211166	0.832758	0.964144	Diet_Effect	ENSMUSG00000003131	Pafah1b2	protein_coding	ensembl_havana	45962859	46012690
754.929	0.411358	0.161833	2.54187	0.011026	0.114112	Diet_Effect	ENSMUSG00000003134	Tbc1d8	protein_coding	ensembl_havana	39371492	39478755
107.296	-0.196745	0.352674	-0.557866	0.576936	0.8812	Diet_Effect	ENSMUSG00000003135	Cnot11	protein_coding	ensembl_havana	39534992	39546889
32.3612	-1.16395	0.679876	-1.712	0.0868972	0.389789	Diet_Effect	ENSMUSG00000003153	Slc2a3	protein_coding	ensembl_havana	122727809	122801640
875.243	-0.0807097	0.190086	-0.424597	0.671131	0.918342	Diet_Effect	ENSMUSG00000003154	Foxj2	protein_coding	ensembl_havana	122819914	122845366
9720.18	0.0613627	0.0945904	0.64872	0.516519	0.852782	Diet_Effect	ENSMUSG00000003161	Sri	protein_coding	ensembl_havana	8046078	8069379
3154.58	0.165997	0.111572	1.4878	0.136803	0.490632	Diet_Effect	ENSMUSG00000003166	Dgcr2	protein_coding	ensembl_havana	17839482	17898562
4561.1	0.0136953	0.106228	0.128923	0.897418	0.983506	Diet_Effect	ENSMUSG00000003184	Irf3	protein_coding	ensembl_havana	44997648	45002848
397.152	0.3973	0.19007	2.09028	0.0365925	0.242699	Diet_Effect	ENSMUSG00000003190	Bcl2l12	protein_coding	ensembl_havana	44991222	44998712
500.165	-0.255494	0.163967	-1.5582	0.119185	0.459558	Diet_Effect	ENSMUSG00000003198	Zfp959	protein_coding	ensembl_havana	55892093	55898928
483.687	-0.185422	0.20954	-0.884902	0.37621	0.759948	Diet_Effect	ENSMUSG00000003199	Mpnd	protein_coding	ensembl_havana	56005711	56016790
6666.82	0.0657238	0.0866969	0.758088	0.448399	0.811814	Diet_Effect	ENSMUSG00000003200	Sh3gl1	protein_coding	ensembl_havana	56016750	56036635
11.1812	0.872371	1.00589	0.867267	0.385796	0.767447	Diet_Effect	ENSMUSG00000003206	Ebi3	protein_coding	ensembl_havana	55952640	55957022
675.317	0.187652	0.154198	1.21695	0.223621	0.61752	Diet_Effect	ENSMUSG00000003208	Yju2	protein_coding	ensembl_havana	55959099	55968285
1891.56	-0.236445	0.146549	-1.61342	0.106654	0.432477	Diet_Effect	ENSMUSG00000003226	Ranbp2	protein_coding	ensembl_havana	58446920	58494356
25.3787	1.56589	0.676301	2.31537	0.0205927	0.169478	Diet_Effect	ENSMUSG00000003227	Edar	protein_coding	ensembl_havana	58600789	58675654
802.808	-0.254104	0.189718	-1.33938	0.180448	0.560708	Diet_Effect	ENSMUSG00000003228	Grk5	protein_coding	ensembl_havana	60889749	61095968
2066.76	-0.026014	0.101508	-0.256276	0.797738	0.956037	Diet_Effect	ENSMUSG00000003233	Dvl3	protein_coding	ensembl_havana	20516982	20534010
3444.91	-0.0595454	0.102234	-0.582444	0.560267	0.87343	Diet_Effect	ENSMUSG00000003234	Abcf3	protein_coding	ensembl_havana	20548577	20561379
1320.49	-0.0685862	0.174819	-0.392326	0.694817	0.925146	Diet_Effect	ENSMUSG00000003235	Eif2b5	protein_coding	ensembl_havana	20498817	20509323
4782.43	-0.0032547	0.0946176	-0.0343985	0.972559	0.996738	Diet_Effect	ENSMUSG00000003269	Cyth2	protein_coding	ensembl_havana	45806637	45814581
867.669	0.00853979	0.138115	0.0618309	0.950697	0.992151	Diet_Effect	ENSMUSG00000003271	Sult2b1	protein_coding	ensembl_havana	45729983	45784669
331.343	-0.356371	0.196765	-1.81115	0.0701176	0.347982	Diet_Effect	ENSMUSG00000003273	Car11	protein_coding	ensembl_havana	45699843	45704682
203.267	-0.0375988	0.261463	-0.143801	0.885657	0.978549	Diet_Effect	ENSMUSG00000003279	Dlgap1	protein_coding	ensembl_havana	69969073	70821413
8.24916	-1.45329	1.26454	-1.14926	0.250449	0.647578	Diet_Effect	ENSMUSG00000003282	Plag1	protein_coding	ensembl_havana	3900996	3938423
85.1306	-1.59229	0.608104	-2.61844	0.00883325	0.0979258	Diet_Effect	ENSMUSG00000003283	Hck	protein_coding	ensembl_havana	153108468	153151441
4266.04	0.101432	0.0936695	1.08287	0.278867	0.677479	Diet_Effect	ENSMUSG00000003299	Mrpl4	protein_coding	ensembl_havana	21002738	21008839
1548.74	0.0773645	0.114968	0.672919	0.500999	0.844508	Diet_Effect	ENSMUSG00000003308	Keap1	protein_coding	ensembl_havana	21229730	21239361
4952.71	0.16813	0.086811	1.93674	0.0527771	0.298505	Diet_Effect	ENSMUSG00000003309	Ap1m2	protein_coding	ensembl_havana	21294275	21312337
4636.35	-0.000973822	0.114734	-0.00848767	0.993228	0.998919	Diet_Effect	ENSMUSG00000003316	Glg1	protein_coding	ensembl_havana	111154421	111259216
4.55779	-0.632174	2.2872	-0.276397	0.782243		Diet_Effect	ENSMUSG00000003341	Atp8b3	protein_coding	ensembl_havana	80519584	80539124
827.509	-0.176952	0.172741	-1.02438	0.305657	0.70073	Diet_Effect	ENSMUSG00000003344	Btbd2	protein_coding	ensembl_havana	80642617	80657071
830.088	-0.107795	0.194459	-0.554334	0.57935	0.881342	Diet_Effect	ENSMUSG00000003345	Csnk1g2	protein_coding	ensembl_havana	80622838	80640749
338.756	0.120553	0.221295	0.544763	0.585917	0.884394	Diet_Effect	ENSMUSG00000003346	Abhd17a	protein_coding	ensembl_havana	80583654	80590341
7460.75	-0.0780309	0.154679	-0.504468	0.613932	0.898891	Diet_Effect	ENSMUSG00000003348	Mob3a	protein_coding	ensembl_havana	80685253	80701977
492.546	-0.046913	0.18881	-0.248466	0.803774	0.956926	Diet_Effect	ENSMUSG00000003352	Cacnb3	protein_coding	ensembl_havana	98630840	98644529
200.452	0.854179	0.323354	2.64162	0.00825113	0.0935576	Diet_Effect	ENSMUSG00000003354	Ccdc65	protein_coding	ensembl_havana	98708207	98723336
250.688	-0.109965	0.280306	-0.392302	0.694835	0.925146	Diet_Effect	ENSMUSG00000003355	Fkbp11	protein_coding	ensembl_havana	98724366	98728198
365.535	-0.0385366	0.26056	-0.147899	0.882422	0.978363	Diet_Effect	ENSMUSG00000003360	Ddx23	protein_coding	ensembl_havana	98645134	98662894
5284.62	-0.00220443	0.0900754	-0.0244731	0.980475	0.998318	Diet_Effect	ENSMUSG00000003363	Pld3	protein_coding	ensembl_havana	27532000	27553218
108.11	-0.105696	0.340325	-0.310575	0.756124	0.9435	Diet_Effect	ENSMUSG00000003378	Grik5	protein_coding	ensembl_havana	25009849	25072346
16.0642	-0.285949	0.835456	-0.342267	0.73215	0.937354	Diet_Effect	ENSMUSG00000003379	Cd79a	protein_coding	ensembl_havana	24897381	24902197
7646.31	0.0612209	0.0973635	0.628787	0.529489	0.858805	Diet_Effect	ENSMUSG00000003380	Rabac1	protein_coding	ensembl_havana	24969752	24972754
4810.92	-0.398293	0.104894	-3.7971	0.000146401	0.00481738	Diet_Effect	ENSMUSG00000003382	Etv3	protein_coding	ensembl_havana	87525407	87540156
6726.34	0.0776071	0.102118	0.759975	0.44727	0.811304	Diet_Effect	ENSMUSG00000003402	Prkcsh	protein_coding	ensembl_havana	22002806	22014222
15.6576	-2.27801	0.920502	-2.47475	0.013333	0.128296	Diet_Effect	ENSMUSG00000003410	Elavl3	protein_coding	ensembl_havana	22015005	22052023
17.3685	-1.13435	0.727332	-1.5596	0.118854	0.459001	Diet_Effect	ENSMUSG00000003411	Rab3b	protein_coding	ensembl_havana	108879063	108943324
24.5456	1.76045	0.881498	1.99711	0.0458135	0.276698	Diet_Effect	ENSMUSG00000003418	St8sia6	protein_coding	ensembl_havana	13651021	13794064
5587.21	0.10519	0.0992149	1.06022	0.289045	0.685784	Diet_Effect	ENSMUSG00000003420	Fcgrt	protein_coding	ensembl_havana	45092990	45103851
2658.13	0.27629	0.110876	2.49189	0.0127064	0.124411	Diet_Effect	ENSMUSG00000003421	Nosip	protein_coding	ensembl_havana	45062429	45078210
1344.36	0.215167	0.125361	1.71638	0.086092	0.388732	Diet_Effect	ENSMUSG00000003423	Pih1d1	protein_coding	ensembl_havana	45154303	45160065
3526.28	-0.129704	0.13492	-0.961335	0.336384	0.727695	Diet_Effect	ENSMUSG00000003429	Rps11	protein_coding	ensembl_havana	45122379	45124439
5282.18	0.117334	0.115144	1.01902	0.308192	0.702765	Diet_Effect	ENSMUSG00000003435	Supt5	protein_coding	ensembl_havana	28314891	28338746
4060.36	-0.0697773	0.121666	-0.573516	0.566296	0.875724	Diet_Effect	ENSMUSG00000003437	Paf1	protein_coding	ensembl_havana	28392951	28399388
3023.19	-0.0350767	0.105078	-0.333815	0.738519	0.938703	Diet_Effect	ENSMUSG00000003438	Timm50	protein_coding	ensembl_havana	28305516	28312072
656.991	0.0139309	0.141223	0.0986451	0.92142	0.987705	Diet_Effect	ENSMUSG00000003444	Med29	protein_coding	ensembl_havana	28386146	28392708
1148.57	0.356049	0.150799	2.36108	0.0182218	0.157937	Diet_Effect	ENSMUSG00000003452	Bicd1	protein_coding	ensembl_havana	149408886	149563329
7834.82	0.117226	0.0924506	1.26799	0.204802	0.593657	Diet_Effect	ENSMUSG00000003458	Ncstn	protein_coding	ensembl_havana	172066013	172082795
5184.59	0.100181	0.0955306	1.04868	0.294327	0.691075	Diet_Effect	ENSMUSG00000003464	Pex19	protein_coding	ensembl_havana	172126755	172136493
8.03085	0.511496	1.88348	0.27157	0.785953	0.951824	Diet_Effect	ENSMUSG00000003469	Phyhip	protein_coding	ensembl_havana	70457476	70468832
5.11042	-2.03773	2.45943	-0.828539	0.407366		Diet_Effect	ENSMUSG00000003476	Crhr2	protein_coding	ensembl_havana	55090049	55133016
1212.45	-1.14563	0.156328	-7.32841	2.32904e-13	1.10044e-10	Diet_Effect	ENSMUSG00000003477	Inmt	protein_coding	ensembl_havana	55170626	55175043
3.03227	2.72926	2.18462	1.2493	0.211554		Diet_Effect	ENSMUSG00000003484	Cyp4f18	protein_coding	ensembl_havana	71988482	72009626
1524.2	-0.199369	0.117015	-1.70378	0.0884214	0.393751	Diet_Effect	ENSMUSG00000003500	Impdh1	protein_coding	ensembl_havana	29200434	29216364
3869.36	0.0246751	0.109432	0.225484	0.821603	0.96271	Diet_Effect	ENSMUSG00000003518	Dusp3	protein_coding	ensembl_havana	101971143	101987013
638.785	0.153432	0.177854	0.862683	0.388312	0.770027	Diet_Effect	ENSMUSG00000003526	Prodh	protein_coding	ensembl_havana	18060357	18090203
1531.48	0.385756	0.151548	2.54543	0.0109143	0.113726	Diet_Effect	ENSMUSG00000003527	Ess2	protein_coding	ensembl_havana	17900709	17911348
4164.56	-0.0938977	0.104531	-0.898277	0.369038	0.755922	Diet_Effect	ENSMUSG00000003528	Slc25a1	protein_coding	ensembl_havana	17925223	17928219
1378.02	0.240422	0.124952	1.92412	0.0543398	0.301784	Diet_Effect	ENSMUSG00000003531	Dgcr6	protein_coding	ensembl_havana	18052860	18071632
17041.4	0.0378402	0.0984848	0.384223	0.700813	0.926816	Diet_Effect	ENSMUSG00000003534	Ddr1	protein_coding	ensembl_havana	35681567	35704621
25143.4	-0.0705994	0.139037	-0.507773	0.611613	0.898023	Diet_Effect	ENSMUSG00000003541	Ier3	protein_coding	ensembl_havana	35821684	35822923
32796.2	0.0444809	0.155806	0.28549	0.775269	0.949039	Diet_Effect	ENSMUSG00000003545	Fosb	protein_coding	ensembl_havana	19302696	19310051
3781.71	0.0238337	0.0994486	0.239658	0.810595	0.959046	Diet_Effect	ENSMUSG00000003546	Klc4	protein_coding	ensembl_havana	46630624	46646022
961.053	0.0110372	0.120644	0.0914862	0.927106	0.988731	Diet_Effect	ENSMUSG00000003549	Ercc1	protein_coding	ensembl_havana	19344778	19356524
2.07598	1.59838	3.34682	0.477583	0.632947		Diet_Effect	ENSMUSG00000003555	Cyp17a1	protein_coding	ensembl_havana	46667165	46673172
2498.91	0.0425588	0.0940255	0.45263	0.650815	0.912041	Diet_Effect	ENSMUSG00000003559	As3mt	protein_coding	ensembl_havana	46707458	46741099
424.393	-0.0560263	0.182767	-0.306546	0.759189	0.943846	Diet_Effect	ENSMUSG00000003573	Homer3	protein_coding	ensembl_havana	70282827	70294361
1477.67	0.366965	0.130865	2.80415	0.00504494	0.0684138	Diet_Effect	ENSMUSG00000003575	Crtc1	protein_coding	ensembl_havana	70382355	70439579
318.205	-0.0301223	0.209081	-0.14407	0.885445	0.978549	Diet_Effect	ENSMUSG00000003581	Rnf215	protein_coding	ensembl_havana	4135202	4141172
38.7835	-0.2478	0.480349	-0.515875	0.605942	0.89547	Diet_Effect	ENSMUSG00000003585	Sec14l2	protein_coding	ensembl_havana	4097039	4123415
76.5811	0.243556	0.410405	0.593452	0.552879	0.869786	Diet_Effect	ENSMUSG00000003604	Aven	protein_coding	ensembl_havana	112492964	112634573
98135	-0.00536312	0.108259	-0.0495397	0.960489	0.993452	Diet_Effect	ENSMUSG00000003617	Cp	protein_coding	ensembl_havana	19957054	20009145
15744.1	0.517376	0.0842619	6.1401	8.24687e-10	1.49719e-07	Diet_Effect	ENSMUSG00000003623	Crot	protein_coding	ensembl_havana	8966033	8997324
1899.15	-0.702738	0.156356	-4.49447	6.97424e-06	0.00042414	Diet_Effect	ENSMUSG00000003644	Rps6ka1	protein_coding	ensembl_havana	133847290	133887797
4619.43	0.154273	0.102546	1.50443	0.13247	0.482124	Diet_Effect	ENSMUSG00000003660	Snrnp200	protein_coding	ensembl_havana	127208386	127240451
3954.16	0.104131	0.0927313	1.12294	0.261464	0.658017	Diet_Effect	ENSMUSG00000003662	Ciao1	protein_coding	ensembl_havana	127240938	127247816
61.9243	-3.76401	1.54949	-2.42919	0.0151324	0.139684	Diet_Effect	ENSMUSG00000003665	Has1	protein_coding	ensembl_havana	17843323	17855205
502.426	0.374416	0.159871	2.34198	0.0191817	0.162287	Diet_Effect	ENSMUSG00000003680	Taf6l	protein_coding	ensembl_havana	8774487	8786417
3437.58	-0.0488843	0.0916847	-0.533179	0.59391	0.888431	Diet_Effect	ENSMUSG00000003721	Insig2	protein_coding	ensembl_havana	121304353	121332589
1338.51	0.0506141	0.142416	0.355396	0.722293	0.934646	Diet_Effect	ENSMUSG00000003731	Kpna6	protein_coding	ensembl_havana	129643980	129672767
2612.56	-0.274314	0.195406	-1.40382	0.160373	0.528373	Diet_Effect	ENSMUSG00000003746	Man1a	protein_coding	ensembl_havana	53904785	54076609
682.322	-0.459477	0.214875	-2.13835	0.0324886	0.227199	Diet_Effect	ENSMUSG00000003752	Itpkc	protein_coding	ensembl_havana	27207172	27228661
1213.52	0.0530271	0.131616	0.402892	0.687028	0.923013	Diet_Effect	ENSMUSG00000003762	Coq8b	protein_coding	ensembl_havana	27233023	27257950
4398.46	0.270568	0.10283	2.63122	0.00850798	0.0954042	Diet_Effect	ENSMUSG00000003778	Brd8	protein_coding	ensembl_havana	34598615	34624601
109.186	2.44384	0.570273	4.28539	1.82419e-05	0.000941577	Diet_Effect	ENSMUSG00000003779	Kif20a	protein_coding	ensembl_havana	34624613	34633277
3449.73	0.143409	0.103885	1.38046	0.167445	0.541673	Diet_Effect	ENSMUSG00000003808	Farsa	protein_coding	ensembl_havana	84856989	84869257
2570.47	-0.0188025	0.09532	-0.197256	0.843627	0.968145	Diet_Effect	ENSMUSG00000003809	Gcdh	protein_coding	ensembl_havana	84886393	84893921
1832.18	-0.137278	0.138437	-0.99163	0.321378	0.71382	Diet_Effect	ENSMUSG00000003810	Mast2	protein_coding	ensembl_havana	116306762	116464183
929.644	0.136646	0.126875	1.07701	0.281476	0.679105	Diet_Effect	ENSMUSG00000003812	Dnase2a	protein_coding	ensembl_havana	84908560	84922915
3104.83	0.0556081	0.111397	0.499189	0.617646	0.899528	Diet_Effect	ENSMUSG00000003813	Rad23a	protein_coding	ensembl_havana	84834019	84840665
23883.6	0.0491148	0.0945279	0.51958	0.603356	0.894381	Diet_Effect	ENSMUSG00000003814	Calr	protein_coding	ensembl_havana	84841850	84846934
381.471	0.0657395	0.204469	0.321513	0.747822	0.941225	Diet_Effect	ENSMUSG00000003824	Syce2	protein_coding	ensembl_havana	84872111	84888221
2502.47	-0.273743	0.120745	-2.26712	0.0233826	0.184212	Diet_Effect	ENSMUSG00000003847	Nfat5	protein_coding	ensembl_havana	107293470	107379517
2142.52	-0.0466246	0.10283	-0.453414	0.65025	0.911875	Diet_Effect	ENSMUSG00000003848	Nob1	protein_coding	ensembl_havana	107412486	107425051
156.889	-0.816849	0.292291	-2.79464	0.00519571	0.0698332	Diet_Effect	ENSMUSG00000003849	Nqo1	protein_coding	ensembl_havana	107388225	107403206
35.6379	-0.735155	0.521804	-1.40887	0.158873	0.525403	Diet_Effect	ENSMUSG00000003863	Ppfia3	protein_coding	ensembl_havana	45339122	45367019
907.677	-0.0819896	0.133416	-0.614541	0.538858	0.86284	Diet_Effect	ENSMUSG00000003865	Gys1	protein_coding	ensembl_havana	45434844	45456619
2898.85	-0.0496005	0.0978746	-0.506776	0.612312	0.898548	Diet_Effect	ENSMUSG00000003868	Ruvbl2	protein_coding	ensembl_havana	45421760	45438096
7.5533	0.0319105	1.04262	0.030606	0.975584	0.997105	Diet_Effect	ENSMUSG00000003872	Lin7b	protein_coding	ensembl_havana	45367891	45370583
2166.99	-0.0149885	0.129251	-0.115964	0.907681	0.985217	Diet_Effect	ENSMUSG00000003873	Bax	protein_coding	ensembl_havana	45461697	45466898
3.41701	-0.182629	2.29368	-0.0796227	0.936537		Diet_Effect	ENSMUSG00000003882	Il7r	protein_coding	ensembl_havana	9505788	9530176
1144.95	0.0158731	0.12001	0.132265	0.894775	0.982493	Diet_Effect	ENSMUSG00000003923	Tfam	protein_coding	ensembl_havana	71225464	71238280
430.402	0.231608	0.172567	1.34213	0.179554	0.559176	Diet_Effect	ENSMUSG00000003929	Zfp81	protein_coding	ensembl_havana	33329342	33358878
40.2937	1.5572	0.699019	2.22769	0.0259013	0.196171	Diet_Effect	ENSMUSG00000003934	Efnb3	protein_coding	ensembl_havana	69554092	69560205
280.414	0.221204	0.241322	0.916638	0.359332	0.749874	Diet_Effect	ENSMUSG00000003948	Mmd	protein_coding	ensembl_havana	90249456	90278589
74.1113	0.400976	0.370806	1.08136	0.279536	0.677855	Diet_Effect	ENSMUSG00000003949	Hlf	protein_coding	ensembl_havana	90336536	90390895
1236.75	-0.077373	0.1519	-0.509366	0.610496	0.897596	Diet_Effect	ENSMUSG00000003955	Fam162a	protein_coding	ensembl_havana	36043761	36071594
9789.13	-0.0472099	0.105221	-0.448675	0.653666	0.912472	Diet_Effect	ENSMUSG00000003970	Rpl8	protein_coding	ensembl_havana	76904078	76906314
41.9249	1.0467	0.583049	1.79521	0.0726195	0.353636	Diet_Effect	ENSMUSG00000003974	Grm3	protein_coding	ensembl_havana	9485541	9725170
2104.49	0.00911441	0.146565	0.0621866	0.950414	0.992151	Diet_Effect	ENSMUSG00000003992	Ssbp2	protein_coding	ensembl_havana	91460283	91703429
561.795	0.239722	0.156367	1.53307	0.125258	0.471177	Diet_Effect	ENSMUSG00000004018	Fancl	protein_coding	ensembl_havana	26386135	26471876
5040.05	-0.0641916	0.107827	-0.595319	0.55163	0.869365	Diet_Effect	ENSMUSG00000004032	Gstm5	protein_coding	ensembl_havana	107895821	107898686
1613.1	-0.368765	0.125019	-2.94967	0.00318114	0.0494257	Diet_Effect	ENSMUSG00000004035	Gstm7	protein_coding	ensembl_havana	107926334	107931817
49.9422	-2.5417	0.703897	-3.6109	0.00030514	0.00865049	Diet_Effect	ENSMUSG00000004038	Gstm3	protein_coding	ensembl_havana	107963696	107969283
25455.2	-0.297491	0.124631	-2.38697	0.0169879	0.150934	Diet_Effect	ENSMUSG00000004040	Stat3	protein_coding	ensembl_havana	100885098	100939540
1394.4	0.0550866	0.109836	0.501534	0.615995	0.898987	Diet_Effect	ENSMUSG00000004043	Stat5a	protein_coding	ensembl_havana	100859351	100885169
11554.7	-0.495009	0.0981342	-5.04421	4.55399e-07	4.09348e-05	Diet_Effect	ENSMUSG00000004044	Cavin1	protein_coding	ensembl_havana	100956733	100970887
3011.53	0.108369	0.134378	0.806445	0.419986	0.79229	Diet_Effect	ENSMUSG00000004054	Map3k11	protein_coding	ensembl_havana	5688742	5702865
3227.63	-0.106146	0.0941471	-1.12745	0.259554	0.656	Diet_Effect	ENSMUSG00000004056	Akt2	protein_coding	ensembl_havana	27591552	27640826
4921.86	0.0758241	0.0927428	0.817574	0.4136	0.786407	Diet_Effect	ENSMUSG00000004069	Dnaja3	protein_coding	ensembl_havana	4639989	4707695
2075.43	-0.00596047	0.102187	-0.0583288	0.953487	0.992236	Diet_Effect	ENSMUSG00000004070	Hmox2	protein_coding	ensembl_havana	4726361	4766742
4751.33	-0.0763357	0.0940409	-0.811728	0.416948	0.789711	Diet_Effect	ENSMUSG00000004071	Cdip1	protein_coding	ensembl_havana	4750348	4790292
1266.6	0.203827	0.184078	1.10729	0.26817	0.665084	Diet_Effect	ENSMUSG00000004085	Map3k20	protein_coding	ensembl_havana	72285637	72442610
2913.02	0.093031	0.0945464	0.983972	0.325129	0.717675	Diet_Effect	ENSMUSG00000004096	Cwc15	protein_coding	ensembl_havana	14500617	14510577
55.5516	-0.386281	0.468422	-0.824643	0.409575	0.784046	Diet_Effect	ENSMUSG00000004098	Col5a3	protein_coding	ensembl_havana	20770050	20815067
1480.61	0.290807	0.163387	1.77986	0.0750981	0.360798	Diet_Effect	ENSMUSG00000004099	Dnmt1	protein_coding	ensembl_havana	20907209	20959888
1766.04	-0.282255	0.118926	-2.37337	0.0176266	0.15489	Diet_Effect	ENSMUSG00000004100	Ppan	protein_coding	ensembl_havana	20888175	20892178
404.685	-0.472413	0.227401	-2.07744	0.0377606	0.246568	Diet_Effect	ENSMUSG00000004105	Angptl2	protein_coding	ensembl_havana	33216069	33247717
1.20077	0.604264	3.36517	0.179564	0.857495		Diet_Effect	ENSMUSG00000004110	Cacna1e	protein_coding	ensembl_havana	154390731	154884501
1.16973	0.125725	3.32913	0.0377651	0.969875		Diet_Effect	ENSMUSG00000004113	Cacna1b	protein_coding	ensembl_havana	24603887	24763152
418.02	-0.386947	0.188664	-2.05099	0.040268	0.257463	Diet_Effect	ENSMUSG00000004127	Trmt10a	protein_coding	ensembl_havana	138143448	138159821
238.234	0.298437	0.292967	1.01867	0.308359	0.702887	Diet_Effect	ENSMUSG00000004151	Etv1	protein_coding	ensembl_havana	38779380	38870484
606.031	-0.0938049	0.224484	-0.41787	0.676042	0.919483	Diet_Effect	ENSMUSG00000004187	Kifc2	protein_coding	ensembl_havana	76659858	76668196
9442.82	0.221718	0.0996267	2.22548	0.0260487	0.196964	Diet_Effect	ENSMUSG00000004207	Psap	protein_coding	ensembl_havana	60277627	60302597
2114.59	0.233566	0.110321	2.11715	0.0342467	0.233814	Diet_Effect	ENSMUSG00000004221	Ikbkg	protein_coding	ensembl_havana	74393290	74453854
790.853	0.1883	0.195691	0.962236	0.335931	0.727065	Diet_Effect	ENSMUSG00000004233	Wars2	protein_coding	ensembl_havana	99141068	99239186
147.9	-0.183201	0.281163	-0.651581	0.514672	0.851905	Diet_Effect	ENSMUSG00000004263	Atn1	protein_coding	ensembl_havana	124742544	124756524
4767.61	-0.0276274	0.0956311	-0.288895	0.772662	0.947862	Diet_Effect	ENSMUSG00000004264	Phb2	protein_coding	ensembl_havana	124712336	124716950
1610.14	0.344009	0.131707	2.61193	0.00900334	0.0987527	Diet_Effect	ENSMUSG00000004266	Ptpn6	protein_coding	ensembl_havana	124720707	124738714
155.27	-0.468404	0.269908	-1.73542	0.0826663	0.380063	Diet_Effect	ENSMUSG00000004267	Eno2	protein_coding	ensembl_havana	124760053	124769673
4367.73	-0.107995	0.104986	-1.02865	0.303643	0.698791	Diet_Effect	ENSMUSG00000004268	Emg1	protein_coding	ensembl_havana	124704085	124712178
6713.12	0.0844759	0.100305	0.842188	0.399683	0.778822	Diet_Effect	ENSMUSG00000004270	Lpcat3	protein_coding	ensembl_havana	124663027	124704418
9654.93	-0.0867954	0.101332	-0.856542	0.391698	0.772786	Diet_Effect	ENSMUSG00000004285	Atp6v1f	protein_coding	ensembl_havana	29467718	29470512
895.158	-0.228813	0.134383	-1.70269	0.0886266	0.394284	Diet_Effect	ENSMUSG00000004317	Clcn5	protein_coding	ensembl_havana	7153810	7319358
5708.91	-0.177279	0.0916378	-1.93457	0.0530436	0.298726	Diet_Effect	ENSMUSG00000004319	Clcn3	protein_coding	ensembl_havana	60910389	60983300
37.3629	-0.447899	0.531501	-0.842706	0.399393	0.778795	Diet_Effect	ENSMUSG00000004328	Hif3a	protein_coding	ensembl_havana	17031507	17062427
137.99	-1.25455	0.448543	-2.79695	0.00515879	0.0696418	Diet_Effect	ENSMUSG00000004347	Pde1c	protein_coding	ensembl_havana	56069804	56652487
621.593	0.093528	0.144912	0.645413	0.51866	0.853873	Diet_Effect	ENSMUSG00000004356	Utp20	protein_coding	ensembl_havana	88746607	88826804
5.63504	-2.40692	1.73082	-1.39063	0.164339		Diet_Effect	ENSMUSG00000004360	9330159F19Rik	protein_coding	ensembl_havana	29211606	29230779
1777.09	-0.363659	0.136903	-2.65632	0.00789979	0.0908106	Diet_Effect	ENSMUSG00000004364	Cul3	protein_coding	ensembl_havana	80264923	80340480
15.4889	-2.19306	3.28134	-0.668344	0.503914	0.846475	Diet_Effect	ENSMUSG00000004366	Sst	protein_coding	ensembl_havana	23889573	23890958
26.8668	-1.0235	0.626218	-1.63442	0.102171	0.42353	Diet_Effect	ENSMUSG00000004371	Il11	protein_coding	ensembl_havana	4772373	4782859
289.446	0.488989	0.306517	1.59531	0.110644	0.441115	Diet_Effect	ENSMUSG00000004383	Large1	protein_coding	ensembl_havana	72814599	73353540
3538.29	-0.0511025	0.10305	-0.495902	0.619964	0.900208	Diet_Effect	ENSMUSG00000004393	Ddx56	protein_coding	ensembl_havana	6258919	6267772
8520.4	-0.0454954	0.0881115	-0.516339	0.605618	0.895428	Diet_Effect	ENSMUSG00000004394	Tmed4	protein_coding	ensembl_havana	6270369	6274870
1248.16	0.118952	0.11598	1.02563	0.305068	0.700322	Diet_Effect	ENSMUSG00000004446	Bid	protein_coding	ensembl_havana	120891930	120916853
8179.12	-0.173277	0.0845031	-2.05055	0.0403112	0.257463	Diet_Effect	ENSMUSG00000004451	Ralb	protein_coding	ensembl_havana	119470305	119504794
421.397	-0.118956	0.178871	-0.66504	0.506025	0.847182	Diet_Effect	ENSMUSG00000004455	Ppp1cc	protein_coding	ensembl_havana	122158278	122175273
3711.99	0.0409016	0.100897	0.40538	0.685198	0.922502	Diet_Effect	ENSMUSG00000004460	Dnajb11	protein_coding	ensembl_havana	22857845	22879634
944.835	0.320942	0.150166	2.13725	0.0325774	0.22754	Diet_Effect	ENSMUSG00000004462	Tbccd1	protein_coding	ensembl_havana	22813214	22857669
116.957	-0.548519	0.319522	-1.71669	0.0860365	0.388577	Diet_Effect	ENSMUSG00000004473	Clec11a	protein_coding	ensembl_havana	44302687	44306902
301.299	0.410046	0.262684	1.56099	0.118527	0.458747	Diet_Effect	ENSMUSG00000004500	Zfp324	protein_coding	ensembl_havana	12965838	12974236
401.821	-0.169363	0.226509	-0.747707	0.454637	0.814612	Diet_Effect	ENSMUSG00000004508	Gab2	protein_coding	ensembl_havana	97081586	97308946
2863.92	-0.346367	0.160591	-2.15682	0.0310197	0.220354	Diet_Effect	ENSMUSG00000004530	Coro1c	protein_coding	ensembl_havana	113842436	113908758
9778.97	-0.0699053	0.102241	-0.683733	0.494144	0.840306	Diet_Effect	ENSMUSG00000004535	Tax1bp1	protein_coding	ensembl_havana	52713729	52766780
4.97703	0.862003	1.99602	0.431861	0.665842		Diet_Effect	ENSMUSG00000004540	Psg17	protein_coding	ensembl_havana	18813937	18821607
2909.71	-1.53129	0.638624	-2.3978	0.0164939	0.147469	Diet_Effect	ENSMUSG00000004552	Ctse	protein_coding	ensembl_havana	131638306	131675505
2592.41	-0.56598	0.115507	-4.89996	9.58585e-07	7.8506e-05	Diet_Effect	ENSMUSG00000004558	Ndrg2	protein_coding	ensembl_havana	51905271	51914158
1155.02	0.288343	0.127228	2.26635	0.0234301	0.184428	Diet_Effect	ENSMUSG00000004561	Mettl17	protein_coding	ensembl_havana	51884842	51893039
1097.16	-0.00542519	0.170776	-0.0317679	0.974657	0.997105	Diet_Effect	ENSMUSG00000004562	Arhgef40	protein_coding	ensembl_havana	51984719	52006251
2785.82	0.0628515	0.11306	0.55591	0.578272	0.88128	Diet_Effect	ENSMUSG00000004565	Pnpla6	protein_coding	ensembl_havana	3515384	3544267
2602.32	0.0792323	0.123264	0.642786	0.520363	0.854229	Diet_Effect	ENSMUSG00000004567	Mcoln1	protein_coding	ensembl_havana	3500457	3515232
3074.18	-0.014994	0.114756	-0.13066	0.896044	0.98329	Diet_Effect	ENSMUSG00000004568	Arhgef18	protein_coding	ensembl_havana	3353415	3456601
2319.86	0.0032966	0.146909	0.0224397	0.982097	0.998374	Diet_Effect	ENSMUSG00000004591	Pkn2	protein_coding	ensembl_havana	142790902	142882004
527.382	0.265606	0.182176	1.45796	0.144851	0.502608	Diet_Effect	ENSMUSG00000004610	Etfb	protein_coding	ensembl_havana	43444083	43457800
7052.35	0.116207	0.0934083	1.24408	0.213471	0.603689	Diet_Effect	ENSMUSG00000004626	Stxbp2	protein_coding	ensembl_havana	3630955	3643644
7.09347	-0.78106	1.62975	-0.479252	0.631759	0.904211	Diet_Effect	ENSMUSG00000004630	Pcp2	protein_coding	ensembl_havana	3623371	3625545
2901.32	-0.00933539	0.111494	-0.0837296	0.933271	0.989196	Diet_Effect	ENSMUSG00000004631	Sgce	protein_coding	ensembl_havana	4674350	4747207
156.602	-0.668314	0.421999	-1.58368	0.113266	0.447693	Diet_Effect	ENSMUSG00000004633	Chn2	protein_coding	ensembl_havana	54039554	54301810
1434.88	0.0363268	0.11421	0.318069	0.750432	0.941656	Diet_Effect	ENSMUSG00000004637	Wwox	protein_coding	ensembl_havana	114439655	115352708
3625.39	0.0917895	0.105787	0.867685	0.385567	0.767344	Diet_Effect	ENSMUSG00000004642	Slbp	protein_coding	ensembl_havana	33634952	33652574
6.09159	-3.58845	2.04164	-1.75763	0.0788101		Diet_Effect	ENSMUSG00000004654	Ghrhr	protein_coding	ensembl_havana	55376295	55388530
2100.54	-2.46289	0.914478	-2.69322	0.00707649	0.0838036	Diet_Effect	ENSMUSG00000004655	Aqp1	protein_coding	ensembl_havana	55336432	55348555
240.699	0.203719	0.285772	0.712872	0.475925	0.828883	Diet_Effect	ENSMUSG00000004661	Arid3b	protein_coding	ensembl_havana	57790353	57836793
1969.53	-0.421107	0.153044	-2.75155	0.00593141	0.0754301	Diet_Effect	ENSMUSG00000004665	Cnn2	protein_coding	ensembl_havana	79988584	79996062
5987.5	0.0322175	0.090307	0.356756	0.721275	0.934008	Diet_Effect	ENSMUSG00000004667	Polr2e	protein_coding	ensembl_havana	80035949	80039795
20.6157	0.696839	1.09801	0.634637	0.525665	0.856888	Diet_Effect	ENSMUSG00000004668	Abca13	protein_coding	ensembl_havana	9191942	9684259
1388.2	0.110874	0.173328	0.63968	0.522381	0.855146	Diet_Effect	ENSMUSG00000004677	Myo9b	protein_coding	ensembl_havana	71272714	71360713
3.08085	-2.0237	2.42773	-0.833577	0.404519		Diet_Effect	ENSMUSG00000004698	Hdac9	protein_coding	ensembl_havana	34047580	34917095
413.559	-0.258248	0.216573	-1.19243	0.233093	0.627402	Diet_Effect	ENSMUSG00000004748	Mtfp1	protein_coding	ensembl_havana	4091480	4095445
1032.25	-0.00640072	0.149674	-0.0427643	0.965889	0.994448	Diet_Effect	ENSMUSG00000004768	Rab23	protein_coding	ensembl_havana	33719887	33742564
5882.3	-0.173188	0.0997265	-1.73663	0.0824525	0.379404	Diet_Effect	ENSMUSG00000004771	Rab11a	protein_coding	ensembl_havana	64715299	64737758
2766.66	-0.021373	0.0942564	-0.226754	0.820615	0.96271	Diet_Effect	ENSMUSG00000004788	Eif2b2	protein_coding	ensembl_havana	85219481	85226628
3839.5	0.0300764	0.102534	0.293332	0.769269	0.946649	Diet_Effect	ENSMUSG00000004789	Dlst	protein_coding	ensembl_havana	85110833	85134845
36.9533	-1.50271	0.679479	-2.21157	0.0269966	0.201159	Diet_Effect	ENSMUSG00000004791	Pgf	protein_coding	ensembl_havana	85166635	85177790
686.881	0.315728	0.188922	1.67121	0.0946796	0.406534	Diet_Effect	ENSMUSG00000004798	Ulk2	protein_coding	ensembl_havana	61775649	61855073
366.042	0.114485	0.224967	0.508896	0.610825	0.897596	Diet_Effect	ENSMUSG00000004815	Dgkq	protein_coding	ensembl_havana	108646693	108669672
7.69198	-0.545418	1.57527	-0.346238	0.729164	0.937135	Diet_Effect	ENSMUSG00000004837	Grap	protein_coding	ensembl_havana	61653265	61672784
7.76112	0.379972	1.14175	0.332798	0.739287	0.938703	Diet_Effect	ENSMUSG00000004842	Pou1f1	protein_coding	ensembl_havana	65520511	65535005
10320.8	-0.0148293	0.087612	-0.169261	0.865591	0.974394	Diet_Effect	ENSMUSG00000004843	Chmp2b	protein_coding	ensembl_havana	65539128	65562726
1981.8	0.108219	0.122886	0.880648	0.378508	0.761963	Diet_Effect	ENSMUSG00000004846	Plod3	protein_coding	ensembl_havana	136987019	136996648
2628.52	0.0926435	0.101475	0.912972	0.361257	0.751431	Diet_Effect	ENSMUSG00000004849	Ap1s1	protein_coding	ensembl_havana	137034993	137046135
3216.87	-0.481666	0.14611	-3.29659	0.000978645	0.0209448	Diet_Effect	ENSMUSG00000004864	Mapk13	protein_coding	ensembl_havana	28769297	28780233
2552.39	-0.111053	0.134597	-0.825078	0.409327	0.783898	Diet_Effect	ENSMUSG00000004865	Srpk1	protein_coding	ensembl_havana	28587648	28622709
1891.86	0.0419651	0.132557	0.316582	0.751561	0.942238	Diet_Effect	ENSMUSG00000004880	Lbr	protein_coding	ensembl_havana	181815335	181843046
7.18539	-0.368672	1.48595	-0.248105	0.804053	0.957001	Diet_Effect	ENSMUSG00000004885	Crabp2	protein_coding	ensembl_havana	87948666	87953376
56.8219	-1.14957	0.40807	-2.81709	0.0048461	0.0663934	Diet_Effect	ENSMUSG00000004891	Nes	protein_coding	ensembl_havana	87971078	87980451
345.089	-0.0254517	0.194976	-0.130538	0.896141	0.983313	Diet_Effect	ENSMUSG00000004895	Prcc	protein_coding	ensembl_havana	87858903	87885608
839.248	-0.0455855	0.156007	-0.292202	0.770133	0.946839	Diet_Effect	ENSMUSG00000004896	Rrnad1	protein_coding	ensembl_havana	87922601	87930717
4710.49	-0.112589	0.0949658	-1.18558	0.23579	0.630672	Diet_Effect	ENSMUSG00000004897	Hdgf	protein_coding	ensembl_havana	87906321	87916132
14.0509	-0.101101	0.805952	-0.125442	0.900173	0.983837	Diet_Effect	ENSMUSG00000004902	Slc25a18	protein_coding	ensembl_havana	120773578	120794336
1680.24	0.24161	0.134388	1.79785	0.0722002	0.353075	Diet_Effect	ENSMUSG00000004929	Thop1	protein_coding	ensembl_havana	81070035	81082559
2369.5	0.000138372	0.104288	0.00132682	0.998941	0.999697	Diet_Effect	ENSMUSG00000004931	Apba3	protein_coding	ensembl_havana	81266960	81273246
97.4853	-0.415152	0.360952	-1.15016	0.250078	0.647242	Diet_Effect	ENSMUSG00000004933	Matk	protein_coding	ensembl_havana	81252935	81263365
2765.61	-0.214872	0.105858	-2.02982	0.0423744	0.264219	Diet_Effect	ENSMUSG00000004934	Pias4	protein_coding	ensembl_havana	81153266	81167923
8881.39	-0.192205	0.0903835	-2.12655	0.0334579	0.231339	Diet_Effect	ENSMUSG00000004936	Map2k1	protein_coding	ensembl_havana	64185770	64253631
7134.75	0.0421835	0.0909987	0.463562	0.642962	0.908614	Diet_Effect	ENSMUSG00000004937	Sgta	protein_coding	ensembl_havana	81044075	81060181
1127.41	0.247076	0.141691	1.74377	0.0811986	0.376604	Diet_Effect	ENSMUSG00000004945	Tmem242	protein_coding	ensembl_havana	5410870	5440259
639.191	0.196788	0.142589	1.3801	0.167555	0.541673	Diet_Effect	ENSMUSG00000004947	Dtx2	protein_coding	ensembl_havana	135994800	136032872
227031	-0.58914	0.318199	-1.85149	0.0640998	0.331401	Diet_Effect	ENSMUSG00000004951	Hspb1	protein_coding	ensembl_havana	135887919	135889563
16.5705	-0.281383	1.14739	-0.245238	0.806272	0.957541	Diet_Effect	ENSMUSG00000004952	Rasa4	protein_coding	ensembl_havana	136083916	136111860
329.182	0.62623	0.260438	2.40453	0.0161935	0.14613	Diet_Effect	ENSMUSG00000004961	Syt5	protein_coding	ensembl_havana	4539765	4547541
21838.5	0.145712	0.0925887	1.57376	0.115543	0.452198	Diet_Effect	ENSMUSG00000004980	Hnrnpa2b1	protein_coding	ensembl_havana	51460932	51469894
104.772	-0.368971	0.379331	-0.97269	0.330707	0.722724	Diet_Effect	ENSMUSG00000004988	Fxyd4	protein_coding	ensembl_havana	117933559	117937692
822.514	0.211999	0.145743	1.45461	0.145779	0.504178	Diet_Effect	ENSMUSG00000004994	Ccdc130	protein_coding	ensembl_havana	84257795	84270380
1817.12	0.106645	0.109353	0.97524	0.329441	0.722263	Diet_Effect	ENSMUSG00000004996	Mri1	protein_coding	ensembl_havana	84249906	84257326
2099.44	0.166497	0.115144	1.44599	0.148181	0.508558	Diet_Effect	ENSMUSG00000005034	Prkacb	protein_coding	ensembl_havana	146729574	146812990
777.09	0.220766	0.156793	1.40801	0.159129	0.525792	Diet_Effect	ENSMUSG00000005043	Sgsh	protein_coding	ensembl_havana	119343425	119355536
5.9791	-5.39352	1.9013	-2.83676	0.00455742		Diet_Effect	ENSMUSG00000005045	Chd5	protein_coding	ensembl_havana	152338651	152390194
13398.3	-0.47596	0.12631	-3.7682	0.000164429	0.00524211	Diet_Effect	ENSMUSG00000005054	Cstb	protein_coding	ensembl_havana	78425669	78427622
17.6287	0.585678	0.701036	0.835446	0.403466	0.781108	Diet_Effect	ENSMUSG00000005057	Sh2b2	protein_coding	ensembl_havana	136218147	136246556
3209.41	-0.0598546	0.0936495	-0.639135	0.522735	0.855445	Diet_Effect	ENSMUSG00000005069	Pex5	protein_coding	ensembl_havana	124396816	124415067
2438.39	0.199277	0.111613	1.78542	0.0741935	0.357896	Diet_Effect	ENSMUSG00000005078	Jkamp	protein_coding	ensembl_havana	72085589	72101461
7353.2	-1.27802	0.352301	-3.62763	0.000286034	0.00820023	Diet_Effect	ENSMUSG00000005087	Cd44	protein_coding	ensembl_havana	102811141	102901665
128.718	-1.52089	0.425878	-3.57119	0.000355361	0.00981745	Diet_Effect	ENSMUSG00000005089	Slc1a2	protein_coding	ensembl_havana	102658659	102790784
1046.42	0.241075	0.129551	1.86084	0.0627664	0.32802	Diet_Effect	ENSMUSG00000005102	Eif2ak4	protein_coding	ensembl_havana	118388618	118475234
13077.4	-0.178644	0.0873513	-2.04512	0.0408431	0.259196	Diet_Effect	ENSMUSG00000005103	Wdr1	protein_coding	ensembl_havana	38526813	38563221
92.3638	0.427074	0.396937	1.07592	0.281961	0.679105	Diet_Effect	ENSMUSG00000005107	Slc2a9	protein_coding	ensembl_havana	38349273	38503143
12.2748	-2.98643	0.998726	-2.99024	0.00278758	0.0451377	Diet_Effect	ENSMUSG00000005124	Ccn4	protein_coding	ensembl_havana	66891320	66923201
11814.8	-0.358609	0.0951514	-3.76882	0.000164018	0.00523807	Diet_Effect	ENSMUSG00000005125	Ndrg1	protein_coding	ensembl_havana	66929318	66969640
202.556	0.420205	0.279932	1.5011	0.13333	0.483732	Diet_Effect	ENSMUSG00000005131	4930550C14Rik	protein_coding	ensembl_havana	53402325	53434402
2688.51	0.0991027	0.11987	0.826754	0.408376	0.783162	Diet_Effect	ENSMUSG00000005142	Man2b1	protein_coding	ensembl_havana	85083270	85098282
11539.7	-0.683621	0.139634	-4.89582	9.78974e-07	7.96415e-05	Diet_Effect	ENSMUSG00000005148	Klf5	protein_coding	ensembl_havana	99298691	99315036
1233.64	0.179175	0.120089	1.49203	0.135692	0.489004	Diet_Effect	ENSMUSG00000005150	Wdr83	protein_coding	ensembl_havana	85075035	85081306
12137.7	0.172649	0.103606	1.66641	0.0956325	0.408773	Diet_Effect	ENSMUSG00000005161	Prdx2	protein_coding	ensembl_havana	84969587	84974834
2864.17	0.227756	0.103782	2.19457	0.0281947	0.206087	Diet_Effect	ENSMUSG00000005198	Polr2a	protein_coding	ensembl_havana	69733997	69758637
1432.3	-0.117549	0.131888	-0.891278	0.37278	0.75769	Diet_Effect	ENSMUSG00000005204	Senp3	protein_coding	ensembl_havana	69673115	69682084
11.7087	-0.323395	1.40926	-0.229479	0.818497	0.961523	Diet_Effect	ENSMUSG00000005220	Corin	protein_coding	ensembl_havana	72300025	72504473
296.255	0.134454	0.228324	0.588872	0.555947	0.870887	Diet_Effect	ENSMUSG00000005225	Plekha8	protein_coding	ensembl_havana	54595111	54645839
126.281	1.85687	0.417522	4.44735	8.69355e-06	0.000502182	Diet_Effect	ENSMUSG00000005233	Spc25	protein_coding	ensembl_havana	69193895	69206194
170.328	0.238089	0.334315	0.71217	0.476359	0.828883	Diet_Effect	ENSMUSG00000005237	Dnah2	protein_coding	ensembl_havana	69420809	69549110
11606.1	-0.0368973	0.107271	-0.343962	0.730875	0.937354	Diet_Effect	ENSMUSG00000005251	Ripk4	protein_coding	ensembl_havana	97741933	97763787
2885.5	-0.0189429	0.0960136	-0.197294	0.843597	0.968145	Diet_Effect	ENSMUSG00000005262	Ufd1	protein_coding	ensembl_havana	18811779	18835261
224.617	0.765945	0.278087	2.75434	0.00588112	0.0751014	Diet_Effect	ENSMUSG00000005267	Zfp287	protein_coding	ensembl_havana	62700356	62731905
125.432	0.378591	0.336055	1.12657	0.259923	0.656649	Diet_Effect	ENSMUSG00000005268	Prlr	protein_coding	ensembl_havana	10177238	10349180
3039.27	0.0938451	0.143205	0.655318	0.512263	0.85097	Diet_Effect	ENSMUSG00000005299	Letm1	protein_coding	ensembl_havana	33739673	33782817
5120.52	-0.300004	0.164161	-1.8275	0.067625	0.340204	Diet_Effect	ENSMUSG00000005312	Ubqln1	protein_coding	ensembl_havana	58176156	58215653
4017.37	0.240562	0.0972892	2.47265	0.0134117	0.128784	Diet_Effect	ENSMUSG00000005320	Fgfr4	protein_coding	ensembl_havana	55152640	55168759
6859.9	0.0240687	0.0917182	0.26242	0.792997	0.954716	Diet_Effect	ENSMUSG00000005354	Txn2	protein_coding	ensembl_havana	77915047	77929006
189.565	-2.44487	1.15737	-2.11243	0.0346498	0.235172	Diet_Effect	ENSMUSG00000005355	Casp14	protein_coding	ensembl_havana	78711991	78718294
2.18289	-1.94943	3.32118	-0.586969	0.557225		Diet_Effect	ENSMUSG00000005357	Slc1a6	protein_coding	ensembl_havana	78780496	78814765
2.61965	-1.84624	2.48538	-0.742843	0.457577		Diet_Effect	ENSMUSG00000005360	Slc1a3	protein_coding	ensembl_havana	8634124	8710764
1478.51	0.0859628	0.11327	0.758918	0.447902	0.811632	Diet_Effect	ENSMUSG00000005362	Crbn	protein_coding	ensembl_havana	106780201	106800077
6.18336	-0.414795	1.50057	-0.276425	0.782222		Diet_Effect	ENSMUSG00000005364	Il5ra	protein_coding	ensembl_havana	106710357	106749037
1338.93	-0.0114365	0.123809	-0.0923724	0.926402	0.988731	Diet_Effect	ENSMUSG00000005370	Msh6	protein_coding	ensembl_havana	87975062	87990892
1387.55	-0.0331402	0.172711	-0.191882	0.847834	0.969022	Diet_Effect	ENSMUSG00000005371	Fbxo11	protein_coding	ensembl_havana	87990859	88065291
2357.36	-0.183042	0.135562	-1.35025	0.176936	0.554272	Diet_Effect	ENSMUSG00000005373	Mlxipl	protein_coding	ensembl_havana	135089890	135138382
810.084	0.149248	0.132247	1.12856	0.259085	0.65543	Diet_Effect	ENSMUSG00000005374	Tbl2	protein_coding	ensembl_havana	135149657	135165760
2291.38	0.138464	0.10128	1.36714	0.171581	0.547106	Diet_Effect	ENSMUSG00000005378	Bud23	protein_coding	ensembl_havana	135052957	135064959
193.939	-2.62435	0.296576	-8.84884	8.84348e-19	1.14047e-15	Diet_Effect	ENSMUSG00000005397	Nid1	protein_coding	ensembl_havana	13437551	13512269
690.683	1.21831	0.193008	6.31225	2.7501e-10	5.69394e-08	Diet_Effect	ENSMUSG00000005410	Mcm5	protein_coding	ensembl_havana	75109569	75128439
2333.08	-0.73907	0.188269	-3.9256	8.65122e-05	0.00321403	Diet_Effect	ENSMUSG00000005413	Hmox1	protein_coding	ensembl_havana	75093621	75100589
5056.27	-0.0775973	0.0924775	-0.839093	0.401417	0.779616	Diet_Effect	ENSMUSG00000005417	Mprip	protein_coding	ensembl_havana	59661305	59780860
2019.2	-0.0541177	0.134436	-0.402554	0.687276	0.923131	Diet_Effect	ENSMUSG00000005442	Cic	protein_coding	ensembl_havana	25267704	25294159
3194.34	0.0310755	0.107209	0.289858	0.771925	0.947652	Diet_Effect	ENSMUSG00000005447	Pafah1b3	protein_coding	ensembl_havana	25295049	25297986
7.67907	-0.813062	1.4998	-0.542113	0.587741	0.885217	Diet_Effect	ENSMUSG00000005465	Il27ra	protein_coding	ensembl_havana	84030294	84042589
1408.68	-0.0343728	0.132014	-0.260373	0.794576	0.955256	Diet_Effect	ENSMUSG00000005469	Prkaca	protein_coding	ensembl_havana	83972993	83996443
94.3073	1.37311	0.401166	3.42279	0.00061983	0.0149302	Diet_Effect	ENSMUSG00000005470	Asf1b	protein_coding	ensembl_havana	83955507	83970197
3086.14	-0.152654	0.114185	-1.33691	0.181253	0.561387	Diet_Effect	ENSMUSG00000005481	Ddx39	protein_coding	ensembl_havana	83715177	83726892
192971	-0.389346	0.363799	-1.07022	0.284519	0.68073	Diet_Effect	ENSMUSG00000005483	Dnajb1	protein_coding	ensembl_havana	83608193	83612653
7.23765	2.4103	1.36542	1.76525	0.0775218	0.365999	Diet_Effect	ENSMUSG00000005493	Msh4	protein_coding	ensembl_havana	153857149	153906138
1072.01	0.246826	0.179165	1.37765	0.168313	0.54237	Diet_Effect	ENSMUSG00000005501	Usp40	protein_coding	ensembl_havana	87945119	88008551
318.424	0.0822669	0.201052	0.409182	0.682406	0.921223	Diet_Effect	ENSMUSG00000005505	Kbtbd4	protein_coding	ensembl_havana	90904740	90911626
6142.61	-0.177557	0.137738	-1.28909	0.197366	0.58448	Diet_Effect	ENSMUSG00000005506	Celf1	protein_coding	ensembl_havana	90940382	91019497
4515.64	0.0175307	0.0984751	0.178021	0.858706	0.972291	Diet_Effect	ENSMUSG00000005510	Ndufs3	protein_coding	ensembl_havana	90894634	90904827
11650.9	-0.431748	0.106812	-4.04215	5.29644e-05	0.00214973	Diet_Effect	ENSMUSG00000005514	Por	protein_coding	ensembl_havana	135670033	135735326
2859.55	-0.347926	0.137118	-2.53742	0.0111673	0.115283	Diet_Effect	ENSMUSG00000005533	Igf1r	protein_coding	ensembl_havana	67952827	68233668
4850.44	0.0257383	0.118858	0.216546	0.828562	0.9635	Diet_Effect	ENSMUSG00000005534	Insr	protein_coding	ensembl_havana	3122061	3279617
4.74168	-3.1337	1.92911	-1.62443	0.104285		Diet_Effect	ENSMUSG00000005540	Fcer2a	protein_coding	ensembl_havana	3681737	3694175
92.2431	-3.55923	1.24048	-2.86924	0.00411456	0.0598887	Diet_Effect	ENSMUSG00000005547	Cyp2a5	protein_coding	ensembl_havana	26835305	26843548
316.617	-0.421446	0.213796	-1.97126	0.0486943	0.285761	Diet_Effect	ENSMUSG00000005553	Atp4a	protein_coding	ensembl_havana	30712209	30725534
3311.43	-0.100708	0.134451	-0.749034	0.453837	0.814299	Diet_Effect	ENSMUSG00000005566	Trim28	protein_coding	ensembl_havana	12999114	13031035
323.629	-0.153185	0.198966	-0.769907	0.441355	0.808029	Diet_Effect	ENSMUSG00000005575	Ube2m	protein_coding	ensembl_havana	13035120	13038275
399.863	-0.202609	0.239778	-0.844984	0.39812	0.777685	Diet_Effect	ENSMUSG00000005580	Adcy9	protein_coding	ensembl_havana	4287529	4420498
20.7834	-1.71434	0.849668	-2.01765	0.0436274	0.268773	Diet_Effect	ENSMUSG00000005583	Mef2c	protein_coding	ensembl_havana	83504034	83667080
3812.46	0.126979	0.146437	0.867126	0.385873	0.767456	Diet_Effect	ENSMUSG00000005609	Ctr9	protein_coding	ensembl_havana	111028951	111056377
33137.1	0.000281393	0.0831661	0.00338351	0.9973	0.999524	Diet_Effect	ENSMUSG00000005610	Eif4g2	protein_coding	ensembl_havana	111067750	111083030
27.9519	-2.50976	1.09901	-2.28366	0.0223918	0.179008	Diet_Effect	ENSMUSG00000005611	Mrvi1	protein_coding	ensembl_havana	110868266	110982461
1863.26	0.0265888	0.153393	0.173338	0.862386	0.973426	Diet_Effect	ENSMUSG00000005615	Pcyt1a	protein_coding	ensembl_havana	32430921	32475070
2736.83	-0.0974377	0.103054	-0.945498	0.344405	0.736246	Diet_Effect	ENSMUSG00000005621	Zfp592	protein_coding	ensembl_havana	80993681	81045164
7780.02	-0.122704	0.0847995	-1.44699	0.1479	0.508083	Diet_Effect	ENSMUSG00000005625	Psmd4	protein_coding	ensembl_havana	95032694	95042614
17.1812	0.386673	0.796858	0.485247	0.627501	0.902933	Diet_Effect	ENSMUSG00000005628	Tmod4	protein_coding	ensembl_havana	95124476	95129209
15.6147	-4.70302	1.34963	-3.48469	0.000492717	0.0126277	Diet_Effect	ENSMUSG00000005640	Insrr	protein_coding	ensembl_havana	87796951	87816101
8095.91	-0.0333009	0.0866648	-0.384249	0.700794	0.926816	Diet_Effect	ENSMUSG00000005656	Snx6	protein_coding	ensembl_havana	54746349	54795703
422.877	-0.97611	0.257709	-3.78764	0.000152086	0.00495141	Diet_Effect	ENSMUSG00000005667	Mthfd2	protein_coding	ensembl_havana	83305691	83325908
168.723	-0.246216	0.334932	-0.735121	0.462266	0.819797	Diet_Effect	ENSMUSG00000005672	Kit	protein_coding	ensembl_havana	75574916	75656722
436.705	-0.0172415	0.170881	-0.100898	0.919632	0.987548	Diet_Effect	ENSMUSG00000005674	Tomm40l	protein_coding	ensembl_havana	171216011	171222514
83.5577	0.599789	0.434931	1.37905	0.167881	0.542152	Diet_Effect	ENSMUSG00000005681	Apoa2	protein_coding	ensembl_havana	171225054	171226379
2394.4	0.0265907	0.105585	0.251842	0.801163	0.956274	Diet_Effect	ENSMUSG00000005682	Pan2	protein_coding	ensembl_havana	128303335	128321358
9786.66	-0.0479823	0.0912083	-0.526074	0.598837	0.891482	Diet_Effect	ENSMUSG00000005683	Cs	protein_coding	ensembl_havana	128337734	128362479
997.625	0.128582	0.155334	0.827778	0.407796	0.783137	Diet_Effect	ENSMUSG00000005686	Ampd3	protein_coding	ensembl_havana	110768206	110812405
3838.97	-0.121799	0.089426	-1.36201	0.173196	0.548866	Diet_Effect	ENSMUSG00000005687	Bcas2	protein_coding	ensembl_havana	103171655	103179166
1261.79	0.0755343	0.163319	0.462495	0.643727	0.908614	Diet_Effect	ENSMUSG00000005698	Ctcf	protein_coding	ensembl_havana	105636568	105682922
389.345	0.0977832	0.212216	0.460773	0.644962	0.90973	Diet_Effect	ENSMUSG00000005699	Pard6a	protein_coding	ensembl_havana	105701148	105703496
10.2174	0.208187	0.930996	0.223618	0.823055	0.962934	Diet_Effect	ENSMUSG00000005705	Agrp	protein_coding	ensembl_havana	105566698	105637393
212.898	0.251234	0.259889	0.966698	0.333695	0.72509	Diet_Effect	ENSMUSG00000005718	Tfap4	protein_coding	ensembl_havana	4544661	4559854
2030.35	-0.0559967	0.100226	-0.558702	0.576365	0.880945	Diet_Effect	ENSMUSG00000005732	Ranbp1	protein_coding	ensembl_havana	18239784	18248732
14.3628	-1.1109	0.950091	-1.16926	0.2423	0.638428	Diet_Effect	ENSMUSG00000005763	Cd247	protein_coding	ensembl_havana	165788681	165877277
352.629	-0.369935	0.292349	-1.26539	0.205733	0.594816	Diet_Effect	ENSMUSG00000005774	Rfx5	protein_coding	ensembl_havana	94954075	94961561
8867.29	-0.111946	0.118428	-0.945262	0.344525	0.736246	Diet_Effect	ENSMUSG00000005779	Psmb4	protein_coding	ensembl_havana	94884093	94886961
2.84045	2.32437	1.90621	1.21937	0.222704		Diet_Effect	ENSMUSG00000005800	Mmp8	protein_coding	ensembl_havana	7558456	7568485
352.949	0.0597244	0.224494	0.266041	0.790208	0.953798	Diet_Effect	ENSMUSG00000005802	Slc30a4	protein_coding	ensembl_havana	122681233	122702663
4257.23	-0.13579	0.108021	-1.25707	0.208728	0.597038	Diet_Effect	ENSMUSG00000005803	Sqor	protein_coding	ensembl_havana	122765237	122809569
1696.65	-0.0547827	0.135064	-0.405607	0.685032	0.922502	Diet_Effect	ENSMUSG00000005804	Bloc1s6	protein_coding	ensembl_havana	122738503	122749475
2859.4	-0.147623	0.106763	-1.38271	0.166752	0.5405	Diet_Effect	ENSMUSG00000005813	Metap1	protein_coding	ensembl_havana	138458956	138489515
4721.16	-0.0913228	0.0969359	-0.942095	0.346144	0.737958	Diet_Effect	ENSMUSG00000005823	Gpr108	protein_coding	ensembl_havana	57234635	57248446
3.43038	1.43129	2.95723	0.483995	0.628389		Diet_Effect	ENSMUSG00000005824	Tnfsf14	protein_coding	ensembl_havana	57189492	57194177
1972.59	0.071012	0.181578	0.391083	0.695736	0.925655	Diet_Effect	ENSMUSG00000005836	Gata6	protein_coding	ensembl_havana	11052064	11085635
4806.58	-0.051099	0.0900598	-0.567389	0.57045	0.877509	Diet_Effect	ENSMUSG00000005846	Rsl1d1	protein_coding	ensembl_havana	11192970	11203331
0.800858	0.506272	3.36539	0.150435	0.880422		Diet_Effect	ENSMUSG00000005864	Cnga2	protein_coding	ensembl_havana	71991849	72010218
1562.36	-0.0366778	0.110819	-0.330971	0.740666	0.938815	Diet_Effect	ENSMUSG00000005871	Apc	protein_coding	ensembl_havana	34220924	34322552
5026.91	-0.0535294	0.0992315	-0.53944	0.589583	0.886386	Diet_Effect	ENSMUSG00000005873	Reep5	protein_coding	ensembl_havana	34344885	34374070
10584	0.107953	0.10073	1.0717	0.283853	0.68053	Diet_Effect	ENSMUSG00000005881	Ergic3	protein_coding	ensembl_havana	156008045	156018279
3206.88	0.162903	0.100125	1.62701	0.103736	0.42622	Diet_Effect	ENSMUSG00000005882	Uqcc1	protein_coding	ensembl_havana	155846894	155930310
3119.05	0.122123	0.11074	1.10279	0.27012	0.667136	Diet_Effect	ENSMUSG00000005886	Ncoa2	protein_coding	ensembl_havana	13139105	13374083
412.083	0.137424	0.278269	0.493854	0.621409	0.900795	Diet_Effect	ENSMUSG00000005893	Nr2c2	protein_coding	ensembl_havana	92091390	92174294
1015.08	0.241542	0.125738	1.92099	0.0547327	0.302915	Diet_Effect	ENSMUSG00000005897	Nr2c1	protein_coding	ensembl_havana	94148023	94197211
1310.13	0.1639	0.139909	1.17148	0.241408	0.637795	Diet_Effect	ENSMUSG00000005899	Smpd4	protein_coding	ensembl_havana	17619354	17644828
480.08	-0.0305362	0.213648	-0.142927	0.886347	0.978711	Diet_Effect	ENSMUSG00000005907	Pex1	protein_coding	ensembl_havana	3596066	3637232
2595.41	-0.0830288	0.111575	-0.744152	0.456784	0.816529	Diet_Effect	ENSMUSG00000005936	Kctd20	protein_coding	ensembl_havana	28951950	28969549
33.9658	-0.88723	0.644881	-1.3758	0.168882	0.543199	Diet_Effect	ENSMUSG00000005947	Itgae	protein_coding	ensembl_havana	73090583	73147446
1189	0.0595764	0.149625	0.398172	0.690504	0.924175	Diet_Effect	ENSMUSG00000005949	Ctns	protein_coding	ensembl_havana	73183596	73199042
32.5644	-0.230773	0.686348	-0.336233	0.736695	0.938608	Diet_Effect	ENSMUSG00000005950	P2rx5	protein_coding	ensembl_havana	73160421	73172685
434.178	0.144592	0.189942	0.76124	0.446514	0.811065	Diet_Effect	ENSMUSG00000005951	Shpk	protein_coding	ensembl_havana	73199460	73224511
365.661	-0.934879	0.209947	-4.45293	8.47046e-06	0.000496416	Diet_Effect	ENSMUSG00000005958	Ephb3	protein_coding	ensembl_havana	21204755	21223305
16196.3	0.0209464	0.124502	0.168241	0.866393	0.97462	Diet_Effect	ENSMUSG00000005968	Tuft1	protein_coding	ensembl_havana	94612757	94658872
1800.09	0.494668	0.136203	3.63184	0.000281403	0.00808958	Diet_Effect	ENSMUSG00000005973	Rcn1	protein_coding	ensembl_havana	105386291	105399319
63.5512	0.20327	0.444535	0.457265	0.64748	0.910582	Diet_Effect	ENSMUSG00000005980	Dnase1	protein_coding	ensembl_havana	4036942	4040024
7352.79	0.0395699	0.0977428	0.404837	0.685597	0.922827	Diet_Effect	ENSMUSG00000005981	Trap1	protein_coding	ensembl_havana	4039971	4077827
1022.29	0.197993	0.131081	1.51046	0.130926	0.479948	Diet_Effect	ENSMUSG00000005982	Naa60	protein_coding	ensembl_havana	3872375	3904770
413.757	0.281075	0.201385	1.39571	0.162802	0.533458	Diet_Effect	ENSMUSG00000005983	1700037C18Rik	protein_coding	ensembl_havana	3895179	3908689
379.417	0.0222893	0.209549	0.106368	0.915291	0.987168	Diet_Effect	ENSMUSG00000005986	Ankrd13d	protein_coding	ensembl_havana	4270180	4283137
5381.54	0.0818614	0.0915917	0.893765	0.371448	0.756584	Diet_Effect	ENSMUSG00000006005	Tpr	protein_coding	ensembl_havana	150392838	150449935
2186.97	0.175248	0.14299	1.2256	0.22035	0.614001	Diet_Effect	ENSMUSG00000006010	Odr4	protein_coding	ensembl_havana	150361305	150393080
15.3623	-0.351777	0.77893	-0.451615	0.651546	0.912041	Diet_Effect	ENSMUSG00000006014	Prg4	protein_coding	ensembl_havana	150449412	150466165
924.216	0.321145	0.155555	2.06451	0.0389693	0.251961	Diet_Effect	ENSMUSG00000006019	Dhx34	protein_coding	ensembl_havana	16197147	16222037
1231.84	0.156366	0.140565	1.11241	0.265963	0.662879	Diet_Effect	ENSMUSG00000006021	Kptn	protein_coding	ensembl_havana	16119895	16127516
9134.08	-0.0405303	0.0976972	-0.414857	0.678247	0.919796	Diet_Effect	ENSMUSG00000006024	Napa	protein_coding	ensembl_havana	16098458	16117975
4739.87	-0.0411957	0.10211	-0.403444	0.686621	0.923013	Diet_Effect	ENSMUSG00000006050	Sra1	protein_coding	ensembl_havana	36666681	36670815
0.864232	0.50285	3.36661	0.149364	0.881266		Diet_Effect	ENSMUSG00000006056	Calcoco2	protein_coding	ensembl_havana	96099326	96111964
6296.55	0.0484332	0.0968211	0.500234	0.61691	0.899385	Diet_Effect	ENSMUSG00000006057	Atp5g1	protein_coding	ensembl_havana	96068852	96075670
380.057	-0.130346	0.298064	-0.437307	0.661889	0.914564	Diet_Effect	ENSMUSG00000006058	Snf8	protein_coding	ensembl_havana	96034885	96047430
3601.12	0.116509	0.102159	1.14047	0.254089	0.649569	Diet_Effect	ENSMUSG00000006095	Tbcb	protein_coding	ensembl_havana	30224131	30232272
3339.9	0.0470876	0.108543	0.433816	0.664422	0.915867	Diet_Effect	ENSMUSG00000006127	Inpp5k	protein_coding	ensembl_havana	75630988	75648871
4173.94	0.0630858	0.102645	0.614599	0.53882	0.86284	Diet_Effect	ENSMUSG00000006134	Crkl	protein_coding	ensembl_havana	17451987	17487434
1706.26	-0.346023	0.154468	-2.2401	0.0250846	0.192517	Diet_Effect	ENSMUSG00000006154	Eps8l1	protein_coding	ensembl_havana	4460674	4480487
2286.92	-0.386244	0.1629	-2.37105	0.0177375	0.155572	Diet_Effect	ENSMUSG00000006169	Clint1	protein_coding	ensembl_havana	45851964	45910625
1.45165	-1.00753	3.37989	-0.298096	0.76563		Diet_Effect	ENSMUSG00000006179	Prss16	protein_coding	ensembl_havana	22002173	22009742
1750.43	0.194847	0.104494	1.86468	0.062226	0.326828	Diet_Effect	ENSMUSG00000006191	Cdkal1	protein_coding	ensembl_havana	29191746	29855674
469.093	-0.663837	0.247703	-2.67997	0.00736281	0.0860879	Diet_Effect	ENSMUSG00000006205	Htra1	protein_coding	ensembl_havana	130936111	130985660
1739.94	0.0707676	0.128498	0.550728	0.58182	0.88225	Diet_Effect	ENSMUSG00000006215	Zbtb17	protein_coding	ensembl_havana	141444654	141467930
18.6129	-2.22804	0.904479	-2.46334	0.0137647	0.131006	Diet_Effect	ENSMUSG00000006216	Clcnkb	protein_coding	ensembl_havana	141404353	141416014
101.014	-0.224733	0.46737	-0.480846	0.630626	0.903962	Diet_Effect	ENSMUSG00000006218	Fam131c	protein_coding	ensembl_havana	141368220	141384175
3432.35	-0.126944	0.140869	-0.901148	0.367509	0.755193	Diet_Effect	ENSMUSG00000006219	Fblim1	protein_coding	ensembl_havana	141576062	141606096
4.84648	-1.69468	2.22113	-0.762982	0.445474		Diet_Effect	ENSMUSG00000006221	Hspb7	protein_coding	ensembl_havana	141420779	141425311
11.7308	-0.213156	0.8162	-0.261157	0.793971	0.955148	Diet_Effect	ENSMUSG00000006235	Epor	protein_coding	ensembl_havana	21958897	21963506
359.509	-0.00540759	0.183452	-0.0294768	0.976484	0.997522	Diet_Effect	ENSMUSG00000006241	Ccdc159	protein_coding	ensembl_havana	21927471	21935872
1600.5	-0.130987	0.121455	-1.07848	0.280818	0.678284	Diet_Effect	ENSMUSG00000006262	Mob1b	protein_coding	ensembl_havana	88720855	88764220
5.64162	-3.45304	1.9856	-1.73904	0.0820271		Diet_Effect	ENSMUSG00000006269	Atp6v1b1	protein_coding	ensembl_havana	83742990	83758855
5334.77	-0.252968	0.0986015	-2.56556	0.010301	0.108919	Diet_Effect	ENSMUSG00000006273	Atp6v1b2	protein_coding	ensembl_havana	69088646	69113711
2863.27	0.207926	0.133634	1.55594	0.119723	0.460704	Diet_Effect	ENSMUSG00000006276	Eps15l1	protein_coding	ensembl_havana	72340999	72421460
1028.07	0.180684	0.120878	1.49475	0.134979	0.487298	Diet_Effect	ENSMUSG00000006281	Tep1	protein_coding	ensembl_havana	50824059	50870560
2557.78	0.115186	0.0983653	1.17101	0.241597	0.6379	Diet_Effect	ENSMUSG00000006288	Ttc5	protein_coding	ensembl_havana	50765415	50785519
2394.83	0.0931606	0.134309	0.693627	0.487916	0.83558	Diet_Effect	ENSMUSG00000006289	Osgep	protein_coding	ensembl_havana	50906478	50924893
8986.65	0.0332995	0.0914467	0.364141	0.715752	0.932844	Diet_Effect	ENSMUSG00000006299	Aamp	protein_coding	ensembl_havana	74279840	74284738
13917	-0.426313	0.101902	-4.18356	2.86973e-05	0.00134152	Diet_Effect	ENSMUSG00000006301	Tmbim1	protein_coding	ensembl_havana	74288247	74305622
18586	-0.128012	0.0873236	-1.46595	0.142663	0.500228	Diet_Effect	ENSMUSG00000006304	Arpc2	protein_coding	ensembl_havana	74236084	74268209
855.779	-0.239383	0.146759	-1.63113	0.102864	0.424613	Diet_Effect	ENSMUSG00000006307	Kmt2b	protein_coding	ensembl_havana	30568858	30588726
138.813	0.171154	0.318482	0.537407	0.590987	0.88687	Diet_Effect	ENSMUSG00000006310	Zbtb32	protein_coding	ensembl_havana	30589681	30598909
1.26502	-1.03557	3.33632	-0.310394	0.756261		Diet_Effect	ENSMUSG00000006311	Etv2	protein_coding	ensembl_havana	30633616	30635852
29.2025	-0.141028	0.598094	-0.235795	0.813591	0.96029	Diet_Effect	ENSMUSG00000006313	Upk1a	protein_coding	ensembl_havana	30603092	30612847
5712.88	0.00638071	0.106334	0.0600062	0.952151	0.992151	Diet_Effect	ENSMUSG00000006315	Tmem147	protein_coding	ensembl_havana	30727701	30729540
17507.9	-0.00127859	0.11572	-0.011049	0.991184	0.998919	Diet_Effect	ENSMUSG00000006333	Rps9	protein_coding	ensembl_havana	3703993	3706897
937.63	0.0911595	0.14222	0.640973	0.52154	0.854968	Diet_Effect	ENSMUSG00000006335	Tfpt	protein_coding	ensembl_havana	3620324	3629929
48.4231	-0.536273	0.668662	-0.802008	0.422548	0.79452	Diet_Effect	ENSMUSG00000006342	Susd2	protein_coding	ensembl_havana	75636706	75644008
4.45852	-2.38178	2.35756	-1.01027	0.312365		Diet_Effect	ENSMUSG00000006344	Ggt5	protein_coding	ensembl_havana	75589340	75617200
1209.11	-0.134066	0.118441	-1.13192	0.257666	0.653827	Diet_Effect	ENSMUSG00000006345	Ggt1	protein_coding	ensembl_havana	75561604	75586200
15053.4	0.0498224	0.0875589	0.569016	0.569345	0.876987	Diet_Effect	ENSMUSG00000006356	Crip2	protein_coding	ensembl_havana	113140236	113145506
8445.84	-0.482367	0.160075	-3.01339	0.00258347	0.0426626	Diet_Effect	ENSMUSG00000006360	Crip1	protein_coding	ensembl_havana	113146316	113153879
672.342	-0.149017	0.177067	-0.841583	0.400021	0.778822	Diet_Effect	ENSMUSG00000006362	Cbfa2t3	protein_coding	ensembl_havana	122625141	122699109
443.947	-3.05471	0.590261	-5.17519	2.27676e-07	2.26777e-05	Diet_Effect	ENSMUSG00000006369	Fbln1	protein_coding	ensembl_havana	85205949	85286535
14307.2	-0.0210817	0.083551	-0.252322	0.800792	0.95627	Diet_Effect	ENSMUSG00000006373	Pgrmc1	protein_coding	ensembl_havana	36598206	36606079
112.396	-0.368509	0.320125	-1.15114	0.249674	0.647208	Diet_Effect	ENSMUSG00000006378	Gcat	protein_coding	ensembl_havana	79030874	79038353
26.643	-0.501798	0.74077	-0.6774	0.498152	0.842461	Diet_Effect	ENSMUSG00000006386	Tek	protein_coding	ensembl_havana	94739289	94874976
11.9544	-1.21644	1.28947	-0.943361	0.345496	0.737286	Diet_Effect	ENSMUSG00000006389	Mpl	protein_coding	ensembl_havana	118442415	118457513
6259.48	-0.0785304	0.105055	-0.747515	0.454753	0.814612	Diet_Effect	ENSMUSG00000006390	Elovl1	protein_coding	ensembl_havana	118428093	118432953
1058.47	-0.0846345	0.13295	-0.636591	0.524391	0.856493	Diet_Effect	ENSMUSG00000006392	Med8	protein_coding	ensembl_havana	118409337	118415782
913.637	0.131813	0.15929	0.827503	0.407952	0.783137	Diet_Effect	ENSMUSG00000006395	Hyi	polymorphic_pseudogene	ensembl_havana	118359990	118362744
436.865	1.22282	0.258459	4.73122	2.23175e-06	0.000158782	Diet_Effect	ENSMUSG00000006398	Cdc20	protein_coding	ensembl_havana	118432901	118437352
186.765	-1.41818	0.434918	-3.26081	0.00111096	0.0230216	Diet_Effect	ENSMUSG00000006403	Adamts4	protein_coding	ensembl_havana	171250421	171260637
1517.6	0.0487434	0.137479	0.354551	0.722926	0.935074	Diet_Effect	ENSMUSG00000006411	Nectin4	protein_coding	ensembl_havana	171370099	171388598
3087.72	-0.243281	0.10778	-2.25719	0.0239962	0.187364	Diet_Effect	ENSMUSG00000006412	Pfdn2	protein_coding	ensembl_havana	171345670	171359254
6797.94	-0.0611291	0.104624	-0.584276	0.559034	0.872583	Diet_Effect	ENSMUSG00000006418	Rnf114	protein_coding	ensembl_havana	167492645	167516173
1845.85	0.256785	0.124316	2.06557	0.038869	0.251705	Diet_Effect	ENSMUSG00000006423	C330007P06Rik	protein_coding	ensembl_havana	36823737	36874111
142.757	-1.14204	0.385569	-2.96196	0.00305683	0.048118	Diet_Effect	ENSMUSG00000006435	Neurl1a	protein_coding	ensembl_havana	47178820	47259441
2418.32	-0.44458	0.13598	-3.26945	0.00107757	0.022564	Diet_Effect	ENSMUSG00000006442	Srm	protein_coding	ensembl_havana	148591503	148594993
7941.94	-0.490685	0.131568	-3.72953	0.00019184	0.00594557	Diet_Effect	ENSMUSG00000006445	Epha2	protein_coding	ensembl_havana	141301240	141329384
1843.43	0.00599402	0.145191	0.0412837	0.96707	0.994674	Diet_Effect	ENSMUSG00000006456	Rbm14	protein_coding	ensembl_havana	4800569	4811634
3.66921	2.64811	2.83508	0.934053	0.350276		Diet_Effect	ENSMUSG00000006457	Actn3	protein_coding	ensembl_havana	4861216	4877909
6.30012	-1.47928	1.4808	-0.998979	0.317805		Diet_Effect	ENSMUSG00000006462	A530013C23Rik	lincRNA	ensembl_havana	167691177	167729172
805.602	0.162843	0.168841	0.96448	0.334805	0.726186	Diet_Effect	ENSMUSG00000006463	Zdhhc24	protein_coding	ensembl_havana	4878668	4885397
284.376	0.257084	0.245267	1.04818	0.294555	0.691418	Diet_Effect	ENSMUSG00000006464	Bbs1	protein_coding	ensembl_havana	4886878	4906628
333.115	-0.000557626	0.208859	-0.00266987	0.99787	0.999684	Diet_Effect	ENSMUSG00000006471	Ndor1	protein_coding	ensembl_havana	25244821	25256022
5334.09	0.148068	0.112539	1.31571	0.188273	0.571549	Diet_Effect	ENSMUSG00000006476	Nsmf	protein_coding	ensembl_havana	25054355	25062881
1261.24	0.230931	0.158314	1.45869	0.14465	0.502255	Diet_Effect	ENSMUSG00000006494	Pdk1	protein_coding	ensembl_havana	71873224	71903858
9047.86	0.105658	0.0900995	1.17268	0.240925	0.637771	Diet_Effect	ENSMUSG00000006498	Ptbp1	protein_coding	ensembl_havana	79854427	79864771
3436.49	-0.170943	0.126163	-1.35493	0.17544	0.55263	Diet_Effect	ENSMUSG00000006517	Mvd	protein_coding	ensembl_havana	122433601	122443422
9551.44	-0.48155	0.122714	-3.92417	8.70294e-05	0.00322674	Diet_Effect	ENSMUSG00000006519	Cyba	protein_coding	ensembl_havana	122424776	122432930
11.7878	2.93052	1.33235	2.19951	0.0278415	0.204641	Diet_Effect	ENSMUSG00000006522	Itih3	protein_coding	ensembl_havana	30908572	30923760
219.373	0.239435	0.288242	0.830675	0.406157	0.782382	Diet_Effect	ENSMUSG00000006526	Stimate	protein_coding	ensembl_havana	30825590	30877210
942.854	-0.01109	0.123025	-0.0901443	0.928173	0.988731	Diet_Effect	ENSMUSG00000006527	Sfmbt1	protein_coding	ensembl_havana	30714849	30822721
636.733	0.389421	0.191337	2.03526	0.0418249	0.262681	Diet_Effect	ENSMUSG00000006529	Itih1	protein_coding	ensembl_havana	30929180	30943289
225.937	-0.915638	0.42148	-2.17244	0.0298227	0.214355	Diet_Effect	ENSMUSG00000006538	Ihh	protein_coding	ensembl_havana	74945315	74951672
96.1965	-0.170017	0.408492	-0.416207	0.677259	0.919796	Diet_Effect	ENSMUSG00000006542	Prkag3	protein_coding	ensembl_havana	74738922	74749221
1883.46	0.218192	0.0986966	2.21073	0.0270543	0.201508	Diet_Effect	ENSMUSG00000006567	Atp7b	protein_coding	ensembl_havana	21992785	22060305
247.655	-0.0422016	0.221111	-0.190861	0.848634	0.969136	Diet_Effect	ENSMUSG00000006575	Rundc3a	protein_coding	ensembl_havana	102393403	102402555
3668.13	0.109648	0.128282	0.854739	0.392695	0.773122	Diet_Effect	ENSMUSG00000006576	Slc4a3	protein_coding	ensembl_havana	75546266	75562172
595.972	-0.0287938	0.160452	-0.179454	0.857581	0.972052	Diet_Effect	ENSMUSG00000006585	Cdt1	protein_coding	ensembl_havana	122568015	122573554
17.4448	-2.43039	0.743521	-3.26875	0.00108023	0.0225684	Diet_Effect	ENSMUSG00000006586	Runx1t1	protein_coding	ensembl_havana	13743436	13893649
37.4803	-1.03225	0.762666	-1.35347	0.175906	0.553048	Diet_Effect	ENSMUSG00000006587	Snai3	protein_coding	ensembl_havana	122454208	122460733
2971.1	-0.201454	0.120288	-1.67477	0.0939799	0.404997	Diet_Effect	ENSMUSG00000006589	Aprt	protein_coding	ensembl_havana	122574635	122576909
2171.29	-0.164074	0.102605	-1.59908	0.109802	0.438994	Diet_Effect	ENSMUSG00000006599	Gtf2h1	protein_coding	ensembl_havana	46796103	46823800
1221.84	0.102074	0.12249	0.833327	0.40466	0.781874	Diet_Effect	ENSMUSG00000006611	Hfe	protein_coding	ensembl_havana	23702034	23710854
8.67831	0.683617	0.915736	0.746522	0.455352	0.814888	Diet_Effect	ENSMUSG00000006638	Abhd1	polymorphic_pseudogene	ensembl_havana	30950066	30955091
367.963	-0.053436	0.257997	-0.207119	0.835917	0.965104	Diet_Effect	ENSMUSG00000006641	Slc5a6	protein_coding	ensembl_havana	31036036	31048924
25.1967	-1.48053	3.30799	-0.447563	0.654469	0.913008	Diet_Effect	ENSMUSG00000006642	Tcf23	protein_coding	ensembl_havana	30968662	30977018
550.839	-0.360618	0.199393	-1.80858	0.0705166	0.348741	Diet_Effect	ENSMUSG00000006651	Aplp1	protein_coding	ensembl_havana	30434982	30445535
6111.53	0.00607197	0.104941	0.0578606	0.95386	0.992321	Diet_Effect	ENSMUSG00000006673	Qrich1	protein_coding	ensembl_havana	108516806	108560163
535.977	0.288498	0.190542	1.51409	0.130002	0.478534	Diet_Effect	ENSMUSG00000006675	P4htm	protein_coding	ensembl_havana	108578862	108597667
5670.63	0.0127485	0.0926484	0.137601	0.890556	0.980966	Diet_Effect	ENSMUSG00000006676	Usp19	protein_coding	ensembl_havana	108490602	108502337
699.173	0.3563	0.155166	2.29626	0.0216612	0.175066	Diet_Effect	ENSMUSG00000006678	Pola1	protein_coding	ensembl_havana	93304767	93632155
29640.7	-0.0498314	0.0828301	-0.60161	0.547434	0.867225	Diet_Effect	ENSMUSG00000006699	Cdc42	protein_coding	ensembl_havana	137319696	137357720
2233.49	-0.261038	0.116526	-2.24018	0.0250794	0.192517	Diet_Effect	ENSMUSG00000006705	Pknox1	protein_coding	ensembl_havana	31564734	31607693
28.5434	0.961665	0.727574	1.32174	0.186254	0.568512	Diet_Effect	ENSMUSG00000006711	D130043K22Rik	protein_coding	ensembl_havana	24845135	24901270
301.855	0.12376	0.196245	0.630639	0.528276	0.85811	Diet_Effect	ENSMUSG00000006715	Gmnn	protein_coding	ensembl_havana	24751845	24761923
3042.03	-0.0750822	0.103813	-0.723246	0.469529	0.825258	Diet_Effect	ENSMUSG00000006717	Acot13	protein_coding	ensembl_havana	24817948	24831540
423.96	0.460866	0.182599	2.52393	0.0116051	0.117823	Diet_Effect	ENSMUSG00000006720	Zfp184	protein_coding	ensembl_havana	21945094	21960779
49.0228	-0.515159	0.461339	-1.11666	0.26414	0.660691	Diet_Effect	ENSMUSG00000006724	Cyp27b1	protein_coding	ensembl_havana	127048250	127053006
9321.3	0.196854	0.0939288	2.09578	0.0361014	0.240716	Diet_Effect	ENSMUSG00000006728	Cdk4	protein_coding	ensembl_havana	127063534	127067920
2460.29	0.0248355	0.113115	0.21956	0.826214	0.9635	Diet_Effect	ENSMUSG00000006731	B4galnt1	protein_coding	ensembl_havana	127165225	127172330
838.21	0.0184232	0.149131	0.123537	0.901682	0.984019	Diet_Effect	ENSMUSG00000006732	Mettl1	protein_coding	ensembl_havana	127041414	127046365
5717.69	-0.0822083	0.0942886	-0.87188	0.383274	0.765536	Diet_Effect	ENSMUSG00000006736	Tspan31	protein_coding	ensembl_havana	127067280	127070264
7926.71	-0.242549	0.0832677	-2.91288	0.00358111	0.0536933	Diet_Effect	ENSMUSG00000006740	Kif5b	protein_coding	ensembl_havana	6201002	6242174
664.286	0.00839772	0.166577	0.0504134	0.959793	0.993452	Diet_Effect	ENSMUSG00000006763	Saal1	protein_coding	ensembl_havana	46686108	46710680
16242.9	-0.306031	0.101428	-3.01721	0.00255109	0.0423123	Diet_Effect	ENSMUSG00000006777	Krt23	protein_coding	ensembl_havana	99477974	99493137
2363.24	0.209567	0.100898	2.07702	0.0377998	0.246737	Diet_Effect	ENSMUSG00000006782	Cnp	protein_coding	ensembl_havana	100574904	100591729
392.529	0.342706	0.183331	1.86933	0.0615776	0.32497	Diet_Effect	ENSMUSG00000006784	Ttc25	protein_coding	ensembl_havana	100545607	100572568
61.8445	0.672137	0.417473	1.61001	0.107395	0.434462	Diet_Effect	ENSMUSG00000006800	Sulf2	protein_coding	ensembl_havana	166073089	166155663
6552.48	-0.00188838	0.0945853	-0.0199648	0.984071	0.998474	Diet_Effect	ENSMUSG00000006818	Sod2	protein_coding	ensembl_havana	13006846	13040063
685.709	0.460581	0.152374	3.0227	0.00250529	0.0417648	Diet_Effect	ENSMUSG00000006850	Tmco6	protein_coding	ensembl_havana	36735039	36742397
1958.89	0.147975	0.105999	1.396	0.162713	0.533319	Diet_Effect	ENSMUSG00000006906	Stambp	protein_coding	ensembl_havana	83543211	83572729
3422.31	-0.101399	0.150887	-0.672019	0.501571	0.844522	Diet_Effect	ENSMUSG00000006920	Ezh1	protein_coding	ensembl_havana	101191115	101226463
295.96	0.452276	0.229205	1.97324	0.0484685	0.285301	Diet_Effect	ENSMUSG00000006930	Hap1	protein_coding	ensembl_havana	100347327	100356128
1510.08	-0.206203	0.106596	-1.93443	0.0530605	0.298726	Diet_Effect	ENSMUSG00000006931	P3h4	protein_coding	ensembl_havana	100408456	100414836
13945	0.0304523	0.139572	0.218183	0.827287	0.9635	Diet_Effect	ENSMUSG00000006932	Ctnnb1	protein_coding	ensembl_havana	120929216	120960507
2100.85	0.0718428	0.101254	0.709533	0.477993	0.829924	Diet_Effect	ENSMUSG00000006941	Eif1b	protein_coding	ensembl_havana	120492232	120495330
49.1696	-0.786471	0.506415	-1.55302	0.120419	0.461516	Diet_Effect	ENSMUSG00000006958	Chrd	protein_coding	ensembl_havana	20733127	20742384
9923.86	-0.0142703	0.0967842	-0.147445	0.882781	0.978515	Diet_Effect	ENSMUSG00000006998	Psmd2	protein_coding	ensembl_havana	20651652	20663414
18.777	-0.395615	0.901112	-0.43903	0.66064	0.914529	Diet_Effect	ENSMUSG00000007021	Syngr3	protein_coding	ensembl_havana	24685092	24689955
4841.28	0.0635512	0.124378	0.510954	0.609383	0.897108	Diet_Effect	ENSMUSG00000007029	Vars	protein_coding	ensembl_havana	35000987	35016322
201.817	0.0711343	0.233873	0.304158	0.761007	0.944379	Diet_Effect	ENSMUSG00000007030	Vwa7	protein_coding	ensembl_havana	35016579	35026741
17.7051	-1.55339	0.726336	-2.13867	0.0324623	0.227101	Diet_Effect	ENSMUSG00000007033	Hspa1l	protein_coding	ensembl_havana	34972703	34979285
7606.15	-0.174732	0.123501	-1.41482	0.157122	0.522334	Diet_Effect	ENSMUSG00000007034	Slc44a4	protein_coding	ensembl_havana	34914466	34930436
254.533	-0.202325	0.2579	-0.78451	0.432741	0.801499	Diet_Effect	ENSMUSG00000007035	Msh5	protein_coding	ensembl_havana	35028605	35046745
5568.21	0.222198	0.0890831	2.49428	0.0126214	0.123842	Diet_Effect	ENSMUSG00000007036	Abhd16a	protein_coding	ensembl_havana	35089263	35102987
3656.25	-0.364692	0.112503	-3.24161	0.00118855	0.0241471	Diet_Effect	ENSMUSG00000007038	Neu1	protein_coding	ensembl_havana	34931253	34935953
7828.92	0.233329	0.0992234	2.35155	0.0186952	0.160328	Diet_Effect	ENSMUSG00000007039	Ddah2	protein_coding	ensembl_havana	35059035	35062095
27787.7	-0.16752	0.0906595	-1.8478	0.0646316	0.332626	Diet_Effect	ENSMUSG00000007041	Clic1	protein_coding	ensembl_havana	35049966	35058749
1384.21	0.0332312	0.125779	0.264203	0.791624	0.95435	Diet_Effect	ENSMUSG00000007050	Lsm2	protein_coding	ensembl_havana	34981862	34985891
496.331	0.865737	0.245905	3.52062	0.000430535	0.0113823	Diet_Effect	ENSMUSG00000007080	Pole	protein_coding	ensembl_havana	110286306	110337474
35.7764	-1.63235	0.70005	-2.33176	0.0197133	0.16542	Diet_Effect	ENSMUSG00000007097	Atp1a2	protein_coding	ensembl_havana	172271709	172298064
8.78907	0.980851	1.15164	0.8517	0.394381	0.7741	Diet_Effect	ENSMUSG00000007107	Atp1a4	protein_coding	ensembl_havana	172223513	172258414
3.43165	0.084375	1.68072	0.0502017	0.959962		Diet_Effect	ENSMUSG00000007122	Casq1	protein_coding	ensembl_havana	172209894	172219868
846.986	-0.219111	0.149512	-1.46551	0.142782	0.500228	Diet_Effect	ENSMUSG00000007207	Stx1a	protein_coding	ensembl_havana	135023482	135051100
297.041	0.113614	0.197364	0.575657	0.564847	0.875431	Diet_Effect	ENSMUSG00000007216	Zfp775	protein_coding	ensembl_havana	48602063	48623227
13.3794	-4.01077	1.33653	-3.00089	0.00269192	0.0439162	Diet_Effect	ENSMUSG00000007279	Scube2	protein_coding	ensembl_havana	109798676	109865679
1979.55	0.0510409	0.103629	0.492537	0.62234	0.900992	Diet_Effect	ENSMUSG00000007338	Mrpl49	protein_coding	ensembl_havana	6053622	6057785
207.53	-0.337712	0.265544	-1.27177	0.203454	0.591427	Diet_Effect	ENSMUSG00000007379	Dennd2c	protein_coding	ensembl_havana	103102604	103169769
968.837	-0.0728861	0.151889	-0.479865	0.631323	0.904051	Diet_Effect	ENSMUSG00000007411	Mark3	protein_coding	ensembl_havana	111574523	111656221
2348.77	-0.0632637	0.125955	-0.502274	0.615475	0.898929	Diet_Effect	ENSMUSG00000007415	Gatad1	protein_coding	ensembl_havana	3632932	3657185
11150.6	-0.0420852	0.0841889	-0.49989	0.617153	0.899385	Diet_Effect	ENSMUSG00000007458	M6pr	protein_coding	ensembl_havana	122308720	122317680
5387.72	-0.178548	0.105434	-1.69345	0.0903689	0.39838	Diet_Effect	ENSMUSG00000007476	Lrrc8a	protein_coding	ensembl_havana	30237715	30263790
1.82618	-0.251941	3.31626	-0.0759716	0.939442		Diet_Effect	ENSMUSG00000007480	Mc5r	protein_coding	ensembl_havana	68337596	68342446
14112.8	0.0866136	0.0792458	1.09297	0.274405	0.673297	Diet_Effect	ENSMUSG00000007564	Ppp2r1a	protein_coding	ensembl_havana	20945311	20965916
1199.55	0.420438	0.137032	3.06816	0.00215379	0.0374767	Diet_Effect	ENSMUSG00000007570	Fance	protein_coding	ensembl_havana	28313519	28326572
989.003	-0.0694565	0.127319	-0.545532	0.585387	0.883974	Diet_Effect	ENSMUSG00000007589	Tinf2	protein_coding	ensembl_havana	55674689	55681820
20.2872	-0.0531165	0.762425	-0.0696678	0.944458	0.990816	Diet_Effect	ENSMUSG00000007591	Tssk4	protein_coding	ensembl_havana	55650184	55652539
1930.29	0.124572	0.111993	1.11232	0.265999	0.662879	Diet_Effect	ENSMUSG00000007603	Dus3l	protein_coding	ensembl_havana	56764757	56770093
846.05	0.263019	0.143845	1.82849	0.0674762	0.340187	Diet_Effect	ENSMUSG00000007610	Gtpbp3	protein_coding	ensembl_havana	71488103	71499583
1952.14	0.148895	0.130189	1.14369	0.252753	0.648674	Diet_Effect	ENSMUSG00000007613	Tgfbr1	protein_coding	ensembl_havana	47353222	47414931
254.781	-0.630803	0.344538	-1.83087	0.0671202	0.338949	Diet_Effect	ENSMUSG00000007617	Homer1	protein_coding	ensembl_havana	93299635	93405129
80.3604	0.897373	0.36457	2.46146	0.0138374	0.131434	Diet_Effect	ENSMUSG00000007646	Rad51c	protein_coding	ensembl_havana	87376645	87404954
11815	0.175	0.0884215	1.97916	0.0477983	0.283006	Diet_Effect	ENSMUSG00000007655	Cav1	protein_coding	ensembl_havana	17306335	17341452
5009.77	-0.114475	0.0863661	-1.32547	0.185017	0.566826	Diet_Effect	ENSMUSG00000007656	Arpp19	protein_coding	ensembl_havana	75037614	75060313
13323.9	0.0434761	0.0767257	0.566643	0.570957	0.877922	Diet_Effect	ENSMUSG00000007659	Bcl2l1	protein_coding	ensembl_havana	152780668	152831728
884.024	0.043291	0.186875	0.231658	0.816803	0.960896	Diet_Effect	ENSMUSG00000007670	Khsrp	protein_coding	ensembl_havana	57021051	57031522
9.461	-0.354441	1.18634	-0.29877	0.765116	0.945335	Diet_Effect	ENSMUSG00000007682	Dio2	protein_coding	ensembl_havana	90724552	90738438
2632.12	-0.0234923	0.0975243	-0.240887	0.809643	0.958809	Diet_Effect	ENSMUSG00000007721	Ccdc124	protein_coding	ensembl_havana	70868227	70873935
10066.8	-0.0918458	0.10079	-0.911261	0.362158	0.751863	Diet_Effect	ENSMUSG00000007739	Cct4	protein_coding	ensembl_havana	22990519	23003780
1460.71	-0.00481157	0.114156	-0.0421491	0.96638	0.994504	Diet_Effect	ENSMUSG00000007777	0610009B22Rik	protein_coding	ensembl_havana	51685386	51688874
301.439	0.337299	0.230494	1.46337	0.143365	0.500883	Diet_Effect	ENSMUSG00000007783	Cpt1c	protein_coding	ensembl_havana	44959372	44974851
6.20533	-3.53473	1.54502	-2.28782	0.022148		Diet_Effect	ENSMUSG00000007805	Twist2	protein_coding	ensembl_havana	91801461	91848028
3070.97	-0.0869714	0.120426	-0.722197	0.470173	0.825632	Diet_Effect	ENSMUSG00000007812	Zfp655	protein_coding	ensembl_havana	145231715	145247302
8400.24	0.036101	0.103186	0.349862	0.726443	0.936259	Diet_Effect	ENSMUSG00000007815	Rhoa	protein_coding	ensembl_havana	108306129	108337934
8537.3	-0.0514748	0.123713	-0.416083	0.677349	0.919796	Diet_Effect	ENSMUSG00000007817	Zmiz1	protein_coding	ensembl_havana	25459185	25666743
553.237	0.0778763	0.172757	0.450786	0.652144	0.912041	Diet_Effect	ENSMUSG00000007827	Ankrd26	protein_coding	ensembl_havana	118501308	118562226
1832.68	0.102765	0.104101	0.98716	0.323564	0.716194	Diet_Effect	ENSMUSG00000007833	Aldh16a1	protein_coding	ensembl_havana	45140684	45154584
1252.29	0.221045	0.146919	1.50453	0.132444	0.482124	Diet_Effect	ENSMUSG00000007836	Hnrnpa0	protein_coding	ensembl_havana	58125879	58128556
1316.06	0.289011	0.120738	2.3937	0.0166796	0.148696	Diet_Effect	ENSMUSG00000007837	Prrg2	protein_coding	ensembl_havana	45053584	45062677
8648.08	0.0226498	0.0953117	0.237639	0.812161	0.959523	Diet_Effect	ENSMUSG00000007850	Hnrnph1	protein_coding	ensembl_havana	50376990	50386528
2702.19	0.103581	0.100943	1.02613	0.30483	0.700124	Diet_Effect	ENSMUSG00000007867	Ift43	protein_coding	ensembl_havana	86082541	86162459
6236.21	-0.524741	0.136614	-3.84105	0.000122507	0.00418044	Diet_Effect	ENSMUSG00000007872	Id3	protein_coding	ensembl_havana	136143497	136145755
11.702	0.216618	0.900701	0.240499	0.809943	0.958809	Diet_Effect	ENSMUSG00000007877	Tcap	protein_coding	ensembl_havana	98383811	98384953
4157.35	-0.0378722	0.118372	-0.319943	0.749011	0.941272	Diet_Effect	ENSMUSG00000007880	Arid1a	protein_coding	ensembl_havana	133679008	133756769
4.97917	-3.44251	1.51463	-2.27284	0.0230358		Diet_Effect	ENSMUSG00000007888	Crlf1	protein_coding	ensembl_havana	70493158	70504081
8434.19	-0.0633862	0.0944119	-0.671379	0.501979	0.844952	Diet_Effect	ENSMUSG00000007891	Ctsd	protein_coding	ensembl_havana	142375911	142388038
9486.29	-0.112731	0.12592	-0.895259	0.370649	0.756398	Diet_Effect	ENSMUSG00000007892	Rplp1	protein_coding	ensembl_havana	61913284	61914542
279.637	0.534518	0.224133	2.38482	0.0170873	0.151598	Diet_Effect	ENSMUSG00000007908	Hmgcll1	protein_coding	ensembl_havana	76014855	76136350
2.42	-1.67729	2.81271	-0.596327	0.550957		Diet_Effect	ENSMUSG00000007944	Ttc9b	protein_coding	ensembl_havana	27653915	27657346
1.31675	-1.61594	3.30123	-0.489498	0.624489		Diet_Effect	ENSMUSG00000007946	Phox2a	protein_coding	ensembl_havana	101818313	101822726
1162.7	0.0275926	0.139355	0.198002	0.843044	0.968145	Diet_Effect	ENSMUSG00000007950	Abhd8	protein_coding	ensembl_havana	71456705	71463655
1983.94	0.1575	0.109461	1.43888	0.150186	0.512115	Diet_Effect	ENSMUSG00000007987	Ift22	protein_coding	ensembl_havana	136908150	136915404
916.366	0.295629	0.147168	2.00879	0.0445592	0.272093	Diet_Effect	ENSMUSG00000007989	Fzd3	protein_coding	ensembl_havana	65192449	65262463
10.4481	-1.2696	0.921458	-1.37782	0.16826	0.54237	Diet_Effect	ENSMUSG00000008028	1700008O03Rik	protein_coding	ensembl_havana	44360043	44385820
4178.96	0.0751108	0.109265	0.687421	0.491818	0.838573	Diet_Effect	ENSMUSG00000008035	Mid1ip1	protein_coding	ensembl_havana	10715013	10719690
3472.35	0.116544	0.120726	0.965356	0.334366	0.725942	Diet_Effect	ENSMUSG00000008036	Ap2s1	protein_coding	ensembl_havana	16738410	16749294
810.135	-0.136264	0.153794	-0.886017	0.375609	0.759835	Diet_Effect	ENSMUSG00000008090	Fgfrl1	protein_coding	ensembl_havana	108692382	108706924
59.3554	1.15923	0.618417	1.87451	0.0608607	0.322852	Diet_Effect	ENSMUSG00000008129	4930432K21Rik	protein_coding	ensembl_havana	84148025	84172590
1318.3	-1.05192	0.45579	-2.30791	0.021004	0.171789	Diet_Effect	ENSMUSG00000008136	Fhl2	protein_coding	ensembl_havana	43123074	43196984
3832.42	0.0506157	0.155966	0.32453	0.745537	0.940628	Diet_Effect	ENSMUSG00000008140	Emc10	protein_coding	ensembl_havana	44489937	44496529
407.02	-0.540924	0.236557	-2.28666	0.0222157	0.178064	Diet_Effect	ENSMUSG00000008153	Clstn3	protein_coding	ensembl_havana	124430581	124464794
1223.9	0.54731	0.129905	4.21314	2.51848e-05	0.00120228	Diet_Effect	ENSMUSG00000008167	Fbxw9	protein_coding	ensembl_havana	85060055	85067124
83.7557	-1.99844	0.417784	-4.78343	1.72332e-06	0.000131766	Diet_Effect	ENSMUSG00000008193	Spib	protein_coding	ensembl_havana	44525993	44532071
2321.1	-0.118668	0.113356	-1.04686	0.295163	0.691805	Diet_Effect	ENSMUSG00000008200	Fnbp4	protein_coding	ensembl_havana	90745370	90781021
1609.52	0.0888779	0.14385	0.617853	0.536672	0.862185	Diet_Effect	ENSMUSG00000008206	Cers4	protein_coding	ensembl_havana	4493026	4531680
837.48	-0.0728349	0.157207	-0.463305	0.643145	0.908614	Diet_Effect	ENSMUSG00000008226	Scrn3	protein_coding	ensembl_havana	73312601	73337818
1822.74	0.016413	0.131842	0.12449	0.900927	0.983941	Diet_Effect	ENSMUSG00000008301	Phax	protein_coding	ensembl_havana	56562443	56587712
445.783	0.00570835	0.247271	0.0230854	0.981582	0.998374	Diet_Effect	ENSMUSG00000008305	Tle1	protein_coding	ensembl_havana	72117142	72200919
70.8949	-0.145381	0.374608	-0.388088	0.697951	0.926289	Diet_Effect	ENSMUSG00000008307	1700109H08Rik	protein_coding	ensembl_havana	3571566	3584356
73.2943	-1.08933	0.553525	-1.96798	0.0490703	0.286962	Diet_Effect	ENSMUSG00000008318	Relt	protein_coding	ensembl_havana	100845847	100863446
1738.48	0.00643531	0.10513	0.0612128	0.95119	0.992151	Diet_Effect	ENSMUSG00000008333	Snrpb2	protein_coding	ensembl_havana	143063039	143072853
38636.7	0.206478	0.102793	2.00867	0.044572	0.272093	Diet_Effect	ENSMUSG00000008348	Ubc	protein_coding	ensembl_havana	125385965	125390202
1677.82	0.322468	0.12885	2.50266	0.0123264	0.122249	Diet_Effect	ENSMUSG00000008373	Prpf31	protein_coding	ensembl_havana	3629985	3642486
3029.05	0.0458162	0.145935	0.313949	0.75356	0.942903	Diet_Effect	ENSMUSG00000008384	Sertad1	protein_coding	ensembl_havana	27486910	27490316
10084.6	-0.0108215	0.101111	-0.107026	0.914768	0.987168	Diet_Effect	ENSMUSG00000008393	Carhsp1	protein_coding	ensembl_havana	8658580	8672155
277.062	-0.00624679	0.241517	-0.0258648	0.979365	0.997798	Diet_Effect	ENSMUSG00000008398	Elk3	protein_coding	ensembl_havana	93247414	93311135
1048.18	-0.211362	0.182311	-1.15935	0.246313	0.642891	Diet_Effect	ENSMUSG00000008429	Herpud2	protein_coding	ensembl_havana	25108132	25151820
1824	-0.0110554	0.107464	-0.102875	0.918062	0.987168	Diet_Effect	ENSMUSG00000008435	Rdh13	protein_coding	ensembl_havana	4424770	4445649
5.22111	0.874186	1.51028	0.578822	0.562709		Diet_Effect	ENSMUSG00000008438	Adam21	protein_coding	ensembl_havana	81558584	81568474
1688.74	0.0135886	0.112079	0.121241	0.9035	0.984437	Diet_Effect	ENSMUSG00000008450	Nutf2	protein_coding	ensembl_havana	105860580	105879330
22.3568	0.00909558	0.696187	0.0130648	0.989576	0.998919	Diet_Effect	ENSMUSG00000008461	Fut1	protein_coding	ensembl_havana	45617289	45621059
9306.45	-0.0472348	0.0860659	-0.548822	0.583128	0.882905	Diet_Effect	ENSMUSG00000008475	Arpc5	protein_coding	ensembl_havana	152766542	152775597
54.8464	-2.21559	0.677753	-3.26903	0.00107918	0.0225684	Diet_Effect	ENSMUSG00000008496	Pou2f2	protein_coding	ensembl_havana	25087344	25179726
29724	0.0471554	0.0891464	0.528966	0.596829	0.890363	Diet_Effect	ENSMUSG00000008540	Mgst1	protein_coding	ensembl_havana	138140316	138156755
15235.1	0.167425	0.103146	1.62319	0.104549	0.427928	Diet_Effect	ENSMUSG00000008575	Nfib	protein_coding	ensembl_havana	82290173	82705750
5493.85	-0.15751	0.0971045	-1.62207	0.104788	0.428525	Diet_Effect	ENSMUSG00000008601	Rab25	protein_coding	ensembl_havana	88542029	88548300
2679.51	0.0670268	0.111674	0.600199	0.548374	0.867577	Diet_Effect	ENSMUSG00000008604	Ubqln4	protein_coding	ensembl_havana	88553758	88569725
1.66632	0.252716	3.29556	0.0766838	0.938875		Diet_Effect	ENSMUSG00000008658	Rbfox1	protein_coding	ensembl_havana	5885355	7411526
11454.8	-0.17023	0.13162	-1.29334	0.195893	0.581839	Diet_Effect	ENSMUSG00000008668	Rps18	protein_coding	ensembl_havana	33951999	33956001
18402.6	-0.162861	0.108041	-1.50741	0.131706	0.481309	Diet_Effect	ENSMUSG00000008682	Rpl10	protein_coding	ensembl_havana	74270812	74273135
4400.4	-0.163976	0.151734	-1.08068	0.27984	0.677855	Diet_Effect	ENSMUSG00000008683	Rps15a	protein_coding	ensembl_havana	118104372	118116188
5383.23	0.128531	0.0874815	1.46924	0.141769	0.498991	Diet_Effect	ENSMUSG00000008690	Ncaph2	protein_coding	ensembl_havana	89355719	89372826
3051.66	-0.0456626	0.128593	-0.355095	0.722518	0.934766	Diet_Effect	ENSMUSG00000008730	Hipk1	protein_coding	ensembl_havana	103739815	103791563
439.125	-0.14067	0.176959	-0.794934	0.426652	0.797328	Diet_Effect	ENSMUSG00000008734	Gprc5b	protein_coding	ensembl_havana	118972047	118995211
2702.32	-0.119166	0.122058	-0.976304	0.328914	0.72173	Diet_Effect	ENSMUSG00000008763	Man1a2	protein_coding	ensembl_havana	100562208	100685503
651.428	0.179108	0.15836	1.13102	0.258049	0.654184	Diet_Effect	ENSMUSG00000008822	Acyp1	protein_coding	ensembl_havana	85272398	85288438
7386.5	0.267202	0.090214	2.96187	0.00305781	0.048118	Diet_Effect	ENSMUSG00000008855	Hdac5	protein_coding	ensembl_havana	102194432	102230166
3292.24	-0.117368	0.0908217	-1.29229	0.196256	0.582448	Diet_Effect	ENSMUSG00000008859	Rala	protein_coding	ensembl_havana	17880571	17944239
5368.72	-0.00996048	0.0907893	-0.10971	0.91264	0.98681	Diet_Effect	ENSMUSG00000008892	Vdac3	protein_coding	ensembl_havana	22577075	22593813
4506.38	0.138202	0.0990935	1.39466	0.163118	0.533886	Diet_Effect	ENSMUSG00000008958	Vps72	protein_coding	ensembl_havana	95111022	95123051
2213.8	0.0520003	0.118896	0.437361	0.66185	0.914564	Diet_Effect	ENSMUSG00000008976	Gabpa	protein_coding	ensembl_havana	84834925	84863779
1078.68	-0.0483589	0.124033	-0.389887	0.69662	0.92603	Diet_Effect	ENSMUSG00000008999	Bmp7	protein_coding	ensembl_havana	172868012	172940321
6256.96	0.0532295	0.113121	0.470554	0.637959	0.906724	Diet_Effect	ENSMUSG00000009013	Dynll1	protein_coding	ensembl_havana	115297110	115300999
2347.42	0.343557	0.116749	2.9427	0.00325365	0.0502136	Diet_Effect	ENSMUSG00000009030	Pdcl	protein_coding	ensembl_havana	37350074	37359332
5250.72	-0.0423389	0.106188	-0.398714	0.690104	0.924175	Diet_Effect	ENSMUSG00000009035	Tmem184b	protein_coding	ensembl_havana	79360684	79403569
4.27015	0.307065	1.79916	0.170672	0.864482		Diet_Effect	ENSMUSG00000009070	Rsph14	protein_coding	ensembl_havana	74957477	75032586
2137.94	0.134253	0.144158	0.931293	0.351702	0.742362	Diet_Effect	ENSMUSG00000009073	Nf2	protein_coding	ensembl_havana	4765845	4849536
1.07595	-1.67173	3.32067	-0.503433	0.61466		Diet_Effect	ENSMUSG00000009075	Cabp7	protein_coding	ensembl_havana	4736892	4746778
857.32	-0.011872	0.143979	-0.0824567	0.934284	0.98928	Diet_Effect	ENSMUSG00000009076	Zmat5	protein_coding	ensembl_havana	4704678	4737669
14752.7	0.11241	0.0918292	1.22412	0.220906	0.614329	Diet_Effect	ENSMUSG00000009079	Ewsr1	protein_coding	ensembl_havana	5069689	5099266
4523.41	0.129886	0.105031	1.23664	0.21622	0.607637	Diet_Effect	ENSMUSG00000009090	Ap1b1	protein_coding	ensembl_havana	4986824	5042791
18.9996	0.381785	0.73396	0.520171	0.602944	0.894345	Diet_Effect	ENSMUSG00000009092	Derl3	protein_coding	ensembl_havana	75893413	75895941
4.19443	-0.987424	1.68353	-0.586519	0.557527		Diet_Effect	ENSMUSG00000009093	Gstt4	protein_coding	ensembl_havana	75814943	75822543
61.976	0.071518	0.444495	0.160897	0.872175	0.976282	Diet_Effect	ENSMUSG00000009097	Tbx1	protein_coding	ensembl_havana	18580979	18590671
24.0001	-0.0195129	0.954034	-0.0204531	0.983682	0.998474	Diet_Effect	ENSMUSG00000009108	Gnat2	protein_coding	ensembl_havana	108092789	108101432
1702.08	-0.0593887	0.132167	-0.449344	0.653183	0.912387	Diet_Effect	ENSMUSG00000009112	Bcl2l13	protein_coding	ensembl_havana	120836212	120892842
38.5155	-0.0302873	0.582356	-0.0520082	0.958522	0.993443	Diet_Effect	ENSMUSG00000009114	2610028H24Rik	protein_coding	ensembl_havana	76449081	76461110
4.02688	-0.68193	1.36423	-0.499865	0.61717		Diet_Effect	ENSMUSG00000009115	Spatc1l	protein_coding	ensembl_havana	76562272	76570201
154.422	-0.768397	0.319686	-2.4036	0.0162347	0.146358	Diet_Effect	ENSMUSG00000009145	Dqx1	protein_coding	ensembl_havana	83057844	83067318
1.70124	-3.89082	3.28777	-1.18342	0.236642		Diet_Effect	ENSMUSG00000009185	Ccl8	protein_coding	ensembl_havana	82115185	82116799
481.601	0.270261	0.185557	1.45649	0.145258	0.502951	Diet_Effect	ENSMUSG00000009207	Lnpk	protein_coding	ensembl_havana	74520291	74579435
206.645	-0.34608	0.253663	-1.36433	0.172464	0.548012	Diet_Effect	ENSMUSG00000009210	Prr29	protein_coding	ensembl_havana	106365472	106377558
2.51598	0.0815098	3.31719	0.024572	0.980396		Diet_Effect	ENSMUSG00000009214	Mymk	protein_coding	ensembl_havana	27061636	27072179
149.885	-1.32387	0.444148	-2.9807	0.0028759	0.0462024	Diet_Effect	ENSMUSG00000009246	Trpm5	protein_coding	ensembl_havana	143069153	143094642
27.0573	-0.172258	0.591528	-0.291208	0.770892	0.947079	Diet_Effect	ENSMUSG00000009248	Ascl2	protein_coding	ensembl_havana	142966829	142969264
178.188	-1.08082	0.271526	-3.98056	6.87543e-05	0.00266594	Diet_Effect	ENSMUSG00000009281	Rarres2	protein_coding	ensembl_havana	48569696	48572789
16589.7	-0.219752	0.0839832	-2.61662	0.00888057	0.0981613	Diet_Effect	ENSMUSG00000009291	Pttg1ip	protein_coding	ensembl_havana	77581720	77598732
18.6946	-1.32717	0.99459	-1.33439	0.182077	0.562426	Diet_Effect	ENSMUSG00000009292	Trpm2	protein_coding	ensembl_havana	77907722	77970563
5955.16	-0.392137	0.13116	-2.98977	0.00279191	0.0451681	Diet_Effect	ENSMUSG00000009293	Ube2g2	protein_coding	ensembl_havana	77622275	77645993
6392.43	-0.215692	0.0996312	-2.16491	0.0303949	0.217088	Diet_Effect	ENSMUSG00000009376	Met	protein_coding	ensembl_havana	17463800	17573980
5460.91	0.351882	0.11091	3.17267	0.00151043	0.0289322	Diet_Effect	ENSMUSG00000009378	Slc16a12	protein_coding	ensembl_havana	34668403	34747289
2.40056	-0.936676	2.86471	-0.326971	0.74369		Diet_Effect	ENSMUSG00000009394	Syn2	protein_coding	ensembl_havana	115134902	115282006
449.176	0.22071	0.18534	1.19084	0.233718	0.628077	Diet_Effect	ENSMUSG00000009406	Elk1	protein_coding	ensembl_havana	20933395	20950608
111.009	-0.300276	0.466397	-0.64382	0.519692	0.854088	Diet_Effect	ENSMUSG00000009418	Nav1	protein_coding	ensembl_havana	135434580	135688105
5975.57	0.102057	0.091057	1.1208	0.262373	0.658864	Diet_Effect	ENSMUSG00000009470	Tnpo1	protein_coding	ensembl_havana	98839019	98926384
1046.12	0.140559	0.149845	0.938027	0.34823	0.739949	Diet_Effect	ENSMUSG00000009535	Rnmt	protein_coding	ensembl_havana	68300355	68324852
7612.33	-0.231508	0.149356	-1.55004	0.121131	0.462584	Diet_Effect	ENSMUSG00000009545	Kcnq1	protein_coding	ensembl_havana	143106362	143427042
3542.53	-0.0103084	0.100013	-0.103071	0.917907	0.987168	Diet_Effect	ENSMUSG00000009549	Srp14	protein_coding	ensembl_havana	118475850	118479711
1.50889	-0.579418	2.53249	-0.228794	0.819029		Diet_Effect	ENSMUSG00000009551	6330409D20Rik	protein_coding	ensembl_havana	32732620	32741016
887.979	-0.10925	0.164775	-0.663023	0.507316	0.847725	Diet_Effect	ENSMUSG00000009555	Cdk9	protein_coding	ensembl_havana	32705784	32713076
2142.88	0.126446	0.110181	1.14761	0.251128	0.647623	Diet_Effect	ENSMUSG00000009563	Tor2a	protein_coding	ensembl_havana	32757234	32762244
1296.62	0.289936	0.132936	2.18102	0.0291822	0.211542	Diet_Effect	ENSMUSG00000009566	Fpgs	protein_coding	ensembl_havana	32682609	32704145
2696.2	0.181276	0.111673	1.62327	0.104532	0.427928	Diet_Effect	ENSMUSG00000009569	Mrtfb	protein_coding	ensembl_havana	13256481	13417529
5959.34	0.0942887	0.100412	0.939019	0.347721	0.73955	Diet_Effect	ENSMUSG00000009575	Cbx5	protein_coding	ensembl_havana	103191544	103239816
5797.73	0.173247	0.0922911	1.87718	0.0604934	0.321428	Diet_Effect	ENSMUSG00000009585	Apobec3	protein_coding	ensembl_havana	79891659	79915906
1688.22	0.356684	0.167795	2.12571	0.0335274	0.231355	Diet_Effect	ENSMUSG00000009614	Sardh	protein_coding	ensembl_havana	27188393	27248337
1228.37	-0.0423235	0.151911	-0.278607	0.780547	0.949727	Diet_Effect	ENSMUSG00000009621	Vav2	protein_coding	ensembl_havana	27262104	27427033
12.5999	-2.05667	1.03088	-1.99506	0.0460358	0.277495	Diet_Effect	ENSMUSG00000009628	Tex15	protein_coding	ensembl_havana	33516738	33585582
693.169	-0.386409	0.215212	-1.79548	0.072577	0.353629	Diet_Effect	ENSMUSG00000009630	Ppp2cb	protein_coding	ensembl_havana	33599625	33619441
1327.51	-0.259651	0.138499	-1.87475	0.0608274	0.32283	Diet_Effect	ENSMUSG00000009633	G0s2	protein_coding	ensembl_havana	193272161	193273217
1401.16	0.277821	0.115558	2.40417	0.0162092	0.1462	Diet_Effect	ENSMUSG00000009640	Dmap1	protein_coding	ensembl_havana	117674681	117682273
43.1746	1.00067	0.492804	2.03056	0.0423	0.264134	Diet_Effect	ENSMUSG00000009646	Pla2g12b	protein_coding	ensembl_havana	59403660	59421976
3403.11	0.0124106	0.0966284	0.128436	0.897804	0.983506	Diet_Effect	ENSMUSG00000009647	Mcu	protein_coding	ensembl_havana	59446984	59616692
13.2752	0.48812	1.11519	0.437703	0.661601	0.914564	Diet_Effect	ENSMUSG00000009654	Oit3	protein_coding	ensembl_havana	59422958	59441778
10.6584	-1.28551	1.39925	-0.918713	0.358246	0.748967	Diet_Effect	ENSMUSG00000009670	Tex11	protein_coding	ensembl_havana	100838648	101059667
1633.14	-0.191211	0.161231	-1.18595	0.235644	0.630672	Diet_Effect	ENSMUSG00000009681	Bcr	protein_coding	ensembl_havana	75060592	75184921
64.4858	-0.983474	0.446683	-2.20173	0.0276847	0.204059	Diet_Effect	ENSMUSG00000009687	Fxyd5	protein_coding	ensembl_havana	31032722	31042481
83.6334	-0.0605701	0.559859	-0.108188	0.913847	0.986956	Diet_Effect	ENSMUSG00000009731	Kcnd1	protein_coding	ensembl_havana	7822289	7838280
907.81	0.238442	0.130843	1.82235	0.0684017	0.342883	Diet_Effect	ENSMUSG00000009733	Tfcp2	protein_coding	ensembl_havana	100498012	100552008
495.249	0.0213173	0.211995	0.100556	0.919903	0.987548	Diet_Effect	ENSMUSG00000009739	Pou6f1	protein_coding	ensembl_havana	100575318	100599984
649.151	-0.12208	0.147207	-0.829308	0.40693	0.782724	Diet_Effect	ENSMUSG00000009741	Ubp1	protein_coding	ensembl_havana	113930934	113977202
3409.39	-0.0132354	0.119682	-0.110588	0.911943	0.986462	Diet_Effect	ENSMUSG00000009772	Nuak2	protein_coding	ensembl_havana	132316126	132333488
1489.88	-0.135726	0.121603	-1.11614	0.264362	0.660709	Diet_Effect	ENSMUSG00000009828	Cilk1	protein_coding	ensembl_havana	78109192	78172107
6960.47	-0.0551226	0.106381	-0.518162	0.604345	0.894708	Diet_Effect	ENSMUSG00000009863	Sdhb	protein_coding	ensembl_havana	140961203	140979193
27.9056	-1.05608	0.566714	-1.86351	0.0623909	0.327077	Diet_Effect	ENSMUSG00000009876	Cox4i2	protein_coding	ensembl_havana	152754173	152765037
3757.81	-0.0158797	0.0985616	-0.161115	0.872003	0.976282	Diet_Effect	ENSMUSG00000009894	Snap47	protein_coding	ensembl_havana	59407134	59451186
1.49518	0.461249	3.36663	0.137006	0.891026		Diet_Effect	ENSMUSG00000009900	Wnt3a	protein_coding	ensembl_havana	59248033	59290752
1757.74	-0.0244452	0.11734	-0.208329	0.834972	0.964762	Diet_Effect	ENSMUSG00000009905	Kdsr	protein_coding	ensembl_havana	106720459	106759727
5509.34	0.00727193	0.0959333	0.0758019	0.939577	0.990357	Diet_Effect	ENSMUSG00000009907	Vps4b	protein_coding	ensembl_havana	106764071	106796728
9021.3	-0.123467	0.107053	-1.15332	0.248777	0.645889	Diet_Effect	ENSMUSG00000009927	Rps25	protein_coding	ensembl_havana	44407139	44410427
8.63065	2.12191	1.44975	1.46364	0.143292	0.500746	Diet_Effect	ENSMUSG00000009941	Nxf2	protein_coding	ensembl_havana	134944526	134964754
3646.52	0.0905789	0.099804	0.907567	0.364107	0.752512	Diet_Effect	ENSMUSG00000009995	Taz	protein_coding	ensembl_havana	74281912	74290151
58.3502	0.0259576	0.531528	0.0488358	0.96105	0.993452	Diet_Effect	ENSMUSG00000010021	Kif19a	protein_coding	ensembl_havana	114765388	114790739
7207.36	0.181455	0.11222	1.61695	0.105888	0.431109	Diet_Effect	ENSMUSG00000010025	Aldh3a2	protein_coding	ensembl_havana	61223417	61267464
75.5247	0.0491054	0.367417	0.13365	0.893679	0.982018	Diet_Effect	ENSMUSG00000010044	Zmynd10	protein_coding	ensembl_havana	107547298	107551319
2596.89	0.0171045	0.104847	0.163138	0.87041	0.976282	Diet_Effect	ENSMUSG00000010045	Tmem115	protein_coding	ensembl_havana	107533945	107538673
3073.84	0.0275068	0.0974126	0.282374	0.777657	0.949496	Diet_Effect	ENSMUSG00000010047	Hyal2	protein_coding	ensembl_havana	107567945	107572779
1278.43	-0.185764	0.129763	-1.43156	0.15227	0.51559	Diet_Effect	ENSMUSG00000010048	Ifrd2	protein_coding	ensembl_havana	107587642	107593385
982.252	-0.216821	0.148401	-1.46105	0.144003	0.501709	Diet_Effect	ENSMUSG00000010051	Hyal1	protein_coding	ensembl_havana	107576927	107581710
1819.27	-0.215434	0.108308	-1.98909	0.0466908	0.279341	Diet_Effect	ENSMUSG00000010054	Tusc2	protein_coding	ensembl_havana	107563255	107566112
1480.68	-0.00262226	0.113769	-0.0230489	0.981611	0.998374	Diet_Effect	ENSMUSG00000010057	Nprl2	protein_coding	ensembl_havana	107542226	107545706
501.812	-0.300002	0.161081	-1.86243	0.0625428	0.327222	Diet_Effect	ENSMUSG00000010064	Slc38a3	protein_coding	ensembl_havana	107650634	107669530
3.80844	0.196835	2.27259	0.0866126	0.930979		Diet_Effect	ENSMUSG00000010066	Cacna2d2	protein_coding	ensembl_havana	107399612	107529343
3103.86	0.134282	0.162002	0.828893	0.407165	0.782931	Diet_Effect	ENSMUSG00000010067	Rassf1	protein_coding	ensembl_havana	107551555	107562267
8137.71	-0.147414	0.120049	-1.22794	0.219468	0.612782	Diet_Effect	ENSMUSG00000010080	Epn3	protein_coding	ensembl_havana	94489599	94499974
9767.09	-0.320232	0.0854379	-3.74812	0.000178165	0.00559292	Diet_Effect	ENSMUSG00000010095	Slc3a2	protein_coding	ensembl_havana	8706882	8723369
7047.29	-0.0124589	0.0928122	-0.134237	0.893215	0.981939	Diet_Effect	ENSMUSG00000010097	Nxf1	protein_coding	ensembl_havana	8757073	8770922
5656.15	-0.171887	0.110142	-1.5606	0.118619	0.459001	Diet_Effect	ENSMUSG00000010110	Stx5a	protein_coding	ensembl_havana	8741413	8756069
2.75381	3.8367	3.32127	1.15519	0.248012		Diet_Effect	ENSMUSG00000010122	Slc47a1	protein_coding	ensembl_havana	61343401	61378345
54.2759	-0.107975	0.501086	-0.215481	0.829392	0.9635	Diet_Effect	ENSMUSG00000010136	Pifo	protein_coding	ensembl_havana	105996957	106014646
6.08649	-3.46271	1.73768	-1.99272	0.0462926		Diet_Effect	ENSMUSG00000010142	Tnfrsf13b	protein_coding	ensembl_havana	61126755	61149372
101.453	0.260963	0.383839	0.679876	0.496583	0.841692	Diet_Effect	ENSMUSG00000010154	Spire2	protein_coding	ensembl_havana	123332713	123369515
8869.1	0.207167	0.105244	1.96845	0.0490165	0.286739	Diet_Effect	ENSMUSG00000010175	Prox1	protein_coding	ensembl_havana	190118035	190170714
5175.67	-0.070333	0.0922213	-0.762654	0.44567	0.811065	Diet_Effect	ENSMUSG00000010277	2610507B11Rik	protein_coding	ensembl_havana	78261752	78290623
1236.01	0.397051	0.154194	2.57501	0.0100238	0.106954	Diet_Effect	ENSMUSG00000010290	AI597479	protein_coding	ensembl_havana	43098710	43115947
540.016	0.442054	0.188995	2.33897	0.0193371	0.163376	Diet_Effect	ENSMUSG00000010307	Tmem86a	protein_coding	ensembl_havana	47050601	47054777
11.5526	-0.0384078	1.1214	-0.03425	0.972678	0.996744	Diet_Effect	ENSMUSG00000010311	Optc	protein_coding	ensembl_havana	133897199	133907999
5.34774	-0.000767481	1.34987	-0.000568561	0.999546		Diet_Effect	ENSMUSG00000010342	Tex14	protein_coding	ensembl_havana	87405065	87555823
1866.88	-0.0642012	0.113996	-0.563189	0.573306	0.879407	Diet_Effect	ENSMUSG00000010358	Ifi35	protein_coding	ensembl_havana	101448407	101458698
883.873	-0.187829	0.143775	-1.30641	0.191413	0.576238	Diet_Effect	ENSMUSG00000010362	Rdm1	protein_coding	ensembl_havana	101627195	101636100
5469.71	0.0472745	0.0939695	0.503084	0.614905	0.898929	Diet_Effect	ENSMUSG00000010376	Nedd8	protein_coding	ensembl_havana	55662263	55672124
2597.16	0.127213	0.110449	1.15178	0.249411	0.646946	Diet_Effect	ENSMUSG00000010392	Gosr1	protein_coding	ensembl_havana	76726602	76763579
1597.04	-0.226891	0.1195	-1.89867	0.0576076	0.312308	Diet_Effect	ENSMUSG00000010406	Mrpl52	protein_coding	ensembl_havana	54426909	54429756
40.9014	-0.298148	0.47247	-0.631041	0.528014	0.858075	Diet_Effect	ENSMUSG00000010435	Spaca7	protein_coding	ensembl_havana	12573029	12600744
3321.25	0.00955521	0.120762	0.0791243	0.936934	0.989672	Diet_Effect	ENSMUSG00000010453	Kansl3	protein_coding	ensembl_havana	36335730	36369181
21.4487	0.302163	0.893185	0.338298	0.735138	0.938242	Diet_Effect	ENSMUSG00000010461	Eya4	protein_coding	ensembl_havana	23102963	23350786
16.7067	0.61057	0.797737	0.765378	0.444046	0.809979	Diet_Effect	ENSMUSG00000010492	Uckl1os	antisense	havana	181578480	181585170
1721.92	0.0484616	0.186149	0.260337	0.794604	0.955256	Diet_Effect	ENSMUSG00000010517	Faf1	protein_coding	ensembl_havana	109676588	109963960
1.14487	0.859282	3.30588	0.259926	0.794921		Diet_Effect	ENSMUSG00000010529	Gm266	protein_coding	ensembl_havana	111484609	111485823
49.3375	0.194174	0.44466	0.436679	0.662344	0.914789	Diet_Effect	ENSMUSG00000010538	Tsacc	protein_coding	ensembl_havana	88282757	88296999
1984.03	0.0179584	0.111602	0.160914	0.872161	0.976282	Diet_Effect	ENSMUSG00000010554	Mettl16	protein_coding	ensembl_havana	74770830	74828525
4.96964	-4.06928	1.74558	-2.33119	0.0197433		Diet_Effect	ENSMUSG00000010592	Dazl	protein_coding	ensembl_havana	50279395	50293636
2.51343	-0.150164	3.31716	-0.0452688	0.963893		Diet_Effect	ENSMUSG00000010601	Apol7a	protein_coding	ensembl_havana	77388219	77399110
2567.9	-0.0789806	0.127506	-0.619428	0.535635	0.861747	Diet_Effect	ENSMUSG00000010607	Pigyl	protein_coding	ensembl_havana	22156846	22158358
5198.12	-0.0128634	0.113947	-0.11289	0.910118	0.986268	Diet_Effect	ENSMUSG00000010608	Rbm25	protein_coding	ensembl_havana	83631236	83683123
2003.5	-0.122344	0.128192	-0.954381	0.339891	0.730728	Diet_Effect	ENSMUSG00000010609	Psen2	protein_coding	ensembl_havana	180227004	180263438
475.737	-0.00505333	0.161671	-0.0312569	0.975065	0.997105	Diet_Effect	ENSMUSG00000010651	Acaa1b	protein_coding	ensembl_havana	119148023	119157093
1194.83	-0.123498	0.119309	-1.03511	0.300619	0.697074	Diet_Effect	ENSMUSG00000010660	Plcd1	protein_coding	ensembl_havana	119071527	119093502
8102.07	-0.193915	0.116127	-1.66986	0.0949474	0.407072	Diet_Effect	ENSMUSG00000010663	Fads1	protein_coding	ensembl_havana	10182888	10196877
1074.56	0.265961	0.127012	2.09398	0.0362618	0.241226	Diet_Effect	ENSMUSG00000010721	Lmbr1	protein_coding	ensembl_havana	29229802	29378390
69.1173	-0.213092	0.419256	-0.508263	0.611269	0.897815	Diet_Effect	ENSMUSG00000010751	Tnfrsf22	protein_coding	ensembl_havana	143634806	143649661
2286.24	-0.351514	0.154159	-2.2802	0.0225961	0.180094	Diet_Effect	ENSMUSG00000010755	Cars	protein_coding	ensembl_havana	143557230	143600090
185.489	-0.446331	0.299597	-1.48977	0.136284	0.490011	Diet_Effect	ENSMUSG00000010760	Phlda2	protein_coding	ensembl_havana	143501545	143503150
270.106	0.840359	0.363839	2.3097	0.020905	0.171207	Diet_Effect	ENSMUSG00000010796	Asz1	protein_coding	ensembl_havana	18050964	18109061
1.53281	1.46142	3.35427	0.435689	0.663063		Diet_Effect	ENSMUSG00000010797	Wnt2	protein_coding	ensembl_havana	17988940	18030585
18.3859	-2.62894	1.21311	-2.1671	0.030227	0.216224	Diet_Effect	ENSMUSG00000010803	Gabra1	protein_coding	ensembl_havana	42130939	42182930
1.23573	-1.93291	3.31227	-0.58356	0.559517		Diet_Effect	ENSMUSG00000010825	Grid2ip	protein_coding	ensembl_havana	143357338	143392152
873.046	-0.255936	0.176984	-1.4461	0.14815	0.508558	Diet_Effect	ENSMUSG00000010830	Kdelr3	protein_coding	ensembl_havana	79516411	79527739
5.61088	0.000105302	1.11985	9.40322e-05	0.999925		Diet_Effect	ENSMUSG00000010841	Cfap97d1	protein_coding	ensembl_havana	101984279	101992264
1029.66	0.059223	0.139559	0.424358	0.671305	0.918342	Diet_Effect	ENSMUSG00000010911	Apip	protein_coding	ensembl_havana	103073675	103092644
990.128	0.0715173	0.12293	0.581772	0.56072	0.87343	Diet_Effect	ENSMUSG00000010914	Pdhx	protein_coding	ensembl_havana	103021075	103073513
521.737	0.147418	0.210266	0.7011	0.483241	0.833242	Diet_Effect	ENSMUSG00000010936	Vac14	protein_coding	ensembl_havana	110618585	110720398
9.03469	1.91511	1.29623	1.47744	0.139558	0.49521	Diet_Effect	ENSMUSG00000011008	Mcoln2	protein_coding	ensembl_havana	146149833	146195513
24421.6	0.179773	0.080639	2.22936	0.02579	0.19592	Diet_Effect	ENSMUSG00000011034	Slc5a1	protein_coding	ensembl_havana	33104219	33162870
1886.75	0.142511	0.119575	1.19182	0.233334	0.627776	Diet_Effect	ENSMUSG00000011096	Akt1s1	protein_coding	ensembl_havana	44848991	44855421
6193.52	-0.120068	0.0889688	-1.34956	0.177158	0.554526	Diet_Effect	ENSMUSG00000011114	Tbrg1	protein_coding	ensembl_havana	37648763	37657312
844.666	-0.460511	0.142603	-3.22932	0.00124084	0.024989	Diet_Effect	ENSMUSG00000011148	Adssl1	protein_coding	ensembl_havana	112620045	112641360
11.9745	-1.01305	1.13356	-0.893695	0.371485	0.756584	Diet_Effect	ENSMUSG00000011154	Cfap161	protein_coding	ensembl_havana	83774101	83794880
1112.81	0.0318858	0.159088	0.200428	0.841146	0.967467	Diet_Effect	ENSMUSG00000011158	Brf1	protein_coding	ensembl_havana	112960085	113000704
9.74329	-1.14411	1.28996	-0.886934	0.375114	0.759252	Diet_Effect	ENSMUSG00000011171	Vipr2	protein_coding	ensembl_havana	116077726	116146261
1426.33	-0.202849	0.197478	-1.0272	0.304327	0.699727	Diet_Effect	ENSMUSG00000011179	Odc1	protein_coding	ensembl_havana	17544794	17551505
178.763	-0.191798	0.242668	-0.790369	0.429312	0.799182	Diet_Effect	ENSMUSG00000011254	Thg1l	protein_coding	ensembl_havana	45946843	45955494
1.68739	-1.14405	3.33123	-0.343432	0.731273		Diet_Effect	ENSMUSG00000011256	Adam19	protein_coding	ensembl_havana	46055992	46147343
583.149	-0.0559975	0.168044	-0.33323	0.73896	0.938703	Diet_Effect	ENSMUSG00000011257	Pabpc4	protein_coding	ensembl_havana	123262351	123298925
3.34253	-0.947341	2.26149	-0.418901	0.675289		Diet_Effect	ENSMUSG00000011263	Exoc3l2	protein_coding	ensembl_havana	19463331	19496762
343.787	0.172766	0.217717	0.793535	0.427466	0.79831	Diet_Effect	ENSMUSG00000011267	Zfp296	protein_coding	ensembl_havana	19577287	19580656
647.133	0.352002	0.207848	1.69355	0.0903503	0.39838	Diet_Effect	ENSMUSG00000011305	Plin5	protein_coding	ensembl_havana	56111601	56117596
2165.66	0.103467	0.109572	0.944279	0.345027	0.736847	Diet_Effect	ENSMUSG00000011306	Sugp1	protein_coding	ensembl_havana	70042813	70072347
867.302	0.0423494	0.150615	0.281177	0.778575	0.949496	Diet_Effect	ENSMUSG00000011382	Dhdh	protein_coding	ensembl_havana	45470987	45488805
971.386	0.257243	0.152048	1.69186	0.0906736	0.399246	Diet_Effect	ENSMUSG00000011427	Zfp790	protein_coding	ensembl_havana	29816114	29831005
23.5999	-0.304048	0.638656	-0.476075	0.634021	0.904885	Diet_Effect	ENSMUSG00000011589	Fsd1	protein_coding	ensembl_havana	55986509	55996881
2.00235	1.65804	3.02506	0.5481	0.583623		Diet_Effect	ENSMUSG00000011632	Pinlyp	protein_coding	ensembl_havana	24541658	24546118
634.437	0.133759	0.187472	0.713491	0.475542	0.828883	Diet_Effect	ENSMUSG00000011658	Fuz	protein_coding	ensembl_havana	44896079	44902631
3.24351	0.224742	2.08215	0.107937	0.914046		Diet_Effect	ENSMUSG00000011751	Sptbn4	protein_coding	ensembl_havana	27356383	27447686
3311.78	-0.278384	0.101945	-2.73072	0.00631966	0.0786099	Diet_Effect	ENSMUSG00000011752	Pgam1	protein_coding	ensembl_havana	41911923	41918660
1688.06	0.0226855	0.151006	0.15023	0.880583	0.978056	Diet_Effect	ENSMUSG00000011831	Evi5	protein_coding	ensembl_havana	107744795	107875107
425.153	0.36443	0.196274	1.85674	0.0633478	0.329969	Diet_Effect	ENSMUSG00000011832	Evi5l	protein_coding	ensembl_havana	4166567	4211257
1809.89	0.12384	0.102627	1.2067	0.227549	0.619722	Diet_Effect	ENSMUSG00000011837	Snapc2	protein_coding	ensembl_havana	4253080	4256220
1408.09	-0.219222	0.138756	-1.57991	0.114128	0.449115	Diet_Effect	ENSMUSG00000011877	Git1	protein_coding	ensembl_havana	77493562	77507786
3436.6	0.0276305	0.121015	0.228322	0.819396	0.962211	Diet_Effect	ENSMUSG00000011884	Gltp	protein_coding	ensembl_havana	114669398	114690984
2743.48	-0.102834	0.104781	-0.981415	0.326388	0.718954	Diet_Effect	ENSMUSG00000011958	Bnip2	protein_coding	ensembl_havana	69989466	70008317
3357.65	-0.177687	0.120176	-1.47856	0.139259	0.494903	Diet_Effect	ENSMUSG00000011960	Ccnt1	protein_coding	ensembl_havana	98538689	98570923
83.8182	-0.343966	0.449776	-0.764749	0.444421	0.810265	Diet_Effect	ENSMUSG00000012017	Scarf2	protein_coding	ensembl_havana	17797282	17808293
681.793	-0.0118128	0.161841	-0.07299	0.941814	0.990708	Diet_Effect	ENSMUSG00000012076	Brms1l	protein_coding	ensembl_havana	55836324	55869736
4397.56	-0.0669601	0.113973	-0.587507	0.556863	0.87108	Diet_Effect	ENSMUSG00000012114	Med15	protein_coding	ensembl_havana	17651208	17732891
2269.48	-0.00931043	0.101665	-0.0915797	0.927032	0.988731	Diet_Effect	ENSMUSG00000012117	Dhdds	protein_coding	ensembl_havana	133969028	134000918
866.29	-0.823719	0.491075	-1.67738	0.0934685	0.404124	Diet_Effect	ENSMUSG00000012123	Crybg2	protein_coding	ensembl_havana	134060815	134092504
758.069	0.0545072	0.16361	0.333154	0.739018	0.938703	Diet_Effect	ENSMUSG00000012126	Ubxn11	protein_coding	ensembl_havana	134102570	134127593
1565.28	-0.153431	0.110106	-1.39348	0.163474	0.534575	Diet_Effect	ENSMUSG00000012296	Tjap1	protein_coding	ensembl_havana	46257851	46283026
24964	0.0275003	0.0953782	0.288329	0.773095	0.947917	Diet_Effect	ENSMUSG00000012350	Ehf	protein_coding	ensembl_havana	103263433	103303278
11932.4	-0.0472348	0.113269	-0.417014	0.676668	0.919796	Diet_Effect	ENSMUSG00000012405	Rpl15	protein_coding	ensembl_havana	18267823	18271391
1646.5	-0.0522186	0.121882	-0.428435	0.668334	0.917105	Diet_Effect	ENSMUSG00000012422	Tmem167	protein_coding	ensembl_havana	90089123	90143907
1343.97	-0.836185	0.652067	-1.28236	0.199716	0.586761	Diet_Effect	ENSMUSG00000012428	Steap4	protein_coding	ensembl_havana	7960457	7982213
305.321	0.175477	0.344718	0.509046	0.61072	0.897596	Diet_Effect	ENSMUSG00000012429	Mplkip	protein_coding	ensembl_havana	17695192	17699748
90.7035	1.38249	0.550779	2.51006	0.012071	0.120625	Diet_Effect	ENSMUSG00000012443	Kif11	protein_coding	ensembl_havana	37376403	37421859
565.8	0.225647	0.153155	1.47333	0.140663	0.497046	Diet_Effect	ENSMUSG00000012483	Rpa3	protein_coding	ensembl_havana	8255936	8259173
329.252	0.149914	0.194574	0.770475	0.441018	0.808029	Diet_Effect	ENSMUSG00000012519	Mlkl	protein_coding	ensembl_havana	111311797	111338177
3389.12	-0.00252298	0.122661	-0.0205687	0.98359	0.998474	Diet_Effect	ENSMUSG00000012535	Tnpo3	protein_coding	ensembl_havana	29540827	29609887
1562.46	0.0796168	0.114344	0.696291	0.486247	0.834808	Diet_Effect	ENSMUSG00000012609	Ttll5	protein_coding	ensembl_havana	85824659	86061893
1165.03	0.10029	0.119838	0.836879	0.402661	0.780213	Diet_Effect	ENSMUSG00000012640	Zfp715	protein_coding	ensembl_havana	43296197	43313294
3.45883	3.96837	2.24311	1.76914	0.0768705		Diet_Effect	ENSMUSG00000012777	Acp4	protein_coding	ensembl_havana	44252148	44257378
1.20175	0.849767	3.31606	0.256258	0.797751		Diet_Effect	ENSMUSG00000012819	Cdh23	protein_coding	ensembl_havana	60302748	60696490
13433.8	-0.111562	0.131316	-0.849572	0.395563	0.775512	Diet_Effect	ENSMUSG00000012848	Rps5	protein_coding	ensembl_havana	12922290	12926686
8.8932	1.18792	1.36758	0.868633	0.385048	0.767171	Diet_Effect	ENSMUSG00000012889	Podnl1	protein_coding	ensembl_havana	84125989	84132527
123.488	0.458637	0.310211	1.47847	0.139283	0.494903	Diet_Effect	ENSMUSG00000013033	Adgrl1	protein_coding	ensembl_havana	83900105	83941954
2840.47	0.069812	0.121242	0.575807	0.564746	0.875431	Diet_Effect	ENSMUSG00000013076	Amotl1	protein_coding	ensembl_havana	14541966	14645056
109.045	-0.723056	0.324683	-2.22696	0.0259502	0.19646	Diet_Effect	ENSMUSG00000013083	2200002J24Rik	protein_coding	ensembl_havana	30698926	30700536
2445.66	0.20027	0.133501	1.50014	0.133579	0.484158	Diet_Effect	ENSMUSG00000013089	Etv5	protein_coding	ensembl_havana	22381309	22439719
22.8928	-0.0719205	0.621857	-0.115654	0.907926	0.98535	Diet_Effect	ENSMUSG00000013091	Tmem190	protein_coding	ensembl_havana	4782937	4784341
1131.69	-0.00500227	0.144594	-0.0345952	0.972403	0.996633	Diet_Effect	ENSMUSG00000013150	Gfod2	protein_coding	ensembl_havana	105713854	105758664
510.455	0.173122	0.186281	0.929357	0.352704	0.743114	Diet_Effect	ENSMUSG00000013155	Enkd1	protein_coding	ensembl_havana	105703651	105708210
6.05922	-1.33079	1.42717	-0.932469	0.351094		Diet_Effect	ENSMUSG00000013158	4933405L10Rik	protein_coding	ensembl_havana	105707655	105710246
3987.49	0.0151599	0.110653	0.137003	0.891028	0.981126	Diet_Effect	ENSMUSG00000013160	Atp6v0d1	protein_coding	ensembl_havana	105524465	105566047
2582.44	0.0808526	0.112424	0.719179	0.472031	0.826229	Diet_Effect	ENSMUSG00000013236	Ptprs	protein_coding	ensembl_havana	56412426	56476483
1898.85	-0.0562099	0.118163	-0.475696	0.634291	0.904926	Diet_Effect	ENSMUSG00000013275	Slc41a1	protein_coding	ensembl_havana	131827493	131848865
5.96667	3.35691	2.09715	1.6007	0.109443		Diet_Effect	ENSMUSG00000013338	Fer1l4	protein_coding	ensembl_havana	156019139	156052947
872.38	-1.81487	0.638287	-2.84334	0.00446433	0.0631135	Diet_Effect	ENSMUSG00000013418	B4galnt2	protein_coding	ensembl_havana	95865943	95914891
431.085	0.0846195	0.214948	0.393674	0.693821	0.924927	Diet_Effect	ENSMUSG00000013419	Zfp651	protein_coding	ensembl_havana	121759330	121771742
6988.12	0.104442	0.0934954	1.11709	0.263958	0.660589	Diet_Effect	ENSMUSG00000013465	Nelfb	protein_coding	ensembl_havana	25199712	25211489
98.1431	-1.46556	0.579262	-2.53005	0.0114045	0.116815	Diet_Effect	ENSMUSG00000013483	Card14	protein_coding	ensembl_havana	119307768	119345375
1372.69	0.358623	0.126762	2.82911	0.0046678	0.0646719	Diet_Effect	ENSMUSG00000013495	Tmem175	protein_coding	ensembl_havana	108629770	108648782
8.46167	-1.27858	1.46036	-0.875519	0.381292	0.764053	Diet_Effect	ENSMUSG00000013523	Bcas1	protein_coding	ensembl_havana	170346991	170427845
1807.72	0.0740576	0.134487	0.550666	0.581863	0.88225	Diet_Effect	ENSMUSG00000013539	Tango2	protein_coding	ensembl_havana	18300825	18348103
3332.9	0.4456	0.141957	3.13898	0.00169535	0.0313885	Diet_Effect	ENSMUSG00000013584	Aldh1a2	protein_coding	ensembl_havana	71215789	71296243
8519.07	-0.0668871	0.0940812	-0.710951	0.477115	0.829407	Diet_Effect	ENSMUSG00000013593	Ndufs2	protein_coding	ensembl_havana	171234853	171251388
4657.4	0.0407203	0.117712	0.345932	0.729394	0.937211	Diet_Effect	ENSMUSG00000013622	Atraid	protein_coding	ensembl_havana	31048312	31054623
545.153	0.179386	0.17089	1.04971	0.293849	0.690695	Diet_Effect	ENSMUSG00000013629	Cad	protein_coding	ensembl_havana	31054780	31078479
3.4344	-2.68282	3.13446	-0.855914	0.392046		Diet_Effect	ENSMUSG00000013643	Lypd8	protein_coding	ensembl_havana	58379043	58390728
1384.57	0.220718	0.157037	1.40551	0.159868	0.527387	Diet_Effect	ENSMUSG00000013646	Sh3bp5l	protein_coding	ensembl_havana	58330724	58347728
4230.91	-0.012081	0.0949548	-0.127229	0.898759	0.983506	Diet_Effect	ENSMUSG00000013662	Atad1	protein_coding	ensembl_havana	32671638	32739786
1662.43	-0.064922	0.193812	-0.334974	0.737645	0.938703	Diet_Effect	ENSMUSG00000013663	Pten	protein_coding	ensembl_havana	32757497	32826160
8788.54	-0.246401	0.0992621	-2.48233	0.0130528	0.126864	Diet_Effect	ENSMUSG00000013698	Pea15a	protein_coding	ensembl_havana	172196728	172206804
2837.69	-0.152173	0.105324	-1.44481	0.148512	0.509236	Diet_Effect	ENSMUSG00000013701	Timm23	protein_coding	ensembl_havana	32180162	32201898
6.99755	-0.26048	1.44097	-0.180768	0.85655	0.971828	Diet_Effect	ENSMUSG00000013707	Tnfaip8l2	protein_coding	ensembl_havana	95139521	95142360
1531.17	0.0532253	0.114009	0.466852	0.640606	0.907755	Diet_Effect	ENSMUSG00000013736	Trnt1	protein_coding	ensembl_havana	106769120	106782474
119.001	0.0959423	0.3018	0.3179	0.750561	0.941753	Diet_Effect	ENSMUSG00000013766	Ly6g6e	protein_coding	ensembl_havana	35076902	35078804
2951.56	0.0188875	0.10818	0.174593	0.861399	0.973291	Diet_Effect	ENSMUSG00000013787	Ehmt2	protein_coding	ensembl_havana	34898469	34914052
3354.94	0.018975	0.103516	0.183306	0.854558	0.971194	Diet_Effect	ENSMUSG00000013822	Elof1	protein_coding	ensembl_havana	22112989	22117172
989.567	0.222399	0.198228	1.12193	0.26189	0.658578	Diet_Effect	ENSMUSG00000013833	Med16	protein_coding	ensembl_havana	79894708	79908923
2959.46	-0.513305	0.117058	-4.38505	1.15961e-05	0.000641687	Diet_Effect	ENSMUSG00000013846	St3gal1	protein_coding	ensembl_havana	67102875	67176830
566.158	-0.0144826	0.209237	-0.0692162	0.944818	0.990816	Diet_Effect	ENSMUSG00000013858	Tmem259	protein_coding	ensembl_havana	79974948	79984330
448.042	0.131152	0.205607	0.637878	0.523553	0.855874	Diet_Effect	ENSMUSG00000013878	Rnf170	protein_coding	ensembl_havana	26119368	26151790
16.0486	-4.84903	1.44827	-3.34816	0.000813506	0.0183034	Diet_Effect	ENSMUSG00000013921	Clip3	protein_coding	ensembl_havana	30291728	30308367
4.65391	-2.10669	1.58578	-1.32849	0.184018		Diet_Effect	ENSMUSG00000013928	Thap8	protein_coding	ensembl_havana	30280094	30290237
1.7013	0.466464	3.32843	0.140145	0.888545		Diet_Effect	ENSMUSG00000013936	Myl2	protein_coding	ensembl_havana	122100951	122113472
110.711	-0.138447	0.313225	-0.442005	0.658485	0.913698	Diet_Effect	ENSMUSG00000013973	Dedd	protein_coding	ensembl_havana	171329145	171342331
3231.75	-0.0861531	0.101444	-0.849268	0.395732	0.775623	Diet_Effect	ENSMUSG00000013997	Nit1	protein_coding	ensembl_havana	171338008	171345646
2.31953	1.62774	2.95931	0.55004	0.582292		Diet_Effect	ENSMUSG00000014030	Pax5	protein_coding	ensembl_havana	44524757	44710487
761.024	-0.0938035	0.198375	-0.472859	0.636314	0.906063	Diet_Effect	ENSMUSG00000014039	Prdm15	protein_coding	ensembl_havana	97791467	97851850
901.358	0.214138	0.1555	1.3771	0.168482	0.542575	Diet_Effect	ENSMUSG00000014074	Rnf168	protein_coding	ensembl_havana	32277459	32301434
613.56	0.147307	0.152574	0.965478	0.334306	0.725931	Diet_Effect	ENSMUSG00000014075	Tctex1d2	protein_coding	ensembl_havana	32419702	32429099
18166.4	-0.132394	0.100099	-1.32263	0.185959	0.568207	Diet_Effect	ENSMUSG00000014077	Chp1	protein_coding	ensembl_havana	119547697	119587027
2019.17	-0.0675092	0.103998	-0.649138	0.516249	0.852677	Diet_Effect	ENSMUSG00000014158	Trpv4	protein_coding	ensembl_havana	114622152	114658421
589.765	0.20813	0.1557	1.33673	0.181309	0.561387	Diet_Effect	ENSMUSG00000014164	Klhl3	protein_coding	ensembl_havana	58000228	58113592
3546.72	0.0332684	0.108726	0.305984	0.759617	0.943846	Diet_Effect	ENSMUSG00000014177	Tvp23b	protein_coding	ensembl_havana	62879455	62916780
4125.52	0.0269414	0.0990158	0.272092	0.785551	0.9517	Diet_Effect	ENSMUSG00000014195	Dnajc7	protein_coding	ensembl_havana	100582818	100620188
3.02879	-0.761248	2.27158	-0.335118	0.737536		Diet_Effect	ENSMUSG00000014198	Zfp385c	protein_coding	ensembl_havana	100627543	100692455
5480.26	-0.148687	0.12374	-1.20161	0.229513	0.622372	Diet_Effect	ENSMUSG00000014226	Cacybp	protein_coding	ensembl_havana	160202367	160212875
516.468	0.170724	0.151023	1.13045	0.258289	0.654251	Diet_Effect	ENSMUSG00000014232	Cluap1	protein_coding	ensembl_havana	3908801	3941147
214.29	0.213968	0.268145	0.797957	0.424895	0.796287	Diet_Effect	ENSMUSG00000014243	Zswim7	protein_coding	ensembl_havana	62267224	62281375
424.65	-0.0904944	0.180406	-0.501616	0.615938	0.898987	Diet_Effect	ENSMUSG00000014245	Pigl	protein_coding	ensembl_havana	62458460	62514417
6769.16	-0.101396	0.134882	-0.751738	0.452209	0.813167	Diet_Effect	ENSMUSG00000014294	Ndufa2	protein_coding	ensembl_havana	36742332	36744557
739.074	-0.0755324	0.14705	-0.51365	0.607496	0.896137	Diet_Effect	ENSMUSG00000014301	Pam16	protein_coding	ensembl_havana	4616464	4624988
3135.64	0.0458781	0.109027	0.420796	0.673904	0.919173	Diet_Effect	ENSMUSG00000014303	Glis2	protein_coding	ensembl_havana	4594713	4624924
4216.51	-0.113796	0.131544	-0.865082	0.386994	0.768937	Diet_Effect	ENSMUSG00000014313	Cox6c	protein_coding	ensembl_havana	35925886	35938246
17810.5	0.159316	0.107827	1.47752	0.139536	0.49521	Diet_Effect	ENSMUSG00000014329	Bicc1	protein_coding	ensembl_havana	70922832	71159700
1486.33	-0.0312616	0.174045	-0.179618	0.857452	0.971966	Diet_Effect	ENSMUSG00000014349	Ube2z	protein_coding	ensembl_havana	96047432	96065388
2174.56	-0.1189	0.103225	-1.15185	0.249381	0.646946	Diet_Effect	ENSMUSG00000014353	Tmem87b	protein_coding	ensembl_havana	128818118	128854261
2973.15	0.197365	0.100018	1.97329	0.0484624	0.285301	Diet_Effect	ENSMUSG00000014355	Anapc1	protein_coding	ensembl_havana	128610104	128687391
51.1211	-0.965137	0.723181	-1.33457	0.182017	0.562426	Diet_Effect	ENSMUSG00000014361	Mertk	protein_coding	ensembl_havana	128698956	128802894
5266.39	0.10557	0.0871468	1.2114	0.225742	0.618582	Diet_Effect	ENSMUSG00000014402	Tsg101	protein_coding	ensembl_havana	46888949	46919969
1137	0.308244	0.179828	1.71411	0.0865086	0.389148	Diet_Effect	ENSMUSG00000014418	Hps5	protein_coding	ensembl_havana	46760466	46796064
2486.41	-0.0463545	0.132444	-0.349992	0.726344	0.936259	Diet_Effect	ENSMUSG00000014426	Map3k4	protein_coding	ensembl_havana	12227621	12318796
606.384	-0.469069	0.167181	-2.80576	0.00501977	0.068216	Diet_Effect	ENSMUSG00000014444	Piezo1	protein_coding	ensembl_havana	122481698	122551329
691.039	-0.275062	0.184476	-1.49104	0.13595	0.489198	Diet_Effect	ENSMUSG00000014470	Rnf166	protein_coding	ensembl_havana	122466147	122476064
1059.13	-0.139849	0.21883	-0.639075	0.522774	0.855445	Diet_Effect	ENSMUSG00000014496	Ankrd28	protein_coding	ensembl_havana	31698768	31830651
315.142	0.276408	0.249949	1.10586	0.268787	0.665629	Diet_Effect	ENSMUSG00000014498	Ankrd52	protein_coding	ensembl_havana	128377115	128408704
217.163	0.0127281	0.224465	0.056704	0.954781	0.992338	Diet_Effect	ENSMUSG00000014503	Pkd2l2	protein_coding	ensembl_havana	34408489	34444116
2108.21	-0.188337	0.113718	-1.65617	0.0976867	0.413071	Diet_Effect	ENSMUSG00000014504	Srp19	protein_coding	ensembl_havana	34330847	34336599
1.41999	0.980143	3.32585	0.294705	0.76822		Diet_Effect	ENSMUSG00000014542	Clec4f	protein_coding	ensembl_havana	83644542	83656187
1022.36	-0.150386	0.162879	-0.923301	0.35585	0.746754	Diet_Effect	ENSMUSG00000014547	Wdfy2	protein_coding	ensembl_havana	62837678	62961509
1567.42	0.0571416	0.137597	0.415281	0.677936	0.919796	Diet_Effect	ENSMUSG00000014550	Rbsn	protein_coding	ensembl_havana	92186712	92214925
1380.3	0.0293183	0.11379	0.257652	0.796676	0.956037	Diet_Effect	ENSMUSG00000014551	Mrps25	protein_coding	ensembl_havana	92169525	92184033
2850.39	0.149969	0.0945375	1.58634	0.112663	0.446298	Diet_Effect	ENSMUSG00000014554	Dguok	protein_coding	ensembl_havana	83480217	83506969
458.056	-0.31561	0.20454	-1.54302	0.122826	0.466469	Diet_Effect	ENSMUSG00000014592	Camta1	protein_coding	ensembl_havana	150917322	151861876
2668.57	-0.562919	0.162755	-3.45869	0.000542805	0.0134369	Diet_Effect	ENSMUSG00000014599	Csf1	protein_coding	ensembl_havana	107741048	107760469
2572.04	-0.0549347	0.122069	-0.450031	0.652688	0.912165	Diet_Effect	ENSMUSG00000014601	Strip1	protein_coding	ensembl_havana	107612532	107631694
1469.63	-0.225861	0.125244	-1.80337	0.0713299	0.351067	Diet_Effect	ENSMUSG00000014602	Kif1a	protein_coding	ensembl_havana	93015464	93101951
5307.91	0.0764181	0.0850126	0.898903	0.368704	0.755742	Diet_Effect	ENSMUSG00000014606	Slc25a11	protein_coding	ensembl_havana	70644196	70647479
501.442	-0.0294479	0.169078	-0.174168	0.861734	0.973291	Diet_Effect	ENSMUSG00000014633	Cmc2	protein_coding	ensembl_havana	116888685	116921455
562.842	0.0623066	0.176773	0.352466	0.724488	0.935605	Diet_Effect	ENSMUSG00000014668	Chfr	protein_coding	ensembl_havana	110135842	110171972
54.0067	0.488041	0.485278	1.00569	0.314563	0.708308	Diet_Effect	ENSMUSG00000014686	Ceacam16	protein_coding	ensembl_havana	19852097	19861299
6.95729	0.057424	1.56979	0.0365807	0.970819	0.996039	Diet_Effect	ENSMUSG00000014704	Hoxa2	protein_coding	ensembl_havana	52162417	52164831
28.4286	-0.711263	1.04132	-0.683038	0.494583	0.840358	Diet_Effect	ENSMUSG00000014725	Adam28	protein_coding	ensembl_havana	68606027	68655842
2.87545	3.45008	2.02828	1.70098	0.0889461		Diet_Effect	ENSMUSG00000014747	Ankrd53	protein_coding	ensembl_havana	83762644	83768326
5312.95	-0.0694467	0.0901819	-0.770073	0.441256	0.808029	Diet_Effect	ENSMUSG00000014748	Tex261	protein_coding	ensembl_havana	83768885	83775813
3062.28	0.227222	0.119538	1.90083	0.0573243	0.311322	Diet_Effect	ENSMUSG00000014763	Fam120b	protein_coding	ensembl_havana	15396202	15433583
1378.73	0.143155	0.109533	1.30696	0.191226	0.576059	Diet_Effect	ENSMUSG00000014767	Tbp	protein_coding	ensembl_havana	15499888	15528379
7435.96	-0.0177665	0.10332	-0.171955	0.863473	0.973731	Diet_Effect	ENSMUSG00000014769	Psmb1	protein_coding	ensembl_havana	15475021	15499751
3109.34	-0.945651	0.721992	-1.30978	0.19027	0.574441	Diet_Effect	ENSMUSG00000014773	Dll1	protein_coding	ensembl_havana	15367354	15376872
52.6292	0.280531	0.441421	0.635519	0.52509	0.856777	Diet_Effect	ENSMUSG00000014776	Nol3	protein_coding	ensembl_havana	105276140	105281939
325.873	-0.147774	0.230887	-0.640026	0.522156	0.855122	Diet_Effect	ENSMUSG00000014778	Fhod1	protein_coding	ensembl_havana	105329163	105347953
1.55217	0.467412	3.36436	0.138931	0.889505		Diet_Effect	ENSMUSG00000014782	Plekhg4	protein_coding	ensembl_havana	105373274	105382862
37.2505	-0.0621291	0.531219	-0.116956	0.906895	0.985217	Diet_Effect	ENSMUSG00000014786	Slc9a5	protein_coding	ensembl_havana	105348843	105369881
3548.48	0.0799918	0.114562	0.698241	0.485026	0.834041	Diet_Effect	ENSMUSG00000014791	Elmo3	protein_coding	ensembl_havana	105305601	105310760
62.0123	-0.000440008	0.441741	-0.000996076	0.999205	0.999697	Diet_Effect	ENSMUSG00000014813	Stc1	protein_coding	ensembl_havana	69029238	69041804
189.118	0.515884	0.266273	1.93743	0.0526931	0.298505	Diet_Effect	ENSMUSG00000014837	4931428F04Rik	protein_coding	ensembl_havana	105280409	105289864
982.119	-0.288813	0.235625	-1.22573	0.220299	0.614001	Diet_Effect	ENSMUSG00000014846	Tppp3	protein_coding	ensembl_havana	105467493	105471526
796.163	0.189299	0.158862	1.19159	0.23342	0.627874	Diet_Effect	ENSMUSG00000014850	Msh3	protein_coding	ensembl_havana	92211872	92355003
3.52576	0.63301	2.5129	0.251904	0.801115		Diet_Effect	ENSMUSG00000014852	Adamts13	protein_coding	ensembl_havana	26973416	27009628
2134.88	0.00795589	0.109689	0.0725316	0.942179	0.990729	Diet_Effect	ENSMUSG00000014856	Tmem208	protein_coding	ensembl_havana	105326354	105335219
897.292	-0.253167	0.131385	-1.92692	0.0539898	0.30102	Diet_Effect	ENSMUSG00000014859	E2f4	protein_coding	ensembl_havana	105297663	105305370
11846.7	-0.140528	0.0894598	-1.57086	0.116216	0.453711	Diet_Effect	ENSMUSG00000014867	Surf4	protein_coding	ensembl_havana	26920040	26933928
1140.51	0.10246	0.120066	0.853366	0.393456	0.773325	Diet_Effect	ENSMUSG00000014873	Surf2	protein_coding	ensembl_havana	26916367	26920183
5676.41	-0.441811	0.116925	-3.77858	0.000157727	0.00507231	Diet_Effect	ENSMUSG00000014905	Dnajb9	protein_coding	ensembl_havana	44205559	44210326
261.694	0.198706	0.252149	0.788048	0.430668	0.80028	Diet_Effect	ENSMUSG00000014907	Naf1	protein_coding	ensembl_havana	66860217	66890564
2592.89	0.253278	0.109318	2.3169	0.0205094	0.169246	Diet_Effect	ENSMUSG00000014932	Yes1	protein_coding	ensembl_havana	32611171	32687057
5131.03	-0.113218	0.119017	-0.951273	0.341466	0.732907	Diet_Effect	ENSMUSG00000014956	Ppp1cb	protein_coding	ensembl_havana	32458843	32517433
5657.05	-0.10142	0.0924864	-1.09659	0.272819	0.671372	Diet_Effect	ENSMUSG00000014959	Gorasp2	protein_coding	ensembl_havana	70661576	70712636
1188.81	0.168656	0.122413	1.37777	0.168275	0.54237	Diet_Effect	ENSMUSG00000014980	Tsen15	protein_coding	ensembl_havana	152370735	152386688
4971.19	0.023628	0.0933196	0.253194	0.800118	0.956037	Diet_Effect	ENSMUSG00000015002	Efr3a	protein_coding	ensembl_havana	65787034	65873816
2098.89	0.016702	0.140456	0.118913	0.905344	0.985011	Diet_Effect	ENSMUSG00000015013	Trappc2l	protein_coding	ensembl_havana	122611640	122616660
1718.69	0.237855	0.12923	1.84056	0.0656863	0.335325	Diet_Effect	ENSMUSG00000015016	Acsf3	protein_coding	ensembl_havana	122775486	122817880
783.338	-0.0248142	0.147661	-0.168049	0.866545	0.974663	Diet_Effect	ENSMUSG00000015023	Ddx19a	protein_coding	ensembl_havana	110974996	110997800
699.72	-0.0188757	0.159145	-0.118606	0.905587	0.985196	Diet_Effect	ENSMUSG00000015027	Galns	protein_coding	ensembl_havana	122578242	122611463
11.7956	-4.11939	1.29435	-3.18258	0.00145968	0.0282834	Diet_Effect	ENSMUSG00000015053	Gata2	protein_coding	ensembl_havana	88193891	88207032
367.63	-0.0168576	0.169095	-0.0996932	0.920588	0.987548	Diet_Effect	ENSMUSG00000015083	C8g	protein_coding	ensembl_havana	25498651	25501719
1446.45	-0.118164	0.11467	-1.03047	0.302789	0.698328	Diet_Effect	ENSMUSG00000015085	Entpd2	protein_coding	ensembl_havana	25395874	25401321
2255.48	-0.00235256	0.104588	-0.0224935	0.982054	0.998374	Diet_Effect	ENSMUSG00000015087	Rabl6	protein_coding	ensembl_havana	25583018	25608521
1059.84	0.195094	0.152097	1.2827	0.199598	0.586761	Diet_Effect	ENSMUSG00000015090	Ptgds	protein_coding	ensembl_havana	25466709	25470046
6144.9	-0.049588	0.0940708	-0.527134	0.5981	0.891166	Diet_Effect	ENSMUSG00000015092	Edf1	protein_coding	ensembl_havana	25557847	25562082
281.592	0.0446572	0.211277	0.211368	0.8326	0.964138	Diet_Effect	ENSMUSG00000015093	Clic3	protein_coding	ensembl_havana	25456838	25458776
6889.95	0.0833897	0.0949485	0.878263	0.379801	0.762953	Diet_Effect	ENSMUSG00000015094	Npdc1	protein_coding	ensembl_havana	25399351	25409494
3441.8	0.254547	0.107673	2.36408	0.0180748	0.157106	Diet_Effect	ENSMUSG00000015095	Fbxw5	protein_coding	ensembl_havana	25500750	25505471
1211.64	-0.104192	0.112688	-0.924605	0.355171	0.746606	Diet_Effect	ENSMUSG00000015112	Slc25a13	protein_coding	ensembl_havana	6041218	6217173
5878.2	0.0210521	0.0916426	0.22972	0.81831	0.961425	Diet_Effect	ENSMUSG00000015120	Ube2i	protein_coding	ensembl_havana	25261916	25274622
863.827	0.0409763	0.129991	0.315225	0.752591	0.942605	Diet_Effect	ENSMUSG00000015126	Tsr3	protein_coding	ensembl	25240170	25242798
453.718	0.217177	0.236362	0.918834	0.358183	0.748967	Diet_Effect	ENSMUSG00000015127	Unkl	protein_coding	ensembl_havana	25188397	25234443
1068	-0.0169242	0.146706	-0.115361	0.908159	0.98535	Diet_Effect	ENSMUSG00000015133	Lrrk1	protein_coding	ensembl_havana	66226912	66388350
4.98921	-0.129281	2.44579	-0.0528588	0.957844		Diet_Effect	ENSMUSG00000015134	Aldh1a3	protein_coding	ensembl_havana	66390890	66427517
1985.76	-0.241495	0.138292	-1.74627	0.0807646	0.37601	Diet_Effect	ENSMUSG00000015143	Actn1	protein_coding	ensembl_havana	80167547	80260371
4753.32	0.112889	0.0982303	1.14922	0.250463	0.647578	Diet_Effect	ENSMUSG00000015149	Sirt2	protein_coding	ensembl_havana	28766735	28788661
2811.32	0.0368474	0.126268	0.291819	0.770425	0.946839	Diet_Effect	ENSMUSG00000015165	Hnrnpl	protein_coding	ensembl_havana	28808541	28822266
2520.25	-0.158139	0.118667	-1.33262	0.182655	0.563688	Diet_Effect	ENSMUSG00000015176	Nolc1	protein_coding	ensembl_havana	46075863	46085530
979.313	-0.102611	0.16951	-0.605337	0.544955	0.866053	Diet_Effect	ENSMUSG00000015189	Casd1	protein_coding	ensembl_havana	4600839	4643355
1493.05	0.107048	0.213429	0.501562	0.615976	0.898987	Diet_Effect	ENSMUSG00000015202	Cnksr3	protein_coding	ensembl_havana	7119063	7212237
481.573	-0.0781044	0.168396	-0.463815	0.64278	0.908614	Diet_Effect	ENSMUSG00000015214	Mtmr1	protein_coding	ensembl_havana	71364760	71419196
1148.1	0.50072	0.121072	4.13572	3.53849e-05	0.00157419	Diet_Effect	ENSMUSG00000015217	Hmgb3	protein_coding	ensembl_havana	71555918	71560676
2339.53	-0.0596887	0.128713	-0.463735	0.642837	0.908614	Diet_Effect	ENSMUSG00000015222	Map2	protein_coding	ensembl_havana	66175273	66442583
650.522	0.0861228	0.175995	0.489348	0.624595	0.901522	Diet_Effect	ENSMUSG00000015224	Cyp2j9	protein_coding	ensembl_havana	96568429	96591578
701.867	0.00690749	0.23773	0.029056	0.97682	0.997522	Diet_Effect	ENSMUSG00000015243	Abca1	protein_coding	ensembl_havana	53030787	53159895
3014	0.0340942	0.107641	0.316741	0.75144	0.942238	Diet_Effect	ENSMUSG00000015247	Nipsnap3b	protein_coding	ensembl_havana	53011880	53022060
1128.52	0.10275	0.150886	0.680981	0.495884	0.841094	Diet_Effect	ENSMUSG00000015289	Lage3	protein_coding	ensembl_havana	74351276	74353618
5250.41	-0.0996694	0.099106	-1.00568	0.314567	0.708308	Diet_Effect	ENSMUSG00000015290	Ubl4a	protein_coding	ensembl_havana	74365718	74373218
9333.74	0.0274382	0.0912075	0.300832	0.763543	0.944931	Diet_Effect	ENSMUSG00000015291	Gdi1	protein_coding	ensembl_havana	74304998	74311862
301.031	-0.192941	0.299585	-0.644028	0.519558	0.854088	Diet_Effect	ENSMUSG00000015305	Sash1	protein_coding	ensembl_havana	8722219	8886070
29498.6	0.394126	0.112058	3.51717	0.000436172	0.0114578	Diet_Effect	ENSMUSG00000015312	Gadd45b	protein_coding	ensembl_havana	80930073	80932204
1.34297	-0.852549	2.8545	-0.298668	0.765193		Diet_Effect	ENSMUSG00000015314	Slamf6	protein_coding	ensembl_havana	171917515	171953170
516.387	-0.0526007	0.175021	-0.30054	0.763765	0.945001	Diet_Effect	ENSMUSG00000015335	Zdhhc12	protein_coding	ensembl_havana	30090944	30093648
45.836	0.0159849	0.484944	0.0329623	0.973705	0.99708	Diet_Effect	ENSMUSG00000015337	Endog	protein_coding	ensembl_havana	30171493	30174069
208.83	0.785724	0.26354	2.98143	0.0028691	0.0461334	Diet_Effect	ENSMUSG00000015340	Cybb	protein_coding	ensembl_havana	9435252	9487771
3234.35	-0.0284593	0.0971458	-0.292954	0.769557	0.946649	Diet_Effect	ENSMUSG00000015341	Golga7	protein_coding	ensembl_havana	23241346	23257074
375.067	-0.174278	0.224211	-0.777292	0.436986	0.804826	Diet_Effect	ENSMUSG00000015342	Xk	protein_coding	ensembl_havana	9272756	9313250
15.0367	-1.48581	0.877093	-1.69401	0.0902629	0.398198	Diet_Effect	ENSMUSG00000015354	Pcolce2	protein_coding	ensembl_havana	95637601	95698096
5574.92	0.100483	0.0997605	1.00724	0.313819	0.707456	Diet_Effect	ENSMUSG00000015357	Clpx	protein_coding	ensembl_havana	65294260	65330658
3631.64	-0.198579	0.108145	-1.83623	0.0663243	0.336625	Diet_Effect	ENSMUSG00000015363	Trabd	protein_coding	ensembl_havana	89075124	89087077
1128.16	0.238588	0.178087	1.33973	0.180334	0.560469	Diet_Effect	ENSMUSG00000015377	Dennd6b	protein_coding	ensembl_havana	89182213	89196496
38.9649	0.704326	0.569465	1.23682	0.216154	0.607544	Diet_Effect	ENSMUSG00000015396	Cd83	protein_coding	ensembl_havana	43784775	43803132
1333.55	1.02124	0.161644	6.31784	2.65241e-10	5.55409e-08	Diet_Effect	ENSMUSG00000015401	Cltrn	protein_coding	ensembl_havana	164088830	164118860
1537.38	1.2569	0.127749	9.83879	7.6624e-23	1.56883e-19	Diet_Effect	ENSMUSG00000015405	Ace2	protein_coding	ensembl_havana	164139332	164188420
13.5005	1.23847	0.953577	1.29877	0.194024	0.579557	Diet_Effect	ENSMUSG00000015451	C4a	processed_transcript	ensembl_havana	34809092	34823464
112.485	-0.554387	0.368714	-1.50357	0.132692	0.482356	Diet_Effect	ENSMUSG00000015452	Ager	protein_coding	ensembl_havana	34597862	34600936
2499.27	0.163545	0.111964	1.46069	0.144101	0.501861	Diet_Effect	ENSMUSG00000015461	Atf6b	protein_coding	ensembl_havana	34647146	34655074
29.6479	0.344012	0.546408	0.629589	0.528964	0.858573	Diet_Effect	ENSMUSG00000015467	Egfl8	protein_coding	ensembl_havana	34613349	34615971
16.0449	0.301211	0.793867	0.379423	0.704374	0.927902	Diet_Effect	ENSMUSG00000015468	Notch4	protein_coding	ensembl_havana	34564268	34588503
386.419	0.111545	0.186002	0.5997	0.548706	0.867768	Diet_Effect	ENSMUSG00000015474	Ppt2	protein_coding	ensembl_havana	34616662	34628510
14.5937	-0.788049	0.85564	-0.921005	0.357048	0.747225	Diet_Effect	ENSMUSG00000015476	Prrt1	protein_coding	ensembl_havana	34629533	34633126
1869.49	-0.0340134	0.111904	-0.303951	0.761165	0.944511	Diet_Effect	ENSMUSG00000015478	Rnf5	protein_coding	ensembl_havana	34601091	34603690
420.606	0.150022	0.273192	0.549143	0.582907	0.882817	Diet_Effect	ENSMUSG00000015484	Fam163a	protein_coding	ensembl_havana	156075966	156205026
3387.29	-0.0947221	0.107256	-0.883144	0.377159	0.760757	Diet_Effect	ENSMUSG00000015488	Cacfd1	protein_coding	ensembl_havana	27009926	27021089
1676.58	-0.46647	0.129955	-3.58949	0.000331326	0.00920867	Diet_Effect	ENSMUSG00000015501	Hivep2	protein_coding	ensembl_havana	13966075	14151374
27.2312	-1.01975	0.832598	-1.22479	0.220656	0.614329	Diet_Effect	ENSMUSG00000015519	2310057J18Rik	protein_coding	ensembl_havana	28972288	28986303
3834.79	-0.0110938	0.0986527	-0.112453	0.910464	0.986268	Diet_Effect	ENSMUSG00000015522	Arnt	protein_coding	ensembl_havana	95434388	95497240
547.421	-0.386319	0.255415	-1.51252	0.130403	0.479399	Diet_Effect	ENSMUSG00000015533	Itga2	protein_coding	ensembl_havana	114833081	114932100
2222.43	-0.0347697	0.10674	-0.325742	0.74462	0.940188	Diet_Effect	ENSMUSG00000015536	Mocs2	protein_coding	ensembl_havana	114818236	114832275
1061.15	0.0254706	0.135075	0.188566	0.850433	0.969856	Diet_Effect	ENSMUSG00000015542	Nat9	protein_coding	ensembl_havana	115182832	115187859
691.487	-1.42057	0.194733	-7.29496	2.98742e-13	1.32468e-10	Diet_Effect	ENSMUSG00000015568	Lpl	protein_coding	ensembl_havana	68880491	68907448
8445.06	-0.202795	0.108202	-1.87422	0.0608998	0.322935	Diet_Effect	ENSMUSG00000015575	Atp6v0e	protein_coding	ensembl_havana	26663231	26699647
312.659	-0.244513	0.219055	-1.11622	0.26433	0.660709	Diet_Effect	ENSMUSG00000015597	Zfp318	protein_coding	ensembl_havana	46383731	46420920
4.57836	3.89938	1.89595	2.05669	0.0397158		Diet_Effect	ENSMUSG00000015599	Ttbk1	protein_coding	ensembl_havana	46442448	46487675
1138.26	0.0629967	0.206707	0.304764	0.760546	0.944061	Diet_Effect	ENSMUSG00000015605	Srf	protein_coding	ensembl_havana	46548329	46556175
124.297	-1.06804	0.541669	-1.97176	0.0486365	0.285695	Diet_Effect	ENSMUSG00000015619	Gata3	protein_coding	ensembl_havana	9857078	9890034
608.323	-0.604769	0.511564	-1.1822	0.237128	0.632785	Diet_Effect	ENSMUSG00000015627	Gata5	protein_coding	ensembl_havana	180325133	180334699
8678.58	-0.388812	0.121027	-3.21262	0.0013153	0.0262591	Diet_Effect	ENSMUSG00000015647	Lama5	protein_coding	ensembl_havana	180176373	180225859
151.073	-0.771306	0.325937	-2.36643	0.0179607	0.156693	Diet_Effect	ENSMUSG00000015652	Steap1	protein_coding	ensembl_havana	5736317	5749326
1558.83	-0.132741	0.117452	-1.13018	0.258401	0.654381	Diet_Effect	ENSMUSG00000015653	Steap2	protein_coding	ensembl_havana	5664829	5694578
248917	-0.189914	0.163659	-1.16042	0.245876	0.642357	Diet_Effect	ENSMUSG00000015656	Hspa8	protein_coding	ensembl_havana	40800984	40810087
194.944	-0.165539	0.240641	-0.687907	0.491512	0.838274	Diet_Effect	ENSMUSG00000015659	Serac1	protein_coding	ensembl_havana	6042196	6079741
1639.26	0.131948	0.115899	1.13847	0.254923	0.650053	Diet_Effect	ENSMUSG00000015668	Pdzd11	protein_coding	ensembl_havana	100622883	100626568
8743.13	-0.0296834	0.0979135	-0.30316	0.761768	0.944893	Diet_Effect	ENSMUSG00000015671	Psma2	protein_coding	ensembl_havana	14613240	14674236
1773.17	-0.135289	0.114501	-1.18155	0.237382	0.633123	Diet_Effect	ENSMUSG00000015672	Mrpl32	protein_coding	ensembl_havana	14608184	14613165
1516.85	0.0238137	0.145658	0.16349	0.870132	0.976282	Diet_Effect	ENSMUSG00000015697	Setdb1	protein_coding	ensembl_havana	95323525	95357202
2611.47	0.112521	0.128528	0.875462	0.381323	0.764053	Diet_Effect	ENSMUSG00000015702	Anxa9	protein_coding	ensembl_havana	95296096	95307176
34.7567	0.647182	0.662059	0.977529	0.328308	0.72115	Diet_Effect	ENSMUSG00000015709	Arnt2	protein_coding	ensembl_havana	84246278	84410176
1760.29	0.0325855	0.123209	0.264474	0.791415	0.954328	Diet_Effect	ENSMUSG00000015711	Prune1	protein_coding	ensembl_havana	95253674	95282076
15914.7	-0.119131	0.0840569	-1.41727	0.156404	0.520792	Diet_Effect	ENSMUSG00000015714	Cers2	protein_coding	ensembl_havana	95314791	95323599
1.43709	1.53048	2.79139	0.548286	0.583496		Diet_Effect	ENSMUSG00000015721	Nlrp5	protein_coding	ensembl_havana	23385889	23441922
9794.9	-0.0661998	0.0869877	-0.761025	0.446642	0.811185	Diet_Effect	ENSMUSG00000015733	Capza2	protein_coding	ensembl_havana	17636234	17666972
22.5212	-0.5919	0.63083	-0.938288	0.348097	0.739949	Diet_Effect	ENSMUSG00000015745	Plekho1	protein_coding	ensembl_havana	95988429	95996001
1320.76	0.256779	0.126138	2.0357	0.0417808	0.262681	Diet_Effect	ENSMUSG00000015747	Vps45	protein_coding	ensembl_havana	95999832	96058466
1825.06	-0.0625326	0.122896	-0.508827	0.610873	0.897596	Diet_Effect	ENSMUSG00000015748	Prpf3	protein_coding	ensembl_havana	95830124	95855885
2942.08	0.0243251	0.104514	0.232745	0.81596	0.96088	Diet_Effect	ENSMUSG00000015749	Anp32e	protein_coding	ensembl_havana	95929246	95947390
785.368	0.256314	0.142525	1.79837	0.0721179	0.352872	Diet_Effect	ENSMUSG00000015750	Aph1a	protein_coding	ensembl_havana	95893969	95898288
1601.29	-0.169729	0.160527	-1.05733	0.290362	0.687366	Diet_Effect	ENSMUSG00000015755	Tab2	protein_coding	ensembl_havana	7905653	7956230
2155.16	0.156413	0.117896	1.32671	0.184606	0.566484	Diet_Effect	ENSMUSG00000015757	Ppil4	protein_coding	ensembl_havana	7792891	7823135
2068.84	0.0674003	0.121311	0.555601	0.578484	0.88128	Diet_Effect	ENSMUSG00000015759	Cnih1	protein_coding	ensembl_havana	46775567	46788411
3108.66	-0.926084	0.418454	-2.21311	0.0268903	0.200642	Diet_Effect	ENSMUSG00000015766	Eps8	protein_coding	ensembl_havana	137477245	137654876
1772.18	0.106913	0.145726	0.733659	0.463157	0.820508	Diet_Effect	ENSMUSG00000015776	Med22	protein_coding	ensembl_havana	26905262	26910677
21.0043	-1.88363	0.963071	-1.95585	0.0504826	0.29172	Diet_Effect	ENSMUSG00000015787	Abo	protein_coding	ensembl_havana	26842503	26864979
2050.65	-0.0186322	0.112586	-0.165492	0.868557	0.975525	Diet_Effect	ENSMUSG00000015790	Surf1	protein_coding	ensembl_havana	26913381	26916530
5571.34	-0.0540247	0.104568	-0.516645	0.605404	0.895363	Diet_Effect	ENSMUSG00000015804	Med28	protein_coding	ensembl_havana	45520229	45529276
2219.93	0.147574	0.106337	1.3878	0.165198	0.537447	Diet_Effect	ENSMUSG00000015806	Qdpr	protein_coding	ensembl_havana	45434021	45450236
9.49654	-1.37283	1.09819	-1.25009	0.211266	0.600678	Diet_Effect	ENSMUSG00000015812	Gnrh1	protein_coding	ensembl_havana	67745181	67749439
1.38159	-0.38229	3.32581	-0.114947	0.908487		Diet_Effect	ENSMUSG00000015829	Tnr	protein_coding	ensembl_havana	159523769	159931729
119712	-0.387141	0.0938501	-4.1251	3.70578e-05	0.00163365	Diet_Effect	ENSMUSG00000015837	Sqstm1	protein_coding	ensembl_havana	50199366	50210827
17385.6	0.0144238	0.0931696	0.154812	0.876969	0.977438	Diet_Effect	ENSMUSG00000015839	Nfe2l2	protein_coding	ensembl_havana	75675513	75704641
69.0093	1.03548	0.439644	2.35527	0.0185093	0.159602	Diet_Effect	ENSMUSG00000015843	Rxrg	protein_coding	ensembl_havana	167598384	167639623
1233.81	0.236567	0.16267	1.45428	0.145869	0.504303	Diet_Effect	ENSMUSG00000015846	Rxra	protein_coding	ensembl_havana	27676440	27762957
3107.07	-0.0129134	0.123669	-0.104419	0.916837	0.987168	Diet_Effect	ENSMUSG00000015850	Adamtsl4	protein_coding	ensembl_havana	95676201	95687917
3.34893	1.91699	2.2686	0.845012	0.398104		Diet_Effect	ENSMUSG00000015854	Cd5l	protein_coding	ensembl_havana	87357881	87371073
4915.35	0.00563887	0.0885406	0.0636868	0.94922	0.991809	Diet_Effect	ENSMUSG00000015869	Prpsap1	protein_coding	ensembl_havana	116470845	116494202
5.94487	1.18367	1.52751	0.774901	0.438398		Diet_Effect	ENSMUSG00000015879	Fam184b	protein_coding	ensembl_havana	45529705	45639614
54.9967	2.06543	0.640514	3.22464	0.00126131	0.0253182	Diet_Effect	ENSMUSG00000015880	Ncapg	protein_coding	ensembl_havana	45669919	45700546
1059.5	0.144131	0.125817	1.14556	0.251977	0.648112	Diet_Effect	ENSMUSG00000015882	Lcorl	protein_coding	ensembl_havana	45697181	45857615
4208.27	0.00996663	0.0899239	0.110834	0.911748	0.986424	Diet_Effect	ENSMUSG00000015889	Lta4h	protein_coding	ensembl_havana	93453411	93484875
217.021	-0.0995944	0.24349	-0.409028	0.682519	0.921308	Diet_Effect	ENSMUSG00000015890	Amdhd1	protein_coding	ensembl_havana	93523338	93540033
31340	-0.0783042	0.0948821	-0.825279	0.409213	0.783898	Diet_Effect	ENSMUSG00000015932	Dstn	protein_coding	ensembl_havana	143915320	143943324
2082.6	0.0200684	0.13796	0.145466	0.884343	0.978549	Diet_Effect	ENSMUSG00000015937	Macroh2a1	protein_coding	ensembl_havana	56073619	56136361
392.465	0.104236	0.20275	0.514112	0.607174	0.895954	Diet_Effect	ENSMUSG00000015942	Gtf2ird2	protein_coding	ensembl_havana	134184019	134224355
719.223	0.0332307	0.140782	0.236044	0.813399	0.960124	Diet_Effect	ENSMUSG00000015943	Bola1	protein_coding	ensembl_havana	96196588	96219709
238.298	0.344831	0.298999	1.15328	0.248794	0.645889	Diet_Effect	ENSMUSG00000015944	Castor2	protein_coding	ensembl_havana	134099711	134144343
8.24732	-0.853775	1.23564	-0.690958	0.489592	0.836971	Diet_Effect	ENSMUSG00000015950	Ncf1	protein_coding	ensembl_havana	134220053	134229625
13.2525	-1.91149	0.899264	-2.12562	0.033535	0.231355	Diet_Effect	ENSMUSG00000015957	Wnt11	protein_coding	ensembl_havana	98835112	98855195
5785.84	-0.227148	0.0831548	-2.73163	0.00630218	0.0785194	Diet_Effect	ENSMUSG00000015961	Adss	protein_coding	ensembl_havana	177762962	177796511
82.6879	-0.211212	0.369997	-0.570847	0.568103	0.876534	Diet_Effect	ENSMUSG00000015962	1700016C15Rik	protein_coding	ensembl_havana	177729814	177753324
632.544	-0.162948	0.144408	-1.12839	0.259157	0.655488	Diet_Effect	ENSMUSG00000015966	Il17rb	protein_coding	ensembl_havana	29996135	30008896
161.965	0.0471237	0.292877	0.160899	0.872173	0.976282	Diet_Effect	ENSMUSG00000015968	Cacna1d	protein_coding	ensembl_havana	30039939	30491455
3504.45	0.156309	0.127876	1.22235	0.221576	0.614664	Diet_Effect	ENSMUSG00000015970	Chdh	protein_coding	ensembl_havana	30009023	30040527
3477.99	-0.0625879	0.110119	-0.568365	0.569787	0.877109	Diet_Effect	ENSMUSG00000015971	Actr8	protein_coding	ensembl_havana	29978337	30006354
152.28	-0.0386069	0.337491	-0.114394	0.908926	0.985644	Diet_Effect	ENSMUSG00000015980	Lrrc27	protein_coding	ensembl_havana	139212988	139242979
7.34736	-4.45389	1.74691	-2.54959	0.010785	0.112726	Diet_Effect	ENSMUSG00000015981	Stk32c	protein_coding	ensembl_havana	139103638	139213307
2357.09	-0.152849	0.368095	-0.415242	0.677964	0.919796	Diet_Effect	ENSMUSG00000015994	Fnta	protein_coding	ensembl_havana	25998722	26015650
2077.48	0.132421	0.114721	1.15429	0.248381	0.645399	Diet_Effect	ENSMUSG00000016018	Mtrex	protein_coding	ensembl_havana	112867418	112927398
2568.93	-0.624586	0.160684	-3.88704	0.000101473	0.00360276	Diet_Effect	ENSMUSG00000016024	Lbp	protein_coding	ensembl_havana	158306493	158332852
665.684	-0.0262437	0.150957	-0.173849	0.861984	0.97339	Diet_Effect	ENSMUSG00000016028	Celsr1	protein_coding	ensembl_havana	85898929	86034203
12.9738	0.533816	1.18301	0.451237	0.651819	0.912041	Diet_Effect	ENSMUSG00000016087	Fli1	protein_coding	ensembl_havana	32422204	32542861
2615.57	-0.00112525	0.109285	-0.0102965	0.991785	0.998919	Diet_Effect	ENSMUSG00000016128	Stard13	protein_coding	ensembl_havana	151037510	151233836
23.6175	0.690623	0.704418	0.980417	0.326881	0.719301	Diet_Effect	ENSMUSG00000016150	Tenm1	protein_coding	ensembl_havana	42527866	43429126
6.57432	2.18709	1.42129	1.5388	0.123852		Diet_Effect	ENSMUSG00000016179	Camk1g	protein_coding	ensembl_havana	193346346	193370298
373.038	-0.305035	0.19196	-1.58906	0.112048	0.445201	Diet_Effect	ENSMUSG00000016181	Utp25	protein_coding	ensembl_havana	193091104	193130272
702.347	-1.76835	0.204067	-8.66557	4.49253e-18	3.94209e-15	Diet_Effect	ENSMUSG00000016194	Hsd11b1	protein_coding	ensembl_havana	193221634	193264075
71.1602	1.09576	0.394656	2.77649	0.00549487	0.0723759	Diet_Effect	ENSMUSG00000016200	Syt14	protein_coding	ensembl_havana	192891233	193035775
695.802	0.207119	0.147945	1.39997	0.161522	0.530925	Diet_Effect	ENSMUSG00000016206	H2-M3	protein_coding	ensembl_havana	37270220	37274484
755.049	-0.571493	0.226011	-2.5286	0.0114517	0.117168	Diet_Effect	ENSMUSG00000016239	Lonrf3	protein_coding	ensembl_havana	36328353	36362341
1826.59	-0.27881	0.142756	-1.95305	0.0508131	0.292513	Diet_Effect	ENSMUSG00000016252	Atp5e	protein_coding	ensembl_havana	174461072	174464105
1676.33	0.252474	0.116079	2.17502	0.0296286	0.213554	Diet_Effect	ENSMUSG00000016253	Nelfcd	protein_coding	ensembl_havana	174415804	174427502
2.47224	0.278684	3.20407	0.086978	0.930689		Diet_Effect	ENSMUSG00000016255	Tubb1	protein_coding	ensembl_havana	174450695	174457882
8207.36	-0.0867978	0.0992866	-0.874215	0.382001	0.76441	Diet_Effect	ENSMUSG00000016256	Ctsz	protein_coding	ensembl_havana	174427493	174439039
1296.6	-0.224801	0.120671	-1.86292	0.0624733	0.327199	Diet_Effect	ENSMUSG00000016257	Prelid3b	protein_coding	ensembl_havana	174465067	174473081
638.231	-0.39478	0.278515	-1.41744	0.156353	0.520715	Diet_Effect	ENSMUSG00000016262	Sertad4	protein_coding	ensembl_havana	192844488	192855756
18.9449	0.536589	0.690603	0.776987	0.437166	0.804842	Diet_Effect	ENSMUSG00000016283	H2-M2	protein_coding	ensembl_havana	37480851	37483552
2199.57	0.0894998	0.118272	0.756727	0.449213	0.812092	Diet_Effect	ENSMUSG00000016308	Ube2a	protein_coding	ensembl_havana	36873900	36884222
20317.2	-0.217955	0.110437	-1.97358	0.0484296	0.285298	Diet_Effect	ENSMUSG00000016319	Slc25a5	protein_coding	ensembl_havana	36795651	36798807
1.18425	1.41196	3.32474	0.424683	0.671068		Diet_Effect	ENSMUSG00000016327	Atp1b4	protein_coding	ensembl_havana	38316184	38336769
4461.8	0.0351029	0.0899915	0.390069	0.696486	0.92603	Diet_Effect	ENSMUSG00000016344	Ppdpf	protein_coding	ensembl_havana	181187247	181188771
9.91334	-1.69245	1.23937	-1.36558	0.17207	0.547883	Diet_Effect	ENSMUSG00000016346	Kcnq2	protein_coding	ensembl_havana	181075579	181135300
68.8714	-0.169324	0.400342	-0.422948	0.672333	0.91841	Diet_Effect	ENSMUSG00000016356	Col20a1	protein_coding	ensembl_havana	180986535	181018363
4722.92	-0.108703	0.110344	-0.985131	0.32456	0.717166	Diet_Effect	ENSMUSG00000016382	Pls3	protein_coding	ensembl_havana	75785654	75875182
408.344	0.337833	0.207172	1.63069	0.102956	0.424709	Diet_Effect	ENSMUSG00000016386	Mpped2	protein_coding	ensembl_havana	106693269	106868356
847.768	0.037898	0.157446	0.240705	0.809784	0.958809	Diet_Effect	ENSMUSG00000016409	Nkap	protein_coding	ensembl_havana	37126795	37150746
2106.31	-0.237829	0.147332	-1.61424	0.106476	0.432077	Diet_Effect	ENSMUSG00000016427	Ndufa1	protein_coding	ensembl_havana	37187588	37191163
157.352	-0.252698	0.35018	-0.721624	0.470526	0.825757	Diet_Effect	ENSMUSG00000016458	Wt1	protein_coding	ensembl_havana	105126529	105173616
127.099	0.624229	0.334693	1.86508	0.0621704	0.326679	Diet_Effect	ENSMUSG00000016477	E2f3	protein_coding	ensembl_havana	29906575	29986063
4083.73	0.0483751	0.0973355	0.496993	0.619194	0.900188	Diet_Effect	ENSMUSG00000016481	Cr1l	protein_coding	ensembl_havana	195097382	195131586
4228.5	-0.24486	0.0891685	-2.74603	0.00603204	0.0763785	Diet_Effect	ENSMUSG00000016487	Ppfibp1	protein_coding	ensembl_havana	146888487	147032025
60.5395	-0.13798	0.422795	-0.326351	0.744159	0.940137	Diet_Effect	ENSMUSG00000016493	Cd46	protein_coding	ensembl_havana	195036826	195092249
256.726	-2.40947	0.39191	-6.14803	7.84494e-10	1.44559e-07	Diet_Effect	ENSMUSG00000016494	Cd34	protein_coding	ensembl_havana	194938819	194961279
1698.03	0.132657	0.119839	1.10696	0.26831	0.665084	Diet_Effect	ENSMUSG00000016495	Plgrkt	protein_coding	ensembl_havana	29348599	29367390
191.486	0.318302	0.276378	1.15169	0.249449	0.646952	Diet_Effect	ENSMUSG00000016496	Cd274	protein_coding	ensembl_havana	29367455	29388095
1.17979	0.73671	3.36109	0.219187	0.826504		Diet_Effect	ENSMUSG00000016498	Pdcd1lg2	protein_coding	ensembl_havana	29410919	29471161
208.139	0.0747392	0.241044	0.310065	0.756512	0.94363	Diet_Effect	ENSMUSG00000016503	Gtf3a	protein_coding	ensembl_havana	146948657	146955614
675.478	0.168454	0.156156	1.07875	0.280698	0.678188	Diet_Effect	ENSMUSG00000016510	Mtif3	protein_coding	ensembl_havana	146951573	146963800
3548.38	-0.350646	0.115826	-3.02735	0.00246712	0.041404	Diet_Effect	ENSMUSG00000016520	Lnx2	protein_coding	ensembl_havana	147016655	147076586
4.58122	-2.97942	1.97506	-1.50852	0.131422		Diet_Effect	ENSMUSG00000016524	Il19	protein_coding	ensembl_havana	130932656	130940115
487.205	-0.000596482	0.251594	-0.00237082	0.998108	0.999684	Diet_Effect	ENSMUSG00000016526	Dyrk3	protein_coding	ensembl_havana	131127455	131138340
2432.62	-0.0534848	0.161034	-0.332133	0.739789	0.938703	Diet_Effect	ENSMUSG00000016528	Mapkapk2	protein_coding	ensembl_havana	131053700	131097826
3.86081	-1.64567	2.09211	-0.786607	0.431512		Diet_Effect	ENSMUSG00000016529	Il10	protein_coding	ensembl_havana	131019845	131024974
16785.4	-0.0547631	0.0866221	-0.632206	0.527252	0.857538	Diet_Effect	ENSMUSG00000016534	Lamp2	protein_coding	ensembl_havana	38401357	38456454
11827.6	0.00349823	0.0852109	0.0410537	0.967253	0.994674	Diet_Effect	ENSMUSG00000016541	Atxn10	protein_coding	ensembl_havana	85336245	85463212
612.037	0.0932091	0.212392	0.438854	0.660767	0.914529	Diet_Effect	ENSMUSG00000016552	Foxred2	protein_coding	ensembl_havana	77940522	77956722
2003.17	-0.100847	0.109068	-0.924623	0.355162	0.746606	Diet_Effect	ENSMUSG00000016554	Eif3d	protein_coding	ensembl_havana	77958998	77970813
139767	0.0208675	0.121288	0.172049	0.863399	0.973731	Diet_Effect	ENSMUSG00000016559	H3f3b	protein_coding	ensembl_havana	116021912	116027962
3490.2	-0.074931	0.0902879	-0.829912	0.406589	0.782631	Diet_Effect	ENSMUSG00000016619	Nup50	protein_coding	ensembl_havana	84923411	84942963
8.43638	0.0175389	0.985413	0.0177985	0.9858	0.998573	Diet_Effect	ENSMUSG00000016624	Phf21b	protein_coding	ensembl_havana	84785381	84856049
1912.28	0.370384	0.112486	3.29272	0.000992231	0.021113	Diet_Effect	ENSMUSG00000016637	Ift27	protein_coding	ensembl_havana	78159463	78174107
12501	-0.00993752	0.100189	-0.0991879	0.920989	0.987548	Diet_Effect	ENSMUSG00000016664	Pacsin2	protein_coding	ensembl_havana	83375607	83464606
1.80962	1.80479	3.34557	0.539459	0.589571		Diet_Effect	ENSMUSG00000016756	Cmah	protein_coding	ensembl_havana	24327404	24477377
1415.97	-0.0668803	0.135374	-0.494039	0.621278	0.900795	Diet_Effect	ENSMUSG00000016757	Ttll12	protein_coding	ensembl_havana	83575090	83595157
915.883	-0.109879	0.134707	-0.815689	0.414678	0.787516	Diet_Effect	ENSMUSG00000016758	Bik	protein_coding	ensembl_havana	83526862	83544634
6.33501	-5.08443	2.25443	-2.25531	0.0241141		Diet_Effect	ENSMUSG00000016763	Scube1	protein_coding	ensembl_havana	83604999	83725021
5116.47	-0.0909145	0.11085	-0.820158	0.412126	0.785606	Diet_Effect	ENSMUSG00000016831	Tox4	protein_coding	ensembl_havana	52279146	52296401
702.853	-0.108822	0.14283	-0.761898	0.446121	0.811065	Diet_Effect	ENSMUSG00000016833	Mrps18c	protein_coding	ensembl_havana	100798627	100804471
58.6263	-2.75223	0.490484	-5.61125	2.00865e-08	2.55265e-06	Diet_Effect	ENSMUSG00000016918	Sulf1	protein_coding	ensembl_havana	12692277	12861192
6311.71	0.055095	0.0944114	0.583563	0.559515	0.872968	Diet_Effect	ENSMUSG00000016921	Srsf6	protein_coding	ensembl_havana	162931528	162937121
871.139	0.163446	0.186291	0.877369	0.380286	0.763253	Diet_Effect	ENSMUSG00000016933	Plcg1	protein_coding	ensembl_havana	160731300	160775760
190.204	-0.210803	0.273747	-0.770066	0.441261	0.808029	Diet_Effect	ENSMUSG00000016940	Kctd2	protein_coding	ensembl_havana	115420128	115431274
4675.75	-0.158828	0.115562	-1.3744	0.169317	0.543766	Diet_Effect	ENSMUSG00000016942	Tmprss6	protein_coding	ensembl_havana	78439667	78468634
1629.89	-0.216724	0.152319	-1.42283	0.154784	0.519098	Diet_Effect	ENSMUSG00000016946	Kctd5	protein_coding	ensembl_havana	24047734	24073485
321.487	-0.0257944	0.269021	-0.0958825	0.923614	0.988008	Diet_Effect	ENSMUSG00000016984	Etaa1	protein_coding	ensembl_havana	17938756	17953875
100.063	-0.936939	0.381848	-2.4537	0.0141396	0.133536	Diet_Effect	ENSMUSG00000016995	Matn4	protein_coding	ensembl_havana	164389393	164405160
163.412	-1.20293	0.30693	-3.91924	8.88278e-05	0.00327366	Diet_Effect	ENSMUSG00000017002	Slpi	protein_coding	ensembl_havana	164354070	164389095
15.2603	-0.23842	1.00912	-0.236266	0.813227	0.960044	Diet_Effect	ENSMUSG00000017007	Rbpjl	protein_coding	ensembl_havana	164403141	164415448
91715.4	-0.0485848	0.128219	-0.37892	0.704747	0.928082	Diet_Effect	ENSMUSG00000017009	Sdc4	protein_coding	ensembl_havana	164424247	164443887
9402.91	-0.0875471	0.0946461	-0.924995	0.354969	0.746401	Diet_Effect	ENSMUSG00000017057	Il13ra1	protein_coding	ensembl_havana	36112110	36171259
6170.74	0.0227181	0.102176	0.222343	0.824047	0.963203	Diet_Effect	ENSMUSG00000017119	Nbr1	protein_coding	ensembl_havana	101552149	101581951
1520.4	-0.0545218	0.128637	-0.423841	0.671682	0.918342	Diet_Effect	ENSMUSG00000017132	Cyth1	protein_coding	ensembl_havana	118132019	118248592
13110.4	-0.19104	0.144866	-1.31874	0.187257	0.569998	Diet_Effect	ENSMUSG00000017144	Rnd3	protein_coding	ensembl_havana	51130438	51149111
59.6275	1.78728	0.48721	3.6684	0.00024407	0.00723177	Diet_Effect	ENSMUSG00000017146	Brca1	protein_coding	ensembl_havana	101488764	101551955
1.31061	0.0884335	3.3384	0.0264898	0.978867		Diet_Effect	ENSMUSG00000017165	Gast	protein_coding	ensembl_havana	100334407	100336996
56.023	0.508979	0.431695	1.17903	0.238388	0.634061	Diet_Effect	ENSMUSG00000017167	Cntnap1	protein_coding	ensembl_havana	101170523	101190724
2788.47	0.211816	0.0985746	2.14879	0.0316508	0.223032	Diet_Effect	ENSMUSG00000017176	Nt5c3b	protein_coding	ensembl_havana	100422321	100441808
3266.13	-0.0321553	0.135612	-0.237113	0.812569	0.95973	Diet_Effect	ENSMUSG00000017188	Coa3	protein_coding	ensembl_havana	101277968	101279114
2.45421	0.370428	3.31465	0.111755	0.911018		Diet_Effect	ENSMUSG00000017204	Gsdma	protein_coding	ensembl_havana	98664351	98677708
1698.48	0.186624	0.15878	1.17536	0.23985	0.636684	Diet_Effect	ENSMUSG00000017210	Med24	protein_coding	ensembl_havana	98704591	98729435
4506.83	0.00268779	0.0883529	0.0304211	0.975731	0.997105	Diet_Effect	ENSMUSG00000017221	Psmd3	protein_coding	ensembl_havana	98682554	98695979
3153.59	0.0853281	0.0991011	0.86102	0.389227	0.770769	Diet_Effect	ENSMUSG00000017264	Exosc10	protein_coding	ensembl_havana	148558429	148582401
5238.39	0.123149	0.0893492	1.37829	0.168115	0.542342	Diet_Effect	ENSMUSG00000017286	Glod4	protein_coding	ensembl_havana	76120987	76243725
1901.82	0.111505	0.122392	0.91105	0.362269	0.751863	Diet_Effect	ENSMUSG00000017288	Vps53	protein_coding	ensembl_havana	76046226	76179647
2935.13	-0.122858	0.141536	-0.868032	0.385377	0.767318	Diet_Effect	ENSMUSG00000017291	Taok1	protein_coding	ensembl_havana	77529162	77607815
163.73	-0.29985	0.259291	-1.15642	0.247509	0.644643	Diet_Effect	ENSMUSG00000017299	Dnttip1	protein_coding	ensembl_havana	164745983	164768607
887.13	-0.0719284	0.138584	-0.519025	0.603743	0.894518	Diet_Effect	ENSMUSG00000017307	Acot8	protein_coding	ensembl_havana	164792765	164804882
37.5255	-0.282397	0.616755	-0.457875	0.647042	0.91045	Diet_Effect	ENSMUSG00000017309	Cd300lg	protein_coding	ensembl_havana	102041509	102055620
32.4068	0.736924	2.81271	0.261998	0.793323	0.954716	Diet_Effect	ENSMUSG00000017311	Pyy	protein_coding	ensembl_havana	102106676	102107832
1028.72	-0.414429	0.170126	-2.436	0.0148505	0.138068	Diet_Effect	ENSMUSG00000017314	Mpp2	protein_coding	ensembl_havana	102057015	102088515
354.206	-2.27903	1.95274	-1.16709	0.243173	0.639124	Diet_Effect	ENSMUSG00000017316	Ppy	protein_coding	ensembl_havana	102099930	102101319
12489.1	0.488575	0.0931439	5.24538	1.55959e-07	1.7005e-05	Diet_Effect	ENSMUSG00000017344	Vtn	protein_coding	ensembl_havana	78499091	78502324
190.578	-0.150906	0.286031	-0.527585	0.597787	0.891166	Diet_Effect	ENSMUSG00000017376	Nlk	protein_coding	ensembl_havana	78567168	78697373
4882.86	-0.0484404	0.143389	-0.337824	0.735496	0.938242	Diet_Effect	ENSMUSG00000017386	Traf4	protein_coding	ensembl_havana	78158499	78165589
3816.86	-0.0840207	0.142443	-0.589857	0.555287	0.870408	Diet_Effect	ENSMUSG00000017390	Aldoc	protein_coding	ensembl_havana	78322968	78327781
5.07527	-1.16992	1.26572	-0.924308	0.355326		Diet_Effect	ENSMUSG00000017400	Stac2	protein_coding	ensembl_havana	98036623	98053462
6572.14	-0.031495	0.114207	-0.275772	0.782724	0.950703	Diet_Effect	ENSMUSG00000017404	Rpl19	protein_coding	ensembl_havana	98026710	98030492
1748.98	0.34088	0.11883	2.86864	0.00412242	0.0599556	Diet_Effect	ENSMUSG00000017405	Nek8	protein_coding	ensembl_havana	78166106	78176675
68.6732	0.0185726	0.402805	0.0461081	0.963224	0.993881	Diet_Effect	ENSMUSG00000017412	Cacnb4	protein_coding	ensembl_havana	52428320	52676831
100.638	0.269231	0.35965	0.748593	0.454102	0.814537	Diet_Effect	ENSMUSG00000017417	Plxdc1	protein_coding	ensembl_havana	97923238	97986444
2427.87	-0.131035	0.159538	-0.821345	0.41145	0.785433	Diet_Effect	ENSMUSG00000017418	Arl5b	protein_coding	ensembl_havana	15049395	15082456
7845.41	-0.0155844	0.0805958	-0.193364	0.846674	0.969022	Diet_Effect	ENSMUSG00000017421	Zfp207	protein_coding	ensembl_havana	80383279	80405733
8793.57	-0.110277	0.0892014	-1.23627	0.21636	0.607777	Diet_Effect	ENSMUSG00000017428	Psmd11	protein_coding	ensembl_havana	80428615	80473248
73.3891	-0.902712	0.4906	-1.84002	0.0657657	0.335325	Diet_Effect	ENSMUSG00000017446	C1qtnf1	protein_coding	ensembl_havana	118428203	118449963
6158.94	0.105992	0.0933225	1.13576	0.256056	0.651525	Diet_Effect	ENSMUSG00000017453	Pipox	protein_coding	ensembl_havana	77880615	77894096
4145.52	-0.00252466	0.137313	-0.0183862	0.985331	0.998573	Diet_Effect	ENSMUSG00000017466	Timp2	protein_coding	ensembl_havana	118301069	118355740
1805.14	-0.0217287	0.143813	-0.15109	0.879905	0.978056	Diet_Effect	ENSMUSG00000017478	Zc3h18	protein_coding	ensembl_havana	122376609	122417360
1517.27	0.132479	0.162437	0.815574	0.414744	0.78756	Diet_Effect	ENSMUSG00000017485	Top2b	protein_coding	ensembl_havana	16365179	16435462
492.033	0.168864	0.185546	0.910093	0.362774	0.752034	Diet_Effect	ENSMUSG00000017491	Rarb	protein_coding	ensembl_havana	16430839	16819156
790.561	-0.615971	0.231714	-2.65832	0.00785311	0.0903304	Diet_Effect	ENSMUSG00000017493	Igfbp4	protein_coding	ensembl_havana	99041244	99054392
273.259	0.214003	0.255305	0.838222	0.401906	0.779954	Diet_Effect	ENSMUSG00000017499	Cdc6	protein_coding	ensembl_havana	98907801	98923940
587.793	0.0368947	0.193683	0.19049	0.848925	0.969195	Diet_Effect	ENSMUSG00000017548	Suz12	protein_coding	ensembl_havana	79993106	80034123
122.735	0.773701	0.326504	2.36965	0.0178049	0.155789	Diet_Effect	ENSMUSG00000017550	Atad5	protein_coding	ensembl_havana	80089400	80135794
647.616	0.234787	0.164444	1.42776	0.15336	0.517101	Diet_Effect	ENSMUSG00000017561	Crlf3	protein_coding	ensembl_havana	80046493	80080991
36.8431	1.03513	0.846753	1.22247	0.221531	0.614664	Diet_Effect	ENSMUSG00000017607	Tns4	protein_coding	ensembl_havana	99065678	99089306
7371.33	-0.0363492	0.0964999	-0.376676	0.706415	0.928741	Diet_Effect	ENSMUSG00000017615	Tnfaip1	protein_coding	ensembl_havana	78522850	78536332
3718.62	-0.222492	0.101343	-2.19545	0.0281315	0.20587	Diet_Effect	ENSMUSG00000017631	Abr	protein_coding	ensembl_havana	76416734	76623558
1642.07	0.240322	0.111488	2.15558	0.0311161	0.220955	Diet_Effect	ENSMUSG00000017639	Rab11fip4	protein_coding	ensembl_havana	79591212	79698023
9.93867	-1.0273	1.00323	-1.02399	0.30584	0.700802	Diet_Effect	ENSMUSG00000017652	Cd40	protein_coding	ensembl_havana	165055627	165072948
1481.61	0.190427	0.114904	1.65728	0.0974628	0.412999	Diet_Effect	ENSMUSG00000017664	Slc35c2	protein_coding	ensembl_havana	165276554	165287869
381.151	2.9134e-06	0.197706	1.4736e-05	0.999988	0.999988	Diet_Effect	ENSMUSG00000017667	Zfp334	protein_coding	ensembl_havana	165374264	165388259
2338.11	0.138832	0.107047	1.29693	0.194655	0.57975	Diet_Effect	ENSMUSG00000017670	Elmo2	protein_coding	ensembl_havana	165288031	165326479
16685.4	-0.0214347	0.110987	-0.193127	0.846859	0.969022	Diet_Effect	ENSMUSG00000017677	Wsb1	protein_coding	ensembl_havana	79239372	79254671
678.035	-0.0843208	0.169579	-0.497236	0.619023	0.900095	Diet_Effect	ENSMUSG00000017679	Ttpal	protein_coding	ensembl_havana	163602314	163619013
2746.34	0.0200761	0.106339	0.188793	0.850255	0.969833	Diet_Effect	ENSMUSG00000017686	Rhot1	protein_coding	ensembl_havana	80209019	80267907
836.617	0.547888	0.161731	3.38765	0.000704948	0.0164739	Diet_Effect	ENSMUSG00000017688	Hnf4g	protein_coding	ensembl_havana	3508030	3658052
160.888	-0.480704	0.313641	-1.53266	0.12536	0.471334	Diet_Effect	ENSMUSG00000017692	Rhbdl3	protein_coding	ensembl_havana	80300912	80355955
122.566	-1.35625	0.329072	-4.12145	3.76502e-05	0.00164021	Diet_Effect	ENSMUSG00000017697	Ada	protein_coding	ensembl_havana	163726584	163750239
15518.3	-0.15867	0.0951981	-1.66674	0.0955662	0.408584	Diet_Effect	ENSMUSG00000017707	Serinc3	protein_coding	ensembl_havana	163623272	163645131
336.305	0.610234	0.259372	2.35274	0.0186357	0.160309	Diet_Effect	ENSMUSG00000017713	Tha1	protein_coding	ensembl_havana	117867952	117873481
1622.17	-0.229381	0.127756	-1.79546	0.0725796	0.353629	Diet_Effect	ENSMUSG00000017715	Pgs1	protein_coding	ensembl_havana	117986292	118024011
188.509	0.672914	0.32121	2.09493	0.0361768	0.240835	Diet_Effect	ENSMUSG00000017716	Birc5	protein_coding	ensembl_havana	117849251	117855743
170.131	-0.194105	0.246621	-0.78706	0.431247	0.800501	Diet_Effect	ENSMUSG00000017718	Afmid	protein_coding	ensembl_havana	117825924	117839908
5.11222	0.84332	1.15725	0.72873	0.466167		Diet_Effect	ENSMUSG00000017720	Trp53tg5	protein_coding	ensembl_havana	164470301	164473724
2177.71	0.269949	0.111316	2.42508	0.0153051	0.140732	Diet_Effect	ENSMUSG00000017721	Pigt	protein_coding	ensembl_havana	164497520	164508301
7846.25	-0.672505	0.125824	-5.3448	9.05176e-08	1.03601e-05	Diet_Effect	ENSMUSG00000017723	Wfdc2	protein_coding	ensembl_havana	164562413	164568510
523.246	0.334052	0.208726	1.60043	0.109503	0.438178	Diet_Effect	ENSMUSG00000017724	Etv4	protein_coding	ensembl_havana	101769742	101785371
101.246	-0.321975	0.349487	-0.921279	0.356905	0.747204	Diet_Effect	ENSMUSG00000017734	Dbndd2	protein_coding	ensembl_havana	164486106	164493319
1.22364	-1.75579	3.36932	-0.52111	0.60229		Diet_Effect	ENSMUSG00000017737	Mmp9	protein_coding	ensembl_havana	164940780	164955850
22.7977	-0.993161	0.630373	-1.57551	0.115138	0.451415	Diet_Effect	ENSMUSG00000017740	Slc12a5	protein_coding	ensembl_havana	164960802	164999731
1557.24	0.0247765	0.122308	0.202574	0.839468	0.966805	Diet_Effect	ENSMUSG00000017747	Ghdc	protein_coding	ensembl_havana	100766032	100770957
302.5	-2.29154	0.336217	-6.81567	9.38245e-12	3.08733e-09	Diet_Effect	ENSMUSG00000017754	Pltp	protein_coding	ensembl_havana	164839518	164857711
5004.35	0.00595606	0.115442	0.0515935	0.958853	0.993443	Diet_Effect	ENSMUSG00000017756	Slc12a7	protein_coding	ensembl_havana	73733094	73816754
6483.88	-0.0224697	0.10443	-0.215165	0.829639	0.9635	Diet_Effect	ENSMUSG00000017760	Ctsa	protein_coding	ensembl_havana	164832873	164841032
704.822	0.101899	0.151496	0.672621	0.501188	0.844508	Diet_Effect	ENSMUSG00000017764	Zswim1	protein_coding	ensembl_havana	164822686	164826871
2328.48	-0.0700842	0.115804	-0.605197	0.545048	0.866111	Diet_Effect	ENSMUSG00000017765	Slc12a4	protein_coding	ensembl_havana	105943590	105966097
1.5241	-2.28257	3.31172	-0.689242	0.490671		Diet_Effect	ENSMUSG00000017767	Spata25	protein_coding	ensembl_havana	164826389	164828537
6610.03	-0.162164	0.110122	-1.47259	0.140861	0.497429	Diet_Effect	ENSMUSG00000017774	Myo1c	protein_coding	ensembl_havana	75650504	75673910
3059.69	-0.277697	0.158438	-1.75272	0.0796508	0.372232	Diet_Effect	ENSMUSG00000017776	Crk	protein_coding	ensembl_havana	75679259	75706908
3205.96	-0.148541	0.137368	-1.08133	0.27955	0.677855	Diet_Effect	ENSMUSG00000017778	Cox7c	protein_coding	ensembl_havana	86044816	86046904
1024.24	-0.159819	0.186798	-0.855573	0.392234	0.773122	Diet_Effect	ENSMUSG00000017781	Pitpna	protein_coding	ensembl_havana	75588097	75628804
1892.22	0.0335368	0.122352	0.274101	0.784007	0.950927	Diet_Effect	ENSMUSG00000017801	Mlx	protein_coding	ensembl_havana	101087277	101092207
1212.45	0.196053	0.126011	1.55584	0.119747	0.460704	Diet_Effect	ENSMUSG00000017802	Retreg3	protein_coding	ensembl_havana	101096322	101119893
7.46062	-0.38348	1.19816	-0.320058	0.748924	0.941272	Diet_Effect	ENSMUSG00000017817	Jph2	protein_coding	ensembl_havana	163336242	163397993
485.57	0.154641	0.188052	0.822334	0.410887	0.785009	Diet_Effect	ENSMUSG00000017830	Dhx58	protein_coding	ensembl_havana	100694884	100704271
1223.16	-0.174802	0.191407	-0.913246	0.361113	0.751296	Diet_Effect	ENSMUSG00000017831	Rab5a	protein_coding	ensembl_havana	53479234	53507680
1868.48	-0.11373	0.119042	-0.955371	0.33939	0.729927	Diet_Effect	ENSMUSG00000017837	Nkiras2	protein_coding	ensembl_havana	100619244	100627607
4876.52	0.115295	0.0857493	1.34455	0.17877	0.557502	Diet_Effect	ENSMUSG00000017843	Ppp2r5c	protein_coding	ensembl_havana	110447120	110583062
2227.35	0.153296	0.1102	1.39107	0.164205	0.535866	Diet_Effect	ENSMUSG00000017858	Ift52	protein_coding	ensembl_havana	163017354	163046141
44.6745	0.425277	0.607659	0.699861	0.484014	0.833701	Diet_Effect	ENSMUSG00000017861	Mybl2	protein_coding	ensembl_havana	163054687	163084688
47.0061	-0.0982729	0.45901	-0.214097	0.830471	0.963587	Diet_Effect	ENSMUSG00000017868	Sgk2	protein_coding	ensembl_havana	162987330	163014127
1004.56	-1.00883	0.425456	-2.37117	0.0177321	0.155572	Diet_Effect	ENSMUSG00000017897	Eya2	protein_coding	ensembl_havana	165595032	165771727
2222.26	-0.528091	0.162746	-3.24487	0.00117505	0.023952	Diet_Effect	ENSMUSG00000017929	B4galt5	protein_coding	ensembl_havana	167298444	167349183
13.0046	1.96364	1.19307	1.64587	0.0997911	0.419739	Diet_Effect	ENSMUSG00000017943	Gdap1l1	protein_coding	ensembl_havana	163438476	163455324
8231.66	-0.279539	0.112614	-2.48228	0.0130546	0.126864	Diet_Effect	ENSMUSG00000017950	Hnf4a	protein_coding	ensembl_havana	163506808	163572910
155.607	-2.7688	0.416696	-6.64465	3.03943e-11	9.0016e-09	Diet_Effect	ENSMUSG00000017969	Ptgis	protein_coding	ensembl_havana	167191805	167240604
762.384	0.379444	0.171395	2.21386	0.0268382	0.200465	Diet_Effect	ENSMUSG00000017978	Cadps2	protein_coding	ensembl_havana	23262773	23839421
2925.69	-0.0364793	0.0982855	-0.371157	0.710521	0.930267	Diet_Effect	ENSMUSG00000017999	Ddx27	protein_coding	ensembl_havana	167015193	167034947
1009.57	-0.11287	0.162607	-0.694131	0.4876	0.835377	Diet_Effect	ENSMUSG00000018001	Cyth3	protein_coding	ensembl_havana	143622447	143710250
71.0472	-0.0801217	0.444739	-0.180154	0.857031	0.971965	Diet_Effect	ENSMUSG00000018008	Cyth4	protein_coding	ensembl_havana	78597047	78622019
357.128	-0.298867	0.203727	-1.467	0.142377	0.499825	Diet_Effect	ENSMUSG00000018012	Rac3	protein_coding	ensembl_havana	120721470	120723969
1950.42	0.0697393	0.104361	0.66825	0.503974	0.846475	Diet_Effect	ENSMUSG00000018040	Rrp7a	protein_coding	ensembl_havana	83113433	83122801
18120.2	-0.0200363	0.123228	-0.162596	0.870836	0.976282	Diet_Effect	ENSMUSG00000018042	Cyb5r3	protein_coding	ensembl_havana	83153494	83172592
894.528	0.439246	0.152794	2.87476	0.00404339	0.0590861	Diet_Effect	ENSMUSG00000018068	Ints2	protein_coding	ensembl_havana	86210681	86257575
1051.11	-0.26196	0.127956	-2.04727	0.0406315	0.258356	Diet_Effect	ENSMUSG00000018076	Med13l	protein_coding	ensembl_havana	118560679	118765438
2922.63	-0.0162181	0.137294	-0.118127	0.905967	0.985213	Diet_Effect	ENSMUSG00000018102	H2bc4	protein_coding	ensembl_havana	23684199	23692908
38.4347	0.126927	0.522419	0.24296	0.808037	0.95821	Diet_Effect	ENSMUSG00000018126	Baiap2l2	protein_coding	ensembl_havana	79258195	79285537
19850.9	0.057194	0.140837	0.4061	0.684669	0.922464	Diet_Effect	ENSMUSG00000018143	Mafk	protein_coding	ensembl_havana	139791513	139802653
2659.57	0.0358559	0.10122	0.354238	0.723161	0.935074	Diet_Effect	ENSMUSG00000018160	Med1	protein_coding	ensembl_havana	98152154	98193293
4780.97	-0.110679	0.106491	-1.03933	0.298653	0.694635	Diet_Effect	ENSMUSG00000018166	Erbb3	protein_coding	ensembl_havana	128567523	128589652
2824.81	0.0948509	0.114427	0.828922	0.407149	0.782931	Diet_Effect	ENSMUSG00000018167	Stard3	protein_coding	ensembl_havana	98358368	98381112
2.06186	0.994233	3.32205	0.299283	0.764724		Diet_Effect	ENSMUSG00000018168	Ikzf3	protein_coding	ensembl_havana	98464902	98546031
9.66904	0.804904	1.23197	0.653347	0.513533	0.851312	Diet_Effect	ENSMUSG00000018169	Mfng	protein_coding	ensembl_havana	78755882	78773475
14356.2	-0.451644	0.1468	-3.0766	0.00209378	0.0366055	Diet_Effect	ENSMUSG00000018171	Vmp1	protein_coding	ensembl_havana	86583865	86683836
1984.5	0.118337	0.124179	0.952954	0.340613	0.731695	Diet_Effect	ENSMUSG00000018189	Uchl5	protein_coding	ensembl_havana	143777272	143807466
1383.11	0.132373	0.135719	0.975344	0.32939	0.722263	Diet_Effect	ENSMUSG00000018196	Glrx2	protein_coding	ensembl_havana	143716338	143749676
1591.04	0.117329	0.108833	1.07806	0.281005	0.678381	Diet_Effect	ENSMUSG00000018199	Ro60	protein_coding	ensembl_havana	143750790	143777068
1642.65	-0.0560359	0.118357	-0.47345	0.635892	0.905722	Diet_Effect	ENSMUSG00000018209	Stk4	protein_coding	ensembl_havana	164070322	164155524
1258.05	0.0472998	0.149773	0.315811	0.752146	0.942435	Diet_Effect	ENSMUSG00000018211	Wfdc15b	protein_coding	ensembl_havana	164214454	164221660
397.193	-0.597675	0.203612	-2.93536	0.00333165	0.0510616	Diet_Effect	ENSMUSG00000018217	Pmp22	protein_coding	ensembl_havana	63128982	63159547
16.5074	0.673108	0.822471	0.818398	0.41313	0.786278	Diet_Effect	ENSMUSG00000018238	Gdf9	protein_coding	ensembl_havana	53431023	53437904
1086.38	-0.0904317	0.147203	-0.614335	0.538994	0.862841	Diet_Effect	ENSMUSG00000018239	Zcchc10	protein_coding	ensembl_havana	53324679	53333301
10560.2	-0.0641984	0.10444	-0.614694	0.538757	0.86284	Diet_Effect	ENSMUSG00000018286	Psmb6	protein_coding	ensembl_havana	70525367	70527858
5028.61	0.00315331	0.0924178	0.0341201	0.972781	0.996744	Diet_Effect	ENSMUSG00000018287	Spag7	protein_coding	ensembl_havana	70663771	70669416
24279.7	0.00343014	0.0857655	0.0399944	0.968098	0.99494	Diet_Effect	ENSMUSG00000018293	Pfn1	protein_coding	ensembl_havana	70651850	70654644
3229.91	0.092712	0.0983523	0.942652	0.345859	0.7376	Diet_Effect	ENSMUSG00000018322	Tomm34	protein_coding	ensembl_havana	164053540	164071169
12922	0.127404	0.0841197	1.51456	0.129885	0.47853	Diet_Effect	ENSMUSG00000018326	Ywhab	protein_coding	ensembl_havana	163994960	164018588
147.793	-0.819048	0.32092	-2.55219	0.010705	0.112143	Diet_Effect	ENSMUSG00000018334	Ksr1	protein_coding	ensembl_havana	79013440	79146407
1515.83	-1.04961	0.121643	-8.62857	6.21249e-18	5.20352e-15	Diet_Effect	ENSMUSG00000018339	Gpx3	protein_coding	ensembl_havana	54902453	54910377
13366.8	0.0615569	0.0995778	0.618179	0.536457	0.862185	Diet_Effect	ENSMUSG00000018340	Anxa6	protein_coding	ensembl_havana	54979108	55033445
3.37459	-1.52962	1.62026	-0.944055	0.345142		Diet_Effect	ENSMUSG00000018341	Il12rb2	protein_coding	ensembl_havana	67291318	67376188
947.451	0.074564	0.142237	0.524223	0.600124	0.891885	Diet_Effect	ENSMUSG00000018347	Zkscan6	protein_coding	ensembl_havana	65807175	65829239
2122.45	-0.463482	0.111733	-4.14814	3.35193e-05	0.00151387	Diet_Effect	ENSMUSG00000018362	Kpna2	protein_coding	ensembl_havana	106988629	106999541
2390.45	-0.307709	0.137643	-2.23556	0.0253805	0.194047	Diet_Effect	ENSMUSG00000018363	Smurf2	protein_coding	ensembl_havana	106820066	106920715
559.166	0.171131	0.170526	1.00355	0.315595	0.708825	Diet_Effect	ENSMUSG00000018372	Cep95	protein_coding	ensembl_havana	106789252	106819930
5323.19	0.0144709	0.0929269	0.155723	0.876251	0.977248	Diet_Effect	ENSMUSG00000018377	Vezf1	protein_coding	ensembl_havana	88068279	88084729
751.117	0.15957	0.13615	1.17201	0.241193	0.637795	Diet_Effect	ENSMUSG00000018378	Cuedc1	protein_coding	ensembl_havana	88098058	88194140
1975.37	-0.162709	0.167826	-0.969507	0.332292	0.724119	Diet_Effect	ENSMUSG00000018379	Srsf1	protein_coding	ensembl_havana	88047373	88053755
10.4408	-1.11302	0.973657	-1.14313	0.252983	0.648927	Diet_Effect	ENSMUSG00000018381	Abi3	protein_coding	ensembl_havana	95830074	95842476
4062.9	0.0429762	0.123473	0.348062	0.727794	0.936788	Diet_Effect	ENSMUSG00000018387	Shroom1	protein_coding	ensembl_havana	53457205	53467766
3342.81	0.224419	0.097366	2.3049	0.0211724	0.172554	Diet_Effect	ENSMUSG00000018395	Kif3a	protein_coding	ensembl_havana	53567379	53601967
2466.74	-0.112993	0.117285	-0.963404	0.335345	0.726613	Diet_Effect	ENSMUSG00000018398	Septin8	protein_coding	ensembl_havana	53519257	53549565
1942.12	0.0107475	0.15531	0.0692003	0.94483	0.990816	Diet_Effect	ENSMUSG00000018401	Mtmr4	protein_coding	ensembl_havana	87592162	87616302
496.556	0.491952	0.178128	2.76179	0.00574852	0.0740616	Diet_Effect	ENSMUSG00000018405	Mrm1	protein_coding	ensembl_havana	84813061	84819515
230.804	-0.159384	0.245341	-0.649645	0.515922	0.852677	Diet_Effect	ENSMUSG00000018411	Mapt	protein_coding	ensembl_havana	104231390	104332090
3600.19	0.0496488	0.0975777	0.508813	0.610883	0.897596	Diet_Effect	ENSMUSG00000018412	Kansl1	protein_coding	ensembl_havana	104333229	104468861
2015.41	0.0233437	0.11621	0.200875	0.840796	0.967373	Diet_Effect	ENSMUSG00000018415	Gid4	protein_coding	ensembl_havana	60417145	60450927
3453.31	0.0379268	0.117985	0.321455	0.747866	0.941225	Diet_Effect	ENSMUSG00000018417	Myo1b	protein_coding	ensembl_havana	51749765	51916071
3394.14	0.0218924	0.129517	0.169031	0.865772	0.974394	Diet_Effect	ENSMUSG00000018425	Dhx40	protein_coding	ensembl_havana	86768846	86807746
6689.5	0.495757	0.110045	4.50506	6.63535e-06	0.000406211	Diet_Effect	ENSMUSG00000018427	Ypel2	protein_coding	ensembl_havana	86936425	86993707
2075.47	0.209575	0.138037	1.51826	0.128949	0.477041	Diet_Effect	ENSMUSG00000018428	Akap1	protein_coding	ensembl_havana	88830792	88864586
2006.06	-0.0668766	0.102744	-0.650902	0.51511	0.851905	Diet_Effect	ENSMUSG00000018433	Nol11	protein_coding	ensembl_havana	107166663	107189381
2288.16	-0.00833562	0.0991613	-0.0840613	0.933008	0.9891	Diet_Effect	ENSMUSG00000018442	Derl2	protein_coding	ensembl_havana	71007164	71019841
3964.73	-0.0433642	0.0944366	-0.459188	0.646099	0.910256	Diet_Effect	ENSMUSG00000018446	C1qbp	protein_coding	ensembl_havana	70977836	70983026
1413.36	-0.0332472	0.117689	-0.282499	0.777561	0.949496	Diet_Effect	ENSMUSG00000018449	Rpain	protein_coding	ensembl_havana	70970213	70977833
5.88785	-1.52632	1.81356	-0.84162	0.400001		Diet_Effect	ENSMUSG00000018451	6330403K07Rik	protein_coding	ensembl_havana	71031941	71033513
4.55686	-0.807318	2.25816	-0.357512	0.720709		Diet_Effect	ENSMUSG00000018459	Slc13a3	protein_coding	ensembl_havana	165405028	165473230
9.15008	-2.37308	1.37569	-1.72501	0.0845249	0.384603	Diet_Effect	ENSMUSG00000018470	Kcnab3	protein_coding	ensembl_havana	69326258	69333042
1656.19	-0.165745	0.135482	-1.22338	0.221187	0.614569	Diet_Effect	ENSMUSG00000018474	Chd3	protein_coding	ensembl_havana	69343273	69369406
7268.25	-0.560903	0.13182	-4.25508	2.08977e-05	0.00103517	Diet_Effect	ENSMUSG00000018476	Kdm6b	protein_coding	ensembl_havana	69398508	69413675
2.1075	-0.727642	2.38885	-0.304599	0.760672		Diet_Effect	ENSMUSG00000018479	1700125H20Rik	protein_coding	ensembl_havana	85170404	85181145
4406.69	-0.0813802	0.172619	-0.471443	0.637325	0.906386	Diet_Effect	ENSMUSG00000018481	Appbp2	protein_coding	ensembl_havana	85187262	85235130
6.90501	2.20265	1.74439	1.26271	0.206695	0.595678	Diet_Effect	ENSMUSG00000018486	Wnt9b	protein_coding	ensembl_havana	103727364	103749821
46.6182	-1.30441	0.586722	-2.22322	0.0262008	0.197627	Diet_Effect	ENSMUSG00000018500	Adora2b	protein_coding	ensembl_havana	62248984	62266453
4271.85	-0.0748135	0.123785	-0.604384	0.545588	0.866238	Diet_Effect	ENSMUSG00000018501	Ncor1	protein_coding	ensembl_havana	62316426	62458541
17.6699	-1.46587	0.993623	-1.47528	0.140137	0.496398	Diet_Effect	ENSMUSG00000018507	Trpv2	protein_coding	ensembl_havana	62574486	62600515
91.6366	-0.0969958	0.37007	-0.262101	0.793243	0.954716	Diet_Effect	ENSMUSG00000018509	Cenpv	protein_coding	ensembl_havana	62524946	62539261
535.761	0.0697675	0.172446	0.404576	0.685789	0.922912	Diet_Effect	ENSMUSG00000018537	Pcgf2	protein_coding	ensembl_havana	97688823	97700497
1402.72	-0.018614	0.119383	-0.155918	0.876097	0.977196	Diet_Effect	ENSMUSG00000018541	Cwc25	protein_coding	ensembl_havana	97745481	97766556
7.10588	-0.422332	1.17622	-0.359058	0.719552	0.93321	Diet_Effect	ENSMUSG00000018543	1700001P01Rik	protein_coding	ensembl_havana	97771481	97775918
65.957	0.180351	0.399987	0.450893	0.652067	0.912041	Diet_Effect	ENSMUSG00000018547	Pip4k2b	protein_coding	ensembl_havana	97715157	97744704
1316.9	0.333471	0.15655	2.13013	0.0331612	0.230017	Diet_Effect	ENSMUSG00000018548	Trim37	protein_coding	ensembl_havana	87127077	87220683
17.4057	0.0320253	0.806918	0.0396884	0.968342	0.994961	Diet_Effect	ENSMUSG00000018554	Ybx2	protein_coding	ensembl_havana	69935796	69941605
480.92	-0.0742773	0.230431	-0.322341	0.747194	0.940901	Diet_Effect	ENSMUSG00000018559	Ctdnep1	protein_coding	ensembl_havana	69981156	69990601
3560.71	0.0509179	0.103929	0.489929	0.624184	0.901522	Diet_Effect	ENSMUSG00000018565	Elp5	protein_coding	ensembl_havana	69968222	69982517
30.546	-0.711414	0.760599	-0.935334	0.349616	0.740843	Diet_Effect	ENSMUSG00000018566	Slc2a4	protein_coding	ensembl_havana	69942539	69948188
14814.1	-0.00921315	0.089891	-0.102492	0.918366	0.987168	Diet_Effect	ENSMUSG00000018567	Gabarap	protein_coding	ensembl_havana	69991143	69994951
22624.9	-0.080475	0.0881811	-0.91261	0.361448	0.751524	Diet_Effect	ENSMUSG00000018569	Cldn7	protein_coding	ensembl_havana	69964779	69967885
289.164	0.516284	0.241206	2.14043	0.0323199	0.226508	Diet_Effect	ENSMUSG00000018570	2810408A11Rik	protein_coding	ensembl_havana	69897352	69900987
2168.86	0.0994822	0.133618	0.744528	0.456557	0.816529	Diet_Effect	ENSMUSG00000018572	Phf23	protein_coding	ensembl_havana	69995777	70000009
4615.48	0.153954	0.111771	1.37741	0.168387	0.542459	Diet_Effect	ENSMUSG00000018574	Acadvl	protein_coding	ensembl_havana	70010183	70015411
27.7765	0.680211	0.930867	0.730729	0.464945	0.821905	Diet_Effect	ENSMUSG00000018581	Dnah11	protein_coding	ensembl_havana	117877982	118199043
15945.4	-0.164158	0.0819054	-2.00424	0.0450443	0.273428	Diet_Effect	ENSMUSG00000018583	G3bp1	protein_coding	ensembl_havana	55469685	55504838
4027.25	-0.0527622	0.121413	-0.434569	0.663875	0.915548	Diet_Effect	ENSMUSG00000018585	Atox1	protein_coding	ensembl_havana	55446641	55461239
15124.4	0.18103	0.11919	1.51884	0.128804	0.476695	Diet_Effect	ENSMUSG00000018593	Sparc	protein_coding	ensembl_havana	55394500	55423183
3.73086	-0.468591	1.98829	-0.235675	0.813685		Diet_Effect	ENSMUSG00000018595	Glra4	protein_coding	ensembl_havana	136757674	136780141
446.975	-0.14554	0.173169	-0.840446	0.400658	0.779036	Diet_Effect	ENSMUSG00000018599	Mief2	protein_coding	ensembl_havana	60728398	60732951
56.0398	-2.34079	0.462181	-5.06466	4.09125e-07	3.75072e-05	Diet_Effect	ENSMUSG00000018604	Tbx3	protein_coding	ensembl_havana	119670669	119684724
10.9877	-1.56703	1.05641	-1.48336	0.13798	0.492075	Diet_Effect	ENSMUSG00000018620	Mmp20	protein_coding	ensembl_havana	7628231	7674979
9486.75	-1.435	0.174619	-8.2179	2.071e-16	1.31594e-13	Diet_Effect	ENSMUSG00000018623	Mmp7	protein_coding	ensembl_havana	7692090	7699585
936.365	-0.265518	0.20971	-1.26612	0.20547	0.59477	Diet_Effect	ENSMUSG00000018648	Dusp14	protein_coding	ensembl_havana	84048041	84069261
641.96	0.189569	0.136476	1.38903	0.164825	0.536711	Diet_Effect	ENSMUSG00000018651	Tada2a	protein_coding	ensembl_havana	84078920	84129600
16.4039	-3.2197	1.26016	-2.555	0.0106187	0.111557	Diet_Effect	ENSMUSG00000018654	Ikzf1	protein_coding	ensembl_havana	11685003	11772926
2.62334	-1.23427	3.31831	-0.371958	0.709924		Diet_Effect	ENSMUSG00000018656	Tcaf3	protein_coding	ensembl_havana	42584866	42597692
2172.01	-0.100507	0.127813	-0.786362	0.431656	0.800535	Diet_Effect	ENSMUSG00000018659	Pnpo	protein_coding	ensembl_havana	96937825	96943986
2218.51	0.062406	0.124445	0.501475	0.616037	0.898987	Diet_Effect	ENSMUSG00000018661	Cog1	protein_coding	ensembl_havana	113649169	113667054
2204.23	-0.0461901	0.107847	-0.428292	0.668439	0.917149	Diet_Effect	ENSMUSG00000018666	Cbx1	protein_coding	ensembl_havana	96789127	96808640
3328.42	0.124305	0.0980602	1.26764	0.204928	0.593929	Diet_Effect	ENSMUSG00000018669	Cdk5rap3	protein_coding	ensembl_havana	96907426	96916496
791.362	-0.0675888	0.238862	-0.282962	0.777206	0.949496	Diet_Effect	ENSMUSG00000018672	Copz2	protein_coding	ensembl_havana	96849870	96861203
12348.5	-0.00988211	0.0809705	-0.122046	0.902863	0.984424	Diet_Effect	ENSMUSG00000018677	Slc25a39	protein_coding	ensembl_havana	102402985	102407946
1291.43	-0.169963	0.124759	-1.36233	0.173092	0.548866	Diet_Effect	ENSMUSG00000018678	Sp2	protein_coding	ensembl_havana	96953341	96982959
1504.14	0.0536736	0.119654	0.448573	0.65374	0.912472	Diet_Effect	ENSMUSG00000018697	Aatf	protein_coding	ensembl_havana	84422855	84513522
4034.01	-0.00268782	0.10462	-0.0256912	0.979504	0.997798	Diet_Effect	ENSMUSG00000018707	Dync1h1	protein_coding	ensembl_havana	110601452	110666945
42.8077	0.876638	0.586035	1.49588	0.134685	0.486826	Diet_Effect	ENSMUSG00000018727	Cpsf4l	protein_coding	ensembl_havana	113698172	113710017
556.729	0.0759275	0.15938	0.476391	0.633795	0.904885	Diet_Effect	ENSMUSG00000018733	Pex12	protein_coding	ensembl_havana	83294642	83302586
7147.67	-0.186578	0.111831	-1.66839	0.0952382	0.407619	Diet_Effect	ENSMUSG00000018736	Ndel1	protein_coding	ensembl_havana	68821434	68871858
90.3235	-0.248409	0.390846	-0.635568	0.525058	0.856777	Diet_Effect	ENSMUSG00000018740	Slc25a35	protein_coding	ensembl_havana	68968131	68974365
1576.82	-0.054031	0.143889	-0.375503	0.707286	0.929026	Diet_Effect	ENSMUSG00000018750	Zbtb4	protein_coding	ensembl_havana	69765912	69784023
3.13275	1.32282	1.69133	0.782117	0.434146		Diet_Effect	ENSMUSG00000018752	Tnfsfm13	protein_coding	ensembl_havana	69682577	69696098
2771.89	0.240056	0.108154	2.21958	0.0264472	0.198591	Diet_Effect	ENSMUSG00000018761	Mpdu1	protein_coding	ensembl_havana	69656697	69662642
919.759	-0.209964	0.175656	-1.19532	0.231963	0.626101	Diet_Effect	ENSMUSG00000018765	Fxr2	protein_coding	ensembl_havana	69632990	69653297
4560.58	-0.011127	0.108117	-0.102916	0.918029	0.987168	Diet_Effect	ENSMUSG00000018770	Atp5g3	protein_coding	ensembl_havana	73908447	73911326
651.906	-1.15909	0.280278	-4.13549	3.54193e-05	0.00157419	Diet_Effect	ENSMUSG00000018774	Cd68	protein_coding	ensembl_havana	69664213	69666153
1.69628	-1.80648	2.42465	-0.745047	0.456243		Diet_Effect	ENSMUSG00000018776	Slc35g3	protein_coding	ensembl_havana	69759890	69761968
3152.99	-0.0588184	0.12706	-0.462917	0.643424	0.908614	Diet_Effect	ENSMUSG00000018796	Acsl1	protein_coding	ensembl_havana	46471037	46536051
710.987	-0.293918	0.139993	-2.09953	0.0357706	0.239609	Diet_Effect	ENSMUSG00000018800	Abca5	protein_coding	ensembl_havana	110269369	110337716
736.499	0.179157	0.1565	1.14477	0.252302	0.648112	Diet_Effect	ENSMUSG00000018809	Smyd4	protein_coding	ensembl_havana	75348433	75405705
108.618	-2.0564	0.361786	-5.68404	1.31552e-08	1.73151e-06	Diet_Effect	ENSMUSG00000018819	Lsp1	protein_coding	ensembl_havana	142460809	142494867
2644.37	0.107549	0.100186	1.0735	0.283047	0.679926	Diet_Effect	ENSMUSG00000018820	Zfyve27	protein_coding	ensembl_havana	42163951	42194590
2799.74	-0.250283	0.135578	-1.84604	0.064886	0.332804	Diet_Effect	ENSMUSG00000018821	Avpi1	protein_coding	ensembl_havana	42123273	42129059
1242.67	-0.963823	0.16823	-5.72919	1.00912e-08	1.39813e-06	Diet_Effect	ENSMUSG00000018822	Sfrp5	protein_coding	ensembl_havana	42197971	42202252
96.4863	-0.675937	0.455075	-1.48533	0.137456	0.491731	Diet_Effect	ENSMUSG00000018830	Myh11	protein_coding	ensembl_havana	14194535	14291372
1290.66	0.283316	0.146678	1.93155	0.0534156	0.29954	Diet_Effect	ENSMUSG00000018841	Rad51d	protein_coding	ensembl_havana	82876434	82890614
6.51616	-2.03801	1.24258	-1.64014	0.100976		Diet_Effect	ENSMUSG00000018844	Fndc8	protein_coding	ensembl_havana	82892124	82900801
1492.43	-0.127793	0.107568	-1.18802	0.234824	0.62958	Diet_Effect	ENSMUSG00000018846	Pank3	protein_coding	ensembl_havana	35769484	35791285
3547.55	-0.0387743	0.0933828	-0.415218	0.677982	0.919796	Diet_Effect	ENSMUSG00000018848	Rars	protein_coding	ensembl_havana	35808381	35834506
8338.66	-0.0614543	0.127388	-0.48242	0.629508	0.903493	Diet_Effect	ENSMUSG00000018849	Wwc1	protein_coding	ensembl_havana	35838400	35980527
1735.23	-0.0314253	0.103017	-0.305051	0.760327	0.944043	Diet_Effect	ENSMUSG00000018858	Mrpl58	protein_coding	ensembl_havana	115403752	115412674
710.091	0.340667	0.141327	2.4105	0.0159308	0.144865	Diet_Effect	ENSMUSG00000018861	Fdxr	protein_coding	ensembl_havana	115268024	115277050
8.24549	-1.44331	1.16783	-1.23589	0.216499	0.607867	Diet_Effect	ENSMUSG00000018862	Otop3	protein_coding	ensembl_havana	115334731	115346927
435.836	-0.323888	0.16736	-1.93528	0.0529556	0.298505	Diet_Effect	ENSMUSG00000018865	Sult4a1	protein_coding	ensembl_havana	84076097	84105754
2445.81	-0.0174532	0.109886	-0.158829	0.873803	0.976886	Diet_Effect	ENSMUSG00000018882	Mrpl45	protein_coding	ensembl_havana	97315716	97329920
5.05984	-0.702505	1.66688	-0.42145	0.673427		Diet_Effect	ENSMUSG00000018893	Mb	protein_coding	ensembl_havana	77015487	77050670
26438.4	0.340614	0.085035	4.00557	6.18679e-05	0.00244644	Diet_Effect	ENSMUSG00000018899	Irf1	protein_coding	ensembl_havana	53770014	53778374
2143.65	0.367976	0.139475	2.63829	0.00833258	0.094199	Diet_Effect	ENSMUSG00000018900	Slc22a5	protein_coding	ensembl_havana	53864542	53891660
2785.1	-0.21366	0.137093	-1.55851	0.119113	0.459423	Diet_Effect	ENSMUSG00000018906	P4ha2	protein_coding	ensembl_havana	54100095	54131665
141.342	0.237081	0.314615	0.753559	0.451114	0.812653	Diet_Effect	ENSMUSG00000018907	Alox12e	protein_coding	ensembl_havana	70315610	70322628
2598.62	-0.0768156	0.110343	-0.696153	0.486333	0.834808	Diet_Effect	ENSMUSG00000018909	Arrb1	protein_coding	ensembl_havana	99535466	99606771
12.0943	-3.70513	1.16182	-3.18909	0.00142723	0.0279783	Diet_Effect	ENSMUSG00000018916	Csf2	protein_coding	ensembl_havana	54247271	54249667
579.327	-1.74246	0.320514	-5.43647	5.43471e-08	6.41958e-06	Diet_Effect	ENSMUSG00000018919	Tm4sf5	protein_coding	ensembl_havana	70505244	70511178
37627.6	-0.507951	0.127221	-3.99267	6.5334e-05	0.00255607	Diet_Effect	ENSMUSG00000018920	Cxcl16	protein_coding	ensembl_havana	70453983	70459984
1284.41	0.16094	0.145898	1.1031	0.269983	0.667134	Diet_Effect	ENSMUSG00000018921	Pelp1	protein_coding	ensembl_havana	70392883	70410031
1876.68	0.0456921	0.104141	0.43875	0.660843	0.914529	Diet_Effect	ENSMUSG00000018923	Med11	protein_coding	ensembl_havana	70451919	70453727
30.3207	-0.133774	0.716387	-0.186735	0.851869	0.970342	Diet_Effect	ENSMUSG00000018924	Alox15	protein_coding	ensembl_havana	70344152	70352031
3.1019	2.5751	1.96225	1.31232	0.189413		Diet_Effect	ENSMUSG00000018925	Heatr9	protein_coding	ensembl_havana	83511736	83522175
3.78655	1.03463	2.21668	0.466747	0.640681		Diet_Effect	ENSMUSG00000018927	Ccl6	protein_coding	ensembl_havana	83587882	83593087
6.17345	1.37702	2.25794	0.609858	0.541956		Diet_Effect	ENSMUSG00000018930	Ccl4	protein_coding	ensembl_havana	83662584	83664683
1211.23	0.148632	0.135818	1.09434	0.273804	0.672853	Diet_Effect	ENSMUSG00000018931	Natd1	protein_coding	ensembl_havana	60902246	60914750
7425.64	-0.638249	0.0999852	-6.38344	1.73157e-10	3.79852e-08	Diet_Effect	ENSMUSG00000018932	Map2k3	protein_coding	ensembl_havana	60932033	60952811
11441.1	-0.0567729	0.105988	-0.535654	0.592198	0.887229	Diet_Effect	ENSMUSG00000018965	Ywhah	protein_coding	ensembl_havana	33018816	33027966
1838.54	-0.178434	0.203867	-0.875246	0.38144	0.764083	Diet_Effect	ENSMUSG00000018974	Sart3	protein_coding	ensembl_havana	113742446	113772510
35.7184	0.527122	0.495581	1.06365	0.287489	0.683859	Diet_Effect	ENSMUSG00000018983	E2f2	protein_coding	ensembl_havana	136172394	136196057
649.295	-0.0466022	0.196849	-0.236741	0.812858	0.959855	Diet_Effect	ENSMUSG00000018995	Nars2	protein_coding	ensembl_havana	96951505	97064758
1205.88	0.228839	0.115203	1.9864	0.0469886	0.280576	Diet_Effect	ENSMUSG00000018999	Slc35b4	protein_coding	ensembl_havana	34153380	34177111
32.3226	-0.320969	0.572027	-0.561108	0.574724	0.880189	Diet_Effect	ENSMUSG00000019027	Dnah1	protein_coding	ensembl_havana	31260375	31323896
4167.03	0.113682	0.0989417	1.14898	0.250564	0.647593	Diet_Effect	ENSMUSG00000019039	Dalrd3	protein_coding	ensembl_havana	108569886	108572774
7944.15	0.24186	0.0940644	2.57121	0.0101343	0.107634	Diet_Effect	ENSMUSG00000019054	Fis1	protein_coding	ensembl_havana	136953275	136966234
1292.18	-0.23651	0.141714	-1.66893	0.095132	0.40739	Diet_Effect	ENSMUSG00000019055	Plod1	protein_coding	ensembl_havana	147909753	147936767
4214.42	0.0193353	0.0890698	0.21708	0.828146	0.9635	Diet_Effect	ENSMUSG00000019066	Rab3d	protein_coding	ensembl_havana	21907491	21918192
321.527	0.00804878	0.19525	0.0412229	0.967118	0.994674	Diet_Effect	ENSMUSG00000019080	Mfsd3	protein_coding	ensembl_havana	76701465	76704239
888.698	0.103566	0.153395	0.675157	0.499576	0.843475	Diet_Effect	ENSMUSG00000019082	Slc25a22	protein_coding	ensembl_havana	141429744	141437892
8848.64	-0.00365399	0.0851455	-0.0429147	0.96577	0.994448	Diet_Effect	ENSMUSG00000019087	Atp6ap1	protein_coding	ensembl_havana	74297097	74304721
1393.82	-0.00239943	0.131001	-0.018316	0.985387	0.998573	Diet_Effect	ENSMUSG00000019088	Dnase1l1	protein_coding	ensembl_havana	74273217	74282337
17.3937	-2.08802	1.30383	-1.60145	0.109278	0.437373	Diet_Effect	ENSMUSG00000019102	Aldh3a1	protein_coding	ensembl_havana	61207537	61218421
36.4727	1.73042	0.817773	2.11602	0.0343435	0.234041	Diet_Effect	ENSMUSG00000019122	Ccl9	protein_coding	ensembl_havana	83572919	83578636
11.8345	-1.37477	1.58071	-0.869716	0.384455	0.766464	Diet_Effect	ENSMUSG00000019124	Scrn1	protein_coding	ensembl_havana	54501173	54566489
2990.09	-0.137182	0.167728	-0.817887	0.413422	0.786407	Diet_Effect	ENSMUSG00000019132	BC005537	protein_coding	ensembl_havana	24801657	24816197
3913.62	-0.0692997	0.0915413	-0.757032	0.449031	0.812092	Diet_Effect	ENSMUSG00000019139	Isyna1	protein_coding	ensembl_havana	70594373	70597290
1903.58	0.252837	0.121423	2.08229	0.0373164	0.245144	Diet_Effect	ENSMUSG00000019143	Hars2	protein_coding	ensembl_havana	36783008	36792562
1093.78	-0.248963	0.250126	-0.995351	0.319566	0.712269	Diet_Effect	ENSMUSG00000019158	Tmem160	protein_coding	ensembl_havana	16452779	16455494
551.494	0.0773014	0.156427	0.49417	0.621186	0.900795	Diet_Effect	ENSMUSG00000019173	Rab5c	protein_coding	ensembl_havana	100715009	100738215
25.6372	0.765151	0.648332	1.18018	0.237927	0.633933	Diet_Effect	ENSMUSG00000019178	Styxl1	protein_coding	ensembl_havana	135747220	135778385
14516.1	-0.0652638	0.0912397	-0.715301	0.474423	0.828017	Diet_Effect	ENSMUSG00000019179	Mdh2	protein_coding	ensembl_havana	135778480	135790398
8835.71	-0.139558	0.0808772	-1.72555	0.0844279	0.384326	Diet_Effect	ENSMUSG00000019188	H13	protein_coding	ensembl_havana	152669461	152708670
350.256	-1.16434	0.263272	-4.42259	9.75244e-06	0.000551252	Diet_Effect	ENSMUSG00000019189	Rnf145	protein_coding	ensembl_havana	44518964	44565520
227.615	-0.356287	0.263791	-1.35064	0.176811	0.554272	Diet_Effect	ENSMUSG00000019194	Scn1b	protein_coding	ensembl_havana	31116524	31127003
6906.22	-0.0355023	0.0921896	-0.385101	0.700163	0.926646	Diet_Effect	ENSMUSG00000019210	Atp6v1e1	protein_coding	ensembl_havana	120794305	120822793
139.103	0.445411	0.300673	1.48138	0.138505	0.49328	Diet_Effect	ENSMUSG00000019214	Chtf18	protein_coding	ensembl_havana	25718926	25727419
38.0164	-0.873684	0.656944	-1.32992	0.183544	0.56473	Diet_Effect	ENSMUSG00000019232	Etnppl	protein_coding	ensembl_havana	130617448	130637521
52.2854	0.258565	0.451901	0.572172	0.567206	0.876169	Diet_Effect	ENSMUSG00000019235	Rps6kl1	protein_coding	ensembl_havana	85135249	85151264
663.945	-0.257964	0.176975	-1.45763	0.144943	0.502608	Diet_Effect	ENSMUSG00000019254	Ppp1r12c	protein_coding	ensembl_havana	4481520	4501680
3520.85	-0.975746	0.143375	-6.80554	1.00668e-11	3.25439e-09	Diet_Effect	ENSMUSG00000019256	Ahr	protein_coding	ensembl_havana	35497974	35535038
1911.23	-0.000240148	0.142294	-0.00168769	0.998653	0.999684	Diet_Effect	ENSMUSG00000019261	Map1s	protein_coding	ensembl_havana	70905932	70917529
192.793	-3.63784	1.04348	-3.48627	0.000489812	0.0125707	Diet_Effect	ENSMUSG00000019278	Dpep1	protein_coding	ensembl_havana	123186242	123201812
1987.7	-0.0691691	0.116744	-0.592485	0.553526	0.87007	Diet_Effect	ENSMUSG00000019295	Tmem129	protein_coding	ensembl_havana	33653216	33658416
1450.1	-0.110733	0.112973	-0.980176	0.326999	0.719353	Diet_Effect	ENSMUSG00000019297	Nop9	protein_coding	ensembl_havana	55745693	55755500
17.6329	0.0455554	0.722929	0.063015	0.949755	0.992024	Diet_Effect	ENSMUSG00000019301	Hsd17b1	protein_coding	ensembl_havana	101078411	101080527
1818.43	-0.0170987	0.125905	-0.135806	0.891974	0.981307	Diet_Effect	ENSMUSG00000019302	Atp6v0a1	protein_coding	ensembl_havana	101009452	101063719
426.22	0.266067	0.189529	1.40383	0.16037	0.528373	Diet_Effect	ENSMUSG00000019303	Psmc3ip	protein_coding	ensembl_havana	101091823	101095436
11020.3	0.0850749	0.0976728	0.87102	0.383743	0.765866	Diet_Effect	ENSMUSG00000019312	Grb7	protein_coding	ensembl_havana	98446394	98455373
50.0385	0.154413	0.552807	0.279326	0.779995	0.949655	Diet_Effect	ENSMUSG00000019320	Noxo1	protein_coding	ensembl_havana	24696234	24700529
6.95185	2.06616	1.25599	1.64504	0.0999617	0.419879	Diet_Effect	ENSMUSG00000019326	Aoc3	protein_coding	ensembl_havana	101330605	101341938
1287.05	-0.0487765	0.169992	-0.286935	0.774162	0.94843	Diet_Effect	ENSMUSG00000019338	Zfp687	protein_coding	ensembl_havana	95006590	95015448
1.78665	0.471564	3.36284	0.140228	0.88848		Diet_Effect	ENSMUSG00000019359	Gdpd2	protein_coding	ensembl_havana	100729873	100738895
6013.43	-0.047536	0.100287	-0.474	0.6355	0.905513	Diet_Effect	ENSMUSG00000019362	D8Ertd738e	protein_coding	ensembl_havana	84246238	84249719
1766.94	-0.144086	0.135098	-1.06653	0.286184	0.682287	Diet_Effect	ENSMUSG00000019368	Sec14l4	protein_coding	ensembl_havana	4031462	4048024
1808.81	0.00877716	0.106138	0.0826955	0.934094	0.98928	Diet_Effect	ENSMUSG00000019370	Calm3	protein_coding	ensembl_havana	16915379	16924114
1741.43	0.0489085	0.120197	0.406901	0.68408	0.922165	Diet_Effect	ENSMUSG00000019373	Cops3	protein_coding	ensembl_havana	59817795	59839838
5947.95	0.133666	0.0896656	1.49072	0.136036	0.489404	Diet_Effect	ENSMUSG00000019428	Fkbp8	protein_coding	ensembl_havana	70527724	70535328
7209.12	0.0810551	0.0906317	0.894335	0.371143	0.756532	Diet_Effect	ENSMUSG00000019432	Ddx39b	protein_coding	ensembl_havana	35241746	35253707
2480.98	0.272066	0.111376	2.44278	0.0145748	0.136354	Diet_Effect	ENSMUSG00000019433	Gipc1	protein_coding	ensembl_havana	83652677	83664694
951.465	-0.277659	0.144832	-1.91712	0.0552227	0.304223	Diet_Effect	ENSMUSG00000019437	Tlcd1	protein_coding	ensembl_havana	78176711	78181909
4389.2	0.254508	0.115332	2.20675	0.0273315	0.202427	Diet_Effect	ENSMUSG00000019461	Plscr3	protein_coding	ensembl_havana	69846376	69852058
3.01962	-1.28551	1.79598	-0.715769	0.474134		Diet_Effect	ENSMUSG00000019464	Ptger1	protein_coding	ensembl_havana	83666678	83672753
445.33	-0.238601	0.186607	-1.27863	0.201028	0.588145	Diet_Effect	ENSMUSG00000019467	Arhgef25	protein_coding	ensembl_havana	127182525	127190083
3917.44	0.0753997	0.104665	0.720389	0.471286	0.82577	Diet_Effect	ENSMUSG00000019470	Xab2	protein_coding	ensembl_havana	3608421	3621316
9941.64	0.0560968	0.0965535	0.580992	0.561246	0.873708	Diet_Effect	ENSMUSG00000019471	Cdc37	protein_coding	ensembl_havana	21133222	21149982
1008.5	-0.313282	0.126153	-2.48335	0.0130155	0.126696	Diet_Effect	ENSMUSG00000019478	Rab4a	protein_coding	ensembl_havana	123805985	123835287
6491.16	-0.164022	0.105647	-1.55254	0.120533	0.461698	Diet_Effect	ENSMUSG00000019487	Trip10	protein_coding	ensembl_havana	57249455	57263665
8231.07	-0.0175259	0.0970067	-0.180666	0.856629	0.971828	Diet_Effect	ENSMUSG00000019494	Cops6	protein_coding	ensembl_havana	138161071	138164646
103986	-0.0642823	0.132698	-0.484425	0.628084	0.90311	Diet_Effect	ENSMUSG00000019505	Ubb	protein_coding	ensembl_havana	62551171	62553213
474.299	0.177849	0.193056	0.921228	0.356931	0.747204	Diet_Effect	ENSMUSG00000019518	Ap4m1	protein_coding	ensembl_havana	138172002	138180429
1498.75	0.266558	0.109345	2.43778	0.0147779	0.137741	Diet_Effect	ENSMUSG00000019528	Gyg	protein_coding	ensembl_havana	20122084	20155317
201.122	-1.48423	0.314969	-4.71231	2.44924e-06	0.000170397	Diet_Effect	ENSMUSG00000019539	Rcn3	protein_coding	ensembl_havana	45082913	45092221
1310.71	-0.475428	0.146232	-3.2512	0.0011492	0.023608	Diet_Effect	ENSMUSG00000019558	Slc6a8	protein_coding	ensembl_havana	73673150	73682502
42.1855	0.991507	0.6312	1.57083	0.116222	0.453711	Diet_Effect	ENSMUSG00000019564	Arid3a	protein_coding	ensembl_havana	79927043	79955018
8438.29	0.67978	0.132512	5.12994	2.89827e-07	2.79615e-05	Diet_Effect	ENSMUSG00000019577	Pdk4	protein_coding	ensembl_havana	5483351	5496309
378.384	0.235959	0.166156	1.4201	0.155578	0.519509	Diet_Effect	ENSMUSG00000019578	Ubxn6	protein_coding	ensembl_havana	56067045	56075028
5638.89	-0.171249	0.118086	-1.4502	0.147002	0.506495	Diet_Effect	ENSMUSG00000019579	Mydgf	protein_coding	ensembl_havana	56175744	56183920
8242.18	0.0929681	0.0877105	1.05994	0.28917	0.685784	Diet_Effect	ENSMUSG00000019590	Cyb561	protein_coding	ensembl_havana	105933702	105953336
6254.62	-0.389128	0.117535	-3.31075	0.000930457	0.0201239	Diet_Effect	ENSMUSG00000019647	Sema6a	protein_coding	ensembl_havana	47235598	47368870
3896.63	0.122699	0.0976947	1.25594	0.209138	0.597672	Diet_Effect	ENSMUSG00000019659	Ccdc12	protein_coding	ensembl_havana	110656503	110711606
834.991	-0.17632	0.177966	-0.990753	0.321806	0.713932	Diet_Effect	ENSMUSG00000019689	Fmc1	protein_coding	ensembl_havana	38533502	38539449
86.9496	-0.37916	0.501705	-0.755744	0.449803	0.812281	Diet_Effect	ENSMUSG00000019699	Akt3	protein_coding	ensembl_havana	177020073	177258203
1936.86	0.0726	0.106637	0.680814	0.495989	0.841119	Diet_Effect	ENSMUSG00000019710	Mrpl24	protein_coding	ensembl_havana	87919506	87923672
3728.84	0.241012	0.133447	1.80605	0.0709108	0.349939	Diet_Effect	ENSMUSG00000019715	Gle1	protein_coding	ensembl_havana	29935426	29960371
707.799	0.14222	0.142344	0.99913	0.317732	0.710566	Diet_Effect	ENSMUSG00000019718	L3hypdh	protein_coding	ensembl_havana	72073428	72085439
479.379	-0.106878	0.192186	-0.556118	0.57813	0.88128	Diet_Effect	ENSMUSG00000019726	Lyst	protein_coding	ensembl_havana	13590397	13778803
630.792	-0.199773	0.156057	-1.28013	0.200499	0.587189	Diet_Effect	ENSMUSG00000019731	Slc35e1	protein_coding	ensembl_havana	72480641	72492614
297.743	-0.518623	0.257229	-2.01619	0.0437797	0.269268	Diet_Effect	ENSMUSG00000019732	Calr3	protein_coding	ensembl_havana	72424176	72443870
7734.65	-0.0543533	0.0960544	-0.565859	0.571489	0.878042	Diet_Effect	ENSMUSG00000019734	Tmc4	protein_coding	ensembl_havana	3665790	3677553
564.581	-0.22835	0.15251	-1.49728	0.13432	0.485982	Diet_Effect	ENSMUSG00000019737	Syne4	protein_coding	ensembl_havana	30314807	30319046
1105.27	-0.0339134	0.128983	-0.262929	0.792605	0.954673	Diet_Effect	ENSMUSG00000019738	Polr2i	protein_coding	ensembl_havana	30231948	30233390
312.355	0.11953	0.192376	0.621335	0.534379	0.861688	Diet_Effect	ENSMUSG00000019761	Krt10	protein_coding	ensembl_havana	99385254	99389364
1727.53	-0.193406	0.129632	-1.49197	0.135708	0.489004	Diet_Effect	ENSMUSG00000019762	Iyd	protein_coding	ensembl_havana	3540240	3554877
864.792	0.164581	0.139223	1.18213	0.237153	0.632785	Diet_Effect	ENSMUSG00000019763	Rmnd1	protein_coding	ensembl_havana	4401915	4432388
2.49876	0.485081	3.37297	0.143814	0.885647		Diet_Effect	ENSMUSG00000019767	Ccdc170	protein_coding	ensembl_havana	4482502	4562231
190.405	-0.837207	0.353273	-2.36986	0.017795	0.155776	Diet_Effect	ENSMUSG00000019768	Esr1	protein_coding	ensembl_havana	4611593	5005614
264.272	0.817104	0.27196	3.0045	0.00266014	0.0434946	Diet_Effect	ENSMUSG00000019773	Fbxo5	protein_coding	ensembl_havana	5799160	5805600
621.769	0.0564322	0.155283	0.363416	0.716294	0.932844	Diet_Effect	ENSMUSG00000019774	Mtrf1l	protein_coding	ensembl_havana	5811887	5823910
19.6449	-1.0033	0.753393	-1.33171	0.182956	0.564049	Diet_Effect	ENSMUSG00000019775	Rgs17	protein_coding	ensembl_havana	5825663	5922400
1108.91	-0.141839	0.161752	-0.876894	0.380544	0.763473	Diet_Effect	ENSMUSG00000019777	Hdac2	protein_coding	ensembl_havana	36974544	37001889
5341.44	-0.368079	0.104323	-3.52828	0.000418272	0.0111703	Diet_Effect	ENSMUSG00000019779	Frk	protein_coding	ensembl_havana	34483399	34611278
936.646	-0.0768434	0.123143	-0.624016	0.532617	0.860848	Diet_Effect	ENSMUSG00000019782	Rwdd1	protein_coding	ensembl_havana	33996555	34019624
1.49346	-0.441371	3.36179	-0.13129	0.895546		Diet_Effect	ENSMUSG00000019785	Clvs2	protein_coding	ensembl_havana	33512286	33624769
4.202	1.82408	1.91852	0.950775	0.341719		Diet_Effect	ENSMUSG00000019789	Hey2	protein_coding	ensembl_havana	30832359	30842801
462.753	-0.0659271	0.188748	-0.349287	0.726874	0.936454	Diet_Effect	ENSMUSG00000019790	Stxbp5	protein_coding	ensembl_havana	9755547	9901079
590.821	-0.0566668	0.148171	-0.382442	0.702133	0.927051	Diet_Effect	ENSMUSG00000019791	Hint3	protein_coding	ensembl_havana	30608141	30629632
661.988	0.179288	0.168071	1.06674	0.286089	0.682252	Diet_Effect	ENSMUSG00000019792	Trmt11	protein_coding	ensembl_havana	30534225	30600749
2313.81	-0.127624	0.111161	-1.1481	0.250927	0.647623	Diet_Effect	ENSMUSG00000019794	Katna1	protein_coding	ensembl_havana	7726000	7763150
4672.05	-0.107792	0.0964482	-1.11762	0.26373	0.660589	Diet_Effect	ENSMUSG00000019795	Pcmt1	protein_coding	ensembl_havana	7629373	7681136
48.6695	0.737674	0.533667	1.38228	0.166887	0.540842	Diet_Effect	ENSMUSG00000019796	Lrp11	protein_coding	ensembl_havana	7589800	7625483
1079.47	-0.456781	0.125284	-3.64596	0.0002664	0.00773063	Diet_Effect	ENSMUSG00000019797	Mtres1	protein_coding	ensembl_havana	43525133	43540994
1017.31	-0.26224	0.14234	-1.84236	0.0654231	0.334689	Diet_Effect	ENSMUSG00000019802	Sec63	protein_coding	ensembl_havana	42761496	42832514
8844.51	0.0130105	0.0921113	0.141248	0.887674	0.979764	Diet_Effect	ENSMUSG00000019804	Snx3	protein_coding	ensembl_havana	42502030	42535381
3546.02	-0.0193387	0.105703	-0.182952	0.854836	0.97121	Diet_Effect	ENSMUSG00000019806	Aig1	protein_coding	ensembl_havana	13647054	13868980
120.987	0.102674	0.347695	0.295299	0.767765	0.946519	Diet_Effect	ENSMUSG00000019808	Adat2	protein_coding	ensembl_havana	13552894	13563376
1033.25	0.189324	0.131475	1.44	0.149866	0.511474	Diet_Effect	ENSMUSG00000019809	Pex3	protein_coding	ensembl_havana	13523842	13553142
4127.96	0.0549463	0.0883962	0.621592	0.53421	0.861534	Diet_Effect	ENSMUSG00000019810	Fuca2	protein_coding	ensembl_havana	13499540	13519035
742.922	0.301037	0.142575	2.11143	0.0347354	0.23532	Diet_Effect	ENSMUSG00000019813	Cep57l1	protein_coding	ensembl_havana	41718840	41809871
1763.28	-0.122556	0.112489	-1.0895	0.275934	0.673897	Diet_Effect	ENSMUSG00000019814	Ltv1	protein_coding	ensembl_havana	13178140	13193168
0.940647	-0.215506	3.36349	-0.0640721	0.948913		Diet_Effect	ENSMUSG00000019815	Zc2hc1b	protein_coding	ensembl_havana	13149540	13178023
2866.39	-0.697723	0.10589	-6.58912	4.42453e-11	1.18161e-08	Diet_Effect	ENSMUSG00000019817	Plagl1	protein_coding	ensembl_havana	13060504	13131694
22910.5	-0.162042	0.087688	-1.84793	0.064612	0.332626	Diet_Effect	ENSMUSG00000019818	Cd164	protein_coding	ensembl_havana	41519414	41531048
2441.71	0.0277271	0.109686	0.252785	0.800434	0.956037	Diet_Effect	ENSMUSG00000019820	Utrn	protein_coding	ensembl_havana	12382188	12869365
3517.13	0.24361	0.119903	2.03174	0.0421803	0.263835	Diet_Effect	ENSMUSG00000019822	Smpd2	protein_coding	ensembl_havana	41485642	41490369
1484.63	0.0873686	0.124055	0.704274	0.481262	0.831978	Diet_Effect	ENSMUSG00000019823	Mical1	protein_coding	ensembl_havana	41476314	41487032
1504.79	0.351708	0.132926	2.6459	0.00814749	0.0928767	Diet_Effect	ENSMUSG00000019826	Zbtb24	protein_coding	ensembl_havana	41450383	41465574
156.843	0.560988	0.283184	1.981	0.0475913	0.282164	Diet_Effect	ENSMUSG00000019831	Wasf1	protein_coding	ensembl_havana	40883475	40938570
6073.28	0.0203775	0.0883904	0.23054	0.817672	0.961384	Diet_Effect	ENSMUSG00000019832	Rab32	protein_coding	ensembl_havana	10545002	10558265
2.44209	2.91232	2.0235	1.43925	0.15008		Diet_Effect	ENSMUSG00000019836	Amd-ps4	processed_pseudogene	havana	51253025	51254027
3305.58	0.290761	0.11123	2.61406	0.00894742	0.0984323	Diet_Effect	ENSMUSG00000019837	Gtf3c6	protein_coding	ensembl_havana	40247703	40258108
3200.83	-0.599581	0.144705	-4.14347	3.42089e-05	0.00154124	Diet_Effect	ENSMUSG00000019838	Slc16a10	protein_coding	ensembl_havana	40033532	40142258
825.967	-0.0658001	0.13519	-0.486722	0.626456	0.902474	Diet_Effect	ENSMUSG00000019841	Rev3l	protein_coding	ensembl_havana	39732118	39875211
1394.85	-0.293309	0.130576	-2.24627	0.0246867	0.190654	Diet_Effect	ENSMUSG00000019842	Traf3ip2	protein_coding	ensembl_havana	39612934	39655307
25.6687	-0.785534	0.670287	-1.17194	0.241223	0.637795	Diet_Effect	ENSMUSG00000019843	Fyn	protein_coding	ensembl_havana	39368855	39565381
173.829	0.117962	0.301729	0.390952	0.695832	0.92568	Diet_Effect	ENSMUSG00000019845	Tube1	protein_coding	ensembl_havana	39133976	39152542
3402.66	0.136113	0.152527	0.892391	0.372183	0.757203	Diet_Effect	ENSMUSG00000019846	Lama4	protein_coding	ensembl_havana	38965515	39110188
1.1764	-1.13825	3.36531	-0.338231	0.735189		Diet_Effect	ENSMUSG00000019848	Popdc3	protein_coding	ensembl_havana	45178098	45318452
1487.55	0.137749	0.125312	1.09925	0.27166	0.669771	Diet_Effect	ENSMUSG00000019849	Prep	protein_coding	ensembl_havana	45067203	45167198
19441.7	-0.111147	0.145983	-0.761369	0.446437	0.811065	Diet_Effect	ENSMUSG00000019850	Tnfaip3	protein_coding	ensembl_havana	19000910	19015657
5683.76	-0.141815	0.0960661	-1.47622	0.139884	0.495807	Diet_Effect	ENSMUSG00000019851	Perp	protein_coding	ensembl_havana	18845020	18857073
611.686	-0.146828	0.167265	-0.877818	0.380042	0.763025	Diet_Effect	ENSMUSG00000019852	Arfgef3	protein_coding	ensembl_havana	18581839	18743949
2236.1	0.0381398	0.106127	0.359379	0.719312	0.93321	Diet_Effect	ENSMUSG00000019853	Hebp2	protein_coding	ensembl_havana	18539498	18546076
714.971	-0.424274	0.17477	-2.42761	0.0151986	0.139893	Diet_Effect	ENSMUSG00000019854	Reps1	protein_coding	ensembl_havana	18055861	18125155
37.6043	-0.609608	0.561499	-1.08568	0.277621	0.6757	Diet_Effect	ENSMUSG00000019856	Fam184a	protein_coding	ensembl_havana	53633145	53751123
657.975	0.0483036	0.148823	0.324571	0.745506	0.940628	Diet_Effect	ENSMUSG00000019857	Asf1a	protein_coding	ensembl_havana	53596757	53609225
629.974	-0.00200254	0.160392	-0.0124853	0.990038	0.998919	Diet_Effect	ENSMUSG00000019861	Gopc	protein_coding	ensembl_havana	52335850	52382124
509.206	0.151719	0.194074	0.781758	0.434357	0.802878	Diet_Effect	ENSMUSG00000019863	Qrsl1	protein_coding	ensembl_havana	43874188	43901745
643.699	-0.338173	0.189528	-1.7843	0.0743757	0.358494	Diet_Effect	ENSMUSG00000019864	Rtn4ip1	protein_coding	ensembl_havana	43901807	43957201
7.94978	0.747981	1.32888	0.562864	0.573528	0.879454	Diet_Effect	ENSMUSG00000019865	Nmbr	protein_coding	ensembl_havana	14705591	14770850
2486.22	0.00135137	0.162851	0.00829821	0.993379	0.998919	Diet_Effect	ENSMUSG00000019866	Crybg1	protein_coding	ensembl_havana	43950636	44148853
1791.2	0.138103	0.102284	1.35019	0.176957	0.554272	Diet_Effect	ENSMUSG00000019868	Vta1	protein_coding	ensembl_havana	14654755	14705560
7947.5	-0.191738	0.0990076	-1.9366	0.0527944	0.298505	Diet_Effect	ENSMUSG00000019872	Smpdl3a	protein_coding	ensembl_havana	57794335	57811830
1675.7	-0.295464	0.128323	-2.3025	0.0213068	0.173113	Diet_Effect	ENSMUSG00000019873	Reep3	protein_coding	ensembl_havana	67009189	67096945
4.67885	-0.508589	2.27414	-0.22364	0.823037		Diet_Effect	ENSMUSG00000019874	Fabp7	protein_coding	ensembl_havana	57784881	57788450
39.0988	-0.00970291	0.535379	-0.0181234	0.98554	0.998573	Diet_Effect	ENSMUSG00000019876	Pkib	protein_coding	ensembl_havana	57631981	57741112
8365.65	0.0750011	0.0955772	0.784718	0.432619	0.801437	Diet_Effect	ENSMUSG00000019877	Serinc1	protein_coding	ensembl_havana	57515774	57532530
1435.5	-0.0141529	0.133247	-0.106216	0.915411	0.987168	Diet_Effect	ENSMUSG00000019878	Hsf2	protein_coding	ensembl_havana	57486385	57513135
2.76804	0.318138	2.17283	0.146417	0.883592		Diet_Effect	ENSMUSG00000019880	Rspo3	protein_coding	ensembl_havana	29452416	29535867
289.642	-0.00386136	0.220945	-0.0174766	0.986056	0.998573	Diet_Effect	ENSMUSG00000019883	Echdc1	protein_coding	ensembl_havana	29313166	29347469
8528.98	-0.0432108	0.103419	-0.417822	0.676077	0.919483	Diet_Effect	ENSMUSG00000019889	Ptprk	protein_coding	ensembl_havana	28074820	28597397
2669.95	0.107826	0.110338	0.977234	0.328453	0.721384	Diet_Effect	ENSMUSG00000019891	Dcbld1	protein_coding	ensembl_havana	52233619	52321378
74.5282	0.601861	0.35689	1.68641	0.0917178	0.401515	Diet_Effect	ENSMUSG00000019892	Lrriq1	protein_coding	ensembl_havana	103046031	103236322
11.1863	-2.22202	1.36884	-1.62329	0.104528	0.427928	Diet_Effect	ENSMUSG00000019893	Ros1	protein_coding	ensembl_havana	52045721	52195244
1770.83	-0.157002	0.108593	-1.44578	0.148239	0.508584	Diet_Effect	ENSMUSG00000019897	Ccdc59	protein_coding	ensembl_havana	105841067	105847833
123.39	-2.33003	0.353084	-6.59906	4.1376e-11	1.13796e-08	Diet_Effect	ENSMUSG00000019899	Lama2	protein_coding	ensembl_havana	26980036	27619758
3.79068	-1.42686	2.67569	-0.533269	0.593847		Diet_Effect	ENSMUSG00000019906	Lin7a	protein_coding	ensembl_havana	107271686	107421474
3929.16	-0.0188699	0.109945	-0.17163	0.863729	0.973731	Diet_Effect	ENSMUSG00000019907	Ppp1r12a	protein_coding	ensembl_havana	108162193	108284475
2681.98	-0.487959	0.130127	-3.74987	0.000176926	0.0055635	Diet_Effect	ENSMUSG00000019916	P4ha1	protein_coding	ensembl_havana	59323296	59373304
955.02	0.437328	0.160386	2.72672	0.00639672	0.0791621	Diet_Effect	ENSMUSG00000019917	Septin10	protein_coding	ensembl_havana	59141627	59221847
[truncated: 22,638 more rows]
