# Supplementary material for: Hepatic lipid overload triggers biliary epithelial cell activation via E2Fs
Source: eLife. 2023 Mar 6;12:e81926. doi: 10.7554/eLife.81926 (PMC10030116; doi:10.7554/eLife.81926)
Supplement: Supplementary file 2. — Related to Figure 3. [file elife-81926-supp2.xlsx]

## Sheet: HFD GO UP
ID	Description	GeneRatio	BgRatio	pvalue	p.adjust	qvalue	geneID	Count
GO_BP_MM_MITOSIS	GO_BP_MM_MITOSIS	20/101	191/17799	4.68514e-20	2.09426e-17	1.70638e-17	UBE2C/SPC25/CDC20/CDK1/CDCA3/NDC80/CDCA5/CEP55/HELLS/TPX2/DSN1/CCNA2/KIF2C/PLK1/CCNB2/ASPM/ANLN/TIMELESS/CDC25C/SPC24	20
GO_BP_MM_CELL_DIVISION	GO_BP_MM_CELL_DIVISION	20/101	253/17799	1.27938e-17	2.85942e-15	2.32982e-15	UBE2C/SPAG5/SPC25/MCM5/CDC20/CDK1/CDCA3/NDC80/CDCA5/CEP55/HELLS/NEK2/TPX2/DSN1/CCNA2/KIF2C/CCNB2/TIMELESS/CDC25C/SPC24	20
GO_BP_MM_CHROMOSOME_SEGREGATION	GO_BP_MM_CHROMOSOME_SEGREGATION	10/101	60/17799	1.30791e-12	1.94878e-10	1.58785e-10	SPAG5/SPC25/BRCA1/TOP2A/NDC80/CENPF/NEK2/DSN1/KIF2C/ESPL1	10
GO_CC_MM_CONDENSED_CHROMOSOME_KINETOCHORE	GO_CC_MM_CONDENSED_CHROMOSOME_KINETOCHORE	9/101	58/17799	3.58837e-11	4.01001e-09	3.26731e-09	SPAG5/SPC25/CENPK/NDC80/NEK2/BUB1/KIF2C/CENPM/SPC24	9
GO_CC_MM_MIDBODY	GO_CC_MM_MIDBODY	9/101	71/17799	2.36187e-10	2.11151e-08	1.72043e-08	CDK1/AURKB/RACGAP1/CEP55/CENPF/NEK2/ECT2/PLK1/ASPM	9
GO_CC_MM_CHROMOSOME_CENTROMERIC_REGION	GO_CC_MM_CHROMOSOME_CENTROMERIC_REGION	8/101	56/17799	9.20379e-10	6.80508e-08	5.5447e-08	DSCC1/HELLS/CENPF/BUB1/KIF2C/CENPA/MKI67/CENPE	8
GO_CC_MM_KINETOCHORE	GO_CC_MM_KINETOCHORE	8/101	57/17799	1.06567e-09	6.80508e-08	5.5447e-08	SPAG5/NDC80/CENPF/NEK2/BUB1/KIF2C/PLK1/CENPE	8
GO_BP_MM_CYTOKINESIS	GO_BP_MM_CYTOKINESIS	7/101	39/17799	2.03378e-09	1.13638e-07	9.25907e-08	KIF20A/AURKB/RACGAP1/CEP55/PLK1/ANLN/PRC1	7
GO_CC_MM_SPINDLE_POLE	GO_CC_MM_SPINDLE_POLE	8/101	72/17799	7.19846e-09	3.57523e-07	2.91306e-07	SPAG5/CDC20/CENPF/NEK2/TPX2/PLK1/ASPM/PRC1	8
GO_CC_MM_SPINDLE	GO_CC_MM_SPINDLE	8/101	89/17799	3.92446e-08	1.75423e-06	1.42933e-06	SPAG5/KIF20A/AURKB/CENPF/TPX2/KIF22/PLK1/PRC1	8
GO_BP_MM_DNA_REPLICATION	GO_BP_MM_DNA_REPLICATION	8/101	112/17799	2.37403e-07	9.64718e-06	7.86041e-06	CHAF1A/MCM5/BRCA1/POLE2/DSCC1/POLQ/DTL/MCM3	8
GO_BP_MM_DNA_REPAIR	GO_BP_MM_DNA_REPAIR	9/101	222/17799	4.80134e-06	0.00017885	0.000145725	UHRF1/CHAF1A/BRCA1/RAD51/KIF22/POLQ/PARPBP/FIGNL1/RAD54B	9
GO_CC_MM_MICROTUBULE	GO_CC_MM_MICROTUBULE	9/101	242/17799	9.63784e-06	0.000331393	0.000270016	KIF20A/GTSE1/NEK2/TPX2/KIF2C/KIF22/PRC1/KIF14/CENPE	9
GO_CC_MM_CONDENSED_CHROMOSOME	GO_CC_MM_CONDENSED_CHROMOSOME	4/101	26/17799	1.32645e-05	0.000423518	0.000345077	BRCA1/TOP2A/RAD51/MKI67	4
GO_BP_MM_MITOTIC_SISTER_CHROMATID_SEGREGATION	GO_BP_MM_MITOTIC_SISTER_CHROMATID_SEGREGATION	3/101	10/17799	2.06753e-05	0.000543638	0.00044295	SPAG5/NEK2/ESPL1	3
GO_CC_MM_CONDENSED_NUCLEAR_CHROMOSOME_CENTROMERIC_REGION	GO_CC_MM_CONDENSED_NUCLEAR_CHROMOSOME_CENTROMERIC_REGION	3/101	10/17799	2.06753e-05	0.000543638	0.00044295	AURKB/BUB1/CENPA	3
GO_CC_MM_MITOTIC_SPINDLE	GO_CC_MM_MITOTIC_SPINDLE	3/101	10/17799	2.06753e-05	0.000543638	0.00044295	SPAG5/RACGAP1/ECT2	3
GO_BP_MM_POSITIVE_REGULATION_OF_CELL_CYCLE_CYTOKINESIS	GO_BP_MM_POSITIVE_REGULATION_OF_CELL_CYCLE_CYTOKINESIS	3/101	12/17799	3.75927e-05	0.000933553	0.000760648	AURKB/RACGAP1/ECT2	3
GO_MF_MM_MICROTUBULE_MOTOR_ACTIVITY	GO_MF_MM_MICROTUBULE_MOTOR_ACTIVITY	5/101	68/17799	4.18113e-05	0.000983666	0.00080148	KIF20A/KIF2C/KIF22/KIF14/CENPE	5
GO_MF_MM_SERINE-TYPE_ENDOPEPTIDASE_INHIBITOR_ACTIVITY	GO_MF_MM_SERINE-TYPE_ENDOPEPTIDASE_INHIBITOR_ACTIVITY	6/101	118/17799	5.6703e-05	0.00126731	0.00103259	ITIH4/SERPINF2/MUG1/SERPINA6/SERPINA1A/SERPINA1B	6
GO_CC_MM_CENTROSOME	GO_CC_MM_CENTROSOME	9/101	308/17799	6.41351e-05	0.00136516	0.00111232	CDC20/NCAPG/CEP55/NEK2/PLK1/CCNB2/DTL/MCM3/ESPL1	9
GO_BP_MM_MICROTUBULE-BASED_MOVEMENT	GO_BP_MM_MICROTUBULE-BASED_MOVEMENT	5/101	83/17799	0.00010889	0.00214854	0.00175061	KIF20A/KIF2C/KIF22/KIF14/CENPE	5
GO_MF_MM_PROTEIN_KINASE_BINDING	GO_MF_MM_PROTEIN_KINASE_BINDING	8/101	258/17799	0.000110551	0.00214854	0.00175061	KIF20A/RACGAP1/TPX2/CCNA2/PLK1/CCNB2/PRC1/CDC25C	8
GO_CC_MM_MICROTUBULE_CYTOSKELETON	GO_CC_MM_MICROTUBULE_CYTOSKELETON	5/101	91/17799	0.000168278	0.00313418	0.00255369	TPX2/KIF2C/CCNB2/PRC1/CENPE	5
GO_BP_MM_G2_M_TRANSITION_DNA_DAMAGE_CHECKPOINT	GO_BP_MM_G2_M_TRANSITION_DNA_DAMAGE_CHECKPOINT	3/101	23/17799	0.000289197	0.00517084	0.00421314	BRCA1/PLK1/DTL	3
GO_BP_MM_CELL_CYCLE	GO_BP_MM_CELL_CYCLE	7/101	228/17799	0.000319992	0.00542276	0.0044184	UHRF1/CHAF1A/CDK1/AURKB/MELK/PRC1/MCM3	7
GO_BP_MM_ORGAN_REGENERATION	GO_BP_MM_ORGAN_REGENERATION	4/101	58/17799	0.000327549	0.00542276	0.0044184	CDK1/CCKAR/MKI67/SOCS3	4
GO_BP_MM_REGULATION_OF_PROTEOLYSIS	GO_BP_MM_REGULATION_OF_PROTEOLYSIS	4/101	62/17799	0.000423268	0.00675717	0.00550566	SERPINF2/SERPINA6/SERPINA1A/SERPINA1B	4
GO_BP_MM_NEGATIVE_REGULATION_OF_ENDOPEPTIDASE_ACTIVITY	GO_BP_MM_NEGATIVE_REGULATION_OF_ENDOPEPTIDASE_ACTIVITY	4/101	65/17799	0.000507072	0.00781591	0.00636831	SERPINF2/SERPINA6/SERPINA1A/SERPINA1B	4
GO_BP_MM_ACUTE-PHASE_RESPONSE	GO_BP_MM_ACUTE-PHASE_RESPONSE	3/101	29/17799	0.000582124	0.00867365	0.00706719	SERPINF2/SERPINA1A/SERPINA1B	3
GO_CC_MM_SPINDLE_MICROTUBULE	GO_CC_MM_SPINDLE_MICROTUBULE	3/101	30/17799	0.00064415	0.00928823	0.00756794	SPAG5/CDK1/PLK1	3
GO_CC_MM_CLEAVAGE_FURROW	GO_CC_MM_CLEAVAGE_FURROW	3/101	31/17799	0.000710239	0.00962051	0.00783868	RACGAP1/CEP55/ECT2	3
GO_CC_MM_CONDENSED_NUCLEAR_CHROMOSOME	GO_CC_MM_CONDENSED_NUCLEAR_CHROMOSOME	3/101	31/17799	0.000710239	0.00962051	0.00783868	BRCA1/NEK2/RAD51	3
GO_BP_MM_PROTEIN_UBIQUITINATION	GO_BP_MM_PROTEIN_UBIQUITINATION	7/101	268/17799	0.000837089	0.0109199	0.0088974	UHRF1/UBE2C/CDC20/CDCA3/PLK1/RNF182/SOCS3	7
GO_BP_MM_BRANCHING_MORPHOGENESIS_OF_A_TUBE	GO_BP_MM_BRANCHING_MORPHOGENESIS_OF_A_TUBE	3/101	33/17799	0.000855025	0.0109199	0.0088974	SLIT2/MYCN/TIMELESS	3
GO_BP_MM_CELLULAR_RESPONSE_TO_HORMONE_STIMULUS	GO_BP_MM_CELLULAR_RESPONSE_TO_HORMONE_STIMULUS	3/101	34/17799	0.000933923	0.0115962	0.00944847	HMGCS2/CCKAR/SLIT2	3
GO_CC_MM_CHROMATIN	GO_CC_MM_CHROMATIN	4/101	77/17799	0.000962237	0.0116249	0.00947181	ASF1B/DSCC1/KIF22/PARPBP	4
GO_MF_MM_PROTEIN_C-TERMINUS_BINDING	GO_MF_MM_PROTEIN_C-TERMINUS_BINDING	5/101	145/17799	0.00141682	0.0166663	0.0135795	CDC20/TOP2A/CENPF/RAD51/MKI67	5
GO_MF_MM_NUCLEOSIDE-TRIPHOSPHATASE_ACTIVITY	GO_MF_MM_NUCLEOSIDE-TRIPHOSPHATASE_ACTIVITY	5/101	148/17799	0.00155099	0.0177767	0.0144843	TRIP13/RAD51/ABCC6/FIGNL1/MCM3	5
GO_BP_MM_REGULATION_OF_CELL_CYCLE	GO_BP_MM_REGULATION_OF_CELL_CYCLE	4/101	89/17799	0.00164838	0.01805	0.014707	CCNA2/CCNB2/FIGNL1/DTL	4
GO_BP_MM_DNA-DEPENDENT_DNA_REPLICATION_INITIATION	GO_BP_MM_DNA-DEPENDENT_DNA_REPLICATION_INITIATION	2/101	11/17799	0.00169598	0.01805	0.014707	MCM5/MCM3	2
GO_CC_MM_SPINDLE_MIDZONE	GO_CC_MM_SPINDLE_MIDZONE	2/101	11/17799	0.00169598	0.01805	0.014707	RACGAP1/PLK1	2
GO_BP_MM_DNA-DEPENDENT_DNA_REPLICATION	GO_BP_MM_DNA-DEPENDENT_DNA_REPLICATION	2/101	12/17799	0.00202765	0.0201414	0.0164109	TOP2A/POLE2	2
GO_BP_MM_MITOTIC_CHROMOSOME_CONDENSATION	GO_BP_MM_MITOTIC_CHROMOSOME_CONDENSATION	2/101	12/17799	0.00202765	0.0201414	0.0164109	NCAPG/CDCA5	2
GO_MF_MM_ACYL-COA_HYDROLASE_ACTIVITY	GO_MF_MM_ACYL-COA_HYDROLASE_ACTIVITY	2/101	12/17799	0.00202765	0.0201414	0.0164109	ACOT3/ACOT1	2
GO_BP_MM_RESPONSE_TO_PEPTIDE_HORMONE_STIMULUS	GO_BP_MM_RESPONSE_TO_PEPTIDE_HORMONE_STIMULUS	4/101	96/17799	0.00217599	0.0211449	0.0172287	HMGCS2/SOCS3/SERPINA1A/SERPINA1B	4
GO_MF_MM_THIOLESTER_HYDROLASE_ACTIVITY	GO_MF_MM_THIOLESTER_HYDROLASE_ACTIVITY	2/101	13/17799	0.00238747	0.0226272	0.0184364	ACOT3/ACOT1	2
GO_BP_MM_CELL_PROLIFERATION	GO_BP_MM_CELL_PROLIFERATION	5/101	164/17799	0.00242976	0.0226272	0.0184364	UHRF1/AURKB/BUB1/MKI67/MELK	5
GO_BP_MM_MEIOSIS	GO_BP_MM_MEIOSIS	3/101	48/17799	0.00254874	0.0232508	0.0189445	NEK2/RAD51/MKI67	3
GO_MF_MM_PALMITOYL-COA_HYDROLASE_ACTIVITY	GO_MF_MM_PALMITOYL-COA_HYDROLASE_ACTIVITY	2/101	14/17799	0.0027751	0.0248094	0.0202144	ACOT3/ACOT1	2
GO_MF_MM_CARBOXYLESTERASE_ACTIVITY	GO_MF_MM_CARBOXYLESTERASE_ACTIVITY	3/101	50/17799	0.00286471	0.0251083	0.020458	ACOT3/MGLL/ACOT1	3
GO_BP_MM_LONG-CHAIN_FATTY_ACID_METABOLIC_PROCESS	GO_BP_MM_LONG-CHAIN_FATTY_ACID_METABOLIC_PROCESS	2/101	15/17799	0.00319022	0.0274236	0.0223445	ACOT3/ACOT1	2
GO_BP_MM_CHROMOSOME_CONDENSATION	GO_BP_MM_CHROMOSOME_CONDENSATION	2/101	16/17799	0.00363252	0.0284866	0.0232106	CDK1/TOP2A	2
GO_BP_MM_DEFENSE_RESPONSE_TO_PROTOZOAN	GO_BP_MM_DEFENSE_RESPONSE_TO_PROTOZOAN	2/101	16/17799	0.00363252	0.0284866	0.0232106	GBP3/GBP10	2
GO_BP_MM_ESTABLISHMENT_OF_MITOTIC_SPINDLE_ORIENTATION	GO_BP_MM_ESTABLISHMENT_OF_MITOTIC_SPINDLE_ORIENTATION	2/101	16/17799	0.00363252	0.0284866	0.0232106	NDC80/CENPA	2
GO_BP_MM_MICROTUBULE_BUNDLE_FORMATION	GO_BP_MM_MICROTUBULE_BUNDLE_FORMATION	2/101	16/17799	0.00363252	0.0284866	0.0232106	KIF20A/PLK1	2
GO_BP_MM_RECIPROCAL_MEIOTIC_RECOMBINATION	GO_BP_MM_RECIPROCAL_MEIOTIC_RECOMBINATION	2/101	16/17799	0.00363252	0.0284866	0.0232106	TRIP13/RAD51	2
GO_MF_MM_HELICASE_ACTIVITY	GO_MF_MM_HELICASE_ACTIVITY	4/101	117/17799	0.00443647	0.0341914	0.0278588	HELLS/POLQ/MCM3/RAD54B	4
GO_BP_MM_MITOTIC_CELL_CYCLE	GO_BP_MM_MITOTIC_CELL_CYCLE	2/101	18/17799	0.00459739	0.0342506	0.027907	CDK1/CENPF	2
GO_BP_MM_PROTEIN_N-LINKED_GLYCOSYLATION	GO_BP_MM_PROTEIN_N-LINKED_GLYCOSYLATION	2/101	18/17799	0.00459739	0.0342506	0.027907	SERPINA1A/SERPINA1B	2
GO_MF_MM_PROTEIN_SERINE_THREONINE_KINASE_ACTIVITY	GO_MF_MM_PROTEIN_SERINE_THREONINE_KINASE_ACTIVITY	7/101	368/17799	0.00497974	0.0364909	0.0297323	AURKB/PBK/NEK2/BUB1/PLK1/MELK/TTK	7
GO_CC_MM_ANAPHASE-PROMOTING_COMPLEX	GO_CC_MM_ANAPHASE-PROMOTING_COMPLEX	2/101	19/17799	0.00511933	0.0369087	0.0300728	UBE2C/CDC20	2
GO_BP_MM_ACTIVATION_OF_PROTEIN_KINASE_ACTIVITY	GO_BP_MM_ACTIVATION_OF_PROTEIN_KINASE_ACTIVITY	2/101	20/17799	0.00566721	0.0402102	0.0327628	TPX2/ECT2	2
GO_BP_MM_DNA_METABOLIC_PROCESS	GO_BP_MM_DNA_METABOLIC_PROCESS	2/101	22/17799	0.00683952	0.0470349	0.0383235	RAD51/MKI67	2
GO_CC_MM_SYNAPTONEMAL_COMPLEX	GO_CC_MM_SYNAPTONEMAL_COMPLEX	2/101	22/17799	0.00683952	0.0470349	0.0383235	TOP2A/RAD51	2
GO_BP_MM_RESPONSE_TO_DNA_DAMAGE_STIMULUS	GO_BP_MM_RESPONSE_TO_DNA_DAMAGE_STIMULUS	4/101	137/17799	0.00771299	0.052238	0.0425629	TOP2A/RAD51/DTL/TIMELESS	4
GO_BP_MM_CELLULAR_RESPONSE_TO_INTERFERON-GAMMA	GO_BP_MM_CELLULAR_RESPONSE_TO_INTERFERON-GAMMA	2/101	24/17799	0.00811193	0.053324	0.0434478	GBP3/GBP10	2
GO_BP_MM_OOGENESIS	GO_BP_MM_OOGENESIS	2/101	24/17799	0.00811193	0.053324	0.0434478	TRIP13/ASPM	2
GO_BP_MM_ACYL-COA_METABOLIC_PROCESS	GO_BP_MM_ACYL-COA_METABOLIC_PROCESS	2/101	25/17799	0.00878492	0.056911	0.0463705	ACOT3/ACOT1	2
GO_BP_MM_CELLULAR_RESPONSE_TO_HYDROGEN_PEROXIDE	GO_BP_MM_CELLULAR_RESPONSE_TO_HYDROGEN_PEROXIDE	2/101	26/17799	0.00948206	0.0605497	0.0493352	CDK1/ECT2	2
GO_BP_MM_RESPONSE_TO_STARVATION	GO_BP_MM_RESPONSE_TO_STARVATION	2/101	27/17799	0.010203	0.0624761	0.0509048	HMGCS2/CCKAR	2
GO_MF_MM_DNA-DIRECTED_DNA_POLYMERASE_ACTIVITY	GO_MF_MM_DNA-DIRECTED_DNA_POLYMERASE_ACTIVITY	2/101	27/17799	0.010203	0.0624761	0.0509048	POLE2/POLQ	2
GO_MF_MM_EUKARYOTIC_CELL_SURFACE_BINDING	GO_MF_MM_EUKARYOTIC_CELL_SURFACE_BINDING	2/101	27/17799	0.010203	0.0624761	0.0509048	FGB/SERPINF2	2
GO_BP_MM_RESPONSE_TO_CYTOKINE_STIMULUS	GO_BP_MM_RESPONSE_TO_CYTOKINE_STIMULUS	3/101	81/17799	0.0109898	0.0663846	0.0540894	SOCS3/SERPINA1A/SERPINA1B	3
GO_BP_MM_RESPONSE_TO_NUTRIENT	GO_BP_MM_RESPONSE_TO_NUTRIENT	3/101	84/17799	0.0121247	0.0722634	0.0588794	BRCA1/HMGCS2/CCKAR	3
GO_BP_MM_DOUBLE-STRAND_BREAK_REPAIR_VIA_HOMOLOGOUS_RECOMBINATION	GO_BP_MM_DOUBLE-STRAND_BREAK_REPAIR_VIA_HOMOLOGOUS_RECOMBINATION	2/101	30/17799	0.0125062	0.0726008	0.0591543	BRCA1/RAD51	2
GO_MF_MM_DNA-DEPENDENT_ATPASE_ACTIVITY	GO_MF_MM_DNA-DEPENDENT_ATPASE_ACTIVITY	2/101	30/17799	0.0125062	0.0726008	0.0591543	TOP2A/RAD51	2
GO_BP_MM_DEVELOPMENTAL_GROWTH	GO_BP_MM_DEVELOPMENTAL_GROWTH	2/101	31/17799	0.0133197	0.0763321	0.0621945	DMBX1/ASPM	2
GO_BP_MM_RESPONSE_TO_BACTERIUM	GO_BP_MM_RESPONSE_TO_BACTERIUM	2/101	32/17799	0.0141556	0.0791236	0.064469	HMGCS2/SOCS3	2
GO_MF_MM_MICROTUBULE_BINDING	GO_MF_MM_MICROTUBULE_BINDING	3/101	89/17799	0.0141608	0.0791236	0.064469	SPAG5/RACGAP1/PLK1	3
GO_BP_MM_REGULATION_OF_CYCLIN-DEPENDENT_PROTEIN_KINASE_ACTIVITY	GO_BP_MM_REGULATION_OF_CYCLIN-DEPENDENT_PROTEIN_KINASE_ACTIVITY	2/101	34/17799	0.0158937	0.0877099	0.071465	CCNA2/CCNB2	2
GO_MF_MM_HYDROLASE_ACTIVITY_ACTING_ON_ACID_ANHYDRIDES	GO_MF_MM_HYDROLASE_ACTIVITY_ACTING_ON_ACID_ANHYDRIDES	2/101	35/17799	0.0167953	0.0915551	0.074598	GBP3/GM4841	2
GO_BP_MM_POSITIVE_REGULATION_OF_CELL_DIFFERENTIATION	GO_BP_MM_POSITIVE_REGULATION_OF_CELL_DIFFERENTIATION	2/101	36/17799	0.0177183	0.0947172	0.0771745	SERPINF2/SOCS3	2
GO_BP_MM_RESPONSE_TO_GLUCOCORTICOID_STIMULUS	GO_BP_MM_RESPONSE_TO_GLUCOCORTICOID_STIMULUS	3/101	97/17799	0.0177992	0.0947172	0.0771745	HMGCS2/CCKAR/SOCS3	3
GO_MF_MM_PROTEIN_TYROSINE_KINASE_ACTIVITY	GO_MF_MM_PROTEIN_TYROSINE_KINASE_ACTIVITY	7/101	483/17799	0.020068	0.105534	0.0859881	CDK1/AURKB/PBK/NEK2/PLK1/MELK/TTK	7
GO_BP_MM_BRAIN_DEVELOPMENT	GO_BP_MM_BRAIN_DEVELOPMENT	4/101	184/17799	0.0207716	0.107067	0.0872366	BRCA1/HMGCS2/DMBX1/ASPM	4
GO_BP_MM_LUNG_DEVELOPMENT	GO_BP_MM_LUNG_DEVELOPMENT	3/101	103/17799	0.0208385	0.107067	0.0872366	HMGCS2/MYCN/TIMELESS	3
GO_BP_MM_DOUBLE-STRAND_BREAK_REPAIR	GO_BP_MM_DOUBLE-STRAND_BREAK_REPAIR	2/101	41/17799	0.022644	0.115021	0.0937179	TRIP13/CDCA5	2
GO_MF_MM_DAMAGED_DNA_BINDING	GO_MF_MM_DAMAGED_DNA_BINDING	2/101	43/17799	0.0247545	0.124329	0.101302	BRCA1/RAD51	2
GO_BP_MM_DEFENSE_RESPONSE_TO_GRAM-POSITIVE_BACTERIUM	GO_BP_MM_DEFENSE_RESPONSE_TO_GRAM-POSITIVE_BACTERIUM	2/101	44/17799	0.0258388	0.128333	0.104564	GBP3/GBP10	2
GO_BP_MM_RESPONSE_TO_HEAT	GO_BP_MM_RESPONSE_TO_HEAT	2/101	47/17799	0.029205	0.143457	0.116887	CCKAR/SOCS3	2
GO_MF_MM_HISTONE_BINDING	GO_MF_MM_HISTONE_BINDING	2/101	49/17799	0.031541	0.153248	0.124865	UHRF1/ASF1B	2
GO_BP_MM_POSITIVE_REGULATION_OF_APOPTOTIC_PROCESS	GO_BP_MM_POSITIVE_REGULATION_OF_APOPTOTIC_PROCESS	4/101	211/17799	0.0321715	0.154631	0.125991	TOP2A/ECT2/SLIT2/MELK	4
GO_BP_MM_AGING	GO_BP_MM_AGING	3/101	123/17799	0.0328996	0.156448	0.127472	AURKB/TOP2A/SOCS3	3
GO_CC_MM_MITOCHONDRIAL_MATRIX	GO_CC_MM_MITOCHONDRIAL_MATRIX	3/101	127/17799	0.035666	0.167818	0.136736	BRCA1/RAD51/HMGCS2	3
GO_CC_MM_CENTRIOLE	GO_CC_MM_CENTRIOLE	2/101	53/17799	0.0364249	0.169603	0.138191	TOP2A/CEP55	2
GO_MF_MM_UBIQUITIN-PROTEIN_LIGASE_ACTIVITY	GO_MF_MM_UBIQUITIN-PROTEIN_LIGASE_ACTIVITY	4/101	221/17799	0.0371651	0.171266	0.139546	UBE2C/BRCA1/DTL/RNF182	4
GO_BP_MM_LIPID_METABOLIC_PROCESS	GO_BP_MM_LIPID_METABOLIC_PROCESS	3/101	131/17799	0.0385489	0.17583	0.143264	ACOT3/MGLL/ACOT1	3
GO_BP_MM_CELLULAR_RESPONSE_TO_LIPOPOLYSACCHARIDE	GO_BP_MM_CELLULAR_RESPONSE_TO_LIPOPOLYSACCHARIDE	2/101	58/17799	0.0429082	0.193737	0.157855	HMGCS2/GBP10	2
GO_BP_MM_PROTEIN_HOMOOLIGOMERIZATION	GO_BP_MM_PROTEIN_HOMOOLIGOMERIZATION	3/101	138/17799	0.0438713	0.196105	0.159784	ANGPTL4/RAD51/ECT2	3
GO_BP_MM_PEPTIDYL-SERINE_PHOSPHORYLATION	GO_BP_MM_PEPTIDYL-SERINE_PHOSPHORYLATION	2/101	60/17799	0.0456135	0.201873	0.164484	PBK/PLK1	2
GO_BP_MM_RESPONSE_TO_ORGANIC_CYCLIC_COMPOUND	GO_BP_MM_RESPONSE_TO_ORGANIC_CYCLIC_COMPOUND	3/101	147/17799	0.0512241	0.22083	0.17993	CDK1/HMGCS2/SOCS3	3
GO_BP_MM_LONG_TERM_SYNAPTIC_DEPRESSION	GO_BP_MM_LONG_TERM_SYNAPTIC_DEPRESSION	1/101	10/17799	0.0553311	0.22083	0.17993	MGLL	1
GO_BP_MM_NEGATIVE_REGULATION_OF_REACTIVE_OXYGEN_SPECIES_METABOLIC_PROCESS	GO_BP_MM_NEGATIVE_REGULATION_OF_REACTIVE_OXYGEN_SPECIES_METABOLIC_PROCESS	1/101	10/17799	0.0553311	0.22083	0.17993	MYCN	1
GO_BP_MM_POSITIVE_REGULATION_OF_CELLULAR_PROTEIN_METABOLIC_PROCESS	GO_BP_MM_POSITIVE_REGULATION_OF_CELLULAR_PROTEIN_METABOLIC_PROCESS	1/101	10/17799	0.0553311	0.22083	0.17993	UHRF1	1
GO_BP_MM_POSITIVE_REGULATION_OF_PROTEIN_IMPORT_INTO_NUCLEUS	GO_BP_MM_POSITIVE_REGULATION_OF_PROTEIN_IMPORT_INTO_NUCLEUS	1/101	10/17799	0.0553311	0.22083	0.17993	ECT2	1
GO_BP_MM_POSITIVE_REGULATION_OF_PROTEIN_IMPORT_INTO_NUCLEUS_TRANSLOCATION	GO_BP_MM_POSITIVE_REGULATION_OF_PROTEIN_IMPORT_INTO_NUCLEUS_TRANSLOCATION	1/101	10/17799	0.0553311	0.22083	0.17993	CDK1	1
GO_BP_MM_REGULATION_OF_DNA_REPLICATION	GO_BP_MM_REGULATION_OF_DNA_REPLICATION	1/101	10/17799	0.0553311	0.22083	0.17993	DSCC1	1
GO_BP_MM_RESPONSE_TO_GROWTH_HORMONE_STIMULUS	GO_BP_MM_RESPONSE_TO_GROWTH_HORMONE_STIMULUS	1/101	10/17799	0.0553311	0.22083	0.17993	HMGCS2	1
GO_BP_MM_TRIGLYCERIDE_CATABOLIC_PROCESS	GO_BP_MM_TRIGLYCERIDE_CATABOLIC_PROCESS	1/101	10/17799	0.0553311	0.22083	0.17993	MGLL	1
GO_CC_MM_MHC_CLASS_II_PROTEIN_COMPLEX	GO_CC_MM_MHC_CLASS_II_PROTEIN_COMPLEX	1/101	10/17799	0.0553311	0.22083	0.17993	H2-AA	1
GO_MF_MM_PEPTIDE_ANTIGEN_BINDING	GO_MF_MM_PEPTIDE_ANTIGEN_BINDING	1/101	10/17799	0.0553311	0.22083	0.17993	H2-AA	1
GO_BP_MM_RESPONSE_TO_INSULIN_STIMULUS	GO_BP_MM_RESPONSE_TO_INSULIN_STIMULUS	2/101	69/17799	0.058522	0.226088	0.184214	HMGCS2/SOCS3	2
GO_BP_MM_NEGATIVE_REGULATION_OF_ENDOTHELIAL_CELL_MIGRATION	GO_BP_MM_NEGATIVE_REGULATION_OF_ENDOTHELIAL_CELL_MIGRATION	1/101	11/17799	0.0606946	0.226088	0.184214	SLIT2	1
GO_BP_MM_NEGATIVE_REGULATION_OF_VASCULAR_PERMEABILITY	GO_BP_MM_NEGATIVE_REGULATION_OF_VASCULAR_PERMEABILITY	1/101	11/17799	0.0606946	0.226088	0.184214	SLIT2	1
GO_BP_MM_RESPONSE_TO_AMINE_STIMULUS	GO_BP_MM_RESPONSE_TO_AMINE_STIMULUS	1/101	11/17799	0.0606946	0.226088	0.184214	CDK1	1
GO_BP_MM_RESPONSE_TO_GLUCAGON_STIMULUS	GO_BP_MM_RESPONSE_TO_GLUCAGON_STIMULUS	1/101	11/17799	0.0606946	0.226088	0.184214	HMGCS2	1
GO_BP_MM_VENTRICULAR_CARDIAC_MUSCLE_CELL_DEVELOPMENT	GO_BP_MM_VENTRICULAR_CARDIAC_MUSCLE_CELL_DEVELOPMENT	1/101	11/17799	0.0606946	0.226088	0.184214	CDK1	1
GO_CC_MM_PLATELET_ALPHA_GRANULE	GO_CC_MM_PLATELET_ALPHA_GRANULE	1/101	11/17799	0.0606946	0.226088	0.184214	FGB	1
GO_MF_MM_DYNEIN_BINDING	GO_MF_MM_DYNEIN_BINDING	1/101	11/17799	0.0606946	0.226088	0.184214	CENPF	1
GO_BP_MM_MALE_MEIOSIS_I	GO_BP_MM_MALE_MEIOSIS_I	1/101	12/17799	0.066028	0.227035	0.184985	TRIP13	1
GO_BP_MM_NEGATIVE_CHEMOTAXIS	GO_BP_MM_NEGATIVE_CHEMOTAXIS	1/101	12/17799	0.066028	0.227035	0.184985	SLIT2	1
GO_BP_MM_RESPONSE_TO_LIPID	GO_BP_MM_RESPONSE_TO_LIPID	1/101	12/17799	0.066028	0.227035	0.184985	BRCA1	1
GO_BP_MM_SODIUM_ION_TRANSMEMBRANE_TRANSPORT	GO_BP_MM_SODIUM_ION_TRANSMEMBRANE_TRANSPORT	1/101	12/17799	0.066028	0.227035	0.184985	SLC4A11	1
GO_BP_MM_SYNAPTONEMAL_COMPLEX_ASSEMBLY	GO_BP_MM_SYNAPTONEMAL_COMPLEX_ASSEMBLY	1/101	12/17799	0.066028	0.227035	0.184985	TRIP13	1
GO_BP_MM_TIGHT_JUNCTION_ASSEMBLY	GO_BP_MM_TIGHT_JUNCTION_ASSEMBLY	1/101	12/17799	0.066028	0.227035	0.184985	ECT2	1
GO_BP_MM_TWO-COMPONENT_SIGNAL_TRANSDUCTION_SYSTEM_PHOSPHORELAY	GO_BP_MM_TWO-COMPONENT_SIGNAL_TRANSDUCTION_SYSTEM_PHOSPHORELAY	1/101	12/17799	0.066028	0.227035	0.184985	HMMR	1
GO_BP_MM_VERY_LONG-CHAIN_FATTY_ACID_METABOLIC_PROCESS	GO_BP_MM_VERY_LONG-CHAIN_FATTY_ACID_METABOLIC_PROCESS	1/101	12/17799	0.066028	0.227035	0.184985	ACOT3	1
GO_MF_MM_ANION_TRANSMEMBRANE_TRANSPORTER_ACTIVITY	GO_MF_MM_ANION_TRANSMEMBRANE_TRANSPORTER_ACTIVITY	1/101	12/17799	0.066028	0.227035	0.184985	SLC4A11	1
GO_MF_MM_INORGANIC_ANION_EXCHANGER_ACTIVITY	GO_MF_MM_INORGANIC_ANION_EXCHANGER_ACTIVITY	1/101	12/17799	0.066028	0.227035	0.184985	SLC4A11	1
GO_CC_MM_NUCLEAR_CHROMATIN	GO_CC_MM_NUCLEAR_CHROMATIN	2/101	75/17799	0.0677435	0.228665	0.186314	CDCA5/TIMELESS	2
GO_BP_MM_CELL_MIGRATION_INVOLVED_IN_SPROUTING_ANGIOGENESIS	GO_BP_MM_CELL_MIGRATION_INVOLVED_IN_SPROUTING_ANGIOGENESIS	1/101	13/17799	0.0713314	0.228665	0.186314	SLIT2	1
GO_BP_MM_NEGATIVE_REGULATION_OF_ASTROCYTE_DIFFERENTIATION	GO_BP_MM_NEGATIVE_REGULATION_OF_ASTROCYTE_DIFFERENTIATION	1/101	13/17799	0.0713314	0.228665	0.186314	MYCN	1
GO_BP_MM_POSITIVE_REGULATION_OF_T_CELL_DIFFERENTIATION	GO_BP_MM_POSITIVE_REGULATION_OF_T_CELL_DIFFERENTIATION	1/101	13/17799	0.0713314	0.228665	0.186314	H2-AA	1
GO_BP_MM_TEMPERATURE_HOMEOSTASIS	GO_BP_MM_TEMPERATURE_HOMEOSTASIS	1/101	13/17799	0.0713314	0.228665	0.186314	CCKAR	1
GO_CC_MM_PRONUCLEUS	GO_CC_MM_PRONUCLEUS	1/101	13/17799	0.0713314	0.228665	0.186314	CENPF	1
GO_MF_MM_SODIUM_CHANNEL_ACTIVITY	GO_MF_MM_SODIUM_CHANNEL_ACTIVITY	1/101	13/17799	0.0713314	0.228665	0.186314	SLC4A11	1
GO_CC_MM_GROWTH_CONE	GO_CC_MM_GROWTH_CONE	2/101	80/17799	0.0757688	0.228665	0.186314	NCAM1/LRRTM1	2
GO_BP_MM_ANTIGEN_PROCESSING_AND_PRESENTATION_OF_EXOGENOUS_PEPTIDE_ANTIGEN_VIA_MHC_CLASS_II	GO_BP_MM_ANTIGEN_PROCESSING_AND_PRESENTATION_OF_EXOGENOUS_PEPTIDE_ANTIGEN_VIA_MHC_CLASS_II	1/101	14/17799	0.0766049	0.228665	0.186314	H2-AA	1
GO_BP_MM_MIDGUT_DEVELOPMENT	GO_BP_MM_MIDGUT_DEVELOPMENT	1/101	14/17799	0.0766049	0.228665	0.186314	HMGCS2	1
GO_BP_MM_POSITIVE_REGULATION_OF_PEPTIDYL-THREONINE_PHOSPHORYLATION	GO_BP_MM_POSITIVE_REGULATION_OF_PEPTIDYL-THREONINE_PHOSPHORYLATION	1/101	14/17799	0.0766049	0.228665	0.186314	PLK1	1
GO_BP_MM_REGULATION_OF_PROTEIN_BINDING	GO_BP_MM_REGULATION_OF_PROTEIN_BINDING	1/101	14/17799	0.0766049	0.228665	0.186314	PLK1	1
GO_BP_MM_RESPONSE_TO_FATTY_ACID	GO_BP_MM_RESPONSE_TO_FATTY_ACID	1/101	14/17799	0.0766049	0.228665	0.186314	HMGCS2	1
GO_BP_MM_SULFATE_TRANSPORT	GO_BP_MM_SULFATE_TRANSPORT	1/101	14/17799	0.0766049	0.228665	0.186314	RACGAP1	1
GO_MF_MM_CORE_PROMOTER_PROXIMAL_REGION_SEQUENCE-SPECIFIC_DNA_BINDING	GO_MF_MM_CORE_PROMOTER_PROXIMAL_REGION_SEQUENCE-SPECIFIC_DNA_BINDING	1/101	14/17799	0.0766049	0.228665	0.186314	UHRF1	1
GO_MF_MM_CYCLIN_BINDING	GO_MF_MM_CYCLIN_BINDING	1/101	14/17799	0.0766049	0.228665	0.186314	CDK1	1
GO_MF_MM_HSP70_PROTEIN_BINDING	GO_MF_MM_HSP70_PROTEIN_BINDING	1/101	14/17799	0.0766049	0.228665	0.186314	CDK1	1
GO_BP_MM_DNA_METHYLATION	GO_BP_MM_DNA_METHYLATION	1/101	15/17799	0.0818488	0.228665	0.186314	HELLS	1
GO_BP_MM_NEUROBLAST_PROLIFERATION	GO_BP_MM_NEUROBLAST_PROLIFERATION	1/101	15/17799	0.0818488	0.228665	0.186314	RACGAP1	1
GO_BP_MM_OOCYTE_MATURATION	GO_BP_MM_OOCYTE_MATURATION	1/101	15/17799	0.0818488	0.228665	0.186314	TRIP13	1
GO_BP_MM_POSITIVE_REGULATION_OF_CARDIAC_MUSCLE_CELL_PROLIFERATION	GO_BP_MM_POSITIVE_REGULATION_OF_CARDIAC_MUSCLE_CELL_PROLIFERATION	1/101	15/17799	0.0818488	0.228665	0.186314	CDK1	1
GO_BP_MM_POSITIVE_REGULATION_OF_CELL_CYCLE_ARREST	GO_BP_MM_POSITIVE_REGULATION_OF_CELL_CYCLE_ARREST	1/101	15/17799	0.0818488	0.228665	0.186314	BRCA1	1
GO_BP_MM_POSITIVE_REGULATION_OF_PROTEOLYSIS	GO_BP_MM_POSITIVE_REGULATION_OF_PROTEOLYSIS	1/101	15/17799	0.0818488	0.228665	0.186314	PLK1	1
GO_BP_MM_RESPONSE_TO_FOOD	GO_BP_MM_RESPONSE_TO_FOOD	1/101	15/17799	0.0818488	0.228665	0.186314	SOCS3	1
GO_BP_MM_RESPONSE_TO_METAL_ION	GO_BP_MM_RESPONSE_TO_METAL_ION	1/101	15/17799	0.0818488	0.228665	0.186314	HMGCS2	1
GO_BP_MM_TRIGLYCERIDE_HOMEOSTASIS	GO_BP_MM_TRIGLYCERIDE_HOMEOSTASIS	1/101	15/17799	0.0818488	0.228665	0.186314	ANGPTL4	1
GO_BP_MM_UROGENITAL_SYSTEM_DEVELOPMENT	GO_BP_MM_UROGENITAL_SYSTEM_DEVELOPMENT	1/101	15/17799	0.0818488	0.228665	0.186314	HELLS	1
GO_CC_MM_NUCLEAR_CHROMOSOME	GO_CC_MM_NUCLEAR_CHROMOSOME	1/101	15/17799	0.0818488	0.228665	0.186314	TOP2A	1
GO_MF_MM_ALPHA-TUBULIN_BINDING	GO_MF_MM_ALPHA-TUBULIN_BINDING	1/101	15/17799	0.0818488	0.228665	0.186314	RACGAP1	1
GO_MF_MM_RNA_POLYMERASE_II_CARBOXY-TERMINAL_DOMAIN_KINASE_ACTIVITY	GO_MF_MM_RNA_POLYMERASE_II_CARBOXY-TERMINAL_DOMAIN_KINASE_ACTIVITY	1/101	15/17799	0.0818488	0.228665	0.186314	CDK1	1
GO_BP_MM_ISOPRENOID_BIOSYNTHETIC_PROCESS	GO_BP_MM_ISOPRENOID_BIOSYNTHETIC_PROCESS	1/101	16/17799	0.0870633	0.233038	0.189876	HMGCS2	1
GO_BP_MM_POSITIVE_REGULATION_OF_COLLAGEN_BIOSYNTHETIC_PROCESS	GO_BP_MM_POSITIVE_REGULATION_OF_COLLAGEN_BIOSYNTHETIC_PROCESS	1/101	16/17799	0.0870633	0.233038	0.189876	SERPINF2	1
GO_BP_MM_PROTEIN_DESTABILIZATION	GO_BP_MM_PROTEIN_DESTABILIZATION	1/101	16/17799	0.0870633	0.233038	0.189876	PLK1	1
GO_BP_MM_REGULATION_OF_PROTEIN_KINASE_ACTIVITY	GO_BP_MM_REGULATION_OF_PROTEIN_KINASE_ACTIVITY	1/101	16/17799	0.0870633	0.233038	0.189876	ECT2	1
GO_BP_MM_RETINAL_GANGLION_CELL_AXON_GUIDANCE	GO_BP_MM_RETINAL_GANGLION_CELL_AXON_GUIDANCE	1/101	16/17799	0.0870633	0.233038	0.189876	SLIT2	1
GO_MF_MM_GAMMA-TUBULIN_BINDING	GO_MF_MM_GAMMA-TUBULIN_BINDING	1/101	16/17799	0.0870633	0.233038	0.189876	RACGAP1	1
GO_MF_MM_TRIGLYCERIDE_LIPASE_ACTIVITY	GO_MF_MM_TRIGLYCERIDE_LIPASE_ACTIVITY	1/101	16/17799	0.0870633	0.233038	0.189876	MGLL	1
GO_BP_MM_AXONOGENESIS	GO_BP_MM_AXONOGENESIS	2/101	89/17799	0.0909178	0.236509	0.192705	CCKAR/SLIT2	2
GO_BP_MM_NEGATIVE_REGULATION_OF_CYCLIN-DEPENDENT_PROTEIN_KINASE_ACTIVITY	GO_BP_MM_NEGATIVE_REGULATION_OF_CYCLIN-DEPENDENT_PROTEIN_KINASE_ACTIVITY	1/101	17/17799	0.0922484	0.236509	0.192705	PLK1	1
GO_BP_MM_T_CELL_HOMEOSTASIS	GO_BP_MM_T_CELL_HOMEOSTASIS	1/101	17/17799	0.0922484	0.236509	0.192705	CCNB2	1
GO_BP_MM_CELLULAR_RESPONSE_TO_GLUCOCORTICOID_STIMULUS	GO_BP_MM_CELLULAR_RESPONSE_TO_GLUCOCORTICOID_STIMULUS	1/101	18/17799	0.0974043	0.236509	0.192705	HMGCS2	1
GO_BP_MM_CELLULAR_RESPONSE_TO_INTERFERON-BETA	GO_BP_MM_CELLULAR_RESPONSE_TO_INTERFERON-BETA	1/101	18/17799	0.0974043	0.236509	0.192705	GBP3	1
GO_BP_MM_CENTROSOME_ORGANIZATION	GO_BP_MM_CENTROSOME_ORGANIZATION	1/101	18/17799	0.0974043	0.236509	0.192705	PLK1	1
GO_BP_MM_DNA_DAMAGE_RESPONSE_SIGNAL_TRANSDUCTION_RESULTING_IN_INDUCTION_OF_APOPTOSIS	GO_BP_MM_DNA_DAMAGE_RESPONSE_SIGNAL_TRANSDUCTION_RESULTING_IN_INDUCTION_OF_APOPTOSIS	1/101	18/17799	0.0974043	0.236509	0.192705	BRCA1	1
GO_BP_MM_EXTRACELLULAR_POLYSACCHARIDE_BIOSYNTHETIC_PROCESS	GO_BP_MM_EXTRACELLULAR_POLYSACCHARIDE_BIOSYNTHETIC_PROCESS	1/101	18/17799	0.0974043	0.236509	0.192705	TDH	1
GO_BP_MM_OLFACTORY_BULB_DEVELOPMENT	GO_BP_MM_OLFACTORY_BULB_DEVELOPMENT	1/101	18/17799	0.0974043	0.236509	0.192705	SLIT2	1
GO_BP_MM_POSITIVE_REGULATION_OF_CALCIUM-MEDIATED_SIGNALING	GO_BP_MM_POSITIVE_REGULATION_OF_CALCIUM-MEDIATED_SIGNALING	1/101	18/17799	0.0974043	0.236509	0.192705	NCAM1	1
GO_BP_MM_POSITIVE_REGULATION_OF_CELL_DEATH	GO_BP_MM_POSITIVE_REGULATION_OF_CELL_DEATH	1/101	18/17799	0.0974043	0.236509	0.192705	MYCN	1
GO_BP_MM_RESPONSE_TO_COPPER_ION	GO_BP_MM_RESPONSE_TO_COPPER_ION	1/101	18/17799	0.0974043	0.236509	0.192705	CDK1	1
GO_CC_MM_MALE_GERM_CELL_NUCLEUS	GO_CC_MM_MALE_GERM_CELL_NUCLEUS	1/101	18/17799	0.0974043	0.236509	0.192705	TRIP13	1
GO_MF_MM_DTDP-4-DEHYDRORHAMNOSE_REDUCTASE_ACTIVITY	GO_MF_MM_DTDP-4-DEHYDRORHAMNOSE_REDUCTASE_ACTIVITY	1/101	18/17799	0.0974043	0.236509	0.192705	TDH	1
GO_MF_MM_ENDOPEPTIDASE_INHIBITOR_ACTIVITY	GO_MF_MM_ENDOPEPTIDASE_INHIBITOR_ACTIVITY	1/101	18/17799	0.0974043	0.236509	0.192705	MUG1	1
GO_MF_MM_PROTEIN_SERINE_THREONINE_TYROSINE_KINASE_ACTIVITY	GO_MF_MM_PROTEIN_SERINE_THREONINE_TYROSINE_KINASE_ACTIVITY	1/101	18/17799	0.0974043	0.236509	0.192705	TTK	1
GO_BP_MM_NEURON_MIGRATION	GO_BP_MM_NEURON_MIGRATION	2/101	95/17799	0.101468	0.236509	0.192705	CCKAR/ASPM	2
GO_BP_MM_ADIPOSE_TISSUE_DEVELOPMENT	GO_BP_MM_ADIPOSE_TISSUE_DEVELOPMENT	1/101	19/17799	0.102531	0.236509	0.192705	HMGCS2	1
GO_BP_MM_CARTILAGE_CONDENSATION	GO_BP_MM_CARTILAGE_CONDENSATION	1/101	19/17799	0.102531	0.236509	0.192705	MYCN	1
GO_BP_MM_CELLULAR_RESPONSE_TO_IONIZING_RADIATION	GO_BP_MM_CELLULAR_RESPONSE_TO_IONIZING_RADIATION	1/101	19/17799	0.102531	0.236509	0.192705	ECT2	1
GO_BP_MM_PROTEIN_MONOUBIQUITINATION	GO_BP_MM_PROTEIN_MONOUBIQUITINATION	1/101	19/17799	0.102531	0.236509	0.192705	DTL	1
GO_BP_MM_REGULATION_OF_SENSORY_PERCEPTION_OF_PAIN	GO_BP_MM_REGULATION_OF_SENSORY_PERCEPTION_OF_PAIN	1/101	19/17799	0.102531	0.236509	0.192705	MGLL	1
GO_BP_MM_RESPONSE_TO_INTERFERON-GAMMA	GO_BP_MM_RESPONSE_TO_INTERFERON-GAMMA	1/101	19/17799	0.102531	0.236509	0.192705	H2-AA	1
GO_MF_MM_WW_DOMAIN_BINDING	GO_MF_MM_WW_DOMAIN_BINDING	1/101	19/17799	0.102531	0.236509	0.192705	CDC25C	1
GO_BP_MM_RESPONSE_TO_ORGANIC_SUBSTANCE	GO_BP_MM_RESPONSE_TO_ORGANIC_SUBSTANCE	2/101	96/17799	0.103259	0.236509	0.192705	BRCA1/SERPINF2	2
GO_MF_MM_HYDROLASE_ACTIVITY	GO_MF_MM_HYDROLASE_ACTIVITY	4/101	316/17799	0.105313	0.236509	0.192705	MGLL/FIGNL1/ACOT1/RAD54B	4
GO_BP_MM_RESPONSE_TO_ETHANOL	GO_BP_MM_RESPONSE_TO_ETHANOL	2/101	98/17799	0.106865	0.236509	0.192705	CDK1/HMGCS2	2
GO_CC_MM_CYTOPLASMIC_VESICLE	GO_CC_MM_CYTOPLASMIC_VESICLE	2/101	98/17799	0.106865	0.236509	0.192705	GBP3/GBP10	2
GO_BP_MM_POSITIVE_REGULATION_OF_NEUROBLAST_PROLIFERATION	GO_BP_MM_POSITIVE_REGULATION_OF_NEUROBLAST_PROLIFERATION	1/101	20/17799	0.107629	0.236509	0.192705	ASPM	1
GO_BP_MM_PROTON_TRANSPORT	GO_BP_MM_PROTON_TRANSPORT	1/101	20/17799	0.107629	0.236509	0.192705	SLC4A11	1
GO_MF_MM_3-BETA-HYDROXY-DELTA5-STEROID_DEHYDROGENASE_ACTIVITY	GO_MF_MM_3-BETA-HYDROXY-DELTA5-STEROID_DEHYDROGENASE_ACTIVITY	1/101	20/17799	0.107629	0.236509	0.192705	TDH	1
GO_MF_MM_BETA-TUBULIN_BINDING	GO_MF_MM_BETA-TUBULIN_BINDING	1/101	20/17799	0.107629	0.236509	0.192705	RACGAP1	1
GO_MF_MM_HYALURONIC_ACID_BINDING	GO_MF_MM_HYALURONIC_ACID_BINDING	1/101	20/17799	0.107629	0.236509	0.192705	HMMR	1
GO_BP_MM_RESPONSE_TO_ESTRADIOL_STIMULUS	GO_BP_MM_RESPONSE_TO_ESTRADIOL_STIMULUS	2/101	100/17799	0.110506	0.236509	0.192705	BRCA1/SOCS3	2
GO_CC_MM_CELL_CORTEX	GO_CC_MM_CELL_CORTEX	2/101	100/17799	0.110506	0.236509	0.192705	FGB/MELK	2
GO_BP_MM_RESPONSE_TO_DRUG	GO_BP_MM_RESPONSE_TO_DRUG	4/101	322/17799	0.1108	0.236509	0.192705	CDK1/TOP2A/HMGCS2/SOCS3	4
GO_BP_MM_ANION_TRANSPORT	GO_BP_MM_ANION_TRANSPORT	1/101	21/17799	0.112699	0.236509	0.192705	SLC4A11	1
GO_BP_MM_CELLULAR_RESPONSE_TO_HEAT	GO_BP_MM_CELLULAR_RESPONSE_TO_HEAT	1/101	21/17799	0.112699	0.236509	0.192705	MKI67	1
GO_BP_MM_JAK-STAT_CASCADE	GO_BP_MM_JAK-STAT_CASCADE	1/101	21/17799	0.112699	0.236509	0.192705	SOCS3	1
GO_BP_MM_MORPHOGENESIS_OF_AN_EPITHELIUM	GO_BP_MM_MORPHOGENESIS_OF_AN_EPITHELIUM	1/101	21/17799	0.112699	0.236509	0.192705	TIMELESS	1
GO_BP_MM_NEGATIVE_REGULATION_OF_INSULIN_RECEPTOR_SIGNALING_PATHWAY	GO_BP_MM_NEGATIVE_REGULATION_OF_INSULIN_RECEPTOR_SIGNALING_PATHWAY	1/101	21/17799	0.112699	0.236509	0.192705	SOCS3	1
GO_BP_MM_NEGATIVE_REGULATION_OF_SIGNAL_TRANSDUCTION	GO_BP_MM_NEGATIVE_REGULATION_OF_SIGNAL_TRANSDUCTION	1/101	21/17799	0.112699	0.236509	0.192705	SOCS3	1
GO_CC_MM_FILAMENTOUS_ACTIN	GO_CC_MM_FILAMENTOUS_ACTIN	1/101	21/17799	0.112699	0.236509	0.192705	BRCA1	1
GO_MF_MM_CARBOXYPEPTIDASE_ACTIVITY	GO_MF_MM_CARBOXYPEPTIDASE_ACTIVITY	1/101	21/17799	0.112699	0.236509	0.192705	ACE2	1
GO_MF_MM_ENZYME_INHIBITOR_ACTIVITY	GO_MF_MM_ENZYME_INHIBITOR_ACTIVITY	1/101	21/17799	0.112699	0.236509	0.192705	ANGPTL4	1
GO_MF_MM_G-PROTEIN_COUPLED_PURINERGIC_NUCLEOTIDE_RECEPTOR_ACTIVITY	GO_MF_MM_G-PROTEIN_COUPLED_PURINERGIC_NUCLEOTIDE_RECEPTOR_ACTIVITY	1/101	21/17799	0.112699	0.236509	0.192705	SUCNR1	1
GO_MF_MM_LIPID_BINDING	GO_MF_MM_LIPID_BINDING	2/101	102/17799	0.114179	0.238496	0.194323	MGLL/MELK	2
GO_BP_MM_MOTOR_AXON_GUIDANCE	GO_BP_MM_MOTOR_AXON_GUIDANCE	1/101	22/17799	0.11774	0.241715	0.196947	SLIT2	1
GO_BP_MM_NEGATIVE_REGULATION_OF_DNA_BINDING	GO_BP_MM_NEGATIVE_REGULATION_OF_DNA_BINDING	1/101	22/17799	0.11774	0.241715	0.196947	NEK2	1
GO_BP_MM_SYNAPSE_ORGANIZATION	GO_BP_MM_SYNAPSE_ORGANIZATION	1/101	22/17799	0.11774	0.241715	0.196947	LRRTM1	1
GO_MF_MM_PROTEIN_DIMERIZATION_ACTIVITY	GO_MF_MM_PROTEIN_DIMERIZATION_ACTIVITY	2/101	104/17799	0.117883	0.241715	0.196947	CREB3L3/SLC4A11	2
GO_BP_MM_HOMOPHILIC_CELL_ADHESION	GO_BP_MM_HOMOPHILIC_CELL_ADHESION	2/101	105/17799	0.119747	0.242789	0.197822	PCDHB21/PCDHB8	2
GO_CC_MM_EXTERNAL_SIDE_OF_PLASMA_MEMBRANE	GO_CC_MM_EXTERNAL_SIDE_OF_PLASMA_MEMBRANE	3/101	213/17799	0.120852	0.242789	0.197822	FGB/H2-AA/NCAM1	3
GO_CC_MM_CELL_SURFACE	GO_CC_MM_CELL_SURFACE	4/101	334/17799	0.122149	0.242789	0.197822	ACE2/HMMR/SLIT2/NCAM1	4
GO_BP_MM_POSITIVE_REGULATION_OF_DNA_REPAIR	GO_BP_MM_POSITIVE_REGULATION_OF_DNA_REPAIR	1/101	23/17799	0.122752	0.242789	0.197822	BRCA1	1
GO_BP_MM_POSITIVE_REGULATION_OF_STRESS_FIBER_ASSEMBLY	GO_BP_MM_POSITIVE_REGULATION_OF_STRESS_FIBER_ASSEMBLY	1/101	23/17799	0.122752	0.242789	0.197822	SERPINF2	1
GO_BP_MM_REGULATION_OF_MITOTIC_CELL_CYCLE	GO_BP_MM_REGULATION_OF_MITOTIC_CELL_CYCLE	1/101	23/17799	0.122752	0.242789	0.197822	PLK1	1
GO_BP_MM_RESPONSE_TO_CADMIUM_ION	GO_BP_MM_RESPONSE_TO_CADMIUM_ION	1/101	23/17799	0.122752	0.242789	0.197822	CDK1	1
GO_MF_MM_STEROID_BINDING	GO_MF_MM_STEROID_BINDING	1/101	23/17799	0.122752	0.242789	0.197822	SERPINA6	1
GO_CC_MM_NUCLEOPLASM	GO_CC_MM_NUCLEOPLASM	4/101	338/17799	0.12604	0.244638	0.199328	CDK1/TOP2A/DSCC1/RAD51	4
GO_BP_MM_IN_UTERO_EMBRYONIC_DEVELOPMENT	GO_BP_MM_IN_UTERO_EMBRYONIC_DEVELOPMENT	3/101	218/17799	0.1271	0.244638	0.199328	SLIT2/CCNB2/SERPINA1B	3
GO_BP_MM_BLOOD_VESSEL_MORPHOGENESIS	GO_BP_MM_BLOOD_VESSEL_MORPHOGENESIS	1/101	24/17799	0.127737	0.244638	0.199328	SERPINF2	1
GO_BP_MM_POSITIVE_REGULATION_OF_RHO_GTPASE_ACTIVITY	GO_BP_MM_POSITIVE_REGULATION_OF_RHO_GTPASE_ACTIVITY	1/101	24/17799	0.127737	0.244638	0.199328	ECT2	1
GO_BP_MM_SUBSTRATE_ADHESION-DEPENDENT_CELL_SPREADING	GO_BP_MM_SUBSTRATE_ADHESION-DEPENDENT_CELL_SPREADING	1/101	24/17799	0.127737	0.244638	0.199328	BRCA1	1
GO_CC_MM_HETEROCHROMATIN	GO_CC_MM_HETEROCHROMATIN	1/101	24/17799	0.127737	0.244638	0.199328	UHRF1	1
GO_BP_MM_ATP_METABOLIC_PROCESS	GO_BP_MM_ATP_METABOLIC_PROCESS	1/101	25/17799	0.132693	0.244638	0.199328	FIGNL1	1
GO_BP_MM_CELLULAR_RESPONSE_TO_CALCIUM_ION	GO_BP_MM_CELLULAR_RESPONSE_TO_CALCIUM_ION	1/101	25/17799	0.132693	0.244638	0.199328	ECT2	1
GO_BP_MM_CELLULAR_RESPONSE_TO_STARVATION	GO_BP_MM_CELLULAR_RESPONSE_TO_STARVATION	1/101	25/17799	0.132693	0.244638	0.199328	ANGPTL4	1
GO_BP_MM_CHOLESTEROL_BIOSYNTHETIC_PROCESS	GO_BP_MM_CHOLESTEROL_BIOSYNTHETIC_PROCESS	1/101	25/17799	0.132693	0.244638	0.199328	HMGCS2	1
GO_BP_MM_FEEDING_BEHAVIOR	GO_BP_MM_FEEDING_BEHAVIOR	1/101	25/17799	0.132693	0.244638	0.199328	CCKAR	1
GO_BP_MM_G2_M_TRANSITION_OF_MITOTIC_CELL_CYCLE	GO_BP_MM_G2_M_TRANSITION_OF_MITOTIC_CELL_CYCLE	1/101	25/17799	0.132693	0.244638	0.199328	PLK1	1
GO_BP_MM_PROTEIN_K11-LINKED_UBIQUITINATION	GO_BP_MM_PROTEIN_K11-LINKED_UBIQUITINATION	1/101	25/17799	0.132693	0.244638	0.199328	UBE2C	1
GO_BP_MM_REGULATION_OF_CELL_DIFFERENTIATION	GO_BP_MM_REGULATION_OF_CELL_DIFFERENTIATION	1/101	25/17799	0.132693	0.244638	0.199328	SOCS3	1
GO_BP_MM_REGULATION_OF_INFLAMMATORY_RESPONSE	GO_BP_MM_REGULATION_OF_INFLAMMATORY_RESPONSE	1/101	25/17799	0.132693	0.244638	0.199328	MGLL	1
GO_BP_MM_RESPONSE_TO_UNFOLDED_PROTEIN	GO_BP_MM_RESPONSE_TO_UNFOLDED_PROTEIN	1/101	25/17799	0.132693	0.244638	0.199328	CREB3L3	1
GO_BP_MM_EMBRYO_DEVELOPMENT	GO_BP_MM_EMBRYO_DEVELOPMENT	2/101	112/17799	0.132991	0.244638	0.199328	RACGAP1/TIMELESS	2
GO_CC_MM_FOCAL_ADHESION	GO_CC_MM_FOCAL_ADHESION	2/101	114/17799	0.136835	0.248051	0.202109	BRCA1/KIF22	2
GO_BP_MM_CELLULAR_RESPONSE_TO_UV	GO_BP_MM_CELLULAR_RESPONSE_TO_UV	1/101	26/17799	0.137621	0.248051	0.202109	AURKB	1
GO_BP_MM_POSITIVE_REGULATION_OF_MITOTIC_CELL_CYCLE	GO_BP_MM_POSITIVE_REGULATION_OF_MITOTIC_CELL_CYCLE	1/101	26/17799	0.137621	0.248051	0.202109	CDK1	1
GO_BP_MM_REGULATION_OF_SIGNAL_TRANSDUCTION	GO_BP_MM_REGULATION_OF_SIGNAL_TRANSDUCTION	1/101	26/17799	0.137621	0.248051	0.202109	MGLL	1
GO_MF_MM_FOUR-WAY_JUNCTION_HELICASE_ACTIVITY	GO_MF_MM_FOUR-WAY_JUNCTION_HELICASE_ACTIVITY	1/101	26/17799	0.137621	0.248051	0.202109	FIGNL1	1
GO_BP_MM_CELL_AGING	GO_BP_MM_CELL_AGING	1/101	27/17799	0.142522	0.254829	0.207632	CDK1	1
GO_BP_MM_PLATELET_ACTIVATION	GO_BP_MM_PLATELET_ACTIVATION	1/101	27/17799	0.142522	0.254829	0.207632	FGB	1
GO_BP_MM_PEPTIDYL-THREONINE_PHOSPHORYLATION	GO_BP_MM_PEPTIDYL-THREONINE_PHOSPHORYLATION	1/101	28/17799	0.147395	0.258375	0.210521	PBK	1
GO_BP_MM_RESPONSE_TO_PROGESTERONE_STIMULUS	GO_BP_MM_RESPONSE_TO_PROGESTERONE_STIMULUS	1/101	28/17799	0.147395	0.258375	0.210521	SOCS3	1
GO_BP_MM_RESPONSE_TO_RADIATION	GO_BP_MM_RESPONSE_TO_RADIATION	1/101	28/17799	0.147395	0.258375	0.210521	CCKAR	1
GO_CC_MM_LATERAL_PLASMA_MEMBRANE	GO_CC_MM_LATERAL_PLASMA_MEMBRANE	1/101	28/17799	0.147395	0.258375	0.210521	ABCC6	1
GO_MF_MM_RHO_GTPASE_BINDING	GO_MF_MM_RHO_GTPASE_BINDING	1/101	28/17799	0.147395	0.258375	0.210521	ECT2	1
GO_BP_MM_PROTEIN_POLYMERIZATION	GO_BP_MM_PROTEIN_POLYMERIZATION	1/101	29/17799	0.152241	0.263103	0.214373	FGB	1
GO_BP_MM_RESPONSE_TO_TESTOSTERONE_STIMULUS	GO_BP_MM_RESPONSE_TO_TESTOSTERONE_STIMULUS	1/101	29/17799	0.152241	0.263103	0.214373	HMGCS2	1
GO_CC_MM_CYTOPLASMIC_MICROTUBULE	GO_CC_MM_CYTOPLASMIC_MICROTUBULE	1/101	29/17799	0.152241	0.263103	0.214373	KIF2C	1
GO_MF_MM_GTPASE_ACTIVATOR_ACTIVITY	GO_MF_MM_GTPASE_ACTIVATOR_ACTIVITY	2/101	122/17799	0.152447	0.263103	0.214373	RACGAP1/ECT2	2
GO_MF_MM_GTP_BINDING	GO_MF_MM_GTP_BINDING	4/101	367/17799	0.155756	0.26778	0.218184	GBP3/GM4841/GIMAP1/GBP10	4
GO_BP_MM_NUCLEOSOME_ASSEMBLY	GO_BP_MM_NUCLEOSOME_ASSEMBLY	2/101	124/17799	0.156404	0.267863	0.218252	ASF1B/CENPA	2
GO_BP_MM_PROTEIN_AUTOUBIQUITINATION	GO_BP_MM_PROTEIN_AUTOUBIQUITINATION	1/101	31/17799	0.161851	0.274043	0.223287	BRCA1	1
GO_BP_MM_RESPONSE_TO_AXON_INJURY	GO_BP_MM_RESPONSE_TO_AXON_INJURY	1/101	31/17799	0.161851	0.274043	0.223287	CDK1	1
GO_BP_MM_T_CELL_DIFFERENTIATION	GO_BP_MM_T_CELL_DIFFERENTIATION	1/101	31/17799	0.161851	0.274043	0.223287	GIMAP1	1
GO_BP_MM_INSULIN_SECRETION	GO_BP_MM_INSULIN_SECRETION	1/101	32/17799	0.166615	0.27584	0.224752	CCKAR	1
GO_BP_MM_POSITIVE_REGULATION_OF_PROTEASOMAL_UBIQUITIN-DEPENDENT_PROTEIN_CATABOLIC_PROCESS	GO_BP_MM_POSITIVE_REGULATION_OF_PROTEASOMAL_UBIQUITIN-DEPENDENT_PROTEIN_CATABOLIC_PROCESS	1/101	32/17799	0.166615	0.27584	0.224752	PLK1	1
GO_BP_MM_RAS_PROTEIN_SIGNAL_TRANSDUCTION	GO_BP_MM_RAS_PROTEIN_SIGNAL_TRANSDUCTION	1/101	32/17799	0.166615	0.27584	0.224752	CCNA2	1
GO_BP_MM_RESPONSE_TO_ACTIVITY	GO_BP_MM_RESPONSE_TO_ACTIVITY	1/101	32/17799	0.166615	0.27584	0.224752	CDK1	1
GO_MF_MM_CYCLIN-DEPENDENT_PROTEIN_KINASE_ACTIVITY	GO_MF_MM_CYCLIN-DEPENDENT_PROTEIN_KINASE_ACTIVITY	1/101	32/17799	0.166615	0.27584	0.224752	CDK1	1
GO_MF_MM_UBIQUITIN_BINDING	GO_MF_MM_UBIQUITIN_BINDING	1/101	32/17799	0.166615	0.27584	0.224752	TOP2A	1
GO_BP_MM_ANTI-APOPTOSIS	GO_BP_MM_ANTI-APOPTOSIS	2/101	130/17799	0.168389	0.277748	0.226306	CDK1/HELLS	2
GO_BP_MM_BEHAVIOR	GO_BP_MM_BEHAVIOR	1/101	33/17799	0.171353	0.278526	0.22694	LRRTM1	1
GO_BP_MM_CELLULAR_RESPONSE_TO_AMINO_ACID_STIMULUS	GO_BP_MM_CELLULAR_RESPONSE_TO_AMINO_ACID_STIMULUS	1/101	33/17799	0.171353	0.278526	0.22694	HMGCS2	1
GO_BP_MM_REGULATION_OF_PROTEIN_PHOSPHORYLATION	GO_BP_MM_REGULATION_OF_PROTEIN_PHOSPHORYLATION	1/101	33/17799	0.171353	0.278526	0.22694	SOCS3	1
GO_MF_MM_SH2_DOMAIN_BINDING	GO_MF_MM_SH2_DOMAIN_BINDING	1/101	33/17799	0.171353	0.278526	0.22694	SHCBP1	1
GO_BP_MM_UBIQUITIN-DEPENDENT_PROTEIN_CATABOLIC_PROCESS	GO_BP_MM_UBIQUITIN-DEPENDENT_PROTEIN_CATABOLIC_PROCESS	2/101	133/17799	0.17444	0.279045	0.227363	UBE2C/DTL	2
GO_BP_MM_ACTIN_CYTOSKELETON_REORGANIZATION	GO_BP_MM_ACTIN_CYTOSKELETON_REORGANIZATION	1/101	34/17799	0.176063	0.279045	0.227363	CCKAR	1
GO_BP_MM_COLLAGEN_FIBRIL_ORGANIZATION	GO_BP_MM_COLLAGEN_FIBRIL_ORGANIZATION	1/101	34/17799	0.176063	0.279045	0.227363	SERPINF2	1
GO_BP_MM_POSITIVE_REGULATION_OF_MESENCHYMAL_CELL_PROLIFERATION	GO_BP_MM_POSITIVE_REGULATION_OF_MESENCHYMAL_CELL_PROLIFERATION	1/101	34/17799	0.176063	0.279045	0.227363	MYCN	1
GO_BP_MM_THYMUS_DEVELOPMENT	GO_BP_MM_THYMUS_DEVELOPMENT	1/101	34/17799	0.176063	0.279045	0.227363	CCNB2	1
GO_MF_MM_GTPASE_ACTIVITY	GO_MF_MM_GTPASE_ACTIVITY	3/101	256/17799	0.177984	0.279045	0.227363	GBP3/GM4841/GBP10	3
GO_CC_MM_INTRACELLULAR_MEMBRANE-BOUNDED_ORGANELLE	GO_CC_MM_INTRACELLULAR_MEMBRANE-BOUNDED_ORGANELLE	3/101	257/17799	0.179393	0.279045	0.227363	POLE2/MCM3/RNF182	3
GO_BP_MM_PANCREAS_DEVELOPMENT	GO_BP_MM_PANCREAS_DEVELOPMENT	1/101	35/17799	0.180748	0.279045	0.227363	CCKAR	1
GO_BP_MM_RESPONSE_TO_ANTIBIOTIC	GO_BP_MM_RESPONSE_TO_ANTIBIOTIC	1/101	35/17799	0.180748	0.279045	0.227363	PLK1	1
GO_BP_MM_RESPONSE_TO_GAMMA_RADIATION	GO_BP_MM_RESPONSE_TO_GAMMA_RADIATION	1/101	35/17799	0.180748	0.279045	0.227363	SOCS3	1
GO_BP_MM_RESPONSE_TO_STEROID_HORMONE_STIMULUS	GO_BP_MM_RESPONSE_TO_STEROID_HORMONE_STIMULUS	1/101	35/17799	0.180748	0.279045	0.227363	CCKAR	1
GO_BP_MM_RESPONSE_TO_UV	GO_BP_MM_RESPONSE_TO_UV	1/101	35/17799	0.180748	0.279045	0.227363	DTL	1
GO_MF_MM_METHYLATED_HISTONE_RESIDUE_BINDING	GO_MF_MM_METHYLATED_HISTONE_RESIDUE_BINDING	1/101	35/17799	0.180748	0.279045	0.227363	UHRF1	1
GO_MF_MM_PROTEIN_BINDING_BRIDGING	GO_MF_MM_PROTEIN_BINDING_BRIDGING	1/101	35/17799	0.180748	0.279045	0.227363	FGB	1
GO_BP_MM_PROTEIN_AUTOPHOSPHORYLATION	GO_BP_MM_PROTEIN_AUTOPHOSPHORYLATION	2/101	137/17799	0.182563	0.279045	0.227363	NEK2/MELK	2
GO_BP_MM_SPERMATOGENESIS	GO_BP_MM_SPERMATOGENESIS	3/101	260/17799	0.18364	0.279045	0.227363	TRIP13/RACGAP1/ASPM	3
GO_BP_MM_B_CELL_DIFFERENTIATION	GO_BP_MM_B_CELL_DIFFERENTIATION	1/101	36/17799	0.185406	0.279045	0.227363	GIMAP1	1
GO_BP_MM_NEGATIVE_REGULATION_OF_PROTEIN_PHOSPHORYLATION	GO_BP_MM_NEGATIVE_REGULATION_OF_PROTEIN_PHOSPHORYLATION	1/101	36/17799	0.185406	0.279045	0.227363	SLIT2	1
GO_BP_MM_NEURON_PROJECTION_MORPHOGENESIS	GO_BP_MM_NEURON_PROJECTION_MORPHOGENESIS	1/101	36/17799	0.185406	0.279045	0.227363	SLIT2	1
GO_BP_MM_POSITIVE_REGULATION_OF_DNA_REPLICATION	GO_BP_MM_POSITIVE_REGULATION_OF_DNA_REPLICATION	1/101	36/17799	0.185406	0.279045	0.227363	CDK1	1
GO_BP_MM_PROTEIN_K48-LINKED_UBIQUITINATION	GO_BP_MM_PROTEIN_K48-LINKED_UBIQUITINATION	1/101	36/17799	0.185406	0.279045	0.227363	UBE2C	1
GO_MF_MM_ATPASE_ACTIVITY_COUPLED_TO_TRANSMEMBRANE_MOVEMENT_OF_IONS_PHOSPHORYLATIVE_MECHANISM	GO_MF_MM_ATPASE_ACTIVITY_COUPLED_TO_TRANSMEMBRANE_MOVEMENT_OF_IONS_PHOSPHORYLATIVE_MECHANISM	1/101	36/17799	0.185406	0.279045	0.227363	ATP13A4	1
GO_BP_MM_INTRACELLULAR_SIGNAL_TRANSDUCTION	GO_BP_MM_INTRACELLULAR_SIGNAL_TRANSDUCTION	3/101	264/17799	0.189345	0.284017	0.231414	RACGAP1/ECT2/SOCS3	3
GO_BP_MM_GROWTH	GO_BP_MM_GROWTH	1/101	37/17799	0.190038	0.284103	0.231484	CCNB2	1
GO_BP_MM_CELLULAR_RESPONSE_TO_ORGANIC_CYCLIC_COMPOUND	GO_BP_MM_CELLULAR_RESPONSE_TO_ORGANIC_CYCLIC_COMPOUND	1/101	38/17799	0.194643	0.288098	0.234739	HMGCS2	1
GO_BP_MM_METANEPHROS_DEVELOPMENT	GO_BP_MM_METANEPHROS_DEVELOPMENT	1/101	38/17799	0.194643	0.288098	0.234739	SLIT2	1
GO_BP_MM_STEROID_BIOSYNTHETIC_PROCESS	GO_BP_MM_STEROID_BIOSYNTHETIC_PROCESS	1/101	38/17799	0.194643	0.288098	0.234739	TDH	1
GO_CC_MM_ACTIN_CYTOSKELETON	GO_CC_MM_ACTIN_CYTOSKELETON	2/101	145/17799	0.198968	0.290074	0.236349	NCAPG/ANLN	2
GO_BP_MM_POSITIVE_REGULATION_OF_PROTEIN_UBIQUITINATION	GO_BP_MM_POSITIVE_REGULATION_OF_PROTEIN_UBIQUITINATION	1/101	39/17799	0.199223	0.290074	0.236349	BRCA1	1
GO_CC_MM_TERMINAL_BUTTON	GO_CC_MM_TERMINAL_BUTTON	1/101	39/17799	0.199223	0.290074	0.236349	CCKAR	1
GO_MF_MM_ATPASE_ACTIVITY_COUPLED_TO_TRANSMEMBRANE_MOVEMENT_OF_SUBSTANCES	GO_MF_MM_ATPASE_ACTIVITY_COUPLED_TO_TRANSMEMBRANE_MOVEMENT_OF_SUBSTANCES	1/101	39/17799	0.199223	0.290074	0.236349	ABCC6	1
GO_MF_MM_PROTEIN_KINASE_C_BINDING	GO_MF_MM_PROTEIN_KINASE_C_BINDING	1/101	39/17799	0.199223	0.290074	0.236349	TOP2A	1
GO_MF_MM_RECEPTOR_BINDING	GO_MF_MM_RECEPTOR_BINDING	3/101	272/17799	0.200889	0.291551	0.237552	ANGPTL4/SLIT2/FGB	3
GO_BP_MM_POSITIVE_REGULATION_OF_SMOOTH_MUSCLE_CELL_PROLIFERATION	GO_BP_MM_POSITIVE_REGULATION_OF_SMOOTH_MUSCLE_CELL_PROLIFERATION	1/101	40/17799	0.203777	0.293833	0.239412	SERPINF2	1
GO_MF_MM_GLYCOPROTEIN_BINDING	GO_MF_MM_GLYCOPROTEIN_BINDING	1/101	40/17799	0.203777	0.293833	0.239412	ACE2	1
GO_MF_MM_ATPASE_ACTIVITY	GO_MF_MM_ATPASE_ACTIVITY	2/101	148/17799	0.205167	0.294886	0.24027	ABCC6/ATP13A4	2
GO_BP_MM_ADULT_LOCOMOTORY_BEHAVIOR	GO_BP_MM_ADULT_LOCOMOTORY_BEHAVIOR	1/101	41/17799	0.208305	0.297484	0.242387	DMBX1	1
GO_MF_MM_CHAPERONE_BINDING	GO_MF_MM_CHAPERONE_BINDING	1/101	41/17799	0.208305	0.297484	0.242387	FGB	1
GO_BP_MM_NEGATIVE_REGULATION_OF_TRANSCRIPTION_DNA-DEPENDENT	GO_BP_MM_NEGATIVE_REGULATION_OF_TRANSCRIPTION_DNA-DEPENDENT	4/101	416/17799	0.211101	0.300516	0.244857	BRCA1/CENPF/DMBX1/TIMELESS	4
GO_BP_MM_RESPONSE_TO_ORGANIC_NITROGEN	GO_BP_MM_RESPONSE_TO_ORGANIC_NITROGEN	1/101	42/17799	0.212808	0.301985	0.246054	CDK1	1
GO_MF_MM_NON-MEMBRANE_SPANNING_PROTEIN_TYROSINE_KINASE_ACTIVITY	GO_MF_MM_NON-MEMBRANE_SPANNING_PROTEIN_TYROSINE_KINASE_ACTIVITY	1/101	43/17799	0.217286	0.307363	0.250436	MELK	1
GO_BP_MM_RESPONSE_TO_HYDROGEN_PEROXIDE	GO_BP_MM_RESPONSE_TO_HYDROGEN_PEROXIDE	1/101	44/17799	0.221738	0.311688	0.25396	CDK1	1
GO_MF_MM_HYDROLASE_ACTIVITY_ACTING_ON_ACID_ANHYDRIDES_CATALYZING_TRANSMEMBRANE_MOVEMENT_OF_SUBSTANCES	GO_MF_MM_HYDROLASE_ACTIVITY_ACTING_ON_ACID_ANHYDRIDES_CATALYZING_TRANSMEMBRANE_MOVEMENT_OF_SUBSTANCES	1/101	44/17799	0.221738	0.311688	0.25396	ATP13A4	1
GO_MF_MM_PROTEIN_HETERODIMERIZATION_ACTIVITY	GO_MF_MM_PROTEIN_HETERODIMERIZATION_ACTIVITY	3/101	287/17799	0.222966	0.312432	0.254566	TOP2A/DMBX1/TIMELESS	3
GO_BP_MM_POSITIVE_REGULATION_OF_PROTEIN_KINASE_ACTIVITY	GO_BP_MM_POSITIVE_REGULATION_OF_PROTEIN_KINASE_ACTIVITY	1/101	45/17799	0.226165	0.31299	0.255021	CENPE	1
GO_BP_MM_RESPONSE_TO_IONIZING_RADIATION	GO_BP_MM_RESPONSE_TO_IONIZING_RADIATION	1/101	45/17799	0.226165	0.31299	0.255021	BRCA1	1
GO_BP_MM_URETERIC_BUD_DEVELOPMENT	GO_BP_MM_URETERIC_BUD_DEVELOPMENT	1/101	45/17799	0.226165	0.31299	0.255021	SLIT2	1
GO_MF_MM_COENZYME_BINDING	GO_MF_MM_COENZYME_BINDING	1/101	45/17799	0.226165	0.31299	0.255021	TDH	1
GO_BP_MM_EMBRYONIC_DIGIT_MORPHOGENESIS	GO_BP_MM_EMBRYONIC_DIGIT_MORPHOGENESIS	1/101	46/17799	0.230567	0.316146	0.257592	MYCN	1
GO_BP_MM_POSITIVE_REGULATION_OF_CANONICAL_WNT_RECEPTOR_SIGNALING_PATHWAY	GO_BP_MM_POSITIVE_REGULATION_OF_CANONICAL_WNT_RECEPTOR_SIGNALING_PATHWAY	1/101	46/17799	0.230567	0.316146	0.257592	ASPM	1
GO_BP_MM_POSITIVE_REGULATION_OF_JNK_CASCADE	GO_BP_MM_POSITIVE_REGULATION_OF_JNK_CASCADE	1/101	46/17799	0.230567	0.316146	0.257592	SERPINF2	1
GO_BP_MM_RESPONSE_TO_LIPOPOLYSACCHARIDE	GO_BP_MM_RESPONSE_TO_LIPOPOLYSACCHARIDE	2/101	161/17799	0.232246	0.317474	0.258674	CCKAR/SOCS3	2
GO_CC_MM_PROTEIN_COMPLEX	GO_CC_MM_PROTEIN_COMPLEX	3/101	295/17799	0.234937	0.318243	0.259301	CDC20/TOP2A/NEK2	3
GO_BP_MM_CELLULAR_METABOLIC_PROCESS	GO_BP_MM_CELLULAR_METABOLIC_PROCESS	1/101	47/17799	0.234945	0.318243	0.259301	TDH	1
GO_BP_MM_CIRCADIAN_RHYTHM	GO_BP_MM_CIRCADIAN_RHYTHM	1/101	47/17799	0.234945	0.318243	0.259301	TIMELESS	1
GO_BP_MM_G1_S_TRANSITION_OF_MITOTIC_CELL_CYCLE	GO_BP_MM_G1_S_TRANSITION_OF_MITOTIC_CELL_CYCLE	1/101	48/17799	0.239297	0.322187	0.262514	CDCA5	1
GO_MF_MM_SINGLE-STRANDED_DNA_BINDING	GO_MF_MM_SINGLE-STRANDED_DNA_BINDING	1/101	48/17799	0.239297	0.322187	0.262514	RAD51	1
GO_MF_MM_PROTEASE_BINDING	GO_MF_MM_PROTEASE_BINDING	1/101	49/17799	0.243626	0.327029	0.26646	SERPINF2	1
GO_BP_MM_FATTY_ACID_BIOSYNTHETIC_PROCESS	GO_BP_MM_FATTY_ACID_BIOSYNTHETIC_PROCESS	1/101	50/17799	0.24793	0.329835	0.268746	MGLL	1
GO_BP_MM_PROTEIN_COMPLEX_ASSEMBLY	GO_BP_MM_PROTEIN_COMPLEX_ASSEMBLY	1/101	50/17799	0.24793	0.329835	0.268746	CDK1	1
GO_MF_MM_PROTEIN_PHOSPHATASE_BINDING	GO_MF_MM_PROTEIN_PHOSPHATASE_BINDING	1/101	50/17799	0.24793	0.329835	0.268746	NEK2	1
GO_BP_MM_OSTEOBLAST_DIFFERENTIATION	GO_BP_MM_OSTEOBLAST_DIFFERENTIATION	1/101	51/17799	0.252209	0.333543	0.271767	FIGNL1	1
GO_BP_MM_PROTEIN_POLYUBIQUITINATION	GO_BP_MM_PROTEIN_POLYUBIQUITINATION	1/101	51/17799	0.252209	0.333543	0.271767	DTL	1
GO_BP_MM_EMBRYONIC_SKELETAL_SYSTEM_MORPHOGENESIS	GO_BP_MM_EMBRYONIC_SKELETAL_SYSTEM_MORPHOGENESIS	1/101	52/17799	0.256465	0.337176	0.274727	MYCN	1
GO_BP_MM_REGULATION_OF_GROWTH	GO_BP_MM_REGULATION_OF_GROWTH	1/101	52/17799	0.256465	0.337176	0.274727	SOCS3	1
GO_CC_MM_LYSOSOME	GO_CC_MM_LYSOSOME	2/101	174/17799	0.25954	0.338754	0.276013	CCKAR/H2-AA	2
GO_BP_MM_POSITIVE_REGULATION_OF_GTPASE_ACTIVITY	GO_BP_MM_POSITIVE_REGULATION_OF_GTPASE_ACTIVITY	1/101	53/17799	0.260696	0.338754	0.276013	RACGAP1	1
GO_BP_MM_SPERMATID_DEVELOPMENT	GO_BP_MM_SPERMATID_DEVELOPMENT	1/101	53/17799	0.260696	0.338754	0.276013	TRIP13	1
GO_MF_MM_ENDOPEPTIDASE_ACTIVITY	GO_MF_MM_ENDOPEPTIDASE_ACTIVITY	1/101	53/17799	0.260696	0.338754	0.276013	ACE2	1
GO_MF_MM_OXIDOREDUCTASE_ACTIVITY_ACTING_ON_THE_CH-OH_GROUP_OF_DONORS_NAD_OR_NADP_AS_ACCEPTOR	GO_MF_MM_OXIDOREDUCTASE_ACTIVITY_ACTING_ON_THE_CH-OH_GROUP_OF_DONORS_NAD_OR_NADP_AS_ACCEPTOR	1/101	54/17799	0.264904	0.342779	0.279293	TDH	1
GO_BP_MM_NEGATIVE_REGULATION_OF_APOPTOTIC_PROCESS	GO_BP_MM_NEGATIVE_REGULATION_OF_APOPTOTIC_PROCESS	3/101	315/17799	0.265328	0.342779	0.279293	ANGPTL4/PLK1/FIGNL1	3
GO_MF_MM_IDENTICAL_PROTEIN_BINDING	GO_MF_MM_IDENTICAL_PROTEIN_BINDING	3/101	316/17799	0.266862	0.343767	0.280098	TRIP13/RAD51/PRC1	3
GO_BP_MM_LIPOPOLYSACCHARIDE_BIOSYNTHETIC_PROCESS	GO_BP_MM_LIPOPOLYSACCHARIDE_BIOSYNTHETIC_PROCESS	1/101	55/17799	0.269088	0.345639	0.281623	MELK	1
GO_CC_MM_AXON	GO_CC_MM_AXON	2/101	180/17799	0.272163	0.348587	0.284025	NCAM1/LRRTM1	2
GO_BP_MM_RESPONSE_TO_CAMP	GO_BP_MM_RESPONSE_TO_CAMP	1/101	56/17799	0.273248	0.348977	0.284343	HMGCS2	1
GO_BP_MM_NEGATIVE_REGULATION_OF_NEURON_DIFFERENTIATION	GO_BP_MM_NEGATIVE_REGULATION_OF_NEURON_DIFFERENTIATION	1/101	57/17799	0.277385	0.352291	0.287043	ASPM	1
GO_BP_MM_TRANSPORT	GO_BP_MM_TRANSPORT	4/101	470/17799	0.277419	0.352291	0.287043	ABCC6/SLC25A34/SERPINA6/SLC4A11	4
GO_BP_MM_ANTIGEN_PROCESSING_AND_PRESENTATION	GO_BP_MM_ANTIGEN_PROCESSING_AND_PRESENTATION	1/101	58/17799	0.281499	0.356459	0.290439	H2-AA	1
GO_BP_MM_RESPONSE_TO_CALCIUM_ION	GO_BP_MM_RESPONSE_TO_CALCIUM_ION	1/101	59/17799	0.285589	0.360617	0.293827	FGB	1
GO_BP_MM_RESPONSE_TO_HYPOXIA	GO_BP_MM_RESPONSE_TO_HYPOXIA	2/101	192/17799	0.297381	0.371738	0.302888	ANGPTL4/SOCS3	2
GO_BP_MM_CELLULAR_RESPONSE_TO_INSULIN_STIMULUS	GO_BP_MM_CELLULAR_RESPONSE_TO_INSULIN_STIMULUS	1/101	62/17799	0.297723	0.371738	0.302888	HMGCS2	1
GO_CC_MM_ACROSOMAL_VESICLE	GO_CC_MM_ACROSOMAL_VESICLE	1/101	62/17799	0.297723	0.371738	0.302888	RACGAP1	1
GO_CC_MM_CHROMOSOME	GO_CC_MM_CHROMOSOME	1/101	62/17799	0.297723	0.371738	0.302888	TOP2A	1
GO_MF_MM_ENZYME_BINDING	GO_MF_MM_ENZYME_BINDING	2/101	193/17799	0.299478	0.372888	0.303825	CDC20/TOP2A	2
GO_BP_MM_NEGATIVE_REGULATION_OF_CELL_MIGRATION	GO_BP_MM_NEGATIVE_REGULATION_OF_CELL_MIGRATION	1/101	63/17799	0.301722	0.3736	0.304405	SLIT2	1
GO_MF_MM_HISTONE_DEACETYLASE_BINDING	GO_MF_MM_HISTONE_DEACETYLASE_BINDING	1/101	63/17799	0.301722	0.3736	0.304405	TOP2A	1
GO_BP_MM_NEGATIVE_REGULATION_OF_TRANSCRIPTION_FROM_RNA_POLYMERASE_II_PROMOTER	GO_BP_MM_NEGATIVE_REGULATION_OF_TRANSCRIPTION_FROM_RNA_POLYMERASE_II_PROMOTER	4/101	492/17799	0.305427	0.377144	0.307292	AURKB/DMBX1/PLK1/TIMELESS	4
GO_BP_MM_CENTRAL_NERVOUS_SYSTEM_DEVELOPMENT	GO_BP_MM_CENTRAL_NERVOUS_SYSTEM_DEVELOPMENT	1/101	65/17799	0.309652	0.379218	0.308983	DMBX1	1
GO_BP_MM_HEMOPOIESIS	GO_BP_MM_HEMOPOIESIS	1/101	65/17799	0.309652	0.379218	0.308983	MELK	1
GO_CC_MM_PML_BODY	GO_CC_MM_PML_BODY	1/101	65/17799	0.309652	0.379218	0.308983	RAD51	1
GO_MF_MM_DRUG_BINDING	GO_MF_MM_DRUG_BINDING	1/101	66/17799	0.313584	0.38194	0.311201	TOP2A	1
GO_MF_MM_LIGASE_ACTIVITY	GO_MF_MM_LIGASE_ACTIVITY	1/101	66/17799	0.313584	0.38194	0.311201	UHRF1	1
GO_BP_MM_RESPONSE_TO_HORMONE_STIMULUS	GO_BP_MM_RESPONSE_TO_HORMONE_STIMULUS	1/101	67/17799	0.317494	0.385588	0.314173	SOCS3	1
GO_MF_MM_SIGNAL_TRANSDUCER_ACTIVITY	GO_MF_MM_SIGNAL_TRANSDUCER_ACTIVITY	2/101	202/17799	0.318304	0.385588	0.314173	HMMR/ECT2	2
GO_BP_MM_NEGATIVE_REGULATION_OF_GENE_EXPRESSION	GO_BP_MM_NEGATIVE_REGULATION_OF_GENE_EXPRESSION	1/101	68/17799	0.321381	0.387217	0.3155	SLIT2	1
GO_CC_MM_NUCLEAR_MATRIX	GO_CC_MM_NUCLEAR_MATRIX	1/101	68/17799	0.321381	0.387217	0.3155	CENPF	1
GO_BP_MM_ATP_CATABOLIC_PROCESS	GO_BP_MM_ATP_CATABOLIC_PROCESS	1/101	70/17799	0.32909	0.392276	0.319622	ABCC6	1
GO_BP_MM_CELL_MORPHOGENESIS	GO_BP_MM_CELL_MORPHOGENESIS	1/101	70/17799	0.32909	0.392276	0.319622	ECT2	1
GO_BP_MM_POSITIVE_REGULATION_OF_NEURON_DIFFERENTIATION	GO_BP_MM_POSITIVE_REGULATION_OF_NEURON_DIFFERENTIATION	1/101	70/17799	0.32909	0.392276	0.319622	ECT2	1
GO_CC_MM_RUFFLE	GO_CC_MM_RUFFLE	1/101	70/17799	0.32909	0.392276	0.319622	BRCA1	1
GO_BP_MM_REGULATION_OF_RHO_PROTEIN_SIGNAL_TRANSDUCTION	GO_BP_MM_REGULATION_OF_RHO_PROTEIN_SIGNAL_TRANSDUCTION	1/101	71/17799	0.332913	0.395776	0.322474	ECT2	1
GO_MF_MM_RHO_GUANYL-NUCLEOTIDE_EXCHANGE_FACTOR_ACTIVITY	GO_MF_MM_RHO_GUANYL-NUCLEOTIDE_EXCHANGE_FACTOR_ACTIVITY	1/101	73/17799	0.340492	0.403714	0.328941	ECT2	1
GO_BP_MM_INTRACELLULAR_PROTEIN_KINASE_CASCADE	GO_BP_MM_INTRACELLULAR_PROTEIN_KINASE_CASCADE	1/101	75/17799	0.347987	0.409342	0.333527	SOCS3	1
GO_BP_MM_NEURON_PROJECTION_DEVELOPMENT	GO_BP_MM_NEURON_PROJECTION_DEVELOPMENT	1/101	75/17799	0.347987	0.409342	0.333527	NCAM1	1
GO_BP_MM_RESPONSE_TO_TOXIN	GO_BP_MM_RESPONSE_TO_TOXIN	1/101	75/17799	0.347987	0.409342	0.333527	CDK1	1
GO_BP_MM_POSITIVE_REGULATION_OF_ERK1_AND_ERK2_CASCADE	GO_BP_MM_POSITIVE_REGULATION_OF_ERK1_AND_ERK2_CASCADE	1/101	76/17799	0.351702	0.412627	0.336204	SERPINF2	1
GO_BP_MM_DNA_RECOMBINATION	GO_BP_MM_DNA_RECOMBINATION	1/101	78/17799	0.35907	0.420169	0.342349	FIGNL1	1
GO_BP_MM_FOREBRAIN_DEVELOPMENT	GO_BP_MM_FOREBRAIN_DEVELOPMENT	1/101	79/17799	0.362723	0.423335	0.344928	CCKAR	1
GO_BP_MM_CELL-CELL_ADHESION	GO_BP_MM_CELL-CELL_ADHESION	1/101	80/17799	0.366355	0.426461	0.347475	SLIT2	1
GO_BP_MM_MULTICELLULAR_ORGANISMAL_DEVELOPMENT	GO_BP_MM_MULTICELLULAR_ORGANISMAL_DEVELOPMENT	3/101	382/17799	0.369194	0.427327	0.348181	UHRF1/HELLS/DMBX1	3
GO_BP_MM_ELEVATION_OF_CYTOSOLIC_CALCIUM_ION_CONCENTRATION	GO_BP_MM_ELEVATION_OF_CYTOSOLIC_CALCIUM_ION_CONCENTRATION	1/101	81/17799	0.369967	0.427327	0.348181	CCKAR	1
GO_MF_MM_ACID-AMINO_ACID_LIGASE_ACTIVITY	GO_MF_MM_ACID-AMINO_ACID_LIGASE_ACTIVITY	1/101	81/17799	0.369967	0.427327	0.348181	UBE2C	1
GO_BP_MM_BIOSYNTHETIC_PROCESS	GO_BP_MM_BIOSYNTHETIC_PROCESS	1/101	82/17799	0.373559	0.430363	0.350655	TDH	1
GO_BP_MM_CATION_TRANSPORT	GO_BP_MM_CATION_TRANSPORT	1/101	83/17799	0.37713	0.43336	0.353097	ATP13A4	1
GO_BP_MM_LIVER_DEVELOPMENT	GO_BP_MM_LIVER_DEVELOPMENT	1/101	85/17799	0.384212	0.440366	0.358805	HMGCS2	1
GO_MF_MM_CYSTEINE-TYPE_PEPTIDASE_ACTIVITY	GO_MF_MM_CYSTEINE-TYPE_PEPTIDASE_ACTIVITY	1/101	86/17799	0.387723	0.443254	0.361158	ESPL1	1
GO_MF_MM_METALLOPEPTIDASE_ACTIVITY	GO_MF_MM_METALLOPEPTIDASE_ACTIVITY	1/101	88/17799	0.394686	0.450063	0.366706	ACE2	1
GO_BP_MM_CHROMATIN_MODIFICATION	GO_BP_MM_CHROMATIN_MODIFICATION	1/101	89/17799	0.398138	0.451694	0.368035	ASF1B	1
GO_CC_MM_NUCLEAR_ENVELOPE	GO_CC_MM_NUCLEAR_ENVELOPE	1/101	89/17799	0.398138	0.451694	0.368035	CENPF	1
GO_BP_MM_SODIUM_ION_TRANSPORT	GO_BP_MM_SODIUM_ION_TRANSPORT	1/101	90/17799	0.40157	0.454435	0.370268	SLC4A11	1
GO_CC_MM_PERINUCLEAR_REGION_OF_CYTOPLASM	GO_CC_MM_PERINUCLEAR_REGION_OF_CYTOPLASM	3/101	404/17799	0.40306	0.454969	0.370704	CDC20/RAD51/MCM3	3
GO_MF_MM_CHROMATIN_BINDING	GO_MF_MM_CHROMATIN_BINDING	2/101	244/17799	0.404117	0.455013	0.37074	TOP2A/HELLS	2
GO_CC_MM_CELL-CELL_JUNCTION	GO_CC_MM_CELL-CELL_JUNCTION	1/101	94/17799	0.415107	0.466213	0.379865	ECT2	1
GO_MF_MM_PROTEIN_TYROSINE_PHOSPHATASE_ACTIVITY	GO_MF_MM_PROTEIN_TYROSINE_PHOSPHATASE_ACTIVITY	1/101	96/17799	0.421761	0.471318	0.384025	CDC25C	1
GO_MF_MM_UNFOLDED_PROTEIN_BINDING	GO_MF_MM_UNFOLDED_PROTEIN_BINDING	1/101	96/17799	0.421761	0.471318	0.384025	CALR4	1
GO_MF_MM_ATP-DEPENDENT_HELICASE_ACTIVITY	GO_MF_MM_ATP-DEPENDENT_HELICASE_ACTIVITY	1/101	97/17799	0.42506	0.472642	0.385103	POLQ	1
GO_MF_MM_PHOSPHOTRANSFERASE_ACTIVITY_ALCOHOL_GROUP_AS_ACCEPTOR	GO_MF_MM_PHOSPHOTRANSFERASE_ACTIVITY_ALCOHOL_GROUP_AS_ACCEPTOR	1/101	97/17799	0.42506	0.472642	0.385103	MELK	1
GO_BP_MM_KIDNEY_DEVELOPMENT	GO_BP_MM_KIDNEY_DEVELOPMENT	1/101	100/17799	0.434846	0.481129	0.392018	HMGCS2	1
GO_CC_MM_PEROXISOME	GO_CC_MM_PEROXISOME	1/101	100/17799	0.434846	0.481129	0.392018	ACOT3	1
GO_CC_MM_TIGHT_JUNCTION	GO_CC_MM_TIGHT_JUNCTION	1/101	103/17799	0.444467	0.490559	0.399702	ECT2	1
GO_MF_MM_HEPARIN_BINDING	GO_MF_MM_HEPARIN_BINDING	1/101	104/17799	0.447637	0.492842	0.401562	SLIT2	1
GO_BP_MM_AXON_GUIDANCE	GO_BP_MM_AXON_GUIDANCE	1/101	106/17799	0.453925	0.498537	0.406202	SLIT2	1
GO_BP_MM_NEGATIVE_REGULATION_OF_CELL_GROWTH	GO_BP_MM_NEGATIVE_REGULATION_OF_CELL_GROWTH	1/101	108/17799	0.460142	0.502893	0.409752	SLIT2	1
GO_CC_MM_NUCLEOSOME	GO_CC_MM_NUCLEOSOME	1/101	108/17799	0.460142	0.502893	0.409752	CENPA	1
GO_BP_MM_POSITIVE_REGULATION_OF_I-KAPPAB_KINASE_NF-KAPPAB_CASCADE	GO_BP_MM_POSITIVE_REGULATION_OF_I-KAPPAB_KINASE_NF-KAPPAB_CASCADE	1/101	118/17799	0.490191	0.534427	0.435445	ECT2	1
GO_MF_MM_DOUBLE-STRANDED_DNA_BINDING	GO_MF_MM_DOUBLE-STRANDED_DNA_BINDING	1/101	119/17799	0.493103	0.535693	0.436477	RAD51	1
GO_CC_MM_MITOCHONDRIAL_INNER_MEMBRANE	GO_CC_MM_MITOCHONDRIAL_INNER_MEMBRANE	2/101	291/17799	0.493749	0.535693	0.436477	HMGCS2/SLC25A34	2
GO_BP_MM_PROTEIN_TRANSPORT	GO_BP_MM_PROTEIN_TRANSPORT	3/101	469/17799	0.499493	0.540614	0.440486	KIF20A/CENPF/ECT2	3
GO_BP_MM_RESPONSE_TO_VIRUS	GO_BP_MM_RESPONSE_TO_VIRUS	1/101	124/17799	0.507419	0.545632	0.444575	ACE2	1
GO_BP_MM_APOPTOTIC_PROCESS	GO_BP_MM_APOPTOTIC_PROCESS	3/101	476/17799	0.509437	0.545632	0.444575	CDK1/TPX2/MELK	3
GO_CC_MM_NUCLEAR_MEMBRANE	GO_CC_MM_NUCLEAR_MEMBRANE	1/101	125/17799	0.510233	0.545632	0.444575	DTL	1
GO_CC_MM_RIBONUCLEOPROTEIN_COMPLEX	GO_CC_MM_RIBONUCLEOPROTEIN_COMPLEX	1/101	125/17799	0.510233	0.545632	0.444575	BRCA1	1
GO_MF_MM_CALMODULIN_BINDING	GO_MF_MM_CALMODULIN_BINDING	1/101	125/17799	0.510233	0.545632	0.444575	ASPM	1
GO_BP_MM_PROTEIN_DEPHOSPHORYLATION	GO_BP_MM_PROTEIN_DEPHOSPHORYLATION	1/101	126/17799	0.513032	0.547316	0.445947	CDC25C	1
GO_BP_MM_CELL_SURFACE_RECEPTOR_SIGNALING_PATHWAY	GO_BP_MM_CELL_SURFACE_RECEPTOR_SIGNALING_PATHWAY	1/101	130/17799	0.52407	0.55776	0.454457	NCAM1	1
GO_CC_MM_ENDOPLASMIC_RETICULUM_MEMBRANE	GO_CC_MM_ENDOPLASMIC_RETICULUM_MEMBRANE	3/101	489/17799	0.527633	0.559538	0.455905	CREB3L3/LRRTM1/GIMAP1	3
GO_BP_MM_PROTEIN_FOLDING	GO_BP_MM_PROTEIN_FOLDING	1/101	132/17799	0.529496	0.559538	0.455905	CALR4	1
GO_MF_MM_PEPTIDASE_ACTIVITY	GO_MF_MM_PEPTIDASE_ACTIVITY	1/101	132/17799	0.529496	0.559538	0.455905	ESPL1	1
GO_CC_MM_ENDOSOME	GO_CC_MM_ENDOSOME	1/101	136/17799	0.540164	0.568125	0.462902	CCKAR	1
GO_MF_MM_UBIQUITIN_PROTEIN_LIGASE_BINDING	GO_MF_MM_UBIQUITIN_PROTEIN_LIGASE_BINDING	1/101	136/17799	0.540164	0.568125	0.462902	BRCA1	1
GO_BP_MM_POSITIVE_REGULATION_OF_CELL_PROLIFERATION	GO_BP_MM_POSITIVE_REGULATION_OF_CELL_PROLIFERATION	2/101	329/17799	0.55981	0.587406	0.478612	CDC20/MYCN	2
GO_CC_MM_SYNAPSE	GO_CC_MM_SYNAPSE	1/101	146/17799	0.565798	0.592299	0.482599	MGLL	1
GO_BP_MM_SMALL_GTPASE_MEDIATED_SIGNAL_TRANSDUCTION	GO_BP_MM_SMALL_GTPASE_MEDIATED_SIGNAL_TRANSDUCTION	1/101	155/17799	0.587656	0.613744	0.500071	GM4841	1
GO_MF_MM_KINASE_ACTIVITY	GO_MF_MM_KINASE_ACTIVITY	1/101	157/17799	0.592364	0.617218	0.502902	CDK1	1
GO_BP_MM_POSITIVE_REGULATION_OF_GENE_EXPRESSION	GO_BP_MM_POSITIVE_REGULATION_OF_GENE_EXPRESSION	1/101	162/17799	0.603901	0.627776	0.511505	CDK1	1
GO_MF_MM_TRANSCRIPTION_REGULATORY_REGION_DNA_BINDING	GO_MF_MM_TRANSCRIPTION_REGULATORY_REGION_DNA_BINDING	1/101	167/17799	0.615114	0.637949	0.519794	BRCA1	1
GO_MF_MM_BINDING	GO_MF_MM_BINDING	2/101	367/17799	0.619591	0.641104	0.522364	NCAPG/ASPM	2
GO_MF_MM_MAGNESIUM_ION_BINDING	GO_MF_MM_MAGNESIUM_ION_BINDING	1/101	173/17799	0.628156	0.648466	0.528363	FIGNL1	1
GO_CC_MM_MEMBRANE_FRACTION	GO_CC_MM_MEMBRANE_FRACTION	2/101	389/17799	0.651287	0.670796	0.546557	ABCC6/CCNB2	2
GO_CC_MM_PROTEINACEOUS_EXTRACELLULAR_MATRIX	GO_CC_MM_PROTEINACEOUS_EXTRACELLULAR_MATRIX	1/101	194/17799	0.670451	0.688946	0.561345	ANGPTL4	1
GO_MF_MM_TRANSPORTER_ACTIVITY	GO_MF_MM_TRANSPORTER_ACTIVITY	1/101	204/17799	0.688881	0.706261	0.575454	SLC4A11	1
GO_CC_MM_APICAL_PLASMA_MEMBRANE	GO_CC_MM_APICAL_PLASMA_MEMBRANE	1/101	210/17799	0.699445	0.715451	0.582941	ABCC6	1
GO_BP_MM_IMMUNE_RESPONSE	GO_BP_MM_IMMUNE_RESPONSE	1/101	214/17799	0.70629	0.720803	0.587302	H2-AA	1
GO_MF_MM_TRANSCRIPTION_FACTOR_BINDING	GO_MF_MM_TRANSCRIPTION_FACTOR_BINDING	1/101	251/17799	0.762718	0.776617	0.632779	CENPF	1
GO_CC_MM_NEURONAL_CELL_BODY	GO_CC_MM_NEURONAL_CELL_BODY	1/101	261/17799	0.77603	0.787896	0.641968	NCAM1	1
GO_CC_MM_TRANSCRIPTION_FACTOR_COMPLEX	GO_CC_MM_TRANSCRIPTION_FACTOR_COMPLEX	1/101	262/17799	0.77732	0.787896	0.641968	DMBX1	1
GO_BP_MM_NEGATIVE_REGULATION_OF_CELL_PROLIFERATION	GO_BP_MM_NEGATIVE_REGULATION_OF_CELL_PROLIFERATION	1/101	274/17799	0.792236	0.801198	0.652807	SLIT2	1
GO_MF_MM_ACTIN_BINDING	GO_MF_MM_ACTIN_BINDING	1/101	277/17799	0.795807	0.802993	0.65427	ANLN	1
GO_CC_MM_GOLGI_MEMBRANE	GO_CC_MM_GOLGI_MEMBRANE	1/101	306/17799	0.827347	0.832937	0.678668	GIMAP1	1
GO_MF_MM_PHOSPHOLIPID_BINDING	GO_MF_MM_PHOSPHOLIPID_BINDING	1/101	312/17799	0.833243	0.836988	0.681968	ANLN	1
GO_BP_MM_CELL_ADHESION	GO_BP_MM_CELL_ADHESION	1/101	321/17799	0.841716	0.843603	0.687358	TROAP	1
GO_BP_MM_TRANSMEMBRANE_TRANSPORT	GO_BP_MM_TRANSMEMBRANE_TRANSPORT	1/101	442/17799	0.921687	0.921687	0.75098	ABCC6	1

## Sheet: HFD TF UP
ID	Description	GeneRatio	BgRatio	pvalue	p.adjust	qvalue	geneID	Count
TFACTS_MM_E2F1	TFACTS_MM_E2F1	14/40	153/4427	2.04741e-11	1.55603e-09	1.48707e-09	MCM5/ASF1B/BRCA1/CDK1/POLE2/RACGAP1/HELLS/RAD51/ECT2/CCNA2/KIF2C/PLK1/MYCN/DTL	14
TFACTS_MM_E2F4	TFACTS_MM_E2F4	5/40	38/4427	1.87783e-05	0.000713577	0.00068195	MCM5/ASF1B/BRCA1/CDK1/MYCN	5
TFACTS_MM_E2F2	TFACTS_MM_E2F2	4/40	31/4427	0.000150861	0.0038218	0.00365241	MCM5/ASF1B/PLK1/MYCN	4
TFACTS_MM_E2F3	TFACTS_MM_E2F3	4/40	35/4427	0.000244585	0.00464711	0.00444114	MCM5/ASF1B/PLK1/MYCN	4
TFACTS_MM_FOXO1	TFACTS_MM_FOXO1	5/40	153/4427	0.0114444	0.173954	0.166244	MCM5/CDK1/NEK2/CCNB2/ASPM	5
TF_MM_WINGENDER_JUN	TF_MM_WINGENDER_JUN	2/40	28/4427	0.025949	0.327003	0.31251	H2-AA/SOCS3	2
TFACTS_MM_TP53	TFACTS_MM_TP53	4/40	132/4427	0.0301187	0.327003	0.31251	BRCA1/RAD51/PLK1/MKI67	4
TF_MM_ZHAO_TRP53	TF_MM_ZHAO_TRP53	3/40	98/4427	0.0576336	0.421224	0.402555	GTSE1/MKI67/CDC25C	3
TF_MM_WINGENDER_CEBPB	TF_MM_WINGENDER_CEBPB	2/40	46/4427	0.0642062	0.421224	0.402555	MCM3/CDC25C	2
TFACTS_MM_STAT5A	TFACTS_MM_STAT5A	2/40	48/4427	0.0691971	0.421224	0.402555	RAD51/SOCS3	2
TFACTS_MM_STAT5B	TFACTS_MM_STAT5B	2/40	48/4427	0.0691971	0.421224	0.402555	RAD51/SOCS3	2
TF_MM_ZHAO_FLI1	TF_MM_ZHAO_FLI1	1/40	10/4427	0.0868528	0.421224	0.402555	UBE2C	1
TFACTS_MM_ATF1	TFACTS_MM_ATF1	2/40	56/4427	0.0903502	0.421224	0.402555	BRCA1/TOP2A	2
TF_MM_ZHAO_E2F	TF_MM_ZHAO_E2F	2/40	57/4427	0.0931165	0.421224	0.402555	BRCA1/SOCS3	2
TFACTS_MM_HNF1B	TFACTS_MM_HNF1B	1/40	11/4427	0.0951221	0.421224	0.402555	SOCS3	1
TF_MM_WINGENDER_E2F-1	TF_MM_WINGENDER_E2F-1	1/40	12/4427	0.103318	0.421224	0.402555	BRCA1	1
TF_MM_ZHAO_BCL6	TF_MM_ZHAO_BCL6	1/40	12/4427	0.103318	0.421224	0.402555	CCNA2	1
TF_MM_ZHAO_PPARD	TF_MM_ZHAO_PPARD	1/40	13/4427	0.111442	0.421224	0.402555	ANGPTL4	1
TF_MM_WINGENDER_PPARG	TF_MM_WINGENDER_PPARG	1/40	14/4427	0.119495	0.421224	0.402555	HMGCS2	1
TFACTS_MM_PPARD	TFACTS_MM_PPARD	1/40	14/4427	0.119495	0.421224	0.402555	ANGPTL4	1
TF_MM_ZHAO_LEF1	TF_MM_ZHAO_LEF1	1/40	15/4427	0.127476	0.421224	0.402555	NCAM1	1
TF_MM_ZHAO_STAT5B	TF_MM_ZHAO_STAT5B	1/40	15/4427	0.127476	0.421224	0.402555	SOCS3	1
TFACTS_MM_SMAD7	TFACTS_MM_SMAD7	1/40	15/4427	0.127476	0.421224	0.402555	CDK1	1
TF_MM_ZHAO_STAT1	TF_MM_ZHAO_STAT1	1/40	17/4427	0.143227	0.426339	0.407443	SOCS3	1
TF_MM_WINGENDER_FOS	TF_MM_WINGENDER_FOS	1/40	19/4427	0.1587	0.426339	0.407443	SOCS3	1
TF_MM_ZHAO_HOXA1	TF_MM_ZHAO_HOXA1	1/40	19/4427	0.1587	0.426339	0.407443	NCAM1	1
TFACTS_MM_NR2F1	TFACTS_MM_NR2F1	1/40	19/4427	0.1587	0.426339	0.407443	HMGCS2	1
TF_MM_FRIARD_FREAC-4	TF_MM_FRIARD_FREAC-4	1/40	20/4427	0.166335	0.426339	0.407443	SPC25	1
TF_MM_FRIARD_HSF2	TF_MM_FRIARD_HSF2	2/40	83/4427	0.172043	0.426339	0.407443	ASF1B/MYCN	2
TF_MM_WINGENDER_STAT3	TF_MM_WINGENDER_STAT3	1/40	21/4427	0.173901	0.426339	0.407443	SOCS3	1
TFACTS_MM_FOXA2	TFACTS_MM_FOXA2	1/40	21/4427	0.173901	0.426339	0.407443	FGB	1
TF_MM_ZHAO_E2F-1	TF_MM_ZHAO_E2F-1	1/40	22/4427	0.181401	0.430828	0.411733	BRCA1	1
TF_MM_FRIARD_EGR	TF_MM_FRIARD_EGR	1/40	23/4427	0.188834	0.434891	0.415616	MYCN	1
TF_MM_ZHAO_STAT3	TF_MM_ZHAO_STAT3	1/40	25/4427	0.203504	0.454892	0.43473	SOCS3	1
TF_MM_ZHAO_PPARA	TF_MM_ZHAO_PPARA	1/40	26/4427	0.210742	0.457611	0.437329	ANGPTL4	1
TFACTS_MM_ETS2	TFACTS_MM_ETS2	1/40	28/4427	0.225025	0.475053	0.453998	CDK1	1
TFACTS_MM_CEBPA	TFACTS_MM_CEBPA	2/40	103/4427	0.238272	0.488977	0.467305	UHRF1/CCNB2	2
TFACTS_MM_ETV4	TFACTS_MM_ETV4	1/40	31/4427	0.245979	0.488977	0.467305	RAD51	1
TF_MM_ZHAO_HOXC8	TF_MM_ZHAO_HOXC8	1/40	32/4427	0.25284	0.488977	0.467305	NCAM1	1
TF_MM_FRIARD_NF-Y	TF_MM_FRIARD_NF-Y	3/40	195/4427	0.257356	0.488977	0.467305	NEK2/ECT2/KIF22	3
TF_MM_FRIARD_TCF-4	TF_MM_FRIARD_TCF-4	1/40	38/4427	0.292745	0.50487	0.482494	MYCN	1
TF_MM_WINGENDER_CREB1	TF_MM_WINGENDER_CREB1	1/40	38/4427	0.292745	0.50487	0.482494	SOCS3	1
TFACTS_MM_PPARG	TFACTS_MM_PPARG	1/40	38/4427	0.292745	0.50487	0.482494	ANGPTL4	1
TFACTS_MM_SP3	TFACTS_MM_SP3	2/40	121/4427	0.299078	0.50487	0.482494	MYCN/CDC25C	2
TF_MM_ZHAO_CEBPA	TF_MM_ZHAO_CEBPA	1/40	40/4427	0.305579	0.50487	0.482494	CCNB2	1
TF_MM_ZHAO_PPARG	TF_MM_ZHAO_PPARG	1/40	40/4427	0.305579	0.50487	0.482494	ANGPTL4	1
TFACTS_MM_TBP	TFACTS_MM_TBP	1/40	43/4427	0.324406	0.524571	0.501321	HMGCS2	1
TFACTS_MM_LEF1	TFACTS_MM_LEF1	1/40	48/4427	0.354683	0.559263	0.534476	NCAM1	1
TFACTS_MM_STAT1	TFACTS_MM_STAT1	1/40	49/4427	0.360578	0.559263	0.534476	SOCS3	1
TF_MM_ZHAO_NFIC	TF_MM_ZHAO_NFIC	1/40	54/4427	0.389272	0.591694	0.565469	NCAM1	1
TFACTS_MM_STAT3	TFACTS_MM_STAT3	1/40	60/4427	0.422052	0.62894	0.601064	SOCS3	1
TF_MM_ZHAO_NFKB1	TF_MM_ZHAO_NFKB1	1/40	68/4427	0.463101	0.660162	0.630903	BRCA1	1
TFACTS_MM_SP1	TFACTS_MM_SP1	4/40	388/4427	0.470014	0.660162	0.630903	CDK1/KIF2C/NCAM1/CDC25C	4
TFACTS_MM_FOXO3	TFACTS_MM_FOXO3	1/40	70/4427	0.47291	0.660162	0.630903	ASPM	1
TF_MM_FRIARD_AP-2ALPHA	TF_MM_FRIARD_AP-2ALPHA	1/40	71/4427	0.477749	0.660162	0.630903	MYCN	1
TF_MM_ZHAO_AR	TF_MM_ZHAO_AR	1/40	73/4427	0.487298	0.661332	0.632021	ANGPTL4	1
TFACTS_MM_USF2	TFACTS_MM_USF2	1/40	76/4427	0.501302	0.663502	0.634095	BRCA1	1
TFACTS_MM_CREB1	TFACTS_MM_CREB1	2/40	192/4427	0.523459	0.663502	0.634095	BRCA1/PCDHB21	2
TF_MM_FRIARD_IRF-7	TF_MM_FRIARD_IRF-7	1/40	81/4427	0.523818	0.663502	0.634095	ESPL1	1
TF_MM_ZHAO_CREB1	TF_MM_ZHAO_CREB1	1/40	81/4427	0.523818	0.663502	0.634095	BRCA1	1
TFACTS_MM_EGR1	TFACTS_MM_EGR1	1/40	84/4427	0.536848	0.66886	0.639215	RAD51	1
TF_MM_FRIARD_IY	TF_MM_FRIARD_IY	1/40	93/4427	0.573888	0.675606	0.645662	SPC25	1
TFACTS_MM_GLI2	TFACTS_MM_GLI2	1/40	93/4427	0.573888	0.675606	0.645662	CDK1	1
TF_MM_FRIARD_SRY	TF_MM_FRIARD_SRY	1/40	94/4427	0.577821	0.675606	0.645662	ESPL1	1
TF_MM_WINGENDER_SP3	TF_MM_WINGENDER_SP3	1/40	94/4427	0.577821	0.675606	0.645662	SOCS3	1
TF_MM_ZHAO_TCFAP2A	TF_MM_ZHAO_TCFAP2A	1/40	102/4427	0.608034	0.697898	0.666966	PLK1	1
TFACTS_MM_TFAP2A	TFACTS_MM_TFAP2A	1/40	104/4427	0.615252	0.697898	0.666966	PCDHB21	1
TFACTS_MM_JUN	TFACTS_MM_JUN	1/40	115/4427	0.652691	0.722455	0.690434	SERPINF2	1
TFACTS_MM_GLI1	TFACTS_MM_GLI1	1/40	116/4427	0.655913	0.722455	0.690434	SLIT2	1
TFACTS_MM_ETS1	TFACTS_MM_ETS1	1/40	122/4427	0.67464	0.732467	0.700003	RAD51	1
TF_MM_FRIARD_ELF-1	TF_MM_FRIARD_ELF-1	1/40	139/4427	0.722467	0.773345	0.739069	MELK	1
TF_MM_FRIARD_LEF1	TF_MM_FRIARD_LEF1	2/40	308/4427	0.778325	0.821565	0.785152	MYCN/MUG1	2
TF_MM_FRIARD_AML1	TF_MM_FRIARD_AML1	1/40	211/4427	0.859463	0.894784	0.855126	POLQ	1
TF_MM_FRIARD_PEA3	TF_MM_FRIARD_PEA3	1/40	242/4427	0.895531	0.919735	0.878971	UBE2C	1
TF_MM_FRIARD_ER	TF_MM_FRIARD_ER	1/40	270/4427	0.920234	0.924732	0.883747	NEK2	1
TFACTS_MM_CTNNB1	TFACTS_MM_CTNNB1	1/40	276/4427	0.924732	0.924732	0.883747	MYCN	1

## Sheet: HFD GO DOWN
ID	Description	GeneRatio	BgRatio	pvalue	p.adjust	qvalue	geneID	Count
GO_CC_MM_EXTRACELLULAR_MATRIX	GO_CC_MM_EXTRACELLULAR_MATRIX	42/318	193/17799	1.32183e-33	1.44476e-30	1.12704e-30	SERPINF1/COL6A1/COL1A1/SHH/NID1/FBLN1/ADAMTS4/RARRES2/LPL/SLPI/MMP7/DCN/COL6A2/AEBP1/FBLN5/ASPN/VCAN/CCDC80/THBS2/COL3A1/DPT/COL5A1/FBN1/POSTN/ECM1/COL15A1/TNC/EMILIN1/COL1A2/MGP/MMP2/CRISPLD2/COL12A1/MAMDC2/ABI3BP/TGFBI/LUM/FMOD/ECM2/COL6A6/NDNF/LGALS3	42
GO_CC_MM_PROTEINACEOUS_EXTRACELLULAR_MATRIX	GO_CC_MM_PROTEINACEOUS_EXTRACELLULAR_MATRIX	29/318	194/17799	1.12427e-18	6.14416e-16	4.79296e-16	COL1A1/NID1/ADAMTS4/MMP7/DCN/ASPN/VCAN/THBS4/BMP4/LCP1/WNT7B/FBN2/CLEC3B/DPT/FBN1/POSTN/ECM1/PODN/EMILIN1/SPARCL1/MMP2/TGFBI/LUM/CPZ/FMOD/MFAP4/LGALS3/NYX/TNFRSF11B	29
GO_BP_MM_CELL_ADHESION	GO_BP_MM_CELL_ADHESION	33/318	321/17799	4.41643e-16	1.60905e-13	1.2552e-13	COL6A1/CD44/CD34/SULF1/ADA/LAMA2/COL6A2/AEBP1/FBLN5/VCAN/THBS4/ACHE/THBS2/EMILIN2/NRP2/DPT/DDR2/ITGA8/ENG/COL5A1/CPXM1/POSTN/THBS3/COL15A1/TNC/SVEP1/EMILIN1/GPNMB/COL12A1/TGFBI/MFAP4/COL6A6/TNFAIP6	33
GO_BP_MM_EXTRACELLULAR_MATRIX_ORGANIZATION	GO_BP_MM_EXTRACELLULAR_MATRIX_ORGANIZATION	17/318	83/17799	8.83136e-14	2.41317e-11	1.88247e-11	NID1/FBLN1/FBLN5/CCDC80/ITGA8/POSTN/RECK/EMILIN1/PDGFRA/CRISPLD2/ABI3BP/TGFBI/ECM2/NDNF/LGALS3/TNFRSF11B/SERPINB5	17
GO_MF_MM_HEPARIN_BINDING	GO_MF_MM_HEPARIN_BINDING	18/318	104/17799	3.52851e-13	7.71332e-11	6.01703e-11	LPL/THBS4/BMP4/CCDC80/THBS2/CLEC3B/NRP2/CFH/COL5A1/POSTN/THBS3/GPNMB/CRISPLD2/LTF/ABI3BP/CCL2/ECM2/NDNF	18
GO_MF_MM_COLLAGEN_BINDING	GO_MF_MM_COLLAGEN_BINDING	11/318	37/17799	2.81689e-11	5.13144e-09	4.00295e-09	NID1/DCN/SRGN/MRC2/THBS4/ACHE/DDR2/PODN/ABI3BP/LUM/ECM2	11
GO_MF_MM_GLYCOSAMINOGLYCAN_BINDING	GO_MF_MM_GLYCOSAMINOGLYCAN_BINDING	8/318	20/17799	9.93974e-10	1.55202e-07	1.2107e-07	SHH/DCN/CCDC80/ENG/CRISPLD2/MAMDC2/ABI3BP/NDNF	8
GO_CC_MM_COLLAGEN	GO_CC_MM_COLLAGEN	13/318	78/17799	1.15118e-09	1.5728e-07	1.22692e-07	COL6A1/COL1A1/COL6A2/EMILIN2/COL5A2/COL3A1/COL5A1/COL15A1/EMILIN1/COL1A2/COLEC12/COL6A6/C1QTNF7	13
GO_MF_MM_PLATELET-DERIVED_GROWTH_FACTOR_BINDING	GO_MF_MM_PLATELET-DERIVED_GROWTH_FACTOR_BINDING	6/318	11/17799	1.32961e-08	1.61474e-06	1.25963e-06	COL6A1/COL1A1/COL3A1/COL5A1/PDGFRA/COL1A2	6
GO_CC_MM_BASEMENT_MEMBRANE	GO_CC_MM_BASEMENT_MEMBRANE	12/318	85/17799	3.52614e-08	3.85407e-06	3.0065e-06	NID1/FBLN1/LAMA2/THBS4/CCDC80/RUNX1/THBS2/COL5A1/FBN1/COL15A1/TNC/TGFBI	12
GO_MF_MM_EXTRACELLULAR_MATRIX_STRUCTURAL_CONSTITUENT	GO_MF_MM_EXTRACELLULAR_MATRIX_STRUCTURAL_CONSTITUENT	7/318	25/17799	1.98358e-07	1.8078e-05	1.41024e-05	COL1A1/FBN2/COL5A2/COL3A1/COL5A1/FBN1/COL1A2	7
GO_BP_MM_SKELETAL_SYSTEM_DEVELOPMENT	GO_BP_MM_SKELETAL_SYSTEM_DEVELOPMENT	11/318	81/17799	1.98478e-07	1.8078e-05	1.41024e-05	COL1A1/TBX3/BMP4/RUNX1/CLEC3B/COL5A2/COL3A1/FBN1/COL1A2/BMP5/LGALS3	11
GO_BP_MM_LUNG_DEVELOPMENT	GO_BP_MM_LUNG_DEVELOPMENT	12/318	103/17799	3.07617e-07	2.58635e-05	2.01757e-05	TBX4/SHH/HSD11B1/ADA/BMP4/ZFPM2/WNT7B/GLI1/PDGFRA/MGP/STRA6/LIF	12
GO_BP_MM_CELLULAR_RESPONSE_TO_AMINO_ACID_STIMULUS	GO_BP_MM_CELLULAR_RESPONSE_TO_AMINO_ACID_STIMULUS	7/318	33/17799	1.55919e-06	0.000121728	9.4958e-05	COL6A1/COL1A1/COL5A2/COL3A1/PDGFRA/COL1A2/MMP2	7
GO_BP_MM_COLLAGEN_FIBRIL_ORGANIZATION	GO_BP_MM_COLLAGEN_FIBRIL_ORGANIZATION	7/318	34/17799	1.93355e-06	0.000140891	0.000109907	COL1A1/COL5A2/COL3A1/DPT/DDR2/COL5A1/COL1A2	7
GO_CC_MM_CELL_SURFACE	GO_CC_MM_CELL_SURFACE	20/318	334/17799	2.62569e-06	0.000179367	0.000139922	AXL/SHH/CD44/LPL/CD34/SULF1/ADA/MRC2/WNT7B/ACHE/ENG/IL6RA/NTRK1/ADCYAP1R1/SCNN1B/THY1/FGFBP1/PTPRT/HHIP/THBD	20
GO_MF_MM_TRANSMEMBRANE_RECEPTOR_PROTEIN_TYROSINE_KINASE_ACTIVITY	GO_MF_MM_TRANSMEMBRANE_RECEPTOR_PROTEIN_TYROSINE_KINASE_ACTIVITY	7/318	37/17799	3.53416e-06	0.000227226	0.000177255	AXL/INSRR/DDR2/NTRK1/PDGFRA/RET/MST1R	7
GO_CC_MM_INTERSTITIAL_MATRIX	GO_CC_MM_INTERSTITIAL_MATRIX	5/318	15/17799	4.57313e-06	0.00026452	0.000206347	CCDC80/TNC/MAMDC2/ABI3BP/ECM2	5
GO_BP_MM_POSITIVE_REGULATION_OF_ANGIOGENESIS	GO_BP_MM_POSITIVE_REGULATION_OF_ANGIOGENESIS	9/318	71/17799	4.66499e-06	0.00026452	0.000206347	GATA2/CD34/PTGIS/CCL11/ENG/NTRK1/ECM1/ADM/ETS1	9
GO_BP_MM_RESPONSE_TO_WOUNDING	GO_BP_MM_RESPONSE_TO_WOUNDING	8/318	54/17799	4.84025e-06	0.00026452	0.000206347	SLC1A2/VCAN/IL6/TNC/ADM/ETS1/CYP1A1/CCL2	8
GO_BP_MM_RESPONSE_TO_LIPOPOLYSACCHARIDE	GO_BP_MM_RESPONSE_TO_LIPOPOLYSACCHARIDE	13/318	161/17799	6.6081e-06	0.000343936	0.000268299	DCN/ACE/IL6/IL6RA/CXCL5/ADM/EDNRA/CYP1A1/PTGS2/CCL2/ABCC8/EPHA3/THBD	13
GO_BP_MM_POSITIVE_REGULATION_OF_CELL_PROLIFERATION	GO_BP_MM_POSITIVE_REGULATION_OF_CELL_PROLIFERATION	19/318	329/17799	7.87464e-06	0.000387858	0.000302561	SHH/TBX3/CSF2/BMP4/WNT7B/GLI1/IL6/DDR2/IL6RA/TNC/PDGFRA/ADM/VEGFC/EDNRA/ETS1/RAC2/LIF/FGFBP1/ZFP703	19
GO_MF_MM_GLUTATHIONE_TRANSFERASE_ACTIVITY	GO_MF_MM_GLUTATHIONE_TRANSFERASE_ACTIVITY	6/318	28/17799	8.38919e-06	0.000387858	0.000302561	GSTM3/GSTO1/HPGDS/GSTA4/GSTP2/GSTA1	6
GO_MF_MM_RECEPTOR_BINDING	GO_MF_MM_RECEPTOR_BINDING	17/318	272/17799	8.51654e-06	0.000387858	0.000302561	COL1A1/RARRES2/LPL/LAMA2/WNT7B/IL6/COL5A2/COL3A1/COL5A1/TNC/COL1A2/SRPX2/ITGBL1/LIF/ITLN1/FGL2/MFAP4	17
GO_BP_MM_BLOOD_VESSEL_DEVELOPMENT	GO_BP_MM_BLOOD_VESSEL_DEVELOPMENT	8/318	60/17799	1.08465e-05	0.000455968	0.000355694	COL1A1/TBX3/BMP4/COL3A1/COL5A1/COL1A2/STRA6/SOX18	8
GO_BP_MM_TRANSMEMBRANE_RECEPTOR_PROTEIN_TYROSINE_KINASE_SIGNALING_PATHWAY	GO_BP_MM_TRANSMEMBRANE_RECEPTOR_PROTEIN_TYROSINE_KINASE_SIGNALING_PATHWAY	8/318	60/17799	1.08465e-05	0.000455968	0.000355694	INSRR/GFRA2/DDR2/PDGFRA/RET/MST1R/EPHA3/PTPRT	8
GO_BP_MM_POSITIVE_REGULATION_OF_CELL-SUBSTRATE_ADHESION	GO_BP_MM_POSITIVE_REGULATION_OF_CELL-SUBSTRATE_ADHESION	6/318	31/17799	1.56718e-05	0.000634418	0.000494899	NID1/CCDC80/EMILIN1/ABI3BP/ECM2/NDNF	6
GO_BP_MM_ANGIOGENESIS	GO_BP_MM_ANGIOGENESIS	13/318	175/17799	1.62801e-05	0.000635504	0.000495746	TBX4/SHH/TNFAIP2/BMP4/ENG/ECM1/SRPX2/VEGFC/MMP2/THY1/CCL2/TGFBI/SOX18	13
GO_BP_MM_RESPONSE_TO_MECHANICAL_STIMULUS	GO_BP_MM_RESPONSE_TO_MECHANICAL_STIMULUS	7/318	49/17799	2.45422e-05	0.000924987	0.000721567	COL1A1/DCN/BMP4/IL6/MGP/ETS1/CCL2	7
GO_BP_MM_NEGATIVE_REGULATION_OF_ANGIOGENESIS	GO_BP_MM_NEGATIVE_REGULATION_OF_ANGIOGENESIS	7/318	50/17799	2.81048e-05	0.00102395	0.000798769	SERPINF1/SULF1/THBS4/THBS2/LIF/CCL2/HHIP	7
GO_BP_MM_PROTEIN_HETEROTRIMERIZATION	GO_BP_MM_PROTEIN_HETEROTRIMERIZATION	4/318	11/17799	2.98823e-05	0.00105359	0.00082189	COL6A1/COL1A1/COL6A2/COL1A2	4
GO_BP_MM_IMMUNE_RESPONSE	GO_BP_MM_IMMUNE_RESPONSE	14/318	214/17799	3.2262e-05	0.00110195	0.000859612	CSF2/CCL11/IL6/CCL20/CXCL5/CXCL3/LIF/CCL2/COLEC12/CSF3/LAX1/CXCL2/H2-Q10/C7	14
GO_BP_MM_VASCULAR_ENDOTHELIAL_GROWTH_FACTOR_RECEPTOR_SIGNALING_PATHWAY	GO_BP_MM_VASCULAR_ENDOTHELIAL_GROWTH_FACTOR_RECEPTOR_SIGNALING_PATHWAY	5/318	22/17799	3.61834e-05	0.00119844	0.000934881	SULF1/PDGFRA/VEGFC/CCL2/IGSF10	5
GO_CC_MM_SARCOLEMMA	GO_CC_MM_SARCOLEMMA	8/318	71/17799	3.80462e-05	0.00122307	0.000954101	COL6A1/LAMA2/COL6A2/ANXA1/ALOX5/DES/ABCC8/FLNC	8
GO_BP_MM_OSSIFICATION	GO_BP_MM_OSSIFICATION	8/318	73/17799	4.66077e-05	0.00145549	0.00113541	COL1A1/CLEC3B/DDR2/ECM1/MGP/BMP5/IGSF10/ATP6V0A4	8
GO_BP_MM_INFLAMMATORY_RESPONSE	GO_BP_MM_INFLAMMATORY_RESPONSE	13/318	195/17799	5.07157e-05	0.00153979	0.00120116	AXL/PIK3CG/ALOX5/IL6/CCL20/IL1F6/ECM1/TNFRSF1B/CXCL5/CXCL3/PTGS2/CCL2/CXCL2	13
GO_BP_MM_RESPONSE_TO_GLUCOCORTICOID_STIMULUS	GO_BP_MM_RESPONSE_TO_GLUCOCORTICOID_STIMULUS	9/318	97/17799	5.96619e-05	0.00171977	0.00134156	SERPINF1/BMP4/ANXA1/IL6/IL6RA/ADM/ACSBG1/PTGS2/CCL2	9
GO_BP_MM_CELL_MATURATION	GO_BP_MM_CELL_MATURATION	6/318	39/17799	6.15819e-05	0.00171977	0.00134156	AXL/POU2F2/GATA2/BFSP1/SOX18/BHLHA15	6
GO_BP_MM_CELL_MOTILITY	GO_BP_MM_CELL_MOTILITY	4/318	13/17799	6.29375e-05	0.00171977	0.00134156	CD34/ENG/SRPX2/ETS1	4
GO_BP_MM_PROSTAGLANDIN_BIOSYNTHETIC_PROCESS	GO_BP_MM_PROSTAGLANDIN_BIOSYNTHETIC_PROCESS	4/318	13/17799	6.29375e-05	0.00171977	0.00134156	PTGIS/HPGDS/PTGS2/PTGES	4
GO_BP_MM_LUNG_MORPHOGENESIS	GO_BP_MM_LUNG_MORPHOGENESIS	4/318	14/17799	8.68749e-05	0.00231596	0.00180664	SHH/BMP4/WNT7B/TCF21	4
GO_BP_MM_HEART_DEVELOPMENT	GO_BP_MM_HEART_DEVELOPMENT	12/318	179/17799	9.32217e-05	0.00242564	0.0018922	SHH/VCAN/BMP4/ZFPM2/NRP2/COL3A1/ENG/FBN1/ADM/EDNRA/STRA6/SOX18	12
GO_CC_MM_ANCHORED_TO_MEMBRANE	GO_CC_MM_ANCHORED_TO_MEMBRANE	9/318	103/17799	9.54278e-05	0.00242564	0.0018922	LPL/VNN3/GFRA2/ACHE/CD55/RECK/CDH13/TNFRSF23/ITLN1	9
GO_BP_MM_REGULATION_OF_BLOOD_PRESSURE	GO_BP_MM_REGULATION_OF_BLOOD_PRESSURE	6/318	43/17799	0.000108372	0.00269206	0.00210003	CD34/ACE/NPR3/COL1A2/PTGS2/NPY1R	6
GO_BP_MM_SMOOTH_MUSCLE_TISSUE_DEVELOPMENT	GO_BP_MM_SMOOTH_MUSCLE_TISSUE_DEVELOPMENT	4/318	15/17799	0.000116803	0.00283701	0.00221311	BMP4/ITGA8/ENG/STRA6	4
GO_MF_MM_CHEMOKINE_ACTIVITY	GO_MF_MM_CHEMOKINE_ACTIVITY	6/318	44/17799	0.000123617	0.00293726	0.00229131	CCL11/CCL20/CXCL5/CXCL3/CCL2/CXCL2	6
GO_BP_MM_SENSORY_PERCEPTION_OF_PAIN	GO_BP_MM_SENSORY_PERCEPTION_OF_PAIN	6/318	45/17799	0.000140515	0.00326772	0.0025491	ACE/ALOX5/EDNRA/NDN/NPY1R/PENK	6
GO_BP_MM_POSITIVE_REGULATION_OF_NEURON_PROJECTION_DEVELOPMENT	GO_BP_MM_POSITIVE_REGULATION_OF_NEURON_PROJECTION_DEVELOPMENT	6/318	47/17799	0.000179776	0.00394923	0.00308073	AVIL/NTRK1/RET/LIF/NDNF/EPHA3	6
GO_BP_MM_SKIN_DEVELOPMENT	GO_BP_MM_SKIN_DEVELOPMENT	6/318	47/17799	0.000179776	0.00394923	0.00308073	COL1A1/SHH/COL5A2/COL3A1/COL5A1/ASPRV1	6
GO_BP_MM_RESPONSE_TO_HYPOXIA	GO_BP_MM_RESPONSE_TO_HYPOXIA	12/318	192/17799	0.00018066	0.00394923	0.00308073	SHH/ADA/ACE/ENG/ADM/SCNN1B/EDNRA/MMP2/ETS1/CYP1A1/EGLN3/CCL2	12
GO_MF_MM_FIBRONECTIN_BINDING	GO_MF_MM_FIBRONECTIN_BINDING	4/318	17/17799	0.000197983	0.00424306	0.00330994	IGFBP3/THBS4/CCDC80/MFAP2	4
GO_BP_MM_VASCULATURE_DEVELOPMENT	GO_BP_MM_VASCULATURE_DEVELOPMENT	5/318	31/17799	0.000204631	0.00430119	0.00335529	SHH/BMP4/WNT7B/TCF21/SOX18	5
GO_BP_MM_MALE_GENITALIA_DEVELOPMENT	GO_BP_MM_MALE_GENITALIA_DEVELOPMENT	4/318	18/17799	0.000250983	0.00517594	0.00403766	SHH/TBX3/PDGFRA/BMP5	4
GO_BP_MM_EMBRYO_IMPLANTATION	GO_BP_MM_EMBRYO_IMPLANTATION	5/318	33/17799	0.000277602	0.00561888	0.00438319	FBLN1/RECK/MMP2/PTGS2/LIF	5
GO_BP_MM_BIOMINERAL_TISSUE_DEVELOPMENT	GO_BP_MM_BIOMINERAL_TISSUE_DEVELOPMENT	4/318	19/17799	0.00031346	0.0062293	0.00485937	SRGN/DDR2/ECM1/PHEX	4
GO_BP_MM_LUNG_ALVEOLUS_DEVELOPMENT	GO_BP_MM_LUNG_ALVEOLUS_DEVELOPMENT	5/318	34/17799	0.000320747	0.00626029	0.00488355	ADA/BMP4/STRA6/LIF/TCF21	5
GO_BP_MM_KIDNEY_DEVELOPMENT	GO_BP_MM_KIDNEY_DEVELOPMENT	8/318	100/17799	0.000425696	0.00802217	0.00625796	SERPINF1/SHH/SULF1/DCN/ACE/BMP4/STRA6/TCF21	8
GO_BP_MM_RESPONSE_TO_ESTRADIOL_STIMULUS	GO_BP_MM_RESPONSE_TO_ESTRADIOL_STIMULUS	8/318	100/17799	0.000425696	0.00802217	0.00625796	SHH/BMP4/ANXA1/PDGFRA/ADCYAP1R1/ETS1/PTGS2/NPY1R	8
GO_BP_MM_REGULATION_OF_CELL_PROLIFERATION	GO_BP_MM_REGULATION_OF_CELL_PROLIFERATION	9/318	130/17799	0.000550455	0.0101974	0.00795483	SHH/TBX3/MMP7/CSF2/ANXA1/IL6/PTGS2/FA2H/EGLN3	9
GO_BP_MM_PEPTIDE_CROSS-LINKING	GO_BP_MM_PEPTIDE_CROSS-LINKING	4/318	22/17799	0.000567097	0.0103306	0.00805875	ANXA1/COL3A1/IVL/SPRR1A	4
GO_MF_MM_CARBOHYDRATE_BINDING	GO_MF_MM_CARBOHYDRATE_BINDING	12/318	219/17799	0.000597715	0.0107099	0.0083546	CD34/MRC2/VCAN/CLEC3B/UGT2B35/COLEC12/ITLN1/CLEC4A1/LGALS3/UGT2B5/UGT2B36/THBD	12
GO_CC_MM_MEMBRANE-BOUNDED_VESICLE	GO_CC_MM_MEMBRANE-BOUNDED_VESICLE	3/318	10/17799	0.000617615	0.010888	0.00849352	BMP4/SYT8/BMP5	3
GO_BP_MM_POSITIVE_REGULATION_OF_GENE_EXPRESSION	GO_BP_MM_POSITIVE_REGULATION_OF_GENE_EXPRESSION	10/318	162/17799	0.000679712	0.0117925	0.00919911	SHH/CD44/CD34/CSF2/BMP4/WNT7B/IL6/MYLK2/TNC/LRRC32	10
GO_BP_MM_POSITIVE_REGULATION_OF_SMOOTH_MUSCLE_CELL_PROLIFERATION	GO_BP_MM_POSITIVE_REGULATION_OF_SMOOTH_MUSCLE_CELL_PROLIFERATION	5/318	40/17799	0.000694954	0.0118685	0.00925843	SULF1/BMP4/IL6/IL6RA/PTGS2	5
GO_BP_MM_RESPONSE_TO_DRUG	GO_BP_MM_RESPONSE_TO_DRUG	15/318	322/17799	0.000718893	0.0120885	0.00943002	SLC1A2/LPL/GPX3/MMP7/APOD/ANXA1/CYP2E1/IL6/ADCYAP1R1/VEGFC/CYP1A1/PTGS2/CCL2/ABCC8/TNFRSF11B	15
GO_MF_MM_CYTOKINE_ACTIVITY	GO_MF_MM_CYTOKINE_ACTIVITY	10/318	164/17799	0.000747477	0.0123787	0.00965641	CSF2/BMP4/FAM3B/IL6/CCL20/IL1F6/PGLYRP1/BMP5/LIF/CSF3	10
GO_BP_MM_NEGATIVE_REGULATION_OF_WNT_RECEPTOR_SIGNALING_PATHWAY	GO_BP_MM_NEGATIVE_REGULATION_OF_WNT_RECEPTOR_SIGNALING_PATHWAY	5/318	41/17799	0.000780036	0.0125379	0.00978064	SHH/WIF1/DKK2/DKK3/HIC1	5
GO_BP_MM_SKELETAL_SYSTEM_MORPHOGENESIS	GO_BP_MM_SKELETAL_SYSTEM_MORPHOGENESIS	5/318	41/17799	0.000780036	0.0125379	0.00978064	TBX4/COL1A1/PDGFRA/MMP2/HHIP	5
GO_CC_MM_NUCLEAR_ENVELOPE_LUMEN	GO_CC_MM_NUCLEAR_ENVELOPE_LUMEN	3/318	11/17799	0.000838015	0.0132746	0.0103553	FAM3B/ALOX5/PTGES	3
GO_BP_MM_CELL_GROWTH	GO_BP_MM_CELL_GROWTH	5/318	42/17799	0.000872655	0.0136259	0.0106293	IL6/IL6RA/EMP1/EMP3/NDNF	5
GO_BP_MM_NEGATIVE_REGULATION_OF_CELL_MIGRATION	GO_BP_MM_NEGATIVE_REGULATION_OF_CELL_MIGRATION	6/318	63/17799	0.000895906	0.0137919	0.0107588	SHH/SULF1/DPEP1/ENG/PODN/THY1	6
GO_BP_MM_POSITIVE_REGULATION_OF_PEPTIDYL-TYROSINE_PHOSPHORYLATION	GO_BP_MM_POSITIVE_REGULATION_OF_PEPTIDYL-TYROSINE_PHOSPHORYLATION	6/318	64/17799	0.00097398	0.0147691	0.0115211	CD44/THBS4/IL6/IL6RA/HGF/LIF	6
GO_MF_MM_GROWTH_FACTOR_ACTIVITY	GO_MF_MM_GROWTH_FACTOR_ACTIVITY	9/318	141/17799	0.000986409	0.0147691	0.0115211	CSF2/THBS4/BMP4/IL6/HGF/VEGFC/BMP5/LIF/CSF3	9
GO_MF_MM_METALLOPEPTIDASE_ACTIVITY	GO_MF_MM_METALLOPEPTIDASE_ACTIVITY	7/318	88/17799	0.00100244	0.0148063	0.0115501	ADAMTS4/MMP7/ACE/CPXM1/MMP2/NAALAD2/PHEX	7
GO_BP_MM_NEGATIVE_REGULATION_OF_CYTOKINE_SECRETION	GO_BP_MM_NEGATIVE_REGULATION_OF_CYTOKINE_SECRETION	3/318	12/17799	0.00110262	0.0160689	0.0125351	SRGN/IL6/LRRC32	3
GO_BP_MM_POSITIVE_REGULATION_OF_ENDOTHELIAL_CELL_PROLIFERATION	GO_BP_MM_POSITIVE_REGULATION_OF_ENDOTHELIAL_CELL_PROLIFERATION	5/318	45/17799	0.00119985	0.0172557	0.0134609	CCL11/THBS4/BMP4/ECM1/CCL2	5
GO_BP_MM_NEGATIVE_REGULATION_OF_HORMONE_SECRETION	GO_BP_MM_NEGATIVE_REGULATION_OF_HORMONE_SECRETION	3/318	13/17799	0.00141453	0.0200789	0.0156633	IL6/LIF/NPY1R	3
GO_CC_MM_MEMBRANE_RAFT	GO_CC_MM_MEMBRANE_RAFT	9/318	149/17799	0.00145303	0.0203611	0.0158833	SHH/CLIP3/SULF1/RGS16/MALL/TNFRSF1B/EDNRA/THY1/ITLN1	9
GO_CC_MM_EXTERNAL_SIDE_OF_PLASMA_MEMBRANE	GO_CC_MM_EXTERNAL_SIDE_OF_PLASMA_MEMBRANE	11/318	213/17799	0.00161129	0.0219961	0.0171588	CD44/CD34/ADA/ACE/ABCG1/IL6/CD55/ENG/SCNN1B/CDH13/THY1	11
GO_BP_MM_AGING	GO_BP_MM_AGING	8/318	123/17799	0.00165618	0.0219961	0.0171588	SERPINF1/ADA/DCN/APOD/IL6/ADM/EDNRA/CCL2	8
GO_BP_MM_RESPONSE_TO_ORGANIC_SUBSTANCE	GO_BP_MM_RESPONSE_TO_ORGANIC_SUBSTANCE	7/318	96/17799	0.00166778	0.0219961	0.0171588	GPX3/ABCG1/PDGFRA/ADM/CDH13/CYP1A1/PTGS2	7
GO_BP_MM_FACE_MORPHOGENESIS	GO_BP_MM_FACE_MORPHOGENESIS	4/318	29/17799	0.00166888	0.0219961	0.0171588	COL1A1/PDGFRA/MMP2/STRA6	4
GO_BP_MM_NEGATIVE_REGULATION_OF_APOPTOTIC_PROCESS	GO_BP_MM_NEGATIVE_REGULATION_OF_APOPTOTIC_PROCESS	14/318	315/17799	0.00167034	0.0219961	0.0171588	AXL/SHH/CD44/ADA/TBX3/CSF2/DPEP1/PIK3CG/BMP4/ANXA1/IL6/HGF/EDNRA/SNAI1	14
GO_BP_MM_CARDIAC_MUSCLE_TISSUE_MORPHOGENESIS	GO_BP_MM_CARDIAC_MUSCLE_TISSUE_MORPHOGENESIS	3/318	14/17799	0.00177661	0.0231171	0.0180333	ZFPM2/MYLK2/TBX20	3
GO_BP_MM_GLUTATHIONE_METABOLIC_PROCESS	GO_BP_MM_GLUTATHIONE_METABOLIC_PROCESS	4/318	30/17799	0.00189884	0.024133	0.0188257	GPX3/GSTA4/GSTP2/GSTA1	4
GO_BP_MM_PITUITARY_GLAND_DEVELOPMENT	GO_BP_MM_PITUITARY_GLAND_DEVELOPMENT	4/318	30/17799	0.00189884	0.024133	0.0188257	GATA2/BMP4/GLI1/ETS1	4
GO_MF_MM_CARBOXYLESTERASE_ACTIVITY	GO_MF_MM_CARBOXYLESTERASE_ACTIVITY	5/318	50/17799	0.00193511	0.0243112	0.0189648	ACHE/CES1F/CES2E/CES1G/CES2C	5
GO_BP_MM_EPITHELIAL_TUBE_BRANCHING_INVOLVED_IN_LUNG_MORPHOGENESIS	GO_BP_MM_EPITHELIAL_TUBE_BRANCHING_INVOLVED_IN_LUNG_MORPHOGENESIS	3/318	15/17799	0.00219157	0.0269144	0.0209955	SHH/BMP4/HHIP	3
GO_BP_MM_POSITIVE_REGULATION_OF_T_CELL_ACTIVATION	GO_BP_MM_POSITIVE_REGULATION_OF_T_CELL_ACTIVATION	3/318	15/17799	0.00219157	0.0269144	0.0209955	ADA/THY1/CCL2	3
GO_BP_MM_POSITIVE_REGULATION_OF_ERK1_AND_ERK2_CASCADE	GO_BP_MM_POSITIVE_REGULATION_OF_ERK1_AND_ERK2_CASCADE	6/318	76/17799	0.00237642	0.0288602	0.0225134	CD44/BMP4/IL6/NTRK1/PDGFRA/EDNRA	6
GO_BP_MM_CELLULAR_RESPONSE_TO_RETINOIC_ACID	GO_BP_MM_CELLULAR_RESPONSE_TO_RETINOIC_ACID	4/318	32/17799	0.00242281	0.0291004	0.0227007	COL1A1/WNT7B/RET/EPHA3	4
GO_BP_MM_DEFENSE_RESPONSE_TO_GRAM-NEGATIVE_BACTERIUM	GO_BP_MM_DEFENSE_RESPONSE_TO_GRAM-NEGATIVE_BACTERIUM	3/318	16/17799	0.00266188	0.0316243	0.0246696	MMP7/IL6/IL6RA	3
GO_BP_MM_OUTFLOW_TRACT_MORPHOGENESIS	GO_BP_MM_OUTFLOW_TRACT_MORPHOGENESIS	4/318	33/17799	0.0027187	0.0319521	0.0249253	TBX3/ZFPM2/TBX20/NPY1R	4
GO_BP_MM_POSITIVE_REGULATION_OF_CELL_MIGRATION	GO_BP_MM_POSITIVE_REGULATION_OF_CELL_MIGRATION	7/318	107/17799	0.00309121	0.0359434	0.0280389	COL1A1/CCL11/PDGFRA/RET/ETS1/SNAI1/ZFP703	7
GO_BP_MM_EMBRYONIC_DIGESTIVE_TRACT_DEVELOPMENT	GO_BP_MM_EMBRYONIC_DIGESTIVE_TRACT_DEVELOPMENT	3/318	17/17799	0.00318986	0.0359434	0.0280389	RARRES2/ADA/STRA6	3
GO_CC_MM_BASAL_LAMINA	GO_CC_MM_BASAL_LAMINA	3/318	17/17799	0.00318986	0.0359434	0.0280389	NID1/LAMA2/ACHE	3
GO_MF_MM_EXTRACELLULAR_MATRIX_BINDING	GO_MF_MM_EXTRACELLULAR_MATRIX_BINDING	3/318	17/17799	0.00318986	0.0359434	0.0280389	NID1/DCN/TGFBI	3
GO_BP_MM_RESPONSE_TO_CYTOKINE_STIMULUS	GO_BP_MM_RESPONSE_TO_CYTOKINE_STIMULUS	6/318	81/17799	0.00327603	0.0365378	0.0285025	IL6/COL3A1/IL6RA/PDGFRA/PTGS2/EPHA3	6
GO_BP_MM_RESPONSE_TO_ANTIBIOTIC	GO_BP_MM_RESPONSE_TO_ANTIBIOTIC	4/318	35/17799	0.0033829	0.0370935	0.028936	IL6/ETS1/CYP1A1/CCL2	4
GO_BP_MM_WNT_RECEPTOR_SIGNALING_PATHWAY	GO_BP_MM_WNT_RECEPTOR_SIGNALING_PATHWAY	8/318	138/17799	0.00339373	0.0370935	0.028936	CD44/WIF1/NKD2/WNT7B/DKK3/NKD1/KREMEN2/HIC1	8
GO_BP_MM_ODONTOGENESIS_OF_DENTIN-CONTAINING_TOOTH	GO_BP_MM_ODONTOGENESIS_OF_DENTIN-CONTAINING_TOOTH	5/318	57/17799	0.0034557	0.0373969	0.0291727	SHH/BMP4/WNT7B/PDGFRA/ADM	5
GO_BP_MM_ORGAN_REGENERATION	GO_BP_MM_ORGAN_REGENERATION	5/318	58/17799	0.00372747	0.0393233	0.0306755	LCP1/HGF/ADM/LIF/CCL2	5
GO_BP_MM_PATTERNING_OF_BLOOD_VESSELS	GO_BP_MM_PATTERNING_OF_BLOOD_VESSELS	4/318	36/17799	0.00375301	0.0393233	0.0306755	SHH/ENG/EDNRA/TBX20	4
GO_BP_MM_POSITIVE_REGULATION_OF_DNA_REPLICATION	GO_BP_MM_POSITIVE_REGULATION_OF_DNA_REPLICATION	4/318	36/17799	0.00375301	0.0393233	0.0306755	CSF2/GLI1/IL6/PDGFRA	4
GO_BP_MM_SMOOTH_MUSCLE_CELL_DIFFERENTIATION	GO_BP_MM_SMOOTH_MUSCLE_CELL_DIFFERENTIATION	3/318	18/17799	0.00377763	0.0393233	0.0306755	BMP4/WNT7B/TMEM204	3
GO_BP_MM_NEGATIVE_REGULATION_OF_CELL_PROLIFERATION	GO_BP_MM_NEGATIVE_REGULATION_OF_CELL_PROLIFERATION	12/318	274/17799	0.00394186	0.0406458	0.0317071	IGFBP3/BMP4/IL6/DPT/NTRK1/PODN/RERG/ADM/BMP5/PTGS2/LIF/PTGES	12
GO_BP_MM_VASCULOGENESIS	GO_BP_MM_VASCULOGENESIS	5/318	60/17799	0.00431639	0.0440918	0.0343953	SHH/ZFPM2/ENG/ADM/SOX18	5
GO_BP_MM_EMBRYONIC_ORGAN_DEVELOPMENT	GO_BP_MM_EMBRYONIC_ORGAN_DEVELOPMENT	3/318	19/17799	0.00442716	0.0443935	0.0346306	SHH/ZFPM2/WNT7B	3
GO_BP_MM_POSITIVE_REGULATION_OF_TYROSINE_PHOSPHORYLATION_OF_STAT3_PROTEIN	GO_BP_MM_POSITIVE_REGULATION_OF_TYROSINE_PHOSPHORYLATION_OF_STAT3_PROTEIN	3/318	19/17799	0.00442716	0.0443935	0.0346306	IL6/IL6RA/LIF	3
GO_BP_MM_HEART_LOOPING	GO_BP_MM_HEART_LOOPING	4/318	38/17799	0.0045736	0.0450193	0.0351188	SHH/TBX3/ENG/TBX20	4
GO_BP_MM_REGULATION_OF_CELL_GROWTH	GO_BP_MM_REGULATION_OF_CELL_GROWTH	4/318	38/17799	0.0045736	0.0450193	0.0351188	IGFBP3/IGFBP6/CDH13/NDN	4
GO_MF_MM_IRON_ION_BINDING	GO_MF_MM_IRON_ION_BINDING	10/318	210/17799	0.00461314	0.0450193	0.0351188	PTGIS/CYGB/ALOXE3/CYP2E1/ALOX5/CYP1A1/FA2H/EGLN3/CYP2F2/CYP2C68	10
GO_BP_MM_RESPONSE_TO_ORGANIC_CYCLIC_COMPOUND	GO_BP_MM_RESPONSE_TO_ORGANIC_CYCLIC_COMPOUND	8/318	147/17799	0.00496942	0.0480196	0.0374593	GPX3/BMP4/ANXA1/IL6/EDNRA/CYP1A1/PTGS2/LUM	8
GO_BP_MM_EMBRYONIC_SKELETAL_SYSTEM_DEVELOPMENT	GO_BP_MM_EMBRYONIC_SKELETAL_SYSTEM_DEVELOPMENT	4/318	39/17799	0.00502578	0.0480196	0.0374593	COL1A1/SHH/SULF1/BMP4	4
GO_BP_MM_EMBRYONIC_DIGESTIVE_TRACT_MORPHOGENESIS	GO_BP_MM_EMBRYONIC_DIGESTIVE_TRACT_MORPHOGENESIS	3/318	20/17799	0.00514025	0.0480196	0.0374593	SHH/PDGFRA/TCF21	3
GO_BP_MM_POSITIVE_REGULATION_OF_EPITHELIAL_TO_MESENCHYMAL_TRANSITION	GO_BP_MM_POSITIVE_REGULATION_OF_EPITHELIAL_TO_MESENCHYMAL_TRANSITION	3/318	20/17799	0.00514025	0.0480196	0.0374593	COL1A1/SNAI1/ZFP703	3
GO_MF_MM_HYALURONIC_ACID_BINDING	GO_MF_MM_HYALURONIC_ACID_BINDING	3/318	20/17799	0.00514025	0.0480196	0.0374593	CD44/VCAN/TNFAIP6	3
GO_BP_MM_PALATE_DEVELOPMENT	GO_BP_MM_PALATE_DEVELOPMENT	5/318	63/17799	0.00531991	0.0492768	0.03844	SHH/TBX3/PDGFRA/SNAI1/TCF21	5
GO_BP_MM_SMOOTHENED_SIGNALING_PATHWAY	GO_BP_MM_SMOOTHENED_SIGNALING_PATHWAY	4/318	40/17799	0.00550698	0.0505809	0.0394574	SHH/BMP4/GLI1/HHIP	4
GO_BP_MM_BONE_DEVELOPMENT	GO_BP_MM_BONE_DEVELOPMENT	3/318	21/17799	0.00591853	0.0525931	0.041027	SULF1/BMP4/PAPSS2	3
GO_BP_MM_CELL_CHEMOTAXIS	GO_BP_MM_CELL_CHEMOTAXIS	3/318	21/17799	0.00591853	0.0525931	0.041027	ENG/HGF/PDGFRA	3
GO_BP_MM_RESPONSE_TO_HYPEROXIA	GO_BP_MM_RESPONSE_TO_HYPEROXIA	3/318	21/17799	0.00591853	0.0525931	0.041027	ALOX5/PDGFRA/CYP1A1	3
GO_MF_MM_CARBOXYPEPTIDASE_ACTIVITY	GO_MF_MM_CARBOXYPEPTIDASE_ACTIVITY	3/318	21/17799	0.00591853	0.0525931	0.041027	AEBP1/ACE/NAALAD2	3
GO_MF_MM_METALLOCARBOXYPEPTIDASE_ACTIVITY	GO_MF_MM_METALLOCARBOXYPEPTIDASE_ACTIVITY	3/318	22/17799	0.00676349	0.0596169	0.0465062	AEBP1/CPXM1/CPZ	3
GO_BP_MM_CARTILAGE_DEVELOPMENT	GO_BP_MM_CARTILAGE_DEVELOPMENT	5/318	67/17799	0.00690054	0.0603383	0.0470689	CD44/SULF1/MGP/BMP5/LUM	5
GO_BP_MM_BRANCHING_INVOLVED_IN_URETERIC_BUD_MORPHOGENESIS	GO_BP_MM_BRANCHING_INVOLVED_IN_URETERIC_BUD_MORPHOGENESIS	4/318	43/17799	0.00713258	0.0618723	0.0482656	SHH/CD44/BMP4/TCF21	4
GO_BP_MM_BONE_MINERALIZATION	GO_BP_MM_BONE_MINERALIZATION	3/318	23/17799	0.00767648	0.0650418	0.0507381	ASPN/CLEC3B/PTGS2	3
GO_BP_MM_POSITIVE_REGULATION_OF_PATHWAY-RESTRICTED_SMAD_PROTEIN_PHOSPHORYLATION	GO_BP_MM_POSITIVE_REGULATION_OF_PATHWAY-RESTRICTED_SMAD_PROTEIN_PHOSPHORYLATION	3/318	23/17799	0.00767648	0.0650418	0.0507381	BMP4/ENG/BMP5	3
GO_BP_MM_PROTEIN_LOCALIZATION_TO_NUCLEUS	GO_BP_MM_PROTEIN_LOCALIZATION_TO_NUCLEUS	3/318	23/17799	0.00767648	0.0650418	0.0507381	COL1A1/SHH/BMP4	3
GO_BP_MM_DEFENSE_RESPONSE_TO_GRAM-POSITIVE_BACTERIUM	GO_BP_MM_DEFENSE_RESPONSE_TO_GRAM-POSITIVE_BACTERIUM	4/318	44/17799	0.00773763	0.0650556	0.0507488	MMP7/IL6/IL6RA/PGLYRP1	4
GO_MF_MM_ENZYME_BINDING	GO_MF_MM_ENZYME_BINDING	9/318	193/17799	0.00802784	0.0669804	0.0522503	SLPI/CYP2E1/IL6RA/ECM1/THY1/CYP1A1/PTGS2/MST1R/CSF3	9
GO_BP_MM_POSITIVE_REGULATION_OF_NEURON_DIFFERENTIATION	GO_BP_MM_POSITIVE_REGULATION_OF_NEURON_DIFFERENTIATION	5/318	70/17799	0.00828286	0.0685846	0.0535017	SHH/BMP4/IL6/DUOXA1/NBL1	5
GO_BP_MM_CARDIAC_MUSCLE_CELL_DIFFERENTIATION	GO_BP_MM_CARDIAC_MUSCLE_CELL_DIFFERENTIATION	3/318	24/17799	0.0086587	0.0701034	0.0546865	TBX3/BMP4/MYLK2	3
GO_BP_MM_RESPONSE_TO_INORGANIC_SUBSTANCE	GO_BP_MM_RESPONSE_TO_INORGANIC_SUBSTANCE	3/318	24/17799	0.0086587	0.0701034	0.0546865	COL1A1/PDGFRA/TNFRSF11B	3
GO_BP_MM_RESPONSE_TO_MORPHINE	GO_BP_MM_RESPONSE_TO_MORPHINE	3/318	24/17799	0.0086587	0.0701034	0.0546865	ADA/EDNRA/PRKCG	3
GO_BP_MM_NEGATIVE_REGULATION_OF_INFLAMMATORY_RESPONSE	GO_BP_MM_NEGATIVE_REGULATION_OF_INFLAMMATORY_RESPONSE	4/318	46/17799	0.00904677	0.072547	0.0565928	SERPINF1/ADA/PTGIS/TNFRSF1B	4
GO_BP_MM_POSITIVE_REGULATION_OF_PROTEIN_PHOSPHORYLATION	GO_BP_MM_POSITIVE_REGULATION_OF_PROTEIN_PHOSPHORYLATION	6/318	100/17799	0.00909327	0.072547	0.0565928	CLIP3/BMP4/ENG/EDNRA/ITLN1/FNDC1	6
GO_BP_MM_WOUND_HEALING	GO_BP_MM_WOUND_HEALING	5/318	72/17799	0.00930431	0.0736928	0.0574866	DCN/COL3A1/ENG/PDGFRA/FMOD	5
GO_BP_MM_LIMB_MORPHOGENESIS	GO_BP_MM_LIMB_MORPHOGENESIS	3/318	25/17799	0.00971123	0.0755969	0.0589719	TBX4/TBX3/FBN2	3
GO_BP_MM_POSITIVE_REGULATION_OF_VASOCONSTRICTION	GO_BP_MM_POSITIVE_REGULATION_OF_VASOCONSTRICTION	3/318	25/17799	0.00971123	0.0755969	0.0589719	ALOX5/PTGS2/NPY1R	3
GO_BP_MM_POSITIVE_REGULATION_OF_OSTEOBLAST_DIFFERENTIATION	GO_BP_MM_POSITIVE_REGULATION_OF_OSTEOBLAST_DIFFERENTIATION	4/318	47/17799	0.00975221	0.0755969	0.0589719	BMP4/WNT7B/FBN2/DDR2	4
GO_BP_MM_NERVOUS_SYSTEM_DEVELOPMENT	GO_BP_MM_NERVOUS_SYSTEM_DEVELOPMENT	8/318	168/17799	0.0107815	0.0805623	0.0628453	SLC1A2/THBS4/GFRA2/ITGA8/NTRK1/RET/SEMA3D/NBL1	8
GO_BP_MM_ADRENAL_GLAND_DEVELOPMENT	GO_BP_MM_ADRENAL_GLAND_DEVELOPMENT	3/318	26/17799	0.010835	0.0805623	0.0628453	PDGFRA/DKK3/STRA6	3
GO_BP_MM_CELLULAR_RESPONSE_TO_HYDROGEN_PEROXIDE	GO_BP_MM_CELLULAR_RESPONSE_TO_HYDROGEN_PEROXIDE	3/318	26/17799	0.010835	0.0805623	0.0628453	ANXA1/IL6/ETS1	3
GO_BP_MM_HAIR_FOLLICLE_MORPHOGENESIS	GO_BP_MM_HAIR_FOLLICLE_MORPHOGENESIS	3/318	26/17799	0.010835	0.0805623	0.0628453	SHH/RUNX1/SNAI1	3
GO_BP_MM_ODONTOGENESIS	GO_BP_MM_ODONTOGENESIS	3/318	26/17799	0.010835	0.0805623	0.0628453	SHH/BMP4/FMOD	3
GO_MF_MM_ASPARTIC-TYPE_ENDOPEPTIDASE_ACTIVITY	GO_MF_MM_ASPARTIC-TYPE_ENDOPEPTIDASE_ACTIVITY	3/318	26/17799	0.010835	0.0805623	0.0628453	NAPSA/PGC/ASPRV1	3
GO_BP_MM_LIPID_GLYCOSYLATION	GO_BP_MM_LIPID_GLYCOSYLATION	3/318	27/17799	0.0120308	0.0868616	0.0677593	UGT2B35/UGT2B5/UGT2B36	3
GO_BP_MM_NEGATIVE_REGULATION_OF_CELL_DEATH	GO_BP_MM_NEGATIVE_REGULATION_OF_CELL_DEATH	3/318	27/17799	0.0120308	0.0868616	0.0677593	BMP4/ZFPM2/ADCYAP1R1	3
GO_BP_MM_POSITIVE_REGULATION_OF_BMP_SIGNALING_PATHWAY	GO_BP_MM_POSITIVE_REGULATION_OF_BMP_SIGNALING_PATHWAY	3/318	27/17799	0.0120308	0.0868616	0.0677593	SULF1/BMP4/ENG	3
GO_CC_MM_CELL_PERIPHERY	GO_CC_MM_CELL_PERIPHERY	3/318	27/17799	0.0120308	0.0868616	0.0677593	NID1/CD34/SPRR1A	3
GO_BP_MM_DORSAL_VENTRAL_PATTERN_FORMATION	GO_BP_MM_DORSAL_VENTRAL_PATTERN_FORMATION	4/318	50/17799	0.0120796	0.0868616	0.0677593	SHH/GLI1/TBX20/HHIP	4
GO_BP_MM_CELLULAR_RESPONSE_TO_GROWTH_FACTOR_STIMULUS	GO_BP_MM_CELLULAR_RESPONSE_TO_GROWTH_FACTOR_STIMULUS	4/318	51/17799	0.0129276	0.0889761	0.0694088	COL1A1/DDC/BMP4/NTRK1	4
GO_BP_MM_OSTEOBLAST_DIFFERENTIATION	GO_BP_MM_OSTEOBLAST_DIFFERENTIATION	4/318	51/17799	0.0129276	0.0889761	0.0694088	COL1A1/BMP4/GLI1/SNAI1	4
GO_BP_MM_DRUG_METABOLIC_PROCESS	GO_BP_MM_DRUG_METABOLIC_PROCESS	2/318	10/17799	0.0130249	0.0889761	0.0694088	CYP2E1/CYP1A1	2
GO_BP_MM_NERVE_GROWTH_FACTOR_RECEPTOR_SIGNALING_PATHWAY	GO_BP_MM_NERVE_GROWTH_FACTOR_RECEPTOR_SIGNALING_PATHWAY	2/318	10/17799	0.0130249	0.0889761	0.0694088	NTRK1/NDN	2
GO_BP_MM_OUTFLOW_TRACT_SEPTUM_MORPHOGENESIS	GO_BP_MM_OUTFLOW_TRACT_SEPTUM_MORPHOGENESIS	2/318	10/17799	0.0130249	0.0889761	0.0694088	ZFPM2/TBX20	2
GO_BP_MM_REGULATION_OF_EPITHELIAL_CELL_PROLIFERATION	GO_BP_MM_REGULATION_OF_EPITHELIAL_CELL_PROLIFERATION	2/318	10/17799	0.0130249	0.0889761	0.0694088	EDNRA/SERPINB5	2
GO_BP_MM_TYPE_B_PANCREATIC_CELL_DEVELOPMENT	GO_BP_MM_TYPE_B_PANCREATIC_CELL_DEVELOPMENT	2/318	10/17799	0.0130249	0.0889761	0.0694088	BMP4/BMP5	2
GO_BP_MM_VASCULOGENESIS_INVOLVED_IN_CORONARY_VASCULAR_MORPHOGENESIS	GO_BP_MM_VASCULOGENESIS_INVOLVED_IN_CORONARY_VASCULAR_MORPHOGENESIS	2/318	10/17799	0.0130249	0.0889761	0.0694088	SHH/ZFPM2	2
GO_MF_MM_HEME_BINDING	GO_MF_MM_HEME_BINDING	8/318	175/17799	0.0135388	0.0919123	0.0716993	PTGIS/CYGB/CYP2E1/CYP1A1/PTGS2/FA2H/CYP2F2/CYP2C68	8
GO_BP_MM_NEGATIVE_REGULATION_OF_FAT_CELL_DIFFERENTIATION	GO_BP_MM_NEGATIVE_REGULATION_OF_FAT_CELL_DIFFERENTIATION	3/318	29/17799	0.0146415	0.0981786	0.0765875	GATA2/TRIB2/ZFPM2	3
GO_BP_MM_NEURON_FATE_COMMITMENT	GO_BP_MM_NEURON_FATE_COMMITMENT	3/318	29/17799	0.0146415	0.0981786	0.0765875	SHH/GATA2/BMP4	3
GO_MF_MM_MONOOXYGENASE_ACTIVITY	GO_MF_MM_MONOOXYGENASE_ACTIVITY	4/318	54/17799	0.0156963	0.101753	0.0793757	PTGIS/CYP2E1/CYP1A1/CYP2C68	4
GO_BP_MM_LUNG-ASSOCIATED_MESENCHYME_DEVELOPMENT	GO_BP_MM_LUNG-ASSOCIATED_MESENCHYME_DEVELOPMENT	2/318	11/17799	0.0157331	0.101753	0.0793757	SHH/WNT7B	2
GO_BP_MM_MACROPHAGE_DIFFERENTIATION	GO_BP_MM_MACROPHAGE_DIFFERENTIATION	2/318	11/17799	0.0157331	0.101753	0.0793757	SPIB/BMP4	2
GO_BP_MM_NEGATIVE_REGULATION_OF_DNA_DAMAGE_RESPONSE_SIGNAL_TRANSDUCTION_BY_P53_CLASS_MEDIATOR	GO_BP_MM_NEGATIVE_REGULATION_OF_DNA_DAMAGE_RESPONSE_SIGNAL_TRANSDUCTION_BY_P53_CLASS_MEDIATOR	2/318	11/17799	0.0157331	0.101753	0.0793757	CD44/SNAI1	2
GO_BP_MM_NEGATIVE_REGULATION_OF_MYOBLAST_DIFFERENTIATION	GO_BP_MM_NEGATIVE_REGULATION_OF_MYOBLAST_DIFFERENTIATION	2/318	11/17799	0.0157331	0.101753	0.0793757	TBX3/BMP4	2
GO_BP_MM_RESPONSE_TO_ARSENIC-CONTAINING_SUBSTANCE	GO_BP_MM_RESPONSE_TO_ARSENIC-CONTAINING_SUBSTANCE	2/318	11/17799	0.0157331	0.101753	0.0793757	CYP1A1/TNFRSF11B	2
GO_BP_MM_NEUTROPHIL_CHEMOTAXIS	GO_BP_MM_NEUTROPHIL_CHEMOTAXIS	3/318	30/17799	0.0160573	0.103239	0.0805351	CXCL3/CCL2/CXCL2	3
GO_MF_MM_INTEGRIN_BINDING	GO_MF_MM_INTEGRIN_BINDING	4/318	55/17799	0.0166956	0.106572	0.0831349	THBS4/COL3A1/GPNMB/THY1	4
GO_BP_MM_IN_UTERO_EMBRYONIC_DEVELOPMENT	GO_BP_MM_IN_UTERO_EMBRYONIC_DEVELOPMENT	9/318	218/17799	0.0167707	0.106572	0.0831349	RARRES2/ADA/TBX3/ZFPM2/WNT7B/RUNX1/PDGFRA/EDNRA/SOX18	9
GO_BP_MM_DEVELOPMENTAL_GROWTH	GO_BP_MM_DEVELOPMENTAL_GROWTH	3/318	31/17799	0.0175474	0.110863	0.0864824	SHH/ADM/STRA6	3
GO_BP_MM_ANDROGEN_METABOLIC_PROCESS	GO_BP_MM_ANDROGEN_METABOLIC_PROCESS	2/318	12/17799	0.0186591	0.112057	0.0874141	SHH/ADM	2
GO_BP_MM_DEFINITIVE_HEMOPOIESIS	GO_BP_MM_DEFINITIVE_HEMOPOIESIS	2/318	12/17799	0.0186591	0.112057	0.0874141	GATA2/RUNX1	2
GO_BP_MM_HEAD_DEVELOPMENT	GO_BP_MM_HEAD_DEVELOPMENT	2/318	12/17799	0.0186591	0.112057	0.0874141	EDNRA/STRA6	2
GO_BP_MM_LYMPH_VESSEL_DEVELOPMENT	GO_BP_MM_LYMPH_VESSEL_DEVELOPMENT	2/318	12/17799	0.0186591	0.112057	0.0874141	TMEM204/SOX18	2
GO_BP_MM_NEGATIVE_REGULATION_OF_BONE_MINERALIZATION	GO_BP_MM_NEGATIVE_REGULATION_OF_BONE_MINERALIZATION	2/318	12/17799	0.0186591	0.112057	0.0874141	SRGN/ECM1	2
GO_BP_MM_POSITIVE_REGULATION_OF_CELLULAR_COMPONENT_MOVEMENT	GO_BP_MM_POSITIVE_REGULATION_OF_CELLULAR_COMPONENT_MOVEMENT	2/318	12/17799	0.0186591	0.112057	0.0874141	MYLK2/ETS1	2
GO_BP_MM_POSITIVE_REGULATION_OF_HEART_RATE	GO_BP_MM_POSITIVE_REGULATION_OF_HEART_RATE	2/318	12/17799	0.0186591	0.112057	0.0874141	ADA/ADM	2
GO_BP_MM_SODIUM_ION_TRANSMEMBRANE_TRANSPORT	GO_BP_MM_SODIUM_ION_TRANSMEMBRANE_TRANSPORT	2/318	12/17799	0.0186591	0.112057	0.0874141	TRPM5/SCNN1B	2
GO_MF_MM_DIPEPTIDASE_ACTIVITY	GO_MF_MM_DIPEPTIDASE_ACTIVITY	2/318	12/17799	0.0186591	0.112057	0.0874141	DPEP1/NAALAD2	2
GO_BP_MM_EMBRYONIC_LIMB_MORPHOGENESIS	GO_BP_MM_EMBRYONIC_LIMB_MORPHOGENESIS	4/318	57/17799	0.0188114	0.112354	0.0876459	TBX4/SHH/BMP4/FBN2	4
GO_BP_MM_NEURON_DEVELOPMENT	GO_BP_MM_NEURON_DEVELOPMENT	3/318	32/17799	0.019112	0.112916	0.0880838	RUNX1/NDN/LIF	3
GO_MF_MM_OXIDOREDUCTASE_ACTIVITYFLAVOPROTEIN_AS_ONE_DONOR_AND_INCORPORATION_OF_ONE_ATOM_OF_OXYGEN	GO_MF_MM_OXIDOREDUCTASE_ACTIVITYFLAVOPROTEIN_AS_ONE_DONOR_AND_INCORPORATION_OF_ONE_ATOM_OF_OXYGEN	3/318	32/17799	0.019112	0.112916	0.0880838	CYP2E1/CYP1A1/CYP2F2	3
GO_BP_MM_FEMALE_PREGNANCY	GO_BP_MM_FEMALE_PREGNANCY	4/318	58/17799	0.0199287	0.116772	0.0910917	GPX3/ADM/ETS1/THBD	4
GO_BP_MM_BRANCHING_MORPHOGENESIS_OF_A_TUBE	GO_BP_MM_BRANCHING_MORPHOGENESIS_OF_A_TUBE	3/318	33/17799	0.0207513	0.116772	0.0910917	SHH/BMP4/MGP	3
GO_BP_MM_NEURAL_CREST_CELL_MIGRATION	GO_BP_MM_NEURAL_CREST_CELL_MIGRATION	3/318	33/17799	0.0207513	0.116772	0.0910917	SHH/NRP2/RET	3
GO_BP_MM_POSITIVE_REGULATION_OF_CAMP_BIOSYNTHETIC_PROCESS	GO_BP_MM_POSITIVE_REGULATION_OF_CAMP_BIOSYNTHETIC_PROCESS	3/318	33/17799	0.0207513	0.116772	0.0910917	ADCYAP1R1/ADM/ADCY7	3
GO_BP_MM_POSITIVE_REGULATION_OF_EPITHELIAL_CELL_PROLIFERATION	GO_BP_MM_POSITIVE_REGULATION_OF_EPITHELIAL_CELL_PROLIFERATION	4/318	59/17799	0.0210862	0.116772	0.0910917	BMP4/IL6/VEGFC/BMP5	4
GO_BP_MM_POSITIVE_REGULATION_OF_PROTEIN_KINASE_B_SIGNALING_CASCADE	GO_BP_MM_POSITIVE_REGULATION_OF_PROTEIN_KINASE_B_SIGNALING_CASCADE	4/318	59/17799	0.0210862	0.116772	0.0910917	AXL/PIK3CG/IL6/MST1R	4
GO_MF_MM_OXIDOREDUCTASE_ACTIVITY_ACTING_ON_PAIRED_DONORS_WITH_INCORPORATION_OR_REDUCTION_OF_MOLECULAR_OXYGEN	GO_MF_MM_OXIDOREDUCTASE_ACTIVITY_ACTING_ON_PAIRED_DONORS_WITH_INCORPORATION_OR_REDUCTION_OF_MOLECULAR_OXYGEN	6/318	121/17799	0.021563	0.116772	0.0910917	PTGIS/CYP2E1/CYP1A1/EGLN3/CYP2F2/CYP2C68	6
GO_BP_MM_ARACHIDONIC_ACID_SECRETION	GO_BP_MM_ARACHIDONIC_ACID_SECRETION	2/318	13/17799	0.0217945	0.116772	0.0910917	ACE/ANXA1	2
GO_BP_MM_BRANCHING_INVOLVED_IN_MAMMARY_GLAND_DUCT_MORPHOGENESIS	GO_BP_MM_BRANCHING_INVOLVED_IN_MAMMARY_GLAND_DUCT_MORPHOGENESIS	2/318	13/17799	0.0217945	0.116772	0.0910917	TBX3/CCL11	2
GO_BP_MM_BRANCHING_INVOLVED_IN_SALIVARY_GLAND_MORPHOGENESIS	GO_BP_MM_BRANCHING_INVOLVED_IN_SALIVARY_GLAND_MORPHOGENESIS	2/318	13/17799	0.0217945	0.116772	0.0910917	SHH/IL6	2
GO_BP_MM_CELLULAR_RESPONSE_TO_FIBROBLAST_GROWTH_FACTOR_STIMULUS	GO_BP_MM_CELLULAR_RESPONSE_TO_FIBROBLAST_GROWTH_FACTOR_STIMULUS	2/318	13/17799	0.0217945	0.116772	0.0910917	CD44/CCL2	2
GO_BP_MM_MULTICELLULAR_ORGANISMAL_AGING	GO_BP_MM_MULTICELLULAR_ORGANISMAL_AGING	2/318	13/17799	0.0217945	0.116772	0.0910917	SLC1A2/DDC	2
GO_BP_MM_POSITIVE_REGULATION_OF_CHEMOKINE_PRODUCTION	GO_BP_MM_POSITIVE_REGULATION_OF_CHEMOKINE_PRODUCTION	2/318	13/17799	0.0217945	0.116772	0.0910917	IL6/IL6RA	2
GO_BP_MM_POSITIVE_REGULATION_OF_NEUTROPHIL_CHEMOTAXIS	GO_BP_MM_POSITIVE_REGULATION_OF_NEUTROPHIL_CHEMOTAXIS	2/318	13/17799	0.0217945	0.116772	0.0910917	THBS4/EDNRA	2
GO_BP_MM_REGULATION_OF_TRANSFORMING_GROWTH_FACTOR_BETA_RECEPTOR_SIGNALING_PATHWAY	GO_BP_MM_REGULATION_OF_TRANSFORMING_GROWTH_FACTOR_BETA_RECEPTOR_SIGNALING_PATHWAY	2/318	13/17799	0.0217945	0.116772	0.0910917	ENG/ZFP703	2
GO_BP_MM_RENAL_SYSTEM_DEVELOPMENT	GO_BP_MM_RENAL_SYSTEM_DEVELOPMENT	2/318	13/17799	0.0217945	0.116772	0.0910917	SHH/BMP4	2
GO_BP_MM_VASOCONSTRICTION	GO_BP_MM_VASOCONSTRICTION	2/318	13/17799	0.0217945	0.116772	0.0910917	ACE/EDNRA	2
GO_MF_MM_CHEMOATTRACTANT_ACTIVITY	GO_MF_MM_CHEMOATTRACTANT_ACTIVITY	2/318	13/17799	0.0217945	0.116772	0.0910917	BMP4/VEGFC	2
GO_MF_MM_SODIUM_CHANNEL_ACTIVITY	GO_MF_MM_SODIUM_CHANNEL_ACTIVITY	2/318	13/17799	0.0217945	0.116772	0.0910917	TRPM5/SCNN1B	2
GO_BP_MM_TRANSFORMING_GROWTH_FACTOR_BETA_RECEPTOR_SIGNALING_PATHWAY	GO_BP_MM_TRANSFORMING_GROWTH_FACTOR_BETA_RECEPTOR_SIGNALING_PATHWAY	4/318	60/17799	0.022284	0.118812	0.0926831	COL3A1/ENG/COL1A2/CCL2	4
GO_MF_MM_PEPTIDASE_INHIBITOR_ACTIVITY	GO_MF_MM_PEPTIDASE_INHIBITOR_ACTIVITY	3/318	34/17799	0.0224655	0.119198	0.0929844	SLPI/PI16/RECK	3
GO_BP_MM_RESPONSE_TO_AMINO_ACID_STIMULUS	GO_BP_MM_RESPONSE_TO_AMINO_ACID_STIMULUS	3/318	35/17799	0.0242545	0.127453	0.0994237	SLC1A2/IL6/CCL2	3
GO_MF_MM_PROTEIN_BINDING_BRIDGING	GO_MF_MM_PROTEIN_BINDING_BRIDGING	3/318	35/17799	0.0242545	0.127453	0.0994237	ANXA1/COL1A2/IVL	3
GO_BP_MM_CELL-CELL_SIGNALING	GO_BP_MM_CELL-CELL_SIGNALING	4/318	62/17799	0.0248021	0.129566	0.101072	SHH/WNT7B/FGFBP1/BHLHA15	4
GO_BP_MM_INTERMEDIATE_FILAMENT_ORGANIZATION	GO_BP_MM_INTERMEDIATE_FILAMENT_ORGANIZATION	2/318	14/17799	0.0251308	0.129566	0.101072	SHH/KRT20	2
GO_BP_MM_POSITIVE_REGULATION_OF_JAK-STAT_CASCADE	GO_BP_MM_POSITIVE_REGULATION_OF_JAK-STAT_CASCADE	2/318	14/17799	0.0251308	0.129566	0.101072	IL6/IL6RA	2
GO_BP_MM_POSITIVE_REGULATION_OF_RELEASE_OF_SEQUESTERED_CALCIUM_ION_INTO_CYTOSOL	GO_BP_MM_POSITIVE_REGULATION_OF_RELEASE_OF_SEQUESTERED_CALCIUM_ION_INTO_CYTOSOL	2/318	14/17799	0.0251308	0.129566	0.101072	EDNRA/THY1	2
GO_BP_MM_POSITIVE_REGULATION_OF_ANTI-APOPTOSIS	GO_BP_MM_POSITIVE_REGULATION_OF_ANTI-APOPTOSIS	3/318	36/17799	0.0261182	0.133422	0.104081	IL6/IL6RA/ADM	3
GO_MF_MM_OXIDOREDUCTASE_ACTIVITY_MOLECULAR_OXYGEN_INCORPORATION_OF_TWO_ATOMS_OF_OXYGEN	GO_MF_MM_OXIDOREDUCTASE_ACTIVITY_MOLECULAR_OXYGEN_INCORPORATION_OF_TWO_ATOMS_OF_OXYGEN	4/318	63/17799	0.026123	0.133422	0.104081	ALOXE3/ALOX5/PTGS2/EGLN3	4
GO_BP_MM_CHEMOTAXIS	GO_BP_MM_CHEMOTAXIS	4/318	64/17799	0.0274853	0.139727	0.108999	LSP1/PIK3CG/CCL20/RAC2	4
GO_BP_MM_CELLULAR_IRON_ION_HOMEOSTASIS	GO_BP_MM_CELLULAR_IRON_ION_HOMEOSTASIS	3/318	37/17799	0.0280566	0.141219	0.110163	LTF/HAMP/HAMP2	3
GO_BP_MM_POSITIVE_REGULATION_OF_MAP_KINASE_ACTIVITY	GO_BP_MM_POSITIVE_REGULATION_OF_MAP_KINASE_ACTIVITY	3/318	37/17799	0.0280566	0.141219	0.110163	PIK3CG/MST1R/CEACAM1	3
GO_BP_MM_CELL_PROLIFERATION	GO_BP_MM_CELL_PROLIFERATION	7/318	164/17799	0.0281663	0.141219	0.110163	SHH/CD34/TNFRSF1B/HGF/TBX20/CYP1A1/RASGRF1	7
GO_BP_MM_NEUROBLAST_PROLIFERATION	GO_BP_MM_NEUROBLAST_PROLIFERATION	2/318	15/17799	0.02866	0.141744	0.110572	SHH/HHIP	2
GO_BP_MM_POSITIVE_REGULATION_OF_SMOOTH_MUSCLE_CONTRACTION	GO_BP_MM_POSITIVE_REGULATION_OF_SMOOTH_MUSCLE_CONTRACTION	2/318	15/17799	0.02866	0.141744	0.110572	ADA/PTGS2	2
GO_BP_MM_POSITIVE_REGULATION_VASCULAR_ENDOTHELIAL_GROWTH_FACTOR_PRODUCTION	GO_BP_MM_POSITIVE_REGULATION_VASCULAR_ENDOTHELIAL_GROWTH_FACTOR_PRODUCTION	2/318	15/17799	0.02866	0.141744	0.110572	SULF1/PTGS2	2
GO_BP_MM_ORGAN_MORPHOGENESIS	GO_BP_MM_ORGAN_MORPHOGENESIS	5/318	96/17799	0.0288665	0.142122	0.110867	TBX3/PDGFRA/VEGFC/TCF21/HHIP	5
GO_BP_MM_METANEPHROS_DEVELOPMENT	GO_BP_MM_METANEPHROS_DEVELOPMENT	3/318	38/17799	0.0300695	0.146825	0.114536	SHH/BMP4/ITGA8	3
GO_BP_MM_POSITIVE_REGULATION_OF_MAPK_CASCADE	GO_BP_MM_POSITIVE_REGULATION_OF_MAPK_CASCADE	4/318	66/17799	0.0303352	0.146825	0.114536	IGFBP3/IL6/IL6RA/LIF	4
GO_BP_MM_RESPONSE_TO_ETHANOL	GO_BP_MM_RESPONSE_TO_ETHANOL	5/318	98/17799	0.0311759	0.146825	0.114536	SHH/CYP2E1/IL6RA/ADCYAP1R1/CCL2	5
GO_MF_MM_PEPTIDASE_ACTIVITY	GO_MF_MM_PEPTIDASE_ACTIVITY	6/318	132/17799	0.0313064	0.146825	0.114536	NAPSA/SHH/SLPI/LTF/NAALAD2/KLK1B21	6
GO_BP_MM_RESPONSE_TO_HORMONE_STIMULUS	GO_BP_MM_RESPONSE_TO_HORMONE_STIMULUS	4/318	67/17799	0.0318231	0.146825	0.114536	ANXA1/PDGFRA/MGP/RERG	4
GO_BP_MM_POSITIVE_REGULATION_OF_CELL_DIVISION	GO_BP_MM_POSITIVE_REGULATION_OF_CELL_DIVISION	3/318	39/17799	0.0321565	0.146825	0.114536	SHH/THBS4/VEGFC	3
GO_CC_MM_BRUSH_BORDER_MEMBRANE	GO_CC_MM_BRUSH_BORDER_MEMBRANE	3/318	39/17799	0.0321565	0.146825	0.114536	SLC6A14/ITLN1/ATP6V0A4	3
GO_MF_MM_SMAD_BINDING	GO_MF_MM_SMAD_BINDING	3/318	39/17799	0.0321565	0.146825	0.114536	COL5A2/COL3A1/COL1A2	3
GO_BP_MM_ANATOMICAL_STRUCTURE_MORPHOGENESIS	GO_BP_MM_ANATOMICAL_STRUCTURE_MORPHOGENESIS	2/318	16/17799	0.032374	0.146825	0.114536	PDGFRA/RET	2
GO_BP_MM_CAMP_BIOSYNTHETIC_PROCESS	GO_BP_MM_CAMP_BIOSYNTHETIC_PROCESS	2/318	16/17799	0.032374	0.146825	0.114536	ADM/ADCY7	2
GO_BP_MM_DECIDUALIZATION	GO_BP_MM_DECIDUALIZATION	2/318	16/17799	0.032374	0.146825	0.114536	PTGS2/LIF	2
GO_BP_MM_EMBRYONIC_MORPHOGENESIS	GO_BP_MM_EMBRYONIC_MORPHOGENESIS	2/318	16/17799	0.032374	0.146825	0.114536	SHH/BMP4	2
GO_BP_MM_INTERSPECIES_INTERACTION_BETWEEN_ORGANISMS	GO_BP_MM_INTERSPECIES_INTERACTION_BETWEEN_ORGANISMS	2/318	16/17799	0.032374	0.146825	0.114536	MST1R/CEACAM1	2
GO_BP_MM_POSITIVE_REGULATION_OF_ERYTHROCYTE_DIFFERENTIATION	GO_BP_MM_POSITIVE_REGULATION_OF_ERYTHROCYTE_DIFFERENTIATION	2/318	16/17799	0.032374	0.146825	0.114536	GATA2/ETS1	2
GO_BP_MM_POSITIVE_REGULATION_OF_RAS_PROTEIN_SIGNAL_TRANSDUCTION	GO_BP_MM_POSITIVE_REGULATION_OF_RAS_PROTEIN_SIGNAL_TRANSDUCTION	2/318	16/17799	0.032374	0.146825	0.114536	NTRK1/RASGRF1	2
GO_BP_MM_REGULATION_OF_BONE_MINERALIZATION	GO_BP_MM_REGULATION_OF_BONE_MINERALIZATION	2/318	16/17799	0.032374	0.146825	0.114536	DDR2/MGP	2
GO_BP_MM_STEROID_METABOLIC_PROCESS	GO_BP_MM_STEROID_METABOLIC_PROCESS	2/318	16/17799	0.032374	0.146825	0.114536	HSD11B1/CYP2E1	2
GO_BP_MM_XENOBIOTIC_METABOLIC_PROCESS	GO_BP_MM_XENOBIOTIC_METABOLIC_PROCESS	2/318	16/17799	0.032374	0.146825	0.114536	CYP2E1/GSTA4	2
GO_MF_MM_LAMININ_BINDING	GO_MF_MM_LAMININ_BINDING	2/318	16/17799	0.032374	0.146825	0.114536	ACHE/ECM1	2
GO_BP_MM_PROTEIN_PROCESSING	GO_BP_MM_PROTEIN_PROCESSING	3/318	40/17799	0.0343172	0.154995	0.120909	SRGN/ASPRV1/CPZ	3
GO_BP_MM_BONE_RESORPTION	GO_BP_MM_BONE_RESORPTION	2/318	17/17799	0.0362652	0.158551	0.123683	CTSK/RAC2	2
GO_BP_MM_COLLAGEN_CATABOLIC_PROCESS	GO_BP_MM_COLLAGEN_CATABOLIC_PROCESS	2/318	17/17799	0.0362652	0.158551	0.123683	MMP7/MMP2	2
GO_BP_MM_DORSAL_VENTRAL_NEURAL_TUBE_PATTERNING	GO_BP_MM_DORSAL_VENTRAL_NEURAL_TUBE_PATTERNING	2/318	17/17799	0.0362652	0.158551	0.123683	SHH/BMP4	2
GO_BP_MM_ORGANIC_ANION_TRANSPORT	GO_BP_MM_ORGANIC_ANION_TRANSPORT	2/318	17/17799	0.0362652	0.158551	0.123683	SLC16A3/SLCO2B1	2
GO_BP_MM_POSITIVE_REGULATION_OF_SMOOTHENED_SIGNALING_PATHWAY	GO_BP_MM_POSITIVE_REGULATION_OF_SMOOTHENED_SIGNALING_PATHWAY	2/318	17/17799	0.0362652	0.158551	0.123683	SHH/GLI1	2
GO_BP_MM_VENTRICULAR_SEPTUM_MORPHOGENESIS	GO_BP_MM_VENTRICULAR_SEPTUM_MORPHOGENESIS	2/318	17/17799	0.0362652	0.158551	0.123683	TBX3/ZFPM2	2
GO_CC_MM_MYELIN_SHEATH	GO_CC_MM_MYELIN_SHEATH	2/318	17/17799	0.0362652	0.158551	0.123683	TSPAN2/TUBB4A	2
GO_MF_MM_TRANSFORMING_GROWTH_FACTOR_BETA-ACTIVATED_RECEPTOR_ACTIVITY	GO_MF_MM_TRANSFORMING_GROWTH_FACTOR_BETA-ACTIVATED_RECEPTOR_ACTIVITY	2/318	17/17799	0.0362652	0.158551	0.123683	PSCA/ENG	2
GO_BP_MM_NEGATIVE_REGULATION_OF_CANONICAL_WNT_RECEPTOR_SIGNALING_PATHWAY	GO_BP_MM_NEGATIVE_REGULATION_OF_CANONICAL_WNT_RECEPTOR_SIGNALING_PATHWAY	4/318	71/17799	0.0381973	0.166333	0.129754	SHH/GLI1/DKK2/DKK3	4
GO_CC_MM_CYTOPLASMIC_MEMBRANE-BOUNDED_VESICLE	GO_CC_MM_CYTOPLASMIC_MEMBRANE-BOUNDED_VESICLE	5/318	104/17799	0.038785	0.167214	0.130441	NKD2/MALL/SLC30A2/GPNMB/ACSBG1	5
GO_BP_MM_POSITIVE_REGULATION_OF_PEPTIDYL-SERINE_PHOSPHORYLATION	GO_BP_MM_POSITIVE_REGULATION_OF_PEPTIDYL-SERINE_PHOSPHORYLATION	3/318	42/17799	0.0388584	0.167214	0.130441	CD44/IL6/LIF	3
GO_BP_MM_RESPONSE_TO_ORGANIC_NITROGEN	GO_BP_MM_RESPONSE_TO_ORGANIC_NITROGEN	3/318	42/17799	0.0388584	0.167214	0.130441	SHH/CYP2E1/PTGS2	3
GO_BP_MM_HOMOPHILIC_CELL_ADHESION	GO_BP_MM_HOMOPHILIC_CELL_ADHESION	5/318	105/17799	0.0401539	0.168875	0.131737	ESAM/RET/CDH13/DCHS1/PTPRT	5
GO_BP_MM_DIGESTIVE_TRACT_MORPHOGENESIS	GO_BP_MM_DIGESTIVE_TRACT_MORPHOGENESIS	2/318	18/17799	0.0403261	0.168875	0.131737	SHH/STRA6	2
GO_BP_MM_NEGATIVE_REGULATION_OF_SMOOTHENED_SIGNALING_PATHWAY	GO_BP_MM_NEGATIVE_REGULATION_OF_SMOOTHENED_SIGNALING_PATHWAY	2/318	18/17799	0.0403261	0.168875	0.131737	WNT7B/HHIP	2
GO_BP_MM_POSITIVE_CHEMOTAXIS	GO_BP_MM_POSITIVE_CHEMOTAXIS	2/318	18/17799	0.0403261	0.168875	0.131737	BMP4/VEGFC	2
GO_BP_MM_POSITIVE_REGULATION_OF_NEUROGENESIS	GO_BP_MM_POSITIVE_REGULATION_OF_NEUROGENESIS	2/318	18/17799	0.0403261	0.168875	0.131737	SERPINF1/ACE	2
GO_BP_MM_POSITIVE_REGULATION_OF_RAS_GTPASE_ACTIVITY	GO_BP_MM_POSITIVE_REGULATION_OF_RAS_GTPASE_ACTIVITY	2/318	18/17799	0.0403261	0.168875	0.131737	NTRK1/RASGRF1	2
GO_BP_MM_RESPONSE_TO_PAIN	GO_BP_MM_RESPONSE_TO_PAIN	2/318	18/17799	0.0403261	0.168875	0.131737	RET/PRKCG	2
GO_CC_MM_NEUROMUSCULAR_JUNCTION	GO_CC_MM_NEUROMUSCULAR_JUNCTION	3/318	43/17799	0.0412379	0.172034	0.134201	THBS4/ACHE/DES	3
GO_CC_MM_SYNAPTIC_VESICLE	GO_CC_MM_SYNAPTIC_VESICLE	4/318	73/17799	0.041639	0.173047	0.134991	DDC/MYLK2/SYT8/NPY1R	4
GO_CC_MM_AXON	GO_CC_MM_AXON	7/318	180/17799	0.0431933	0.178827	0.1395	SLC1A2/DDC/ACHE/AVIL/NRP2/NPY1R/WHRN	7
GO_BP_MM_CELLULAR_RESPONSE_TO_HYPOXIA	GO_BP_MM_CELLULAR_RESPONSE_TO_HYPOXIA	3/318	44/17799	0.0436891	0.179678	0.140164	PTGIS/PTGS2/FNDC1	3
GO_BP_MM_CAMP-MEDIATED_SIGNALING	GO_BP_MM_CAMP-MEDIATED_SIGNALING	2/318	19/17799	0.0445495	0.179678	0.140164	ADCYAP1R1/ADM	2
GO_BP_MM_CELLULAR_RESPONSE_TO_EXTRACELLULAR_STIMULUS	GO_BP_MM_CELLULAR_RESPONSE_TO_EXTRACELLULAR_STIMULUS	2/318	19/17799	0.0445495	0.179678	0.140164	AXL/SLC1A2	2
GO_BP_MM_NEGATIVE_REGULATION_OF_PROTEIN_CATABOLIC_PROCESS	GO_BP_MM_NEGATIVE_REGULATION_OF_PROTEIN_CATABOLIC_PROCESS	2/318	19/17799	0.0445495	0.179678	0.140164	SHH/PRKCG	2
GO_BP_MM_OSTEOBLAST_DEVELOPMENT	GO_BP_MM_OSTEOBLAST_DEVELOPMENT	2/318	19/17799	0.0445495	0.179678	0.140164	SHH/ACHE	2
GO_BP_MM_REGULATION_OF_NEURONAL_SYNAPTIC_PLASTICITY	GO_BP_MM_REGULATION_OF_NEURONAL_SYNAPTIC_PLASTICITY	2/318	19/17799	0.0445495	0.179678	0.140164	MYLK2/RASGRF1	2
GO_MF_MM_PEROXIDASE_ACTIVITY	GO_MF_MM_PEROXIDASE_ACTIVITY	2/318	19/17799	0.0445495	0.179678	0.140164	CYGB/PTGS2	2
GO_BP_MM_RESPONSE_TO_TOXIN	GO_BP_MM_RESPONSE_TO_TOXIN	4/318	75/17799	0.0452505	0.181834	0.141846	DDC/SLC6A14/CYP1A1/CYP2F2	4
GO_BP_MM_URETERIC_BUD_DEVELOPMENT	GO_BP_MM_URETERIC_BUD_DEVELOPMENT	3/318	45/17799	0.0462115	0.185015	0.144327	BMP4/RET/TCF21	3
GO_BP_MM_EMBRYONIC_DIGIT_MORPHOGENESIS	GO_BP_MM_EMBRYONIC_DIGIT_MORPHOGENESIS	3/318	46/17799	0.0488044	0.188971	0.147413	SHH/TBX3/BMP4	3
GO_BP_MM_ARTERY_MORPHOGENESIS	GO_BP_MM_ARTERY_MORPHOGENESIS	2/318	20/17799	0.0489284	0.188971	0.147413	ENG/STRA6	2
GO_BP_MM_EMBRYONIC_HEART_TUBE_DEVELOPMENT	GO_BP_MM_EMBRYONIC_HEART_TUBE_DEVELOPMENT	2/318	20/17799	0.0489284	0.188971	0.147413	TBX20/SOX18	2
GO_BP_MM_ENDOCHONDRAL_OSSIFICATION	GO_BP_MM_ENDOCHONDRAL_OSSIFICATION	2/318	20/17799	0.0489284	0.188971	0.147413	COL1A1/BMP4	2
GO_BP_MM_LEUKOTRIENE_BIOSYNTHETIC_PROCESS	GO_BP_MM_LEUKOTRIENE_BIOSYNTHETIC_PROCESS	2/318	20/17799	0.0489284	0.188971	0.147413	ALOXE3/ALOX5	2
GO_BP_MM_NEGATIVE_REGULATION_OF_INTERFERON-GAMMA_PRODUCTION	GO_BP_MM_NEGATIVE_REGULATION_OF_INTERFERON-GAMMA_PRODUCTION	2/318	20/17799	0.0489284	0.188971	0.147413	AXL/PGLYRP1	2
GO_BP_MM_POSITIVE_REGULATION_OF_NEUROBLAST_PROLIFERATION	GO_BP_MM_POSITIVE_REGULATION_OF_NEUROBLAST_PROLIFERATION	2/318	20/17799	0.0489284	0.188971	0.147413	SHH/VEGFC	2
GO_BP_MM_RESPIRATORY_GASEOUS_EXCHANGE	GO_BP_MM_RESPIRATORY_GASEOUS_EXCHANGE	2/318	20/17799	0.0489284	0.188971	0.147413	EDNRA/NDN	2
GO_BP_MM_RESPONSE_TO_X-RAY	GO_BP_MM_RESPONSE_TO_X-RAY	2/318	20/17799	0.0489284	0.188971	0.147413	ANXA1/THBD	2
GO_MF_MM_OXYGEN_BINDING	GO_MF_MM_OXYGEN_BINDING	2/318	20/17799	0.0489284	0.188971	0.147413	CYGB/CYP2F2	2
GO_BP_MM_RESPONSE_TO_HEAT	GO_BP_MM_RESPONSE_TO_HEAT	3/318	47/17799	0.0514671	0.198076	0.154516	IL6/DNAJA4/CCL2	3
GO_BP_MM_ANATOMICAL_STRUCTURE_FORMATION_INVOLVED_IN_MORPHOGENESIS	GO_BP_MM_ANATOMICAL_STRUCTURE_FORMATION_INVOLVED_IN_MORPHOGENESIS	2/318	21/17799	0.0534557	0.201473	0.157166	SHH/BMP4	2
GO_BP_MM_CALCIUM-INDEPENDENT_CELL-CELL_ADHESION	GO_BP_MM_CALCIUM-INDEPENDENT_CELL-CELL_ADHESION	2/318	21/17799	0.0534557	0.201473	0.157166	ESAM/CLDN1	2
GO_BP_MM_COMPLEMENT_ACTIVATION_CLASSICAL_PATHWAY	GO_BP_MM_COMPLEMENT_ACTIVATION_CLASSICAL_PATHWAY	2/318	21/17799	0.0534557	0.201473	0.157166	CD55/C4BP	2
GO_BP_MM_MORPHOGENESIS_OF_AN_EPITHELIUM	GO_BP_MM_MORPHOGENESIS_OF_AN_EPITHELIUM	2/318	21/17799	0.0534557	0.201473	0.157166	TBX4/SERPINB5	2
GO_BP_MM_POSITIVE_REGULATION_OF_GLUCOSE_IMPORT	GO_BP_MM_POSITIVE_REGULATION_OF_GLUCOSE_IMPORT	2/318	21/17799	0.0534557	0.201473	0.157166	SLC1A2/ITLN1	2
GO_MF_MM_PHOSPHATIDYLINOSITOL_3-KINASE_BINDING	GO_MF_MM_PHOSPHATIDYLINOSITOL_3-KINASE_BINDING	2/318	21/17799	0.0534557	0.201473	0.157166	INSRR/PDGFRA	2
GO_BP_MM_CELL-CELL_ADHESION	GO_BP_MM_CELL-CELL_ADHESION	4/318	80/17799	0.0550201	0.205949	0.160657	ESAM/CD34/SRPX2/THY1	4
GO_CC_MM_CILIUM	GO_CC_MM_CILIUM	4/318	80/17799	0.0550201	0.205949	0.160657	ANXA1/GLI1/WHRN/TUBB4A	4
GO_CC_MM_NEURON_PROJECTION	GO_CC_MM_NEURON_PROJECTION	5/318	116/17799	0.0571408	0.213157	0.16628	SLC1A2/CYGB/AVIL/ADCYAP1R1/PTGS2	5
GO_BP_MM_NEGATIVE_REGULATION_OF_ENDOTHELIAL_CELL_PROLIFERATION	GO_BP_MM_NEGATIVE_REGULATION_OF_ENDOTHELIAL_CELL_PROLIFERATION	2/318	22/17799	0.0581249	0.215358	0.167997	SULF1/ENG	2
GO_BP_MM_POSITIVE_REGULATION_OF_WNT_RECEPTOR_SIGNALING_PATHWAY	GO_BP_MM_POSITIVE_REGULATION_OF_WNT_RECEPTOR_SIGNALING_PATHWAY	2/318	22/17799	0.0581249	0.215358	0.167997	SHH/SULF1	2
GO_MF_MM_SERINE-TYPE_ENDOPEPTIDASE_ACTIVITY	GO_MF_MM_SERINE-TYPE_ENDOPEPTIDASE_ACTIVITY	7/318	193/17799	0.0586361	0.216518	0.168902	MCPT2/HGF/TMPRSS4/PRSS22/KLK1/KLK1B5/KLK1B21	7
GO_BP_MM_KERATINOCYTE_DIFFERENTIATION	GO_BP_MM_KERATINOCYTE_DIFFERENTIATION	3/318	50/17799	0.0598657	0.220314	0.171863	ANXA1/PTGS2/IVL	3
GO_CC_MM_CORNIFIED_ENVELOPE	GO_CC_MM_CORNIFIED_ENVELOPE	2/318	23/17799	0.0629295	0.23004	0.179451	ANXA1/IVL	2
GO_MF_MM_INSULIN-LIKE_GROWTH_FACTOR_BINDING	GO_MF_MM_INSULIN-LIKE_GROWTH_FACTOR_BINDING	2/318	23/17799	0.0629295	0.23004	0.179451	IGFBP3/IGFBP6	2
GO_BP_MM_RESPONSE_TO_NUTRIENT	GO_BP_MM_RESPONSE_TO_NUTRIENT	4/318	84/17799	0.06359	0.23168	0.180729	COL1A1/ALOX5/MGP/TNFRSF11B	4
GO_BP_MM_CELL-MATRIX_ADHESION	GO_BP_MM_CELL-MATRIX_ADHESION	3/318	52/17799	0.0657985	0.238273	0.185873	NID1/COL3A1/ITGBL1	3
GO_BP_MM_LIVER_DEVELOPMENT	GO_BP_MM_LIVER_DEVELOPMENT	4/318	85/17799	0.0658358	0.238273	0.185873	ADA/RUNX1/HGF/CYP1A1	4
GO_BP_MM_NEGATIVE_REGULATION_OF_SMOOTH_MUSCLE_CELL_PROLIFERATION	GO_BP_MM_NEGATIVE_REGULATION_OF_SMOOTH_MUSCLE_CELL_PROLIFERATION	2/318	24/17799	0.0678632	0.241755	0.188589	IGFBP3/APOD	2
GO_BP_MM_PHOSPHATIDYLINOSITOL-MEDIATED_SIGNALING	GO_BP_MM_PHOSPHATIDYLINOSITOL-MEDIATED_SIGNALING	2/318	24/17799	0.0678632	0.241755	0.188589	PIK3CG/PDGFRA	2
GO_BP_MM_RECEPTOR_INTERNALIZATION	GO_BP_MM_RECEPTOR_INTERNALIZATION	2/318	24/17799	0.0678632	0.241755	0.188589	ACHE/ADM	2
GO_BP_MM_TISSUE_REGENERATION	GO_BP_MM_TISSUE_REGENERATION	2/318	24/17799	0.0678632	0.241755	0.188589	APOD/IGSF10	2
GO_BP_MM_INNATE_IMMUNE_RESPONSE	GO_BP_MM_INNATE_IMMUNE_RESPONSE	5/318	122/17799	0.0679037	0.241755	0.188589	AXL/CD55/C4BP/PGLYRP1/MST1R	5
GO_BP_MM_POSITIVE_REGULATION_OF_GTPASE_ACTIVITY	GO_BP_MM_POSITIVE_REGULATION_OF_GTPASE_ACTIVITY	3/318	53/17799	0.0688623	0.243581	0.190013	RGS16/THY1/RGS13	3
GO_BP_MM_RESPONSE_TO_RETINOIC_ACID	GO_BP_MM_RESPONSE_TO_RETINOIC_ACID	3/318	53/17799	0.0688623	0.243581	0.190013	SERPINF1/SHH/BMP4	3
GO_BP_MM_CAMERA-TYPE_EYE_DEVELOPMENT	GO_BP_MM_CAMERA-TYPE_EYE_DEVELOPMENT	3/318	54/17799	0.0719897	0.250634	0.195515	SHH/BMP4/CYP1A1	3
GO_BP_MM_NEGATIVE_REGULATION_OF_NEURON_APOPTOTIC_PROCESS	GO_BP_MM_NEGATIVE_REGULATION_OF_NEURON_APOPTOTIC_PROCESS	4/318	88/17799	0.0728176	0.250634	0.195515	AXL/NTRK1/NDNF/PRKCG	4
GO_BP_MM_DIGESTIVE_TRACT_DEVELOPMENT	GO_BP_MM_DIGESTIVE_TRACT_DEVELOPMENT	2/318	25/17799	0.0729199	0.250634	0.195515	COL3A1/CYP1A1	2
GO_BP_MM_EMBRYONIC_CRANIAL_SKELETON_MORPHOGENESIS	GO_BP_MM_EMBRYONIC_CRANIAL_SKELETON_MORPHOGENESIS	2/318	25/17799	0.0729199	0.250634	0.195515	BMP4/PDGFRA	2
GO_BP_MM_EMBRYONIC_PLACENTA_DEVELOPMENT	GO_BP_MM_EMBRYONIC_PLACENTA_DEVELOPMENT	2/318	25/17799	0.0729199	0.250634	0.195515	GATA2/CSF2	2
GO_BP_MM_FEEDING_BEHAVIOR	GO_BP_MM_FEEDING_BEHAVIOR	2/318	25/17799	0.0729199	0.250634	0.195515	STRA6/NPY1R	2
GO_BP_MM_REGULATION_OF_CELL_DIFFERENTIATION	GO_BP_MM_REGULATION_OF_CELL_DIFFERENTIATION	2/318	25/17799	0.0729199	0.250634	0.195515	BMP4/LIF	2
GO_CC_MM_GOLGI_STACK	GO_CC_MM_GOLGI_STACK	2/318	25/17799	0.0729199	0.250634	0.195515	CLIP3/SULF1	2
GO_MF_MM_REPRESSING_TRANSCRIPTION_FACTOR_BINDING	GO_MF_MM_REPRESSING_TRANSCRIPTION_FACTOR_BINDING	2/318	25/17799	0.0729199	0.250634	0.195515	RUNX1/ZFP703	2
GO_BP_MM_BLOOD_COAGULATION	GO_BP_MM_BLOOD_COAGULATION	3/318	56/17799	0.0784314	0.267058	0.208327	SHH/PAPSS2/THBD	3
GO_BP_MM_RESPONSE_TO_CAMP	GO_BP_MM_RESPONSE_TO_CAMP	3/318	56/17799	0.0784314	0.267058	0.208327	COL1A1/IL6RA/THBD	3
GO_MF_MM_SERINE-TYPE_PEPTIDASE_ACTIVITY	GO_MF_MM_SERINE-TYPE_PEPTIDASE_ACTIVITY	3/318	56/17799	0.0784314	0.267058	0.208327	CES2E/LTF/CES2C	3
GO_BP_MM_MULTICELLULAR_ORGANISMAL_DEVELOPMENT	GO_BP_MM_MULTICELLULAR_ORGANISMAL_DEVELOPMENT	11/318	382/17799	0.0824263	0.27622	0.215474	SHH/WIF1/WNT7B/OLFML3/DKK2/DKK3/PLXNB3/NKD1/MST1R/SEMA3D/HIC1	11
GO_BP_MM_ATP_BIOSYNTHETIC_PROCESS	GO_BP_MM_ATP_BIOSYNTHETIC_PROCESS	2/318	27/17799	0.0833787	0.27622	0.215474	ATP2A3/ATP2C2	2
GO_BP_MM_CELLULAR_RESPONSE_TO_DRUG	GO_BP_MM_CELLULAR_RESPONSE_TO_DRUG	2/318	27/17799	0.0833787	0.27622	0.215474	DPEP1/DDC	2
GO_BP_MM_CELLULAR_RESPONSE_TO_INTERLEUKIN-1	GO_BP_MM_CELLULAR_RESPONSE_TO_INTERLEUKIN-1	2/318	27/17799	0.0833787	0.27622	0.215474	PTGIS/CCL2	2
GO_BP_MM_PLACENTA_DEVELOPMENT	GO_BP_MM_PLACENTA_DEVELOPMENT	2/318	27/17799	0.0833787	0.27622	0.215474	ADA/DCN	2
GO_BP_MM_PROTEIN_KINASE_B_SIGNALING_CASCADE	GO_BP_MM_PROTEIN_KINASE_B_SIGNALING_CASCADE	2/318	27/17799	0.0833787	0.27622	0.215474	AXL/CCL2	2
GO_BP_MM_TELENCEPHALON_DEVELOPMENT	GO_BP_MM_TELENCEPHALON_DEVELOPMENT	2/318	27/17799	0.0833787	0.27622	0.215474	SLC1A2/BMP4	2
GO_CC_MM_INTEGRIN_COMPLEX	GO_CC_MM_INTEGRIN_COMPLEX	2/318	27/17799	0.0833787	0.27622	0.215474	ITGA8/ITGBL1	2
GO_CC_MM_APICAL_PLASMA_MEMBRANE	GO_CC_MM_APICAL_PLASMA_MEMBRANE	7/318	210/17799	0.0833966	0.27622	0.215474	CD34/IL6RA/SLCO2B1/SCNN1B/THY1/ATP6V0A4/KCNE4	7
GO_BP_MM_POSITIVE_REGULATION_OF_APOPTOTIC_PROCESS	GO_BP_MM_POSITIVE_REGULATION_OF_APOPTOTIC_PROCESS	7/318	211/17799	0.0850152	0.280214	0.21859	CLIP3/PTGIS/IGFBP3/ACE/BMP4/ANXA1/PTGS2	7
GO_BP_MM_CELLULAR_RESPONSE_TO_LIPOPOLYSACCHARIDE	GO_BP_MM_CELLULAR_RESPONSE_TO_LIPOPOLYSACCHARIDE	3/318	58/17799	0.0851153	0.280214	0.21859	AXL/TNFRSF1B/CCL2	3
GO_BP_MM_NEGATIVE_REGULATION_OF_CYSTEINE-TYPE_ENDOPEPTIDASE_ACTIVITY_INVOLVED_IN_APOPTOTIC_PROCESS	GO_BP_MM_NEGATIVE_REGULATION_OF_CYSTEINE-TYPE_ENDOPEPTIDASE_ACTIVITY_INVOLVED_IN_APOPTOTIC_PROCESS	3/318	59/17799	0.0885455	0.283699	0.221309	CD44/DPEP1/IL6	3
GO_BP_MM_RETINA_DEVELOPMENT_IN_CAMERA-TYPE_EYE	GO_BP_MM_RETINA_DEVELOPMENT_IN_CAMERA-TYPE_EYE	3/318	59/17799	0.0885455	0.283699	0.221309	BMP4/ACHE/LIF	3
GO_CC_MM_CAVEOLA	GO_CC_MM_CAVEOLA	3/318	59/17799	0.0885455	0.283699	0.221309	PTGIS/ADCYAP1R1/PTGS2	3
GO_BP_MM_KERATINIZATION	GO_BP_MM_KERATINIZATION	2/318	28/17799	0.0887694	0.283699	0.221309	IVL/SPRR1A	2
GO_BP_MM_NEGATIVE_REGULATION_OF_TUMOR_NECROSIS_FACTOR_PRODUCTION	GO_BP_MM_NEGATIVE_REGULATION_OF_TUMOR_NECROSIS_FACTOR_PRODUCTION	2/318	28/17799	0.0887694	0.283699	0.221309	AXL/CD34	2
GO_BP_MM_POSITIVE_REGULATION_OF_BONE_MINERALIZATION	GO_BP_MM_POSITIVE_REGULATION_OF_BONE_MINERALIZATION	2/318	28/17799	0.0887694	0.283699	0.221309	BMP4/FBN2	2
GO_BP_MM_POSITIVE_REGULATION_OF_INFLAMMATORY_RESPONSE	GO_BP_MM_POSITIVE_REGULATION_OF_INFLAMMATORY_RESPONSE	2/318	28/17799	0.0887694	0.283699	0.221309	ACE/EDNRA	2
GO_BP_MM_POSITIVE_REGULATION_OF_NITRIC_OXIDE_BIOSYNTHETIC_PROCESS	GO_BP_MM_POSITIVE_REGULATION_OF_NITRIC_OXIDE_BIOSYNTHETIC_PROCESS	2/318	28/17799	0.0887694	0.283699	0.221309	IL6/PTGS2	2
GO_BP_MM_T_CELL_ACTIVATION	GO_BP_MM_T_CELL_ACTIVATION	2/318	28/17799	0.0887694	0.283699	0.221309	ADA/IL6	2
GO_MF_MM_VOLTAGE-GATED_ION_CHANNEL_ACTIVITY	GO_MF_MM_VOLTAGE-GATED_ION_CHANNEL_ACTIVITY	2/318	28/17799	0.0887694	0.283699	0.221309	TRPM5/CACNA2D4	2
GO_BP_MM_NEURON_MIGRATION	GO_BP_MM_NEURON_MIGRATION	4/318	95/17799	0.0904975	0.288378	0.224959	AXL/TBX20/NDN/NDNF	4
GO_MF_MM_TRANSFERASE_ACTIVITY_TRANSFERRING_HEXOSYL_GROUPS	GO_MF_MM_TRANSFERASE_ACTIVITY_TRANSFERRING_HEXOSYL_GROUPS	3/318	60/17799	0.0920329	0.292419	0.228111	UGT2B35/UGT2B5/UGT2B36	3
GO_BP_MM_CHONDROCYTE_DIFFERENTIATION	GO_BP_MM_CHONDROCYTE_DIFFERENTIATION	2/318	29/17799	0.0942604	0.298628	0.232955	BMP4/TGFBI	2
GO_MF_MM_STRUCTURAL_MOLECULE_ACTIVITY	GO_MF_MM_STRUCTURAL_MOLECULE_ACTIVITY	6/318	176/17799	0.0963013	0.304212	0.237311	CLDN1/ANXA1/COL15A1/KRT20/IVL/TUBB4A	6
GO_CC_MM_NEURONAL_CELL_BODY	GO_CC_MM_NEURONAL_CELL_BODY	8/318	261/17799	0.0971749	0.306087	0.238774	ADA/DDC/CYGB/APOD/MYLK2/CCL2/WHRN/TUBB4A	8
GO_BP_MM_REGULATION_OF_PROTEOLYSIS	GO_BP_MM_REGULATION_OF_PROTEOLYSIS	3/318	62/17799	0.0991752	0.308283	0.240486	SERPINF1/SHH/SERPINB5	3
GO_CC_MM_CELL_PROJECTION	GO_CC_MM_CELL_PROJECTION	3/318	62/17799	0.0991752	0.308283	0.240486	AVIL/NDN/TUBB4A	3
GO_BP_MM_PROTEIN_AUTOPHOSPHORYLATION	GO_BP_MM_PROTEIN_AUTOPHOSPHORYLATION	5/318	137/17799	0.0993417	0.308283	0.240486	INSRR/DDR2/MYLK2/NTRK1/PDGFRA	5
GO_BP_MM_BROWN_FAT_CELL_DIFFERENTIATION	GO_BP_MM_BROWN_FAT_CELL_DIFFERENTIATION	2/318	30/17799	0.0998463	0.308283	0.240486	RARRES2/PTGS2	2
GO_BP_MM_CELL_PROJECTION_ORGANIZATION	GO_BP_MM_CELL_PROJECTION_ORGANIZATION	2/318	30/17799	0.0998463	0.308283	0.240486	ITGA8/TUBB4A	2
GO_BP_MM_STEM_CELL_MAINTENANCE	GO_BP_MM_STEM_CELL_MAINTENANCE	2/318	30/17799	0.0998463	0.308283	0.240486	TBX3/LIF	2
GO_MF_MM_RNA_POLYMERASE_PROXIMAL_REGION_SEQUENCE-SPECIFIC_NEGATIVE_REGULATION_TRANSCRIPTION	GO_MF_MM_RNA_POLYMERASE_PROXIMAL_REGION_SEQUENCE-SPECIFIC_NEGATIVE_REGULATION_TRANSCRIPTION	2/318	30/17799	0.0998463	0.308283	0.240486	SNAI1/TCF21	2
GO_CC_MM_DENDRITE	GO_CC_MM_DENDRITE	7/318	221/17799	0.102181	0.314601	0.245415	APOD/ACHE/ALOX5/MYLK2/THY1/WHRN/PRKCG	7
GO_CC_MM_INTERMEDIATE_FILAMENT	GO_CC_MM_INTERMEDIATE_FILAMENT	3/318	63/17799	0.102828	0.315705	0.246276	DES/BFSP1/KRT20	3
GO_BP_MM_MESODERM_FORMATION	GO_BP_MM_MESODERM_FORMATION	2/318	31/17799	0.105522	0.317729	0.247855	BMP4/SNAI1	2
GO_BP_MM_PHAGOCYTOSIS	GO_BP_MM_PHAGOCYTOSIS	2/318	31/17799	0.105522	0.317729	0.247855	AXL/GATA2	2
GO_BP_MM_POTASSIUM_ION_TRANSMEMBRANE_TRANSPORT	GO_BP_MM_POTASSIUM_ION_TRANSMEMBRANE_TRANSPORT	2/318	31/17799	0.105522	0.317729	0.247855	TRPM5/ABCC8	2
GO_BP_MM_RESPONSE_TO_AXON_INJURY	GO_BP_MM_RESPONSE_TO_AXON_INJURY	2/318	31/17799	0.105522	0.317729	0.247855	SHH/APOD	2
GO_BP_MM_RESPONSE_TO_COLD	GO_BP_MM_RESPONSE_TO_COLD	2/318	31/17799	0.105522	0.317729	0.247855	IL6/ADM	2
GO_BP_MM_SPERM_MOTILITY	GO_BP_MM_SPERM_MOTILITY	2/318	31/17799	0.105522	0.317729	0.247855	NEURL1A/PLTP	2
GO_BP_MM_TISSUE_DEVELOPMENT	GO_BP_MM_TISSUE_DEVELOPMENT	2/318	31/17799	0.105522	0.317729	0.247855	BMP4/POSTN	2
GO_BP_MM_CYTOSKELETON_ORGANIZATION	GO_BP_MM_CYTOSKELETON_ORGANIZATION	4/318	101/17799	0.107128	0.321677	0.250935	LSP1/AVIL/THY1/CCL2	4
GO_BP_MM_CENTRAL_NERVOUS_SYSTEM_DEVELOPMENT	GO_BP_MM_CENTRAL_NERVOUS_SYSTEM_DEVELOPMENT	3/318	65/17799	0.11029	0.32349	0.252349	SHH/RUNX1/NDN	3
GO_BP_MM_NEGATIVE_REGULATION_OF_ENDOPEPTIDASE_ACTIVITY	GO_BP_MM_NEGATIVE_REGULATION_OF_ENDOPEPTIDASE_ACTIVITY	3/318	65/17799	0.11029	0.32349	0.252349	SERPINF1/RECK/SERPINB5	3
GO_BP_MM_REGULATION_OF_SMALL_GTPASE_MEDIATED_SIGNAL_TRANSDUCTION	GO_BP_MM_REGULATION_OF_SMALL_GTPASE_MEDIATED_SIGNAL_TRANSDUCTION	3/318	65/17799	0.11029	0.32349	0.252349	RASGRF1/RAP1GAP2/RASGRP3	3
GO_BP_MM_CELLULAR_RESPONSE_TO_ORGANIC_SUBSTANCE	GO_BP_MM_CELLULAR_RESPONSE_TO_ORGANIC_SUBSTANCE	2/318	32/17799	0.111283	0.32349	0.252349	CD68/CLEC3B	2
GO_BP_MM_EMBRYONIC_HINDLIMB_MORPHOGENESIS	GO_BP_MM_EMBRYONIC_HINDLIMB_MORPHOGENESIS	2/318	32/17799	0.111283	0.32349	0.252349	SHH/BMP4	2
GO_BP_MM_INSULIN_SECRETION	GO_BP_MM_INSULIN_SECRETION	2/318	32/17799	0.111283	0.32349	0.252349	FAM3B/ANXA1	2
GO_BP_MM_MUSCLE_CONTRACTION	GO_BP_MM_MUSCLE_CONTRACTION	2/318	32/17799	0.111283	0.32349	0.252349	MYLK2/TBX20	2
GO_BP_MM_NEGATIVE_REGULATION_OF_CELL_CYCLE	GO_BP_MM_NEGATIVE_REGULATION_OF_CELL_CYCLE	2/318	32/17799	0.111283	0.32349	0.252349	BMP4/ETS1	2
GO_BP_MM_POSITIVE_REGULATION_OF_INTERLEUKIN-6_PRODUCTION	GO_BP_MM_POSITIVE_REGULATION_OF_INTERLEUKIN-6_PRODUCTION	2/318	32/17799	0.111283	0.32349	0.252349	IL6/IL6RA	2
GO_BP_MM_RESPONSE_TO_BACTERIUM	GO_BP_MM_RESPONSE_TO_BACTERIUM	2/318	32/17799	0.111283	0.32349	0.252349	IL6/CCL2	2
GO_BP_MM_RESPONSE_TO_CHEMICAL_STIMULUS	GO_BP_MM_RESPONSE_TO_CHEMICAL_STIMULUS	2/318	32/17799	0.111283	0.32349	0.252349	MGP/ABCC8	2
GO_BP_MM_RESPONSE_TO_INTERLEUKIN-1	GO_BP_MM_RESPONSE_TO_INTERLEUKIN-1	2/318	32/17799	0.111283	0.32349	0.252349	ANXA1/ETS1	2
GO_BP_MM_MIDBRAIN_DEVELOPMENT	GO_BP_MM_MIDBRAIN_DEVELOPMENT	2/318	33/17799	0.117124	0.336884	0.262798	SHH/CXCL5	2
GO_BP_MM_REGULATION_OF_CELL_ADHESION	GO_BP_MM_REGULATION_OF_CELL_ADHESION	2/318	33/17799	0.117124	0.336884	0.262798	LAMA2/RET	2
GO_BP_MM_RHO_PROTEIN_SIGNAL_TRANSDUCTION	GO_BP_MM_RHO_PROTEIN_SIGNAL_TRANSDUCTION	2/318	33/17799	0.117124	0.336884	0.262798	COL1A2/EDNRA	2
GO_CC_MM_DENDRITIC_SHAFT	GO_CC_MM_DENDRITIC_SHAFT	2/318	33/17799	0.117124	0.336884	0.262798	SLC1A2/WHRN	2
GO_CC_MM_ACTIN_CYTOSKELETON	GO_CC_MM_ACTIN_CYTOSKELETON	5/318	145/17799	0.118632	0.340329	0.265485	LCP1/SLC16A3/BFSP1/CORO2A/FLNC	5
GO_CC_MM_MICROSOME	GO_CC_MM_MICROSOME	8/318	275/17799	0.120912	0.345961	0.269878	CLIP3/CYP2E1/ACSBG1/CYP1A1/PTGS2/FA2H/PTGES/CYP2F2	8
GO_BP_MM_NEGATIVE_REGULATION_OF_GENE_EXPRESSION	GO_BP_MM_NEGATIVE_REGULATION_OF_GENE_EXPRESSION	3/318	68/17799	0.121859	0.347759	0.271281	SHH/CD34/BMP4	3
GO_CC_MM_ACTIN_FILAMENT	GO_CC_MM_ACTIN_FILAMENT	2/318	34/17799	0.12304	0.350214	0.273197	LCP1/WHRN	2
GO_BP_MM_CELL_MIGRATION	GO_BP_MM_CELL_MIGRATION	4/318	107/17799	0.125027	0.354947	0.276889	ENG/COL5A1/PDGFRA/SNAI1	4
GO_BP_MM_CYTOKINE-MEDIATED_SIGNALING_PATHWAY	GO_BP_MM_CYTOKINE-MEDIATED_SIGNALING_PATHWAY	3/318	69/17799	0.12581	0.355325	0.277183	IL6/IL6RA/CCL2	3
GO_BP_MM_RESPONSE_TO_INSULIN_STIMULUS	GO_BP_MM_RESPONSE_TO_INSULIN_STIMULUS	3/318	69/17799	0.12581	0.355325	0.277183	IL6/ADM/ABCC8	3
GO_BP_MM_RESPONSE_TO_GAMMA_RADIATION	GO_BP_MM_RESPONSE_TO_GAMMA_RADIATION	2/318	35/17799	0.129027	0.363469	0.283537	IL6RA/CCL2	2
GO_MF_MM_ACTIN_FILAMENT_BINDING	GO_MF_MM_ACTIN_FILAMENT_BINDING	3/318	70/17799	0.129808	0.364729	0.284519	LCP1/CORO2A/MYH7B	3
GO_BP_MM_INTEGRIN-MEDIATED_SIGNALING_PATHWAY	GO_BP_MM_INTEGRIN-MEDIATED_SIGNALING_PATHWAY	3/318	71/17799	0.133849	0.373779	0.291579	COL3A1/ITGA8/ITGBL1	3
GO_BP_MM_BLOOD_VESSEL_REMODELING	GO_BP_MM_BLOOD_VESSEL_REMODELING	2/318	36/17799	0.13508	0.373779	0.291579	AXL/LIF	2
GO_BP_MM_NEURON_PROJECTION_MORPHOGENESIS	GO_BP_MM_NEURON_PROJECTION_MORPHOGENESIS	2/318	36/17799	0.13508	0.373779	0.291579	THBS4/NBL1	2
GO_BP_MM_POSITIVE_REGULATION_OF_CELL_DIFFERENTIATION	GO_BP_MM_POSITIVE_REGULATION_OF_CELL_DIFFERENTIATION	2/318	36/17799	0.13508	0.373779	0.291579	SHH/BMP4	2
GO_CC_MM_ADHERENS_JUNCTION	GO_CC_MM_ADHERENS_JUNCTION	2/318	36/17799	0.13508	0.373779	0.291579	ESAM/TMEM204	2
GO_MF_MM_ATPASE_ACTIVITY_COUPLED_TO_TRANSMEMBRANE_MOVEMENT_OF_IONS_PHOSPHORYLATIVE_MECHANISM	GO_MF_MM_ATPASE_ACTIVITY_COUPLED_TO_TRANSMEMBRANE_MOVEMENT_OF_IONS_PHOSPHORYLATIVE_MECHANISM	2/318	36/17799	0.13508	0.373779	0.291579	ATP2A3/ATP2C2	2
GO_BP_MM_GROWTH	GO_BP_MM_GROWTH	2/318	37/17799	0.141196	0.386784	0.301724	BMP4/BMP5	2
GO_BP_MM_POSITIVE_REGULATION_OF_FIBROBLAST_PROLIFERATION	GO_BP_MM_POSITIVE_REGULATION_OF_FIBROBLAST_PROLIFERATION	2/318	37/17799	0.141196	0.386784	0.301724	DDR2/PDGFRA	2
GO_BP_MM_RESPONSE_TO_NUTRIENT_LEVELS	GO_BP_MM_RESPONSE_TO_NUTRIENT_LEVELS	2/318	37/17799	0.141196	0.386784	0.301724	ACE/IL6	2
GO_MF_MM_POTASSIUM_CHANNEL_ACTIVITY	GO_MF_MM_POTASSIUM_CHANNEL_ACTIVITY	2/318	37/17799	0.141196	0.386784	0.301724	TRPM5/ABCC8	2
GO_CC_MM_TRANSPORT_VESICLE	GO_CC_MM_TRANSPORT_VESICLE	2/318	38/17799	0.147369	0.402687	0.314129	SHH/CRISPLD2	2
GO_MF_MM_CALCIUM-DEPENDENT_PROTEIN_BINDING	GO_MF_MM_CALCIUM-DEPENDENT_PROTEIN_BINDING	2/318	39/17799	0.153597	0.407826	0.318138	MGP/SYT8	2
GO_CC_MM_ENDOPLASMIC_RETICULUM_LUMEN	GO_CC_MM_ENDOPLASMIC_RETICULUM_LUMEN	3/318	77/17799	0.158965	0.407826	0.318138	RCN3/ACHE/CES1G	3
GO_CC_MM_PROTEIN_COMPLEX	GO_CC_MM_PROTEIN_COMPLEX	8/318	295/17799	0.159614	0.407826	0.318138	COL6A1/GATA2/COL6A2/ANXA1/MGP/STRA6/PTGS2/TUBB4A	8
GO_BP_MM_ENDOCRINE_PANCREAS_DEVELOPMENT	GO_BP_MM_ENDOCRINE_PANCREAS_DEVELOPMENT	2/318	40/17799	0.159875	0.407826	0.318138	ANXA1/IL6	2
GO_BP_MM_TERMINATION_OF_G-PROTEIN_COUPLED_RECEPTOR_SIGNALING_PATHWAY	GO_BP_MM_TERMINATION_OF_G-PROTEIN_COUPLED_RECEPTOR_SIGNALING_PATHWAY	2/318	40/17799	0.159875	0.407826	0.318138	RGS16/RGS13	2
GO_MF_MM_SERINE-TYPE_ENDOPEPTIDASE_INHIBITOR_ACTIVITY	GO_MF_MM_SERINE-TYPE_ENDOPEPTIDASE_INHIBITOR_ACTIVITY	4/318	118/17799	0.160798	0.407826	0.318138	SERPINF1/SLPI/RECK/SERPINB5	4
GO_MF_MM_METALLOENDOPEPTIDASE_ACTIVITY	GO_MF_MM_METALLOENDOPEPTIDASE_ACTIVITY	4/318	119/17799	0.16422	0.407826	0.318138	ADAMTS4/MMP7/MMP2/PHEX	4
GO_BP_MM_AXONAL_FASCICULATION	GO_BP_MM_AXONAL_FASCICULATION	1/318	10/17799	0.165	0.407826	0.318138	NDN	1
GO_BP_MM_BLOOD_VESSEL_ENDOTHELIAL_CELL_MIGRATION	GO_BP_MM_BLOOD_VESSEL_ENDOTHELIAL_CELL_MIGRATION	1/318	10/17799	0.165	0.407826	0.318138	SOX18	1
GO_BP_MM_CARBOXYLIC_ACID_METABOLIC_PROCESS	GO_BP_MM_CARBOXYLIC_ACID_METABOLIC_PROCESS	1/318	10/17799	0.165	0.407826	0.318138	DDC	1
GO_BP_MM_ECTODERM_DEVELOPMENT	GO_BP_MM_ECTODERM_DEVELOPMENT	1/318	10/17799	0.165	0.407826	0.318138	SHH	1
GO_BP_MM_ESTROGEN_METABOLIC_PROCESS	GO_BP_MM_ESTROGEN_METABOLIC_PROCESS	1/318	10/17799	0.165	0.407826	0.318138	PDGFRA	1
GO_BP_MM_GLUTAMATE_METABOLIC_PROCESS	GO_BP_MM_GLUTAMATE_METABOLIC_PROCESS	1/318	10/17799	0.165	0.407826	0.318138	CD34	1
GO_BP_MM_HEART_CONTRACTION	GO_BP_MM_HEART_CONTRACTION	1/318	10/17799	0.165	0.407826	0.318138	ACE	1
GO_BP_MM_HIGH-DENSITY_LIPOPROTEIN_PARTICLE_REMODELING	GO_BP_MM_HIGH-DENSITY_LIPOPROTEIN_PARTICLE_REMODELING	1/318	10/17799	0.165	0.407826	0.318138	ABCG1	1
GO_BP_MM_LEUKOTRIENE_METABOLIC_PROCESS	GO_BP_MM_LEUKOTRIENE_METABOLIC_PROCESS	1/318	10/17799	0.165	0.407826	0.318138	ALOX5	1
GO_BP_MM_NEGATIVE_REGULATION_OF_ANDROGEN_RECEPTOR_SIGNALING_PATHWAY	GO_BP_MM_NEGATIVE_REGULATION_OF_ANDROGEN_RECEPTOR_SIGNALING_PATHWAY	1/318	10/17799	0.165	0.407826	0.318138	TCF21	1
GO_BP_MM_NEGATIVE_REGULATION_OF_PROTEIN_SECRETION	GO_BP_MM_NEGATIVE_REGULATION_OF_PROTEIN_SECRETION	1/318	10/17799	0.165	0.407826	0.318138	ANXA1	1
GO_BP_MM_POSITIVE_REGULATION_OF_OLIGODENDROCYTE_DIFFERENTIATION	GO_BP_MM_POSITIVE_REGULATION_OF_OLIGODENDROCYTE_DIFFERENTIATION	1/318	10/17799	0.165	0.407826	0.318138	SHH	1
GO_BP_MM_POSITIVE_REGULATION_OF_PEPTIDASE_ACTIVITY	GO_BP_MM_POSITIVE_REGULATION_OF_PEPTIDASE_ACTIVITY	1/318	10/17799	0.165	0.407826	0.318138	FBLN1	1
GO_BP_MM_POSITIVE_REGULATION_OF_PROTEIN_IMPORT_INTO_NUCLEUS	GO_BP_MM_POSITIVE_REGULATION_OF_PROTEIN_IMPORT_INTO_NUCLEUS	1/318	10/17799	0.165	0.407826	0.318138	SHH	1
GO_BP_MM_POSITIVE_REGULATION_OF_PROTEIN_IMPORT_INTO_NUCLEUS_TRANSLOCATION	GO_BP_MM_POSITIVE_REGULATION_OF_PROTEIN_IMPORT_INTO_NUCLEUS_TRANSLOCATION	1/318	10/17799	0.165	0.407826	0.318138	IL6	1
GO_BP_MM_PROSTATE_GLAND_EPITHELIUM_MORPHOGENESIS	GO_BP_MM_PROSTATE_GLAND_EPITHELIUM_MORPHOGENESIS	1/318	10/17799	0.165	0.407826	0.318138	TNC	1
GO_BP_MM_REGULATION_OF_GTPASE_ACTIVITY	GO_BP_MM_REGULATION_OF_GTPASE_ACTIVITY	1/318	10/17799	0.165	0.407826	0.318138	RASGRP3	1
GO_BP_MM_REPRODUCTIVE_STRUCTURE_DEVELOPMENT	GO_BP_MM_REPRODUCTIVE_STRUCTURE_DEVELOPMENT	1/318	10/17799	0.165	0.407826	0.318138	TCF21	1
GO_BP_MM_RESPONSE_TO_HERBICIDE	GO_BP_MM_RESPONSE_TO_HERBICIDE	1/318	10/17799	0.165	0.407826	0.318138	CYP1A1	1
GO_BP_MM_TRIGLYCERIDE_BIOSYNTHETIC_PROCESS	GO_BP_MM_TRIGLYCERIDE_BIOSYNTHETIC_PROCESS	1/318	10/17799	0.165	0.407826	0.318138	LPL	1
GO_BP_MM_TRIGLYCERIDE_CATABOLIC_PROCESS	GO_BP_MM_TRIGLYCERIDE_CATABOLIC_PROCESS	1/318	10/17799	0.165	0.407826	0.318138	LPL	1
GO_CC_MM_VACUOLAR_MEMBRANE	GO_CC_MM_VACUOLAR_MEMBRANE	1/318	10/17799	0.165	0.407826	0.318138	SLC30A2	1
GO_CC_MM_VACUOLAR_PROTON-TRANSPORTING_V-TYPE_ATPASE_COMPLEX	GO_CC_MM_VACUOLAR_PROTON-TRANSPORTING_V-TYPE_ATPASE_COMPLEX	1/318	10/17799	0.165	0.407826	0.318138	ATP6V0A4	1
GO_MF_MM_PLATELET-DERIVED_GROWTH_FACTOR_RECEPTOR_BINDING	GO_MF_MM_PLATELET-DERIVED_GROWTH_FACTOR_RECEPTOR_BINDING	1/318	10/17799	0.165	0.407826	0.318138	PDGFRA	1
GO_MF_MM_PORIN_ACTIVITY	GO_MF_MM_PORIN_ACTIVITY	1/318	10/17799	0.165	0.407826	0.318138	ASPN	1
GO_MF_MM_TRANSFORMING_GROWTH_FACTOR_BETA_BINDING	GO_MF_MM_TRANSFORMING_GROWTH_FACTOR_BETA_BINDING	1/318	10/17799	0.165	0.407826	0.318138	ENG	1
GO_BP_MM_HAIR_FOLLICLE_DEVELOPMENT	GO_BP_MM_HAIR_FOLLICLE_DEVELOPMENT	2/318	41/17799	0.166199	0.407826	0.318138	SHH/SOX18	2
GO_CC_MM_GROWTH_CONE	GO_CC_MM_GROWTH_CONE	3/318	80/17799	0.172026	0.407826	0.318138	THY1/RASGRF1/WHRN	3
GO_BP_MM_MEMORY	GO_BP_MM_MEMORY	2/318	42/17799	0.172566	0.407826	0.318138	ITGA8/PTGS2	2
GO_MF_MM_KINASE_BINDING	GO_MF_MM_KINASE_BINDING	2/318	42/17799	0.172566	0.407826	0.318138	SNAI1/RASGRP3	2
GO_BP_MM_ELEVATION_OF_CYTOSOLIC_CALCIUM_ION_CONCENTRATION	GO_BP_MM_ELEVATION_OF_CYTOSOLIC_CALCIUM_ION_CONCENTRATION	3/318	81/17799	0.176446	0.407826	0.318138	PDGFRA/ADM/EDNRA	3
GO_BP_MM_CELL_DEATH	GO_BP_MM_CELL_DEATH	2/318	43/17799	0.178973	0.407826	0.318138	SHH/TNFRSF1B	2
GO_BP_MM_ANAGEN	GO_BP_MM_ANAGEN	1/318	11/17799	0.179926	0.407826	0.318138	PTGS2	1
GO_BP_MM_EAR_DEVELOPMENT	GO_BP_MM_EAR_DEVELOPMENT	1/318	11/17799	0.179926	0.407826	0.318138	STRA6	1
GO_BP_MM_ELEVATION_OF_CYTOSOLIC_CALCIUM_ION_CONCENTRATION_INVOLVED_IN_PHOSPHOLIPASE_C-ACTIVATING_G-PROTEIN_COUPLED_SIGNALING_PATHWAY	GO_BP_MM_ELEVATION_OF_CYTOSOLIC_CALCIUM_ION_CONCENTRATION_INVOLVED_IN_PHOSPHOLIPASE_C-ACTIVATING_G-PROTEIN_COUPLED_SIGNALING_PATHWAY	1/318	11/17799	0.179926	0.407826	0.318138	EDNRA	1
GO_BP_MM_EMBRYONIC_FOREGUT_MORPHOGENESIS	GO_BP_MM_EMBRYONIC_FOREGUT_MORPHOGENESIS	1/318	11/17799	0.179926	0.407826	0.318138	SHH	1
GO_BP_MM_FORELIMB_MORPHOGENESIS	GO_BP_MM_FORELIMB_MORPHOGENESIS	1/318	11/17799	0.179926	0.407826	0.318138	TBX3	1
GO_BP_MM_HEMOPOIETIC_STEM_CELL_PROLIFERATION	GO_BP_MM_HEMOPOIETIC_STEM_CELL_PROLIFERATION	1/318	11/17799	0.179926	0.407826	0.318138	CD34	1
GO_BP_MM_INDUCTION_OF_POSITIVE_CHEMOTAXIS	GO_BP_MM_INDUCTION_OF_POSITIVE_CHEMOTAXIS	1/318	11/17799	0.179926	0.407826	0.318138	VEGFC	1
GO_BP_MM_LIMB_BUD_FORMATION	GO_BP_MM_LIMB_BUD_FORMATION	1/318	11/17799	0.179926	0.407826	0.318138	SHH	1
GO_BP_MM_MAGNESIUM_ION_TRANSPORT	GO_BP_MM_MAGNESIUM_ION_TRANSPORT	1/318	11/17799	0.179926	0.407826	0.318138	NIPAL1	1
GO_BP_MM_MALE_SEX_DETERMINATION	GO_BP_MM_MALE_SEX_DETERMINATION	1/318	11/17799	0.179926	0.407826	0.318138	INSRR	1
GO_BP_MM_MAMMARY_GLAND_EPITHELIAL_CELL_DIFFERENTIATION	GO_BP_MM_MAMMARY_GLAND_EPITHELIAL_CELL_DIFFERENTIATION	1/318	11/17799	0.179926	0.407826	0.318138	ZFP703	1
GO_BP_MM_MYOTUBE_DIFFERENTIATION	GO_BP_MM_MYOTUBE_DIFFERENTIATION	1/318	11/17799	0.179926	0.407826	0.318138	SHH	1
GO_BP_MM_NEGATIVE_REGULATION_OF_CELL-SUBSTRATE_ADHESION	GO_BP_MM_NEGATIVE_REGULATION_OF_CELL-SUBSTRATE_ADHESION	1/318	11/17799	0.179926	0.407826	0.318138	COL1A1	1
GO_BP_MM_NEGATIVE_REGULATION_OF_FIBROBLAST_GROWTH_FACTOR_RECEPTOR_SIGNALING_PATHWAY	GO_BP_MM_NEGATIVE_REGULATION_OF_FIBROBLAST_GROWTH_FACTOR_RECEPTOR_SIGNALING_PATHWAY	1/318	11/17799	0.179926	0.407826	0.318138	SULF1	1
GO_BP_MM_NEGATIVE_REGULATION_OF_LIPID_STORAGE	GO_BP_MM_NEGATIVE_REGULATION_OF_LIPID_STORAGE	1/318	11/17799	0.179926	0.407826	0.318138	ABCG1	1
GO_BP_MM_NEGATIVE_REGULATION_OF_T_CELL_RECEPTOR_SIGNALING_PATHWAY	GO_BP_MM_NEGATIVE_REGULATION_OF_T_CELL_RECEPTOR_SIGNALING_PATHWAY	1/318	11/17799	0.179926	0.407826	0.318138	THY1	1
GO_BP_MM_NEGATIVE_REGULATION_OF_VASCULAR_PERMEABILITY	GO_BP_MM_NEGATIVE_REGULATION_OF_VASCULAR_PERMEABILITY	1/318	11/17799	0.179926	0.407826	0.318138	ADM	1
GO_BP_MM_OVULATION	GO_BP_MM_OVULATION	1/318	11/17799	0.179926	0.407826	0.318138	PTGS2	1
GO_BP_MM_OVULATION_CYCLE	GO_BP_MM_OVULATION_CYCLE	1/318	11/17799	0.179926	0.407826	0.318138	AXL	1
GO_BP_MM_POSITIVE_REGULATION_OF_CARTILAGE_DEVELOPMENT	GO_BP_MM_POSITIVE_REGULATION_OF_CARTILAGE_DEVELOPMENT	1/318	11/17799	0.179926	0.407826	0.318138	BMP4	1
GO_BP_MM_POSITIVE_REGULATION_OF_CHOLESTEROL_EFFLUX	GO_BP_MM_POSITIVE_REGULATION_OF_CHOLESTEROL_EFFLUX	1/318	11/17799	0.179926	0.407826	0.318138	ABCG1	1
GO_BP_MM_POSITIVE_REGULATION_OF_DNA_DAMAGE_RESPONSE_SIGNAL_TRANSDUCTION_BY_P53_CLASS_MEDIATOR	GO_BP_MM_POSITIVE_REGULATION_OF_DNA_DAMAGE_RESPONSE_SIGNAL_TRANSDUCTION_BY_P53_CLASS_MEDIATOR	1/318	11/17799	0.179926	0.407826	0.318138	HIC1	1
GO_BP_MM_POSITIVE_REGULATION_OF_MEMBRANE_PROTEIN_ECTODOMAIN_PROTEOLYSIS	GO_BP_MM_POSITIVE_REGULATION_OF_MEMBRANE_PROTEIN_ECTODOMAIN_PROTEOLYSIS	1/318	11/17799	0.179926	0.407826	0.318138	TNFRSF1B	1
GO_BP_MM_POSITIVE_REGULATION_OF_MYOBLAST_DIFFERENTIATION	GO_BP_MM_POSITIVE_REGULATION_OF_MYOBLAST_DIFFERENTIATION	1/318	11/17799	0.179926	0.407826	0.318138	IGFBP3	1
GO_BP_MM_POSITIVE_REGULATION_OF_PROTEIN_AUTOPHOSPHORYLATION	GO_BP_MM_POSITIVE_REGULATION_OF_PROTEIN_AUTOPHOSPHORYLATION	1/318	11/17799	0.179926	0.407826	0.318138	VEGFC	1
GO_BP_MM_POSITIVE_THYMIC_T_CELL_SELECTION	GO_BP_MM_POSITIVE_THYMIC_T_CELL_SELECTION	1/318	11/17799	0.179926	0.407826	0.318138	SHH	1
GO_BP_MM_RESPONSE_TO_MANGANESE_ION	GO_BP_MM_RESPONSE_TO_MANGANESE_ION	1/318	11/17799	0.179926	0.407826	0.318138	PTGS2	1
GO_BP_MM_RESPONSE_TO_MOLECULE_OF_BACTERIAL_ORIGIN	GO_BP_MM_RESPONSE_TO_MOLECULE_OF_BACTERIAL_ORIGIN	1/318	11/17799	0.179926	0.407826	0.318138	CXCL2	1
GO_BP_MM_RESPONSE_TO_SELENIUM_ION	GO_BP_MM_RESPONSE_TO_SELENIUM_ION	1/318	11/17799	0.179926	0.407826	0.318138	GPX3	1
GO_BP_MM_SENSORY_PERCEPTION_OF_LIGHT_STIMULUS	GO_BP_MM_SENSORY_PERCEPTION_OF_LIGHT_STIMULUS	1/318	11/17799	0.179926	0.407826	0.318138	WHRN	1
GO_BP_MM_SKELETAL_MUSCLE_CELL_DIFFERENTIATION	GO_BP_MM_SKELETAL_MUSCLE_CELL_DIFFERENTIATION	1/318	11/17799	0.179926	0.407826	0.318138	MYLK2	1
GO_BP_MM_SURFACTANT_HOMEOSTASIS	GO_BP_MM_SURFACTANT_HOMEOSTASIS	1/318	11/17799	0.179926	0.407826	0.318138	NAPSA	1
GO_BP_MM_VAGINA_DEVELOPMENT	GO_BP_MM_VAGINA_DEVELOPMENT	1/318	11/17799	0.179926	0.407826	0.318138	AXL	1
GO_CC_MM_AXOLEMMA	GO_CC_MM_AXOLEMMA	1/318	11/17799	0.179926	0.407826	0.318138	SLC1A2	1
GO_MF_MM_ADENYLATE_CYCLASE_ACTIVITY	GO_MF_MM_ADENYLATE_CYCLASE_ACTIVITY	1/318	11/17799	0.179926	0.407826	0.318138	ADCY7	1
GO_MF_MM_ANKYRIN_BINDING	GO_MF_MM_ANKYRIN_BINDING	1/318	11/17799	0.179926	0.407826	0.318138	FLNC	1
GO_MF_MM_ENHANCER_SEQUENCE-SPECIFIC_DNA_BINDING	GO_MF_MM_ENHANCER_SEQUENCE-SPECIFIC_DNA_BINDING	1/318	11/17799	0.179926	0.407826	0.318138	GATA2	1
GO_MF_MM_GAMMA-CATENIN_BINDING	GO_MF_MM_GAMMA-CATENIN_BINDING	1/318	11/17799	0.179926	0.407826	0.318138	PTPRT	1
GO_MF_MM_INSULIN_RECEPTOR_SUBSTRATE_BINDING	GO_MF_MM_INSULIN_RECEPTOR_SUBSTRATE_BINDING	1/318	11/17799	0.179926	0.407826	0.318138	INSRR	1
GO_MF_MM_NEUROPEPTIDE_Y_RECEPTOR_ACTIVITY	GO_MF_MM_NEUROPEPTIDE_Y_RECEPTOR_ACTIVITY	1/318	11/17799	0.179926	0.407826	0.318138	NPY1R	1
GO_MF_MM_ORGANIC_ANION_TRANSMEMBRANE_TRANSPORTER_ACTIVITY	GO_MF_MM_ORGANIC_ANION_TRANSMEMBRANE_TRANSPORTER_ACTIVITY	1/318	11/17799	0.179926	0.407826	0.318138	SLCO2B1	1
GO_MF_MM_RETINOL_BINDING	GO_MF_MM_RETINOL_BINDING	1/318	11/17799	0.179926	0.407826	0.318138	RBP7	1
GO_CC_MM_NUCLEAR_MEMBRANE	GO_CC_MM_NUCLEAR_MEMBRANE	4/318	125/17799	0.185288	0.407826	0.318138	ATP2A3/SLC16A3/ALOX5/EDNRA	4
GO_BP_MM_CATION_TRANSPORT	GO_BP_MM_CATION_TRANSPORT	3/318	83/17799	0.18538	0.407826	0.318138	ATP2A3/SLC30A2/ATP2C2	3
GO_CC_MM_APICAL_PART_OF_CELL	GO_CC_MM_APICAL_PART_OF_CELL	3/318	83/17799	0.18538	0.407826	0.318138	DPEP1/ITGA8/ATP6V0A4	3
GO_BP_MM_RESPONSE_TO_HYDROGEN_PEROXIDE	GO_BP_MM_RESPONSE_TO_HYDROGEN_PEROXIDE	2/318	44/17799	0.185415	0.407826	0.318138	COL1A1/ADA	2
GO_MF_MM_HYDROLASE_ACTIVITY_ACTING_ON_ACID_ANHYDRIDES_CATALYZING_TRANSMEMBRANE_MOVEMENT_OF_SUBSTANCES	GO_MF_MM_HYDROLASE_ACTIVITY_ACTING_ON_ACID_ANHYDRIDES_CATALYZING_TRANSMEMBRANE_MOVEMENT_OF_SUBSTANCES	2/318	44/17799	0.185415	0.407826	0.318138	ATP2A3/ATP2C2	2
GO_BP_MM_NEGATIVE_REGULATION_OF_PROTEIN_KINASE_ACTIVITY	GO_BP_MM_NEGATIVE_REGULATION_OF_PROTEIN_KINASE_ACTIVITY	2/318	45/17799	0.191889	0.407826	0.318138	IL6/THY1	2
GO_CC_MM_TRANSCRIPTIONAL_REPRESSOR_COMPLEX	GO_CC_MM_TRANSCRIPTIONAL_REPRESSOR_COMPLEX	2/318	45/17799	0.191889	0.407826	0.318138	RUNX1T1/CORO2A	2
GO_BP_MM_ACROSOME_REACTION	GO_BP_MM_ACROSOME_REACTION	1/318	12/17799	0.194587	0.407826	0.318138	SYT8	1
GO_BP_MM_ACTIVATION_OF_PHOSPHOLIPASE_C_ACTIVITY	GO_BP_MM_ACTIVATION_OF_PHOSPHOLIPASE_C_ACTIVITY	1/318	12/17799	0.194587	0.407826	0.318138	ADCYAP1R1	1
GO_BP_MM_APOPTOTIC_CELL_CLEARANCE	GO_BP_MM_APOPTOTIC_CELL_CLEARANCE	1/318	12/17799	0.194587	0.407826	0.318138	AXL	1
GO_BP_MM_HYPOTHALAMUS_DEVELOPMENT	GO_BP_MM_HYPOTHALAMUS_DEVELOPMENT	1/318	12/17799	0.194587	0.407826	0.318138	ETS1	1
GO_BP_MM_L-GLUTAMATE_TRANSPORT	GO_BP_MM_L-GLUTAMATE_TRANSPORT	1/318	12/17799	0.194587	0.407826	0.318138	SLC1A2	1
GO_BP_MM_LYMPHANGIOGENESIS	GO_BP_MM_LYMPHANGIOGENESIS	1/318	12/17799	0.194587	0.407826	0.318138	SOX18	1
GO_BP_MM_MYELOID_DENDRITIC_CELL_DIFFERENTIATION	GO_BP_MM_MYELOID_DENDRITIC_CELL_DIFFERENTIATION	1/318	12/17799	0.194587	0.407826	0.318138	CSF2	1
GO_BP_MM_MYOBLAST_DIFFERENTIATION	GO_BP_MM_MYOBLAST_DIFFERENTIATION	1/318	12/17799	0.194587	0.407826	0.318138	SHH	1
GO_BP_MM_NATURAL_KILLER_CELL_DIFFERENTIATION	GO_BP_MM_NATURAL_KILLER_CELL_DIFFERENTIATION	1/318	12/17799	0.194587	0.407826	0.318138	AXL	1
GO_BP_MM_NEGATIVE_CHEMOTAXIS	GO_BP_MM_NEGATIVE_CHEMOTAXIS	1/318	12/17799	0.194587	0.407826	0.318138	NRP2	1
GO_BP_MM_NEGATIVE_REGULATION_OF_OLIGODENDROCYTE_DIFFERENTIATION	GO_BP_MM_NEGATIVE_REGULATION_OF_OLIGODENDROCYTE_DIFFERENTIATION	1/318	12/17799	0.194587	0.407826	0.318138	BMP4	1
GO_BP_MM_NEGATIVE_REGULATION_OF_T_CELL_ACTIVATION	GO_BP_MM_NEGATIVE_REGULATION_OF_T_CELL_ACTIVATION	1/318	12/17799	0.194587	0.407826	0.318138	LAX1	1
GO_BP_MM_NEGATIVE_REGULATION_OF_VIRAL_GENOME_REPLICATION	GO_BP_MM_NEGATIVE_REGULATION_OF_VIRAL_GENOME_REPLICATION	1/318	12/17799	0.194587	0.407826	0.318138	SLPI	1
GO_BP_MM_NEGATIVE_THYMIC_T_CELL_SELECTION	GO_BP_MM_NEGATIVE_THYMIC_T_CELL_SELECTION	1/318	12/17799	0.194587	0.407826	0.318138	SHH	1
GO_BP_MM_PHOSPHOLIPID_EFFLUX	GO_BP_MM_PHOSPHOLIPID_EFFLUX	1/318	12/17799	0.194587	0.407826	0.318138	ABCG1	1
GO_BP_MM_POSITIVE_REGULATION_OF_CALCIUM_ION_TRANSPORT_INTO_CYTOSOL	GO_BP_MM_POSITIVE_REGULATION_OF_CALCIUM_ION_TRANSPORT_INTO_CYTOSOL	1/318	12/17799	0.194587	0.407826	0.318138	ADCYAP1R1	1
GO_BP_MM_POSITIVE_REGULATION_OF_TYROSINE_PHOSPHORYLATION_OF_STAT5_PROTEIN	GO_BP_MM_POSITIVE_REGULATION_OF_TYROSINE_PHOSPHORYLATION_OF_STAT5_PROTEIN	1/318	12/17799	0.194587	0.407826	0.318138	CSF2	1
GO_BP_MM_REGULATION_OF_DENDRITE_MORPHOGENESIS	GO_BP_MM_REGULATION_OF_DENDRITE_MORPHOGENESIS	1/318	12/17799	0.194587	0.407826	0.318138	ACHE	1
GO_BP_MM_RESPONSE_TO_CAFFEINE	GO_BP_MM_RESPONSE_TO_CAFFEINE	1/318	12/17799	0.194587	0.407826	0.318138	IL6	1
GO_BP_MM_RESPONSE_TO_LIPID	GO_BP_MM_RESPONSE_TO_LIPID	1/318	12/17799	0.194587	0.407826	0.318138	ABCG1	1
GO_BP_MM_REVERSE_CHOLESTEROL_TRANSPORT	GO_BP_MM_REVERSE_CHOLESTEROL_TRANSPORT	1/318	12/17799	0.194587	0.407826	0.318138	ABCG1	1
GO_BP_MM_VERY_LONG-CHAIN_FATTY_ACID_METABOLIC_PROCESS	GO_BP_MM_VERY_LONG-CHAIN_FATTY_ACID_METABOLIC_PROCESS	1/318	12/17799	0.194587	0.407826	0.318138	ACSBG1	1
GO_CC_MM_CHYLOMICRON	GO_CC_MM_CHYLOMICRON	1/318	12/17799	0.194587	0.407826	0.318138	LPL	1
GO_CC_MM_FASCIA_ADHERENS	GO_CC_MM_FASCIA_ADHERENS	1/318	12/17799	0.194587	0.407826	0.318138	DES	1
GO_CC_MM_INTEGRAL_TO_LUMENAL_SIDE_OF_ENDOPLASMIC_RETICULUM_MEMBRANE	GO_CC_MM_INTEGRAL_TO_LUMENAL_SIDE_OF_ENDOPLASMIC_RETICULUM_MEMBRANE	1/318	12/17799	0.194587	0.407826	0.318138	H2-Q10	1
GO_MF_MM_ACETYLCHOLINE_BINDING	GO_MF_MM_ACETYLCHOLINE_BINDING	1/318	12/17799	0.194587	0.407826	0.318138	ACHE	1
GO_MF_MM_CARBOXY-LYASE_ACTIVITY	GO_MF_MM_CARBOXY-LYASE_ACTIVITY	1/318	12/17799	0.194587	0.407826	0.318138	DDC	1
GO_MF_MM_HYDROLASE_ACTIVITY_ACTING_ON_CARBON-NITROGEN_BUT_NOT_PEPTIDE_BONDS_IN_LINEAR_AMIDES	GO_MF_MM_HYDROLASE_ACTIVITY_ACTING_ON_CARBON-NITROGEN_BUT_NOT_PEPTIDE_BONDS_IN_LINEAR_AMIDES	1/318	12/17799	0.194587	0.407826	0.318138	VNN3	1
GO_MF_MM_RAS_GTPASE_BINDING	GO_MF_MM_RAS_GTPASE_BINDING	1/318	12/17799	0.194587	0.407826	0.318138	RASGRP3	1
GO_MF_MM_REGULATORY_REGION_DNA_BINDING	GO_MF_MM_REGULATORY_REGION_DNA_BINDING	1/318	12/17799	0.194587	0.407826	0.318138	RUNX1	1
GO_MF_MM_RNA_POLYMERASE_II_DISTAL_ENHANCER_SEQUENCE-SPECIFIC_DNA_BINDING	GO_MF_MM_RNA_POLYMERASE_II_DISTAL_ENHANCER_SEQUENCE-SPECIFIC_DNA_BINDING	1/318	12/17799	0.194587	0.407826	0.318138	GATA2	1
GO_MF_MM_SUBSTRATE-SPECIFIC_TRANSMEMBRANE_TRANSPORTER_ACTIVITY	GO_MF_MM_SUBSTRATE-SPECIFIC_TRANSMEMBRANE_TRANSPORTER_ACTIVITY	1/318	12/17799	0.194587	0.407826	0.318138	SLC2A6	1
GO_BP_MM_HEART_MORPHOGENESIS	GO_BP_MM_HEART_MORPHOGENESIS	2/318	46/17799	0.198393	0.407826	0.318138	TBX3/COL5A1	2
GO_BP_MM_POSITIVE_REGULATION_OF_CANONICAL_WNT_RECEPTOR_SIGNALING_PATHWAY	GO_BP_MM_POSITIVE_REGULATION_OF_CANONICAL_WNT_RECEPTOR_SIGNALING_PATHWAY	2/318	46/17799	0.198393	0.407826	0.318138	COL1A1/DKK2	2
GO_BP_MM_CELL_COMMUNICATION	GO_BP_MM_CELL_COMMUNICATION	3/318	86/17799	0.198994	0.407826	0.318138	SHH/GJB4/NCF4	3
GO_BP_MM_ANTI-APOPTOSIS	GO_BP_MM_ANTI-APOPTOSIS	4/318	130/17799	0.203476	0.407826	0.318138	TBX3/HGF/ETS1/CCL2	4
GO_BP_MM_REGULATION_OF_CELL_SHAPE	GO_BP_MM_REGULATION_OF_CELL_SHAPE	3/318	87/17799	0.203585	0.407826	0.318138	CCL11/IL6/CCL2	3
GO_BP_MM_ACUTE_INFLAMMATORY_RESPONSE	GO_BP_MM_ACUTE_INFLAMMATORY_RESPONSE	1/318	13/17799	0.208986	0.407826	0.318138	ALOX5	1
GO_BP_MM_ANATOMICAL_STRUCTURE_DEVELOPMENT	GO_BP_MM_ANATOMICAL_STRUCTURE_DEVELOPMENT	1/318	13/17799	0.208986	0.407826	0.318138	SHH	1
GO_BP_MM_BEHAVIORAL_RESPONSE_TO_PAIN	GO_BP_MM_BEHAVIORAL_RESPONSE_TO_PAIN	1/318	13/17799	0.208986	0.407826	0.318138	RUNX1	1
GO_BP_MM_CELL_FATE_DETERMINATION	GO_BP_MM_CELL_FATE_DETERMINATION	1/318	13/17799	0.208986	0.407826	0.318138	GATA2	1
GO_BP_MM_CELL_PROLIFERATION_IN_FOREBRAIN	GO_BP_MM_CELL_PROLIFERATION_IN_FOREBRAIN	1/318	13/17799	0.208986	0.407826	0.318138	WNT7B	1
GO_BP_MM_DIGESTION	GO_BP_MM_DIGESTION	1/318	13/17799	0.208986	0.407826	0.318138	PGC	1
GO_BP_MM_EXCRETION	GO_BP_MM_EXCRETION	1/318	13/17799	0.208986	0.407826	0.318138	ATP6V0A4	1
GO_BP_MM_HEMOPOIETIC_PROGENITOR_CELL_DIFFERENTIATION	GO_BP_MM_HEMOPOIETIC_PROGENITOR_CELL_DIFFERENTIATION	1/318	13/17799	0.208986	0.407826	0.318138	BMP4	1
GO_BP_MM_HYDROGEN_PEROXIDE_CATABOLIC_PROCESS	GO_BP_MM_HYDROGEN_PEROXIDE_CATABOLIC_PROCESS	1/318	13/17799	0.208986	0.407826	0.318138	GPX3	1
GO_BP_MM_LEYDIG_CELL_DIFFERENTIATION	GO_BP_MM_LEYDIG_CELL_DIFFERENTIATION	1/318	13/17799	0.208986	0.407826	0.318138	PDGFRA	1
GO_BP_MM_MORPHOGENESIS_OF_EMBRYONIC_EPITHELIUM	GO_BP_MM_MORPHOGENESIS_OF_EMBRYONIC_EPITHELIUM	1/318	13/17799	0.208986	0.407826	0.318138	VEGFC	1
GO_BP_MM_NEGATIVE_REGULATION_OF_CHONDROCYTE_DIFFERENTIATION	GO_BP_MM_NEGATIVE_REGULATION_OF_CHONDROCYTE_DIFFERENTIATION	1/318	13/17799	0.208986	0.407826	0.318138	BMP4	1
GO_BP_MM_NEGATIVE_REGULATION_OF_GLUCONEOGENESIS	GO_BP_MM_NEGATIVE_REGULATION_OF_GLUCONEOGENESIS	1/318	13/17799	0.208986	0.407826	0.318138	IL6	1
GO_BP_MM_POSITIVE_REGULATION_OF_ENDOCYTOSIS	GO_BP_MM_POSITIVE_REGULATION_OF_ENDOCYTOSIS	1/318	13/17799	0.208986	0.407826	0.318138	CLIP3	1
GO_BP_MM_POSITIVE_REGULATION_OF_SURVIVAL_GENE_PRODUCT_EXPRESSION	GO_BP_MM_POSITIVE_REGULATION_OF_SURVIVAL_GENE_PRODUCT_EXPRESSION	1/318	13/17799	0.208986	0.407826	0.318138	CSF2	1
GO_BP_MM_POSITIVE_REGULATION_OF_SYNAPTIC_TRANSMISSION	GO_BP_MM_POSITIVE_REGULATION_OF_SYNAPTIC_TRANSMISSION	1/318	13/17799	0.208986	0.407826	0.318138	CCL2	1
GO_BP_MM_POSITIVE_REGULATION_OF_T_CELL_DIFFERENTIATION	GO_BP_MM_POSITIVE_REGULATION_OF_T_CELL_DIFFERENTIATION	1/318	13/17799	0.208986	0.407826	0.318138	ADA	1
GO_BP_MM_POSITIVE_REGULATION_OF_VASODILATION	GO_BP_MM_POSITIVE_REGULATION_OF_VASODILATION	1/318	13/17799	0.208986	0.407826	0.318138	ADM	1
GO_BP_MM_REGULATION_OF_SODIUM_ION_TRANSPORT	GO_BP_MM_REGULATION_OF_SODIUM_ION_TRANSPORT	1/318	13/17799	0.208986	0.407826	0.318138	SCNN1B	1
GO_BP_MM_RESPONSE_TO_ACID	GO_BP_MM_RESPONSE_TO_ACID	1/318	13/17799	0.208986	0.407826	0.318138	CES2C	1
GO_BP_MM_SYNAPTIC_TRANSMISSION_CHOLINERGIC	GO_BP_MM_SYNAPTIC_TRANSMISSION_CHOLINERGIC	1/318	13/17799	0.208986	0.407826	0.318138	ACHE	1
GO_CC_MM_DENDRITE_CYTOPLASM	GO_CC_MM_DENDRITE_CYTOPLASM	1/318	13/17799	0.208986	0.407826	0.318138	ADA	1
GO_CC_MM_MYOSIN_FILAMENT	GO_CC_MM_MYOSIN_FILAMENT	1/318	13/17799	0.208986	0.407826	0.318138	MYH7B	1
GO_CC_MM_PHAGOCYTIC_CUP	GO_CC_MM_PHAGOCYTIC_CUP	1/318	13/17799	0.208986	0.407826	0.318138	LCP1	1
GO_CC_MM_PORE_COMPLEX	GO_CC_MM_PORE_COMPLEX	1/318	13/17799	0.208986	0.407826	0.318138	ASPN	1
GO_CC_MM_PROTON-TRANSPORTING_TWO-SECTOR_ATPASE_COMPLEX_PROTON-TRANSPORTING_DOMAIN	GO_CC_MM_PROTON-TRANSPORTING_TWO-SECTOR_ATPASE_COMPLEX_PROTON-TRANSPORTING_DOMAIN	1/318	13/17799	0.208986	0.407826	0.318138	ATP6V0A4	1
GO_MF_MM_CHOLESTEROL_TRANSPORTER_ACTIVITY	GO_MF_MM_CHOLESTEROL_TRANSPORTER_ACTIVITY	1/318	13/17799	0.208986	0.407826	0.318138	ABCG1	1
GO_MF_MM_HYDROGEN-EXPORTING_ATPASE_ACTIVITY_PHOSPHORYLATIVE_MECHANISM	GO_MF_MM_HYDROGEN-EXPORTING_ATPASE_ACTIVITY_PHOSPHORYLATIVE_MECHANISM	1/318	13/17799	0.208986	0.407826	0.318138	ATP6V0A4	1
GO_MF_MM_LONG-CHAIN_FATTY_ACID-COA_LIGASE_ACTIVITY	GO_MF_MM_LONG-CHAIN_FATTY_ACID-COA_LIGASE_ACTIVITY	1/318	13/17799	0.208986	0.407826	0.318138	ACSBG1	1
GO_MF_MM_LOW-DENSITY_LIPOPROTEIN_PARTICLE_BINDING	GO_MF_MM_LOW-DENSITY_LIPOPROTEIN_PARTICLE_BINDING	1/318	13/17799	0.208986	0.407826	0.318138	COLEC12	1
GO_MF_MM_OXYGEN_TRANSPORTER_ACTIVITY	GO_MF_MM_OXYGEN_TRANSPORTER_ACTIVITY	1/318	13/17799	0.208986	0.407826	0.318138	CYGB	1
GO_MF_MM_QUINONE_BINDING	GO_MF_MM_QUINONE_BINDING	1/318	13/17799	0.208986	0.407826	0.318138	HHIP	1
GO_MF_MM_THIOLESTER_HYDROLASE_ACTIVITY	GO_MF_MM_THIOLESTER_HYDROLASE_ACTIVITY	1/318	13/17799	0.208986	0.407826	0.318138	PTPRT	1
GO_BP_MM_FAT_CELL_DIFFERENTIATION	GO_BP_MM_FAT_CELL_DIFFERENTIATION	2/318	48/17799	0.211476	0.407826	0.318138	RUNX1T1/CLIP3	2
GO_CC_MM_PRESYNAPTIC_MEMBRANE	GO_CC_MM_PRESYNAPTIC_MEMBRANE	2/318	48/17799	0.211476	0.407826	0.318138	SLC1A2/ACHE	2
GO_BP_MM_REGULATION_OF_CELL_CYCLE	GO_BP_MM_REGULATION_OF_CELL_CYCLE	3/318	89/17799	0.212839	0.407826	0.318138	MYLK2/PTGS2/ZFP703	3
GO_MF_MM_MICROTUBULE_BINDING	GO_MF_MM_MICROTUBULE_BINDING	3/318	89/17799	0.212839	0.407826	0.318138	CLIP3/GLI1/CCDC88B	3
GO_MF_MM_ELECTRON_CARRIER_ACTIVITY	GO_MF_MM_ELECTRON_CARRIER_ACTIVITY	5/318	178/17799	0.213793	0.407826	0.318138	PTGIS/CYP2E1/CYP1A1/CYP2F2/CYP2C68	5
GO_BP_MM_REGULATION_OF_GENE_EXPRESSION	GO_BP_MM_REGULATION_OF_GENE_EXPRESSION	3/318	90/17799	0.2175	0.407826	0.318138	SHH/CSF2/BMP4	3
GO_CC_MM_ENDOSOME_MEMBRANE	GO_CC_MM_ENDOSOME_MEMBRANE	3/318	90/17799	0.2175	0.407826	0.318138	CD68/SLC30A2/RET	3
GO_MF_MM_PROTEASE_BINDING	GO_MF_MM_PROTEASE_BINDING	2/318	49/17799	0.21805	0.407826	0.318138	ADAMTS4/ECM1	2
GO_CC_MM_INTEGRAL_TO_PLASMA_MEMBRANE	GO_CC_MM_INTEGRAL_TO_PLASMA_MEMBRANE	8/318	322/17799	0.21974	0.407826	0.318138	SLC1A2/NTRK1/PDGFRA/GPNMB/RET/IGSF10/EPHA3/HHIP	8
GO_BP_MM_ADULT_BEHAVIOR	GO_BP_MM_ADULT_BEHAVIOR	1/318	14/17799	0.223129	0.407826	0.318138	SLC1A2	1
GO_BP_MM_AXIS_SPECIFICATION	GO_BP_MM_AXIS_SPECIFICATION	1/318	14/17799	0.223129	0.407826	0.318138	WNT7B	1
GO_BP_MM_CALCIUM_ION_HOMEOSTASIS	GO_BP_MM_CALCIUM_ION_HOMEOSTASIS	1/318	14/17799	0.223129	0.407826	0.318138	ADM	1
GO_BP_MM_CARDIAC_MUSCLE_TISSUE_DEVELOPMENT	GO_BP_MM_CARDIAC_MUSCLE_TISSUE_DEVELOPMENT	1/318	14/17799	0.223129	0.407826	0.318138	ZFPM2	1
GO_BP_MM_CELLULAR_RESPONSE_TO_DEXAMETHASONE_STIMULUS	GO_BP_MM_CELLULAR_RESPONSE_TO_DEXAMETHASONE_STIMULUS	1/318	14/17799	0.223129	0.407826	0.318138	BMP4	1
GO_BP_MM_CENTRAL_NERVOUS_SYSTEM_NEURON_DEVELOPMENT	GO_BP_MM_CENTRAL_NERVOUS_SYSTEM_NEURON_DEVELOPMENT	1/318	14/17799	0.223129	0.407826	0.318138	GATA2	1
GO_BP_MM_CHONDROCYTE_DEVELOPMENT	GO_BP_MM_CHONDROCYTE_DEVELOPMENT	1/318	14/17799	0.223129	0.407826	0.318138	SULF1	1
GO_BP_MM_ESTABLISHMENT_OF_PROTEIN_LOCALIZATION	GO_BP_MM_ESTABLISHMENT_OF_PROTEIN_LOCALIZATION	1/318	14/17799	0.223129	0.407826	0.318138	ITGA8	1
GO_BP_MM_FOCAL_ADHESION_ASSEMBLY	GO_BP_MM_FOCAL_ADHESION_ASSEMBLY	1/318	14/17799	0.223129	0.407826	0.318138	THY1	1
GO_BP_MM_ION_TRANSMEMBRANE_TRANSPORT	GO_BP_MM_ION_TRANSMEMBRANE_TRANSPORT	1/318	14/17799	0.223129	0.407826	0.318138	TRPM5	1
GO_BP_MM_MESONEPHROS_DEVELOPMENT	GO_BP_MM_MESONEPHROS_DEVELOPMENT	1/318	14/17799	0.223129	0.407826	0.318138	BMP4	1
GO_BP_MM_MONOCYTE_DIFFERENTIATION	GO_BP_MM_MONOCYTE_DIFFERENTIATION	1/318	14/17799	0.223129	0.407826	0.318138	BMP4	1
GO_BP_MM_MUSCLE_CELL_HOMEOSTASIS	GO_BP_MM_MUSCLE_CELL_HOMEOSTASIS	1/318	14/17799	0.223129	0.407826	0.318138	IL6	1
GO_BP_MM_NEURAL_CREST_CELL_DEVELOPMENT	GO_BP_MM_NEURAL_CREST_CELL_DEVELOPMENT	1/318	14/17799	0.223129	0.407826	0.318138	EDNRA	1
GO_BP_MM_POSITIVE_REGULATION_OF_OSSIFICATION	GO_BP_MM_POSITIVE_REGULATION_OF_OSSIFICATION	1/318	14/17799	0.223129	0.407826	0.318138	BMP4	1
GO_BP_MM_POSITIVE_REGULATION_OF_VASCULAR_ENDOTHELIAL_GROWTH_FACTOR_RECEPTOR_SIGNALING_PATHWAY	GO_BP_MM_POSITIVE_REGULATION_OF_VASCULAR_ENDOTHELIAL_GROWTH_FACTOR_RECEPTOR_SIGNALING_PATHWAY	1/318	14/17799	0.223129	0.407826	0.318138	BMP4	1
GO_BP_MM_REGULATION_OF_MAPK_CASCADE	GO_BP_MM_REGULATION_OF_MAPK_CASCADE	1/318	14/17799	0.223129	0.407826	0.318138	MYLK2	1
GO_BP_MM_RESPONSE_TO_PH	GO_BP_MM_RESPONSE_TO_PH	1/318	14/17799	0.223129	0.407826	0.318138	ABCC8	1
GO_BP_MM_SEMAPHORIN-PLEXIN_SIGNALING_PATHWAY	GO_BP_MM_SEMAPHORIN-PLEXIN_SIGNALING_PATHWAY	1/318	14/17799	0.223129	0.407826	0.318138	NRP2	1
GO_BP_MM_SULFUR_COMPOUND_METABOLIC_PROCESS	GO_BP_MM_SULFUR_COMPOUND_METABOLIC_PROCESS	1/318	14/17799	0.223129	0.407826	0.318138	SULF1	1
GO_BP_MM_TISSUE_HOMEOSTASIS	GO_BP_MM_TISSUE_HOMEOSTASIS	1/318	14/17799	0.223129	0.407826	0.318138	CD34	1
GO_BP_MM_VENTRICULAR_SEPTUM_DEVELOPMENT	GO_BP_MM_VENTRICULAR_SEPTUM_DEVELOPMENT	1/318	14/17799	0.223129	0.407826	0.318138	STRA6	1
GO_BP_MM_WATER_TRANSPORT	GO_BP_MM_WATER_TRANSPORT	1/318	14/17799	0.223129	0.407826	0.318138	MYLK2	1
GO_BP_MM_ZINC_ION_TRANSMEMBRANE_TRANSPORT	GO_BP_MM_ZINC_ION_TRANSMEMBRANE_TRANSPORT	1/318	14/17799	0.223129	0.407826	0.318138	SLC30A2	1
GO_MF_MM_C2H2_ZINC_FINGER_DOMAIN_BINDING	GO_MF_MM_C2H2_ZINC_FINGER_DOMAIN_BINDING	1/318	14/17799	0.223129	0.407826	0.318138	GATA2	1
GO_MF_MM_CALCIUM-DEPENDENT_CYSTEINE-TYPE_ENDOPEPTIDASE_ACTIVITY	GO_MF_MM_CALCIUM-DEPENDENT_CYSTEINE-TYPE_ENDOPEPTIDASE_ACTIVITY	1/318	14/17799	0.223129	0.407826	0.318138	CAPN13	1
GO_MF_MM_EPHRIN_RECEPTOR_ACTIVITY	GO_MF_MM_EPHRIN_RECEPTOR_ACTIVITY	1/318	14/17799	0.223129	0.407826	0.318138	EPHA3	1
GO_MF_MM_FOLIC_ACID_BINDING	GO_MF_MM_FOLIC_ACID_BINDING	1/318	14/17799	0.223129	0.407826	0.318138	DMGDH	1
GO_MF_MM_GLUTATHIONE_PEROXIDASE_ACTIVITY	GO_MF_MM_GLUTATHIONE_PEROXIDASE_ACTIVITY	1/318	14/17799	0.223129	0.407826	0.318138	GPX3	1
GO_MF_MM_SELENIUM_BINDING	GO_MF_MM_SELENIUM_BINDING	1/318	14/17799	0.223129	0.407826	0.318138	GPX3	1
GO_MF_MM_ZINC_ION_TRANSMEMBRANE_TRANSPORTER_ACTIVITY	GO_MF_MM_ZINC_ION_TRANSMEMBRANE_TRANSPORTER_ACTIVITY	1/318	14/17799	0.223129	0.407826	0.318138	SLC30A2	1
GO_BP_MM_CELL_FATE_COMMITMENT	GO_BP_MM_CELL_FATE_COMMITMENT	2/318	50/17799	0.224641	0.409904	0.319759	SHH/BMP4	2
GO_CC_MM_ENDOSOME	GO_CC_MM_ENDOSOME	4/318	136/17799	0.225955	0.411615	0.321094	ACE/ABCG1/ADCYAP1R1/ATP6V0A4	4
GO_MF_MM_ACTIN_BINDING	GO_MF_MM_ACTIN_BINDING	7/318	277/17799	0.22778	0.413332	0.322434	LSP1/ACE/AVIL/CORO2A/PLS1/FLNC/MYH7B	7
GO_CC_MM_VOLTAGE-GATED_POTASSIUM_CHANNEL_COMPLEX	GO_CC_MM_VOLTAGE-GATED_POTASSIUM_CHANNEL_COMPLEX	2/318	51/17799	0.231247	0.413332	0.322434	ABCC8/KCNS3	2
GO_BP_MM_PROTEIN_HOMOOLIGOMERIZATION	GO_BP_MM_PROTEIN_HOMOOLIGOMERIZATION	4/318	138/17799	0.233587	0.413332	0.322434	THBS4/KCNS3/KCTD14/C1QTNF7	4
GO_BP_MM_NEURON_DIFFERENTIATION	GO_BP_MM_NEURON_DIFFERENTIATION	3/318	94/17799	0.236344	0.413332	0.322434	GATA2/WNT7B/RUNX1	3
GO_MF_MM_TRANSMEMBRANE_SIGNALING_RECEPTOR_ACTIVITY	GO_MF_MM_TRANSMEMBRANE_SIGNALING_RECEPTOR_ACTIVITY	3/318	94/17799	0.236344	0.413332	0.322434	CD44/ADCYAP1R1/THBD	3
GO_BP_MM_BONE_REMODELING	GO_BP_MM_BONE_REMODELING	1/318	15/17799	0.23702	0.413332	0.322434	IL6	1
GO_BP_MM_ENTERIC_NERVOUS_SYSTEM_DEVELOPMENT	GO_BP_MM_ENTERIC_NERVOUS_SYSTEM_DEVELOPMENT	1/318	15/17799	0.23702	0.413332	0.322434	RET	1
GO_BP_MM_LONG-CHAIN_FATTY_ACID_METABOLIC_PROCESS	GO_BP_MM_LONG-CHAIN_FATTY_ACID_METABOLIC_PROCESS	1/318	15/17799	0.23702	0.413332	0.322434	ACSBG1	1
GO_BP_MM_NEGATIVE_REGULATION_OF_MYELOID_CELL_DIFFERENTIATION	GO_BP_MM_NEGATIVE_REGULATION_OF_MYELOID_CELL_DIFFERENTIATION	1/318	15/17799	0.23702	0.413332	0.322434	GATA2	1
GO_BP_MM_NEGATIVE_REGULATION_OF_NOTCH_SIGNALING_PATHWAY	GO_BP_MM_NEGATIVE_REGULATION_OF_NOTCH_SIGNALING_PATHWAY	1/318	15/17799	0.23702	0.413332	0.322434	GATA2	1
GO_BP_MM_NEUROMUSCULAR_SYNAPTIC_TRANSMISSION	GO_BP_MM_NEUROMUSCULAR_SYNAPTIC_TRANSMISSION	1/318	15/17799	0.23702	0.413332	0.322434	MYLK2	1
GO_BP_MM_ORGAN_INDUCTION	GO_BP_MM_ORGAN_INDUCTION	1/318	15/17799	0.23702	0.413332	0.322434	BMP4	1
GO_BP_MM_POSITIVE_REGULATION_OF_CELL_CYCLE_ARREST	GO_BP_MM_POSITIVE_REGULATION_OF_CELL_CYCLE_ARREST	1/318	15/17799	0.23702	0.413332	0.322434	DDR2	1
GO_BP_MM_POSITIVE_REGULATION_OF_SYNAPTIC_TRANSMISSION_GLUTAMATERGIC	GO_BP_MM_POSITIVE_REGULATION_OF_SYNAPTIC_TRANSMISSION_GLUTAMATERGIC	1/318	15/17799	0.23702	0.413332	0.322434	PTGS2	1
GO_BP_MM_REGULATION_OF_NEURON_APOPTOTIC_PROCESS	GO_BP_MM_REGULATION_OF_NEURON_APOPTOTIC_PROCESS	1/318	15/17799	0.23702	0.413332	0.322434	EGLN3	1
GO_BP_MM_RESPONSE_TO_FOOD	GO_BP_MM_RESPONSE_TO_FOOD	1/318	15/17799	0.23702	0.413332	0.322434	CYP1A1	1
GO_BP_MM_SEX_DIFFERENTIATION	GO_BP_MM_SEX_DIFFERENTIATION	1/318	15/17799	0.23702	0.413332	0.322434	TCF21	1
GO_BP_MM_STRIATED_MUSCLE_CELL_DIFFERENTIATION	GO_BP_MM_STRIATED_MUSCLE_CELL_DIFFERENTIATION	1/318	15/17799	0.23702	0.413332	0.322434	SHH	1
GO_BP_MM_TRIGLYCERIDE_HOMEOSTASIS	GO_BP_MM_TRIGLYCERIDE_HOMEOSTASIS	1/318	15/17799	0.23702	0.413332	0.322434	LPL	1
GO_BP_MM_TROPHECTODERMAL_CELL_DIFFERENTIATION	GO_BP_MM_TROPHECTODERMAL_CELL_DIFFERENTIATION	1/318	15/17799	0.23702	0.413332	0.322434	ADA	1
GO_BP_MM_UROGENITAL_SYSTEM_DEVELOPMENT	GO_BP_MM_UROGENITAL_SYSTEM_DEVELOPMENT	1/318	15/17799	0.23702	0.413332	0.322434	GATA2	1
GO_MF_MM_PHOSPHATIDYLSERINE_BINDING	GO_MF_MM_PHOSPHATIDYLSERINE_BINDING	1/318	15/17799	0.23702	0.413332	0.322434	AXL	1
GO_MF_MM_PROTEIN_KINASE_C_ACTIVITY	GO_MF_MM_PROTEIN_KINASE_C_ACTIVITY	1/318	15/17799	0.23702	0.413332	0.322434	PRKCG	1
GO_MF_MM_RETINYL-PALMITATE_ESTERASE_ACTIVITY	GO_MF_MM_RETINYL-PALMITATE_ESTERASE_ACTIVITY	1/318	15/17799	0.23702	0.413332	0.322434	CES1G	1
GO_MF_MM_RHO_GTPASE_ACTIVATOR_ACTIVITY	GO_MF_MM_RHO_GTPASE_ACTIVATOR_ACTIVITY	1/318	15/17799	0.23702	0.413332	0.322434	THY1	1
GO_MF_MM_TRANSMEMBRANE_RECEPTOR_PROTEIN_SERINE_THREONINE_KINASE_ACTIVITY	GO_MF_MM_TRANSMEMBRANE_RECEPTOR_PROTEIN_SERINE_THREONINE_KINASE_ACTIVITY	1/318	15/17799	0.23702	0.413332	0.322434	PSCA	1
GO_BP_MM_CELLULAR_RESPONSE_TO_MECHANICAL_STIMULUS	GO_BP_MM_CELLULAR_RESPONSE_TO_MECHANICAL_STIMULUS	2/318	52/17799	0.237865	0.413332	0.322434	COL1A1/EDNRA	2
GO_BP_MM_PROTEIN_HOMOTETRAMERIZATION	GO_BP_MM_PROTEIN_HOMOTETRAMERIZATION	2/318	52/17799	0.237865	0.413332	0.322434	GPX3/CDA	2
GO_MF_MM_CYTOSKELETAL_PROTEIN_BINDING	GO_MF_MM_CYTOSKELETAL_PROTEIN_BINDING	2/318	52/17799	0.237865	0.413332	0.322434	DES/FLNC	2
GO_BP_MM_RESPONSE_TO_PEPTIDE_HORMONE_STIMULUS	GO_BP_MM_RESPONSE_TO_PEPTIDE_HORMONE_STIMULUS	3/318	96/17799	0.245872	0.420206	0.327796	COL1A1/ANXA1/IL6RA	3
GO_MF_MM_PROTEIN_TYROSINE_KINASE_ACTIVITY	GO_MF_MM_PROTEIN_TYROSINE_KINASE_ACTIVITY	11/318	483/17799	0.247487	0.420206	0.327796	AXL/INSRR/TRIB2/DDR2/MYLK2/NTRK1/PDGFRA/RET/MST1R/EPHA3/PRKCG	11
GO_BP_MM_CELL-CELL_JUNCTION_ORGANIZATION	GO_BP_MM_CELL-CELL_JUNCTION_ORGANIZATION	1/318	16/17799	0.250663	0.420206	0.327796	CLDN1	1
GO_BP_MM_CELLULAR_RESPONSE_TO_STRESS	GO_BP_MM_CELLULAR_RESPONSE_TO_STRESS	1/318	16/17799	0.250663	0.420206	0.327796	KRT20	1
GO_BP_MM_CHOLESTEROL_TRANSPORT	GO_BP_MM_CHOLESTEROL_TRANSPORT	1/318	16/17799	0.250663	0.420206	0.327796	ABCG1	1
GO_BP_MM_COGNITION	GO_BP_MM_COGNITION	1/318	16/17799	0.250663	0.420206	0.327796	STRA6	1
GO_BP_MM_DEFENSE_RESPONSE_TO_PROTOZOAN	GO_BP_MM_DEFENSE_RESPONSE_TO_PROTOZOAN	1/318	16/17799	0.250663	0.420206	0.327796	IL6	1
GO_BP_MM_EMBRYONIC_HEMOPOIESIS	GO_BP_MM_EMBRYONIC_HEMOPOIESIS	1/318	16/17799	0.250663	0.420206	0.327796	RUNX1	1
GO_BP_MM_MATERNAL_PROCESS_INVOLVED_IN_FEMALE_PREGNANCY	GO_BP_MM_MATERNAL_PROCESS_INVOLVED_IN_FEMALE_PREGNANCY	1/318	16/17799	0.250663	0.420206	0.327796	LIF	1
GO_BP_MM_NEGATIVE_REGULATION_OF_OSTEOCLAST_DIFFERENTIATION	GO_BP_MM_NEGATIVE_REGULATION_OF_OSTEOCLAST_DIFFERENTIATION	1/318	16/17799	0.250663	0.420206	0.327796	LRRC17	1
GO_BP_MM_NEURAL_TUBE_FORMATION	GO_BP_MM_NEURAL_TUBE_FORMATION	1/318	16/17799	0.250663	0.420206	0.327796	SHH	1
GO_BP_MM_PHOSPHATIDYLINOSITOL_3-KINASE_CASCADE	GO_BP_MM_PHOSPHATIDYLINOSITOL_3-KINASE_CASCADE	1/318	16/17799	0.250663	0.420206	0.327796	PIK3CG	1
GO_BP_MM_POSITIVE_REGULATION_OF_BLOOD_VESSEL_ENDOTHELIAL_CELL_MIGRATION	GO_BP_MM_POSITIVE_REGULATION_OF_BLOOD_VESSEL_ENDOTHELIAL_CELL_MIGRATION	1/318	16/17799	0.250663	0.420206	0.327796	VEGFC	1
GO_BP_MM_POSITIVE_REGULATION_OF_COLLAGEN_BIOSYNTHETIC_PROCESS	GO_BP_MM_POSITIVE_REGULATION_OF_COLLAGEN_BIOSYNTHETIC_PROCESS	1/318	16/17799	0.250663	0.420206	0.327796	BMP4	1
GO_BP_MM_REGULATION_OF_PHOSPHORYLATION	GO_BP_MM_REGULATION_OF_PHOSPHORYLATION	1/318	16/17799	0.250663	0.420206	0.327796	SRPX2	1
GO_BP_MM_RESPONSE_TO_GROWTH_FACTOR_STIMULUS	GO_BP_MM_RESPONSE_TO_GROWTH_FACTOR_STIMULUS	1/318	16/17799	0.250663	0.420206	0.327796	LUM	1
GO_BP_MM_RESPONSE_TO_VITAMIN_A	GO_BP_MM_RESPONSE_TO_VITAMIN_A	1/318	16/17799	0.250663	0.420206	0.327796	CYP1A1	1
GO_BP_MM_SIGNAL_TRANSDUCTION_INVOLVED_IN_REGULATION_OF_GENE_EXPRESSION	GO_BP_MM_SIGNAL_TRANSDUCTION_INVOLVED_IN_REGULATION_OF_GENE_EXPRESSION	1/318	16/17799	0.250663	0.420206	0.327796	PDGFRA	1
GO_BP_MM_SPHINGOLIPID_METABOLIC_PROCESS	GO_BP_MM_SPHINGOLIPID_METABOLIC_PROCESS	1/318	16/17799	0.250663	0.420206	0.327796	FA2H	1
GO_CC_MM_CONTRACTILE_FIBER	GO_CC_MM_CONTRACTILE_FIBER	1/318	16/17799	0.250663	0.420206	0.327796	DES	1
GO_MF_MM_GAMMA-TUBULIN_BINDING	GO_MF_MM_GAMMA-TUBULIN_BINDING	1/318	16/17799	0.250663	0.420206	0.327796	NDN	1
GO_MF_MM_SULFURIC_ESTER_HYDROLASE_ACTIVITY	GO_MF_MM_SULFURIC_ESTER_HYDROLASE_ACTIVITY	1/318	16/17799	0.250663	0.420206	0.327796	SULF1	1
GO_MF_MM_TRIGLYCERIDE_LIPASE_ACTIVITY	GO_MF_MM_TRIGLYCERIDE_LIPASE_ACTIVITY	1/318	16/17799	0.250663	0.420206	0.327796	LPL	1
GO_BP_MM_DEFENSE_RESPONSE_TO_VIRUS	GO_BP_MM_DEFENSE_RESPONSE_TO_VIRUS	2/318	55/17799	0.257766	0.431453	0.336569	IFITM1/IL6	2
GO_CC_MM_MEMBRANE_FRACTION	GO_CC_MM_MEMBRANE_FRACTION	9/318	389/17799	0.261622	0.432632	0.337489	SHH/SLC1A2/ACE/NPR3/RGS16/ENG/SCNN1B/RAC2/WHRN	9
GO_BP_MM_ACTIVATION_OF_ADENYLATE_CYCLASE_ACTIVITY	GO_BP_MM_ACTIVATION_OF_ADENYLATE_CYCLASE_ACTIVITY	1/318	17/17799	0.264062	0.432632	0.337489	ADCY7	1
GO_BP_MM_ANTERIOR_POSTERIOR_AXIS_SPECIFICATION	GO_BP_MM_ANTERIOR_POSTERIOR_AXIS_SPECIFICATION	1/318	17/17799	0.264062	0.432632	0.337489	BMP4	1
GO_BP_MM_CELLULAR_RESPONSE_TO_LITHIUM_ION	GO_BP_MM_CELLULAR_RESPONSE_TO_LITHIUM_ION	1/318	17/17799	0.264062	0.432632	0.337489	SHH	1
GO_BP_MM_NEUROMUSCULAR_PROCESS	GO_BP_MM_NEUROMUSCULAR_PROCESS	1/318	17/17799	0.264062	0.432632	0.337489	STRA6	1
GO_BP_MM_NITROGEN_COMPOUND_METABOLIC_PROCESS	GO_BP_MM_NITROGEN_COMPOUND_METABOLIC_PROCESS	1/318	17/17799	0.264062	0.432632	0.337489	VNN3	1
GO_BP_MM_POSITIVE_REGULATION_OF_INTERLEUKIN-10_PRODUCTION	GO_BP_MM_POSITIVE_REGULATION_OF_INTERLEUKIN-10_PRODUCTION	1/318	17/17799	0.264062	0.432632	0.337489	CD34	1
GO_BP_MM_POSITIVE_REGULATION_OF_REACTIVE_OXYGEN_SPECIES_METABOLIC_PROCESS	GO_BP_MM_POSITIVE_REGULATION_OF_REACTIVE_OXYGEN_SPECIES_METABOLIC_PROCESS	1/318	17/17799	0.264062	0.432632	0.337489	DUOXA1	1
GO_BP_MM_RESPONSE_TO_BIOTIC_STIMULUS	GO_BP_MM_RESPONSE_TO_BIOTIC_STIMULUS	1/318	17/17799	0.264062	0.432632	0.337489	IFITM1	1
GO_BP_MM_RESPONSE_TO_STILBENOID	GO_BP_MM_RESPONSE_TO_STILBENOID	1/318	17/17799	0.264062	0.432632	0.337489	GSTA1	1
GO_CC_MM_STEREOCILIUM	GO_CC_MM_STEREOCILIUM	1/318	17/17799	0.264062	0.432632	0.337489	WHRN	1
GO_CC_MM_VERY-LOW-DENSITY_LIPOPROTEIN_PARTICLE	GO_CC_MM_VERY-LOW-DENSITY_LIPOPROTEIN_PARTICLE	1/318	17/17799	0.264062	0.432632	0.337489	LPL	1
GO_BP_MM_INNER_EAR_DEVELOPMENT	GO_BP_MM_INNER_EAR_DEVELOPMENT	2/318	56/17799	0.264408	0.432632	0.337489	SHH/PDGFRA	2
GO_CC_MM_EARLY_ENDOSOME_MEMBRANE	GO_CC_MM_EARLY_ENDOSOME_MEMBRANE	2/318	56/17799	0.264408	0.432632	0.337489	CLIP3/NTRK1	2
GO_MF_MM_RNA_POLYMERASE_II_CORE_PROMOTER_INVOLVED_IN_POSITIVE_REGULATION_OF_TRANSCRIPTION	GO_MF_MM_RNA_POLYMERASE_II_CORE_PROMOTER_INVOLVED_IN_POSITIVE_REGULATION_OF_TRANSCRIPTION	2/318	56/17799	0.264408	0.432632	0.337489	GATA2/TCF21	2
GO_BP_MM_SENSORY_PERCEPTION_OF_SOUND	GO_BP_MM_SENSORY_PERCEPTION_OF_SOUND	3/318	100/17799	0.265097	0.43311	0.337862	COL1A1/ATP6V0A4/WHRN	3
GO_BP_MM_DEFENSE_RESPONSE_TO_BACTERIUM	GO_BP_MM_DEFENSE_RESPONSE_TO_BACTERIUM	3/318	101/17799	0.269932	0.434728	0.339124	MMP7/HAMP/HAMP2	3
GO_BP_MM_PEPTIDYL-TYROSINE_PHOSPHORYLATION	GO_BP_MM_PEPTIDYL-TYROSINE_PHOSPHORYLATION	2/318	57/17799	0.271051	0.434728	0.339124	DDR2/PDGFRA	2
GO_MF_MM_VOLTAGE-GATED_POTASSIUM_CHANNEL_ACTIVITY	GO_MF_MM_VOLTAGE-GATED_POTASSIUM_CHANNEL_ACTIVITY	2/318	57/17799	0.271051	0.434728	0.339124	KCNS3/KCNE4	2
GO_MF_MM_ATPASE_ACTIVITY	GO_MF_MM_ATPASE_ACTIVITY	4/318	148/17799	0.272587	0.434728	0.339124	ABCG1/ABCC8/ABCA9/ABCA8A	4
GO_MF_MM_NUCLEOSIDE-TRIPHOSPHATASE_ACTIVITY	GO_MF_MM_NUCLEOSIDE-TRIPHOSPHATASE_ACTIVITY	4/318	148/17799	0.272587	0.434728	0.339124	ABCG1/ABCC8/ABCA9/ABCA8A	4
GO_BP_MM_ADENYLATE_CYCLASE-INHIBITING_G-PROTEIN_COUPLED_RECEPTOR_SIGNALING_PATHWAY	GO_BP_MM_ADENYLATE_CYCLASE-INHIBITING_G-PROTEIN_COUPLED_RECEPTOR_SIGNALING_PATHWAY	1/318	18/17799	0.277223	0.434728	0.339124	NPR3	1
GO_BP_MM_BEHAVIORAL_FEAR_RESPONSE	GO_BP_MM_BEHAVIORAL_FEAR_RESPONSE	1/318	18/17799	0.277223	0.434728	0.339124	PENK	1
GO_BP_MM_CELLULAR_RESPONSE_TO_GLUCOCORTICOID_STIMULUS	GO_BP_MM_CELLULAR_RESPONSE_TO_GLUCOCORTICOID_STIMULUS	1/318	18/17799	0.277223	0.434728	0.339124	ANXA1	1
GO_BP_MM_CELLULAR_RESPONSE_TO_INTERFERON-BETA	GO_BP_MM_CELLULAR_RESPONSE_TO_INTERFERON-BETA	1/318	18/17799	0.277223	0.434728	0.339124	IFI203	1
GO_BP_MM_DNA_DAMAGE_RESPONSE_SIGNAL_TRANSDUCTION_RESULTING_IN_INDUCTION_OF_APOPTOSIS	GO_BP_MM_DNA_DAMAGE_RESPONSE_SIGNAL_TRANSDUCTION_RESULTING_IN_INDUCTION_OF_APOPTOSIS	1/318	18/17799	0.277223	0.434728	0.339124	HIC1	1
GO_BP_MM_INACTIVATION_OF_MAPK_ACTIVITY	GO_BP_MM_INACTIVATION_OF_MAPK_ACTIVITY	1/318	18/17799	0.277223	0.434728	0.339124	LAX1	1
GO_BP_MM_MITOTIC_CELL_CYCLE	GO_BP_MM_MITOTIC_CELL_CYCLE	1/318	18/17799	0.277223	0.434728	0.339124	CDH13	1
GO_BP_MM_NEGATIVE_REGULATION_OF_PHOSPHORYLATION	GO_BP_MM_NEGATIVE_REGULATION_OF_PHOSPHORYLATION	1/318	18/17799	0.277223	0.434728	0.339124	BMP4	1
GO_BP_MM_POSITIVE_REGULATION_OF_CALCIUM_ION_TRANSPORT	GO_BP_MM_POSITIVE_REGULATION_OF_CALCIUM_ION_TRANSPORT	1/318	18/17799	0.277223	0.434728	0.339124	EDNRA	1
GO_BP_MM_POSITIVE_REGULATION_OF_CALCIUM-MEDIATED_SIGNALING	GO_BP_MM_POSITIVE_REGULATION_OF_CALCIUM-MEDIATED_SIGNALING	1/318	18/17799	0.277223	0.434728	0.339124	ADA	1
GO_BP_MM_POSITIVE_REGULATION_OF_CELL_DEATH	GO_BP_MM_POSITIVE_REGULATION_OF_CELL_DEATH	1/318	18/17799	0.277223	0.434728	0.339124	BMP4	1
GO_BP_MM_POSITIVE_REGULATION_OF_SYNAPSE_ASSEMBLY	GO_BP_MM_POSITIVE_REGULATION_OF_SYNAPSE_ASSEMBLY	1/318	18/17799	0.277223	0.434728	0.339124	THBS2	1
GO_BP_MM_POSITIVE_REGULATION_OF_TRANSFORMING_GROWTH_FACTOR_BETA_RECEPTOR_SIGNALING_PATHWAY	GO_BP_MM_POSITIVE_REGULATION_OF_TRANSFORMING_GROWTH_FACTOR_BETA_RECEPTOR_SIGNALING_PATHWAY	1/318	18/17799	0.277223	0.434728	0.339124	ITGA8	1
GO_BP_MM_PROTEIN_LOCALIZATION_AT_CELL_SURFACE	GO_BP_MM_PROTEIN_LOCALIZATION_AT_CELL_SURFACE	1/318	18/17799	0.277223	0.434728	0.339124	FBLN5	1
GO_BP_MM_REGULATION_OF_AXONOGENESIS	GO_BP_MM_REGULATION_OF_AXONOGENESIS	1/318	18/17799	0.277223	0.434728	0.339124	ACHE	1
GO_BP_MM_REGULATION_OF_MUSCLE_CONTRACTION	GO_BP_MM_REGULATION_OF_MUSCLE_CONTRACTION	1/318	18/17799	0.277223	0.434728	0.339124	MYLK2	1
GO_BP_MM_REGULATION_OF_THE_FORCE_OF_HEART_CONTRACTION	GO_BP_MM_REGULATION_OF_THE_FORCE_OF_HEART_CONTRACTION	1/318	18/17799	0.277223	0.434728	0.339124	ADM	1
GO_BP_MM_RESPONSE_TO_VITAMIN_D	GO_BP_MM_RESPONSE_TO_VITAMIN_D	1/318	18/17799	0.277223	0.434728	0.339124	PTGS2	1
GO_BP_MM_SMAD_PROTEIN_SIGNAL_TRANSDUCTION	GO_BP_MM_SMAD_PROTEIN_SIGNAL_TRANSDUCTION	1/318	18/17799	0.277223	0.434728	0.339124	BMP4	1
GO_BP_MM_TUMOR_NECROSIS_FACTOR-MEDIATED_SIGNALING_PATHWAY	GO_BP_MM_TUMOR_NECROSIS_FACTOR-MEDIATED_SIGNALING_PATHWAY	1/318	18/17799	0.277223	0.434728	0.339124	TNFRSF1B	1
GO_MF_MM_CHOLESTEROL_BINDING	GO_MF_MM_CHOLESTEROL_BINDING	1/318	18/17799	0.277223	0.434728	0.339124	APOD	1
GO_MF_MM_ENDOPEPTIDASE_INHIBITOR_ACTIVITY	GO_MF_MM_ENDOPEPTIDASE_INHIBITOR_ACTIVITY	1/318	18/17799	0.277223	0.434728	0.339124	RECK	1
GO_MF_MM_L-ASCORBIC_ACID_BINDING	GO_MF_MM_L-ASCORBIC_ACID_BINDING	1/318	18/17799	0.277223	0.434728	0.339124	EGLN3	1
GO_CC_MM_TIGHT_JUNCTION	GO_CC_MM_TIGHT_JUNCTION	3/318	103/17799	0.279633	0.437878	0.341581	ESAM/CLDN1/ADCYAP1R1	3
GO_BP_MM_RESPONSE_TO_CALCIUM_ION	GO_BP_MM_RESPONSE_TO_CALCIUM_ION	2/318	59/17799	0.284328	0.444165	0.346486	IL6/MGP	2
GO_BP_MM_CAMERA-TYPE_EYE_MORPHOGENESIS	GO_BP_MM_CAMERA-TYPE_EYE_MORPHOGENESIS	1/318	19/17799	0.29015	0.444165	0.346486	BMP4	1
GO_BP_MM_CARTILAGE_CONDENSATION	GO_BP_MM_CARTILAGE_CONDENSATION	1/318	19/17799	0.29015	0.444165	0.346486	SULF1	1
GO_BP_MM_ESTABLISHMENT_OF_CELL_POLARITY	GO_BP_MM_ESTABLISHMENT_OF_CELL_POLARITY	1/318	19/17799	0.29015	0.444165	0.346486	SHH	1
GO_BP_MM_PHOSPHOLIPID_TRANSPORT	GO_BP_MM_PHOSPHOLIPID_TRANSPORT	1/318	19/17799	0.29015	0.444165	0.346486	ABCG1	1
GO_BP_MM_POSITIVE_REGULATION_OF_PROTEIN_SECRETION	GO_BP_MM_POSITIVE_REGULATION_OF_PROTEIN_SECRETION	1/318	19/17799	0.29015	0.444165	0.346486	VEGFC	1
GO_BP_MM_POSITIVE_REGULATION_OF_RAC_GTPASE_ACTIVITY	GO_BP_MM_POSITIVE_REGULATION_OF_RAC_GTPASE_ACTIVITY	1/318	19/17799	0.29015	0.444165	0.346486	CCL11	1
GO_BP_MM_REGULATION_OF_PH	GO_BP_MM_REGULATION_OF_PH	1/318	19/17799	0.29015	0.444165	0.346486	ATP6V0A4	1
GO_BP_MM_RESPONSE_TO_LIGHT_STIMULUS	GO_BP_MM_RESPONSE_TO_LIGHT_STIMULUS	1/318	19/17799	0.29015	0.444165	0.346486	SLC1A2	1
GO_BP_MM_RESPONSE_TO_REACTIVE_OXYGEN_SPECIES	GO_BP_MM_RESPONSE_TO_REACTIVE_OXYGEN_SPECIES	1/318	19/17799	0.29015	0.444165	0.346486	APOD	1
GO_BP_MM_SYMPATHETIC_NERVOUS_SYSTEM_DEVELOPMENT	GO_BP_MM_SYMPATHETIC_NERVOUS_SYSTEM_DEVELOPMENT	1/318	19/17799	0.29015	0.444165	0.346486	NTRK1	1
GO_MF_MM_ADP_BINDING	GO_MF_MM_ADP_BINDING	1/318	19/17799	0.29015	0.444165	0.346486	ABCG1	1
GO_MF_MM_BHLH_TRANSCRIPTION_FACTOR_BINDING	GO_MF_MM_BHLH_TRANSCRIPTION_FACTOR_BINDING	1/318	19/17799	0.29015	0.444165	0.346486	TCF21	1
GO_MF_MM_FIBROBLAST_GROWTH_FACTOR_BINDING	GO_MF_MM_FIBROBLAST_GROWTH_FACTOR_BINDING	1/318	19/17799	0.29015	0.444165	0.346486	FGFBP1	1
GO_MF_MM_PANCREATIC_RIBONUCLEASE_ACTIVITY	GO_MF_MM_PANCREATIC_RIBONUCLEASE_ACTIVITY	1/318	19/17799	0.29015	0.444165	0.346486	RNASE1	1
GO_MF_MM_WW_DOMAIN_BINDING	GO_MF_MM_WW_DOMAIN_BINDING	1/318	19/17799	0.29015	0.444165	0.346486	SCNN1B	1
GO_BP_MM_AXON_GUIDANCE	GO_BP_MM_AXON_GUIDANCE	3/318	106/17799	0.294241	0.449169	0.35039	SHH/LAMA2/NRP2	3
GO_MF_MM_HORMONE_ACTIVITY	GO_MF_MM_HORMONE_ACTIVITY	3/318	106/17799	0.294241	0.449169	0.35039	ADM/HAMP/HAMP2	3
GO_CC_MM_PERINUCLEAR_REGION_OF_CYTOPLASM	GO_CC_MM_PERINUCLEAR_REGION_OF_CYTOPLASM	9/318	404/17799	0.297527	0.450354	0.351314	NEURL1A/CD34/APOD/ACHE/THBS3/CDH13/PHEX/RASGRP3/PRKCG	9
GO_BP_MM_ENDOCYTOSIS	GO_BP_MM_ENDOCYTOSIS	3/318	107/17799	0.299122	0.450354	0.351314	SHH/PIK3CG/MRC2	3
GO_BP_MM_CELL_FATE_SPECIFICATION	GO_BP_MM_CELL_FATE_SPECIFICATION	1/318	20/17799	0.302846	0.450354	0.351314	SHH	1
GO_BP_MM_LEUKOCYTE_MIGRATION	GO_BP_MM_LEUKOCYTE_MIGRATION	1/318	20/17799	0.302846	0.450354	0.351314	CD34	1
GO_BP_MM_LIMB_DEVELOPMENT	GO_BP_MM_LIMB_DEVELOPMENT	1/318	20/17799	0.302846	0.450354	0.351314	SHH	1
GO_BP_MM_NEGATIVE_REGULATION_OF_ERK1_AND_ERK2_CASCADE	GO_BP_MM_NEGATIVE_REGULATION_OF_ERK1_AND_ERK2_CASCADE	1/318	20/17799	0.302846	0.450354	0.351314	LIF	1
GO_BP_MM_NEGATIVE_REGULATION_OF_NEUROGENESIS	GO_BP_MM_NEGATIVE_REGULATION_OF_NEUROGENESIS	1/318	20/17799	0.302846	0.450354	0.351314	WNT7B	1
GO_BP_MM_NEGATIVE_REGULATION_OF_PROTEIN_UBIQUITINATION	GO_BP_MM_NEGATIVE_REGULATION_OF_PROTEIN_UBIQUITINATION	1/318	20/17799	0.302846	0.450354	0.351314	PRKCG	1
GO_BP_MM_OLIGODENDROCYTE_DIFFERENTIATION	GO_BP_MM_OLIGODENDROCYTE_DIFFERENTIATION	1/318	20/17799	0.302846	0.450354	0.351314	SHH	1
GO_BP_MM_PROTON_TRANSPORT	GO_BP_MM_PROTON_TRANSPORT	1/318	20/17799	0.302846	0.450354	0.351314	ATP6V0A4	1
GO_CC_MM_CONNEXON_COMPLEX	GO_CC_MM_CONNEXON_COMPLEX	1/318	20/17799	0.302846	0.450354	0.351314	GJB4	1
GO_CC_MM_SARCOMERE	GO_CC_MM_SARCOMERE	1/318	20/17799	0.302846	0.450354	0.351314	MMP2	1
GO_MF_MM_FERRIC_IRON_BINDING	GO_MF_MM_FERRIC_IRON_BINDING	1/318	20/17799	0.302846	0.450354	0.351314	LTF	1
GO_MF_MM_GALACTOSYLTRANSFERASE_ACTIVITY	GO_MF_MM_GALACTOSYLTRANSFERASE_ACTIVITY	1/318	20/17799	0.302846	0.450354	0.351314	B3GNT3	1
GO_MF_MM_HORMONE_BINDING	GO_MF_MM_HORMONE_BINDING	1/318	20/17799	0.302846	0.450354	0.351314	NPR3	1
GO_MF_MM_HYDROLASE_ACTIVITY_ACTING_ON_CARBON-NITROGEN_BUT_NOT_PEPTIDE_BONDS	GO_MF_MM_HYDROLASE_ACTIVITY_ACTING_ON_CARBON-NITROGEN_BUT_NOT_PEPTIDE_BONDS	1/318	20/17799	0.302846	0.450354	0.351314	VNN3	1
GO_MF_MM_MRNA_3-UTR_BINDING	GO_MF_MM_MRNA_3-UTR_BINDING	1/318	20/17799	0.302846	0.450354	0.351314	IGF2BP2	1
GO_MF_MM_RNA_POLYMERASE_II_REGULATORY_REGION_SEQUENCE-SPECIFIC_DNA_BINDING	GO_MF_MM_RNA_POLYMERASE_II_REGULATORY_REGION_SEQUENCE-SPECIFIC_DNA_BINDING	1/318	20/17799	0.302846	0.450354	0.351314	TBX20	1
GO_MF_MM_RNA_POLYMERASE_II_TRANSCRIPTION_COACTIVATOR_ACTIVITY	GO_MF_MM_RNA_POLYMERASE_II_TRANSCRIPTION_COACTIVATOR_ACTIVITY	1/318	20/17799	0.302846	0.450354	0.351314	TBX20	1
GO_BP_MM_NEGATIVE_REGULATION_OF_CELL_GROWTH	GO_BP_MM_NEGATIVE_REGULATION_OF_CELL_GROWTH	3/318	108/17799	0.304008	0.451134	0.351922	GNG4/CDA/RERG	3
GO_BP_MM_GLUCOSE_METABOLIC_PROCESS	GO_BP_MM_GLUCOSE_METABOLIC_PROCESS	2/318	62/17799	0.304196	0.451134	0.351922	APOD/NPY1R	2
GO_BP_MM_RESPONSE_TO_OXIDATIVE_STRESS	GO_BP_MM_RESPONSE_TO_OXIDATIVE_STRESS	3/318	109/17799	0.308897	0.45527	0.355149	GPX3/CYGB/PTGS2	3
GO_BP_MM_NEURAL_TUBE_CLOSURE	GO_BP_MM_NEURAL_TUBE_CLOSURE	2/318	63/17799	0.310798	0.45527	0.355149	BMP4/ADM	2
GO_MF_MM_HISTONE_DEACETYLASE_BINDING	GO_MF_MM_HISTONE_DEACETYLASE_BINDING	2/318	63/17799	0.310798	0.45527	0.355149	HIC1/TCF21	2
GO_BP_MM_ACTIN_FILAMENT_BUNDLE_ASSEMBLY	GO_BP_MM_ACTIN_FILAMENT_BUNDLE_ASSEMBLY	1/318	21/17799	0.315315	0.45527	0.355149	LCP1	1
GO_BP_MM_AMINO_ACID_TRANSPORT	GO_BP_MM_AMINO_ACID_TRANSPORT	1/318	21/17799	0.315315	0.45527	0.355149	SLC6A14	1
GO_BP_MM_CHOLESTEROL_EFFLUX	GO_BP_MM_CHOLESTEROL_EFFLUX	1/318	21/17799	0.315315	0.45527	0.355149	ABCG1	1
GO_BP_MM_CYCLIC_NUCLEOTIDE_BIOSYNTHETIC_PROCESS	GO_BP_MM_CYCLIC_NUCLEOTIDE_BIOSYNTHETIC_PROCESS	1/318	21/17799	0.315315	0.45527	0.355149	ADCY7	1
GO_BP_MM_ERK1_AND_ERK2_CASCADE	GO_BP_MM_ERK1_AND_ERK2_CASCADE	1/318	21/17799	0.315315	0.45527	0.355149	CCL11	1
GO_BP_MM_FEMALE_GONAD_DEVELOPMENT	GO_BP_MM_FEMALE_GONAD_DEVELOPMENT	1/318	21/17799	0.315315	0.45527	0.355149	PDGFRA	1
GO_BP_MM_HINDBRAIN_DEVELOPMENT	GO_BP_MM_HINDBRAIN_DEVELOPMENT	1/318	21/17799	0.315315	0.45527	0.355149	SHH	1
GO_BP_MM_HOMEOSTASIS_OF_NUMBER_OF_CELLS_WITHIN_A_TISSUE	GO_BP_MM_HOMEOSTASIS_OF_NUMBER_OF_CELLS_WITHIN_A_TISSUE	1/318	21/17799	0.315315	0.45527	0.355149	GATA2	1
GO_BP_MM_MESODERM_DEVELOPMENT	GO_BP_MM_MESODERM_DEVELOPMENT	1/318	21/17799	0.315315	0.45527	0.355149	SNAI1	1
GO_BP_MM_NEGATIVE_REGULATION_OF_SIGNAL_TRANSDUCTION	GO_BP_MM_NEGATIVE_REGULATION_OF_SIGNAL_TRANSDUCTION	1/318	21/17799	0.315315	0.45527	0.355149	HHIP	1
GO_BP_MM_NEGATIVE_REGULATION_OF_T_CELL_PROLIFERATION	GO_BP_MM_NEGATIVE_REGULATION_OF_T_CELL_PROLIFERATION	1/318	21/17799	0.315315	0.45527	0.355149	SHH	1
GO_BP_MM_THYROID_GLAND_DEVELOPMENT	GO_BP_MM_THYROID_GLAND_DEVELOPMENT	1/318	21/17799	0.315315	0.45527	0.355149	SHH	1
GO_CC_MM_ANCHORED_TO_PLASMA_MEMBRANE	GO_CC_MM_ANCHORED_TO_PLASMA_MEMBRANE	1/318	21/17799	0.315315	0.45527	0.355149	THY1	1
GO_MF_MM_CADHERIN_BINDING	GO_MF_MM_CADHERIN_BINDING	1/318	21/17799	0.315315	0.45527	0.355149	PTPRT	1
GO_MF_MM_CALCIUM-DEPENDENT_PHOSPHOLIPID_BINDING	GO_MF_MM_CALCIUM-DEPENDENT_PHOSPHOLIPID_BINDING	1/318	21/17799	0.315315	0.45527	0.355149	ANXA1	1
GO_MF_MM_CATION_TRANSMEMBRANE_TRANSPORTER_ACTIVITY	GO_MF_MM_CATION_TRANSMEMBRANE_TRANSPORTER_ACTIVITY	1/318	21/17799	0.315315	0.45527	0.355149	SLC30A2	1
GO_MF_MM_NEUROTRANSMITTER-SODIUM_SYMPORTER_ACTIVITY	GO_MF_MM_NEUROTRANSMITTER-SODIUM_SYMPORTER_ACTIVITY	1/318	21/17799	0.315315	0.45527	0.355149	SLC6A14	1
GO_BP_MM_CELLULAR_CALCIUM_ION_HOMEOSTASIS	GO_BP_MM_CELLULAR_CALCIUM_ION_HOMEOSTASIS	2/318	64/17799	0.317387	0.457657	0.357011	NDN/CCL2	2
GO_BP_MM_HEMOPOIESIS	GO_BP_MM_HEMOPOIESIS	2/318	65/17799	0.323961	0.460779	0.359446	CD34/RUNX1	2
GO_CC_MM_Z_DISC	GO_CC_MM_Z_DISC	2/318	65/17799	0.323961	0.460779	0.359446	DES/FLNC	2
GO_BP_MM_NEGATIVE_REGULATION_OF_TRANSCRIPTION_DNA-DEPENDENT	GO_BP_MM_NEGATIVE_REGULATION_OF_TRANSCRIPTION_DNA-DEPENDENT	9/318	416/17799	0.327089	0.460779	0.359446	TBX3/BMP4/ZFPM2/DKK3/TBX20/SNAI1/SOX18/PRDM6/ZFP703	9
GO_BP_MM_CYTOKINE_PRODUCTION	GO_BP_MM_CYTOKINE_PRODUCTION	1/318	22/17799	0.327562	0.460779	0.359446	CXCL5	1
GO_BP_MM_CYTOLYSIS	GO_BP_MM_CYTOLYSIS	1/318	22/17799	0.327562	0.460779	0.359446	FGL2	1
GO_BP_MM_MYELOID_CELL_DIFFERENTIATION	GO_BP_MM_MYELOID_CELL_DIFFERENTIATION	1/318	22/17799	0.327562	0.460779	0.359446	RUNX1	1
GO_BP_MM_NEGATIVE_REGULATION_OF_PROTEIN_BINDING	GO_BP_MM_NEGATIVE_REGULATION_OF_PROTEIN_BINDING	1/318	22/17799	0.327562	0.460779	0.359446	SLPI	1
GO_BP_MM_OLIGODENDROCYTE_DEVELOPMENT	GO_BP_MM_OLIGODENDROCYTE_DEVELOPMENT	1/318	22/17799	0.327562	0.460779	0.359446	SHH	1
GO_BP_MM_POSITIVE_REGULATION_OF_BRANCHING_INVOLVED_IN_URETERIC_BUD_MORPHOGENESIS	GO_BP_MM_POSITIVE_REGULATION_OF_BRANCHING_INVOLVED_IN_URETERIC_BUD_MORPHOGENESIS	1/318	22/17799	0.327562	0.460779	0.359446	BMP4	1
GO_BP_MM_POSITIVE_REGULATION_OF_ENDOTHELIAL_CELL_MIGRATION	GO_BP_MM_POSITIVE_REGULATION_OF_ENDOTHELIAL_CELL_MIGRATION	1/318	22/17799	0.327562	0.460779	0.359446	BMP4	1
GO_BP_MM_POSITIVE_REGULATION_OF_PHOSPHATIDYLINOSITOL_3-KINASE_ACTIVITY	GO_BP_MM_POSITIVE_REGULATION_OF_PHOSPHATIDYLINOSITOL_3-KINASE_ACTIVITY	1/318	22/17799	0.327562	0.460779	0.359446	PDGFRA	1
GO_BP_MM_PROTEIN_TETRAMERIZATION	GO_BP_MM_PROTEIN_TETRAMERIZATION	1/318	22/17799	0.327562	0.460779	0.359446	ACHE	1
GO_BP_MM_RESPONSE_TO_ELECTRICAL_STIMULUS	GO_BP_MM_RESPONSE_TO_ELECTRICAL_STIMULUS	1/318	22/17799	0.327562	0.460779	0.359446	IL6	1
GO_BP_MM_SYNAPSE_ORGANIZATION	GO_BP_MM_SYNAPSE_ORGANIZATION	1/318	22/17799	0.327562	0.460779	0.359446	WNT7B	1
GO_CC_MM_PHOTORECEPTOR_CONNECTING_CILIUM	GO_CC_MM_PHOTORECEPTOR_CONNECTING_CILIUM	1/318	22/17799	0.327562	0.460779	0.359446	WHRN	1
GO_CC_MM_PHOTORECEPTOR_INNER_SEGMENT	GO_CC_MM_PHOTORECEPTOR_INNER_SEGMENT	1/318	22/17799	0.327562	0.460779	0.359446	WHRN	1
GO_MF_MM_CYSTEINE-TYPE_ENDOPEPTIDASE_INHIBITOR_ACTIVITY_INVOLVED_IN_APOPTOTIC_PROCESS	GO_MF_MM_CYSTEINE-TYPE_ENDOPEPTIDASE_INHIBITOR_ACTIVITY_INVOLVED_IN_APOPTOTIC_PROCESS	1/318	22/17799	0.327562	0.460779	0.359446	DPEP1	1
GO_MF_MM_PHOSPHORUS-OXYGEN_LYASE_ACTIVITY	GO_MF_MM_PHOSPHORUS-OXYGEN_LYASE_ACTIVITY	1/318	22/17799	0.327562	0.460779	0.359446	ADCY7	1
GO_MF_MM_STRUCTURAL_CONSTITUENT_OF_EYE_LENS	GO_MF_MM_STRUCTURAL_CONSTITUENT_OF_EYE_LENS	1/318	22/17799	0.327562	0.460779	0.359446	BFSP1	1
GO_BP_MM_MAPK_CASCADE	GO_BP_MM_MAPK_CASCADE	2/318	66/17799	0.33052	0.464342	0.362226	RET/CCL2	2
GO_MF_MM_HYDROLASE_ACTIVITY	GO_MF_MM_HYDROLASE_ACTIVITY	7/318	316/17799	0.335939	0.471032	0.367444	ACHE/CDA/CES1F/CES2E/NOTUM/CES1G/CES2C	7
GO_BP_MM_POSITIVE_REGULATION_OF_SEQUENCE-SPECIFIC_DNA_BINDING_TRANSCRIPTION_FACTOR_ACTIVITY	GO_BP_MM_POSITIVE_REGULATION_OF_SEQUENCE-SPECIFIC_DNA_BINDING_TRANSCRIPTION_FACTOR_ACTIVITY	2/318	67/17799	0.33706	0.471032	0.367444	IL6/DDR2	2
GO_BP_MM_CARBOHYDRATE_TRANSPORT	GO_BP_MM_CARBOHYDRATE_TRANSPORT	1/318	23/17799	0.339591	0.471032	0.367444	SLC2A6	1
GO_BP_MM_CELL_DEVELOPMENT	GO_BP_MM_CELL_DEVELOPMENT	1/318	23/17799	0.339591	0.471032	0.367444	SHH	1
GO_BP_MM_GLUCOSE_TRANSPORT	GO_BP_MM_GLUCOSE_TRANSPORT	1/318	23/17799	0.339591	0.471032	0.367444	EDNRA	1
GO_BP_MM_POSITIVE_REGULATION_OF_FAT_CELL_DIFFERENTIATION	GO_BP_MM_POSITIVE_REGULATION_OF_FAT_CELL_DIFFERENTIATION	1/318	23/17799	0.339591	0.471032	0.367444	WIF1	1
GO_CC_MM_SARCOPLASMIC_RETICULUM_MEMBRANE	GO_CC_MM_SARCOPLASMIC_RETICULUM_MEMBRANE	1/318	23/17799	0.339591	0.471032	0.367444	ATP2A3	1
GO_MF_MM_FRIZZLED_BINDING	GO_MF_MM_FRIZZLED_BINDING	1/318	23/17799	0.339591	0.471032	0.367444	WNT7B	1
GO_MF_MM_ION_CHANNEL_BINDING	GO_MF_MM_ION_CHANNEL_BINDING	1/318	23/17799	0.339591	0.471032	0.367444	ABCC8	1
GO_MF_MM_RNA_POLYMERASE_II_ACTIVATING_TRANSCRIPTION_FACTOR_BINDING	GO_MF_MM_RNA_POLYMERASE_II_ACTIVATING_TRANSCRIPTION_FACTOR_BINDING	1/318	23/17799	0.339591	0.471032	0.367444	TBX20	1
GO_BP_MM_INNER_EAR_MORPHOGENESIS	GO_BP_MM_INNER_EAR_MORPHOGENESIS	2/318	68/17799	0.343581	0.474766	0.370357	GATA2/ITGA8	2
GO_CC_MM_NUCLEAR_MATRIX	GO_CC_MM_NUCLEAR_MATRIX	2/318	68/17799	0.343581	0.474766	0.370357	ALOX5/NDN	2
GO_BP_MM_APOPTOTIC_PROCESS	GO_BP_MM_APOPTOTIC_PROCESS	10/318	476/17799	0.346072	0.474766	0.370357	SHH/SULF1/LSP1/SRGN/FAM3B/PGLYRP1/EGLN3/KRT20/TNFRSF11B/NAIP6	10
GO_BP_MM_CELLULAR_RESPONSE_TO_INTERFERON-GAMMA	GO_BP_MM_CELLULAR_RESPONSE_TO_INTERFERON-GAMMA	1/318	24/17799	0.351405	0.474766	0.370357	CCL2	1
GO_BP_MM_EMBRYONIC_FORELIMB_MORPHOGENESIS	GO_BP_MM_EMBRYONIC_FORELIMB_MORPHOGENESIS	1/318	24/17799	0.351405	0.474766	0.370357	SHH	1
GO_BP_MM_IRON_ION_TRANSPORT	GO_BP_MM_IRON_ION_TRANSPORT	1/318	24/17799	0.351405	0.474766	0.370357	LTF	1
GO_BP_MM_NEGATIVE_REGULATION_OF_NEURON_PROJECTION_DEVELOPMENT	GO_BP_MM_NEGATIVE_REGULATION_OF_NEURON_PROJECTION_DEVELOPMENT	1/318	24/17799	0.351405	0.474766	0.370357	RUNX1T1	1
GO_BP_MM_PHOSPHOLIPASE_C-ACTIVATING_G-PROTEIN_COUPLED_RECEPTOR_SIGNALING_PATHWAY	GO_BP_MM_PHOSPHOLIPASE_C-ACTIVATING_G-PROTEIN_COUPLED_RECEPTOR_SIGNALING_PATHWAY	1/318	24/17799	0.351405	0.474766	0.370357	NPR3	1
GO_BP_MM_POSITIVE_REGULATION_OF_CELL_CYCLE	GO_BP_MM_POSITIVE_REGULATION_OF_CELL_CYCLE	1/318	24/17799	0.351405	0.474766	0.370357	TBX3	1
GO_BP_MM_POSITIVE_REGULATION_OF_RHO_GTPASE_ACTIVITY	GO_BP_MM_POSITIVE_REGULATION_OF_RHO_GTPASE_ACTIVITY	1/318	24/17799	0.351405	0.474766	0.370357	THY1	1
GO_BP_MM_PROXIMAL_DISTAL_PATTERN_FORMATION	GO_BP_MM_PROXIMAL_DISTAL_PATTERN_FORMATION	1/318	24/17799	0.351405	0.474766	0.370357	GLI1	1
GO_BP_MM_SUBSTRATE_ADHESION-DEPENDENT_CELL_SPREADING	GO_BP_MM_SUBSTRATE_ADHESION-DEPENDENT_CELL_SPREADING	1/318	24/17799	0.351405	0.474766	0.370357	AXL	1
GO_BP_MM_ZINC_ION_TRANSPORT	GO_BP_MM_ZINC_ION_TRANSPORT	1/318	24/17799	0.351405	0.474766	0.370357	SLC30A2	1
GO_MF_MM_3_5-CYCLIC-NUCLEOTIDE_PHOSPHODIESTERASE_ACTIVITY	GO_MF_MM_3_5-CYCLIC-NUCLEOTIDE_PHOSPHODIESTERASE_ACTIVITY	1/318	24/17799	0.351405	0.474766	0.370357	PDE9A	1
GO_MF_MM_AMINO_ACID_BINDING	GO_MF_MM_AMINO_ACID_BINDING	1/318	24/17799	0.351405	0.474766	0.370357	DDC	1
GO_MF_MM_ANDROGEN_RECEPTOR_BINDING	GO_MF_MM_ANDROGEN_RECEPTOR_BINDING	1/318	24/17799	0.351405	0.474766	0.370357	TCF21	1
GO_MF_MM_E-BOX_BINDING	GO_MF_MM_E-BOX_BINDING	1/318	24/17799	0.351405	0.474766	0.370357	TCF21	1
GO_MF_MM_EPHRIN_RECEPTOR_BINDING	GO_MF_MM_EPHRIN_RECEPTOR_BINDING	1/318	24/17799	0.351405	0.474766	0.370357	PIK3CG	1
GO_MF_MM_HISTONE-LYSINE_N-METHYLTRANSFERASE_ACTIVITY	GO_MF_MM_HISTONE-LYSINE_N-METHYLTRANSFERASE_ACTIVITY	1/318	24/17799	0.351405	0.474766	0.370357	PRDM6	1
GO_MF_MM_RNA_POLYMERASE_II_TRANSCRIPTION_FACTOR_BINDING	GO_MF_MM_RNA_POLYMERASE_II_TRANSCRIPTION_FACTOR_BINDING	1/318	24/17799	0.351405	0.474766	0.370357	TBX20	1
GO_MF_MM_SINGLE-STRANDED_RNA_BINDING	GO_MF_MM_SINGLE-STRANDED_RNA_BINDING	1/318	24/17799	0.351405	0.474766	0.370357	ANXA1	1
GO_BP_MM_ANTERIOR_POSTERIOR_PATTERN_SPECIFICATION	GO_BP_MM_ANTERIOR_POSTERIOR_PATTERN_SPECIFICATION	3/318	118/17799	0.352923	0.476228	0.371498	SHH/WNT7B/IFITM1	3
GO_BP_MM_CELL_DIFFERENTIATION	GO_BP_MM_CELL_DIFFERENTIATION	8/318	375/17799	0.355735	0.479431	0.373996	GATA2/TNFAIP2/ADCYAP1R1/MGP/NKD1/BMP5/SEMA3D/DMKN	8
GO_BP_MM_ACTIVATION_OF_MAPKK_ACTIVITY	GO_BP_MM_ACTIVATION_OF_MAPKK_ACTIVITY	1/318	25/17799	0.363009	0.481525	0.37563	BMP4	1
GO_BP_MM_B_CELL_ACTIVATION	GO_BP_MM_B_CELL_ACTIVATION	1/318	25/17799	0.363009	0.481525	0.37563	LAX1	1
GO_BP_MM_EATING_BEHAVIOR	GO_BP_MM_EATING_BEHAVIOR	1/318	25/17799	0.363009	0.481525	0.37563	ACE	1
GO_BP_MM_NEGATIVE_REGULATION_OF_BLOOD_PRESSURE	GO_BP_MM_NEGATIVE_REGULATION_OF_BLOOD_PRESSURE	1/318	25/17799	0.363009	0.481525	0.37563	VEGFC	1
GO_BP_MM_NEUROMUSCULAR_JUNCTION_DEVELOPMENT	GO_BP_MM_NEUROMUSCULAR_JUNCTION_DEVELOPMENT	1/318	25/17799	0.363009	0.481525	0.37563	TNC	1
GO_BP_MM_PLATELET-DERIVED_GROWTH_FACTOR_RECEPTOR_SIGNALING_PATHWAY	GO_BP_MM_PLATELET-DERIVED_GROWTH_FACTOR_RECEPTOR_SIGNALING_PATHWAY	1/318	25/17799	0.363009	0.481525	0.37563	PDGFRA	1
GO_BP_MM_RESPONSE_TO_CORTICOSTERONE_STIMULUS	GO_BP_MM_RESPONSE_TO_CORTICOSTERONE_STIMULUS	1/318	25/17799	0.363009	0.481525	0.37563	GPX3	1
GO_BP_MM_SPLEEN_DEVELOPMENT	GO_BP_MM_SPLEEN_DEVELOPMENT	1/318	25/17799	0.363009	0.481525	0.37563	TCF21	1
GO_CC_MM_T-TUBULE	GO_CC_MM_T-TUBULE	1/318	25/17799	0.363009	0.481525	0.37563	EDNRA	1
GO_MF_MM_ATPASE_BINDING	GO_MF_MM_ATPASE_BINDING	1/318	25/17799	0.363009	0.481525	0.37563	ATP6V0A4	1
GO_MF_MM_LYASE_ACTIVITY	GO_MF_MM_LYASE_ACTIVITY	1/318	25/17799	0.363009	0.481525	0.37563	DDC	1
GO_MF_MM_SYNTAXIN_BINDING	GO_MF_MM_SYNTAXIN_BINDING	1/318	25/17799	0.363009	0.481525	0.37563	ABCC8	1
GO_BP_MM_RESPONSE_TO_ESTROGEN_STIMULUS	GO_BP_MM_RESPONSE_TO_ESTROGEN_STIMULUS	2/318	71/17799	0.363016	0.481525	0.37563	PDGFRA/TNFRSF11B	2
GO_MF_MM_GTPASE_ACTIVATOR_ACTIVITY	GO_MF_MM_GTPASE_ACTIVATOR_ACTIVITY	3/318	122/17799	0.372411	0.492449	0.384151	RGS16/RAP1GAP2/RGS13	3
GO_BP_MM_ACTIVATION_OF_JUN_KINASE_ACTIVITY	GO_BP_MM_ACTIVATION_OF_JUN_KINASE_ACTIVITY	1/318	26/17799	0.374405	0.492449	0.384151	WNT7B	1
GO_BP_MM_REGULATION_OF_ACTIN_CYTOSKELETON_ORGANIZATION	GO_BP_MM_REGULATION_OF_ACTIN_CYTOSKELETON_ORGANIZATION	1/318	26/17799	0.374405	0.492449	0.384151	EPHA3	1
GO_BP_MM_REGULATION_OF_SIGNAL_TRANSDUCTION	GO_BP_MM_REGULATION_OF_SIGNAL_TRANSDUCTION	1/318	26/17799	0.374405	0.492449	0.384151	RUNX1	1
GO_BP_MM_REGULATION_OF_SYNAPTIC_PLASTICITY	GO_BP_MM_REGULATION_OF_SYNAPTIC_PLASTICITY	1/318	26/17799	0.374405	0.492449	0.384151	RASGRF1	1
GO_CC_MM_CYTOPLASMIC_PART	GO_CC_MM_CYTOPLASMIC_PART	1/318	26/17799	0.374405	0.492449	0.384151	SLC30A2	1
GO_MF_MM_WNT-PROTEIN_BINDING	GO_MF_MM_WNT-PROTEIN_BINDING	1/318	26/17799	0.374405	0.492449	0.384151	WIF1	1
GO_CC_MM_LYSOSOME	GO_CC_MM_LYSOSOME	4/318	174/17799	0.377422	0.495821	0.386782	NAPSA/CD34/ADA/CTSK	4
GO_BP_MM_NEGATIVE_REGULATION_OF_TRANSCRIPTION_FROM_RNA_POLYMERASE_II_PROMOTER	GO_BP_MM_NEGATIVE_REGULATION_OF_TRANSCRIPTION_FROM_RNA_POLYMERASE_II_PROMOTER	10/318	492/17799	0.384278	0.497591	0.388162	SHH/GATA2/BMP4/ZFPM2/WNT7B/ENG/TBX20/SNAI1/HIC1/TCF21	10
GO_BP_MM_CARBOHYDRATE_METABOLIC_PROCESS	GO_BP_MM_CARBOHYDRATE_METABOLIC_PROCESS	4/318	176/17799	0.38552	0.497591	0.388162	UGT2B35/UGT2B5/HHIP/UGT2B36	4
GO_BP_MM_CELL_AGING	GO_BP_MM_CELL_AGING	1/318	27/17799	0.385599	0.497591	0.388162	TBX3	1
GO_BP_MM_EPITHELIAL_TO_MESENCHYMAL_TRANSITION	GO_BP_MM_EPITHELIAL_TO_MESENCHYMAL_TRANSITION	1/318	27/17799	0.385599	0.497591	0.388162	SNAI1	1
GO_BP_MM_LIPOPOLYSACCHARIDE-MEDIATED_SIGNALING_PATHWAY	GO_BP_MM_LIPOPOLYSACCHARIDE-MEDIATED_SIGNALING_PATHWAY	1/318	27/17799	0.385599	0.497591	0.388162	CCL2	1
GO_BP_MM_NEGATIVE_REGULATION_OF_INSULIN_SECRETION	GO_BP_MM_NEGATIVE_REGULATION_OF_INSULIN_SECRETION	1/318	27/17799	0.385599	0.497591	0.388162	ABCC8	1
GO_BP_MM_PLATELET_ACTIVATION	GO_BP_MM_PLATELET_ACTIVATION	1/318	27/17799	0.385599	0.497591	0.388162	AXL	1
GO_BP_MM_RESPONSE_TO_STARVATION	GO_BP_MM_RESPONSE_TO_STARVATION	1/318	27/17799	0.385599	0.497591	0.388162	ADM	1
GO_BP_MM_SYNAPSE_ASSEMBLY	GO_BP_MM_SYNAPSE_ASSEMBLY	1/318	27/17799	0.385599	0.497591	0.388162	ACHE	1
GO_BP_MM_TRIGLYCERIDE_METABOLIC_PROCESS	GO_BP_MM_TRIGLYCERIDE_METABOLIC_PROCESS	1/318	27/17799	0.385599	0.497591	0.388162	CYP2E1	1
GO_CC_MM_INTRINSIC_TO_ENDOPLASMIC_RETICULUM_MEMBRANE	GO_CC_MM_INTRINSIC_TO_ENDOPLASMIC_RETICULUM_MEMBRANE	1/318	27/17799	0.385599	0.497591	0.388162	CYP2E1	1
GO_CC_MM_ROUGH_ENDOPLASMIC_RETICULUM	GO_CC_MM_ROUGH_ENDOPLASMIC_RETICULUM	1/318	27/17799	0.385599	0.497591	0.388162	ADCYAP1R1	1
GO_MF_MM_EUKARYOTIC_CELL_SURFACE_BINDING	GO_MF_MM_EUKARYOTIC_CELL_SURFACE_BINDING	1/318	27/17799	0.385599	0.497591	0.388162	CFH	1
GO_MF_MM_PEPTIDE_HORMONE_BINDING	GO_MF_MM_PEPTIDE_HORMONE_BINDING	1/318	27/17799	0.385599	0.497591	0.388162	NPR3	1
GO_MF_MM_STRUCTURAL_CONSTITUENT_OF_CYTOSKELETON	GO_MF_MM_STRUCTURAL_CONSTITUENT_OF_CYTOSKELETON	1/318	27/17799	0.385599	0.497591	0.388162	DES	1
GO_BP_MM_NEURON_PROJECTION_DEVELOPMENT	GO_BP_MM_NEURON_PROJECTION_DEVELOPMENT	2/318	75/17799	0.388581	0.500258	0.390243	IL6/RASGRF1	2
GO_CC_MM_MITOCHONDRIAL_MEMBRANE	GO_CC_MM_MITOCHONDRIAL_MEMBRANE	2/318	75/17799	0.388581	0.500258	0.390243	ANXA1/FNDC1	2
GO_CC_MM_DENDRITIC_SPINE	GO_CC_MM_DENDRITIC_SPINE	2/318	76/17799	0.394903	0.503456	0.392738	SLC1A2/MYLK2	2
GO_BP_MM_CELLULAR_AMINO_ACID_METABOLIC_PROCESS	GO_BP_MM_CELLULAR_AMINO_ACID_METABOLIC_PROCESS	1/318	28/17799	0.396592	0.503456	0.392738	DDC	1
GO_BP_MM_GOLGI_ORGANIZATION	GO_BP_MM_GOLGI_ORGANIZATION	1/318	28/17799	0.396592	0.503456	0.392738	BHLHA15	1
GO_BP_MM_PEPTIDYL-THREONINE_PHOSPHORYLATION	GO_BP_MM_PEPTIDYL-THREONINE_PHOSPHORYLATION	1/318	28/17799	0.396592	0.503456	0.392738	MYLK2	1
GO_BP_MM_PHOSPHATIDYLINOSITOL_PHOSPHORYLATION	GO_BP_MM_PHOSPHATIDYLINOSITOL_PHOSPHORYLATION	1/318	28/17799	0.396592	0.503456	0.392738	PIK3CG	1
GO_BP_MM_POSITIVE_REGULATION_OF_PHAGOCYTOSIS	GO_BP_MM_POSITIVE_REGULATION_OF_PHAGOCYTOSIS	1/318	28/17799	0.396592	0.503456	0.392738	GATA2	1
GO_BP_MM_RESPONSE_TO_PROGESTERONE_STIMULUS	GO_BP_MM_RESPONSE_TO_PROGESTERONE_STIMULUS	1/318	28/17799	0.396592	0.503456	0.392738	CCL2	1
GO_BP_MM_RESPONSE_TO_RADIATION	GO_BP_MM_RESPONSE_TO_RADIATION	1/318	28/17799	0.396592	0.503456	0.392738	COL3A1	1
GO_CC_MM_LATERAL_PLASMA_MEMBRANE	GO_CC_MM_LATERAL_PLASMA_MEMBRANE	1/318	28/17799	0.396592	0.503456	0.392738	CLDN1	1
GO_CC_MM_RECYCLING_ENDOSOME_MEMBRANE	GO_CC_MM_RECYCLING_ENDOSOME_MEMBRANE	1/318	28/17799	0.396592	0.503456	0.392738	CLIP3	1
GO_MF_MM_AROMATASE_ACTIVITY	GO_MF_MM_AROMATASE_ACTIVITY	1/318	28/17799	0.396592	0.503456	0.392738	CYP1A1	1
GO_MF_MM_SMALL_MOLECULE_BINDING	GO_MF_MM_SMALL_MOLECULE_BINDING	1/318	28/17799	0.396592	0.503456	0.392738	APOD	1
GO_BP_MM_ACUTE-PHASE_RESPONSE	GO_BP_MM_ACUTE-PHASE_RESPONSE	1/318	29/17799	0.40739	0.512402	0.399716	IL6	1
GO_BP_MM_CELLULAR_RESPONSE_TO_TRANSFORMING_GROWTH_FACTOR_BETA_STIMULUS	GO_BP_MM_CELLULAR_RESPONSE_TO_TRANSFORMING_GROWTH_FACTOR_BETA_STIMULUS	1/318	29/17799	0.40739	0.512402	0.399716	CLEC3B	1
GO_BP_MM_POSITIVE_REGULATION_OF_ACTIN_FILAMENT_POLYMERIZATION	GO_BP_MM_POSITIVE_REGULATION_OF_ACTIN_FILAMENT_POLYMERIZATION	1/318	29/17799	0.40739	0.512402	0.399716	CCL11	1
GO_BP_MM_PROTEIN_POLYMERIZATION	GO_BP_MM_PROTEIN_POLYMERIZATION	1/318	29/17799	0.40739	0.512402	0.399716	TUBB4A	1
GO_BP_MM_RESPONSE_TO_ZINC_ION	GO_BP_MM_RESPONSE_TO_ZINC_ION	1/318	29/17799	0.40739	0.512402	0.399716	ABCC8	1
GO_CC_MM_BASAL_PLASMA_MEMBRANE	GO_CC_MM_BASAL_PLASMA_MEMBRANE	1/318	29/17799	0.40739	0.512402	0.399716	CD34	1
GO_CC_MM_BRUSH_BORDER	GO_CC_MM_BRUSH_BORDER	1/318	29/17799	0.40739	0.512402	0.399716	ATP6V0A4	1
GO_MF_MM_HYDROGEN_ION_TRANSMEMBRANE_TRANSPORTER_ACTIVITY	GO_MF_MM_HYDROGEN_ION_TRANSMEMBRANE_TRANSPORTER_ACTIVITY	1/318	29/17799	0.40739	0.512402	0.399716	ATP6V0A4	1
GO_BP_MM_CELL_SURFACE_RECEPTOR_SIGNALING_PATHWAY	GO_BP_MM_CELL_SURFACE_RECEPTOR_SIGNALING_PATHWAY	3/318	130/17799	0.411009	0.51636	0.402804	ANXA1/TNFRSF1B/ADCYAP1R1	3
GO_MF_MM_OXIDOREDUCTASE_ACTIVITY	GO_MF_MM_OXIDOREDUCTASE_ACTIVITY	7/318	342/17799	0.411694	0.516626	0.403012	HSD11B1/GSTO1/CYP2E1/CYP1A1/FA2H/EGLN3/DMGDH	7
GO_BP_MM_CANONICAL_WNT_RECEPTOR_SIGNALING_PATHWAY	GO_BP_MM_CANONICAL_WNT_RECEPTOR_SIGNALING_PATHWAY	2/318	79/17799	0.413684	0.517935	0.404032	SHH/WNT7B	2
GO_BP_MM_FOREBRAIN_DEVELOPMENT	GO_BP_MM_FOREBRAIN_DEVELOPMENT	2/318	79/17799	0.413684	0.517935	0.404032	SHH/BMP4	2
GO_BP_MM_LIPID_METABOLIC_PROCESS	GO_BP_MM_LIPID_METABOLIC_PROCESS	3/318	131/17799	0.415787	0.519971	0.405621	LPL/APOD/SULT1D1	3
GO_BP_MM_EPHRIN_RECEPTOR_SIGNALING_PATHWAY	GO_BP_MM_EPHRIN_RECEPTOR_SIGNALING_PATHWAY	1/318	30/17799	0.417995	0.520945	0.40638	EPHA3	1
GO_BP_MM_T_CELL_RECEPTOR_SIGNALING_PATHWAY	GO_BP_MM_T_CELL_RECEPTOR_SIGNALING_PATHWAY	1/318	30/17799	0.417995	0.520945	0.40638	THY1	1
GO_MF_MM_OXIDOREDUCTASE_ACTIVITY_DONOR_AND_INCORPORATION_OF_ONE_ATOM_EACH_OF_OXYGEN_INTO_BOTH_DONORS	GO_MF_MM_OXIDOREDUCTASE_ACTIVITY_DONOR_AND_INCORPORATION_OF_ONE_ATOM_EACH_OF_OXYGEN_INTO_BOTH_DONORS	1/318	30/17799	0.417995	0.520945	0.40638	EGLN3	1
GO_MF_MM_PROTEIN_DOMAIN_SPECIFIC_BINDING	GO_MF_MM_PROTEIN_DOMAIN_SPECIFIC_BINDING	4/318	186/17799	0.425756	0.530013	0.413455	POU2F2/DDC/CLEC3B/WHRN	4
GO_BP_MM_PROTEIN_KINASE_C-ACTIVATING_G-PROTEIN_COUPLED_RECEPTOR_SIGNALING_PATHWAY	GO_BP_MM_PROTEIN_KINASE_C-ACTIVATING_G-PROTEIN_COUPLED_RECEPTOR_SIGNALING_PATHWAY	1/318	31/17799	0.428411	0.532711	0.415559	EDNRA	1
GO_BP_MM_POST-EMBRYONIC_DEVELOPMENT	GO_BP_MM_POST-EMBRYONIC_DEVELOPMENT	2/318	83/17799	0.438266	0.537482	0.419281	BMP4/NDN	2
GO_BP_MM_CALCIUM-MEDIATED_SIGNALING	GO_BP_MM_CALCIUM-MEDIATED_SIGNALING	1/318	32/17799	0.438641	0.537482	0.419281	BHLHA15	1
GO_BP_MM_LEARNING_OR_MEMORY	GO_BP_MM_LEARNING_OR_MEMORY	1/318	32/17799	0.438641	0.537482	0.419281	PRKCG	1
GO_BP_MM_MAMMARY_GLAND_DEVELOPMENT	GO_BP_MM_MAMMARY_GLAND_DEVELOPMENT	1/318	32/17799	0.438641	0.537482	0.419281	TBX3	1
GO_BP_MM_NEGATIVE_REGULATION_OF_CELL_DIFFERENTIATION	GO_BP_MM_NEGATIVE_REGULATION_OF_CELL_DIFFERENTIATION	1/318	32/17799	0.438641	0.537482	0.419281	SHH	1
GO_BP_MM_NEGATIVE_REGULATION_OF_MAP_KINASE_ACTIVITY	GO_BP_MM_NEGATIVE_REGULATION_OF_MAP_KINASE_ACTIVITY	1/318	32/17799	0.438641	0.537482	0.419281	BMP4	1
GO_BP_MM_POSITIVE_REGULATION_OF_B_CELL_PROLIFERATION	GO_BP_MM_POSITIVE_REGULATION_OF_B_CELL_PROLIFERATION	1/318	32/17799	0.438641	0.537482	0.419281	ADA	1
GO_BP_MM_POSITIVE_REGULATION_OF_PROTEASOMAL_UBIQUITIN-DEPENDENT_PROTEIN_CATABOLIC_PROCESS	GO_BP_MM_POSITIVE_REGULATION_OF_PROTEASOMAL_UBIQUITIN-DEPENDENT_PROTEIN_CATABOLIC_PROCESS	1/318	32/17799	0.438641	0.537482	0.419281	TRIB2	1
GO_BP_MM_RAS_PROTEIN_SIGNAL_TRANSDUCTION	GO_BP_MM_RAS_PROTEIN_SIGNAL_TRANSDUCTION	1/318	32/17799	0.438641	0.537482	0.419281	RASGRP3	1
GO_BP_MM_REGULATION_OF_PROTEIN_LOCALIZATION	GO_BP_MM_REGULATION_OF_PROTEIN_LOCALIZATION	1/318	32/17799	0.438641	0.537482	0.419281	SHH	1
GO_BP_MM_RESPONSE_TO_ACTIVITY	GO_BP_MM_RESPONSE_TO_ACTIVITY	1/318	32/17799	0.438641	0.537482	0.419281	CCL2	1
GO_BP_MM_T_CELL_DIFFERENTIATION_IN_THYMUS	GO_BP_MM_T_CELL_DIFFERENTIATION_IN_THYMUS	1/318	32/17799	0.438641	0.537482	0.419281	SHH	1
GO_CC_MM_SARCOPLASMIC_RETICULUM	GO_CC_MM_SARCOPLASMIC_RETICULUM	1/318	32/17799	0.438641	0.537482	0.419281	ATP2A3	1
GO_MF_MM_UBIQUITIN_PROTEIN_LIGASE_BINDING	GO_MF_MM_UBIQUITIN_PROTEIN_LIGASE_BINDING	3/318	136/17799	0.439477	0.537904	0.41961	TRIB2/NKD2/TNFRSF1B	3
GO_BP_MM_RESPONSE_TO_STRESS	GO_BP_MM_RESPONSE_TO_STRESS	3/318	137/17799	0.444172	0.543042	0.423619	AVIL/ADM/CYP1A1	3
GO_BP_MM_BEHAVIOR	GO_BP_MM_BEHAVIOR	1/318	33/17799	0.448688	0.544907	0.425073	PENK	1
GO_BP_MM_CILIUM_MORPHOGENESIS	GO_BP_MM_CILIUM_MORPHOGENESIS	1/318	33/17799	0.448688	0.544907	0.425073	AVIL	1
GO_BP_MM_ERYTHROCYTE_DIFFERENTIATION	GO_BP_MM_ERYTHROCYTE_DIFFERENTIATION	1/318	33/17799	0.448688	0.544907	0.425073	BMP4	1
GO_BP_MM_POSITIVE_REGULATION_OF_TRANSLATION	GO_BP_MM_POSITIVE_REGULATION_OF_TRANSLATION	1/318	33/17799	0.448688	0.544907	0.425073	IL6	1
GO_MF_MM_SEQUENCE-SPECIFIC_DNA_BINDING_RNA_POLYMERASE_II_TRANSCRIPTION_FACTOR_ACTIVITY	GO_MF_MM_SEQUENCE-SPECIFIC_DNA_BINDING_RNA_POLYMERASE_II_TRANSCRIPTION_FACTOR_ACTIVITY	1/318	33/17799	0.448688	0.544907	0.425073	DKK2	1
GO_MF_MM_SH2_DOMAIN_BINDING	GO_MF_MM_SH2_DOMAIN_BINDING	1/318	33/17799	0.448688	0.544907	0.425073	LAX1	1
GO_CC_MM_MELANOSOME	GO_CC_MM_MELANOSOME	2/318	85/17799	0.450345	0.546312	0.426169	SERPINF1/GPNMB	2
GO_MF_MM_CYSTEINE-TYPE_PEPTIDASE_ACTIVITY	GO_MF_MM_CYSTEINE-TYPE_PEPTIDASE_ACTIVITY	2/318	86/17799	0.45633	0.550771	0.429648	USP43/CTSK	2
GO_BP_MM_ACTIN_CYTOSKELETON_REORGANIZATION	GO_BP_MM_ACTIN_CYTOSKELETON_REORGANIZATION	1/318	34/17799	0.458556	0.550771	0.429648	INSRR	1
GO_BP_MM_ATP_HYDROLYSIS_COUPLED_PROTON_TRANSPORT	GO_BP_MM_ATP_HYDROLYSIS_COUPLED_PROTON_TRANSPORT	1/318	34/17799	0.458556	0.550771	0.429648	ATP6V0A4	1
GO_BP_MM_GERM_CELL_DEVELOPMENT	GO_BP_MM_GERM_CELL_DEVELOPMENT	1/318	34/17799	0.458556	0.550771	0.429648	BMP4	1
GO_BP_MM_POSITIVE_REGULATION_OF_MESENCHYMAL_CELL_PROLIFERATION	GO_BP_MM_POSITIVE_REGULATION_OF_MESENCHYMAL_CELL_PROLIFERATION	1/318	34/17799	0.458556	0.550771	0.429648	SHH	1
GO_BP_MM_REGULATION_OF_MULTICELLULAR_ORGANISM_GROWTH	GO_BP_MM_REGULATION_OF_MULTICELLULAR_ORGANISM_GROWTH	1/318	34/17799	0.458556	0.550771	0.429648	NPY1R	1
GO_BP_MM_SOMATIC_STEM_CELL_MAINTENANCE	GO_BP_MM_SOMATIC_STEM_CELL_MAINTENANCE	1/318	34/17799	0.458556	0.550771	0.429648	GATA2	1
GO_BP_MM_THYMUS_DEVELOPMENT	GO_BP_MM_THYMUS_DEVELOPMENT	1/318	34/17799	0.458556	0.550771	0.429648	SHH	1
GO_MF_MM_PROTEIN_SELF-ASSOCIATION	GO_MF_MM_PROTEIN_SELF-ASSOCIATION	1/318	34/17799	0.458556	0.550771	0.429648	ACHE	1
GO_MF_MM_TRANSCRIPTION_FACTOR_BINDING	GO_MF_MM_TRANSCRIPTION_FACTOR_BINDING	5/318	251/17799	0.466399	0.559339	0.436331	GATA2/CD34/TRIB2/ZFPM2/RUNX1	5
GO_CC_MM_GOLGI_MEMBRANE	GO_CC_MM_GOLGI_MEMBRANE	6/318	306/17799	0.466822	0.559339	0.436331	SRGN/CYP2E1/MALL/NTRK1/ADCYAP1R1/B3GNT3	6
GO_BP_MM_PATTERN_SPECIFICATION_PROCESS	GO_BP_MM_PATTERN_SPECIFICATION_PROCESS	2/318	88/17799	0.468186	0.559339	0.436331	SHH/BMP5	2
GO_BP_MM_ACTIN_FILAMENT_ORGANIZATION	GO_BP_MM_ACTIN_FILAMENT_ORGANIZATION	1/318	35/17799	0.468248	0.559339	0.436331	CCL11	1
GO_BP_MM_PANCREAS_DEVELOPMENT	GO_BP_MM_PANCREAS_DEVELOPMENT	1/318	35/17799	0.468248	0.559339	0.436331	SHH	1
GO_BP_MM_AXONOGENESIS	GO_BP_MM_AXONOGENESIS	2/318	89/17799	0.474056	0.565041	0.44078	WNT7B/NDN	2
GO_CC_MM_NUCLEAR_ENVELOPE	GO_CC_MM_NUCLEAR_ENVELOPE	2/318	89/17799	0.474056	0.565041	0.44078	ALOX5/RAC2	2
GO_BP_MM_B_CELL_DIFFERENTIATION	GO_BP_MM_B_CELL_DIFFERENTIATION	1/318	36/17799	0.477767	0.565763	0.441343	NTRK1	1
GO_BP_MM_NEGATIVE_REGULATION_OF_PROTEIN_PHOSPHORYLATION	GO_BP_MM_NEGATIVE_REGULATION_OF_PROTEIN_PHOSPHORYLATION	1/318	36/17799	0.477767	0.565763	0.441343	IGFBP3	1
GO_BP_MM_NEGATIVE_REGULATION_OF_TRANSFORMING_GROWTH_FACTOR_BETA_RECEPTOR_SIGNALING_PATHWAY	GO_BP_MM_NEGATIVE_REGULATION_OF_TRANSFORMING_GROWTH_FACTOR_BETA_RECEPTOR_SIGNALING_PATHWAY	1/318	36/17799	0.477767	0.565763	0.441343	ASPN	1
GO_BP_MM_PHOSPHORYLATION	GO_BP_MM_PHOSPHORYLATION	1/318	36/17799	0.477767	0.565763	0.441343	PRKCG	1
GO_CC_MM_MHC_CLASS_I_PROTEIN_COMPLEX	GO_CC_MM_MHC_CLASS_I_PROTEIN_COMPLEX	1/318	36/17799	0.477767	0.565763	0.441343	H2-Q10	1
GO_MF_MM_NUCLEOTIDYLTRANSFERASE_ACTIVITY	GO_MF_MM_NUCLEOTIDYLTRANSFERASE_ACTIVITY	1/318	36/17799	0.477767	0.565763	0.441343	PAPSS2	1
GO_MF_MM_PROTEIN_C-TERMINUS_BINDING	GO_MF_MM_PROTEIN_C-TERMINUS_BINDING	3/318	145/17799	0.481141	0.569142	0.443978	FBLN5/SDCBP2/ECM1	3
GO_MF_MM_GTPASE_ACTIVITY	GO_MF_MM_GTPASE_ACTIVITY	5/318	256/17799	0.48357	0.571397	0.445738	GNG4/RERG/RAC2/ABCA8A/TUBB4A	5
GO_CC_MM_SYNAPSE	GO_CC_MM_SYNAPSE	3/318	146/17799	0.485682	0.573109	0.447073	SLC1A2/ACHE/WHRN	3
GO_BP_MM_LEARNING	GO_BP_MM_LEARNING	1/318	37/17799	0.487116	0.573109	0.447073	STRA6	1
GO_BP_MM_NEUROGENESIS	GO_BP_MM_NEUROGENESIS	1/318	37/17799	0.487116	0.573109	0.447073	PRDM6	1
GO_CC_MM_CLATHRIN-COATED_VESICLE	GO_CC_MM_CLATHRIN-COATED_VESICLE	1/318	37/17799	0.487116	0.573109	0.447073	MALL	1
GO_MF_MM_SIGNAL_TRANSDUCER_ACTIVITY	GO_MF_MM_SIGNAL_TRANSDUCER_ACTIVITY	4/318	202/17799	0.488574	0.574206	0.447929	SHH/LSP1/GNG4/ECM1	4
GO_MF_MM_TRANSPORTER_ACTIVITY	GO_MF_MM_TRANSPORTER_ACTIVITY	4/318	204/17799	0.496239	0.581147	0.453344	APOD/RBP7/SLCO2B1/SYT8	4
GO_BP_MM_CELLULAR_RESPONSE_TO_ORGANIC_CYCLIC_COMPOUND	GO_BP_MM_CELLULAR_RESPONSE_TO_ORGANIC_CYCLIC_COMPOUND	1/318	38/17799	0.496299	0.581147	0.453344	CCL2	1
GO_CC_MM_HETEROTRIMERIC_G-PROTEIN_COMPLEX	GO_CC_MM_HETEROTRIMERIC_G-PROTEIN_COMPLEX	1/318	38/17799	0.496299	0.581147	0.453344	GNG4	1
GO_BP_MM_VISUAL_PERCEPTION	GO_BP_MM_VISUAL_PERCEPTION	2/318	93/17799	0.497139	0.581147	0.453344	COL1A1/NYX	2
GO_MF_MM_GUANYL-NUCLEOTIDE_EXCHANGE_FACTOR_ACTIVITY	GO_MF_MM_GUANYL-NUCLEOTIDE_EXCHANGE_FACTOR_ACTIVITY	2/318	93/17799	0.497139	0.581147	0.453344	RASGRF1/RASGRP3	2
GO_MF_MM_IDENTICAL_PROTEIN_BINDING	GO_MF_MM_IDENTICAL_PROTEIN_BINDING	6/318	316/17799	0.497818	0.58132	0.453478	COL1A1/LCP1/CLDN1/CDA/EMILIN1/COL1A2	6
GO_BP_MM_GTP_CATABOLIC_PROCESS	GO_BP_MM_GTP_CATABOLIC_PROCESS	4/318	205/17799	0.500054	0.582685	0.454543	GNG4/RERG/RAC2/TUBB4A	4
GO_BP_MM_ION_TRANSPORT	GO_BP_MM_ION_TRANSPORT	4/318	205/17799	0.500054	0.582685	0.454543	SLCO2B1/KCNS3/KCNE4/FXYD6	4
GO_BP_MM_CELLULAR_RESPONSE_TO_TUMOR_NECROSIS_FACTOR	GO_BP_MM_CELLULAR_RESPONSE_TO_TUMOR_NECROSIS_FACTOR	1/318	39/17799	0.505317	0.585076	0.456408	CCL2	1
GO_BP_MM_EPITHELIAL_CELL_DIFFERENTIATION	GO_BP_MM_EPITHELIAL_CELL_DIFFERENTIATION	1/318	39/17799	0.505317	0.585076	0.456408	TCF21	1
GO_BP_MM_RESPONSE_TO_STIMULUS	GO_BP_MM_RESPONSE_TO_STIMULUS	1/318	39/17799	0.505317	0.585076	0.456408	NYX	1
GO_CC_MM_RECYCLING_ENDOSOME	GO_CC_MM_RECYCLING_ENDOSOME	1/318	39/17799	0.505317	0.585076	0.456408	ABCG1	1
GO_CC_MM_TERMINAL_BUTTON	GO_CC_MM_TERMINAL_BUTTON	1/318	39/17799	0.505317	0.585076	0.456408	MYLK2	1
GO_MF_MM_ATPASE_ACTIVITY_COUPLED_TO_TRANSMEMBRANE_MOVEMENT_OF_SUBSTANCES	GO_MF_MM_ATPASE_ACTIVITY_COUPLED_TO_TRANSMEMBRANE_MOVEMENT_OF_SUBSTANCES	1/318	39/17799	0.505317	0.585076	0.456408	ABCC8	1
GO_BP_MM_DETERMINATION_OF_LEFT_RIGHT_SYMMETRY	GO_BP_MM_DETERMINATION_OF_LEFT_RIGHT_SYMMETRY	1/318	40/17799	0.514175	0.59282	0.462449	SHH	1
GO_BP_MM_NEUROTRANSMITTER_TRANSPORT	GO_BP_MM_NEUROTRANSMITTER_TRANSPORT	1/318	40/17799	0.514175	0.59282	0.462449	SLC6A14	1
GO_BP_MM_PEPTIDYL-TYROSINE_DEPHOSPHORYLATION	GO_BP_MM_PEPTIDYL-TYROSINE_DEPHOSPHORYLATION	1/318	40/17799	0.514175	0.59282	0.462449	PTPRT	1
GO_MF_MM_GLYCOPROTEIN_BINDING	GO_MF_MM_GLYCOPROTEIN_BINDING	1/318	40/17799	0.514175	0.59282	0.462449	SHH	1
GO_BP_MM_LACTATION	GO_BP_MM_LACTATION	1/318	41/17799	0.522874	0.60158	0.469283	NEURL1A	1
GO_BP_MM_POSITIVE_REGULATION_OF_T_CELL_PROLIFERATION	GO_BP_MM_POSITIVE_REGULATION_OF_T_CELL_PROLIFERATION	1/318	41/17799	0.522874	0.60158	0.469283	IL6	1
GO_BP_MM_CALCIUM_ION_TRANSPORT	GO_BP_MM_CALCIUM_ION_TRANSPORT	2/318	98/17799	0.52507	0.603471	0.470758	ATP2A3/ATP2C2	2
GO_CC_MM_RUFFLE_MEMBRANE	GO_CC_MM_RUFFLE_MEMBRANE	1/318	43/17799	0.53981	0.619761	0.483465	LCP1	1
GO_MF_MM_LIPID_BINDING	GO_MF_MM_LIPID_BINDING	2/318	102/17799	0.546651	0.625936	0.488282	PLTP/PTGS2	2
GO_BP_MM_MUSCLE_ORGAN_DEVELOPMENT	GO_BP_MM_MUSCLE_ORGAN_DEVELOPMENT	1/318	44/17799	0.548052	0.625936	0.488282	DES	1
GO_BP_MM_NEGATIVE_REGULATION_OF_EPITHELIAL_CELL_PROLIFERATION	GO_BP_MM_NEGATIVE_REGULATION_OF_EPITHELIAL_CELL_PROLIFERATION	1/318	44/17799	0.548052	0.625936	0.488282	BMP4	1
GO_MF_MM_G-PROTEIN_COUPLED_RECEPTOR_BINDING	GO_MF_MM_G-PROTEIN_COUPLED_RECEPTOR_BINDING	1/318	44/17799	0.548052	0.625936	0.488282	CCL2	1
GO_MF_MM_SCAVENGER_RECEPTOR_ACTIVITY	GO_MF_MM_SCAVENGER_RECEPTOR_ACTIVITY	1/318	44/17799	0.548052	0.625936	0.488282	TMPRSS4	1
GO_MF_MM_ION_CHANNEL_ACTIVITY	GO_MF_MM_ION_CHANNEL_ACTIVITY	3/318	161/17799	0.551329	0.629021	0.490689	KCNS3/KCTD14/FXYD6	3
GO_BP_MM_NEGATIVE_REGULATION_OF_NF-KAPPAB_TRANSCRIPTION_FACTOR_ACTIVITY	GO_BP_MM_NEGATIVE_REGULATION_OF_NF-KAPPAB_TRANSCRIPTION_FACTOR_ACTIVITY	1/318	45/17799	0.556146	0.632537	0.493432	PTGIS	1
GO_BP_MM_POSITIVE_REGULATION_OF_PROTEIN_KINASE_ACTIVITY	GO_BP_MM_POSITIVE_REGULATION_OF_PROTEIN_KINASE_ACTIVITY	1/318	45/17799	0.556146	0.632537	0.493432	DDR2	1
GO_CC_MM_STRESS_FIBER	GO_CC_MM_STRESS_FIBER	1/318	45/17799	0.556146	0.632537	0.493432	MST1R	1
GO_MF_MM_TRANSCRIPTION_COREPRESSOR_ACTIVITY	GO_MF_MM_TRANSCRIPTION_COREPRESSOR_ACTIVITY	2/318	105/17799	0.562383	0.638258	0.497895	AEBP1/ZFPM2	2
GO_BP_MM_BMP_SIGNALING_PATHWAY	GO_BP_MM_BMP_SIGNALING_PATHWAY	1/318	46/17799	0.564096	0.638258	0.497895	BMP4	1
GO_BP_MM_OVARIAN_FOLLICLE_DEVELOPMENT	GO_BP_MM_OVARIAN_FOLLICLE_DEVELOPMENT	1/318	46/17799	0.564096	0.638258	0.497895	BMP4	1
GO_BP_MM_POSITIVE_REGULATION_OF_JNK_CASCADE	GO_BP_MM_POSITIVE_REGULATION_OF_JNK_CASCADE	1/318	46/17799	0.564096	0.638258	0.497895	WNT7B	1
GO_MF_MM_CALCIUM_CHANNEL_ACTIVITY	GO_MF_MM_CALCIUM_CHANNEL_ACTIVITY	1/318	46/17799	0.564096	0.638258	0.497895	CACNA2D4	1
GO_BP_MM_CELLULAR_METABOLIC_PROCESS	GO_BP_MM_CELLULAR_METABOLIC_PROCESS	1/318	47/17799	0.571904	0.645089	0.503224	WNT7B	1
GO_BP_MM_CIRCADIAN_RHYTHM	GO_BP_MM_CIRCADIAN_RHYTHM	1/318	47/17799	0.571904	0.645089	0.503224	DDC	1
GO_CC_MM_SYNAPTIC_VESICLE_MEMBRANE	GO_CC_MM_SYNAPTIC_VESICLE_MEMBRANE	1/318	47/17799	0.571904	0.645089	0.503224	ABCC8	1
GO_BP_MM_CHOLESTEROL_HOMEOSTASIS	GO_BP_MM_CHOLESTEROL_HOMEOSTASIS	1/318	48/17799	0.579573	0.652393	0.508921	ABCG1	1
GO_MF_MM_SINGLE-STRANDED_DNA_BINDING	GO_MF_MM_SINGLE-STRANDED_DNA_BINDING	1/318	48/17799	0.579573	0.652393	0.508921	ANXA1	1
GO_BP_MM_DEFENSE_RESPONSE	GO_BP_MM_DEFENSE_RESPONSE	2/318	109/17799	0.582746	0.65529	0.511181	RARRES2/LSP1	2
GO_MF_MM_PROTEIN_HETERODIMERIZATION_ACTIVITY	GO_MF_MM_PROTEIN_HETERODIMERIZATION_ACTIVITY	5/318	287/17799	0.584896	0.657031	0.512539	AXL/RUNX1/ABCG1/SDCBP2/HGF	5
GO_BP_MM_REGULATION_OF_CELL_MIGRATION	GO_BP_MM_REGULATION_OF_CELL_MIGRATION	1/318	49/17799	0.587105	0.657485	0.512894	LAMA2	1
GO_BP_MM_SOMITOGENESIS	GO_BP_MM_SOMITOGENESIS	1/318	49/17799	0.587105	0.657485	0.512894	IFITM1	1
GO_MF_MM_PEPTIDE_BINDING	GO_MF_MM_PEPTIDE_BINDING	1/318	49/17799	0.587105	0.657485	0.512894	ACE	1
GO_BP_MM_FATTY_ACID_BIOSYNTHETIC_PROCESS	GO_BP_MM_FATTY_ACID_BIOSYNTHETIC_PROCESS	1/318	50/17799	0.594502	0.663729	0.517764	FA2H	1
GO_CC_MM_INSOLUBLE_FRACTION	GO_CC_MM_INSOLUBLE_FRACTION	1/318	50/17799	0.594502	0.663729	0.517764	DES	1
GO_CC_MM_MYOSIN_COMPLEX	GO_CC_MM_MYOSIN_COMPLEX	1/318	50/17799	0.594502	0.663729	0.517764	MYH7B	1
GO_BP_MM_ACTIN_CYTOSKELETON_ORGANIZATION	GO_BP_MM_ACTIN_CYTOSKELETON_ORGANIZATION	2/318	112/17799	0.597556	0.665778	0.519363	CORO2A/RAC2	2
GO_BP_MM_EMBRYO_DEVELOPMENT	GO_BP_MM_EMBRYO_DEVELOPMENT	2/318	112/17799	0.597556	0.665778	0.519363	SHH/THBD	2
GO_MF_MM_TRANSMEMBRANE_TRANSPORTER_ACTIVITY	GO_MF_MM_TRANSMEMBRANE_TRANSPORTER_ACTIVITY	1/318	51/17799	0.601767	0.669788	0.52249	SLC2A6	1
GO_BP_MM_EMBRYONIC_SKELETAL_SYSTEM_MORPHOGENESIS	GO_BP_MM_EMBRYONIC_SKELETAL_SYSTEM_MORPHOGENESIS	1/318	52/17799	0.608902	0.67498	0.526541	BMP4	1
GO_BP_MM_REGULATION_OF_GROWTH	GO_BP_MM_REGULATION_OF_GROWTH	1/318	52/17799	0.608902	0.67498	0.526541	IGFBP3	1
GO_BP_MM_SKELETAL_MUSCLE_TISSUE_DEVELOPMENT	GO_BP_MM_SKELETAL_MUSCLE_TISSUE_DEVELOPMENT	1/318	52/17799	0.608902	0.67498	0.526541	DCN	1
GO_MF_MM_SYMPORTER_ACTIVITY	GO_MF_MM_SYMPORTER_ACTIVITY	1/318	52/17799	0.608902	0.67498	0.526541	SLC16A3	1
GO_CC_MM_CELL_JUNCTION	GO_CC_MM_CELL_JUNCTION	5/318	297/17799	0.615231	0.679304	0.529914	ADA/LCP1/CLDN1/ACHE/PRKCG	5
GO_BP_MM_EXOCYTOSIS	GO_BP_MM_EXOCYTOSIS	1/318	53/17799	0.61591	0.679304	0.529914	NKD2	1
GO_BP_MM_LIPID_TRANSPORT	GO_BP_MM_LIPID_TRANSPORT	1/318	53/17799	0.61591	0.679304	0.529914	PLTP	1
GO_BP_MM_NEGATIVE_REGULATION_OF_SEQUENCE-SPECIFIC_DNA_BINDING_TRANSCRIPTION_FACTOR_ACTIVITY	GO_BP_MM_NEGATIVE_REGULATION_OF_SEQUENCE-SPECIFIC_DNA_BINDING_TRANSCRIPTION_FACTOR_ACTIVITY	1/318	53/17799	0.61591	0.679304	0.529914	TRIB2	1
GO_MF_MM_ENDOPEPTIDASE_ACTIVITY	GO_MF_MM_ENDOPEPTIDASE_ACTIVITY	1/318	53/17799	0.61591	0.679304	0.529914	NAPSA	1
GO_BP_MM_MULTICELLULAR_ORGANISM_GROWTH	GO_BP_MM_MULTICELLULAR_ORGANISM_GROWTH	1/318	54/17799	0.622793	0.686202	0.535295	SLC1A2	1
GO_CC_MM_SOLUBLE_FRACTION	GO_CC_MM_SOLUBLE_FRACTION	5/318	301/17799	0.626997	0.690139	0.538366	GPX3/DDC/ANXA1/ALOX5/WHRN	5
GO_BP_MM_STEROID_HORMONE_MEDIATED_SIGNALING_PATHWAY	GO_BP_MM_STEROID_HORMONE_MEDIATED_SIGNALING_PATHWAY	1/318	55/17799	0.629553	0.692255	0.540017	BMP4	1
GO_MF_MM_BETA-CATENIN_BINDING	GO_MF_MM_BETA-CATENIN_BINDING	1/318	56/17799	0.636192	0.698852	0.545163	PTPRT	1
GO_BP_MM_BRAIN_DEVELOPMENT	GO_BP_MM_BRAIN_DEVELOPMENT	3/318	184/17799	0.641717	0.704213	0.549345	BMP4/APOD/TSPAN2	3
GO_BP_MM_ANTIGEN_PROCESSING_AND_PRESENTATION	GO_BP_MM_ANTIGEN_PROCESSING_AND_PRESENTATION	1/318	58/17799	0.649116	0.710194	0.554011	H2-Q10	1
GO_BP_MM_MICROTUBULE_CYTOSKELETON_ORGANIZATION	GO_BP_MM_MICROTUBULE_CYTOSKELETON_ORGANIZATION	1/318	58/17799	0.649116	0.710194	0.554011	CCDC88B	1
GO_MF_MM_SULFOTRANSFERASE_ACTIVITY	GO_MF_MM_SULFOTRANSFERASE_ACTIVITY	1/318	58/17799	0.649116	0.710194	0.554011	SULT1D1	1
GO_BP_MM_RESPONSE_TO_VIRUS	GO_BP_MM_RESPONSE_TO_VIRUS	2/318	124/17799	0.652836	0.71355	0.556629	CYP1A1/MST1R	2
GO_BP_MM_CHOLESTEROL_METABOLIC_PROCESS	GO_BP_MM_CHOLESTEROL_METABOLIC_PROCESS	1/318	59/17799	0.655405	0.714928	0.557704	ABCG1	1
GO_MF_MM_PYRIDOXAL_PHOSPHATE_BINDING	GO_MF_MM_PYRIDOXAL_PHOSPHATE_BINDING	1/318	59/17799	0.655405	0.714928	0.557704	DDC	1
GO_MF_MM_CALMODULIN_BINDING	GO_MF_MM_CALMODULIN_BINDING	2/318	125/17799	0.657159	0.716127	0.558639	AEBP1/MYLK2	2
GO_BP_MM_REGULATION_OF_TRANSLATION	GO_BP_MM_REGULATION_OF_TRANSLATION	1/318	60/17799	0.661583	0.720229	0.561839	IGF2BP2	1
GO_BP_MM_ACTIVATION_OF_MAPK_ACTIVITY	GO_BP_MM_ACTIVATION_OF_MAPK_ACTIVITY	1/318	61/17799	0.667649	0.72611	0.566427	HGF	1
GO_BP_MM_FATTY_ACID_METABOLIC_PROCESS	GO_BP_MM_FATTY_ACID_METABOLIC_PROCESS	1/318	62/17799	0.673607	0.731135	0.570347	FA2H	1
GO_CC_MM_ACROSOMAL_VESICLE	GO_CC_MM_ACROSOMAL_VESICLE	1/318	62/17799	0.673607	0.731135	0.570347	SYT8	1
GO_BP_MM_TRANSMEMBRANE_TRANSPORT	GO_BP_MM_TRANSMEMBRANE_TRANSPORT	7/318	442/17799	0.678993	0.735296	0.573592	SLC16A3/SLC43A3/SLC30A2/SLCO2B1/SLC2A6/ABCC8/KCNS3	7
GO_BP_MM_CELL_REDOX_HOMEOSTASIS	GO_BP_MM_CELL_REDOX_HOMEOSTASIS	1/318	63/17799	0.679459	0.735296	0.573592	IL6	1
GO_MF_MM_UBIQUITIN_THIOLESTERASE_ACTIVITY	GO_MF_MM_UBIQUITIN_THIOLESTERASE_ACTIVITY	1/318	63/17799	0.679459	0.735296	0.573592	USP43	1
GO_BP_MM_SPERMATOGENESIS	GO_BP_MM_SPERMATOGENESIS	4/318	260/17799	0.685923	0.741557	0.578476	AXL/GLI1/ADCYAP1R1/NKD1	4
GO_MF_MM_DRUG_BINDING	GO_MF_MM_DRUG_BINDING	1/318	66/17799	0.696394	0.75065	0.58557	ACE	1
GO_MF_MM_LIGASE_ACTIVITY	GO_MF_MM_LIGASE_ACTIVITY	1/318	66/17799	0.696394	0.75065	0.58557	NEURL1A	1
GO_MF_MM_MOTOR_ACTIVITY	GO_MF_MM_MOTOR_ACTIVITY	1/318	66/17799	0.696394	0.75065	0.58557	MYH7B	1
GO_BP_MM_INTRACELLULAR_SIGNAL_TRANSDUCTION	GO_BP_MM_INTRACELLULAR_SIGNAL_TRANSDUCTION	4/318	264/17799	0.697352	0.750941	0.585797	ADCY7/LAX1/RASGRP3/PRKCG	4
GO_CC_MM_BASOLATERAL_PLASMA_MEMBRANE	GO_CC_MM_BASOLATERAL_PLASMA_MEMBRANE	2/318	135/17799	0.698052	0.750955	0.585808	CD44/ANXA1	2
GO_BP_MM_ACTIVATION_OF_CYSTEINE-TYPE_ENDOPEPTIDASE_ACTIVITY_INVOLVED_IN_APOPTOTIC_PROCESS	GO_BP_MM_ACTIVATION_OF_CYSTEINE-TYPE_ENDOPEPTIDASE_ACTIVITY_INVOLVED_IN_APOPTOTIC_PROCESS	1/318	67/17799	0.701839	0.753546	0.587829	EGLN3	1
GO_CC_MM_CYTOPLASMIC_VESICLE_MEMBRANE	GO_CC_MM_CYTOPLASMIC_VESICLE_MEMBRANE	1/318	67/17799	0.701839	0.753546	0.587829	GPNMB	1
GO_BP_MM_LIPID_CATABOLIC_PROCESS	GO_BP_MM_LIPID_CATABOLIC_PROCESS	1/318	68/17799	0.707186	0.758542	0.591726	LPL	1
GO_MF_MM_HEAT_SHOCK_PROTEIN_BINDING	GO_MF_MM_HEAT_SHOCK_PROTEIN_BINDING	1/318	69/17799	0.712438	0.763426	0.595536	DNAJA4	1
GO_BP_MM_CELL_MORPHOGENESIS	GO_BP_MM_CELL_MORPHOGENESIS	1/318	70/17799	0.717595	0.766697	0.598088	HGF	1
GO_CC_MM_RUFFLE	GO_CC_MM_RUFFLE	1/318	70/17799	0.717595	0.766697	0.598088	LCP1	1
GO_MF_MM_PHOSPHATIDYLINOSITOL_BINDING	GO_MF_MM_PHOSPHATIDYLINOSITOL_BINDING	1/318	70/17799	0.717595	0.766697	0.598088	NCF4	1
GO_BP_MM_REGULATION_OF_RHO_PROTEIN_SIGNAL_TRANSDUCTION	GO_BP_MM_REGULATION_OF_RHO_PROTEIN_SIGNAL_TRANSDUCTION	1/318	71/17799	0.722661	0.771355	0.601722	RASGRF1	1
GO_BP_MM_LOCOMOTORY_BEHAVIOR	GO_BP_MM_LOCOMOTORY_BEHAVIOR	1/318	72/17799	0.727635	0.775152	0.604683	NPY1R	1
GO_BP_MM_RESPONSE_TO_GLUCOSE_STIMULUS	GO_BP_MM_RESPONSE_TO_GLUCOSE_STIMULUS	1/318	72/17799	0.727635	0.775152	0.604683	COL6A2	1
GO_BP_MM_GLUCOSE_HOMEOSTASIS	GO_BP_MM_GLUCOSE_HOMEOSTASIS	1/318	73/17799	0.732521	0.778838	0.607559	BHLHA15	1
GO_MF_MM_RHO_GUANYL-NUCLEOTIDE_EXCHANGE_FACTOR_ACTIVITY	GO_MF_MM_RHO_GUANYL-NUCLEOTIDE_EXCHANGE_FACTOR_ACTIVITY	1/318	73/17799	0.732521	0.778838	0.607559	RASGRF1	1
GO_BP_MM_TRANSPORT	GO_BP_MM_TRANSPORT	7/318	470/17799	0.738577	0.784446	0.611934	ABCG1/SLCO2B1/STRA6/FA2H/ABCC8/ABCA9/ABCA8A	7
GO_BP_MM_REGULATION_OF_TRANSCRIPTION_FROM_RNA_POLYMERASE_II_PROMOTER	GO_BP_MM_REGULATION_OF_TRANSCRIPTION_FROM_RNA_POLYMERASE_II_PROMOTER	3/318	214/17799	0.739231	0.784446	0.611934	ECM1/ETS1/SNAI1	3
GO_BP_MM_POSITIVE_REGULATION_OF_NF-KAPPAB_TRANSCRIPTION_FACTOR_ACTIVITY	GO_BP_MM_POSITIVE_REGULATION_OF_NF-KAPPAB_TRANSCRIPTION_FACTOR_ACTIVITY	1/318	75/17799	0.742032	0.786655	0.613657	NTRK1	1
GO_CC_MM_CHROMATIN	GO_CC_MM_CHROMATIN	1/318	77/17799	0.751206	0.795609	0.620642	HIC1	1
GO_CC_MM_LATE_ENDOSOME	GO_CC_MM_LATE_ENDOSOME	1/318	79/17799	0.760055	0.804202	0.627345	SLC30A2	1
GO_BP_MM_SMALL_GTPASE_MEDIATED_SIGNAL_TRANSDUCTION	GO_BP_MM_SMALL_GTPASE_MEDIATED_SIGNAL_TRANSDUCTION	2/318	155/17799	0.767733	0.810878	0.632552	RERG/RAC2	2
GO_BP_MM_ELECTRON_TRANSPORT_CHAIN	GO_BP_MM_ELECTRON_TRANSPORT_CHAIN	1/318	81/17799	0.76859	0.810878	0.632552	FA2H	1
GO_MF_MM_PROTEIN_N-TERMINUS_BINDING	GO_MF_MM_PROTEIN_N-TERMINUS_BINDING	1/318	81/17799	0.76859	0.810878	0.632552	DCN	1
GO_CC_MM_ENDOPLASMIC_RETICULUM_MEMBRANE	GO_CC_MM_ENDOPLASMIC_RETICULUM_MEMBRANE	7/318	489/17799	0.774373	0.81619	0.636697	HSD11B1/PTGIS/DUOXA1/CYP1A1/PTGS2/FA2H/CYP2F2	7
GO_BP_MM_MICROTUBULE-BASED_MOVEMENT	GO_BP_MM_MICROTUBULE-BASED_MOVEMENT	1/318	83/17799	0.776823	0.817267	0.637536	TUBB4A	1
GO_BP_MM_INDUCTION_OF_APOPTOSIS	GO_BP_MM_INDUCTION_OF_APOPTOSIS	2/318	158/17799	0.776889	0.817267	0.637536	WNT7B/ETS1	2
GO_BP_MM_NEUROPEPTIDE_SIGNALING_PATHWAY	GO_BP_MM_NEUROPEPTIDE_SIGNALING_PATHWAY	1/318	84/17799	0.780829	0.819832	0.639538	PENK	1
GO_CC_MM_SECRETORY_GRANULE	GO_CC_MM_SECRETORY_GRANULE	1/318	84/17799	0.780829	0.819832	0.639538	LTF	1
GO_MF_MM_FLAVIN_ADENINE_DINUCLEOTIDE_BINDING	GO_MF_MM_FLAVIN_ADENINE_DINUCLEOTIDE_BINDING	1/318	85/17799	0.784763	0.823173	0.642144	DMGDH	1
GO_BP_MM_SYNAPTIC_TRANSMISSION	GO_BP_MM_SYNAPTIC_TRANSMISSION	1/318	87/17799	0.792422	0.829614	0.647168	PRKCG	1
GO_CC_MM_KERATIN_FILAMENT	GO_CC_MM_KERATIN_FILAMENT	1/318	87/17799	0.792422	0.829614	0.647168	KRTAP4-16	1
GO_BP_MM_REGULATION_OF_APOPTOTIC_PROCESS	GO_BP_MM_REGULATION_OF_APOPTOTIC_PROCESS	2/318	166/17799	0.799779	0.834948	0.65133	SHH/IL6	2
GO_CC_MM_LYSOSOMAL_MEMBRANE	GO_CC_MM_LYSOSOMAL_MEMBRANE	1/318	89/17799	0.799809	0.834948	0.65133	CD68	1
GO_CC_MM_TRANS-GOLGI_NETWORK	GO_CC_MM_TRANS-GOLGI_NETWORK	1/318	89/17799	0.799809	0.834948	0.65133	CLIP3	1
GO_MF_MM_TRANSCRIPTION_REGULATORY_REGION_DNA_BINDING	GO_MF_MM_TRANSCRIPTION_REGULATORY_REGION_DNA_BINDING	2/318	167/17799	0.80249	0.836948	0.652889	GLI1/SOX18	2
GO_BP_MM_SODIUM_ION_TRANSPORT	GO_BP_MM_SODIUM_ION_TRANSPORT	1/318	90/17799	0.803403	0.837102	0.653009	SCNN1B	1
GO_CC_MM_MICROTUBULE_CYTOSKELETON	GO_CC_MM_MICROTUBULE_CYTOSKELETON	1/318	91/17799	0.806933	0.839979	0.655254	SPIB	1
GO_BP_MM_VESICLE-MEDIATED_TRANSPORT	GO_BP_MM_VESICLE-MEDIATED_TRANSPORT	2/318	171/17799	0.813009	0.845498	0.659559	LAMA2/MYH7B	2
GO_MF_MM_CHROMATIN_BINDING	GO_MF_MM_CHROMATIN_BINDING	3/318	244/17799	0.814513	0.846258	0.660152	GATA2/GLI1/SVEP1	3
GO_CC_MM_CELL-CELL_JUNCTION	GO_CC_MM_CELL-CELL_JUNCTION	1/318	94/17799	0.81715	0.84819	0.66166	FNDC1	1
GO_MF_MM_RNA_POLYMERASE_II_DISTAL_ENHANCER_SEQUENCE-SPECIFIC_DNA_BINDING_TRANSCRIPTION_FACTOR_ACTIVITY	GO_MF_MM_RNA_POLYMERASE_II_DISTAL_ENHANCER_SEQUENCE-SPECIFIC_DNA_BINDING_TRANSCRIPTION_FACTOR_ACTIVITY	1/318	95/17799	0.820434	0.850791	0.663689	GLI1	1
GO_MF_MM_PROTEIN_TYROSINE_PHOSPHATASE_ACTIVITY	GO_MF_MM_PROTEIN_TYROSINE_PHOSPHATASE_ACTIVITY	1/318	96/17799	0.823659	0.852518	0.665036	PTPRT	1
GO_MF_MM_UNFOLDED_PROTEIN_BINDING	GO_MF_MM_UNFOLDED_PROTEIN_BINDING	1/318	96/17799	0.823659	0.852518	0.665036	DNAJA4	1
GO_MF_MM_PHOSPHOTRANSFERASE_ACTIVITY_ALCOHOL_GROUP_AS_ACCEPTOR	GO_MF_MM_PHOSPHOTRANSFERASE_ACTIVITY_ALCOHOL_GROUP_AS_ACCEPTOR	1/318	97/17799	0.826827	0.854987	0.666962	PIK3CG	1
GO_CC_MM_CYTOPLASMIC_VESICLE	GO_CC_MM_CYTOPLASMIC_VESICLE	1/318	98/17799	0.829938	0.857393	0.668838	APLNR	1
GO_CC_MM_POSTSYNAPTIC_DENSITY	GO_CC_MM_POSTSYNAPTIC_DENSITY	1/318	103/17799	0.844676	0.871795	0.680073	MYLK2	1
GO_MF_MM_PROTEIN_DIMERIZATION_ACTIVITY	GO_MF_MM_PROTEIN_DIMERIZATION_ACTIVITY	1/318	104/17799	0.847467	0.873851	0.681677	TCF21	1
GO_BP_MM_PROTEIN_GLYCOSYLATION	GO_BP_MM_PROTEIN_GLYCOSYLATION	1/318	106/17799	0.852901	0.878624	0.685401	B3GNT3	1
GO_BP_MM_DEPHOSPHORYLATION	GO_BP_MM_DEPHOSPHORYLATION	1/318	107/17799	0.855544	0.87969	0.686232	PTPRT	1
GO_BP_MM_NUCLEOCYTOPLASMIC_TRANSPORT	GO_BP_MM_NUCLEOCYTOPLASMIC_TRANSPORT	1/318	107/17799	0.855544	0.87969	0.686232	RAC2	1
GO_MF_MM_METHYLTRANSFERASE_ACTIVITY	GO_MF_MM_METHYLTRANSFERASE_ACTIVITY	1/318	110/17799	0.863195	0.886722	0.691717	INMT	1
GO_BP_MM_TRANSCRIPTION_FROM_RNA_POLYMERASE_II_PROMOTER	GO_BP_MM_TRANSCRIPTION_FROM_RNA_POLYMERASE_II_PROMOTER	1/318	111/17799	0.865654	0.888413	0.693037	ETS1	1
GO_CC_MM_FOCAL_ADHESION	GO_CC_MM_FOCAL_ADHESION	1/318	114/17799	0.872771	0.894877	0.698079	LIMS2	1
GO_BP_MM_SENSORY_PERCEPTION_OF_TASTE	GO_BP_MM_SENSORY_PERCEPTION_OF_TASTE	2/318	202/17799	0.878914	0.900331	0.702333	SCNN1B/APLNR	2
GO_BP_MM_POSITIVE_REGULATION_OF_I-KAPPAB_KINASE_NF-KAPPAB_CASCADE	GO_BP_MM_POSITIVE_REGULATION_OF_I-KAPPAB_KINASE_NF-KAPPAB_CASCADE	1/318	118/17799	0.881679	0.902318	0.703883	ECM1	1
GO_MF_MM_PHOSPHATASE_ACTIVITY	GO_MF_MM_PHOSPHATASE_ACTIVITY	1/318	119/17799	0.883807	0.903649	0.704922	PTPRT	1
GO_CC_MM_EARLY_ENDOSOME	GO_CC_MM_EARLY_ENDOSOME	1/318	121/17799	0.887949	0.907036	0.707564	EPHA3	1
GO_CC_MM_SYNAPTOSOME	GO_CC_MM_SYNAPTOSOME	1/318	123/17799	0.891945	0.910267	0.710084	PRKCG	1
GO_MF_MM_GTP_BINDING	GO_MF_MM_GTP_BINDING	4/318	367/17799	0.896569	0.914133	0.7131	RERG/RAC2/ABCA8A/TUBB4A	4
GO_BP_MM_PROTEIN_DEPHOSPHORYLATION	GO_BP_MM_PROTEIN_DEPHOSPHORYLATION	1/318	126/17799	0.897673	0.914405	0.713312	PTPRT	1
GO_CC_MM_CYTOSKELETON	GO_CC_MM_CYTOSKELETON	3/318	301/17799	0.907678	0.923444	0.720364	TRIB2/AVIL/DES	3
GO_BP_MM_PROTEIN_FOLDING	GO_BP_MM_PROTEIN_FOLDING	1/318	132/17799	0.908236	0.923444	0.720364	DNAJA4	1
GO_BP_MM_UBIQUITIN-DEPENDENT_PROTEIN_CATABOLIC_PROCESS	GO_BP_MM_UBIQUITIN-DEPENDENT_PROTEIN_CATABOLIC_PROCESS	1/318	133/17799	0.909888	0.924263	0.721003	USP43	1
GO_MF_MM_KINASE_ACTIVITY	GO_MF_MM_KINASE_ACTIVITY	1/318	157/17799	0.941746	0.955736	0.745555	PIK3CG	1
GO_CC_MM_POSTSYNAPTIC_MEMBRANE	GO_CC_MM_POSTSYNAPTIC_MEMBRANE	1/318	160/17799	0.94484	0.957987	0.74731	ACHE	1
GO_CC_MM_INTRACELLULAR_MEMBRANE-BOUNDED_ORGANELLE	GO_CC_MM_INTRACELLULAR_MEMBRANE-BOUNDED_ORGANELLE	2/318	257/17799	0.946002	0.958205	0.74748	RUNX1/KCNS3	2
GO_MF_MM_PROTEIN_KINASE_BINDING	GO_MF_MM_PROTEIN_KINASE_BINDING	2/318	258/17799	0.946808	0.958205	0.74748	THY1/LAX1	2
GO_CC_MM_TRANSCRIPTION_FACTOR_COMPLEX	GO_CC_MM_TRANSCRIPTION_FACTOR_COMPLEX	2/318	262/17799	0.949919	0.960464	0.749242	SPIB/ETS1	2
GO_MF_MM_MAGNESIUM_ION_BINDING	GO_MF_MM_MAGNESIUM_ION_BINDING	1/318	173/17799	0.956461	0.966185	0.753705	HPGDS	1
GO_MF_MM_PROTEIN_SERINE_THREONINE_KINASE_ACTIVITY	GO_MF_MM_PROTEIN_SERINE_THREONINE_KINASE_ACTIVITY	3/318	368/17799	0.961905	0.970787	0.757295	PIK3CG/MYLK2/PRKCG	3
GO_CC_MM_MITOCHONDRIAL_INNER_MEMBRANE	GO_CC_MM_MITOCHONDRIAL_INNER_MEMBRANE	2/318	291/17799	0.967808	0.975843	0.76124	LGALS3/UGT2B5	2
GO_BP_MM_PROTEIN_TRANSPORT	GO_BP_MM_PROTEIN_TRANSPORT	4/318	469/17799	0.96991	0.977061	0.76219	COL1A1/DUOXA1/RERG/RAC2	4
GO_CC_MM_CENTROSOME	GO_CC_MM_CENTROSOME	2/318	308/17799	0.975248	0.981534	0.765679	NDN/RAP1GAP2	2
GO_MF_MM_PHOSPHOLIPID_BINDING	GO_MF_MM_PHOSPHOLIPID_BINDING	2/318	312/17799	0.976741	0.982133	0.766146	ANXA1/RASGRF1	2
GO_BP_MM_CELL_CYCLE	GO_BP_MM_CELL_CYCLE	1/318	228/17799	0.984029	0.988551	0.771153	ANXA1	1
GO_CC_MM_MICROTUBULE	GO_CC_MM_MICROTUBULE	1/318	242/17799	0.987634	0.991261	0.773267	TUBB4A	1
GO_BP_MM_PROTEIN_UBIQUITINATION	GO_BP_MM_PROTEIN_UBIQUITINATION	1/318	268/17799	0.992314	0.995045	0.776219	NEURL1A	1
GO_BP_MM_INTRACELLULAR_PROTEIN_TRANSPORT	GO_BP_MM_INTRACELLULAR_PROTEIN_TRANSPORT	1/318	283/17799	0.99416	0.995983	0.77695	RAC2	1
GO_CC_MM_NUCLEOPLASM	GO_CC_MM_NUCLEOPLASM	1/318	338/17799	0.997871	0.998751	0.77911	NDN	1
GO_MF_MM_BINDING	GO_MF_MM_BINDING	1/318	367/17799	0.998751	0.998751	0.77911	PIK3CG	1

## Sheet: HFD TF DOWN
ID	Description	GeneRatio	BgRatio	pvalue	p.adjust	qvalue	geneID	Count
TFACTS_MM_SMAD3	TFACTS_MM_SMAD3	10/143	59/4427	1.46238e-05	0.00169949	0.0013417	COL6A1/COL1A1/COL6A2/COL5A2/COL3A1/TNC/COL1A2/ITGA11/TNFRSF11B/SERPINB5	10
TFACTS_MM_CTNNB1	TFACTS_MM_CTNNB1	23/143	276/4427	1.88832e-05	0.00169949	0.0013417	CD44/TBX3/MMP7/DPEP1/WIF1/VCAN/BMP4/APOD/IGFBP6/IL6/ECM1/CXCL5/RET/EMP1/VEGFC/NKD1/MMP2/RASGRF1/PTGS2/NOTUM/LGALS3/PHEX/TNFRSF11B	23
TFACTS_MM_SMAD7	TFACTS_MM_SMAD7	5/143	15/4427	7.583e-05	0.0045498	0.00359195	COL1A1/COL6A2/COL5A2/COL3A1/COL1A2	5
TF_MM_ZHAO_JUN	TF_MM_ZHAO_JUN	12/143	107/4427	0.000144091	0.00648409	0.00511902	COL1A1/CSF2/IL6/COL5A1/ECM1/EMILIN1/MMP2/PTGS2/LTF/FGL2/CXCL2/TNFRSF11B	12
TFACTS_MM_TFAP2A	TFACTS_MM_TFAP2A	11/143	104/4427	0.000460089	0.0165632	0.0130762	COL1A1/FBLN1/IGFBP3/ACHE/GLI1/IL6/ADM/MMP2/ETS1/PTGS2/PENK	11
TF_MM_ZHAO_SP3	TF_MM_ZHAO_SP3	7/143	50/4427	0.000987842	0.0253509	0.0200138	FBLN1/AEBP1/RECK/COL1A2/RAC2/CCL2/FGL2	7
TFACTS_MM_JUN	TFACTS_MM_JUN	11/143	115/4427	0.00108251	0.0253509	0.0200138	COL6A1/MMP7/CD68/CSF2/IL6/COL5A1/PTGS2/LTF/PENK/TNFRSF11B/SERPINB5	11
TFACTS_MM_GLI1	TFACTS_MM_GLI1	11/143	116/4427	0.0011633	0.0253509	0.0200138	SHH/HSD11B1/PLTP/TRIB2/IGFBP6/FBN2/RGS16/FA2H/PDE9A/SNAI1/TNFAIP6	11
TFACTS_MM_SP1	TFACTS_MM_SP1	24/143	388/4427	0.00126754	0.0253509	0.0200138	COL6A1/COL1A1/CD34/ADA/IGFBP3/ATP2A3/LCP1/ACHE/PAPSS2/CCL20/CXCL3/COL1A2/MMP2/THY1/ETS1/ITGA11/CYP1A1/LTF/RAC2/FGL2/ABCC8/PENK/BHLHA15/THBD	24
TF_MM_ZHAO_NFIC	TF_MM_ZHAO_NFIC	7/143	54/4427	0.00157266	0.0283079	0.0223483	COL1A1/ADA/TNC/HGF/COL1A2/CYP1A1/CCL2	7
TF_MM_WINGENDER_USF1	TF_MM_WINGENDER_USF1	5/143	30/4427	0.00243372	0.0398244	0.0314404	BMP4/HGF/PTGS2/MFAP2/CES2C	5
TF_MM_ZHAO_USF2	TF_MM_ZHAO_USF2	5/143	32/4427	0.00326535	0.0452907	0.0357559	COL1A1/BMP4/CFH/HGF/PTGS2	5
TF_MM_WINGENDER_CEBPB	TF_MM_WINGENDER_CEBPB	6/143	46/4427	0.00329961	0.0452907	0.0357559	IL6/HGF/COL1A2/PTGS2/CSF3/HAMP	6
TF_MM_ZHAO_ETS1	TF_MM_ZHAO_ETS1	7/143	62/4427	0.00352261	0.0452907	0.0357559	CSF2/ATP2A3/ECM1/MMP2/THY1/PTGS2/FGL2	7
TFACTS_MM_SP3	TFACTS_MM_SP3	10/143	121/4427	0.00532896	0.0586005	0.0462636	FBLN1/IGFBP3/AEBP1/TNC/RECK/CXCL3/COL1A2/CYP1A1/RAC2/FGL2	10
TFACTS_MM_ETS1	TFACTS_MM_ETS1	10/143	122/4427	0.00564768	0.0586005	0.0462636	CSF2/ATP2A3/BMP4/LCP1/TNC/THY1/FGL2/FGFBP1/SERPINB5/THBD	10
TFACTS_MM_REL	TFACTS_MM_REL	4/143	23/4427	0.00572766	0.0586005	0.0462636	CSF2/IL6/CXCL3/PTGS2	4
TF_MM_WINGENDER_CEBPD	TF_MM_WINGENDER_CEBPD	3/143	12/4427	0.00586005	0.0586005	0.0462636	IL6/HGF/PTGS2	3
TFACTS_MM_NFKB1	TFACTS_MM_NFKB1	10/143	128/4427	0.00788589	0.0725641	0.0572875	COL1A1/CSF2/CCL11/IL6/TNC/CXCL3/NPY1R/CSF3/CXCL2/THBD	10
TF_MM_ZHAO_PPARG	TF_MM_ZHAO_PPARG	5/143	40/4427	0.0086781	0.0725641	0.0572875	LPL/PLTP/ABCG1/HGF/PTGS2	5
TF_MM_ZHAO_CEBPB	TF_MM_ZHAO_CEBPB	4/143	26/4427	0.00897214	0.0725641	0.0572875	COL1A1/IL6/HGF/PTGS2	4
TFACTS_MM_TCF7L2	TFACTS_MM_TCF7L2	6/143	57/4427	0.00956502	0.0725641	0.0572875	CD44/MMP7/VCAN/IGFBP6/NOTUM/TNFRSF11B	6
TF_MM_ZHAO_USF1	TF_MM_ZHAO_USF1	5/143	41/4427	0.00963226	0.0725641	0.0572875	COL1A1/BMP4/CFH/HGF/PTGS2	5
TFACTS_MM_GLI2	TFACTS_MM_GLI2	8/143	93/4427	0.00978237	0.0725641	0.0572875	IGFBP3/GLI1/IL6/COL5A2/TNC/MMP2/TGFBI/LUM	8
TF_MM_WINGENDER_SP3	TF_MM_WINGENDER_SP3	8/143	94/4427	0.0104079	0.0725641	0.0572875	COL1A1/LPL/HGF/PDGFRA/MGP/FGL2/MFAP2/CES2C	8
TFACTS_MM_RELA	TFACTS_MM_RELA	7/143	76/4427	0.010769	0.0725641	0.0572875	COL1A1/CSF2/IL6/CCL20/CXCL3/PTGS2/CSF3	7
TF_MM_ZHAO_SMAD1	TF_MM_ZHAO_SMAD1	3/143	15/4427	0.0112893	0.0725641	0.0572875	COL1A1/COL3A1/COL5A1	3
TF_MM_WINGENDER_JUN	TF_MM_WINGENDER_JUN	4/143	28/4427	0.0116909	0.0725641	0.0572875	COL1A2/SCNN1B/COL12A1/PTGS2	4
TFACTS_MM_FLI1	TFACTS_MM_FLI1	4/143	28/4427	0.0116909	0.0725641	0.0572875	CD68/IGFBP3/TNC/MMP2	4
TFACTS_MM_ETV4	TFACTS_MM_ETV4	4/143	31/4427	0.016676	0.100056	0.0789918	SCNN1B/MMP2/ETS1/PTGS2	4
TFACTS_MM_JUNB	TFACTS_MM_JUNB	3/143	18/4427	0.0188654	0.109541	0.0864799	CD68/DCN/IL6	3
TF_MM_ZHAO_NFKB1	TF_MM_ZHAO_NFKB1	6/143	68/4427	0.0216276	0.121655	0.0960437	CSF2/IL6/VEGFC/MMP2/PTGS2/CXCL2	6
TF_MM_WINGENDER_EGR1	TF_MM_WINGENDER_EGR1	3/143	20/4427	0.0251486	0.133139	0.10511	ACHE/COL1A2/PTGES	3
TFACTS_MM_SMAD2	TFACTS_MM_SMAD2	3/143	20/4427	0.0251486	0.133139	0.10511	ITGA11/TNFRSF11B/SERPINB5	3
TF_MM_WINGENDER_STAT3	TF_MM_WINGENDER_STAT3	3/143	21/4427	0.0286617	0.143308	0.113138	HGF/NDN/FGL2	3
TFACTS_MM_CEBPD	TFACTS_MM_CEBPD	3/143	21/4427	0.0286617	0.143308	0.113138	IL6/PDGFRA/PTGS2	3
TF_MM_WINGENDER_POU2F1	TF_MM_WINGENDER_POU2F1	3/143	22/4427	0.0324212	0.153574	0.121243	LPL/GPX3/FGL2	3
TF_MM_ZHAO_SMAD3	TF_MM_ZHAO_SMAD3	3/143	22/4427	0.0324212	0.153574	0.121243	COL1A1/COL3A1/COL5A1	3
TF_MM_WINGENDER_STAT1	TF_MM_WINGENDER_STAT1	3/143	23/4427	0.0364252	0.168116	0.132723	LPL/CCL2/HAMP	3
TF_MM_ZHAO_CEBPA	TF_MM_ZHAO_CEBPA	4/143	40/4427	0.0387925	0.172696	0.136339	IL6/PDGFRA/PTGS2/FGL2	4
TF_MM_WINGENDER_HIF1A	TF_MM_WINGENDER_HIF1A	2/143	10/4427	0.0393363	0.172696	0.136339	RECK/SNAI1	2
TFACTS_MM_SPI1	TFACTS_MM_SPI1	6/143	79/4427	0.041258	0.17682	0.139595	CD68/LSP1/CTSK/MMP2/PTGS2/NCF4	6
TF_MM_ZHAO_TCFAP2A	TF_MM_ZHAO_TCFAP2A	7/143	102/4427	0.045687	0.191248	0.150985	FBLN1/CSF2/HGF/COL1A2/VEGFC/MMP2/PTGS2	7
TFACTS_MM_TBP	TFACTS_MM_TBP	4/143	43/4427	0.0486729	0.199116	0.157197	LPL/LCP1/DES/COL1A2	4
TF_MM_ZHAO_PPARA	TF_MM_ZHAO_PPARA	3/143	26/4427	0.0498754	0.199502	0.157501	LPL/HSD11B1/PLTP	3
TFACTS_MM_EGR1	TFACTS_MM_EGR1	6/143	84/4427	0.0530143	0.207447	0.163774	CD44/ACE/ACHE/ALOX5/IL6/COL1A2	6
TF_MM_ZHAO_ESR1	TF_MM_ZHAO_ESR1	3/143	27/4427	0.0548257	0.209971	0.165766	HGF/LTF/TNFRSF11B	3
TF_MM_ZHAO_SFPI1	TF_MM_ZHAO_SFPI1	4/143	46/4427	0.0598168	0.224313	0.177089	CTSK/HGF/PTGS2/LTF	4
TF_MM_ZHAO_PPARD	TF_MM_ZHAO_PPARD	2/143	13/4427	0.0640269	0.235201	0.185685	LPL/PLTP	2
TFACTS_MM_RUNX2	TFACTS_MM_RUNX2	2/143	15/4427	0.0826749	0.29763	0.234971	PTGS2/LGALS3	2
TF_MM_WINGENDER_SMAD4	TF_MM_WINGENDER_SMAD4	2/143	16/4427	0.0925469	0.30849	0.243545	PTGS2/HAMP	2
TF_MM_WINGENDER_USF2	TF_MM_WINGENDER_USF2	2/143	16/4427	0.0925469	0.30849	0.243545	PTGS2/MFAP2	2
TFACTS_MM_NR1H2	TFACTS_MM_NR1H2	2/143	16/4427	0.0925469	0.30849	0.243545	PLTP/ABCG1	2
TFACTS_MM_NR1H3	TFACTS_MM_NR1H3	2/143	16/4427	0.0925469	0.30849	0.243545	PLTP/ABCG1	2
TF_MM_ZHAO_RELA	TF_MM_ZHAO_RELA	3/143	34/4427	0.0954916	0.312518	0.246725	IL6/CCL2/CXCL2	3
TFACTS_MM_MITF	TFACTS_MM_MITF	3/143	35/4427	0.102087	0.328138	0.259056	CTSK/GPNMB/HPGDS	3
TFACTS_MM_CEBPB	TFACTS_MM_CEBPB	4/143	59/4427	0.121875	0.384867	0.303842	HSD11B1/IL6/PTGS2/TNFAIP6	4
TFACTS_MM_HNF1A	TFACTS_MM_HNF1A	3/143	40/4427	0.137577	0.419726	0.331363	MMP7/DDC/CYP2E1	3
TFACTS_MM_NFIC	TFACTS_MM_NFIC	3/143	40/4427	0.137577	0.419726	0.331363	COL1A1/ADA/COL1A2	3
TFACTS_MM_POU1F1	TFACTS_MM_POU1F1	4/143	64/4427	0.15101	0.453029	0.357655	LPL/SCNN1B/ETS1/FGL2	4
TFACTS_MM_FOS	TFACTS_MM_FOS	3/143	43/4427	0.160621	0.466318	0.368146	IL6/PENK/TNFAIP6	3
TFACTS_MM_SMAD4	TFACTS_MM_SMAD4	3/143	43/4427	0.160621	0.466318	0.368146	CLDN1/TNC/TNFRSF11B	3
TFACTS_MM_CREB1	TFACTS_MM_CREB1	9/143	192/4427	0.166504	0.46812	0.369569	CD68/ACHE/ANXA1/IL6/DKK2/ADM/PTGS2/LTF/PENK	9
TFACTS_MM_YY1	TFACTS_MM_YY1	3/143	44/4427	0.16855	0.46812	0.369569	COL1A1/ADA/RGS16	3
TFACTS_MM_REST	TFACTS_MM_REST	2/143	23/4427	0.169043	0.46812	0.369569	CYP2E1/CYP1A1	2
TFACTS_MM_USF1	TFACTS_MM_USF1	5/143	93/4427	0.18077	0.493009	0.389218	COL1A1/GLI1/IL6/CYP1A1/PTGS2	5
TF_MM_ZHAO_STAT3	TF_MM_ZHAO_STAT3	2/143	25/4427	0.192501	0.517168	0.40829	IL6/VEGFC	2
TF_MM_ZHAO_AR	TF_MM_ZHAO_AR	4/143	73/4427	0.209154	0.553642	0.437086	LPL/HSD11B1/PLTP/COL1A2	4
TF_MM_FRIARD_HNF-4	TF_MM_FRIARD_HNF-4	3/143	51/4427	0.22681	0.587259	0.463626	RNF145/COL6A2/SYT8	3
TF_MM_ZHAO_EGR1	TF_MM_ZHAO_EGR1	2/143	28/4427	0.228379	0.587259	0.463626	ACHE/COL1A2	2
TFACTS_MM_NFIA	TFACTS_MM_NFIA	2/143	29/4427	0.240451	0.609595	0.481259	HGF/COL1A2	2
TF_MM_ZHAO_POU2F1	TF_MM_ZHAO_POU2F1	2/143	31/4427	0.264673	0.650227	0.513337	DES/FGL2	2
TF_MM_ZHAO_CREB1	TF_MM_ZHAO_CREB1	4/143	81/4427	0.265315	0.650227	0.513337	IL6/HGF/PTGS2/LTF	4
TF_MM_ZHAO_HOXC8	TF_MM_ZHAO_HOXC8	2/143	32/4427	0.276794	0.650227	0.513337	SERPINF1/CCL2	2
TF_MM_ZHAO_ATF4	TF_MM_ZHAO_ATF4	1/143	10/4427	0.280134	0.650227	0.513337	COL1A1	1
TFACTS_MM_MYBL2	TFACTS_MM_MYBL2	1/143	10/4427	0.280134	0.650227	0.513337	COL1A1	1
TF_MM_FRIARD_NKX2-5	TF_MM_FRIARD_NKX2-5	2/143	33/4427	0.288904	0.650227	0.513337	MGP/CRISPLD2	2
TF_MM_WINGENDER_ETV4	TF_MM_WINGENDER_ETV4	1/143	11/4427	0.303439	0.650227	0.513337	FGL2	1
TF_MM_WINGENDER_REL	TF_MM_WINGENDER_REL	1/143	11/4427	0.303439	0.650227	0.513337	IL6	1
TF_MM_ZHAO_ELK1	TF_MM_ZHAO_ELK1	1/143	11/4427	0.303439	0.650227	0.513337	ACHE	1
TF_MM_ZHAO_HLF	TF_MM_ZHAO_HLF	1/143	11/4427	0.303439	0.650227	0.513337	RUNX1	1
TFACTS_MM_ATF3	TFACTS_MM_ATF3	1/143	11/4427	0.303439	0.650227	0.513337	PENK	1
TFACTS_MM_HNF1B	TFACTS_MM_HNF1B	1/143	11/4427	0.303439	0.650227	0.513337	MMP7	1
TFACTS_MM_MYOD1	TFACTS_MM_MYOD1	1/143	11/4427	0.303439	0.650227	0.513337	DES	1
TFACTS_MM_ATF2	TFACTS_MM_ATF2	2/143	35/4427	0.313048	0.651991	0.51473	PTGS2/PENK	2
TFACTS_MM_NOTCH1	TFACTS_MM_NOTCH1	2/143	35/4427	0.313048	0.651991	0.51473	GATA2/TNFRSF11B	2
TF_MM_ZHAO_BCL6	TF_MM_ZHAO_BCL6	1/143	12/4427	0.325996	0.651991	0.51473	CCL2	1
TFACTS_MM_NFATC2	TFACTS_MM_NFATC2	1/143	12/4427	0.325996	0.651991	0.51473	PTGS2	1
TFACTS_MM_NR2F2	TFACTS_MM_NR2F2	1/143	12/4427	0.325996	0.651991	0.51473	LTF	1
TFACTS_MM_POU5F1	TFACTS_MM_POU5F1	1/143	12/4427	0.325996	0.651991	0.51473	DDC	1
TF_MM_ZHAO_FOS	TF_MM_ZHAO_FOS	1/143	13/4427	0.347826	0.661095	0.521917	IL6	1
TFACTS_MM_STAT2	TFACTS_MM_STAT2	1/143	13/4427	0.347826	0.661095	0.521917	DES	1
TF_MM_WINGENDER_CREB1	TF_MM_WINGENDER_CREB1	2/143	38/4427	0.348911	0.661095	0.521917	IL6/PTGS2	2
TF_MM_WINGENDER_SFPI1	TF_MM_WINGENDER_SFPI1	2/143	38/4427	0.348911	0.661095	0.521917	ALOX5/FGL2	2
TFACTS_MM_PPARG	TFACTS_MM_PPARG	2/143	38/4427	0.348911	0.661095	0.521917	LPL/PTGS2	2
TF_MM_WINGENDER_JUND1	TF_MM_WINGENDER_JUND1	1/143	14/4427	0.368955	0.664118	0.524304	COL12A1	1
TF_MM_WINGENDER_PPARG	TF_MM_WINGENDER_PPARG	1/143	14/4427	0.368955	0.664118	0.524304	CYP1A1	1
TFACTS_MM_EBF1	TFACTS_MM_EBF1	1/143	14/4427	0.368955	0.664118	0.524304	POSTN	1
TFACTS_MM_GABPA	TFACTS_MM_GABPA	1/143	14/4427	0.368955	0.664118	0.524304	ACHE	1
TFACTS_MM_PPARD	TFACTS_MM_PPARD	1/143	14/4427	0.368955	0.664118	0.524304	LPL	1
TFACTS_MM_ELK1	TFACTS_MM_ELK1	1/143	15/4427	0.389403	0.674743	0.532692	ACHE	1
TFACTS_MM_NFYA	TFACTS_MM_NFYA	1/143	15/4427	0.389403	0.674743	0.532692	LPL	1
TF_MM_ZHAO_TRP53	TF_MM_ZHAO_TRP53	4/143	98/4427	0.390733	0.674743	0.532692	RET/MMP2/PTGS2/HIC1	4
TF_MM_FRIARD_HNF-1	TF_MM_FRIARD_HNF-1	2/143	42/4427	0.395706	0.674743	0.532692	AXL/CRISPLD2	2
TF_MM_ZHAO_HIF1A	TF_MM_ZHAO_HIF1A	2/143	43/4427	0.407173	0.674743	0.532692	CYGB/MMP2	2
TFACTS_MM_NFE2L2	TFACTS_MM_NFE2L2	1/143	16/4427	0.409194	0.674743	0.532692	ETS1	1
TFACTS_MM_TP53	TFACTS_MM_TP53	5/143	132/4427	0.424075	0.674743	0.532692	IGFBP3/VCAN/MMP2/HIC1/SERPINB5	5
TFACTS_MM_CEBPA	TFACTS_MM_CEBPA	4/143	103/4427	0.427586	0.674743	0.532692	LPL/HSD11B1/IL6/PTGS2	4
TF_MM_FRIARD_NKX6-2	TF_MM_FRIARD_NKX6-2	1/143	17/4427	0.428347	0.674743	0.532692	CD55	1
TF_MM_ZHAO_STAT1	TF_MM_ZHAO_STAT1	1/143	17/4427	0.428347	0.674743	0.532692	SHH	1
TFACTS_MM_GATA4	TFACTS_MM_GATA4	1/143	17/4427	0.428347	0.674743	0.532692	ADA	1
TF_MM_WINGENDER_ETS1	TF_MM_WINGENDER_ETS1	1/143	18/4427	0.446884	0.674743	0.532692	ATP2A3	1
TFACTS_MM_ATF4	TFACTS_MM_ATF4	1/143	18/4427	0.446884	0.674743	0.532692	PTGS2	1
TFACTS_MM_POU2F2	TFACTS_MM_POU2F2	1/143	18/4427	0.446884	0.674743	0.532692	ETS1	1
TFACTS_MM_USF2	TFACTS_MM_USF2	3/143	76/4427	0.447466	0.674743	0.532692	COL1A1/GLI1/PTGS2	3
TFACTS_MM_SREBF1	TFACTS_MM_SREBF1	2/143	47/4427	0.451948	0.674743	0.532692	GPX3/PTGS2	2
TFACTS_MM_LEF1	TFACTS_MM_LEF1	2/143	48/4427	0.462845	0.674743	0.532692	ADA/MMP7	2
TFACTS_MM_STAT5A	TFACTS_MM_STAT5A	2/143	48/4427	0.462845	0.674743	0.532692	SLPI/RGS16	2
TFACTS_MM_STAT5B	TFACTS_MM_STAT5B	2/143	48/4427	0.462845	0.674743	0.532692	SLPI/RGS16	2
TF_MM_FRIARD_ETS	TF_MM_FRIARD_ETS	1/143	19/4427	0.464823	0.674743	0.532692	CCL2	1
TF_MM_WINGENDER_CEBPA	TF_MM_WINGENDER_CEBPA	1/143	19/4427	0.464823	0.674743	0.532692	IL6	1
TF_MM_WINGENDER_FOS	TF_MM_WINGENDER_FOS	1/143	19/4427	0.464823	0.674743	0.532692	PTGS2	1
TF_MM_ZHAO_E2F-2	TF_MM_ZHAO_E2F-2	1/143	19/4427	0.464823	0.674743	0.532692	TGFBI	1
TF_MM_ZHAO_HOXA1	TF_MM_ZHAO_HOXA1	1/143	19/4427	0.464823	0.674743	0.532692	ITGA8	1
TF_MM_FRIARD_FREAC-4	TF_MM_FRIARD_FREAC-4	1/143	20/4427	0.482185	0.686997	0.542366	IFITM1	1
TFACTS_MM_PPARA	TFACTS_MM_PPARA	1/143	20/4427	0.482185	0.686997	0.542366	LPL	1
TF_MM_FRIARD_IRF-7	TF_MM_FRIARD_IRF-7	3/143	81/4427	0.489594	0.686997	0.542366	FBN1/PTGS2/SNAI1	3
TF_MM_FRIARD_HMGIY	TF_MM_FRIARD_HMGIY	1/143	21/4427	0.498987	0.686997	0.542366	CRISPLD2	1
TFACTS_MM_FOXA2	TFACTS_MM_FOXA2	1/143	21/4427	0.498987	0.686997	0.542366	DDC	1
TFACTS_MM_RXRA	TFACTS_MM_RXRA	1/143	21/4427	0.498987	0.686997	0.542366	ETS1	1
TFACTS_MM_AR	TFACTS_MM_AR	2/143	52/4427	0.505136	0.686997	0.542366	PGC/SNAI1	2
TF_MM_FRIARD_HSF2	TF_MM_FRIARD_HSF2	3/143	83/4427	0.506013	0.686997	0.542366	MGP/DNAJA4/IGF2BP2	3
TF_MM_ZHAO_E2F-1	TF_MM_ZHAO_E2F-1	1/143	22/4427	0.515248	0.686997	0.542366	TGFBI	1
TF_MM_ZHAO_RARG	TF_MM_ZHAO_RARG	1/143	22/4427	0.515248	0.686997	0.542366	COL1A2	1
TFACTS_MM_SMAD1	TFACTS_MM_SMAD1	1/143	22/4427	0.515248	0.686997	0.542366	TNFRSF11B	1
TF_MM_FRIARD_SREBP-1	TF_MM_FRIARD_SREBP-1	1/143	23/4427	0.530984	0.697644	0.550771	SULF1	1
TF_MM_ZHAO_RARB	TF_MM_ZHAO_RARB	1/143	23/4427	0.530984	0.697644	0.550771	COL1A2	1
TFACTS_MM_ATF1	TFACTS_MM_ATF1	2/143	56/4427	0.545234	0.706093	0.557442	IL6/PTGS2	2
TF_MM_WINGENDER_RELA	TF_MM_WINGENDER_RELA	1/143	24/4427	0.546214	0.706093	0.557442	IL6	1
TF_MM_FRIARD_T3R	TF_MM_FRIARD_T3R	3/143	89/4427	0.553579	0.706093	0.557442	COL6A1/COL5A1/HAMP2	3
TFACTS_MM_FOXO1	TFACTS_MM_FOXO1	5/143	153/4427	0.554943	0.706093	0.557442	LPL/DCN/BMP4/FBN1/ADM	5
TFACTS_MM_GATA1	TFACTS_MM_GATA1	1/143	25/4427	0.560952	0.706093	0.557442	GATA2	1
TFACTS_MM_JUND	TFACTS_MM_JUND	1/143	25/4427	0.560952	0.706093	0.557442	IL6	1
TFACTS_MM_STAT3	TFACTS_MM_STAT3	2/143	60/4427	0.583035	0.728793	0.575363	SLPI/IL6	2
TFACTS_MM_ETS2	TFACTS_MM_ETS2	1/143	28/4427	0.602374	0.747774	0.590348	CD34	1
TF_MM_FRIARD_NF-Y	TF_MM_FRIARD_NF-Y	6/143	195/4427	0.608714	0.750469	0.592475	EDNRA/CYP1A1/ITGBL1/FA2H/SLC2A6/KCTD14	6
TFACTS_MM_RARB	TFACTS_MM_RARB	1/143	29/4427	0.615299	0.753428	0.594811	PTGS2	1
TF_MM_ZHAO_C-MYC	TF_MM_ZHAO_C-MYC	1/143	31/4427	0.639912	0.773048	0.610301	EMP1	1
TFACTS_MM_E2F2	TFACTS_MM_E2F2	1/143	31/4427	0.639912	0.773048	0.610301	FBN2	1
TF_MM_ZHAO_RARA	TF_MM_ZHAO_RARA	1/143	33/4427	0.662961	0.790284	0.623909	COL1A2	1
TFACTS_MM_SREBF2	TFACTS_MM_SREBF2	1/143	33/4427	0.662961	0.790284	0.623909	PTGS2	1
TF_MM_ZHAO_ETV4	TF_MM_ZHAO_ETV4	1/143	34/4427	0.67393	0.794032	0.626867	MMP2	1
TF_MM_FRIARD_AP-2ALPHA	TF_MM_FRIARD_AP-2ALPHA	2/143	71/4427	0.674927	0.794032	0.626867	CSF2/FA2H	2
TFACTS_MM_E2F3	TFACTS_MM_E2F3	1/143	35/4427	0.684544	0.800116	0.631671	FBN2	1
TFACTS_MM_E2F4	TFACTS_MM_E2F4	1/143	38/4427	0.714371	0.829592	0.654941	FBN2	1
TFACTS_MM_HIF1A	TFACTS_MM_HIF1A	1/143	39/4427	0.723677	0.835012	0.65922	ADM	1
TF_MM_FRIARD_MYC	TF_MM_FRIARD_MYC	2/143	83/4427	0.755817	0.863528	0.681733	RNF145/PRDM6	2
TF_MM_FRIARD_IRF1	TF_MM_FRIARD_IRF1	1/143	43/4427	0.757986	0.863528	0.681733	LUM	1
TFACTS_MM_RBPJ	TFACTS_MM_RBPJ	2/143	87/4427	0.778668	0.881511	0.69593	GATA2/TNFRSF11B	2
TF_MM_FRIARD_MYOD	TF_MM_FRIARD_MYOD	3/143	128/4427	0.78998	0.888728	0.701627	MMP7/COL5A1/ATP6V0A4	3
TF_MM_FRIARD_C-REL	TF_MM_FRIARD_C-REL	4/143	167/4427	0.796111	0.890062	0.702681	NID1/ATP2A3/CXCL3/6430548M08RIK	4
TF_MM_FRIARD_SRF	TF_MM_FRIARD_SRF	1/143	50/4427	0.808153	0.897907	0.708874	MMP7	1
TFACTS_MM_ESR1	TFACTS_MM_ESR1	1/143	51/4427	0.814421	0.897907	0.708874	LTF	1
TF_MM_FRIARD_AML1	TF_MM_FRIARD_AML1	5/143	211/4427	0.820749	0.897907	0.708874	DKK2/MXRA8/ITGA11/GJB4/KCTD14	5
TF_MM_FRIARD_AREB6	TF_MM_FRIARD_AREB6	3/143	136/4427	0.823081	0.897907	0.708874	MMP7/ASPRV1/SNAI1	3
TF_MM_FRIARD_ELF-1	TF_MM_FRIARD_ELF-1	3/143	139/4427	0.834307	0.897965	0.70892	CYP2E1/EDNRA/CCL2	3
TFACTS_MM_RARA	TFACTS_MM_RARA	1/143	55/4427	0.837523	0.897965	0.70892	ETS1	1
TF_MM_FRIARD_MEIS1	TF_MM_FRIARD_MEIS1	7/143	290/4427	0.838101	0.897965	0.70892	CSF2/ZFPM2/COL5A2/COL5A1/FBN1/LTF/CCDC88B	7
TF_MM_ZHAO_E2F	TF_MM_ZHAO_E2F	1/143	57/4427	0.847979	0.903173	0.713031	TGFBI	1
TF_MM_FRIARD_YY1	TF_MM_FRIARD_YY1	1/143	61/4427	0.866928	0.912618	0.720488	DNAJA4	1
TF_MM_FRIARD_STAT1	TF_MM_FRIARD_STAT1	2/143	107/4427	0.866987	0.912618	0.720488	CD44/ASPRV1	2
TFACTS_MM_E2F1	TFACTS_MM_E2F1	3/143	153/4427	0.878975	0.919279	0.725747	FBN2/PDGFRA/HIC1	3
TF_MM_FRIARD_BACH2	TF_MM_FRIARD_BACH2	1/143	65/4427	0.883529	0.919279	0.725747	MMP7	1
TF_MM_FRIARD_PEA3	TF_MM_FRIARD_PEA3	5/143	242/4427	0.89981	0.927172	0.731978	MMP7/ZFPM2/WNT7B/EDNRA/CCL2	5
TFACTS_MM_FOXO3	TFACTS_MM_FOXO3	1/143	70/4427	0.901417	0.927172	0.731978	BMP4	1
TF_MM_FRIARD_IY	TF_MM_FRIARD_IY	1/143	93/4427	0.954333	0.970378	0.766088	CRISPLD2	1
TF_MM_FRIARD_SRY	TF_MM_FRIARD_SRY	1/143	94/4427	0.95584	0.970378	0.766088	NKD2	1
TF_MM_FRIARD_SOX-5	TF_MM_FRIARD_SOX-5	4/143	243/4427	0.959596	0.970378	0.766088	MMP7/DPEP1/TNC/LRRC36	4
TF_MM_FRIARD_ER	TF_MM_FRIARD_ER	3/143	270/4427	0.994021	0.997971	0.787872	COL5A1/SNAI1/LRRC36	3
TF_MM_FRIARD_LEF1	TF_MM_FRIARD_LEF1	3/143	308/4427	0.997971	0.997971	0.787872	SULF1/COL6A2/6430548M08RIK	3

## Sheet: DDC GO UP
ID	Description	GeneRatio	BgRatio	pvalue	p.adjust	qvalue	geneID	Count
GO_BP_MM_CELL_DIVISION	GO_BP_MM_CELL_DIVISION	64/839	253/17799	2.24805e-29	3.77897e-26	3.23009e-26	SPC25/NDC80/KIF11/SKA3/ZWILCH/MIS18BP1/SKA1/CDCA5/UBE2C/NEK2/CCNA2/NUF2/CCNB1/CDCA3/BIRC5/CEP55/SGOL1/NCAPH/KNTC1/CDCA8/CDK1/KIFC1/CCNB2/SMC2/CDC6/CENPH/HELLS/SGOL2/CDC45/KIF18B/CDK6/MCM5/SPAG5/PSRC1/CCNE1/NCAPD2/CENPW/AURKA/TPX2/BUB1B/SPC24/MAD2L1/CDC20/CKS2/MIS18A/TIMELESS/MASTL/NCAPG2/CDC25B/CDCA7/NCAPD3/KIF20B/HAUS4/SYCE2/RCC1/CKS1B/RAN/ARHGEF2/USP37/PMF1/SMC4/CD2AP/SMC5/ZWINT	64
GO_BP_MM_MITOSIS	GO_BP_MM_MITOSIS	49/839	191/17799	4.98637e-23	4.19105e-20	3.58232e-20	SPC25/NDC80/SKA3/ZWILCH/MIS18BP1/SKA1/CDCA5/UBE2C/PLK1/CCNA2/NUF2/CDCA3/BIRC5/CEP55/SGOL1/KNTC1/CDK1/KIFC1/CCNB2/CDC6/CENPH/HELLS/ANLN/KIF18B/NCAPD2/CENPW/AURKA/TPX2/SPC24/CDC20/MIS18A/INCENP/TIMELESS/MASTL/NCAPG2/TUBB2B/CDC25B/TUBB5/KIF20B/HAUS4/RCC1/RAN/TUBB4B/ARHGEF2/USP37/PMF1/KLHL21/CD2AP/SMC5	49
GO_BP_MM_DNA_REPLICATION	GO_BP_MM_DNA_REPLICATION	30/839	112/17799	3.74694e-15	2.09953e-12	1.79459e-12	MCM10/BRCA1/RRM2/TK1/DTL/DSCC1/CHAF1A/BLM/GINS1/CDC6/PDGFB/DBF4/POLE2/MCM5/MCM3/FEN1/CDT1/MCM2/GINS2/POLE/MCM6/MCM4/LIG4/RFC3/MCM7/RRM1/CHAF1B/LIG1/KRT7/PCNA	30
GO_CC_MM_CONDENSED_CHROMOSOME_KINETOCHORE	GO_CC_MM_CONDENSED_CHROMOSOME_KINETOCHORE	22/839	58/17799	5.57911e-15	2.34462e-12	2.00407e-12	SPC25/NDC80/ZWILCH/NEK2/NUF2/BIRC5/BUB1/SGOL1/KNTC1/CENPH/CENPM/SGOL2/SPAG5/CENPW/CENPN/BUB1B/SPC24/MAD2L1/INCENP/CENPK/RANGAP1/ZWINT	22
GO_CC_MM_CHROMOSOME_CENTROMERIC_REGION	GO_CC_MM_CHROMOSOME_CENTROMERIC_REGION	19/839	56/17799	4.14926e-12	1.39498e-09	1.19237e-09	MIS18BP1/NUF2/BIRC5/MKI67/BUB1/CENPE/SGOL1/DSCC1/CDCA8/HELLS/SGOL2/CENPW/SUV39H2/MAD2L1/CENPF/CENPA/MIS18A/INCENP/CENPL	19
GO_CC_MM_KINETOCHORE	GO_CC_MM_KINETOCHORE	18/839	57/17799	6.02559e-11	1.68817e-08	1.44297e-08	NDC80/ZWILCH/PLK1/NEK2/BUB1/CENPE/SGOL1/CENPH/SGOL2/CENPI/SPAG5/CENPW/BUB1B/MAD2L1/CENPF/INCENP/RANGAP1/ZWINT	18
GO_CC_MM_SPINDLE_POLE	GO_CC_MM_SPINDLE_POLE	20/839	72/17799	7.16868e-11	1.72151e-08	1.47147e-08	KIF11/PLK1/NEK2/CCNB1/SGOL1/KNTC1/PRC1/CDC6/CKAP2/SPAG5/PSRC1/TPX2/MAD2L1/CENPF/TOPBP1/CDC20/CDC25B/TUBG1/NEK7/CALM1	20
GO_BP_MM_CHROMOSOME_SEGREGATION	GO_BP_MM_CHROMOSOME_SEGREGATION	18/839	60/17799	1.57132e-10	3.30174e-08	2.82218e-08	SPC25/NDC80/SKA3/ESPL1/BRCA1/SKA1/NEK2/BIRC5/TOP2A/SGOL1/CENPH/SPAG5/CENPW/CENPF/INCENP/RCC1/SLC25A5/PMF1	18
GO_CC_MM_CENTROSOME	GO_CC_MM_CENTROSOME	41/839	308/17799	1.88151e-09	3.51424e-07	3.00381e-07	ESPL1/SKA1/PLK1/NEK2/CCNB1/CEP55/SGOL1/DTL/IL1RN/KIF23/CCNB2/POC1A/CDC45/CHEK1/CKAP2/MCM3/CNTLN/CCNE1/AURKA/PLK4/CKAP2L/CDC20/TACC3/MASTL/VPS37A/DYNLL1/RAB11FIP5/CDC25B/AAAS/TUBG1/NME1/CHAF1B/KIF20B/WDR67/CEP76/CEP192/NIN/RANBP1/TNFAIP3/UXT/CALM1	41
GO_BP_MM_DNA-DEPENDENT_DNA_REPLICATION_INITIATION	GO_BP_MM_DNA-DEPENDENT_DNA_REPLICATION_INITIATION	8/839	11/17799	3.43036e-09	5.76643e-07	4.92888e-07	CDC45/MCM5/MCM3/CCNE1/MCM2/MCM6/MCM4/MCM7	8
GO_CC_MM_SPINDLE	GO_CC_MM_SPINDLE	20/839	89/17799	4.26153e-09	6.14899e-07	5.25587e-07	KIF11/PLK1/KIF22/AURKB/PRC1/CDCA8/KIF23/KIFC1/CDC6/SPAG5/PSRC1/AURKA/TPX2/CENPF/INCENP/HAUS4/MYH9/RANGAP1/ARHGEF2/AKT1	20
GO_CC_MM_SPINDLE_MICROTUBULE	GO_CC_MM_SPINDLE_MICROTUBULE	12/839	30/17799	4.38952e-09	6.14899e-07	5.25587e-07	KIF11/SKA3/SKA1/PLK1/BIRC5/NUSAP1/CDK1/SPAG5/PSRC1/AURKA/TUBG1/CALM1	12
GO_MF_MM_CHEMOKINE_ACTIVITY	GO_MF_MM_CHEMOKINE_ACTIVITY	14/839	44/17799	7.36597e-09	9.52476e-07	8.14133e-07	CCL7/CXCL3/CCL2/XCL1/CCL20/CXCL5/CXCL2/CCL9/PF4/CCL5/CXCL16/CX3CL1/CXCL1/CXCL10	14
GO_BP_MM_CELLULAR_RESPONSE_TO_LIPOPOLYSACCHARIDE	GO_BP_MM_CELLULAR_RESPONSE_TO_LIPOPOLYSACCHARIDE	15/839	58/17799	4.95499e-08	5.94953e-06	5.08539e-06	CCL2/CX3CR1/TNFRSF1B/AXL/LCN2/SERPINE1/CCL5/PLSCR1/CD14/HMGB2/TSPO/TNFAIP3/ICAM1/LBP/ANKRD1	15
GO_MF_MM_ACTIN_BINDING	GO_MF_MM_ACTIN_BINDING	35/839	277/17799	1.07911e-07	1.15351e-05	9.85968e-06	TNNT2/FXYD5/FLNC/TPM2/MSN/SPIRE1/ANLN/GC/PLS1/PPP1R18/CORO2A/HOOK1/FMNL3/COTL1/ACE/CNN2/MYO1B/TPM4/INF2/PLS3/TWF1/TPM1/SCNN1A/MYH9/ACTR2/GSN/FHOD1/ARPC1B/RP2H/SNTB2/PFN1/EPB4.1L2/WDR1/VCL/DST	35
GO_BP_MM_CELL_CYCLE	GO_BP_MM_CELL_CYCLE	31/839	228/17799	1.09793e-07	1.15351e-05	9.85968e-06	MELK/CLSPN/ESCO2/UHRF1/CCNB1/AURKB/PRC1/CHAF1A/E2F8/CDK1/CDC45/CDK6/CKAP2/MCM3/PSRC1/CCNE1/GMNN/CDT1/MCM2/RBL1/CKS2/MCM6/MCM4/MCM7/CDC34/CHAF1B/SMPD3/RALB/CKS1B/RALA/SIK1	31
GO_BP_MM_CYTOKINESIS	GO_BP_MM_CYTOKINESIS	12/839	39/17799	1.3401e-07	1.32512e-05	1.13265e-05	PLK1/BIRC5/CEP55/AURKB/PRC1/RACGAP1/ANLN/INCENP/MYH9/RALB/RALA/KLHL21	12
GO_BP_MM_INFLAMMATORY_RESPONSE	GO_BP_MM_INFLAMMATORY_RESPONSE	28/839	195/17799	1.42232e-07	1.32829e-05	1.13536e-05	CCL7/CXCL3/CCL2/PTGS2/OLR1/CCL20/CXCL5/TNFRSF1B/IGFBP4/CXCL2/AXL/IL34/TNF/ITGAV/CSF1/NFKBID/CCL5/THBS1/C3/CD14/IL23A/CYBA/CXCL1/PLAA/ITGB6/AKT1/CXCL10/MIF	28
GO_CC_MM_PERINUCLEAR_REGION_OF_CYTOPLASM	GO_CC_MM_PERINUCLEAR_REGION_OF_CYTOPLASM	44/839	404/17799	2.09901e-07	1.85707e-05	1.58734e-05	CX3CR1/MT2/CDKN3/S100A6/NEURL1A/MT1/SPIRE1/TRAIP/GC/MCM3/AURKA/BUB1B/MAD2L1/S100A14/CDC20/MRE11A/GALNT3/RAD51/CSF1/PCSK9/BSPRY/TFRC/SLC11A2/INHBB/INF2/OPTN/TWF1/NME1/S100B/CTGF/HMGB2/RANGAP1/DCUN1D3/GSN/ANXA2/LAMC2/LAMB1/BNIP2/CX3CL1/EGFR/HAP1/USO1/NMRAL1/RC3H2	44
GO_BP_MM_ORGAN_REGENERATION	GO_BP_MM_ORGAN_REGENERATION	14/839	58/17799	3.51125e-07	2.95121e-05	2.52256e-05	CCL2/MKI67/CDK1/CCNE1/LCP1/LIF/TYMS/ADM/ANXA3/BAK1/TGFBR1/CAD/EIF4A1/PPAT	14
GO_BP_MM_NEGATIVE_REGULATION_OF_APOPTOTIC_PROCESS	GO_BP_MM_NEGATIVE_REGULATION_OF_APOPTOTIC_PROCESS	36/839	315/17799	8.55842e-07	6.56297e-05	5.60973e-05	CSF2/FHL2/BC021614/CX3CR1/PLK1/CD44/WNT7A/BARD1/TIMP1/IL1RN/ASNS/AXL/TNF/SERPINE1/MAD2L1/ITGAV/FIGNL1/FLT4/CD38/KITL/THBS1/G2E3/NME1/CASP4/ANGPTL4/NME2/TGFBR1/STAT5A/FAIM/CX3CL1/EGFR/EIF5A/AKT1/PLAUR/GCLC/MIF	36
GO_CC_MM_MIDBODY	GO_CC_MM_MIDBODY	15/839	71/17799	8.58926e-07	6.56297e-05	5.60973e-05	PLK1/NEK2/BIRC5/CEP55/AURKB/ECT2/KIF23/CDK1/RACGAP1/PSRC1/CENPF/INCENP/RALB/ANXA2/RALA	15
GO_BP_MM_MICROTUBULE-BASED_MOVEMENT	GO_BP_MM_MICROTUBULE-BASED_MOVEMENT	16/839	83/17799	1.37198e-06	0.000100274	8.57093e-05	KIF11/KIF22/KIF4/CENPE/KIF23/KIFC1/KIF18B/TUBD1/KIF1A/DYNLL1/TUBB2B/TUBB5/KIF20B/TUBB6/TUBB4B/TUBA1B	16
GO_BP_MM_MITOTIC_SISTER_CHROMATID_SEGREGATION	GO_BP_MM_MITOTIC_SISTER_CHROMATID_SEGREGATION	6/839	10/17799	1.92285e-06	0.00013468	0.000115118	ESPL1/NEK2/NUSAP1/SPAG5/MAD2L1/ZWINT	6
GO_BP_MM_DNA_REPAIR	GO_BP_MM_DNA_REPAIR	28/839	222/17799	2.06996e-06	0.000139184	0.000118968	RAD18/CLSPN/NEIL3/BRCA1/UHRF1/KIF22/EXO1/BARD1/CHAF1A/RAD54B/BRIP1/SMC2/BLM/CHEK1/RAD51AP1/FEN1/TOPBP1/FIGNL1/RAD51/FANCC/UBE2T/LIG4/CHAF1B/UNG/LIG1/GTF2H2/PCNA/SMC4	28
GO_CC_MM_CENTRIOLE	GO_CC_MM_CENTRIOLE	12/839	53/17799	4.97198e-06	0.000321457	0.000274767	BIRC5/CEP55/TOP2A/MPHOSPH9/POC1A/CNTLN/PLK4/TUBD1/TUBG1/CEP76/CEP192/NIN	12
GO_BP_MM_MITOTIC_CHROMOSOME_CONDENSATION	GO_BP_MM_MITOTIC_CHROMOSOME_CONDENSATION	6/839	12/17799	7.79759e-06	0.000468134	0.00040014	CDCA5/NUSAP1/NCAPH/SMC2/NCAPD3/SMC4	6
GO_BP_MM_POSITIVE_REGULATION_OF_CELL_CYCLE_CYTOKINESIS	GO_BP_MM_POSITIVE_REGULATION_OF_CELL_CYCLE_CYTOKINESIS	6/839	12/17799	7.79759e-06	0.000468134	0.00040014	AURKB/ECT2/KIF23/RACGAP1/CDC6/CDC25B	6
GO_CC_MM_PODOSOME	GO_CC_MM_PODOSOME	6/839	13/17799	1.39031e-05	0.000805898	0.000688845	ADAM8/VCAM1/AFAP1L1/TPM4/SH3PXD2B/PTPN12	6
GO_CC_MM_CONDENSED_CHROMOSOME	GO_CC_MM_CONDENSED_CHROMOSOME	8/839	26/17799	1.72509e-05	0.000966624	0.000826226	BRCA1/MKI67/TOP2A/SMC2/NCAPD2/RAD51/LIG4/HMGB2	8
GO_CC_MM_RUFFLE	GO_CC_MM_RUFFLE	13/839	70/17799	2.02594e-05	0.00109858	0.000939018	BRCA1/S100A6/CDK6/LCP1/PDLIM7/NME1/S100B/MYH9/NME2/GSN/TESC/CD2AP/ACTN1	13
GO_CC_MM_MICROTUBULE_CYTOSKELETON	GO_CC_MM_MICROTUBULE_CYTOSKELETON	15/839	91/17799	2.1383e-05	0.00112328	0.000960127	SKA1/CENPE/NCAPH/PRC1/CCNB2/CKAP2/PSRC1/TPX2/NAV1/S100A14/CDC42EP2/GTF2F2/PCNA/AKT1/DST	15
GO_CC_MM_MICROTUBULE	GO_CC_MM_MICROTUBULE	27/839	242/17799	3.02319e-05	0.00150027	0.00128236	KIF11/KIF22/NEK2/KIF4/CENPE/GTSE1/PRC1/KIF23/KIFC1/KIF18B/TPX2/NAV1/TUBD1/INCENP/HOOK1/KIF1A/DYNLL1/TUBB2B/TUBB5/KIF20B/HAUS4/TUBB6/NIN/SNTB2/TUBB4B/TUBA1B/ARHGEF2	27
GO_BP_MM_CELL_PROLIFERATION	GO_BP_MM_CELL_PROLIFERATION	21/839	164/17799	3.03446e-05	0.00150027	0.00128236	MELK/UHRF1/TNFRSF1B/UCHL1/MKI67/BUB1/AURKB/E2F8/TNF/BOK/MRE11A/TACC3/CFB/LIG4/MCM7/BAX/BAK1/PDXK/EGFR/WDR12/TXNRD1	21
GO_MF_MM_RHO_GTPASE_BINDING	GO_MF_MM_RHO_GTPASE_BINDING	8/839	28/17799	3.1556e-05	0.00151559	0.00129546	IQGAP3/ECT2/FMNL3/INF2/PAK3/PFN1/ARHGEF2/VCL	8
GO_BP_MM_RESPONSE_TO_HYPOXIA	GO_BP_MM_RESPONSE_TO_HYPOXIA	23/839	192/17799	3.8019e-05	0.00177528	0.00151743	PLAT/CCL2/PLAU/P2RX2/PDGFB/VCAM1/TNF/HSD11B2/PAM/DDIT4/CD38/EGLN3/ETS1/ADM/TFRC/ACE/HMOX1/SLC11A2/ANGPTL4/TGFBR1/CX3CL1/ICAM1/MMP14	23
GO_BP_MM_RESPONSE_TO_NUTRIENT_LEVELS	GO_BP_MM_RESPONSE_TO_NUTRIENT_LEVELS	9/839	37/17799	4.15612e-05	0.00179154	0.00153133	SERPINA7/ASNS/LCN2/GC/CCL5/ACE/CYBA/STAT5A/FOXA3	9
GO_BP_MM_CELLULAR_RESPONSE_TO_TRANSFORMING_GROWTH_FACTOR_BETA_STIMULUS	GO_BP_MM_CELLULAR_RESPONSE_TO_TRANSFORMING_GROWTH_FACTOR_BETA_STIMULUS	8/839	29/17799	4.17873e-05	0.00179154	0.00153133	WNT10A/CX3CR1/XCL1/WNT7A/CCL5/COL4A2/TGFBR1/ANKRD1	8
GO_BP_MM_PROTEIN_POLYMERIZATION	GO_BP_MM_PROTEIN_POLYMERIZATION	8/839	29/17799	4.17873e-05	0.00179154	0.00153133	FGB/TUBD1/TUBB2B/TUBB5/TUBG1/TUBB6/TUBB4B/TUBA1B	8
GO_MF_MM_INTEGRIN_BINDING	GO_MF_MM_INTEGRIN_BINDING	11/839	55/17799	4.26303e-05	0.00179154	0.00153133	ADAM8/VCAM1/THBS1/COL16A1/CTGF/LAMB1/ICAM1/MMP14/ITGB6/ACTN1/DST	11
GO_CC_MM_CONDENSED_NUCLEAR_CHROMOSOME_CENTROMERIC_REGION	GO_CC_MM_CONDENSED_NUCLEAR_CHROMOSOME_CENTROMERIC_REGION	5/839	10/17799	4.75307e-05	0.00194876	0.00166571	BUB1/SGOL1/AURKB/SGOL2/CENPA	5
GO_BP_MM_CHROMOSOME_CONDENSATION	GO_BP_MM_CHROMOSOME_CONDENSATION	6/839	16/17799	5.74283e-05	0.0022985	0.00196465	TOP2A/CDK1/NCAPD2/MUC20/NCAPG2/SMC4	6
GO_BP_MM_AGING	GO_BP_MM_AGING	17/839	123/17799	6.47704e-05	0.00250846	0.00214412	CCL2/SERPINA7/CNR1/MADCAM1/TOP2A/AURKB/TIMP1/VCAM1/TYMS/CCL5/ADM/TFRC/TSPO/BAK1/TGFBR1/GSN/EIF5A	17
GO_MF_MM_SINGLE-STRANDED_DNA_BINDING	GO_MF_MM_SINGLE-STRANDED_DNA_BINDING	10/839	48/17799	6.56588e-05	0.00250846	0.00214412	NEIL3/BLM/RAD51AP1/RAD51/MCM6/MCM4/MCM7/ALYREF/YBX1/RPA2	10
GO_BP_MM_REGULATION_OF_CELL_CYCLE	GO_BP_MM_REGULATION_OF_CELL_CYCLE	14/839	89/17799	6.80375e-05	0.00252606	0.00215916	PTGS2/CCNA2/CCNB1/DTL/CCNB2/E2F1/CCNE1/RBL1/TACC3/FIGNL1/MASTL/BAX/BAK1/SFN	14
GO_BP_MM_CHROMOSOME_ORGANIZATION	GO_BP_MM_CHROMOSOME_ORGANIZATION	8/839	31/17799	7.06275e-05	0.00252606	0.00215916	CDCA8/SMC2/BLM/CENPW/MRE11A/RAD54L/LIG4/SMC4	8
GO_CC_MM_CONDENSED_NUCLEAR_CHROMOSOME	GO_CC_MM_CONDENSED_NUCLEAR_CHROMOSOME	8/839	31/17799	7.06275e-05	0.00252606	0.00215916	BRCA1/NEK2/CHEK1/TOPBP1/MRE11A/RAD51/TUBG1/RCC1	8
GO_BP_MM_POSITIVE_REGULATION_OF_ANGIOGENESIS	GO_BP_MM_POSITIVE_REGULATION_OF_ANGIOGENESIS	12/839	71/17799	0.00010945	0.00383305	0.00327631	CX3CR1/VASH2/SERPINE1/CCL5/ETS1/ADM/THBS1/HMOX1/DDAH1/ANXA3/C3/CX3CL1	12
GO_CC_MM_CELL_SURFACE	GO_CC_MM_CELL_SURFACE	32/839	334/17799	0.000117261	0.00402276	0.00343847	PLAT/PLAU/CD44/SULF2/WNT7A/HEG1/HMMR/AXL/PDGFB/MSN/VCAM1/LY6D/TNF/ITGAV/WNT7B/BACE2/MAS1/PCSK9/CD38/MSLN/TFRC/SLC11A2/DCBLD2/CD14/LGALS1/IDE/CX3CL1/RALA/ICAM1/IGF2R/PLAUR/RC3H2	32
GO_BP_MM_MITOTIC_CELL_CYCLE	GO_BP_MM_MITOTIC_CELL_CYCLE	6/839	18/17799	0.000122751	0.00404598	0.00345832	CCNB1/CDK1/KIF18B/CENPW/AURKA/CENPF	6
GO_MF_MM_ATP-DEPENDENT_DNA_HELICASE_ACTIVITY	GO_MF_MM_ATP-DEPENDENT_DNA_HELICASE_ACTIVITY	6/839	18/17799	0.000122751	0.00404598	0.00345832	BRIP1/BLM/MRE11A/MCM6/MCM4/MCM7	6
GO_CC_MM_CHROMOSOME	GO_CC_MM_CHROMOSOME	11/839	62/17799	0.000134056	0.00433362	0.00370418	CLSPN/NUSAP1/KIF4/TOP2A/SMC2/TOPBP1/TOP3A/WHSC1/MPHOSPH10/SMC4/HMGB3	11
GO_BP_MM_NEGATIVE_REGULATION_OF_VIRAL_GENOME_REPLICATION	GO_BP_MM_NEGATIVE_REGULATION_OF_VIRAL_GENOME_REPLICATION	5/839	12/17799	0.000138011	0.0043773	0.00374151	SLPI/TNF/CCL5/PLSCR1/RSAD2	5
GO_CC_MM_ACTIN_CYTOSKELETON	GO_CC_MM_ACTIN_CYTOSKELETON	18/839	145/17799	0.000163733	0.00509695	0.00435664	FHL2/FLNC/ANLN/CORO2A/LCP1/PDLIM7/TWF1/TPM1/CORO1C/MYH9/GSN/LAD1/PAK3/PFN1/CSRP1/WDR1/VCL/DST	18
GO_BP_MM_RESPONSE_TO_WOUNDING	GO_BP_MM_RESPONSE_TO_WOUNDING	10/839	54/17799	0.000186013	0.00568523	0.00485947	CCL2/SERPINE2/PDGFB/ETS1/ADM/ABHD2/BAX/PLLP/TNFAIP3/DST	10
GO_MF_MM_STRUCTURAL_CONSTITUENT_OF_CYTOSKELETON	GO_MF_MM_STRUCTURAL_CONSTITUENT_OF_CYTOSKELETON	7/839	27/17799	0.000195455	0.00586715	0.00501497	TNNT2/TPM2/TUBB5/TUBG1/TPM1/TUBB4B/TUBA1B	7
GO_CC_MM_REPLICATION_FORK	GO_CC_MM_REPLICATION_FORK	5/839	13/17799	0.000215579	0.00635768	0.00543425	RAD18/BLM/CHEK1/DNMT1/PCNA	5
GO_BP_MM_FEMALE_PREGNANCY	GO_BP_MM_FEMALE_PREGNANCY	10/839	58/17799	0.000342137	0.00991607	0.00847581	IL1RN/GC/GPX3/HSD11B2/CD38/ETS1/ADM/CLDN4/STAT5A/CAD	10
GO_BP_MM_RESPONSE_TO_CYTOKINE_STIMULUS	GO_BP_MM_RESPONSE_TO_CYTOKINE_STIMULUS	12/839	81/17799	0.000392934	0.0111953	0.00956922	PTGS2/TIMP1/SERPINA1B/CCNE1/CDKN2B/SERPINE1/ACP5/CCL5/CD38/TNFRSF11A/CXCL16/OSMR	12
GO_MF_MM_PEPTIDE_BINDING	GO_MF_MM_PEPTIDE_BINDING	9/839	49/17799	0.000413426	0.0115828	0.00990045	PPIC/MAS1/ACE/TUBB2B/MEMO1/TUBB5/TUBB4B/PREP/CRIP1	9
GO_BP_MM_NEGATIVE_REGULATION_OF_ANGIOGENESIS	GO_BP_MM_NEGATIVE_REGULATION_OF_ANGIOGENESIS	9/839	50/17799	0.000483393	0.0133105	0.0113772	CCL2/CX3CR1/VASH1/SEMA3E/LIF/PF4/THBS1/COL4A2/CXCL10	9
GO_CC_MM_CLEAVAGE_FURROW	GO_CC_MM_CLEAVAGE_FURROW	7/839	31/17799	0.000490927	0.0133105	0.0113772	CEP55/ECT2/RACGAP1/PLK4/MASTL/MYH9/RALA	7
GO_BP_MM_IMMUNE_RESPONSE	GO_BP_MM_IMMUNE_RESPONSE	22/839	214/17799	0.000507663	0.0135457	0.0115783	CSF2/CCL7/CXCL3/CCL2/XCL1/CCL20/CXCL5/CXCL2/CSF3/TNF/LIF/CCL9/LTB/PF4/CCL5/THBS1/PLSCR1/IL23A/TINAGL1/CX3CL1/CXCL1/CXCL10	22
GO_MF_MM_PHOSPHATIDYLINOSITOL-4_5-BISPHOSPHATE_BINDING	GO_MF_MM_PHOSPHATIDYLINOSITOL-4_5-BISPHOSPHATE_BINDING	6/839	23/17799	0.000545279	0.0143221	0.0122419	PHLDA3/MYO1B/TWF1/LDLRAP1/ANXA2/PFN1	6
GO_BP_MM_RESPONSE_TO_ORGANIC_CYCLIC_COMPOUND	GO_BP_MM_RESPONSE_TO_ORGANIC_CYCLIC_COMPOUND	17/839	147/17799	0.000569144	0.014719	0.0125811	PTGS2/AK4/IL1RN/CDK1/PDGFB/GPX3/CCNE1/CDKN2B/CD83/CCL5/AHR/CTGF/BAK1/TGFBR1/AACS/ICAM1/MMP14	17
GO_CC_MM_BASEMENT_MEMBRANE	GO_CC_MM_BASEMENT_MEMBRANE	12/839	85/17799	0.000615488	0.015483	0.0132342	NID1/TIMP1/LAMB3/RUNX1/LAMA3/COL4A2/COL4A6/LAD1/ANXA2/LAMC2/LAMB1/COL4A1	12
GO_BP_MM_RESPONSE_TO_GLUCOCORTICOID_STIMULUS	GO_BP_MM_RESPONSE_TO_GLUCOCORTICOID_STIMULUS	13/839	97/17799	0.000617111	0.015483	0.0132342	PLAT/CCL2/PTGS2/IL1RN/TNF/SERPINE1/HSD11B2/PAM/TYMS/CCL5/ADM/ANXA3/ABCG2	13
GO_BP_MM_POSITIVE_REGULATION_OF_OSTEOCLAST_DIFFERENTIATION	GO_BP_MM_POSITIVE_REGULATION_OF_OSTEOCLAST_DIFFERENTIATION	5/839	16/17799	0.000650056	0.0160698	0.0137357	TNF/CSF1/CCL5/CAR2/IL23A	5
GO_BP_MM_RESPONSE_TO_DRUG	GO_BP_MM_RESPONSE_TO_DRUG	29/839	322/17799	0.000665289	0.016208	0.0138538	CCL2/SERPINA7/PTGS2/MMP7/CCNB1/TOP2A/IL1RN/CDK1/PDGFB/LCN2/GPX3/CCNE1/TNF/HSD11B2/PAM/TYMS/MAS1/RAD54L/CCL5/CD38/THBS1/NME1/LGALS1/CYBA/TSPO/BAK1/AACS/BDNF/ICAM1	29
GO_BP_MM_RESPONSE_TO_DNA_DAMAGE_STIMULUS	GO_BP_MM_RESPONSE_TO_DNA_DAMAGE_STIMULUS	16/839	137/17799	0.000733798	0.0176216	0.0150622	RAD18/TOP2A/DTL/BLM/CHEK1/TOPBP1/MRE11A/RAD51/RAD54L/TIMELESS/MASTL/UBE2T/MCM7/BAX/PMAIP1/CIB1	16
GO_CC_MM_EXTRACELLULAR_MATRIX	GO_CC_MM_EXTRACELLULAR_MATRIX	20/839	193/17799	0.000810255	0.0183626	0.0156955	LTBP2/LTBP1/MMP7/NID1/SLPI/WNT7A/TIMP1/SERPINE2/POSTN/SERPINE1/IGFBP7/LGALS3/MMP23/PXDN/THBS1/PLSCR1/COL4A2/LGALS1/TINAGL1/MMP14	20
GO_BP_MM_MITOTIC_CELL_CYCLE_CHECKPOINT	GO_BP_MM_MITOTIC_CELL_CYCLE_CHECKPOINT	4/839	10/17799	0.000819269	0.0183626	0.0156955	ZWILCH/KNTC1/MAD2L1/ZWINT	4
GO_BP_MM_REGULATION_OF_DNA_REPLICATION	GO_BP_MM_REGULATION_OF_DNA_REPLICATION	4/839	10/17799	0.000819269	0.0183626	0.0156955	ESCO2/DSCC1/GMNN/PCNA	4
GO_CC_MM_MITOTIC_SPINDLE	GO_CC_MM_MITOTIC_SPINDLE	4/839	10/17799	0.000819269	0.0183626	0.0156955	ECT2/KIF23/RACGAP1/SPAG5	4
GO_MF_MM_PALMITOYLTRANSFERASE_ACTIVITY	GO_MF_MM_PALMITOYLTRANSFERASE_ACTIVITY	4/839	10/17799	0.000819269	0.0183626	0.0156955	ZDHHC2/ZDHHC15/ZDHHC13/ZDHHC21	4
GO_BP_MM_G2_M_TRANSITION_OF_MITOTIC_CELL_CYCLE	GO_BP_MM_G2_M_TRANSITION_OF_MITOTIC_CELL_CYCLE	6/839	25/17799	0.000882531	0.0193861	0.0165703	FOXM1/PLK1/BIRC5/CHEK1/CDKN2B/MASTL	6
GO_BP_MM_REGULATION_OF_CYCLIN-DEPENDENT_PROTEIN_KINASE_ACTIVITY	GO_BP_MM_REGULATION_OF_CYCLIN-DEPENDENT_PROTEIN_KINASE_ACTIVITY	7/839	34/17799	0.000888	0.0193861	0.0165703	CCNA2/CCNB1/CCNB2/BLM/CCNE1/CDKN2B/SFN	7
GO_MF_MM_MICROTUBULE_BINDING	GO_MF_MM_MICROTUBULE_BINDING	12/839	89/17799	0.000935288	0.0201567	0.017229	KIF11/SKA1/PLK1/BIRC5/NUSAP1/KIF23/RACGAP1/SPAG5/PSRC1/HOOK1/ARHGEF2/DST	12
GO_BP_MM_RESPONSE_TO_IONIZING_RADIATION	GO_BP_MM_RESPONSE_TO_IONIZING_RADIATION	8/839	45/17799	0.0010764	0.0226178	0.0193327	BRCA1/VCAM1/TOPBP1/AEN/RAD54L/LIG4/BAX/ICAM1	8
GO_CC_MM_STRESS_FIBER	GO_CC_MM_STRESS_FIBER	8/839	45/17799	0.0010764	0.0226178	0.0193327	PDLIM7/CNN2/TPM4/FBLIM1/MYH9/FHOD1/VCL/ACTN1	8
GO_BP_MM_POSITIVE_REGULATION_OF_MITOTIC_CELL_CYCLE	GO_BP_MM_POSITIVE_REGULATION_OF_MITOTIC_CELL_CYCLE	6/839	26/17799	0.00110203	0.0226504	0.0193605	CCNB1/BIRC5/ASNS/CDK1/CDC25B/STAT5A	6
GO_BP_MM_APOPTOTIC_PROCESS	GO_BP_MM_APOPTOTIC_PROCESS	38/839	476/17799	0.0011049	0.0226504	0.0193605	MELK/KRT20/CDK1/PGLYRP1/LCN2/E2F1/CKAP2/TNF/TPX2/BUB1B/BOK/PHLDA3/DRAM1/AEN/DDIT4/EGLN3/DYNLL1/G2E3/1810011O10RIK/PLSCR1/CASP4/CIAPIN1/BAX/BAK1/TGFBR1/RBM25/RALB/SLK/GSN/FAIM/BNIP2/PMAIP1/EIF5A/SFN/AKT1/CIB1/RIPK1/CRIP1	38
GO_BP_MM_REGULATION_OF_CELL_PROLIFERATION	GO_BP_MM_REGULATION_OF_CELL_PROLIFERATION	15/839	130/17799	0.00120187	0.0243416	0.0208061	CSF2/FOXM1/PLAU/PTGS2/MMP7/WNT7A/PDGFB/TNF/SERPINE1/EGLN3/CNN2/DNMT1/CDCA7/EGFR/MIF	15
GO_BP_MM_RESPONSE_TO_MANGANESE_ION	GO_BP_MM_RESPONSE_TO_MANGANESE_ION	4/839	11/17799	0.00123956	0.0245142	0.0209536	PTGS2/TFRC/SLC11A2/TSPO	4
GO_CC_MM_PLATELET_ALPHA_GRANULE	GO_CC_MM_PLATELET_ALPHA_GRANULE	4/839	11/17799	0.00123956	0.0245142	0.0209536	FGB/SERPINE2/PF4/THBS1	4
GO_BP_MM_INDUCTION_OF_APOPTOSIS	GO_BP_MM_INDUCTION_OF_APOPTOSIS	17/839	158/17799	0.00128589	0.0251346	0.0214839	RIPK3/TNF/MUC20/BOK/PHLDA3/WNT7B/PCSK9/ETS1/THBS1/ZMAT3/CASP4/S100B/BAX/TGFBR1/PMAIP1/EIF5A/RIPK1	17
GO_MF_MM_PHOSPHATASE_ACTIVITY	GO_MF_MM_PHOSPHATASE_ACTIVITY	14/839	119/17799	0.00143274	0.0276832	0.0236623	DUSP9/CDKN3/DUSP4/CTDSPL2/DUSP7/PTP4A3/PTPRS/MTMR7/MTMR2/RNGTT/SBF1/PGP/PTPN12/MTMR11	14
GO_BP_MM_POSITIVE_REGULATION_OF_CELL_GROWTH	GO_BP_MM_POSITIVE_REGULATION_OF_CELL_GROWTH	9/839	58/17799	0.00146835	0.0280487	0.0239748	FLT4/CD38/CXCL16/CYBA/KRT17/TGFBR1/ACSL4/SFN/AKT1	9
GO_BP_MM_NEGATIVE_REGULATION_OF_TUMOR_NECROSIS_FACTOR_PRODUCTION	GO_BP_MM_NEGATIVE_REGULATION_OF_TUMOR_NECROSIS_FACTOR_PRODUCTION	6/839	28/17799	0.00166404	0.0308768	0.0263921	BC021614/AXL/ACP5/TSPO/TNFAIP3/LBP	6
GO_BP_MM_POSITIVE_REGULATION_OF_NITRIC_OXIDE_BIOSYNTHETIC_PROCESS	GO_BP_MM_POSITIVE_REGULATION_OF_NITRIC_OXIDE_BIOSYNTHETIC_PROCESS	6/839	28/17799	0.00166404	0.0308768	0.0263921	PTGS2/TNF/DDAH1/EGFR/ICAM1/AKT1	6
GO_CC_MM_PROTEIN_COMPLEX	GO_CC_MM_PROTEIN_COMPLEX	26/839	295/17799	0.0016788	0.0308768	0.0263921	BC021614/PTGS2/NEK2/TOP2A/CDCA8/CDC20/TUBD1/INCENP/PF4/ORAI1/TUBB2B/TUBB5/TUBG1/HMGB2/MYH9/SDC3/TUBB6/TGFBR1/CAD/GSN/ANXA2/TUBB4B/SSX2IP/TUBA1B/VCL/RIPK1	26
GO_BP_MM_POSITIVE_REGULATION_OF_GENE_EXPRESSION	GO_BP_MM_POSITIVE_REGULATION_OF_GENE_EXPRESSION	17/839	162/17799	0.00168987	0.0308768	0.0263921	CSF2/IQGAP3/WNT10A/CD44/CDK1/LCN2/CDK6/E2F1/WNT7B/CSF1/CCL5/CNN2/DNMT1/MAF/CTGF/TESC/PLAUR	17
GO_BP_MM_CTP_BIOSYNTHETIC_PROCESS	GO_BP_MM_CTP_BIOSYNTHETIC_PROCESS	4/839	12/17799	0.00179034	0.0322689	0.027582	CTPS/NME1/NME2/RP2H	4
GO_MF_MM_GTPASE_ACTIVATOR_ACTIVITY	GO_MF_MM_GTPASE_ACTIVATOR_ACTIVITY	14/839	122/17799	0.00182007	0.0322689	0.027582	IQGAP3/RGS4/ECT2/RACGAP1/ARHGAP11A/RGS5/RIN1/RGS3/SIPA1L2/RANBP1/RIN2/RP2H/ARHGAP8/RGS19	14
GO_BP_MM_RESPONSE_TO_ORGANIC_SUBSTANCE	GO_BP_MM_RESPONSE_TO_ORGANIC_SUBSTANCE	12/839	96/17799	0.00182364	0.0322689	0.027582	BRCA1/PTGS2/AK4/P2RX2/TIMP1/PDGFB/GPX3/DUSP4/ADM/CAR2/TFRC/PFN1	12
GO_BP_MM_WOUND_HEALING	GO_BP_MM_WOUND_HEALING	10/839	72/17799	0.00194332	0.0340284	0.0290859	PLAU/TIMP1/PDGFB/SERPINE1/VANGL2/CNN2/DCBLD2/ELK3/GSN/CX3CL1	10
GO_BP_MM_CELLULAR_RESPONSE_TO_GLUCOSE_STIMULUS	GO_BP_MM_CELLULAR_RESPONSE_TO_GLUCOSE_STIMULUS	5/839	21/17799	0.0024891	0.0422836	0.0361421	VCAM1/LGALS1/CYBA/AACS/ICAM1	5
GO_BP_MM_MORPHOGENESIS_OF_AN_EPITHELIUM	GO_BP_MM_MORPHOGENESIS_OF_AN_EPITHELIUM	5/839	21/17799	0.0024891	0.0422836	0.0361421	CAR9/TIMELESS/CAR2/KRT17/VCL	5
GO_BP_MM_POSITIVE_REGULATION_OF_SURVIVAL_GENE_PRODUCT_EXPRESSION	GO_BP_MM_POSITIVE_REGULATION_OF_SURVIVAL_GENE_PRODUCT_EXPRESSION	4/839	13/17799	0.00249023	0.0422836	0.0361421	CSF2/MT1/TGFBR1/STAT5A	4
GO_BP_MM_LACTATION	GO_BP_MM_LACTATION	7/839	41/17799	0.00278766	0.0468605	0.0400542	HK2/NEURL1A/GC/SOCS2/NME1/STAT5A/PPAT	7
GO_BP_MM_LEUKOCYTE_CELL-CELL_ADHESION	GO_BP_MM_LEUKOCYTE_CELL-CELL_ADHESION	5/839	22/17799	0.00309777	0.0515579	0.0440693	OLR1/MSN/VCAM1/CCL5/ICAM1	5
GO_BP_MM_RESPONSE_TO_ORGANIC_NITROGEN	GO_BP_MM_RESPONSE_TO_ORGANIC_NITROGEN	7/839	42/17799	0.00321166	0.0529294	0.0452416	PTGS2/AK4/IL1RN/CDK1/CCNE1/UBD/AACS	7
GO_BP_MM_ANTI-APOPTOSIS	GO_BP_MM_ANTI-APOPTOSIS	14/839	130/17799	0.00329535	0.0537815	0.0459699	CCL2/BIRC5/CDK1/HELLS/TNF/ETS1/HMOX1/IER3/CIAPIN1/FAIM/TNFAIP3/BDNF/AKT1/GCLC	14
GO_BP_MM_GLUTAMINE_METABOLIC_PROCESS	GO_BP_MM_GLUTAMINE_METABOLIC_PROCESS	4/839	14/17799	0.00335738	0.0542668	0.0463848	ASNS/CTPS/PFAS/GLS	4
GO_BP_MM_G2_M_TRANSITION_DNA_DAMAGE_CHECKPOINT	GO_BP_MM_G2_M_TRANSITION_DNA_DAMAGE_CHECKPOINT	5/839	23/17799	0.00380679	0.0609449	0.052093	CLSPN/BRCA1/PLK1/DTL/CHEK1	5
GO_BP_MM_RESPONSE_TO_LIPOPOLYSACCHARIDE	GO_BP_MM_RESPONSE_TO_LIPOPOLYSACCHARIDE	16/839	161/17799	0.00393422	0.062327	0.0532742	CCL2/CNR1/PTGS2/CXCL5/S100A14/ACP5/CCL5/TNFRSF11A/ADM/PLCG2/ACE/CD14/TIRAP/ICAM1/LBP/CXCL10	16
GO_BP_MM_CELLULAR_RESPONSE_TO_AMINO_ACID_STIMULUS	GO_BP_MM_CELLULAR_RESPONSE_TO_AMINO_ACID_STIMULUS	6/839	33/17799	0.00400435	0.062327	0.0532742	TNF/DNMT1/COL16A1/COL4A6/CYBA/COL4A1	6
GO_BP_MM_EMBRYO_IMPLANTATION	GO_BP_MM_EMBRYO_IMPLANTATION	6/839	33/17799	0.00400435	0.062327	0.0532742	PLAU/PTGS2/SERPINE2/LIF/TGFBR1/LAMB1	6
GO_BP_MM_CELLULAR_RESPONSE_TO_HYPOXIA	GO_BP_MM_CELLULAR_RESPONSE_TO_HYPOXIA	7/839	44/17799	0.00420542	0.0648561	0.055436	PTGS2/ADAM8/CCNB1/E2F1/HMOX1/PMAIP1/ICAM1	7
GO_BP_MM_POSITIVE_REGULATION_VASCULAR_ENDOTHELIAL_GROWTH_FACTOR_PRODUCTION	GO_BP_MM_POSITIVE_REGULATION_VASCULAR_ENDOTHELIAL_GROWTH_FACTOR_PRODUCTION	4/839	15/17799	0.0044092	0.0661774	0.0565654	PTGS2/SULF2/FLT4/C3	4
GO_BP_MM_SPROUTING_ANGIOGENESIS	GO_BP_MM_SPROUTING_ANGIOGENESIS	4/839	15/17799	0.0044092	0.0661774	0.0565654	SEMA3E/NRARP/FLT4/THBS1	4
GO_CC_MM_NUCLEAR_CHROMOSOME	GO_CC_MM_NUCLEAR_CHROMOSOME	4/839	15/17799	0.0044092	0.0661774	0.0565654	TOP2A/SMC2/NCAPD2/BAZ1A	4
GO_MF_MM_MICROTUBULE_MOTOR_ACTIVITY	GO_MF_MM_MICROTUBULE_MOTOR_ACTIVITY	9/839	68/17799	0.00447506	0.0665715	0.0569023	KIF11/KIF22/KIF4/CENPE/KIF23/KIFC1/KIF18B/KIF1A/KIF20B	9
GO_BP_MM_DEPHOSPHORYLATION	GO_BP_MM_DEPHOSPHORYLATION	12/839	107/17799	0.00452539	0.0667297	0.0570375	DUSP9/CDKN3/DUSP4/ACP5/DUSP7/PTP4A3/PTPRS/MTMR7/MTMR2/RNGTT/SBF1/PTPN12	12
GO_BP_MM_POSITIVE_REGULATION_OF_ENDOTHELIAL_CELL_PROLIFERATION	GO_BP_MM_POSITIVE_REGULATION_OF_ENDOTHELIAL_CELL_PROLIFERATION	7/839	45/17799	0.00478182	0.0698977	0.0597454	CCL2/VASH2/PDGFB/NRARP/FLT4/HMGB2/CYBA	7
GO_CC_MM_INTRACELLULAR_MEMBRANE-BOUNDED_ORGANELLE	GO_CC_MM_INTRACELLULAR_MEMBRANE-BOUNDED_ORGANELLE	22/839	257/17799	0.00518525	0.0737848	0.0630679	FOXM1/CD40/UCHL1/POLE2/MCM3/MBNL3/RUNX1/PHLDA3/KAZN/VPS37A/ZDHHC13/G2E3/RAB11FIP5/ELK3/FBLIM1/CTGF/FOXN2/ME2/BNIP2/PARM1/YBX1/AGFG1	22
GO_BP_MM_CELL_ADHESION	GO_BP_MM_CELL_ADHESION	26/839	321/17799	0.00524228	0.0737848	0.0630679	MADCAM1/CD44/TROAP/VCAM1/LAMB3/POSTN/LAMA3/ITGAV/IGFBP7/MSLN/KITL/THBS1/9430020K01RIK/MCAM/DCBLD2/EFNB2/COL16A1/MYH9/SDC3/PTPRS/SSX2IP/LAMB1/CX3CL1/ICAM1/ITGB6/VCL	26
GO_BP_MM_POSITIVE_REGULATION_OF_APOPTOTIC_PROCESS	GO_BP_MM_POSITIVE_REGULATION_OF_APOPTOTIC_PROCESS	19/839	211/17799	0.00529713	0.0737848	0.0630679	MELK/CNR1/PTGS2/TOP2A/BARD1/ECT2/TNF/NUPR1/BOK/ACE/IER3/UBD/TSPO/BAX/BAK1/DCUN1D3/PMAIP1/RIPK1/ANKRD1	19
GO_BP_MM_POSITIVE_REGULATION_OF_JNK_CASCADE	GO_BP_MM_POSITIVE_REGULATION_OF_JNK_CASCADE	7/839	46/17799	0.00541573	0.0737848	0.0630679	WNT7A/TNF/WNT7B/FLT4/TIRAP/CTGF/LMNB1	7
GO_BP_MM_RESPONSE_TO_GAMMA_RADIATION	GO_BP_MM_RESPONSE_TO_GAMMA_RADIATION	6/839	35/17799	0.00541835	0.0737848	0.0630679	CCL2/LIG4/BAX/BAK1/DCUN1D3/CXCL10	6
GO_BP_MM_RESPONSE_TO_STEROID_HORMONE_STIMULUS	GO_BP_MM_RESPONSE_TO_STEROID_HORMONE_STIMULUS	6/839	35/17799	0.00541835	0.0737848	0.0630679	SERPINA7/GC/CCNE1/HSD11B2/CAR2/HMGB2	6
GO_MF_MM_MANGANESE_ION_BINDING	GO_MF_MM_MANGANESE_ION_BINDING	6/839	35/17799	0.00541835	0.0737848	0.0630679	FEN1/MRE11A/GALNT3/SLC11A2/XPNPEP1/ME1	6
GO_MF_MM_PROTEIN_TYROSINE_PHOSPHATASE_ACTIVITY	GO_MF_MM_PROTEIN_TYROSINE_PHOSPHATASE_ACTIVITY	11/839	96/17799	0.00546545	0.0737848	0.0630679	DUSP9/CDKN3/DUSP4/CDC25B/DUSP7/PTP4A3/PTPRS/MTMR7/MTMR2/RNGTT/PTPN12	11
GO_BP_MM_RESPONSE_TO_TUMOR_NECROSIS_FACTOR	GO_BP_MM_RESPONSE_TO_TUMOR_NECROSIS_FACTOR	5/839	25/17799	0.00556039	0.0737848	0.0630679	CCL5/TNFRSF11A/CXCL16/UBD/RIPK1	5
GO_MF_MM_EXTRACELLULAR_MATRIX_STRUCTURAL_CONSTITUENT	GO_MF_MM_EXTRACELLULAR_MATRIX_STRUCTURAL_CONSTITUENT	5/839	25/17799	0.00556039	0.0737848	0.0630679	PXDN/COL4A2/COL4A6/LAMB1/COL4A1	5
GO_BP_MM_PROTEIN_HOMOOLIGOMERIZATION	GO_BP_MM_PROTEIN_HOMOOLIGOMERIZATION	14/839	138/17799	0.00562966	0.0737848	0.0630679	P2RX2/ECT2/MUC20/RAD51/KCTD14/HMOX1/KCTD20/STOM/ANGPTL4/BAX/EHD1/KCTD5/IDE/EHD4	14
GO_BP_MM_DEFENSE_RESPONSE_TO_GRAM-NEGATIVE_BACTERIUM	GO_BP_MM_DEFENSE_RESPONSE_TO_GRAM-NEGATIVE_BACTERIUM	4/839	16/17799	0.00566225	0.0737848	0.0630679	MMP7/SERPINE1/IL23A/LBP	4
GO_BP_MM_DNA_DUPLEX_UNWINDING	GO_BP_MM_DNA_DUPLEX_UNWINDING	4/839	16/17799	0.00566225	0.0737848	0.0630679	MRE11A/MCM6/MCM4/MCM7	4
GO_BP_MM_ESTABLISHMENT_OF_MITOTIC_SPINDLE_ORIENTATION	GO_BP_MM_ESTABLISHMENT_OF_MITOTIC_SPINDLE_ORIENTATION	4/839	16/17799	0.00566225	0.0737848	0.0630679	NDC80/CENPA/GPSM2/ARHGEF2	4
GO_BP_MM_POSITIVE_REGULATION_OF_DNA_REPLICATION	GO_BP_MM_POSITIVE_REGULATION_OF_DNA_REPLICATION	6/839	36/17799	0.00624811	0.0807929	0.0690581	CSF2/CDK1/PDGFB/MAS1/KITL/EGFR	6
GO_BP_MM_ACTIN_CYTOSKELETON_ORGANIZATION	GO_BP_MM_ACTIN_CYTOSKELETON_ORGANIZATION	12/839	112/17799	0.00651909	0.0836533	0.0715031	PDGFB/CORO2A/FMNL3/PDLIM7/INF2/CDC42EP2/CORO1C/ACTR2/FHOD1/RAN/PFN1/CSRP1	12
GO_BP_MM_ONE-CARBON_METABOLIC_PROCESS	GO_BP_MM_ONE-CARBON_METABOLIC_PROCESS	5/839	26/17799	0.0066219	0.0843289	0.0720805	MTHFD2/DHFR/CAR9/CAR2/AHCY	5
GO_BP_MM_POSITIVE_REGULATION_OF_INTERLEUKIN-8_PRODUCTION	GO_BP_MM_POSITIVE_REGULATION_OF_INTERLEUKIN-8_PRODUCTION	4/839	17/17799	0.00713205	0.0885802	0.0757143	SERPINE1/TIRAP/LBP/RIPK1	4
GO_BP_MM_T_CELL_HOMEOSTASIS	GO_BP_MM_T_CELL_HOMEOSTASIS	4/839	17/17799	0.00713205	0.0885802	0.0757143	JAK3/CCNB2/STAT5A/PMAIP1	4
GO_BP_MM_POSITIVE_REGULATION_OF_FIBROBLAST_PROLIFERATION	GO_BP_MM_POSITIVE_REGULATION_OF_FIBROBLAST_PROLIFERATION	6/839	37/17799	0.00716652	0.0885802	0.0757143	PDGFB/CDK6/E2F1/LIG4/EGFR/MIF	6
GO_BP_MM_POSITIVE_REGULATION_OF_MAP_KINASE_ACTIVITY	GO_BP_MM_POSITIVE_REGULATION_OF_MAP_KINASE_ACTIVITY	6/839	37/17799	0.00716652	0.0885802	0.0757143	CD40/PDGFB/TNF/KITL/EGFR/MIF	6
GO_MF_MM_KINASE_ACTIVITY	GO_MF_MM_KINASE_ACTIVITY	15/839	157/17799	0.0073604	0.0903051	0.0771887	PLAU/DUSP9/CCNB1/AKAP12/CDK1/CDK6/CCNE1/CKB/CDKN2B/CKS2/MASTL/PAK3/EGFR/AKT1/PLAUR	15
GO_BP_MM_RESPONSE_TO_ESTRADIOL_STIMULUS	GO_BP_MM_RESPONSE_TO_ESTRADIOL_STIMULUS	11/839	100/17799	0.00741351	0.0903051	0.0771887	BRCA1/PTGS2/PDGFB/GC/CCNE1/AURKA/PAM/CD38/ETS1/AHR/CTGF	11
GO_BP_MM_CELLULAR_RESPONSE_TO_INTERLEUKIN-1	GO_BP_MM_CELLULAR_RESPONSE_TO_INTERLEUKIN-1	5/839	27/17799	0.00781755	0.0932008	0.0796638	CCL2/LCN2/CCL5/ICAM1/ANKRD1	5
GO_BP_MM_PROTEIN_KINASE_B_SIGNALING_CASCADE	GO_BP_MM_PROTEIN_KINASE_B_SIGNALING_CASCADE	5/839	27/17799	0.00781755	0.0932008	0.0796638	CCL2/AXL/TNF/CCL5/AKT1	5
GO_CC_MM_CELL_PERIPHERY	GO_CC_MM_CELL_PERIPHERY	5/839	27/17799	0.00781755	0.0932008	0.0796638	NID1/SPRR1A/VCAM1/MYO1B/KRT17	5
GO_MF_MM_IDENTICAL_PROTEIN_BINDING	GO_MF_MM_IDENTICAL_PROTEIN_BINDING	25/839	316/17799	0.00814954	0.0961417	0.0821775	FHL2/P2RX2/PRC1/E2F8/TNF/LCP1/RAD51/APAF1/HOOK1/TRIP13/PCSK9/CLDN2/MCM6/C1QTNF6/GPSM2/NME1/CLDN4/CDA/S100B/BAX/BAK1/CAD/PCNA/EGFR/AKT1	25
GO_BP_MM_CELLULAR_RESPONSE_TO_ORGANIC_CYCLIC_COMPOUND	GO_BP_MM_CELLULAR_RESPONSE_TO_ORGANIC_CYCLIC_COMPOUND	6/839	38/17799	0.00817862	0.0961417	0.0821775	CCL2/CCNB1/TNF/CCL5/LGALS1/CYBA	6
GO_BP_MM_RESPONSE_TO_TOXIN	GO_BP_MM_RESPONSE_TO_TOXIN	9/839	75/17799	0.00852719	0.0995431	0.0850849	CCNB1/ASNS/SCN8A/CDK1/LCN2/NUPR1/CCL5/BAX/TGFBR1	9
GO_BP_MM_ANGIOGENESIS	GO_BP_MM_ANGIOGENESIS	16/839	175/17799	0.00868598	0.100326	0.0857542	CCL2/PLAU/ADAM8/VASH1/TNFAIP2/SERPINE1/ITGAV/HMOX1/ELK3/COL4A2/CTGF/MYH9/TGFBR1/ANXA2/MMP14/COL4A1	16
GO_BP_MM_AMINO_ACID_TRANSMEMBRANE_TRANSPORT	GO_BP_MM_AMINO_ACID_TRANSMEMBRANE_TRANSPORT	4/839	18/17799	0.008833	0.100326	0.0857542	SLC7A5/SLC7A2/SLC7A6/SLC7A1	4
GO_BP_MM_POSITIVE_REGULATION_OF_CALCIUM_ION_TRANSPORT	GO_BP_MM_POSITIVE_REGULATION_OF_CALCIUM_ION_TRANSPORT	4/839	18/17799	0.008833	0.100326	0.0857542	JAK3/CCL5/ORAI1/TSPO	4
GO_BP_MM_RESPONSE_TO_COPPER_ION	GO_BP_MM_RESPONSE_TO_COPPER_ION	4/839	18/17799	0.008833	0.100326	0.0857542	CDK1/PAM/TFRC/ICAM1	4
GO_BP_MM_POSITIVE_REGULATION_OF_INFLAMMATORY_RESPONSE	GO_BP_MM_POSITIVE_REGULATION_OF_INFLAMMATORY_RESPONSE	5/839	28/17799	0.00915527	0.101921	0.0871171	ADAM8/SERPINE1/ACE/STAT5A/CX3CL1	5
GO_BP_MM_RESPONSE_TO_PROGESTERONE_STIMULUS	GO_BP_MM_RESPONSE_TO_PROGESTERONE_STIMULUS	5/839	28/17799	0.00915527	0.101921	0.0871171	CCL2/CCNE1/CD38/CLDN4/TSPO	5
GO_CC_MM_RECYCLING_ENDOSOME_MEMBRANE	GO_CC_MM_RECYCLING_ENDOSOME_MEMBRANE	5/839	28/17799	0.00915527	0.101921	0.0871171	TFRC/RAB11FIP5/RAP2B/EHD1/EHD4	5
GO_BP_MM_CELLULAR_RESPONSE_TO_TUMOR_NECROSIS_FACTOR	GO_BP_MM_CELLULAR_RESPONSE_TO_TUMOR_NECROSIS_FACTOR	6/839	39/17799	0.00928941	0.102734	0.0878119	CCL2/LCN2/CCL5/CYBA/ICAM1/ANKRD1	6
GO_BP_MM_INTRINSIC_APOPTOTIC_SIGNALING_PATHWAY_IN_RESPONSE_TO_ENDOPLASMIC_RETICULUM_STRESS	GO_BP_MM_INTRINSIC_APOPTOTIC_SIGNALING_PATHWAY_IN_RESPONSE_TO_ENDOPLASMIC_RETICULUM_STRESS	3/839	10/17799	0.00976257	0.103213	0.0882219	BAX/BAK1/DNAJC10	3
GO_BP_MM_POSITIVE_REGULATION_OF_CELLULAR_PROTEIN_METABOLIC_PROCESS	GO_BP_MM_POSITIVE_REGULATION_OF_CELLULAR_PROTEIN_METABOLIC_PROCESS	3/839	10/17799	0.00976257	0.103213	0.0882219	UHRF1/CSF1/AKT1	3
GO_BP_MM_PROTEIN_PALMITOYLATION	GO_BP_MM_PROTEIN_PALMITOYLATION	3/839	10/17799	0.00976257	0.103213	0.0882219	ZDHHC2/ZDHHC15/ZDHHC21	3
GO_BP_MM_RESPONSE_TO_UV-C	GO_BP_MM_RESPONSE_TO_UV-C	3/839	10/17799	0.00976257	0.103213	0.0882219	PLSCR1/BAK1/DCUN1D3	3
GO_BP_MM_SISTER_CHROMATID_COHESION	GO_BP_MM_SISTER_CHROMATID_COHESION	3/839	10/17799	0.00976257	0.103213	0.0882219	SMC2/MRE11A/SMC4	3
GO_MF_MM_LOW-DENSITY_LIPOPROTEIN_RECEPTOR_ACTIVITY	GO_MF_MM_LOW-DENSITY_LIPOPROTEIN_RECEPTOR_ACTIVITY	3/839	10/17799	0.00976257	0.103213	0.0882219	LRP8/OLR1/CXCL16	3
GO_MF_MM_SNORNA_BINDING	GO_MF_MM_SNORNA_BINDING	3/839	10/17799	0.00976257	0.103213	0.0882219	NHP2/NOP56/GAR1	3
GO_MF_MM_RECEPTOR_BINDING	GO_MF_MM_RECEPTOR_BINDING	22/839	272/17799	0.00985522	0.103541	0.0885024	WNT10A/FGB/WNT7A/SERPINE2/MSN/SERPINE1/LAMA3/WNT7B/LIF/RND1/EFNB2/ANGPTL4/LDLRAP1/S100B/ARTN/SLC39A1/IDE/PFN1/BDNF/ITGB6/VTCN1/LBP	22
GO_CC_MM_NUCLEOPLASM	GO_CC_MM_NUCLEOPLASM	26/839	338/17799	0.00998837	0.104138	0.0890126	BHLHE41/MYBL2/HIST1H4I/TOP2A/DSCC1/CDK1/BLM/E2F1/CHEK1/2410016O06RIK/DUSP4/TOP3A/MRE11A/RAD51/AEN/WDHD1/ANKRD28/CHAF1B/KIF20B/SYCE2/LMNB1/MED8/WDR12/AKT1/CIB1/ITPR3	26
GO_CC_MM_CHROMATIN	GO_CC_MM_CHROMATIN	9/839	77/17799	0.0100821	0.104138	0.0890126	RAD18/ESCO2/KIF22/DSCC1/ASF1B/CHEK1/SUV39H2/MCM2/FANCC	9
GO_BP_MM_POSITIVE_REGULATION_OF_PEPTIDYL-TYROSINE_PHOSPHORYLATION	GO_BP_MM_POSITIVE_REGULATION_OF_PEPTIDYL-TYROSINE_PHOSPHORYLATION	8/839	64/17799	0.0100979	0.104138	0.0890126	LRP8/CD44/PDGFB/LIF/EFNA5/KITL/EHD4/MIF	8
GO_BP_MM_POSITIVE_REGULATION_OF_SMOOTH_MUSCLE_CELL_PROLIFERATION	GO_BP_MM_POSITIVE_REGULATION_OF_SMOOTH_MUSCLE_CELL_PROLIFERATION	6/839	40/17799	0.0105038	0.107011	0.0914684	PTGS2/PDGFB/TNF/CCL5/HMOX1/CX3CL1	6
GO_CC_MM_NUCLEAR_PORE	GO_CC_MM_NUCLEAR_PORE	6/839	40/17799	0.0105038	0.107011	0.0914684	NUP93/MAD2L1/AAAS/LBR/NUP210/EIF5A	6
GO_BP_MM_ACUTE-PHASE_RESPONSE	GO_BP_MM_ACUTE-PHASE_RESPONSE	5/839	29/17799	0.0106427	0.107773	0.0921198	IL1RN/SERPINA1B/TFRC/PLSCR1/LBP	5
GO_BP_MM_CELLULAR_RESPONSE_TO_EXTRACELLULAR_STIMULUS	GO_BP_MM_CELLULAR_RESPONSE_TO_EXTRACELLULAR_STIMULUS	4/839	19/17799	0.0107783	0.107847	0.0921827	AXL/CDKN2B/GSDMD/LDHA	4
GO_MF_MM_GROWTH_FACTOR_BINDING	GO_MF_MM_GROWTH_FACTOR_BINDING	4/839	19/17799	0.0107783	0.107847	0.0921827	LTBP1/FLT4/TGFBR1/OSMR	4
GO_MF_MM_LIGASE_ACTIVITY	GO_MF_MM_LIGASE_ACTIVITY	8/839	66/17799	0.0120741	0.114236	0.0976438	RAD18/UHRF1/UCHL1/NEURL1A/PCX/NEURL1B/LIG4/RNF217	8
GO_BP_MM_POSITIVE_REGULATION_OF_CELL_MIGRATION	GO_BP_MM_POSITIVE_REGULATION_OF_CELL_MIGRATION	11/839	107/17799	0.012079	0.114236	0.0976438	PDGFB/ITGAV/CSF1/CCL5/ETS1/THBS1/CXCL16/LAMB1/CX3CL1/EGFR/CXCL10	11
GO_BP_MM_DOUBLE-STRAND_BREAK_REPAIR_VIA_HOMOLOGOUS_RECOMBINATION	GO_BP_MM_DOUBLE-STRAND_BREAK_REPAIR_VIA_HOMOLOGOUS_RECOMBINATION	5/839	30/17799	0.0122871	0.114236	0.0976438	BRCA1/MMS22L/RAD51/RAD54L/SMC5	5
GO_BP_MM_GLUTATHIONE_METABOLIC_PROCESS	GO_BP_MM_GLUTATHIONE_METABOLIC_PROCESS	5/839	30/17799	0.0122871	0.114236	0.0976438	BC021614/GPX3/GSTA4/GSR/GCLC	5
GO_BP_MM_NEUTROPHIL_CHEMOTAXIS	GO_BP_MM_NEUTROPHIL_CHEMOTAXIS	5/839	30/17799	0.0122871	0.114236	0.0976438	CXCL3/CCL2/CXCL2/CX3CL1/CXCL1	5
GO_BP_MM_POSITIVE_REGULATION_OF_TUMOR_NECROSIS_FACTOR_PRODUCTION	GO_BP_MM_POSITIVE_REGULATION_OF_TUMOR_NECROSIS_FACTOR_PRODUCTION	5/839	30/17799	0.0122871	0.114236	0.0976438	CD14/TIRAP/IL23A/LBP/RIPK1	5
GO_BP_MM_NEGATIVE_REGULATION_OF_INTERLEUKIN-12_PRODUCTION	GO_BP_MM_NEGATIVE_REGULATION_OF_INTERLEUKIN-12_PRODUCTION	3/839	11/17799	0.0129587	0.114236	0.0976438	JAK3/ACP5/THBS1	3
GO_BP_MM_NUCLEOSIDE_DIPHOSPHATE_PHOSPHORYLATION	GO_BP_MM_NUCLEOSIDE_DIPHOSPHATE_PHOSPHORYLATION	3/839	11/17799	0.0129587	0.114236	0.0976438	NME1/NME2/RP2H	3
GO_BP_MM_POSITIVE_REGULATION_OF_MEMBRANE_PROTEIN_ECTODOMAIN_PROTEOLYSIS	GO_BP_MM_POSITIVE_REGULATION_OF_MEMBRANE_PROTEIN_ECTODOMAIN_PROTEOLYSIS	3/839	11/17799	0.0129587	0.114236	0.0976438	ADAM8/TNFRSF1B/TNF	3
GO_BP_MM_POSITIVE_REGULATION_OF_PROTEIN_AUTOPHOSPHORYLATION	GO_BP_MM_POSITIVE_REGULATION_OF_PROTEIN_AUTOPHOSPHORYLATION	3/839	11/17799	0.0129587	0.114236	0.0976438	PDGFB/MRE11A/RAP2B	3
GO_BP_MM_REGULATION_OF_CELL-CELL_ADHESION	GO_BP_MM_REGULATION_OF_CELL-CELL_ADHESION	3/839	11/17799	0.0129587	0.114236	0.0976438	ADAM8/NRARP/EFNA5	3
GO_BP_MM_REGULATION_OF_MITOCHONDRIAL_MEMBRANE_PERMEABILITY	GO_BP_MM_REGULATION_OF_MITOCHONDRIAL_MEMBRANE_PERMEABILITY	3/839	11/17799	0.0129587	0.114236	0.0976438	BAX/BAK1/PMAIP1	3
GO_BP_MM_RESPONSE_TO_MOLECULE_OF_BACTERIAL_ORIGIN	GO_BP_MM_RESPONSE_TO_MOLECULE_OF_BACTERIAL_ORIGIN	3/839	11/17799	0.0129587	0.114236	0.0976438	CXCL2/CD14/TNFAIP3	3
GO_BP_MM_UTP_BIOSYNTHETIC_PROCESS	GO_BP_MM_UTP_BIOSYNTHETIC_PROCESS	3/839	11/17799	0.0129587	0.114236	0.0976438	NME1/NME2/RP2H	3
GO_BP_MM_VAGINA_DEVELOPMENT	GO_BP_MM_VAGINA_DEVELOPMENT	3/839	11/17799	0.0129587	0.114236	0.0976438	AXL/BAX/BAK1	3
GO_BP_MM_VENTRICULAR_CARDIAC_MUSCLE_CELL_DEVELOPMENT	GO_BP_MM_VENTRICULAR_CARDIAC_MUSCLE_CELL_DEVELOPMENT	3/839	11/17799	0.0129587	0.114236	0.0976438	FHL2/CCNB1/CDK1	3
GO_CC_MM_NUCLEAR_ENVELOPE_LUMEN	GO_CC_MM_NUCLEAR_ENVELOPE_LUMEN	3/839	11/17799	0.0129587	0.114236	0.0976438	TUBB5/TUBB4B/IGF2R	3
GO_CC_MM_SPINDLE_MIDZONE	GO_CC_MM_SPINDLE_MIDZONE	3/839	11/17799	0.0129587	0.114236	0.0976438	PLK1/RACGAP1/CDC6	3
GO_MF_MM_NUCLEOSIDE_DIPHOSPHATE_KINASE_ACTIVITY	GO_MF_MM_NUCLEOSIDE_DIPHOSPHATE_KINASE_ACTIVITY	3/839	11/17799	0.0129587	0.114236	0.0976438	NME1/NME2/RP2H	3
GO_BP_MM_ACTIVATION_OF_PROTEIN_KINASE_ACTIVITY	GO_BP_MM_ACTIVATION_OF_PROTEIN_KINASE_ACTIVITY	4/839	20/17799	0.0129798	0.114236	0.0976438	CLSPN/ECT2/PDGFB/TPX2	4
GO_BP_MM_LEUKOCYTE_MIGRATION	GO_BP_MM_LEUKOCYTE_MIGRATION	4/839	20/17799	0.0129798	0.114236	0.0976438	MADCAM1/MSN/TNF/ICAM1	4
GO_BP_MM_MICROTUBULE-BASED_PROCESS	GO_BP_MM_MICROTUBULE-BASED_PROCESS	4/839	20/17799	0.0129798	0.114236	0.0976438	DYNLL1/TUBB5/TUBG1/TUBB4B	4
GO_MF_MM_AMINO_ACID_TRANSMEMBRANE_TRANSPORTER_ACTIVITY	GO_MF_MM_AMINO_ACID_TRANSMEMBRANE_TRANSPORTER_ACTIVITY	4/839	20/17799	0.0129798	0.114236	0.0976438	SLC7A5/SLC7A2/SLC7A6/SLC7A1	4
GO_BP_MM_ACTIVATION_OF_CYSTEINE-TYPE_ENDOPEPTIDASE_ACTIVITY_INVOLVED_IN_APOPTOTIC_PROCESS	GO_BP_MM_ACTIVATION_OF_CYSTEINE-TYPE_ENDOPEPTIDASE_ACTIVITY_INVOLVED_IN_APOPTOTIC_PROCESS	8/839	67/17799	0.0131624	0.11524	0.0985019	TNF/BOK/APAF1/EGLN3/SLC11A2/BAX/BAK1/PMAIP1	8
GO_BP_MM_BONE_DEVELOPMENT	GO_BP_MM_BONE_DEVELOPMENT	4/839	21/17799	0.0154482	0.132492	0.113248	SULF2/SH3PXD2B/HSD17B2/WHSC1	4
GO_BP_MM_OSTEOCLAST_DIFFERENTIATION	GO_BP_MM_OSTEOCLAST_DIFFERENTIATION	4/839	21/17799	0.0154482	0.132492	0.113248	TNF/CSF1/TNFRSF11A/TFRC	4
GO_BP_MM_SPINDLE_ASSEMBLY	GO_BP_MM_SPINDLE_ASSEMBLY	4/839	21/17799	0.0154482	0.132492	0.113248	TUBB5/HAUS4/RCC1/TUBB4B	4
GO_CC_MM_FILAMENTOUS_ACTIN	GO_CC_MM_FILAMENTOUS_ACTIN	4/839	21/17799	0.0154482	0.132492	0.113248	BRCA1/TPM4/TPM1/CD2AP	4
GO_MF_MM_GROWTH_FACTOR_ACTIVITY	GO_MF_MM_GROWTH_FACTOR_ACTIVITY	13/839	141/17799	0.0159044	0.13417	0.114683	CSF2/PDGFB/IL34/CSF3/LIF/CSF1/KITL/INHBB/CTGF/ARTN/GFER/CXCL1/BDNF	13
GO_BP_MM_PROTEIN_UBIQUITINATION	GO_BP_MM_PROTEIN_UBIQUITINATION	21/839	268/17799	0.0159564	0.13417	0.114683	RAD18/UBE2C/PLK1/UHRF1/CDCA3/NEURL1A/CDC20/FBXO2/SOCS2/NEURL1B/SPOPL/TRIM59/SPSB1/UBD/DCAF15/MED8/ASB6/WSB2/KLHL21/AKT1/RNF217	21
GO_BP_MM_CELLULAR_RESPONSE_TO_ORGANIC_SUBSTANCE	GO_BP_MM_CELLULAR_RESPONSE_TO_ORGANIC_SUBSTANCE	5/839	32/17799	0.0160743	0.13417	0.114683	IQGAP3/CHEK1/CYBA/BAX/ICAM1	5
GO_BP_MM_LEARNING_OR_MEMORY	GO_BP_MM_LEARNING_OR_MEMORY	5/839	32/17799	0.0160743	0.13417	0.114683	CNR1/SLC11A2/S100B/LAMB1/BDNF	5
GO_BP_MM_RESPONSE_TO_ACTIVITY	GO_BP_MM_RESPONSE_TO_ACTIVITY	5/839	32/17799	0.0160743	0.13417	0.114683	CCL2/CDK1/TNF/MAS1/CCL5	5
GO_BP_MM_DEFENSE_RESPONSE_TO_GRAM-POSITIVE_BACTERIUM	GO_BP_MM_DEFENSE_RESPONSE_TO_GRAM-POSITIVE_BACTERIUM	6/839	44/17799	0.0164911	0.13417	0.114683	MMP7/PGLYRP1/TNF/ACP5/TIRAP/LBP	6
GO_CC_MM_FILOPODIUM	GO_CC_MM_FILOPODIUM	6/839	44/17799	0.0164911	0.13417	0.114683	MSN/VCAM1/MYO1B/ARL4C/TWF1/CIB1	6
GO_BP_MM_EMBRYO_DEVELOPMENT	GO_BP_MM_EMBRYO_DEVELOPMENT	11/839	112/17799	0.0165858	0.13417	0.114683	FOXM1/MADCAM1/BIRC5/RACGAP1/FOXQ1/TIMELESS/TPM1/FOXN2/TGFBR1/CAD/FOXA3	11
GO_BP_MM_DNA-DEPENDENT_DNA_REPLICATION	GO_BP_MM_DNA-DEPENDENT_DNA_REPLICATION	3/839	12/17799	0.0166815	0.13417	0.114683	TOP2A/POLE2/BAZ1A	3
GO_BP_MM_GTP_BIOSYNTHETIC_PROCESS	GO_BP_MM_GTP_BIOSYNTHETIC_PROCESS	3/839	12/17799	0.0166815	0.13417	0.114683	NME1/NME2/RP2H	3
GO_BP_MM_LYMPH_VESSEL_DEVELOPMENT	GO_BP_MM_LYMPH_VESSEL_DEVELOPMENT	3/839	12/17799	0.0166815	0.13417	0.114683	HEG1/FLT4/EFNB2	3
GO_MF_MM_ANION_TRANSMEMBRANE_TRANSPORTER_ACTIVITY	GO_MF_MM_ANION_TRANSMEMBRANE_TRANSPORTER_ACTIVITY	3/839	12/17799	0.0166815	0.13417	0.114683	SLC4A11/SLC4A7/SLC4A4	3
GO_MF_MM_INORGANIC_ANION_EXCHANGER_ACTIVITY	GO_MF_MM_INORGANIC_ANION_EXCHANGER_ACTIVITY	3/839	12/17799	0.0166815	0.13417	0.114683	SLC4A11/SLC4A7/SLC4A4	3
GO_BP_MM_RELEASE_OF_CYTOCHROME_C_FROM_MITOCHONDRIA	GO_BP_MM_RELEASE_OF_CYTOCHROME_C_FROM_MITOCHONDRIA	4/839	22/17799	0.0181928	0.144365	0.123396	BAX/BAK1/PMAIP1/SFN	4
GO_CC_MM_SYNAPTONEMAL_COMPLEX	GO_CC_MM_SYNAPTONEMAL_COMPLEX	4/839	22/17799	0.0181928	0.144365	0.123396	TOP2A/INCENP/RAD51/SYCE2	4
GO_BP_MM_RESPONSE_TO_ESTROGEN_STIMULUS	GO_BP_MM_RESPONSE_TO_ESTROGEN_STIMULUS	8/839	71/17799	0.0182395	0.144365	0.123396	WNT7A/PDGFB/SERPINE1/CCL5/CAR2/HMOX1/TGFBR1/MMP14	8
GO_MF_MM_PHOSPHOPROTEIN_PHOSPHATASE_ACTIVITY	GO_MF_MM_PHOSPHOPROTEIN_PHOSPHATASE_ACTIVITY	6/839	45/17799	0.0182925	0.144365	0.123396	CDKN3/DLGAP5/CTDSPL2/PPM1H/PTPN12/SSU72	6
GO_BP_MM_GERM_CELL_DEVELOPMENT	GO_BP_MM_GERM_CELL_DEVELOPMENT	5/839	34/17799	0.0205672	0.158551	0.135522	FANCC/KITL/ASZ1/BAX/AKT1	5
GO_BP_MM_BEHAVIORAL_RESPONSE_TO_PAIN	GO_BP_MM_BEHAVIORAL_RESPONSE_TO_PAIN	3/839	13/17799	0.0209389	0.158551	0.135522	P2RX2/RUNX1/TSPO	3
GO_BP_MM_CELL_MOTILITY	GO_BP_MM_CELL_MOTILITY	3/839	13/17799	0.0209389	0.158551	0.135522	ETS1/TGFBR1/DST	3
GO_BP_MM_CELLULAR_RESPONSE_TO_FIBROBLAST_GROWTH_FACTOR_STIMULUS	GO_BP_MM_CELLULAR_RESPONSE_TO_FIBROBLAST_GROWTH_FACTOR_STIMULUS	3/839	13/17799	0.0209389	0.158551	0.135522	CCL2/CD44/CCL5	3
GO_BP_MM_HYDROGEN_PEROXIDE_CATABOLIC_PROCESS	GO_BP_MM_HYDROGEN_PEROXIDE_CATABOLIC_PROCESS	3/839	13/17799	0.0209389	0.158551	0.135522	GPX3/PXDN/TXNRD1	3
GO_BP_MM_POSITIVE_REGULATION_OF_NEUTROPHIL_CHEMOTAXIS	GO_BP_MM_POSITIVE_REGULATION_OF_NEUTROPHIL_CHEMOTAXIS	3/839	13/17799	0.0209389	0.158551	0.135522	XCL1/IL23A/LBP	3
GO_CC_MM_PHAGOCYTIC_CUP	GO_CC_MM_PHAGOCYTIC_CUP	3/839	13/17799	0.0209389	0.158551	0.135522	TNF/LCP1/PEAR1	3
GO_CC_MM_PRONUCLEUS	GO_CC_MM_PRONUCLEUS	3/839	13/17799	0.0209389	0.158551	0.135522	BLM/NCAPD2/CENPF	3
GO_MF_MM_MAP_KINASE_TYROSINE_SERINE_THREONINE_PHOSPHATASE_ACTIVITY	GO_MF_MM_MAP_KINASE_TYROSINE_SERINE_THREONINE_PHOSPHATASE_ACTIVITY	3/839	13/17799	0.0209389	0.158551	0.135522	DUSP9/DUSP4/DUSP7	3
GO_MF_MM_INSULIN-LIKE_GROWTH_FACTOR_BINDING	GO_MF_MM_INSULIN-LIKE_GROWTH_FACTOR_BINDING	4/839	23/17799	0.0212214	0.159969	0.136735	IGFBP4/IGFBP7/CTGF/IGF2R	4
GO_CC_MM_PROTEINACEOUS_EXTRACELLULAR_MATRIX	GO_CC_MM_PROTEINACEOUS_EXTRACELLULAR_MATRIX	16/839	194/17799	0.0214233	0.16077	0.137419	WNT10A/LTBP1/MMP7/NID1/WNT7A/TIMP1/POSTN/LCP1/WNT7B/LGALS3/PXDN/LGALS1/ANGPTL4/CTGF/LAMC2/LAMB1	16
GO_MF_MM_PROTEIN_TYROSINE_SERINE_THREONINE_PHOSPHATASE_ACTIVITY	GO_MF_MM_PROTEIN_TYROSINE_SERINE_THREONINE_PHOSPHATASE_ACTIVITY	6/839	47/17799	0.0222894	0.166527	0.142339	DUSP9/CDKN3/DUSP4/DUSP7/PTP4A3/RNGTT	6
GO_BP_MM_NEGATIVE_REGULATION_OF_NEURON_APOPTOTIC_PROCESS	GO_BP_MM_NEGATIVE_REGULATION_OF_NEURON_APOPTOTIC_PROCESS	9/839	88/17799	0.0226876	0.168752	0.144241	ADAM8/BIRC5/AXL/MT1/HMOX1/LIG4/BAX/BDNF/GCLC	9
GO_BP_MM_POSITIVE_REGULATION_OF_I-KAPPAB_KINASE_NF-KAPPAB_CASCADE	GO_BP_MM_POSITIVE_REGULATION_OF_I-KAPPAB_KINASE_NF-KAPPAB_CASCADE	11/839	118/17799	0.0235282	0.174233	0.148926	CD40/ECT2/TNF/ZDHHC13/HMOX1/LGALS1/TIRAP/S100B/GOLT1B/UBD/RIPK1	11
GO_BP_MM_REACTIVE_OXYGEN_SPECIES_METABOLIC_PROCESS	GO_BP_MM_REACTIVE_OXYGEN_SPECIES_METABOLIC_PROCESS	4/839	24/17799	0.0245407	0.180466	0.154254	PDGFB/DDIT4/CTGF/PMAIP1	4
GO_BP_MM_POSITIVE_REGULATION_OF_NF-KAPPAB_TRANSCRIPTION_FACTOR_ACTIVITY	GO_BP_MM_POSITIVE_REGULATION_OF_NF-KAPPAB_TRANSCRIPTION_FACTOR_ACTIVITY	8/839	75/17799	0.0245846	0.180466	0.154254	CD40/ADAM8/TNF/TNFRSF11A/TIRAP/ARHGEF2/ICAM1/RIPK1	8
GO_BP_MM_APOPTOTIC_MITOCHONDRIAL_CHANGES	GO_BP_MM_APOPTOTIC_MITOCHONDRIAL_CHANGES	3/839	14/17799	0.0257338	0.181525	0.15516	HK2/BAX/AKT1	3
GO_BP_MM_AXIS_SPECIFICATION	GO_BP_MM_AXIS_SPECIFICATION	3/839	14/17799	0.0257338	0.181525	0.15516	WNT10A/WNT7A/WNT7B	3
GO_BP_MM_FOCAL_ADHESION_ASSEMBLY	GO_BP_MM_FOCAL_ADHESION_ASSEMBLY	3/839	14/17799	0.0257338	0.181525	0.15516	ITGAV/PIP5K1A/ACTN1	3
GO_BP_MM_INTERMEDIATE_FILAMENT_ORGANIZATION	GO_BP_MM_INTERMEDIATE_FILAMENT_ORGANIZATION	3/839	14/17799	0.0257338	0.181525	0.15516	KRT20/KRT17/AGFG1	3
GO_BP_MM_PEPTIDYL-PROLINE_MODIFICATION	GO_BP_MM_PEPTIDYL-PROLINE_MODIFICATION	3/839	14/17799	0.0257338	0.181525	0.15516	FKBP5/FKBP14/FKBP10	3
GO_BP_MM_POSITIVE_REGULATION_OF_BONE_RESORPTION	GO_BP_MM_POSITIVE_REGULATION_OF_BONE_RESORPTION	3/839	14/17799	0.0257338	0.181525	0.15516	ADAM8/CAR2/TFRC	3
GO_BP_MM_REGULATION_OF_PROTEIN_BINDING	GO_BP_MM_REGULATION_OF_PROTEIN_BINDING	3/839	14/17799	0.0257338	0.181525	0.15516	PLK1/LDLRAP1/TGFBR1	3
GO_CC_MM_MICROVILLUS_MEMBRANE	GO_CC_MM_MICROVILLUS_MEMBRANE	3/839	14/17799	0.0257338	0.181525	0.15516	MSN/MUC20/CAR9	3
GO_MF_MM_DNA_HELICASE_ACTIVITY	GO_MF_MM_DNA_HELICASE_ACTIVITY	3/839	14/17799	0.0257338	0.181525	0.15516	MCM6/MCM4/MCM7	3
GO_MF_MM_PEPTIDYL-PROLYL_CIS-TRANS_ISOMERASE_ACTIVITY	GO_MF_MM_PEPTIDYL-PROLYL_CIS-TRANS_ISOMERASE_ACTIVITY	5/839	36/17799	0.0258088	0.181525	0.15516	PPIC/FKBP5/FKBP14/FKBP10/PPIL1	5
GO_BP_MM_RESPONSE_TO_MECHANICAL_STIMULUS	GO_BP_MM_RESPONSE_TO_MECHANICAL_STIMULUS	6/839	49/17799	0.0268358	0.187182	0.159995	CCL2/CCNB1/ASNS/TNF/ETS1/MMP14	6
GO_MF_MM_HISTONE_BINDING	GO_MF_MM_HISTONE_BINDING	6/839	49/17799	0.0268358	0.187182	0.159995	UHRF1/ASF1B/MCM2/DEK/RCC1/IPO9	6
GO_BP_MM_CELLULAR_RESPONSE_TO_STARVATION	GO_BP_MM_CELLULAR_RESPONSE_TO_STARVATION	4/839	25/17799	0.028156	0.194775	0.166485	PCSK9/INHBB/ANGPTL4/FOXA3	4
GO_BP_MM_POSITIVE_REGULATION_OF_VASOCONSTRICTION	GO_BP_MM_POSITIVE_REGULATION_OF_VASOCONSTRICTION	4/839	25/17799	0.028156	0.194775	0.166485	PTGS2/PDGFB/CD38/ICAM1	4
GO_BP_MM_PROTEIN_AUTOPHOSPHORYLATION	GO_BP_MM_PROTEIN_AUTOPHOSPHORYLATION	12/839	137/17799	0.0285499	0.195887	0.167435	MELK/JAK3/NEK2/PASK/FLT4/CAMKK2/TGFBR1/SLK/EGFR/SIK1/EIF2S1/RIPK1	12
GO_BP_MM_RESPONSE_TO_STRESS	GO_BP_MM_RESPONSE_TO_STRESS	12/839	137/17799	0.0285499	0.195887	0.167435	CNR1/MAPK11/UCHL1/HSD11B2/TACC3/ADM/CAR2/AHR/CD14/SMPD3/HSF2BP/TSPO	12
GO_BP_MM_INNATE_IMMUNE_RESPONSE	GO_BP_MM_INNATE_IMMUNE_RESPONSE	11/839	122/17799	0.0292038	0.199559	0.170574	JAK3/PGLYRP1/AXL/LCN2/IL34/CSF1/CD14/IL23A/CYBA/LBP/MIF	11
GO_BP_MM_DNA_RECOMBINATION	GO_BP_MM_DNA_RECOMBINATION	8/839	78/17799	0.0302571	0.20592	0.176011	EXO1/SMC2/BLM/RAD51AP1/FIGNL1/LIG4/LIG1/SMC4	8
GO_BP_MM_CELLULAR_COMPONENT_ORGANIZATION	GO_BP_MM_CELLULAR_COMPONENT_ORGANIZATION	3/839	15/17799	0.031065	0.206404	0.176425	FMNL3/INF2/FHOD1	3
GO_BP_MM_NEGATIVE_REGULATION_OF_PROTEOLYSIS	GO_BP_MM_NEGATIVE_REGULATION_OF_PROTEOLYSIS	3/839	15/17799	0.031065	0.206404	0.176425	PLAT/SERPINE2/IDE	3
GO_BP_MM_NUCLEOTIDE_BIOSYNTHETIC_PROCESS	GO_BP_MM_NUCLEOTIDE_BIOSYNTHETIC_PROCESS	3/839	15/17799	0.031065	0.206404	0.176425	TK1/DHFR/DCK	3
GO_BP_MM_OOCYTE_MATURATION	GO_BP_MM_OOCYTE_MATURATION	3/839	15/17799	0.031065	0.206404	0.176425	CCNB1/TRIP13/CDC25B	3
GO_BP_MM_REGULATION_OF_NEURON_APOPTOTIC_PROCESS	GO_BP_MM_REGULATION_OF_NEURON_APOPTOTIC_PROCESS	3/839	15/17799	0.031065	0.206404	0.176425	EGLN3/BAX/BDNF	3
GO_MF_MM_FK506_BINDING	GO_MF_MM_FK506_BINDING	3/839	15/17799	0.031065	0.206404	0.176425	FKBP5/FKBP14/FKBP10	3
GO_BP_MM_PROTEIN_OLIGOMERIZATION	GO_BP_MM_PROTEIN_OLIGOMERIZATION	5/839	38/17799	0.0318342	0.208154	0.177921	RRM2/BLM/C1QTNF6/RRM1/BAX	5
GO_MF_MM_DNA_BINDING_BENDING	GO_MF_MM_DNA_BINDING_BENDING	6/839	51/17799	0.0319572	0.208154	0.177921	FOXM1/FOXQ1/HMGB2/FOXN2/FOXA3/CRIP1	6
GO_BP_MM_CELLULAR_RESPONSE_TO_HYDROGEN_PEROXIDE	GO_BP_MM_CELLULAR_RESPONSE_TO_HYDROGEN_PEROXIDE	4/839	26/17799	0.0320713	0.208154	0.177921	ECT2/CDK1/LCN2/ETS1	4
GO_BP_MM_HAIR_FOLLICLE_MORPHOGENESIS	GO_BP_MM_HAIR_FOLLICLE_MORPHOGENESIS	4/839	26/17799	0.0320713	0.208154	0.177921	FST/WNT10A/FOXQ1/RUNX1	4
GO_CC_MM_SIGNALOSOME	GO_CC_MM_SIGNALOSOME	4/839	26/17799	0.0320713	0.208154	0.177921	BASP1/DYNLL1/MYH9/EPB4.1L2	4
GO_MF_MM_RIBOSOME_BINDING	GO_MF_MM_RIBOSOME_BINDING	4/839	26/17799	0.0320713	0.208154	0.177921	EIF6/ERI1/EIF5A/EIF2S1	4
GO_BP_MM_HEMOPOIESIS	GO_BP_MM_HEMOPOIESIS	7/839	65/17799	0.0328098	0.212128	0.181317	MELK/CDK6/RUNX1/4632434I11RIK/TACC3/CNN2/CIAPIN1	7
GO_BP_MM_RESPONSE_TO_OXIDATIVE_STRESS	GO_BP_MM_RESPONSE_TO_OXIDATIVE_STRESS	10/839	109/17799	0.0329613	0.212291	0.181457	PTGS2/GPX8/LCN2/GPX3/PXDN/HMOX1/TPM4/MMP14/TXNRD1/GCLC	10
GO_CC_MM_NUCLEAR_MEMBRANE	GO_CC_MM_NUCLEAR_MEMBRANE	11/839	125/17799	0.0340602	0.218531	0.186791	DTL/NUP93/KAZN/RRP12/AAAS/NOC4L/RCC1/WHSC1/RANGAP1/NUP210/EGFR	11
GO_MF_MM_GTPASE_ACTIVITY	GO_MF_MM_GTPASE_ACTIVITY	19/839	256/17799	0.0343835	0.219345	0.187486	GEM/TUBD1/RND1/TUBB2B/TUBB5/ARL4C/TUBG1/RAP2B/TUBB6/RALB/EHD1/RAN/TUBB4B/RALA/EHD4/TUBA1B/EIF5B/EFTUD2/RAB31	19
GO_BP_MM_CELLULAR_RESPONSE_TO_MECHANICAL_STIMULUS	GO_BP_MM_CELLULAR_RESPONSE_TO_MECHANICAL_STIMULUS	6/839	52/17799	0.0347405	0.219345	0.187486	CD40/CHEK1/CNN2/CYBA/BAK1/ANKRD1	6
GO_BP_MM_PROTEIN_HOMOTETRAMERIZATION	GO_BP_MM_PROTEIN_HOMOTETRAMERIZATION	6/839	52/17799	0.0347405	0.219345	0.187486	TK1/GPX3/CDA/IDE/GLS/PPAT	6
GO_BP_MM_NUCLEOBASE-CONTAINING_COMPOUND_METABOLIC_PROCESS	GO_BP_MM_NUCLEOBASE-CONTAINING_COMPOUND_METABOLIC_PROCESS	5/839	39/17799	0.0351496	0.219345	0.187486	AK4/EXO1/BRIP1/POLE/DCK	5
GO_MF_MM_CALCIUM-DEPENDENT_PROTEIN_BINDING	GO_MF_MM_CALCIUM-DEPENDENT_PROTEIN_BINDING	5/839	39/17799	0.0351496	0.219345	0.187486	LRP8/S100A6/SYT8/S100B/CALM1	5
GO_BP_MM_LIPOPOLYSACCHARIDE-MEDIATED_SIGNALING_PATHWAY	GO_BP_MM_LIPOPOLYSACCHARIDE-MEDIATED_SIGNALING_PATHWAY	4/839	27/17799	0.0362894	0.219345	0.187486	CCL2/TNF/CCL5/LBP	4
GO_BP_MM_PLATELET_ACTIVATION	GO_BP_MM_PLATELET_ACTIVATION	4/839	27/17799	0.0362894	0.219345	0.187486	FGB/AXL/PF4/CX3CL1	4
GO_MF_MM_COFACTOR_BINDING	GO_MF_MM_COFACTOR_BINDING	4/839	27/17799	0.0362894	0.219345	0.187486	BIRC5/ASNS/TYMS/AHCY	4
GO_MF_MM_EXONUCLEASE_ACTIVITY	GO_MF_MM_EXONUCLEASE_ACTIVITY	4/839	27/17799	0.0362894	0.219345	0.187486	FEN1/MRE11A/AEN/ERI1	4
GO_BP_MM_APOPTOTIC_DNA_FRAGMENTATION	GO_BP_MM_APOPTOTIC_DNA_FRAGMENTATION	3/839	16/17799	0.0369271	0.219345	0.187486	FOXQ1/APAF1/BAX	3
GO_BP_MM_GENE_SILENCING_BY_RNA	GO_BP_MM_GENE_SILENCING_BY_RNA	3/839	16/17799	0.0369271	0.219345	0.187486	NCBP1/ASZ1/ERI1	3
GO_BP_MM_MATERNAL_PROCESS_INVOLVED_IN_FEMALE_PREGNANCY	GO_BP_MM_MATERNAL_PROCESS_INVOLVED_IN_FEMALE_PREGNANCY	3/839	16/17799	0.0369271	0.219345	0.187486	CNR1/LIF/PPAT	3
GO_BP_MM_MICROTUBULE_BUNDLE_FORMATION	GO_BP_MM_MICROTUBULE_BUNDLE_FORMATION	3/839	16/17799	0.0369271	0.219345	0.187486	PLK1/PSRC1/NAV1	3
GO_BP_MM_POSITIVE_REGULATION_OF_BLOOD_VESSEL_ENDOTHELIAL_CELL_MIGRATION	GO_BP_MM_POSITIVE_REGULATION_OF_BLOOD_VESSEL_ENDOTHELIAL_CELL_MIGRATION	3/839	16/17799	0.0369271	0.219345	0.187486	PDGFB/THBS1/AKT1	3
GO_BP_MM_POSITIVE_REGULATION_OF_ERYTHROCYTE_DIFFERENTIATION	GO_BP_MM_POSITIVE_REGULATION_OF_ERYTHROCYTE_DIFFERENTIATION	3/839	16/17799	0.0369271	0.219345	0.187486	ETS1/HMGB2/SMAP1	3
GO_BP_MM_RECIPROCAL_MEIOTIC_RECOMBINATION	GO_BP_MM_RECIPROCAL_MEIOTIC_RECOMBINATION	3/839	16/17799	0.0369271	0.219345	0.187486	TOPBP1/RAD51/TRIP13	3
GO_BP_MM_REGULATION_OF_PHOSPHORYLATION	GO_BP_MM_REGULATION_OF_PHOSPHORYLATION	3/839	16/17799	0.0369271	0.219345	0.187486	BARD1/MCM7/PPP1R14B	3
GO_BP_MM_SUPEROXIDE_METABOLIC_PROCESS	GO_BP_MM_SUPEROXIDE_METABOLIC_PROCESS	3/839	16/17799	0.0369271	0.219345	0.187486	NOXO1/SH3PXD2B/CYBA	3
GO_BP_MM_XENOBIOTIC_METABOLIC_PROCESS	GO_BP_MM_XENOBIOTIC_METABOLIC_PROCESS	3/839	16/17799	0.0369271	0.219345	0.187486	BC021614/GSTA4/AHR	3
GO_MF_MM_GAMMA-TUBULIN_BINDING	GO_MF_MM_GAMMA-TUBULIN_BINDING	3/839	16/17799	0.0369271	0.219345	0.187486	RACGAP1/RAB11FIP5/NME1	3
GO_MF_MM_LAMININ_BINDING	GO_MF_MM_LAMININ_BINDING	3/839	16/17799	0.0369271	0.219345	0.187486	THBS1/LGALS1/TINAGL1	3
GO_BP_MM_POSITIVE_REGULATION_OF_GTPASE_ACTIVITY	GO_BP_MM_POSITIVE_REGULATION_OF_GTPASE_ACTIVITY	6/839	53/17799	0.0376754	0.223001	0.190611	RGS4/RACGAP1/RGS5/RGS3/RP2H/RGS19	6
GO_BP_MM_TERMINATION_OF_G-PROTEIN_COUPLED_RECEPTOR_SIGNALING_PATHWAY	GO_BP_MM_TERMINATION_OF_G-PROTEIN_COUPLED_RECEPTOR_SIGNALING_PATHWAY	5/839	40/17799	0.0386705	0.226498	0.1936	RGS4/RGS5/RGS3/MYH9/RGS19	5
GO_MF_MM_GLYCOPROTEIN_BINDING	GO_MF_MM_GLYCOPROTEIN_BINDING	5/839	40/17799	0.0386705	0.226498	0.1936	LRP8/FBXO2/LGALS1/IDE/IGF2R	5
GO_MF_MM_NADP_BINDING	GO_MF_MM_NADP_BINDING	5/839	40/17799	0.0386705	0.226498	0.1936	DHFR/GSR/ME1/PGD/TXNRD1	5
GO_BP_MM_POSITIVE_REGULATION_OF_CELL_PROLIFERATION	GO_BP_MM_POSITIVE_REGULATION_OF_CELL_PROLIFERATION	23/839	329/17799	0.0389852	0.227161	0.194167	CSF2/FOXM1/PDGFB/MYCN/IL34/TNF/CDC20/ITGAV/WNT7B/LIF/CSF1/MAS1/FLT4/ETS1/ADM/CDCA7L/KITL/CTGF/TGFBR1/STAT5A/EGFR/EIF5A/OSMR	23
GO_MF_MM_STRUCTURAL_MOLECULE_ACTIVITY	GO_MF_MM_STRUCTURAL_MOLECULE_ACTIVITY	14/839	176/17799	0.0390538	0.227161	0.194167	KRT20/IVL/TUBD1/CLDN2/TUBB2B/CLDN4/COL4A6/LMNB1/KRT17/TUBB6/KRT7/TUBB4B/EPB4.1L2/VCL	14
GO_MF_MM_OXIDOREDUCTASE_ACTIVITY_ACTING_ON_THE_CH-OH_GROUP_OF_DONORS_NAD_OR_NADP_AS_ACCEPTOR	GO_MF_MM_OXIDOREDUCTASE_ACTIVITY_ACTING_ON_THE_CH-OH_GROUP_OF_DONORS_NAD_OR_NADP_AS_ACCEPTOR	6/839	54/17799	0.0407639	0.234145	0.200137	LDHA/AHCY/GALE/ME1/ME2/NMRAL1	6
GO_BP_MM_KERATINIZATION	GO_BP_MM_KERATINIZATION	4/839	28/17799	0.0408117	0.234145	0.200137	SPRR1A/IVL/KAZN/KRT17	4
GO_BP_MM_POSITIVE_REGULATION_OF_PHOSPHORYLATION	GO_BP_MM_POSITIVE_REGULATION_OF_PHOSPHORYLATION	4/839	28/17799	0.0408117	0.234145	0.200137	CCL5/THBS1/EGFR/RIPK1	4
GO_CC_MM_LATERAL_PLASMA_MEMBRANE	GO_CC_MM_LATERAL_PLASMA_MEMBRANE	4/839	28/17799	0.0408117	0.234145	0.200137	IQGAP3/TACSTD2/VANGL2/CLDN4	4
GO_BP_MM_RESPONSE_TO_ETHANOL	GO_BP_MM_RESPONSE_TO_ETHANOL	9/839	98/17799	0.0415085	0.237034	0.202606	CCL2/CNR1/CDK1/CCNE1/BAK1/STAT5A/GSN/AACS/ICAM1	9
GO_CC_MM_APICAL_PART_OF_CELL	GO_CC_MM_APICAL_PART_OF_CELL	8/839	83/17799	0.0415973	0.237034	0.202606	PLAT/VASH1/MSN/VCAM1/CAR2/SLC11A2/GPSM2/TUBG1	8
GO_MF_MM_GTP_BINDING	GO_MF_MM_GTP_BINDING	25/839	367/17799	0.0421011	0.239095	0.204367	AK4/GEM/TUBD1/RND1/TUBB2B/TUBB5/ARL4C/TUBG1/DOCK5/NME1/RAP2B/TUBB6/NIN/RALB/EHD1/RP2H/RAN/TUBB4B/RNGTT/RALA/EHD4/TUBA1B/EIF5B/EFTUD2/RAB31	25
GO_BP_MM_DOUBLE-STRAND_BREAK_REPAIR	GO_BP_MM_DOUBLE-STRAND_BREAK_REPAIR	5/839	41/17799	0.0423988	0.239974	0.205119	CDCA5/MRE11A/RAD54L/TRIP13/LIG4	5
GO_CC_MM_FOCAL_ADHESION	GO_CC_MM_FOCAL_ADHESION	10/839	114/17799	0.0428226	0.240288	0.205387	FHL2/BRCA1/KIF22/MSN/BSPRY/PDLIM7/LIG4/FBLIM1/VCL/ACTN1	10
GO_BP_MM_POSITIVE_REGULATION_OF_ACTIVATED_T_CELL_PROLIFERATION	GO_BP_MM_POSITIVE_REGULATION_OF_ACTIVATED_T_CELL_PROLIFERATION	3/839	17/17799	0.0433118	0.240288	0.205387	JAK3/IL23A/STAT5A	3
GO_BP_MM_POSITIVE_REGULATION_OF_INTERLEUKIN-10_PRODUCTION	GO_BP_MM_POSITIVE_REGULATION_OF_INTERLEUKIN-10_PRODUCTION	3/839	17/17799	0.0433118	0.240288	0.205387	XCL1/CD83/IL23A	3
GO_BP_MM_POSITIVE_REGULATION_OF_REACTIVE_OXYGEN_SPECIES_METABOLIC_PROCESS	GO_BP_MM_POSITIVE_REGULATION_OF_REACTIVE_OXYGEN_SPECIES_METABOLIC_PROCESS	3/839	17/17799	0.0433118	0.240288	0.205387	PDGFB/THBS1/TSPO	3
GO_BP_MM_RETINOL_METABOLIC_PROCESS	GO_BP_MM_RETINOL_METABOLIC_PROCESS	3/839	17/17799	0.0433118	0.240288	0.205387	BCMO1/RBP1/RDH10	3
GO_MF_MM_EXTRACELLULAR_MATRIX_BINDING	GO_MF_MM_EXTRACELLULAR_MATRIX_BINDING	3/839	17/17799	0.0433118	0.240288	0.205387	NID1/FBLN2/THBS1	3
GO_CC_MM_EXTERNAL_SIDE_OF_PLASMA_MEMBRANE	GO_CC_MM_EXTERNAL_SIDE_OF_PLASMA_MEMBRANE	16/839	213/17799	0.0449574	0.248597	0.212489	CD40/FGB/CD44/HEG1/VCAM1/TNF/CD83/ITGAV/TNFRSF11A/THBS1/TFRC/ACE/MCAM/SCNN1A/ICAM1/CXCL10	16
GO_CC_MM_BASAL_PLASMA_MEMBRANE	GO_CC_MM_BASAL_PLASMA_MEMBRANE	4/839	29/17799	0.0456388	0.249087	0.212908	TACSTD2/MUC20/CLDN4/LDLRAP1	4
GO_CC_MM_CELL_LEADING_EDGE	GO_CC_MM_CELL_LEADING_EDGE	4/839	29/17799	0.0456388	0.249087	0.212908	BSPRY/TUBG1/MYH9/DST	4
GO_CC_MM_CYTOPLASMIC_MICROTUBULE	GO_CC_MM_CYTOPLASMIC_MICROTUBULE	4/839	29/17799	0.0456388	0.249087	0.212908	BIRC5/CKAP2/TUBG1/TUBA1B	4
GO_MF_MM_CELL_ADHESION_MOLECULE_BINDING	GO_MF_MM_CELL_ADHESION_MOLECULE_BINDING	4/839	29/17799	0.0456388	0.249087	0.212908	ADAM8/CPE/MSN/VCAM1	4
GO_CC_MM_CELL_CORTEX	GO_CC_MM_CELL_CORTEX	9/839	100/17799	0.0462515	0.250453	0.214076	MELK/FGB/GPSM2/FBLIM1/CTGF/MYH9/ACTR2/LAMC2/CD2AP	9
GO_MF_MM_PHOSPHATIDYLINOSITOL_BINDING	GO_MF_MM_PHOSPHATIDYLINOSITOL_BINDING	7/839	70/17799	0.0463174	0.250453	0.214076	P2RX2/PASK/NOXO1/SH3PXD2B/PXDC1/SNX7/ITPR3	7
GO_BP_MM_POSITIVE_REGULATION_OF_PEPTIDYL-SERINE_PHOSPHORYLATION	GO_BP_MM_POSITIVE_REGULATION_OF_PEPTIDYL-SERINE_PHOSPHORYLATION	5/839	42/17799	0.0463361	0.250453	0.214076	CD44/TNF/LIF/AKT1/MIF	5
GO_MF_MM_CYTOKINE_ACTIVITY	GO_MF_MM_CYTOKINE_ACTIVITY	13/839	164/17799	0.0466445	0.251312	0.21481	CSF2/CCL20/WNT7A/PGLYRP1/IL34/CSF3/TNF/LIF/LTB/CSF1/KITL/IL23A/MIF	13
GO_MF_MM_NUCLEOSIDE-TRIPHOSPHATASE_ACTIVITY	GO_MF_MM_NUCLEOSIDE-TRIPHOSPHATASE_ACTIVITY	12/839	148/17799	0.0472873	0.253961	0.217075	CDC6/ATAD2/MCM3/NAV1/FIGNL1/RAD51/TRIP13/NUBP1/RFC3/MCM7/ABCC4/ABCG2	12
GO_BP_MM_PROTEIN_FOLDING	GO_BP_MM_PROTEIN_FOLDING	11/839	132/17799	0.0475489	0.254553	0.217581	PPIC/FKBP5/DNAJB14/FKBP14/TUBB5/DNAJC9/FKBP10/TUBA1B/DNAJC10/UXT/PPIL1	11
GO_CC_MM_SOLUBLE_FRACTION	GO_CC_MM_SOLUBLE_FRACTION	21/839	301/17799	0.0477629	0.254887	0.217866	CCNB1/ASNS/WHRN/MSN/GPX3/SERPINE1/DUSP4/DHFR/PCX/TYMS/APAF1/CCL5/NME1/BAX/CAD/GSR/ME1/LAMC2/CX3CL1/AKT1/PPAT	21
GO_MF_MM_HELICASE_ACTIVITY	GO_MF_MM_HELICASE_ACTIVITY	10/839	117/17799	0.0496154	0.26049	0.222655	RAD54B/BLM/HELLS/MCM3/MCM2/RAD54L/DDX39/EIF4A1/DDX21/DDX18	10
GO_BP_MM_CENTROSOME_ORGANIZATION	GO_BP_MM_CENTROSOME_ORGANIZATION	3/839	18/17799	0.0502076	0.26049	0.222655	PLK1/HAUS4/UXT	3
GO_BP_MM_DNA_DAMAGE_RESPONSE_SIGNAL_TRANSDUCTION_RESULTING_IN_INDUCTION_OF_APOPTOSIS	GO_BP_MM_DNA_DAMAGE_RESPONSE_SIGNAL_TRANSDUCTION_RESULTING_IN_INDUCTION_OF_APOPTOSIS	3/839	18/17799	0.0502076	0.26049	0.222655	BRCA1/HMOX1/SFN	3
GO_BP_MM_INACTIVATION_OF_MAPK_ACTIVITY	GO_BP_MM_INACTIVATION_OF_MAPK_ACTIVITY	3/839	18/17799	0.0502076	0.26049	0.222655	DUSP9/DUSP4/DUSP7	3
GO_BP_MM_POSITIVE_REGULATION_OF_RELEASE_OF_CYTOCHROME_C_FROM_MITOCHONDRIA	GO_BP_MM_POSITIVE_REGULATION_OF_RELEASE_OF_CYTOCHROME_C_FROM_MITOCHONDRIA	3/839	18/17799	0.0502076	0.26049	0.222655	BAX/BAK1/PMAIP1	3
GO_BP_MM_REGULATION_OF_TRANSLATIONAL_INITIATION	GO_BP_MM_REGULATION_OF_TRANSLATIONAL_INITIATION	3/839	18/17799	0.0502076	0.26049	0.222655	NCBP1/TRMT6/EIF5B	3
GO_BP_MM_TUMOR_NECROSIS_FACTOR-MEDIATED_SIGNALING_PATHWAY	GO_BP_MM_TUMOR_NECROSIS_FACTOR-MEDIATED_SIGNALING_PATHWAY	3/839	18/17799	0.0502076	0.26049	0.222655	TNFRSF1B/TNF/TNFRSF11A	3
GO_CC_MM_MALE_GERM_CELL_NUCLEUS	GO_CC_MM_MALE_GERM_CELL_NUCLEUS	3/839	18/17799	0.0502076	0.26049	0.222655	BLM/TOPBP1/TRIP13	3
GO_CC_MM_TRANSPORT_VESICLE_MEMBRANE	GO_CC_MM_TRANSPORT_VESICLE_MEMBRANE	3/839	18/17799	0.0502076	0.26049	0.222655	CPE/PAM/SNTB2	3
GO_BP_MM_REGULATION_OF_APOPTOTIC_PROCESS	GO_BP_MM_REGULATION_OF_APOPTOTIC_PROCESS	13/839	166/17799	0.0505172	0.261291	0.223339	JAK3/BIRC5/LCN2/BOK/APAF1/INHBB/IER3/CASP4/BAX/BAK1/TGFBR1/CSTB/PMAIP1	13
GO_BP_MM_POSITIVE_REGULATION_OF_CELL_ADHESION	GO_BP_MM_POSITIVE_REGULATION_OF_CELL_ADHESION	4/839	30/17799	0.0507698	0.261791	0.223767	ADAM8/ITGAV/CCL5/CX3CL1	4
GO_BP_MM_REGULATION_OF_CELL_SHAPE	GO_BP_MM_REGULATION_OF_CELL_SHAPE	8/839	87/17799	0.0524719	0.269741	0.230562	CCL7/CCL2/SEMA3E/FMNL3/CDC42EP2/FBLIM1/MYH9/ICAM1	8
GO_MF_MM_PROTEIN_HETERODIMERIZATION_ACTIVITY	GO_MF_MM_PROTEIN_HETERODIMERIZATION_ACTIVITY	20/839	287/17799	0.0529161	0.271195	0.231805	BHLHE41/TOP2A/BARD1/SMC2/AXL/PDGFB/RUNX1/BOK/ITGAV/TIMELESS/SDCBP2/TIRAP/MAF/CYBA/BAX/BAK1/TGFBR1/EGFR/SMC4/GCLC	20
GO_BP_MM_IN_UTERO_EMBRYONIC_DEVELOPMENT	GO_BP_MM_IN_UTERO_EMBRYONIC_DEVELOPMENT	16/839	218/17799	0.0534064	0.272876	0.233242	GJB3/CCNB1/HEG1/CCNB2/SERPINA1B/RUNX1/TANC2/WNT7B/POLE/LIG4/TPM1/MYH9/TGFBR1/EPN2/YBX1/RDH10	16
GO_CC_MM_BASOLATERAL_PLASMA_MEMBRANE	GO_CC_MM_BASOLATERAL_PLASMA_MEMBRANE	11/839	135/17799	0.054308	0.276642	0.236461	CDH17/CD44/PDGFB/MSN/SLC12A2/SLC7A6/VANGL2/CAR2/SLC4A4/TGFBR1/EGFR	11
GO_BP_MM_MICROTUBULE_CYTOSKELETON_ORGANIZATION	GO_BP_MM_MICROTUBULE_CYTOSKELETON_ORGANIZATION	6/839	58/17799	0.054685	0.277721	0.237383	BIRC5/TACC3/HOOK1/TUBA1B/UXT/DST	6
GO_MF_MM_SIGNAL_TRANSDUCER_ACTIVITY	GO_MF_MM_SIGNAL_TRANSDUCER_ACTIVITY	15/839	202/17799	0.0553303	0.279039	0.23851	ECT2/HMMR/PASK/PLCG2/ZDHHC13/HMOX1/AHR/VOPP1/LGALS1/ASZ1/GOLT1B/MYH9/STAT5A/EGFR/SMC5	15
GO_MF_MM_METALLOPEPTIDASE_ACTIVITY	GO_MF_MM_METALLOPEPTIDASE_ACTIVITY	8/839	88/17799	0.0554503	0.279039	0.23851	ADAM8/MMP7/MMP23/ACE/CNDP2/BMP1/MMP14/PSMD14	8
GO_BP_MM_MALE_GONAD_DEVELOPMENT	GO_BP_MM_MALE_GONAD_DEVELOPMENT	7/839	73/17799	0.0559096	0.279039	0.23851	NUPR1/BOK/MAS1/KITL/HMGB2/BAX/TESC	7
GO_BP_MM_CELLULAR_PROCESS	GO_BP_MM_CELLULAR_PROCESS	4/839	31/17799	0.056203	0.279039	0.23851	PSRC1/TUBB5/XPNPEP1/METAP1	4
GO_BP_MM_RESPONSE_TO_AXON_INJURY	GO_BP_MM_RESPONSE_TO_AXON_INJURY	4/839	31/17799	0.056203	0.279039	0.23851	CDK1/LGALS1/TSPO/BAX	4
GO_MF_MM_HEPARIN_BINDING	GO_MF_MM_HEPARIN_BINDING	9/839	104/17799	0.0567865	0.279039	0.23851	CCL7/CCL2/SERPINE2/POSTN/PF4/CCL5/THBS1/CTGF/LAMC2	9
GO_BP_MM_EMBRYONIC_ORGAN_DEVELOPMENT	GO_BP_MM_EMBRYONIC_ORGAN_DEVELOPMENT	3/839	19/17799	0.0576005	0.279039	0.23851	WNT7B/EPN2/RDH10	3
GO_BP_MM_LYMPH_NODE_DEVELOPMENT	GO_BP_MM_LYMPH_NODE_DEVELOPMENT	3/839	19/17799	0.0576005	0.279039	0.23851	JAK3/LTB/TNFRSF11A	3
GO_BP_MM_NEGATIVE_REGULATION_OF_GROWTH_OF_SYMBIONT_IN_HOST	GO_BP_MM_NEGATIVE_REGULATION_OF_GROWTH_OF_SYMBIONT_IN_HOST	3/839	19/17799	0.0576005	0.279039	0.23851	TNF/TIRAP/LBP	3
GO_BP_MM_NEGATIVE_REGULATION_OF_PROTEIN_CATABOLIC_PROCESS	GO_BP_MM_NEGATIVE_REGULATION_OF_PROTEIN_CATABOLIC_PROCESS	3/839	19/17799	0.0576005	0.279039	0.23851	SERPINE2/MAD2L1/EGFR	3
GO_BP_MM_PROTEIN_MONOUBIQUITINATION	GO_BP_MM_PROTEIN_MONOUBIQUITINATION	3/839	19/17799	0.0576005	0.279039	0.23851	DTL/UBE2T/CDC34	3
GO_BP_MM_PROTEIN_PEPTIDYL-PROLYL_ISOMERIZATION	GO_BP_MM_PROTEIN_PEPTIDYL-PROLYL_ISOMERIZATION	3/839	19/17799	0.0576005	0.279039	0.23851	FKBP5/FKBP14/FKBP10	3
GO_BP_MM_RESPONSE_TO_INTERFERON-GAMMA	GO_BP_MM_RESPONSE_TO_INTERFERON-GAMMA	3/839	19/17799	0.0576005	0.279039	0.23851	CCL5/CXCL16/UBD	3
GO_MF_MM_ADP_BINDING	GO_MF_MM_ADP_BINDING	3/839	19/17799	0.0576005	0.279039	0.23851	APAF1/MYH9/GCLC	3
GO_MF_MM_PHOSPHATIDYLINOSITOL-3_4_5-TRISPHOSPHATE_BINDING	GO_MF_MM_PHOSPHATIDYLINOSITOL-3_4_5-TRISPHOSPHATE_BINDING	3/839	19/17799	0.0576005	0.279039	0.23851	PHLDA3/MYO1B/AKT1	3
GO_MF_MM_WW_DOMAIN_BINDING	GO_MF_MM_WW_DOMAIN_BINDING	3/839	19/17799	0.0576005	0.279039	0.23851	PMEPA1/SCNN1A/KIF20B	3
GO_BP_MM_NEGATIVE_REGULATION_OF_CYSTEINE-TYPE_ENDOPEPTIDASE_ACTIVITY_INVOLVED_IN_APOPTOTIC_PROCESS	GO_BP_MM_NEGATIVE_REGULATION_OF_CYSTEINE-TYPE_ENDOPEPTIDASE_ACTIVITY_INVOLVED_IN_APOPTOTIC_PROCESS	6/839	59/17799	0.0585626	0.281268	0.240415	CD44/BIRC5/THBS1/TNFAIP3/SFN/AKT1	6
GO_BP_MM_POSITIVE_REGULATION_OF_PROTEIN_KINASE_B_SIGNALING_CASCADE	GO_BP_MM_POSITIVE_REGULATION_OF_PROTEIN_KINASE_B_SIGNALING_CASCADE	6/839	59/17799	0.0585626	0.281268	0.240415	ADAM8/AXL/TNF/THBS1/TGFBR1/EGFR	6
GO_CC_MM_CAVEOLA	GO_CC_MM_CAVEOLA	6/839	59/17799	0.0585626	0.281268	0.240415	LRP8/PTGS2/EFNA5/HMOX1/ATP1B3/TGFBR1	6
GO_CC_MM_EARLY_ENDOSOME	GO_CC_MM_EARLY_ENDOSOME	10/839	121/17799	0.0597409	0.28611	0.244554	KIFC1/PCSK9/SLC11A2/PTP4A3/LDLRAP1/EHD1/ANXA2/PARM1/WDFY1/RAB31	10
GO_BP_MM_NEGATIVE_REGULATION_OF_CELL_CYCLE	GO_BP_MM_NEGATIVE_REGULATION_OF_CELL_CYCLE	4/839	32/17799	0.0619357	0.292455	0.249977	CDK6/NUPR1/GMNN/ETS1	4
GO_BP_MM_RESPONSE_TO_BACTERIUM	GO_BP_MM_RESPONSE_TO_BACTERIUM	4/839	32/17799	0.0619357	0.292455	0.249977	CCL2/LCN2/CCL5/TIRAP	4
GO_BP_MM_RESPONSE_TO_INTERLEUKIN-1	GO_BP_MM_RESPONSE_TO_INTERLEUKIN-1	4/839	32/17799	0.0619357	0.292455	0.249977	CD38/TNFRSF11A/ETS1/CYBA	4
GO_CC_MM_ENDOCYTIC_VESICLE	GO_CC_MM_ENDOCYTIC_VESICLE	4/839	32/17799	0.0619357	0.292455	0.249977	EHD1/RALA/EGFR/IGF2R	4
GO_MF_MM_UBIQUITIN_BINDING	GO_MF_MM_UBIQUITIN_BINDING	4/839	32/17799	0.0619357	0.292455	0.249977	UCHL1/TOP2A/TNFAIP3/OTUB1	4
GO_BP_MM_PEPTIDYL-SERINE_PHOSPHORYLATION	GO_BP_MM_PEPTIDYL-SERINE_PHOSPHORYLATION	6/839	60/17799	0.0626002	0.294765	0.251951	CLSPN/PLK1/PBK/PDGFB/TGFBR1/AKT1	6
GO_BP_MM_NEGATIVE_REGULATION_OF_INFLAMMATORY_RESPONSE	GO_BP_MM_NEGATIVE_REGULATION_OF_INFLAMMATORY_RESPONSE	5/839	46/17799	0.064189	0.300562	0.256907	CTLA2A/TNFRSF1B/ACP5/IER3/TNFAIP3	5
GO_BP_MM_OVARIAN_FOLLICLE_DEVELOPMENT	GO_BP_MM_OVARIAN_FOLLICLE_DEVELOPMENT	5/839	46/17799	0.064189	0.300562	0.256907	KITL/AHR/BAX/ICAM1/MMP14	5
GO_BP_MM_BASE-EXCISION_REPAIR	GO_BP_MM_BASE-EXCISION_REPAIR	3/839	20/17799	0.0654748	0.300719	0.257041	NEIL3/UNG/MPG	3
GO_BP_MM_DNA_DAMAGE_RESPONSE_SIGNAL_TRANSDUCTION_BY_P53_CLASS_MEDIATOR_RESULTING_IN_INDUCTION_OF_APOPTOSIS	GO_BP_MM_DNA_DAMAGE_RESPONSE_SIGNAL_TRANSDUCTION_BY_P53_CLASS_MEDIATOR_RESULTING_IN_INDUCTION_OF_APOPTOSIS	3/839	20/17799	0.0654748	0.300719	0.257041	NUPR1/PHLDA3/AEN	3
GO_BP_MM_NEGATIVE_REGULATION_OF_INTERFERON-GAMMA_PRODUCTION	GO_BP_MM_NEGATIVE_REGULATION_OF_INTERFERON-GAMMA_PRODUCTION	3/839	20/17799	0.0654748	0.300719	0.257041	XCL1/PGLYRP1/AXL	3
GO_BP_MM_NEGATIVE_REGULATION_OF_NEUROGENESIS	GO_BP_MM_NEGATIVE_REGULATION_OF_NEUROGENESIS	3/839	20/17799	0.0654748	0.300719	0.257041	WNT7A/WNT7B/ARHGEF2	3
GO_BP_MM_PROTON_TRANSPORT	GO_BP_MM_PROTON_TRANSPORT	3/839	20/17799	0.0654748	0.300719	0.257041	SLC4A11/SLC11A2/SLC36A1	3
GO_BP_MM_RESPONSE_TO_X-RAY	GO_BP_MM_RESPONSE_TO_X-RAY	3/839	20/17799	0.0654748	0.300719	0.257041	BLM/LIG4/PMAIP1	3
GO_CC_MM_CYTOPLASMIC_STRESS_GRANULE	GO_CC_MM_CYTOPLASMIC_STRESS_GRANULE	3/839	20/17799	0.0654748	0.300719	0.257041	RC3H1/YBX1/EIF2S1	3
GO_BP_MM_PROTEIN_IMPORT_INTO_NUCLEUS	GO_BP_MM_PROTEIN_IMPORT_INTO_NUCLEUS	4/839	33/17799	0.0679641	0.309614	0.264644	KPNA2/KPNA1/RAN/IPO9	4
GO_BP_MM_REGULATION_OF_CELL_ADHESION	GO_BP_MM_REGULATION_OF_CELL_ADHESION	4/839	33/17799	0.0679641	0.309614	0.264644	LAMA3/STAT5A/GSN/ICAM1	4
GO_CC_MM_MYOFIBRIL	GO_CC_MM_MYOFIBRIL	4/839	33/17799	0.0679641	0.309614	0.264644	TNNT2/TWF1/TPM1/ANKRD1	4
GO_BP_MM_CELLULAR_METABOLIC_PROCESS	GO_BP_MM_CELLULAR_METABOLIC_PROCESS	5/839	47/17799	0.069177	0.314288	0.268639	BLM/WNT7B/FAR1/RDH13/GALE	5
GO_CC_MM_ENDOPLASMIC_RETICULUM_LUMEN	GO_CC_MM_ENDOPLASMIC_RETICULUM_LUMEN	7/839	77/17799	0.0704872	0.318532	0.272267	SDF2L1/PCSK9/FKBP14/GLT25D1/FKBP10/BDNF/DNAJC10	7
GO_CC_MM_CELL_PROJECTION	GO_CC_MM_CELL_PROJECTION	6/839	62/17799	0.071156	0.318532	0.272267	SH3PXD2B/ACTR2/CX3CL1/AGFG1/PTPN12/ACTN1	6
GO_MF_MM_ENZYME_BINDING	GO_MF_MM_ENZYME_BINDING	14/839	193/17799	0.0728386	0.318532	0.272267	CD40/PTGS2/SLPI/TOP2A/CSF3/NOXO1/CDC20/COTL1/HMOX1/CAD/LAMB1/EGFR/AKT1/PLAUR	14
GO_BP_MM_ACTIN_FILAMENT_BUNDLE_ASSEMBLY	GO_BP_MM_ACTIN_FILAMENT_BUNDLE_ASSEMBLY	3/839	21/17799	0.0738126	0.318532	0.272267	LCP1/MYO1B/ACTN1	3
GO_BP_MM_AMINO_ACID_TRANSPORT	GO_BP_MM_AMINO_ACID_TRANSPORT	3/839	21/17799	0.0738126	0.318532	0.272267	SLC7A5/SLC7A2/SLC7A1	3
GO_BP_MM_ANION_TRANSPORT	GO_BP_MM_ANION_TRANSPORT	3/839	21/17799	0.0738126	0.318532	0.272267	SLC4A11/SLC4A7/SLC4A4	3
GO_BP_MM_CELL_CHEMOTAXIS	GO_BP_MM_CELL_CHEMOTAXIS	3/839	21/17799	0.0738126	0.318532	0.272267	PDGFB/HMGB2/PIP5K1A	3
GO_MF_MM_BETA-AMYLOID_BINDING	GO_MF_MM_BETA-AMYLOID_BINDING	3/839	21/17799	0.0738126	0.318532	0.272267	FBXO2/LDLRAP1/IDE	3
GO_MF_MM_CALCIUM-DEPENDENT_PHOSPHOLIPID_BINDING	GO_MF_MM_CALCIUM-DEPENDENT_PHOSPHOLIPID_BINDING	3/839	21/17799	0.0738126	0.318532	0.272267	ANXA8/ANXA3/ANXA2	3
GO_MF_MM_CARBOXYPEPTIDASE_ACTIVITY	GO_MF_MM_CARBOXYPEPTIDASE_ACTIVITY	3/839	21/17799	0.0738126	0.318532	0.272267	CPE/ACE/CNDP2	3
GO_BP_MM_PROTEIN_DEPHOSPHORYLATION	GO_BP_MM_PROTEIN_DEPHOSPHORYLATION	10/839	126/17799	0.0741686	0.318532	0.272267	PPM1J/DUSP9/CDKN3/DUSP4/CDC25B/DUSP7/PTP4A3/PTPRS/RNGTT/PTPN12	10
GO_CC_MM_CHROMOSOME_TELOMERIC_REGION	GO_CC_MM_CHROMOSOME_TELOMERIC_REGION	4/839	34/17799	0.0742837	0.318532	0.272267	BLM/CHEK1/MRE11A/SMC5	4
GO_MF_MM_PROTEIN_SELF-ASSOCIATION	GO_MF_MM_PROTEIN_SELF-ASSOCIATION	4/839	34/17799	0.0742837	0.318532	0.272267	PCSK9/CCL5/RSAD2/TNFAIP3	4
GO_BP_MM_G1_S_TRANSITION_OF_MITOTIC_CELL_CYCLE	GO_BP_MM_G1_S_TRANSITION_OF_MITOTIC_CELL_CYCLE	5/839	48/17799	0.0743729	0.318532	0.272267	IQGAP3/CDCA5/POLE/RCC1/USP37	5
GO_BP_MM_MEIOSIS	GO_BP_MM_MEIOSIS	5/839	48/17799	0.0743729	0.318532	0.272267	NEK2/MKI67/EXO1/MRE11A/RAD51	5
GO_CC_MM_CELL-CELL_JUNCTION	GO_CC_MM_CELL-CELL_JUNCTION	8/839	94/17799	0.0755561	0.318532	0.272267	IQGAP3/HEG1/ECT2/VANGL2/9430020K01RIK/TWF1/VCL/KIRREL	8
GO_BP_MM_NEGATIVE_REGULATION_OF_CELL_MIGRATION	GO_BP_MM_NEGATIVE_REGULATION_OF_CELL_MIGRATION	6/839	63/17799	0.0756736	0.318532	0.272267	CX3CR1/PDGFB/SERPINE1/CNN2/ABHD2/RAP2B	6
GO_MF_MM_HISTONE_DEACETYLASE_BINDING	GO_MF_MM_HISTONE_DEACETYLASE_BINDING	6/839	63/17799	0.0756736	0.318532	0.272267	BHLHE41/TOP2A/GMNN/KPNA2/SIK1/ANKRD1	6
GO_CC_MM_CYTOSKELETON	GO_CC_MM_CYTOSKELETON	20/839	301/17799	0.0776568	0.318532	0.272267	JAK3/AKAP12/MSN/SPIRE1/PPP1R18/RND1/RIN1/KITL/COTL1/SMTN/DYNLL1/PLEK2/STOM/CORO1C/ARPC1B/MICALL1/EPB4.1L2/UXT/DST/FGD6	20
GO_BP_MM_BLOOD_VESSEL_ENDOTHELIAL_CELL_MIGRATION	GO_BP_MM_BLOOD_VESSEL_ENDOTHELIAL_CELL_MIGRATION	2/839	10/17799	0.0776908	0.318532	0.272267	ADAM8/MYH9	2
GO_BP_MM_DRUG_METABOLIC_PROCESS	GO_BP_MM_DRUG_METABOLIC_PROCESS	2/839	10/17799	0.0776908	0.318532	0.272267	DCK/CAD	2
GO_BP_MM_GENE_EXPRESSION	GO_BP_MM_GENE_EXPRESSION	2/839	10/17799	0.0776908	0.318532	0.272267	LTB/ZBTB25	2
GO_BP_MM_INOSITOL_PHOSPHATE_DEPHOSPHORYLATION	GO_BP_MM_INOSITOL_PHOSPHATE_DEPHOSPHORYLATION	2/839	10/17799	0.0776908	0.318532	0.272267	MTMR7/MTMR2	2
GO_BP_MM_MITOCHONDRIAL_FUSION	GO_BP_MM_MITOCHONDRIAL_FUSION	2/839	10/17799	0.0776908	0.318532	0.272267	BAX/BAK1	2
GO_BP_MM_MITOTIC_CELL_CYCLE_SPINDLE_ASSEMBLY_CHECKPOINT	GO_BP_MM_MITOTIC_CELL_CYCLE_SPINDLE_ASSEMBLY_CHECKPOINT	2/839	10/17799	0.0776908	0.318532	0.272267	MAD2L1/CEP192	2
GO_BP_MM_NEGATIVE_REGULATION_OF_CELL-MATRIX_ADHESION	GO_BP_MM_NEGATIVE_REGULATION_OF_CELL-MATRIX_ADHESION	2/839	10/17799	0.0776908	0.318532	0.272267	SEMA3E/THBS1	2
GO_BP_MM_NEGATIVE_REGULATION_OF_INTERLEUKIN-2_PRODUCTION	GO_BP_MM_NEGATIVE_REGULATION_OF_INTERLEUKIN-2_PRODUCTION	2/839	10/17799	0.0776908	0.318532	0.272267	XCL1/TNFAIP3	2
GO_BP_MM_NITRIC_OXIDE_MEDIATED_SIGNAL_TRANSDUCTION	GO_BP_MM_NITRIC_OXIDE_MEDIATED_SIGNAL_TRANSDUCTION	2/839	10/17799	0.0776908	0.318532	0.272267	MT2/MT1	2
GO_BP_MM_OXALOACETATE_METABOLIC_PROCESS	GO_BP_MM_OXALOACETATE_METABOLIC_PROCESS	2/839	10/17799	0.0776908	0.318532	0.272267	PCX/STAT5A	2
GO_BP_MM_POSITIVE_REGULATION_OF_BLOOD_COAGULATION	GO_BP_MM_POSITIVE_REGULATION_OF_BLOOD_COAGULATION	2/839	10/17799	0.0776908	0.318532	0.272267	SERPINE1/THBS1	2
GO_BP_MM_POSITIVE_REGULATION_OF_DEFENSE_RESPONSE_TO_VIRUS_BY_HOST	GO_BP_MM_POSITIVE_REGULATION_OF_DEFENSE_RESPONSE_TO_VIRUS_BY_HOST	2/839	10/17799	0.0776908	0.318532	0.272267	CCL5/IL23A	2
GO_BP_MM_REGULATION_OF_MICROTUBULE-BASED_PROCESS	GO_BP_MM_REGULATION_OF_MICROTUBULE-BASED_PROCESS	2/839	10/17799	0.0776908	0.318532	0.272267	TACC3/MEMO1	2
GO_BP_MM_REGULATION_OF_MITOCHONDRIAL_MEMBRANE_POTENTIAL	GO_BP_MM_REGULATION_OF_MITOCHONDRIAL_MEMBRANE_POTENTIAL	2/839	10/17799	0.0776908	0.318532	0.272267	BAX/BAK1	2
GO_BP_MM_SEQUESTERING_OF_ACTIN_MONOMERS	GO_BP_MM_SEQUESTERING_OF_ACTIN_MONOMERS	2/839	10/17799	0.0776908	0.318532	0.272267	TWF1/PFN1	2
GO_BP_MM_SPINDLE_ASSEMBLY_INVOLVED_IN_MITOSIS	GO_BP_MM_SPINDLE_ASSEMBLY_INVOLVED_IN_MITOSIS	2/839	10/17799	0.0776908	0.318532	0.272267	KIF11/MYBL2	2
GO_CC_MM_MRNA_CAP_BINDING_COMPLEX	GO_CC_MM_MRNA_CAP_BINDING_COMPLEX	2/839	10/17799	0.0776908	0.318532	0.272267	NCBP1/RNMT	2
GO_MF_MM_CLATHRIN_BINDING	GO_MF_MM_CLATHRIN_BINDING	2/839	10/17799	0.0776908	0.318532	0.272267	LDLRAP1/SMAP1	2
GO_MF_MM_MHC_CLASS_I_PROTEIN_BINDING	GO_MF_MM_MHC_CLASS_I_PROTEIN_BINDING	2/839	10/17799	0.0776908	0.318532	0.272267	TUBB5/TUBB4B	2
GO_MF_MM_TITIN_BINDING	GO_MF_MM_TITIN_BINDING	2/839	10/17799	0.0776908	0.318532	0.272267	CALM1/ANKRD1	2
GO_MF_MM_TRANSFORMING_GROWTH_FACTOR_BETA_BINDING	GO_MF_MM_TRANSFORMING_GROWTH_FACTOR_BETA_BINDING	2/839	10/17799	0.0776908	0.318532	0.272267	ITGAV/TGFBR1	2
GO_MF_MM_PROTEASE_BINDING	GO_MF_MM_PROTEASE_BINDING	5/839	49/17799	0.0797749	0.326281	0.27889	LCN2/TNF/SERPINE1/CSTB/TNFAIP3	5
GO_BP_MM_CHEMOTAXIS	GO_BP_MM_CHEMOTAXIS	6/839	64/17799	0.0803502	0.327837	0.28022	XCL1/CCL20/CCL9/CXCL16/CX3CL1/CXCL10	6
GO_BP_MM_RESPONSE_TO_AMINO_ACID_STIMULUS	GO_BP_MM_RESPONSE_TO_AMINO_ACID_STIMULUS	4/839	35/17799	0.080889	0.328231	0.280557	CCL2/ASNS/CTGF/ICAM1	4
GO_MF_MM_METHYLATED_HISTONE_RESIDUE_BINDING	GO_MF_MM_METHYLATED_HISTONE_RESIDUE_BINDING	4/839	35/17799	0.080889	0.328231	0.280557	UHRF1/CBX2/NCAPG2/NCAPD3	4
GO_MF_MM_PROTEIN_C-TERMINUS_BINDING	GO_MF_MM_PROTEIN_C-TERMINUS_BINDING	11/839	145/17799	0.0813364	0.328231	0.280557	MKI67/TOP2A/CENPF/CDC20/MRE11A/RAD51/DYNLL1/SDCBP2/OPTN/LIG4/DST	11
GO_BP_MM_DNA_DAMAGE_CHECKPOINT	GO_BP_MM_DNA_DAMAGE_CHECKPOINT	3/839	22/17799	0.0825946	0.328231	0.280557	CLSPN/E2F1/CHEK1	3
GO_BP_MM_DNA_METABOLIC_PROCESS	GO_BP_MM_DNA_METABOLIC_PROCESS	3/839	22/17799	0.0825946	0.328231	0.280557	MKI67/MRE11A/RAD51	3
GO_BP_MM_MRNA_EXPORT_FROM_NUCLEUS	GO_BP_MM_MRNA_EXPORT_FROM_NUCLEUS	3/839	22/17799	0.0825946	0.328231	0.280557	NCBP1/DDX39/EIF5A	3
GO_BP_MM_MYELOID_CELL_DIFFERENTIATION	GO_BP_MM_MYELOID_CELL_DIFFERENTIATION	3/839	22/17799	0.0825946	0.328231	0.280557	RUNX1/PLSCR1/TIRAP	3
GO_BP_MM_PEPTIDE_CROSS-LINKING	GO_BP_MM_PEPTIDE_CROSS-LINKING	3/839	22/17799	0.0825946	0.328231	0.280557	SPRR1A/IVL/THBS1	3
GO_BP_MM_POSITIVE_REGULATION_OF_ENDOTHELIAL_CELL_MIGRATION	GO_BP_MM_POSITIVE_REGULATION_OF_ENDOTHELIAL_CELL_MIGRATION	3/839	22/17799	0.0825946	0.328231	0.280557	FLT4/THBS1/ANXA3	3
GO_BP_MM_PROTEIN_TETRAMERIZATION	GO_BP_MM_PROTEIN_TETRAMERIZATION	3/839	22/17799	0.0825946	0.328231	0.280557	CCL5/ME1/MTMR2	3
GO_BP_MM_SYNAPSE_ORGANIZATION	GO_BP_MM_SYNAPSE_ORGANIZATION	3/839	22/17799	0.0825946	0.328231	0.280557	WNT7A/SEMA3E/WNT7B	3
GO_BP_MM_RESPONSE_TO_PEPTIDE_HORMONE_STIMULUS	GO_BP_MM_RESPONSE_TO_PEPTIDE_HORMONE_STIMULUS	8/839	96/17799	0.0831172	0.329528	0.281666	PLAT/SERPINA7/TIMP1/SERPINA1B/TFF3/MAS1/CTGF/STAT5A	8
GO_BP_MM_PROTEIN_COMPLEX_ASSEMBLY	GO_BP_MM_PROTEIN_COMPLEX_ASSEMBLY	5/839	50/17799	0.0853806	0.33502	0.28636	CCNB1/CDK1/NUPR1/GMNN/PAK3	5
GO_BP_MM_REGULATION_OF_SEQUENCE-SPECIFIC_DNA_BINDING_TRANSCRIPTION_FACTOR_ACTIVITY	GO_BP_MM_REGULATION_OF_SEQUENCE-SPECIFIC_DNA_BINDING_TRANSCRIPTION_FACTOR_ACTIVITY	5/839	50/17799	0.0853806	0.33502	0.28636	FOXM1/FOXQ1/HMOX1/FOXN2/FOXA3	5
GO_MF_MM_PROTEIN_PHOSPHATASE_BINDING	GO_MF_MM_PROTEIN_PHOSPHATASE_BINDING	5/839	50/17799	0.0853806	0.33502	0.28636	NEK2/FLT4/KCNN4/EGFR/RPA2	5
GO_MF_MM_ATP-DEPENDENT_HELICASE_ACTIVITY	GO_MF_MM_ATP-DEPENDENT_HELICASE_ACTIVITY	8/839	97/17799	0.087059	0.33502	0.28636	BRIP1/BLM/RAD54L/DDX39/GTF2F2/EIF4A1/DDX21/DDX18	8
GO_BP_MM_BLOOD_VESSEL_REMODELING	GO_BP_MM_BLOOD_VESSEL_REMODELING	4/839	36/17799	0.0877741	0.33502	0.28636	AXL/LIF/BAX/BAK1	4
GO_BP_MM_NEGATIVE_REGULATION_OF_PROTEIN_PHOSPHORYLATION	GO_BP_MM_NEGATIVE_REGULATION_OF_PROTEIN_PHOSPHORYLATION	4/839	36/17799	0.0877741	0.33502	0.28636	CCNB1/MAS1/DNAJC10/KIRREL	4
GO_BP_MM_PHOSPHORYLATION	GO_BP_MM_PHOSPHORYLATION	4/839	36/17799	0.0877741	0.33502	0.28636	CDK6/MASTL/AKT1/PGK1	4
GO_BP_MM_POSITIVE_REGULATION_OF_ANTI-APOPTOSIS	GO_BP_MM_POSITIVE_REGULATION_OF_ANTI-APOPTOSIS	4/839	36/17799	0.0877741	0.33502	0.28636	JAK3/ADM/HMOX1/AKT1	4
GO_BP_MM_PROTEIN_K48-LINKED_UBIQUITINATION	GO_BP_MM_PROTEIN_K48-LINKED_UBIQUITINATION	4/839	36/17799	0.0877741	0.33502	0.28636	UBE2C/UBE2T/CDC34/TNFAIP3	4
GO_MF_MM_DRUG_BINDING	GO_MF_MM_DRUG_BINDING	6/839	66/17799	0.0901763	0.33502	0.28636	CNR1/P2RX2/TOP2A/DHFR/ACE/DCK	6
GO_MF_MM_ATPASE_ACTIVITY	GO_MF_MM_ATPASE_ACTIVITY	11/839	148/17799	0.0908302	0.33502	0.28636	TNNT2/BLM/MCM2/MCM4/RFC3/MCM7/ABCC4/KIF20B/ABCG2/MYH9/IDE	11
GO_BP_MM_IRON_ION_HOMEOSTASIS	GO_BP_MM_IRON_ION_HOMEOSTASIS	3/839	23/17799	0.0918006	0.33502	0.28636	STEAP1/STEAP4/HMOX1	3
GO_BP_MM_POSITIVE_REGULATION_OF_STRESS_FIBER_ASSEMBLY	GO_BP_MM_POSITIVE_REGULATION_OF_STRESS_FIBER_ASSEMBLY	3/839	23/17799	0.0918006	0.33502	0.28636	CTGF/FHOD1/PFN1	3
GO_BP_MM_RESPONSE_TO_CADMIUM_ION	GO_BP_MM_RESPONSE_TO_CADMIUM_ION	3/839	23/17799	0.0918006	0.33502	0.28636	CDK1/SLC11A2/PCNA	3
GO_CC_MM_CORTICAL_CYTOSKELETON	GO_CC_MM_CORTICAL_CYTOSKELETON	3/839	23/17799	0.0918006	0.33502	0.28636	TPM4/MYH9/ACTN1	3
GO_CC_MM_NUCLEAR_INNER_MEMBRANE	GO_CC_MM_NUCLEAR_INNER_MEMBRANE	3/839	23/17799	0.0918006	0.33502	0.28636	NRM/LMNB1/LBR	3
GO_BP_MM_ACTIN_POLYMERIZATION_OR_DEPOLYMERIZATION	GO_BP_MM_ACTIN_POLYMERIZATION_OR_DEPOLYMERIZATION	2/839	11/17799	0.0920757	0.33502	0.28636	GSN/PAK3	2
GO_BP_MM_ANAGEN	GO_BP_MM_ANAGEN	2/839	11/17799	0.0920757	0.33502	0.28636	PTGS2/AKT1	2
GO_BP_MM_CELLULAR_MEMBRANE_FUSION	GO_BP_MM_CELLULAR_MEMBRANE_FUSION	2/839	11/17799	0.0920757	0.33502	0.28636	ADAM8/USO1	2
GO_BP_MM_DRUG_TRANSMEMBRANE_TRANSPORT	GO_BP_MM_DRUG_TRANSMEMBRANE_TRANSPORT	2/839	11/17799	0.0920757	0.33502	0.28636	ABCC4/ABCG2	2
GO_BP_MM_MAGNESIUM_ION_TRANSPORT	GO_BP_MM_MAGNESIUM_ION_TRANSPORT	2/839	11/17799	0.0920757	0.33502	0.28636	NIPAL1/ZDHHC13	2
GO_BP_MM_NEGATIVE_REGULATION_OF_BLOOD_VESSEL_ENDOTHELIAL_CELL_MIGRATION	GO_BP_MM_NEGATIVE_REGULATION_OF_BLOOD_VESSEL_ENDOTHELIAL_CELL_MIGRATION	2/839	11/17799	0.0920757	0.33502	0.28636	VASH1/THBS1	2
GO_BP_MM_NEGATIVE_REGULATION_OF_DNA_DAMAGE_RESPONSE_SIGNAL_TRANSDUCTION_BY_P53_CLASS_MEDIATOR	GO_BP_MM_NEGATIVE_REGULATION_OF_DNA_DAMAGE_RESPONSE_SIGNAL_TRANSDUCTION_BY_P53_CLASS_MEDIATOR	2/839	11/17799	0.0920757	0.33502	0.28636	CD44/MIF	2
GO_BP_MM_NEGATIVE_REGULATION_OF_ENDOTHELIAL_CELL_MIGRATION	GO_BP_MM_NEGATIVE_REGULATION_OF_ENDOTHELIAL_CELL_MIGRATION	2/839	11/17799	0.0920757	0.33502	0.28636	VASH1/THBS1	2
GO_BP_MM_NEGATIVE_REGULATION_OF_FIBROBLAST_GROWTH_FACTOR_RECEPTOR_SIGNALING_PATHWAY	GO_BP_MM_NEGATIVE_REGULATION_OF_FIBROBLAST_GROWTH_FACTOR_RECEPTOR_SIGNALING_PATHWAY	2/839	11/17799	0.0920757	0.33502	0.28636	SULF2/THBS1	2
GO_BP_MM_NEGATIVE_REGULATION_OF_GROWTH	GO_BP_MM_NEGATIVE_REGULATION_OF_GROWTH	2/839	11/17799	0.0920757	0.33502	0.28636	MT2/MT1	2
GO_BP_MM_NEGATIVE_REGULATION_OF_PEPTIDYL-SERINE_PHOSPHORYLATION	GO_BP_MM_NEGATIVE_REGULATION_OF_PEPTIDYL-SERINE_PHOSPHORYLATION	2/839	11/17799	0.0920757	0.33502	0.28636	BAX/BAK1	2
GO_BP_MM_NEUTRAL_AMINO_ACID_TRANSPORT	GO_BP_MM_NEUTRAL_AMINO_ACID_TRANSPORT	2/839	11/17799	0.0920757	0.33502	0.28636	SLC1A5/SLC36A1	2
GO_BP_MM_POSITIVE_REGULATION_OF_DNA_DAMAGE_RESPONSE_SIGNAL_TRANSDUCTION_BY_P53_CLASS_MEDIATOR	GO_BP_MM_POSITIVE_REGULATION_OF_DNA_DAMAGE_RESPONSE_SIGNAL_TRANSDUCTION_BY_P53_CLASS_MEDIATOR	2/839	11/17799	0.0920757	0.33502	0.28636	PMAIP1/ANKRD1	2
GO_BP_MM_POSITIVE_REGULATION_OF_TUMOR_NECROSIS_FACTOR_BIOSYNTHETIC_PROCESS	GO_BP_MM_POSITIVE_REGULATION_OF_TUMOR_NECROSIS_FACTOR_BIOSYNTHETIC_PROCESS	2/839	11/17799	0.0920757	0.33502	0.28636	THBS1/LBP	2
GO_BP_MM_RESPONSE_TO_AMINE_STIMULUS	GO_BP_MM_RESPONSE_TO_AMINE_STIMULUS	2/839	11/17799	0.0920757	0.33502	0.28636	CDK1/CAD	2
GO_BP_MM_SKELETAL_MUSCLE_TISSUE_REGENERATION	GO_BP_MM_SKELETAL_MUSCLE_TISSUE_REGENERATION	2/839	11/17799	0.0920757	0.33502	0.28636	PLAU/PLAUR	2
GO_MF_MM_14-3-3_PROTEIN_BINDING	GO_MF_MM_14-3-3_PROTEIN_BINDING	2/839	11/17799	0.0920757	0.33502	0.28636	DDIT4/SIK1	2
GO_MF_MM_DRUG_TRANSMEMBRANE_TRANSPORTER_ACTIVITY	GO_MF_MM_DRUG_TRANSMEMBRANE_TRANSPORTER_ACTIVITY	2/839	11/17799	0.0920757	0.33502	0.28636	ABCC4/ABCG2	2
GO_MF_MM_LIPOPOLYSACCHARIDE_BINDING	GO_MF_MM_LIPOPOLYSACCHARIDE_BINDING	2/839	11/17799	0.0920757	0.33502	0.28636	CD14/LBP	2
GO_MF_MM_MICROFILAMENT_MOTOR_ACTIVITY	GO_MF_MM_MICROFILAMENT_MOTOR_ACTIVITY	2/839	11/17799	0.0920757	0.33502	0.28636	MYO1B/MYH9	2
GO_MF_MM_PHOSPHATIDYLINOSITOL-3_5-BISPHOSPHATE_BINDING	GO_MF_MM_PHOSPHATIDYLINOSITOL-3_5-BISPHOSPHATE_BINDING	2/839	11/17799	0.0920757	0.33502	0.28636	PHLDA3/SH3PXD2B	2
GO_MF_MM_PLATELET-DERIVED_GROWTH_FACTOR_BINDING	GO_MF_MM_PLATELET-DERIVED_GROWTH_FACTOR_BINDING	2/839	11/17799	0.0920757	0.33502	0.28636	PDGFB/COL4A1	2
GO_BP_MM_MULTICELLULAR_ORGANISMAL_DEVELOPMENT	GO_BP_MM_MULTICELLULAR_ORGANISMAL_DEVELOPMENT	24/839	382/17799	0.0937604	0.340413	0.290969	WNT10A/UHRF1/PAQR5/WNT7A/DKK3/HELLS/MBNL3/SEMA3E/TNF/ZDHHC2/TUBD1/DONSON/WNT7B/APAF1/HOOK1/VANGL2/TNFRSF11A/ZDHHC15/PDLIM7/H2AFZ/ASZ1/SMPD3/ITGB6/AGFG1	24
GO_BP_MM_RESPONSE_TO_HORMONE_STIMULUS	GO_BP_MM_RESPONSE_TO_HORMONE_STIMULUS	6/839	67/17799	0.0953232	0.345341	0.295182	FHL2/CD38/ME1/MMP14/AKT1/GCLC	6
GO_BP_MM_CELL-MATRIX_ADHESION	GO_BP_MM_CELL-MATRIX_ADHESION	5/839	52/17799	0.0971925	0.350602	0.299679	ADAM8/NID1/ITGAV/CTGF/ITGB6	5
GO_MF_MM_CYTOSKELETAL_PROTEIN_BINDING	GO_MF_MM_CYTOSKELETAL_PROTEIN_BINDING	5/839	52/17799	0.0971925	0.350602	0.299679	FLNC/MSN/SDC3/ANXA2/EPB4.1L2	5
GO_BP_MM_POSITIVE_REGULATION_OF_PROTEIN_PHOSPHORYLATION	GO_BP_MM_POSITIVE_REGULATION_OF_PROTEIN_PHOSPHORYLATION	8/839	100/17799	0.0995255	0.355982	0.304277	IQGAP3/CD40/IL34/TNF/FLT4/CTGF/AKT1/MIF	8
GO_BP_MM_BLOOD_VESSEL_MORPHOGENESIS	GO_BP_MM_BLOOD_VESSEL_MORPHOGENESIS	3/839	24/17799	0.101409	0.355982	0.304277	PLAT/PLAU/FLT4	3
GO_BP_MM_EMBRYONIC_FORELIMB_MORPHOGENESIS	GO_BP_MM_EMBRYONIC_FORELIMB_MORPHOGENESIS	3/839	24/17799	0.101409	0.355982	0.304277	WNT7A/LNP/RDH10	3
GO_BP_MM_INDUCTION_OF_APOPTOSIS_BY_EXTRACELLULAR_SIGNALS	GO_BP_MM_INDUCTION_OF_APOPTOSIS_BY_EXTRACELLULAR_SIGNALS	3/839	24/17799	0.101409	0.355982	0.304277	TNF/BAX/BAK1	3
GO_BP_MM_NEGATIVE_REGULATION_OF_FIBROBLAST_PROLIFERATION	GO_BP_MM_NEGATIVE_REGULATION_OF_FIBROBLAST_PROLIFERATION	3/839	24/17799	0.101409	0.355982	0.304277	NUPR1/BAX/PMAIP1	3
GO_BP_MM_RELEASE_OF_SEQUESTERED_CALCIUM_ION_INTO_CYTOSOL	GO_BP_MM_RELEASE_OF_SEQUESTERED_CALCIUM_ION_INTO_CYTOSOL	3/839	24/17799	0.101409	0.355982	0.304277	XCL1/ITGAV/PLCG2	3
GO_BP_MM_SUBSTRATE_ADHESION-DEPENDENT_CELL_SPREADING	GO_BP_MM_SUBSTRATE_ADHESION-DEPENDENT_CELL_SPREADING	3/839	24/17799	0.101409	0.355982	0.304277	BRCA1/AXL/LAMB1	3
GO_BP_MM_TISSUE_REGENERATION	GO_BP_MM_TISSUE_REGENERATION	3/839	24/17799	0.101409	0.355982	0.304277	CCNB1/SERPINE1/GSN	3
GO_CC_MM_HETEROCHROMATIN	GO_CC_MM_HETEROCHROMATIN	3/839	24/17799	0.101409	0.355982	0.304277	UHRF1/CBX2/DNMT1	3
GO_MF_MM_PROTEIN_DOMAIN_SPECIFIC_BINDING	GO_MF_MM_PROTEIN_DOMAIN_SPECIFIC_BINDING	13/839	186/17799	0.10159	0.355982	0.304277	FOXM1/WHRN/BASP1/MLF1/TACC3/DYNLL1/RAP2B/HMGB2/FOXA3/SSX2IP/SFN/ACTN1/CALM1	13
GO_BP_MM_REGULATION_OF_CELL_GROWTH	GO_BP_MM_REGULATION_OF_CELL_GROWTH	4/839	38/17799	0.102355	0.355982	0.304277	IGFBP4/IGFBP7/CTGF/SBF1	4
GO_MF_MM_PROTEIN_KINASE_BINDING	GO_MF_MM_PROTEIN_KINASE_BINDING	17/839	258/17799	0.103385	0.355982	0.304277	KIF11/FOXM1/PLK1/CCNA2/CCNB1/PRC1/RACGAP1/CCNB2/MSN/CCNE1/AURKA/CDKN2B/TPX2/CDC25B/USP37/SIK1/AKT1	17
GO_BP_MM_GTP_CATABOLIC_PROCESS	GO_BP_MM_GTP_CATABOLIC_PROCESS	14/839	205/17799	0.105688	0.355982	0.304277	GEM/TUBD1/RND1/TUBB2B/TUBB5/TUBG1/RAP2B/TUBB6/RALB/RAN/TUBB4B/RALA/TUBA1B/RAB31	14
GO_CC_MM_MELANOSOME	GO_CC_MM_MELANOSOME	7/839	85/17799	0.105797	0.355982	0.304277	TFRC/STOM/ATP1B3/AHCY/ANXA2/RAN/MMP14	7
GO_BP_MM_CYTOKINE-MEDIATED_SIGNALING_PATHWAY	GO_BP_MM_CYTOKINE-MEDIATED_SIGNALING_PATHWAY	6/839	69/17799	0.106077	0.355982	0.304277	CCL2/JAK3/CX3CR1/PF4/STAT5A/CX3CL1	6
GO_BP_MM_APOPTOTIC_CELL_CLEARANCE	GO_BP_MM_APOPTOTIC_CELL_CLEARANCE	2/839	12/17799	0.107155	0.355982	0.304277	AXL/ITGAV	2
GO_BP_MM_HYPOTHALAMUS_DEVELOPMENT	GO_BP_MM_HYPOTHALAMUS_DEVELOPMENT	2/839	12/17799	0.107155	0.355982	0.304277	ETS1/BAX	2
GO_BP_MM_INDUCTION_OF_APOPTOSIS_BY_INTRACELLULAR_SIGNALS	GO_BP_MM_INDUCTION_OF_APOPTOSIS_BY_INTRACELLULAR_SIGNALS	2/839	12/17799	0.107155	0.355982	0.304277	BAX/PMAIP1	2
GO_BP_MM_MISMATCH_REPAIR	GO_BP_MM_MISMATCH_REPAIR	2/839	12/17799	0.107155	0.355982	0.304277	EXO1/PCNA	2
GO_BP_MM_MYELOID_DENDRITIC_CELL_DIFFERENTIATION	GO_BP_MM_MYELOID_DENDRITIC_CELL_DIFFERENTIATION	2/839	12/17799	0.107155	0.355982	0.304277	CSF2/UBD	2
GO_BP_MM_NATURAL_KILLER_CELL_DIFFERENTIATION	GO_BP_MM_NATURAL_KILLER_CELL_DIFFERENTIATION	2/839	12/17799	0.107155	0.355982	0.304277	AXL/STAT5A	2
GO_BP_MM_NEGATIVE_REGULATION_OF_T_CELL_ACTIVATION	GO_BP_MM_NEGATIVE_REGULATION_OF_T_CELL_ACTIVATION	2/839	12/17799	0.107155	0.355982	0.304277	JAK3/VTCN1	2
GO_BP_MM_PHOSPHATIDYLINOSITOL_DEPHOSPHORYLATION	GO_BP_MM_PHOSPHATIDYLINOSITOL_DEPHOSPHORYLATION	2/839	12/17799	0.107155	0.355982	0.304277	MTMR7/MTMR2	2
GO_BP_MM_POSITIVE_REGULATION_OF_CALCIUM_ION_TRANSPORT_INTO_CYTOSOL	GO_BP_MM_POSITIVE_REGULATION_OF_CALCIUM_ION_TRANSPORT_INTO_CYTOSOL	2/839	12/17799	0.107155	0.355982	0.304277	BAX/BAK1	2
GO_BP_MM_POSITIVE_REGULATION_OF_CELLULAR_COMPONENT_MOVEMENT	GO_BP_MM_POSITIVE_REGULATION_OF_CELLULAR_COMPONENT_MOVEMENT	2/839	12/17799	0.107155	0.355982	0.304277	ETS1/TGFBR1	2
GO_BP_MM_POSITIVE_REGULATION_OF_GLUCOSE_METABOLIC_PROCESS	GO_BP_MM_POSITIVE_REGULATION_OF_GLUCOSE_METABOLIC_PROCESS	2/839	12/17799	0.107155	0.355982	0.304277	PMAIP1/AKT1	2
GO_BP_MM_POSITIVE_REGULATION_OF_INNATE_IMMUNE_RESPONSE	GO_BP_MM_POSITIVE_REGULATION_OF_INNATE_IMMUNE_RESPONSE	2/839	12/17799	0.107155	0.355982	0.304277	XCL1/PLSCR1	2
GO_BP_MM_POSITIVE_REGULATION_OF_INTRINSIC_APOPTOTIC_SIGNALING_PATHWAY	GO_BP_MM_POSITIVE_REGULATION_OF_INTRINSIC_APOPTOTIC_SIGNALING_PATHWAY	2/839	12/17799	0.107155	0.355982	0.304277	BAX/PMAIP1	2
GO_BP_MM_POSITIVE_REGULATION_OF_RECEPTOR-MEDIATED_ENDOCYTOSIS	GO_BP_MM_POSITIVE_REGULATION_OF_RECEPTOR-MEDIATED_ENDOCYTOSIS	2/839	12/17799	0.107155	0.355982	0.304277	SERPINE1/LDLRAP1	2
GO_BP_MM_POSITIVE_REGULATION_OF_TYROSINE_PHOSPHORYLATION_OF_STAT5_PROTEIN	GO_BP_MM_POSITIVE_REGULATION_OF_TYROSINE_PHOSPHORYLATION_OF_STAT5_PROTEIN	2/839	12/17799	0.107155	0.355982	0.304277	CSF2/IL23A	2
GO_BP_MM_PROTEIN_K48-LINKED_DEUBIQUITINATION	GO_BP_MM_PROTEIN_K48-LINKED_DEUBIQUITINATION	2/839	12/17799	0.107155	0.355982	0.304277	OTUB1/USP37	2
GO_BP_MM_PROTEIN_TARGETING_TO_PLASMA_MEMBRANE	GO_BP_MM_PROTEIN_TARGETING_TO_PLASMA_MEMBRANE	2/839	12/17799	0.107155	0.355982	0.304277	PIP5K1A/TESC	2
GO_BP_MM_RESPONSE_TO_FOLIC_ACID	GO_BP_MM_RESPONSE_TO_FOLIC_ACID	2/839	12/17799	0.107155	0.355982	0.304277	ABCG2/GSN	2
GO_BP_MM_RESPONSE_TO_LIPID	GO_BP_MM_RESPONSE_TO_LIPID	2/839	12/17799	0.107155	0.355982	0.304277	BRCA1/PCNA	2
GO_BP_MM_RESPONSE_TO_SALT_STRESS	GO_BP_MM_RESPONSE_TO_SALT_STRESS	2/839	12/17799	0.107155	0.355982	0.304277	CCL5/BAX	2
GO_BP_MM_SODIUM_ION_TRANSMEMBRANE_TRANSPORT	GO_BP_MM_SODIUM_ION_TRANSMEMBRANE_TRANSPORT	2/839	12/17799	0.107155	0.355982	0.304277	SLC4A11/SCNN1A	2
GO_BP_MM_SYNAPTONEMAL_COMPLEX_ASSEMBLY	GO_BP_MM_SYNAPTONEMAL_COMPLEX_ASSEMBLY	2/839	12/17799	0.107155	0.355982	0.304277	TRIP13/SYCE2	2
GO_CC_MM_FASCIA_ADHERENS	GO_CC_MM_FASCIA_ADHERENS	2/839	12/17799	0.107155	0.355982	0.304277	VCL/ACTN1	2
GO_MF_MM_PHOSPHATIDYLINOSITOL-3_4-BISPHOSPHATE_BINDING	GO_MF_MM_PHOSPHATIDYLINOSITOL-3_4-BISPHOSPHATE_BINDING	2/839	12/17799	0.107155	0.355982	0.304277	PHLDA3/AKT1	2
GO_MF_MM_TROPOMYOSIN_BINDING	GO_MF_MM_TROPOMYOSIN_BINDING	2/839	12/17799	0.107155	0.355982	0.304277	TNNT2/S100A6	2
GO_MF_MM_PROTEIN_TYROSINE_KINASE_ACTIVITY	GO_MF_MM_PROTEIN_TYROSINE_KINASE_ACTIVITY	29/839	483/17799	0.108635	0.360189	0.307873	MELK/JAK3/MAPK11/RIPK3/PLK1/PBK/NEK2/AURKB/CDK1/AXL/CDK6/CHEK1/AURKA/PLK4/PASK/FLT4/MASTL/TWF1/STK35/CAMKK2/TGFBR1/SLK/STK25/PAK3/EGFR/NEK7/SIK1/AKT1/RIPK1	29
GO_CC_MM_ENDOSOME	GO_CC_MM_ENDOSOME	10/839	136/17799	0.109052	0.360848	0.308437	CTSE/BACE2/TFRC/ACE/SLC11A2/VOPP1/EHD1/EGFR/IGF2R/YKT6	10
GO_MF_MM_DOUBLE-STRANDED_DNA_BINDING	GO_MF_MM_DOUBLE-STRANDED_DNA_BINDING	9/839	119/17799	0.109263	0.360848	0.308437	FOXM1/NEIL3/FOXQ1/RAD51AP1/RAD51/MAF/FOXN2/STAT5A/FOXA3	9
GO_BP_MM_POSITIVE_REGULATION_OF_NEURON_APOPTOTIC_PROCESS	GO_BP_MM_POSITIVE_REGULATION_OF_NEURON_APOPTOTIC_PROCESS	4/839	39/17799	0.110036	0.361024	0.308587	TNF/PCSK9/BAX/PMAIP1	4
GO_CC_MM_RECYCLING_ENDOSOME	GO_CC_MM_RECYCLING_ENDOSOME	4/839	39/17799	0.110036	0.361024	0.308587	TNF/SLC11A2/LDLRAP1/RAP2B	4
GO_MF_MM_PROTEIN_KINASE_C_BINDING	GO_MF_MM_PROTEIN_KINASE_C_BINDING	4/839	39/17799	0.110036	0.361024	0.308587	TOP2A/ITGAV/TIRAP/AKT1	4
GO_BP_MM_ATP_METABOLIC_PROCESS	GO_BP_MM_ATP_METABOLIC_PROCESS	3/839	25/17799	0.111398	0.361024	0.308587	AK4/FIGNL1/ATP1B3	3
GO_BP_MM_EMBRYONIC_PLACENTA_DEVELOPMENT	GO_BP_MM_EMBRYONIC_PLACENTA_DEVELOPMENT	3/839	25/17799	0.111398	0.361024	0.308587	CSF2/PDGFB/EGFR	3
GO_BP_MM_POSITIVE_REGULATION_OF_MITOSIS	GO_BP_MM_POSITIVE_REGULATION_OF_MITOSIS	3/839	25/17799	0.111398	0.361024	0.308587	NUSAP1/PDGFB/TNF	3
GO_BP_MM_REGULATION_OF_INFLAMMATORY_RESPONSE	GO_BP_MM_REGULATION_OF_INFLAMMATORY_RESPONSE	3/839	25/17799	0.111398	0.361024	0.308587	XCL1/SLC7A2/MAS1	3
GO_BP_MM_RESPONSE_TO_CORTICOSTERONE_STIMULUS	GO_BP_MM_RESPONSE_TO_CORTICOSTERONE_STIMULUS	3/839	25/17799	0.111398	0.361024	0.308587	SERPINA7/GPX3/CCNE1	3
GO_BP_MM_ATP_CATABOLIC_PROCESS	GO_BP_MM_ATP_CATABOLIC_PROCESS	6/839	70/17799	0.111679	0.361024	0.308587	TNNT2/BLM/RFC3/KIF20B/MYH9/IDE	6
GO_BP_MM_POSITIVE_REGULATION_OF_NEURON_DIFFERENTIATION	GO_BP_MM_POSITIVE_REGULATION_OF_NEURON_DIFFERENTIATION	6/839	70/17799	0.111679	0.361024	0.308587	ECT2/NBL1/CCL5/SOCS2/BNIP2/BDNF	6
GO_MF_MM_ACTIN_FILAMENT_BINDING	GO_MF_MM_ACTIN_FILAMENT_BINDING	6/839	70/17799	0.111679	0.361024	0.308587	CORO2A/LCP1/CORO1C/MYH9/EGFR/ACTN1	6
GO_BP_MM_LUNG_DEVELOPMENT	GO_BP_MM_LUNG_DEVELOPMENT	8/839	103/17799	0.112942	0.363708	0.310881	HEG1/MYCN/WNT7B/LIF/TIMELESS/CTGF/TGFBR1/MMP14	8
GO_CC_MM_ANCHORED_TO_MEMBRANE	GO_CC_MM_ANCHORED_TO_MEMBRANE	8/839	103/17799	0.112942	0.363708	0.310881	TNFRSF23/LY6D/BST1/MSLN/MFI2/CD14/VTCN1/PLAUR	8
GO_BP_MM_CELL_CYCLE_ARREST	GO_BP_MM_CELL_CYCLE_ARREST	7/839	87/17799	0.115878	0.372449	0.318353	CDKN3/VASH1/CDKN2B/MLF1/GAS2L3/THBS1/DST	7
GO_BP_MM_ACTIVATION_OF_JUN_KINASE_ACTIVITY	GO_BP_MM_ACTIVATION_OF_JUN_KINASE_ACTIVITY	3/839	26/17799	0.121745	0.375414	0.320886	WNT7A/WNT7B/TIRAP	3
GO_BP_MM_CELLULAR_RESPONSE_TO_UV	GO_BP_MM_CELLULAR_RESPONSE_TO_UV	3/839	26/17799	0.121745	0.375414	0.320886	AURKB/BAX/BAK1	3
GO_BP_MM_ODONTOGENESIS	GO_BP_MM_ODONTOGENESIS	3/839	26/17799	0.121745	0.375414	0.320886	WNT10A/CSF1/LAMB1	3
GO_CC_MM_RECEPTOR_COMPLEX	GO_CC_MM_RECEPTOR_COMPLEX	3/839	26/17799	0.121745	0.375414	0.320886	CSF1/TGFBR1/RIPK1	3
GO_MF_MM_4_IRON_4_SULFUR_CLUSTER_BINDING	GO_MF_MM_4_IRON_4_SULFUR_CLUSTER_BINDING	3/839	26/17799	0.121745	0.375414	0.320886	NUBP1/PRIM2/RSAD2	3
GO_BP_MM_ACUTE_INFLAMMATORY_RESPONSE	GO_BP_MM_ACUTE_INFLAMMATORY_RESPONSE	2/839	13/17799	0.12283	0.375414	0.320886	VCAM1/NUPR1	2
GO_BP_MM_BRANCHING_INVOLVED_IN_MAMMARY_GLAND_DUCT_MORPHOGENESIS	GO_BP_MM_BRANCHING_INVOLVED_IN_MAMMARY_GLAND_DUCT_MORPHOGENESIS	2/839	13/17799	0.12283	0.375414	0.320886	SLC12A2/CSF1	2
GO_BP_MM_CELL_PROLIFERATION_IN_FOREBRAIN	GO_BP_MM_CELL_PROLIFERATION_IN_FOREBRAIN	2/839	13/17799	0.12283	0.375414	0.320886	WNT7A/WNT7B	2
GO_BP_MM_CELLULAR_RESPONSE_TO_CYTOKINE_STIMULUS	GO_BP_MM_CELLULAR_RESPONSE_TO_CYTOKINE_STIMULUS	2/839	13/17799	0.12283	0.375414	0.320886	CCL5/PLSCR1	2
GO_BP_MM_CELLULAR_RESPONSE_TO_GLUCOSE_STARVATION	GO_BP_MM_CELLULAR_RESPONSE_TO_GLUCOSE_STARVATION	2/839	13/17799	0.12283	0.375414	0.320886	ASNS/PMAIP1	2
GO_BP_MM_CELLULAR_ZINC_ION_HOMEOSTASIS	GO_BP_MM_CELLULAR_ZINC_ION_HOMEOSTASIS	2/839	13/17799	0.12283	0.375414	0.320886	MT2/MT1	2
GO_BP_MM_EXCRETION	GO_BP_MM_EXCRETION	2/839	13/17799	0.12283	0.375414	0.320886	GUCA2B/KIRREL	2
GO_BP_MM_HEMOPOIETIC_PROGENITOR_CELL_DIFFERENTIATION	GO_BP_MM_HEMOPOIETIC_PROGENITOR_CELL_DIFFERENTIATION	2/839	13/17799	0.12283	0.375414	0.320886	FST/CDK6	2
GO_BP_MM_INNER_CELL_MASS_CELL_PROLIFERATION	GO_BP_MM_INNER_CELL_MASS_CELL_PROLIFERATION	2/839	13/17799	0.12283	0.375414	0.320886	GINS1/NCAPG2	2
GO_BP_MM_ISOTYPE_SWITCHING	GO_BP_MM_ISOTYPE_SWITCHING	2/839	13/17799	0.12283	0.375414	0.320886	EXO1/LIG4	2
GO_BP_MM_KERATINOCYTE_PROLIFERATION	GO_BP_MM_KERATINOCYTE_PROLIFERATION	2/839	13/17799	0.12283	0.375414	0.320886	FST/SFN	2
GO_BP_MM_MALE_MEIOSIS	GO_BP_MM_MALE_MEIOSIS	2/839	13/17799	0.12283	0.375414	0.320886	SUV39H2/ASZ1	2
GO_BP_MM_POSITIVE_REGULATION_OF_ATPASE_ACTIVITY	GO_BP_MM_POSITIVE_REGULATION_OF_ATPASE_ACTIVITY	2/839	13/17799	0.12283	0.375414	0.320886	TNNT2/DNAJC10	2
GO_BP_MM_POSITIVE_REGULATION_OF_CELL-MATRIX_ADHESION	GO_BP_MM_POSITIVE_REGULATION_OF_CELL-MATRIX_ADHESION	2/839	13/17799	0.12283	0.375414	0.320886	CDK6/CSF1	2
GO_BP_MM_POSITIVE_REGULATION_OF_CHEMOKINE_PRODUCTION	GO_BP_MM_POSITIVE_REGULATION_OF_CHEMOKINE_PRODUCTION	2/839	13/17799	0.12283	0.375414	0.320886	TNF/LBP	2
GO_BP_MM_POSITIVE_REGULATION_OF_SMOOTH_MUSCLE_CELL_MIGRATION	GO_BP_MM_POSITIVE_REGULATION_OF_SMOOTH_MUSCLE_CELL_MIGRATION	2/839	13/17799	0.12283	0.375414	0.320886	PDGFB/CCL5	2
GO_BP_MM_POSITIVE_REGULATION_OF_SYNAPTIC_TRANSMISSION	GO_BP_MM_POSITIVE_REGULATION_OF_SYNAPTIC_TRANSMISSION	2/839	13/17799	0.12283	0.375414	0.320886	CCL2/TNF	2
GO_BP_MM_REGULATION_OF_OSSIFICATION	GO_BP_MM_REGULATION_OF_OSSIFICATION	2/839	13/17799	0.12283	0.375414	0.320886	CSF1/RSAD2	2
GO_CC_MM_PERICENTRIOLAR_MATERIAL	GO_CC_MM_PERICENTRIOLAR_MATERIAL	2/839	13/17799	0.12283	0.375414	0.320886	TUBG1/CEP192	2
GO_CC_MM_PORE_COMPLEX	GO_CC_MM_PORE_COMPLEX	2/839	13/17799	0.12283	0.375414	0.320886	BAX/BAK1	2
GO_MF_MM_CHEMOATTRACTANT_ACTIVITY	GO_MF_MM_CHEMOATTRACTANT_ACTIVITY	2/839	13/17799	0.12283	0.375414	0.320886	CCL5/HMGB2	2
GO_MF_MM_SODIUM_CHANNEL_ACTIVITY	GO_MF_MM_SODIUM_CHANNEL_ACTIVITY	2/839	13/17799	0.12283	0.375414	0.320886	SLC4A11/SCNN1A	2
GO_BP_MM_HAIR_FOLLICLE_DEVELOPMENT	GO_BP_MM_HAIR_FOLLICLE_DEVELOPMENT	4/839	41/17799	0.126135	0.382969	0.327344	WNT10A/VANGL2/EGFR/ZDHHC21	4
GO_BP_MM_POSITIVE_REGULATION_OF_T_CELL_PROLIFERATION	GO_BP_MM_POSITIVE_REGULATION_OF_T_CELL_PROLIFERATION	4/839	41/17799	0.126135	0.382969	0.327344	JAK3/VCAM1/CCL5/IL23A	4
GO_MF_MM_CHAPERONE_BINDING	GO_MF_MM_CHAPERONE_BINDING	4/839	41/17799	0.126135	0.382969	0.327344	FGB/TFRC/BAK1/DNAJC10	4
GO_BP_MM_CHROMATIN_MODIFICATION	GO_BP_MM_CHROMATIN_MODIFICATION	7/839	89/17799	0.126441	0.382969	0.327344	ASF1B/RBL1/CBX2/DNMT1/DEK/WHSC1/FOXA3	7
GO_CC_MM_NUCLEAR_ENVELOPE	GO_CC_MM_NUCLEAR_ENVELOPE	7/839	89/17799	0.126441	0.382969	0.327344	S100A6/CENPF/NRM/LMNB1/LBR/NUP210/BNIP2	7
GO_BP_MM_OSSIFICATION	GO_BP_MM_OSSIFICATION	6/839	73/17799	0.129361	0.391107	0.334301	CSF1/TNFRSF11A/PDLIM7/CTGF/RSAD2/MMP14	6
GO_BP_MM_ODONTOGENESIS_OF_DENTIN-CONTAINING_TOOTH	GO_BP_MM_ODONTOGENESIS_OF_DENTIN-CONTAINING_TOOTH	5/839	57/17799	0.130058	0.39251	0.335499	FST/WNT7B/ADM/CAR2/BAX	5
GO_BP_MM_CELL_AGING	GO_BP_MM_CELL_AGING	3/839	27/17799	0.132427	0.3954	0.33797	CDK1/ICAM1/MIF	3
GO_BP_MM_FERTILIZATION	GO_BP_MM_FERTILIZATION	3/839	27/17799	0.132427	0.3954	0.33797	ITGAV/AAAS/BAX	3
GO_BP_MM_HETEROPHILIC_CELL-CELL_ADHESION	GO_BP_MM_HETEROPHILIC_CELL-CELL_ADHESION	3/839	27/17799	0.132427	0.3954	0.33797	VCAM1/MCAM/LGALS1	3
GO_CC_MM_CELL_BODY	GO_CC_MM_CELL_BODY	3/839	27/17799	0.132427	0.3954	0.33797	TUBB5/TUBB4B/ACOT7	3
GO_CC_MM_INTEGRIN_COMPLEX	GO_CC_MM_INTEGRIN_COMPLEX	3/839	27/17799	0.132427	0.3954	0.33797	ITGAV/MYH9/ITGB6	3
GO_MF_MM_EUKARYOTIC_CELL_SURFACE_BINDING	GO_MF_MM_EUKARYOTIC_CELL_SURFACE_BINDING	3/839	27/17799	0.132427	0.3954	0.33797	FGB/PDGFB/THBS1	3
GO_BP_MM_CELL_GROWTH	GO_BP_MM_CELL_GROWTH	4/839	42/17799	0.134535	0.399563	0.341528	EMP1/PDGFB/NUPR1/NUBP1	4
GO_BP_MM_MEMORY	GO_BP_MM_MEMORY	4/839	42/17799	0.134535	0.399563	0.341528	CNR1/PTGS2/IL1RN/S100B	4
GO_MF_MM_KINASE_BINDING	GO_MF_MM_KINASE_BINDING	4/839	42/17799	0.134535	0.399563	0.341528	CDC6/NIN/TNFAIP3/PIP5K1A	4
GO_BP_MM_ACTIN_FILAMENT-BASED_MOVEMENT	GO_BP_MM_ACTIN_FILAMENT-BASED_MOVEMENT	2/839	14/17799	0.139013	0.403594	0.344973	MYO1B/MYH9	2
GO_BP_MM_HOMEOSTASIS_OF_NUMBER_OF_CELLS	GO_BP_MM_HOMEOSTASIS_OF_NUMBER_OF_CELLS	2/839	14/17799	0.139013	0.403594	0.344973	BAX/BAK1	2
GO_BP_MM_NEGATIVE_REGULATION_OF_MICROTUBULE_DEPOLYMERIZATION	GO_BP_MM_NEGATIVE_REGULATION_OF_MICROTUBULE_DEPOLYMERIZATION	2/839	14/17799	0.139013	0.403594	0.344973	CKAP2/ARHGEF2	2
GO_BP_MM_POSITIVE_REGULATION_OF_RELEASE_OF_SEQUESTERED_CALCIUM_ION_INTO_CYTOSOL	GO_BP_MM_POSITIVE_REGULATION_OF_RELEASE_OF_SEQUESTERED_CALCIUM_ION_INTO_CYTOSOL	2/839	14/17799	0.139013	0.403594	0.344973	XCL1/BAX	2
GO_BP_MM_REGULATION_OF_ACTIN_FILAMENT_POLYMERIZATION	GO_BP_MM_REGULATION_OF_ACTIN_FILAMENT_POLYMERIZATION	2/839	14/17799	0.139013	0.403594	0.344973	ARPC1B/PAK3	2
GO_BP_MM_REGULATION_OF_ENDOCYTOSIS	GO_BP_MM_REGULATION_OF_ENDOCYTOSIS	2/839	14/17799	0.139013	0.403594	0.344973	EPN2/EHD4	2
GO_BP_MM_REGULATION_OF_PEPTIDYL-TYROSINE_PHOSPHORYLATION	GO_BP_MM_REGULATION_OF_PEPTIDYL-TYROSINE_PHOSPHORYLATION	2/839	14/17799	0.139013	0.403594	0.344973	PDGFB/EGFR	2
GO_BP_MM_RESPONSE_TO_PH	GO_BP_MM_RESPONSE_TO_PH	2/839	14/17799	0.139013	0.403594	0.344973	PAM/CAR2	2
GO_BP_MM_ZINC_ION_TRANSMEMBRANE_TRANSPORT	GO_BP_MM_ZINC_ION_TRANSMEMBRANE_TRANSPORT	2/839	14/17799	0.139013	0.403594	0.344973	SLC11A2/SLC39A1	2
GO_MF_MM_CYCLIN_BINDING	GO_MF_MM_CYCLIN_BINDING	2/839	14/17799	0.139013	0.403594	0.344973	CDK1/CDK6	2
GO_MF_MM_GLUTATHIONE_PEROXIDASE_ACTIVITY	GO_MF_MM_GLUTATHIONE_PEROXIDASE_ACTIVITY	2/839	14/17799	0.139013	0.403594	0.344973	GPX8/GPX3	2
GO_MF_MM_HSP70_PROTEIN_BINDING	GO_MF_MM_HSP70_PROTEIN_BINDING	2/839	14/17799	0.139013	0.403594	0.344973	CDK1/TFRC	2
GO_MF_MM_ZINC_ION_TRANSMEMBRANE_TRANSPORTER_ACTIVITY	GO_MF_MM_ZINC_ION_TRANSMEMBRANE_TRANSPORTER_ACTIVITY	2/839	14/17799	0.139013	0.403594	0.344973	SLC11A2/SLC39A1	2
GO_BP_MM_REGULATION_OF_BLOOD_PRESSURE	GO_BP_MM_REGULATION_OF_BLOOD_PRESSURE	4/839	43/17799	0.143155	0.411418	0.351661	PTGS2/ACE/HMOX1/CYBA	4
GO_CC_MM_RUFFLE_MEMBRANE	GO_CC_MM_RUFFLE_MEMBRANE	4/839	43/17799	0.143155	0.411418	0.351661	LCP1/TWF1/PIP5K1A/ARHGEF2	4
GO_MF_MM_DAMAGED_DNA_BINDING	GO_MF_MM_DAMAGED_DNA_BINDING	4/839	43/17799	0.143155	0.411418	0.351661	NEIL3/BRCA1/RAD51/HMGB2	4
GO_BP_MM_PEPTIDYL-THREONINE_PHOSPHORYLATION	GO_BP_MM_PEPTIDYL-THREONINE_PHOSPHORYLATION	3/839	28/17799	0.143421	0.411418	0.351661	PBK/CHEK1/TGFBR1	3
GO_BP_MM_PHOSPHOLIPID_BIOSYNTHETIC_PROCESS	GO_BP_MM_PHOSPHOLIPID_BIOSYNTHETIC_PROCESS	3/839	28/17799	0.143421	0.411418	0.351661	LPCAT4/PGS1/PIP5K1A	3
GO_MF_MM_GLUTATHIONE_TRANSFERASE_ACTIVITY	GO_MF_MM_GLUTATHIONE_TRANSFERASE_ACTIVITY	3/839	28/17799	0.143421	0.411418	0.351661	BC021614/GSTO1/GSTA4	3
GO_MF_MM_TUMOR_NECROSIS_FACTOR_RECEPTOR_BINDING	GO_MF_MM_TUMOR_NECROSIS_FACTOR_RECEPTOR_BINDING	3/839	28/17799	0.143421	0.411418	0.351661	TNF/LTB/NUCB2	3
GO_BP_MM_RESPONSE_TO_CALCIUM_ION	GO_BP_MM_RESPONSE_TO_CALCIUM_ION	5/839	59/17799	0.144447	0.412952	0.352973	FGB/TNNT2/THBS1/CALM1/ITPR3	5
GO_CC_MM_ENDOMEMBRANE_SYSTEM	GO_CC_MM_ENDOMEMBRANE_SYSTEM	5/839	59/17799	0.144447	0.412952	0.352973	JAK3/IL3RA/SLC11A2/CDC42EP2/RC3H2	5
GO_MF_MM_BINDING	GO_MF_MM_BINDING	22/839	367/17799	0.148163	0.422517	0.361148	CLHC1/NCAPD2/C330027C09RIK/KPNA2/FMNL3/RRP12/NCAPG2/NCBP1/INF2/KPNA1/NCAPD3/DOCK5/HSF2BP/HEATR1/FHOD1/BZW2/IPO9/BZW1/PLAA/USO1/PSMD2/ITPR3	22
GO_BP_MM_POSITIVE_REGULATION_OF_ERK1_AND_ERK2_CASCADE	GO_BP_MM_POSITIVE_REGULATION_OF_ERK1_AND_ERK2_CASCADE	6/839	76/17799	0.148296	0.422517	0.361148	CD44/PDGFB/FLT4/TIRAP/CTGF/MIF	6
GO_MF_MM_PROTEIN_SERINE_THREONINE_KINASE_ACTIVITY	GO_MF_MM_PROTEIN_SERINE_THREONINE_KINASE_ACTIVITY	22/839	368/17799	0.151011	0.424671	0.36299	MELK/PLK1/PBK/NEK2/BUB1/AURKB/DBF4/CHEK1/AURKA/PLK4/BUB1B/PASK/MASTL/STK35/TGFBR1/SLK/STK25/PAK3/NEK7/SIK1/AKT1/RIPK1	22
GO_BP_MM_RESPONSE_TO_HYDROGEN_PEROXIDE	GO_BP_MM_RESPONSE_TO_HYDROGEN_PEROXIDE	4/839	44/17799	0.151987	0.424671	0.36299	OLR1/CDK1/HMOX1/BAK1	4
GO_BP_MM_RIBOSOME_BIOGENESIS	GO_BP_MM_RIBOSOME_BIOGENESIS	4/839	44/17799	0.151987	0.424671	0.36299	2410016O06RIK/NOP56/IPO9/GAR1	4
GO_BP_MM_TRANSCRIPTION_FROM_RNA_POLYMERASE_II_PROMOTER	GO_BP_MM_TRANSCRIPTION_FROM_RNA_POLYMERASE_II_PROMOTER	8/839	111/17799	0.153167	0.424671	0.36299	BHLHE41/FOXM1/ETS1/AHR/GTF2F2/TAF4B/GTF2H2/STAT5A	8
GO_BP_MM_NEURON_APOPTOTIC_PROCESS	GO_BP_MM_NEURON_APOPTOTIC_PROCESS	3/839	29/17799	0.154704	0.424671	0.36299	APAF1/LIG4/BAX	3
GO_BP_MM_POSITIVE_REGULATION_OF_CYSTEINE-TYPE_ENDOPEPTIDASE_ACTIVITY_INVOLVED_IN_APOPTOTIC_PROCESS	GO_BP_MM_POSITIVE_REGULATION_OF_CYSTEINE-TYPE_ENDOPEPTIDASE_ACTIVITY_INVOLVED_IN_APOPTOTIC_PROCESS	3/839	29/17799	0.154704	0.424671	0.36299	FOXQ1/CTGF/PMAIP1	3
GO_CC_MM_BRUSH_BORDER	GO_CC_MM_BRUSH_BORDER	3/839	29/17799	0.154704	0.424671	0.36299	SLC11A2/MYO1B/RGS19	3
GO_CC_MM_INTERNAL_SIDE_OF_PLASMA_MEMBRANE	GO_CC_MM_INTERNAL_SIDE_OF_PLASMA_MEMBRANE	3/839	29/17799	0.154704	0.424671	0.36299	MSN/GEM/LDLRAP1	3
GO_BP_MM_DNA_METHYLATION	GO_BP_MM_DNA_METHYLATION	2/839	15/17799	0.15562	0.424671	0.36299	HELLS/DNMT1	2
GO_BP_MM_ESTABLISHMENT_OR_MAINTENANCE_OF_CELL_POLARITY	GO_BP_MM_ESTABLISHMENT_OR_MAINTENANCE_OF_CELL_POLARITY	2/839	15/17799	0.15562	0.424671	0.36299	ACTR2/STK25	2
GO_BP_MM_NEGATIVE_REGULATION_OF_MEGAKARYOCYTE_DIFFERENTIATION	GO_BP_MM_NEGATIVE_REGULATION_OF_MEGAKARYOCYTE_DIFFERENTIATION	2/839	15/17799	0.15562	0.424671	0.36299	HIST1H4I/PF4	2
GO_BP_MM_NEGATIVE_REGULATION_OF_MYELOID_CELL_DIFFERENTIATION	GO_BP_MM_NEGATIVE_REGULATION_OF_MYELOID_CELL_DIFFERENTIATION	2/839	15/17799	0.15562	0.424671	0.36299	CDK6/HMGB3	2
GO_BP_MM_POSITIVE_REGULATION_OF_CARDIAC_MUSCLE_CELL_PROLIFERATION	GO_BP_MM_POSITIVE_REGULATION_OF_CARDIAC_MUSCLE_CELL_PROLIFERATION	2/839	15/17799	0.15562	0.424671	0.36299	CCNB1/CDK1	2
GO_BP_MM_POSITIVE_REGULATION_OF_FILOPODIUM_ASSEMBLY	GO_BP_MM_POSITIVE_REGULATION_OF_FILOPODIUM_ASSEMBLY	2/839	15/17799	0.15562	0.424671	0.36299	TGFBR1/RALA	2
GO_BP_MM_REGULATION_OF_PROTEIN_CATABOLIC_PROCESS	GO_BP_MM_REGULATION_OF_PROTEIN_CATABOLIC_PROCESS	2/839	15/17799	0.15562	0.424671	0.36299	SERPINB1A/PSMD2	2
GO_BP_MM_RESPONSE_TO_FOOD	GO_BP_MM_RESPONSE_TO_FOOD	2/839	15/17799	0.15562	0.424671	0.36299	HSD11B2/AKT1	2
GO_BP_MM_RESPONSE_TO_IRON_ION	GO_BP_MM_RESPONSE_TO_IRON_ION	2/839	15/17799	0.15562	0.424671	0.36299	TFRC/SLC11A2	2
GO_BP_MM_STRIATED_MUSCLE_CELL_DIFFERENTIATION	GO_BP_MM_STRIATED_MUSCLE_CELL_DIFFERENTIATION	2/839	15/17799	0.15562	0.424671	0.36299	BNIP2/AKT1	2
GO_MF_MM_ALPHA-TUBULIN_BINDING	GO_MF_MM_ALPHA-TUBULIN_BINDING	2/839	15/17799	0.15562	0.424671	0.36299	RACGAP1/ARL4C	2
GO_MF_MM_CARBONATE_DEHYDRATASE_ACTIVITY	GO_MF_MM_CARBONATE_DEHYDRATASE_ACTIVITY	2/839	15/17799	0.15562	0.424671	0.36299	CAR9/CAR2	2
GO_MF_MM_CELL_SURFACE_BINDING	GO_MF_MM_CELL_SURFACE_BINDING	2/839	15/17799	0.15562	0.424671	0.36299	PDGFB/ICAM1	2
GO_MF_MM_LOW-DENSITY_LIPOPROTEIN_PARTICLE_RECEPTOR_BINDING	GO_MF_MM_LOW-DENSITY_LIPOPROTEIN_PARTICLE_RECEPTOR_BINDING	2/839	15/17799	0.15562	0.424671	0.36299	PCSK9/LDLRAP1	2
GO_MF_MM_PHOSPHATIDYLINOSITOL-3-PHOSPHATE_BINDING	GO_MF_MM_PHOSPHATIDYLINOSITOL-3-PHOSPHATE_BINDING	2/839	15/17799	0.15562	0.424671	0.36299	PHLDA3/SH3PXD2B	2
GO_MF_MM_PHOSPHATIDYLSERINE_BINDING	GO_MF_MM_PHOSPHATIDYLSERINE_BINDING	2/839	15/17799	0.15562	0.424671	0.36299	AXL/THBS1	2
GO_MF_MM_PHOSPHOLIPASE_BINDING	GO_MF_MM_PHOSPHOLIPASE_BINDING	2/839	15/17799	0.15562	0.424671	0.36299	LMNB1/CALM1	2
GO_MF_MM_RNA_POLYMERASE_II_CARBOXY-TERMINAL_DOMAIN_KINASE_ACTIVITY	GO_MF_MM_RNA_POLYMERASE_II_CARBOXY-TERMINAL_DOMAIN_KINASE_ACTIVITY	2/839	15/17799	0.15562	0.424671	0.36299	CDK1/GTF2H2	2
GO_CC_MM_MEMBRANE_FRACTION	GO_CC_MM_MEMBRANE_FRACTION	23/839	389/17799	0.156617	0.4267	0.364724	RGS4/P2RX2/CCNB1/SCN8A/WHRN/CCNB2/SERPINE2/PAM/CD38/PLCG2/ACE/DYNLL1/ABCC4/SCNN1A/ABCG2/BAK1/MTMR7/LAMC2/RGS19/AKT1/IGF2R/RC3H2/RDH10	23
GO_BP_MM_ACTIVATION_OF_MAPK_ACTIVITY	GO_BP_MM_ACTIVATION_OF_MAPK_ACTIVITY	5/839	61/17799	0.159485	0.43381	0.370801	IQGAP3/TNF/MUC20/THBS1/PAK3	5
GO_BP_MM_POSITIVE_REGULATION_OF_PROTEIN_KINASE_ACTIVITY	GO_BP_MM_POSITIVE_REGULATION_OF_PROTEIN_KINASE_ACTIVITY	4/839	45/17799	0.161018	0.436568	0.373158	LRP8/CENPE/CSF1/CDC25B	4
GO_MF_MM_COENZYME_BINDING	GO_MF_MM_COENZYME_BINDING	4/839	45/17799	0.161018	0.436568	0.373158	FAR1/RDH13/GALE/GCLC	4
GO_CC_MM_COLLAGEN	GO_CC_MM_COLLAGEN	6/839	78/17799	0.161573	0.437365	0.373839	C1QTNF6/COL16A1/COL4A2/SFTPD/COL4A6/COL4A1	6
GO_BP_MM_BROWN_FAT_CELL_DIFFERENTIATION	GO_BP_MM_BROWN_FAT_CELL_DIFFERENTIATION	3/839	30/17799	0.166252	0.447867	0.382817	PTGS2/LAMB3/LRG1	3
GO_BP_MM_POSITIVE_REGULATION_OF_JUN_KINASE_ACTIVITY	GO_BP_MM_POSITIVE_REGULATION_OF_JUN_KINASE_ACTIVITY	3/839	30/17799	0.166252	0.447867	0.382817	IL1RN/VANGL2/TNFRSF11A	3
GO_MF_MM_DNA-DEPENDENT_ATPASE_ACTIVITY	GO_MF_MM_DNA-DEPENDENT_ATPASE_ACTIVITY	3/839	30/17799	0.166252	0.447867	0.382817	TOP2A/RAD51/GTF2H2	3
GO_CC_MM_MITOCHONDRIAL_OUTER_MEMBRANE	GO_CC_MM_MITOCHONDRIAL_OUTER_MEMBRANE	7/839	96/17799	0.166989	0.448356	0.383234	HK2/MUC20/RAB11FIP5/TSPO/BAX/RSAD2/ACSL4	7
GO_BP_MM_CELL-CELL_SIGNALING	GO_BP_MM_CELL-CELL_SIGNALING	5/839	62/17799	0.167233	0.448356	0.383234	WNT10A/WNT7A/DLGAP5/WNT7B/CCL5	5
GO_MF_MM_PROTEIN_TRANSPORTER_ACTIVITY	GO_MF_MM_PROTEIN_TRANSPORTER_ACTIVITY	5/839	62/17799	0.167233	0.448356	0.383234	KPNA2/KPNA1/COX18/IPO9/USO1	5
GO_BP_MM_SPERMATOGENESIS	GO_BP_MM_SPERMATOGENESIS	16/839	260/17799	0.167951	0.449562	0.384265	RAD18/CNR1/CCNB1/BARD1/RACGAP1/AXL/E2F1/TUBD1/MAS1/TRIP13/ASZ1/HMGB2/BAX/FOXA3/GSR/SBF1	16
GO_BP_MM_CELLULAR_RESPONSE_TO_STRESS	GO_BP_MM_CELLULAR_RESPONSE_TO_STRESS	2/839	16/17799	0.172576	0.455417	0.38927	KRT20/4632434I11RIK	2
GO_BP_MM_DECIDUALIZATION	GO_BP_MM_DECIDUALIZATION	2/839	16/17799	0.172576	0.455417	0.38927	PTGS2/LIF	2
GO_BP_MM_EMBRYONIC_HEMOPOIESIS	GO_BP_MM_EMBRYONIC_HEMOPOIESIS	2/839	16/17799	0.172576	0.455417	0.38927	RUNX1/KITL	2
GO_BP_MM_ENDOTHELIAL_CELL_MIGRATION	GO_BP_MM_ENDOTHELIAL_CELL_MIGRATION	2/839	16/17799	0.172576	0.455417	0.38927	ITGAV/TGFBR1	2
GO_BP_MM_POSITIVE_REGULATION_OF_RAS_PROTEIN_SIGNAL_TRANSDUCTION	GO_BP_MM_POSITIVE_REGULATION_OF_RAS_PROTEIN_SIGNAL_TRANSDUCTION	2/839	16/17799	0.172576	0.455417	0.38927	CSF1/KITL	2
GO_BP_MM_POSITIVE_REGULATION_OF_T_CELL_MEDIATED_CYTOTOXICITY	GO_BP_MM_POSITIVE_REGULATION_OF_T_CELL_MEDIATED_CYTOTOXICITY	2/839	16/17799	0.172576	0.455417	0.38927	XCL1/IL23A	2
GO_BP_MM_RESPONSE_TO_ATP	GO_BP_MM_RESPONSE_TO_ATP	2/839	16/17799	0.172576	0.455417	0.38927	P2RX2/PLCG2	2
GO_BP_MM_RESPONSE_TO_VITAMIN_A	GO_BP_MM_RESPONSE_TO_VITAMIN_A	2/839	16/17799	0.172576	0.455417	0.38927	SERPINA7/RBP1	2
GO_MF_MM_NUCLEASE_ACTIVITY	GO_MF_MM_NUCLEASE_ACTIVITY	2/839	16/17799	0.172576	0.455417	0.38927	EXO1/FEN1	2
GO_BP_MM_NEGATIVE_REGULATION_OF_TRANSCRIPTION_FROM_RNA_POLYMERASE_II_PROMOTER	GO_BP_MM_NEGATIVE_REGULATION_OF_TRANSCRIPTION_FROM_RNA_POLYMERASE_II_PROMOTER	28/839	492/17799	0.17499	0.460539	0.393647	FST/BHLHE41/FHL2/LRP8/FOXM1/WNT10A/PLK1/WNT7A/AURKB/E2F1/FOXQ1/TNF/NRARP/RBL1/CBX2/WNT7B/TIMELESS/AHR/MAF/FOXN2/WHSC1/FOXA3/PCNA/TFCP2L1/SIK1/YBX1/UXT/ZFP568	28
GO_BP_MM_CELL_REDOX_HOMEOSTASIS	GO_BP_MM_CELL_REDOX_HOMEOSTASIS	5/839	63/17799	0.175126	0.460539	0.393647	GSR/GLRX/DNAJC10/TXNRD1/GCLC	5
GO_BP_MM_CELL-CELL_ADHESION	GO_BP_MM_CELL-CELL_ADHESION	6/839	80/17799	0.175339	0.460539	0.393647	ADAM8/FBLIM1/MYH9/EGFR/ICAM1/KIRREL	6
GO_BP_MM_PHAGOCYTOSIS	GO_BP_MM_PHAGOCYTOSIS	3/839	31/17799	0.178043	0.464015	0.396619	AXL/ANXA3/CORO1C	3
GO_BP_MM_POSITIVE_REGULATION_OF_CELL-SUBSTRATE_ADHESION	GO_BP_MM_POSITIVE_REGULATION_OF_CELL-SUBSTRATE_ADHESION	3/839	31/17799	0.178043	0.464015	0.396619	NID1/FBLN2/THBS1	3
GO_BP_MM_RESPONSE_TO_COLD	GO_BP_MM_RESPONSE_TO_COLD	3/839	31/17799	0.178043	0.464015	0.396619	ADM/RBM3/CXCL10	3
GO_BP_MM_TISSUE_DEVELOPMENT	GO_BP_MM_TISSUE_DEVELOPMENT	3/839	31/17799	0.178043	0.464015	0.396619	FOXM1/POSTN/FOXN2	3
GO_BP_MM_VASCULATURE_DEVELOPMENT	GO_BP_MM_VASCULATURE_DEVELOPMENT	3/839	31/17799	0.178043	0.464015	0.396619	HEG1/WNT7B/FLT4	3
GO_BP_MM_POSITIVE_REGULATION_OF_NEURON_PROJECTION_DEVELOPMENT	GO_BP_MM_POSITIVE_REGULATION_OF_NEURON_PROJECTION_DEVELOPMENT	4/839	47/17799	0.179641	0.466014	0.398328	CNR1/SERPINE2/LIF/HAP1	4
GO_BP_MM_RESPONSE_TO_HEAT	GO_BP_MM_RESPONSE_TO_HEAT	4/839	47/17799	0.179641	0.466014	0.398328	CCL2/MTHFD2/CD14/GCLC	4
GO_BP_MM_SKIN_DEVELOPMENT	GO_BP_MM_SKIN_DEVELOPMENT	4/839	47/17799	0.179641	0.466014	0.398328	WNT10A/GJB3/LTB/SFN	4
GO_BP_MM_INTRACELLULAR_SIGNAL_TRANSDUCTION	GO_BP_MM_INTRACELLULAR_SIGNAL_TRANSDUCTION	16/839	264/17799	0.182921	0.473676	0.404876	ECT2/RACGAP1/DEPDC5/PLCG2/PLCXD2/SOCS2/HMOX1/PLEKHM3/PLEK2/SH3BP5/SPSB1/CTGF/ARHGEF2/ASB6/WSB2/AKT1	16
GO_BP_MM_CELLULAR_CALCIUM_ION_HOMEOSTASIS	GO_BP_MM_CELLULAR_CALCIUM_ION_HOMEOSTASIS	5/839	64/17799	0.183158	0.473676	0.404876	CCL2/CD40/CCL5/S100B/NUCB2	5
GO_BP_MM_HIPPOCAMPUS_DEVELOPMENT	GO_BP_MM_HIPPOCAMPUS_DEVELOPMENT	4/839	48/17799	0.189211	0.483329	0.413128	LRP8/MAS1/ANXA3/PTPRS	4
GO_BP_MM_B_CELL_HOMEOSTASIS	GO_BP_MM_B_CELL_HOMEOSTASIS	2/839	17/17799	0.189812	0.483329	0.413128	BAX/BAK1	2
GO_BP_MM_COLLAGEN_CATABOLIC_PROCESS	GO_BP_MM_COLLAGEN_CATABOLIC_PROCESS	2/839	17/17799	0.189812	0.483329	0.413128	MMP7/MMP14	2
GO_BP_MM_NEGATIVE_REGULATION_OF_CYCLIN-DEPENDENT_PROTEIN_KINASE_ACTIVITY	GO_BP_MM_NEGATIVE_REGULATION_OF_CYCLIN-DEPENDENT_PROTEIN_KINASE_ACTIVITY	2/839	17/17799	0.189812	0.483329	0.413128	PLK1/TNFAIP3	2
GO_BP_MM_NEGATIVE_REGULATION_OF_I-KAPPAB_KINASE_NF-KAPPAB_CASCADE	GO_BP_MM_NEGATIVE_REGULATION_OF_I-KAPPAB_KINASE_NF-KAPPAB_CASCADE	2/839	17/17799	0.189812	0.483329	0.413128	NFKBID/TNFAIP3	2
GO_BP_MM_POSITIVE_REGULATION_OF_AXONOGENESIS	GO_BP_MM_POSITIVE_REGULATION_OF_AXONOGENESIS	2/839	17/17799	0.189812	0.483329	0.413128	METRN/STK25	2
GO_CC_MM_BASAL_LAMINA	GO_CC_MM_BASAL_LAMINA	2/839	17/17799	0.189812	0.483329	0.413128	NID1/LAMB1	2
GO_MF_MM_FIBRONECTIN_BINDING	GO_MF_MM_FIBRONECTIN_BINDING	2/839	17/17799	0.189812	0.483329	0.413128	THBS1/CTGF	2
GO_BP_MM_POSITIVE_REGULATION_OF_PROTEASOMAL_UBIQUITIN-DEPENDENT_PROTEIN_CATABOLIC_PROCESS	GO_BP_MM_POSITIVE_REGULATION_OF_PROTEASOMAL_UBIQUITIN-DEPENDENT_PROTEIN_CATABOLIC_PROCESS	3/839	32/17799	0.190054	0.483329	0.413128	PLK1/AKT1/GCLC	3
GO_BP_MM_RESPONSE_TO_NICOTINE	GO_BP_MM_RESPONSE_TO_NICOTINE	3/839	32/17799	0.190054	0.483329	0.413128	CNR1/DHFR/HMOX1	3
GO_BP_MM_T_CELL_DIFFERENTIATION_IN_THYMUS	GO_BP_MM_T_CELL_DIFFERENTIATION_IN_THYMUS	3/839	32/17799	0.190054	0.483329	0.413128	CDK6/LIG4/STAT5A	3
GO_BP_MM_NEGATIVE_REGULATION_OF_ENDOPEPTIDASE_ACTIVITY	GO_BP_MM_NEGATIVE_REGULATION_OF_ENDOPEPTIDASE_ACTIVITY	5/839	65/17799	0.191323	0.485088	0.414631	SERPINA7/SERPINA1B/SERPINE1/SERPINB1A/SERPINB6B	5
GO_CC_MM_PML_BODY	GO_CC_MM_PML_BODY	5/839	65/17799	0.191323	0.485088	0.414631	BLM/TOPBP1/TOP3A/RAD51/SMC5	5
GO_CC_MM_APICAL_PLASMA_MEMBRANE	GO_CC_MM_APICAL_PLASMA_MEMBRANE	13/839	210/17799	0.192995	0.488399	0.417461	SLC7A5/MSN/MUC20/SLC12A2/VANGL2/CACNB3/SLC11A2/CLDN4/SCNN1A/ABCG2/CYBA/TGFBR1/CIB1	13
GO_MF_MM_SERINE-TYPE_ENDOPEPTIDASE_INHIBITOR_ACTIVITY	GO_MF_MM_SERINE-TYPE_ENDOPEPTIDASE_INHIBITOR_ACTIVITY	8/839	118/17799	0.193209	0.488399	0.417461	SERPINA7/SLPI/SERPINE2/SERPINA1B/SERPINE1/SERPINB1A/SERPINB6B/WFDC2	8
GO_MF_MM_MAGNESIUM_ION_BINDING	GO_MF_MM_MAGNESIUM_ION_BINDING	11/839	173/17799	0.194159	0.490062	0.418883	GEM/MTHFD2/FEN1/FIGNL1/PPA1/DCK/NME1/PDXK/TESC/SIK1/GCLC	11
GO_BP_MM_EXTRACELLULAR_MATRIX_ORGANIZATION	GO_BP_MM_EXTRACELLULAR_MATRIX_ORGANIZATION	6/839	83/17799	0.196838	0.49608	0.424026	NID1/TNF/POSTN/LGALS3/PXDN/COL4A6	6
GO_BP_MM_CYTOSKELETON_ORGANIZATION	GO_BP_MM_CYTOSKELETON_ORGANIZATION	7/839	101/17799	0.199029	0.500075	0.427441	CCL7/CCL2/FMNL3/RP2H/PFN1/AKT1/DST	7
GO_BP_MM_MAPK_CASCADE	GO_BP_MM_MAPK_CASCADE	5/839	66/17799	0.199613	0.500075	0.427441	CCL2/MAPK11/TNF/CCL5/PAK3	5
GO_BP_MM_POSITIVE_REGULATION_OF_MAPK_CASCADE	GO_BP_MM_POSITIVE_REGULATION_OF_MAPK_CASCADE	5/839	66/17799	0.199613	0.500075	0.427441	IGFBP4/PDGFB/LIF/FLT4/BNIP2	5
GO_MF_MM_TRANSLATION_INITIATION_FACTOR_ACTIVITY	GO_MF_MM_TRANSLATION_INITIATION_FACTOR_ACTIVITY	5/839	66/17799	0.199613	0.500075	0.427441	EIF6/TRMT6/EIF4A1/EIF5B/EIF2S1	5
GO_BP_MM_BEHAVIOR	GO_BP_MM_BEHAVIOR	3/839	33/17799	0.202263	0.502753	0.42973	CNR1/BDNF/GLS	3
GO_BP_MM_BRANCHING_MORPHOGENESIS_OF_A_TUBE	GO_BP_MM_BRANCHING_MORPHOGENESIS_OF_A_TUBE	3/839	33/17799	0.202263	0.502753	0.42973	MYCN/TIMELESS/MMP14	3
GO_BP_MM_POSITIVE_REGULATION_OF_TRANSLATION	GO_BP_MM_POSITIVE_REGULATION_OF_TRANSLATION	3/839	33/17799	0.202263	0.502753	0.42973	RBM3/THBS1/KRT17	3
GO_CC_MM_DENDRITIC_SHAFT	GO_CC_MM_DENDRITIC_SHAFT	3/839	33/17799	0.202263	0.502753	0.42973	WHRN/ARHGEF2/KIRREL	3
GO_BP_MM_RESPONSE_TO_NUTRIENT	GO_BP_MM_RESPONSE_TO_NUTRIENT	6/839	84/17799	0.204215	0.502753	0.42973	CNR1/BRCA1/VCAM1/TFRC/AACS/ACSL4	6
GO_CC_MM_SECRETORY_GRANULE	GO_CC_MM_SECRETORY_GRANULE	6/839	84/17799	0.204215	0.502753	0.42973	PLAT/TNF/TFF3/PAM/THBS1/ACTN1	6
GO_MF_MM_LIPID_BINDING	GO_MF_MM_LIPID_BINDING	7/839	102/17799	0.20571	0.502753	0.42973	MELK/PTGS2/FABP5/SEC14L2/BAX/EPN2/LBP	7
GO_BP_MM_DIGESTIVE_TRACT_MORPHOGENESIS	GO_BP_MM_DIGESTIVE_TRACT_MORPHOGENESIS	2/839	18/17799	0.207262	0.502753	0.42973	VANGL2/EGFR	2
GO_BP_MM_MEMBRANE_PROTEIN_ECTODOMAIN_PROTEOLYSIS	GO_BP_MM_MEMBRANE_PROTEIN_ECTODOMAIN_PROTEOLYSIS	2/839	18/17799	0.207262	0.502753	0.42973	BACE2/MYH9	2
GO_BP_MM_NEGATIVE_REGULATION_OF_INTERLEUKIN-6_PRODUCTION	GO_BP_MM_NEGATIVE_REGULATION_OF_INTERLEUKIN-6_PRODUCTION	2/839	18/17799	0.207262	0.502753	0.42973	TNF/TNFAIP3	2
GO_BP_MM_NEGATIVE_REGULATION_OF_PHOSPHORYLATION	GO_BP_MM_NEGATIVE_REGULATION_OF_PHOSPHORYLATION	2/839	18/17799	0.207262	0.502753	0.42973	CDKN2B/DYNLL1	2
GO_BP_MM_NEGATIVE_REGULATION_OF_SMOOTHENED_SIGNALING_PATHWAY	GO_BP_MM_NEGATIVE_REGULATION_OF_SMOOTHENED_SIGNALING_PATHWAY	2/839	18/17799	0.207262	0.502753	0.42973	SERPINE2/WNT7B	2
GO_BP_MM_POSITIVE_CHEMOTAXIS	GO_BP_MM_POSITIVE_CHEMOTAXIS	2/839	18/17799	0.207262	0.502753	0.42973	CCL5/HMGB2	2
GO_BP_MM_POSITIVE_REGULATION_OF_CELL_DEATH	GO_BP_MM_POSITIVE_REGULATION_OF_CELL_DEATH	2/839	18/17799	0.207262	0.502753	0.42973	MYCN/CTGF	2
GO_BP_MM_POSITIVE_REGULATION_OF_INTERLEUKIN-12_PRODUCTION	GO_BP_MM_POSITIVE_REGULATION_OF_INTERLEUKIN-12_PRODUCTION	2/839	18/17799	0.207262	0.502753	0.42973	CD40/IL23A	2
GO_BP_MM_POSITIVE_REGULATION_OF_NEUROGENESIS	GO_BP_MM_POSITIVE_REGULATION_OF_NEUROGENESIS	2/839	18/17799	0.207262	0.502753	0.42973	ACE/LIG4	2
GO_BP_MM_POSITIVE_REGULATION_OF_PROTEIN_TYROSINE_KINASE_ACTIVITY	GO_BP_MM_POSITIVE_REGULATION_OF_PROTEIN_TYROSINE_KINASE_ACTIVITY	2/839	18/17799	0.207262	0.502753	0.42973	LRP8/PDGFB	2
GO_BP_MM_POSITIVE_REGULATION_OF_SYNAPSE_ASSEMBLY	GO_BP_MM_POSITIVE_REGULATION_OF_SYNAPSE_ASSEMBLY	2/839	18/17799	0.207262	0.502753	0.42973	WNT7A/BDNF	2
GO_BP_MM_POSITIVE_REGULATION_OF_TRANSFORMING_GROWTH_FACTOR_BETA_RECEPTOR_SIGNALING_PATHWAY	GO_BP_MM_POSITIVE_REGULATION_OF_TRANSFORMING_GROWTH_FACTOR_BETA_RECEPTOR_SIGNALING_PATHWAY	2/839	18/17799	0.207262	0.502753	0.42973	CDKN2B/THBS1	2
GO_BP_MM_RESPONSE_TO_VITAMIN_D	GO_BP_MM_RESPONSE_TO_VITAMIN_D	2/839	18/17799	0.207262	0.502753	0.42973	PTGS2/CXCL10	2
GO_CC_MM_IMMUNOLOGICAL_SYNAPSE	GO_CC_MM_IMMUNOLOGICAL_SYNAPSE	2/839	18/17799	0.207262	0.502753	0.42973	MYH9/ICAM1	2
GO_MF_MM_L-ASCORBIC_ACID_BINDING	GO_MF_MM_L-ASCORBIC_ACID_BINDING	2/839	18/17799	0.207262	0.502753	0.42973	PAM/EGLN3	2
GO_BP_MM_KERATINOCYTE_DIFFERENTIATION	GO_BP_MM_KERATINOCYTE_DIFFERENTIATION	4/839	50/17799	0.208814	0.505786	0.432323	MADCAM1/PTGS2/IVL/SFN	4
GO_BP_MM_LIVER_DEVELOPMENT	GO_BP_MM_LIVER_DEVELOPMENT	6/839	85/17799	0.21169	0.512015	0.437647	FOXM1/ASNS/CCNE1/RUNX1/PCSK9/AACS	6
GO_BP_MM_ACTIN_CYTOSKELETON_REORGANIZATION	GO_BP_MM_ACTIN_CYTOSKELETON_REORGANIZATION	3/839	34/17799	0.214648	0.515462	0.440593	MYH9/RALA/PIP5K1A	3
GO_BP_MM_SOMATIC_STEM_CELL_MAINTENANCE	GO_BP_MM_SOMATIC_STEM_CELL_MAINTENANCE	3/839	34/17799	0.214648	0.515462	0.440593	WNT7A/VANGL2/LIG4	3
GO_CC_MM_ACTIN_FILAMENT	GO_CC_MM_ACTIN_FILAMENT	3/839	34/17799	0.214648	0.515462	0.440593	WHRN/LCP1/VCL	3
GO_MF_MM_IRON-SULFUR_CLUSTER_BINDING	GO_MF_MM_IRON-SULFUR_CLUSTER_BINDING	3/839	34/17799	0.214648	0.515462	0.440593	NUBP1/RSAD2/PPAT	3
GO_MF_MM_PEPTIDASE_INHIBITOR_ACTIVITY	GO_MF_MM_PEPTIDASE_INHIBITOR_ACTIVITY	3/839	34/17799	0.214648	0.515462	0.440593	SLPI/WFDC18/WFDC2	3
GO_BP_MM_NEGATIVE_REGULATION_OF_GENE_EXPRESSION	GO_BP_MM_NEGATIVE_REGULATION_OF_GENE_EXPRESSION	5/839	68/17799	0.216548	0.519282	0.443859	IQGAP3/CCNB1/TNF/BAK1/PLAUR	5
GO_BP_MM_CELLULAR_RESPONSE_TO_GROWTH_FACTOR_STIMULUS	GO_BP_MM_CELLULAR_RESPONSE_TO_GROWTH_FACTOR_STIMULUS	4/839	51/17799	0.218824	0.523249	0.447249	EHD4/HAP1/PFN1/AKT1	4
GO_MF_MM_CHLORIDE_CHANNEL_ACTIVITY	GO_MF_MM_CHLORIDE_CHANNEL_ACTIVITY	4/839	51/17799	0.218824	0.523249	0.447249	ANO9/GABRP/ABCC4/TTYH2	4
GO_BP_MM_CELL_COMMUNICATION	GO_BP_MM_CELL_COMMUNICATION	6/839	86/17799	0.219258	0.523542	0.4475	GJB3/GJB4/NOXO1/SH3PXD2B/PXDC1/SNX7	6
GO_BP_MM_ADIPOSE_TISSUE_DEVELOPMENT	GO_BP_MM_ADIPOSE_TISSUE_DEVELOPMENT	2/839	19/17799	0.224869	0.528951	0.452123	SH3PXD2B/AACS	2
GO_BP_MM_CAMP-MEDIATED_SIGNALING	GO_BP_MM_CAMP-MEDIATED_SIGNALING	2/839	19/17799	0.224869	0.528951	0.452123	ADM/PDE7A	2
GO_BP_MM_CARTILAGE_CONDENSATION	GO_BP_MM_CARTILAGE_CONDENSATION	2/839	19/17799	0.224869	0.528951	0.452123	MYCN/CTGF	2
GO_BP_MM_HISTONE_LYSINE_METHYLATION	GO_BP_MM_HISTONE_LYSINE_METHYLATION	2/839	19/17799	0.224869	0.528951	0.452123	SUV39H2/WHSC1	2
GO_BP_MM_POSITIVE_REGULATION_OF_PROTEIN_SECRETION	GO_BP_MM_POSITIVE_REGULATION_OF_PROTEIN_SECRETION	2/839	19/17799	0.224869	0.528951	0.452123	KCNN4/ANKRD1	2
GO_BP_MM_POSITIVE_REGULATION_OF_TYROSINE_PHOSPHORYLATION_OF_STAT3_PROTEIN	GO_BP_MM_POSITIVE_REGULATION_OF_TYROSINE_PHOSPHORYLATION_OF_STAT3_PROTEIN	2/839	19/17799	0.224869	0.528951	0.452123	LIF/IL23A	2
GO_BP_MM_PROTEIN_IMPORT_INTO_NUCLEUS_TRANSLOCATION	GO_BP_MM_PROTEIN_IMPORT_INTO_NUCLEUS_TRANSLOCATION	2/839	19/17799	0.224869	0.528951	0.452123	TNF/AKT1	2
GO_CC_MM_ANAPHASE-PROMOTING_COMPLEX	GO_CC_MM_ANAPHASE-PROMOTING_COMPLEX	2/839	19/17799	0.224869	0.528951	0.452123	UBE2C/CDC20	2
GO_MF_MM_PEROXIDASE_ACTIVITY	GO_MF_MM_PEROXIDASE_ACTIVITY	2/839	19/17799	0.224869	0.528951	0.452123	PTGS2/PXDN	2
GO_MF_MM_PHOSPHATIDYLINOSITOL_PHOSPHOLIPASE_C_ACTIVITY	GO_MF_MM_PHOSPHATIDYLINOSITOL_PHOSPHOLIPASE_C_ACTIVITY	2/839	19/17799	0.224869	0.528951	0.452123	CCL5/PLCG2	2
GO_MF_MM_HEAT_SHOCK_PROTEIN_BINDING	GO_MF_MM_HEAT_SHOCK_PROTEIN_BINDING	5/839	69/17799	0.225178	0.528951	0.452123	FKBP5/DNAJB14/DNAJC9/BAK1/DNAJC10	5
GO_BP_MM_NEGATIVE_REGULATION_OF_OSTEOBLAST_DIFFERENTIATION	GO_BP_MM_NEGATIVE_REGULATION_OF_OSTEOBLAST_DIFFERENTIATION	3/839	35/17799	0.227188	0.528951	0.452123	CDK6/TNF/2410016O06RIK	3
GO_BP_MM_RESPONSE_TO_ANTIBIOTIC	GO_BP_MM_RESPONSE_TO_ANTIBIOTIC	3/839	35/17799	0.227188	0.528951	0.452123	CCL2/PLK1/ETS1	3
GO_BP_MM_RESPONSE_TO_UV	GO_BP_MM_RESPONSE_TO_UV	3/839	35/17799	0.227188	0.528951	0.452123	RAD18/DTL/PMAIP1	3
GO_BP_MM_TRNA_AMINOACYLATION_FOR_PROTEIN_TRANSLATION	GO_BP_MM_TRNA_AMINOACYLATION_FOR_PROTEIN_TRANSLATION	3/839	35/17799	0.227188	0.528951	0.452123	SARS2/MARS/VARS	3
GO_CC_MM_CELL-CELL_ADHERENS_JUNCTION	GO_CC_MM_CELL-CELL_ADHERENS_JUNCTION	3/839	35/17799	0.227188	0.528951	0.452123	MYH9/SSX2IP/VCL	3
GO_MF_MM_CYSTEINE-TYPE_ENDOPEPTIDASE_ACTIVITY	GO_MF_MM_CYSTEINE-TYPE_ENDOPEPTIDASE_ACTIVITY	3/839	35/17799	0.227188	0.528951	0.452123	UCHL1/CASP4/USP37	3
GO_MF_MM_PROTEIN_BINDING_BRIDGING	GO_MF_MM_PROTEIN_BINDING_BRIDGING	3/839	35/17799	0.227188	0.528951	0.452123	FGB/TNNT2/IVL	3
GO_MF_MM_SYMPORTER_ACTIVITY	GO_MF_MM_SYMPORTER_ACTIVITY	4/839	52/17799	0.22896	0.532341	0.455021	SLC16A6/SLC4A4/SLC36A1/SLC16A1	4
GO_BP_MM_CELL_MORPHOGENESIS	GO_BP_MM_CELL_MORPHOGENESIS	5/839	70/17799	0.233909	0.543096	0.464213	ADAM8/ECT2/EGFR/ARHGEF2/TFCP2L1	5
GO_BP_MM_MRNA_TRANSPORT	GO_BP_MM_MRNA_TRANSPORT	4/839	53/17799	0.239211	0.549172	0.469407	NUP93/ALYREF/NUP210/EIF5A	4
GO_MF_MM_COPPER_ION_BINDING	GO_MF_MM_COPPER_ION_BINDING	4/839	53/17799	0.239211	0.549172	0.469407	P2RX2/MT1/PAM/SLC11A2	4
GO_BP_MM_PATTERNING_OF_BLOOD_VESSELS	GO_BP_MM_PATTERNING_OF_BLOOD_VESSELS	3/839	36/17799	0.239862	0.549172	0.469407	SEMA3E/NRARP/VANGL2	3
GO_CC_MM_ADHERENS_JUNCTION	GO_CC_MM_ADHERENS_JUNCTION	3/839	36/17799	0.239862	0.549172	0.469407	RND1/9430020K01RIK/VCL	3
GO_BP_MM_FERROUS_IRON_TRANSPORT	GO_BP_MM_FERROUS_IRON_TRANSPORT	2/839	20/17799	0.24258	0.549172	0.469407	GEM/SLC11A2	2
GO_BP_MM_I-KAPPAB_KINASE_NF-KAPPAB_CASCADE	GO_BP_MM_I-KAPPAB_KINASE_NF-KAPPAB_CASCADE	2/839	20/17799	0.24258	0.549172	0.469407	RIPK3/TIRAP	2
GO_BP_MM_LIMB_DEVELOPMENT	GO_BP_MM_LIMB_DEVELOPMENT	2/839	20/17799	0.24258	0.549172	0.469407	WNT7A/PAM	2
GO_BP_MM_MAMMARY_GLAND_ALVEOLUS_DEVELOPMENT	GO_BP_MM_MAMMARY_GLAND_ALVEOLUS_DEVELOPMENT	2/839	20/17799	0.24258	0.549172	0.469407	TNFRSF11A/SOCS2	2
GO_BP_MM_NEGATIVE_REGULATION_OF_ERK1_AND_ERK2_CASCADE	GO_BP_MM_NEGATIVE_REGULATION_OF_ERK1_AND_ERK2_CASCADE	2/839	20/17799	0.24258	0.549172	0.469407	BC021614/LIF	2
GO_BP_MM_NEGATIVE_REGULATION_OF_PROTEIN_UBIQUITINATION	GO_BP_MM_NEGATIVE_REGULATION_OF_PROTEIN_UBIQUITINATION	2/839	20/17799	0.24258	0.549172	0.469407	TNFAIP3/GCLC	2
GO_CC_MM_CONNEXON_COMPLEX	GO_CC_MM_CONNEXON_COMPLEX	2/839	20/17799	0.24258	0.549172	0.469407	GJB3/GJB4	2
GO_MF_MM_3-BETA-HYDROXY-DELTA5-STEROID_DEHYDROGENASE_ACTIVITY	GO_MF_MM_3-BETA-HYDROXY-DELTA5-STEROID_DEHYDROGENASE_ACTIVITY	2/839	20/17799	0.24258	0.549172	0.469407	GALE/NMRAL1	2
GO_MF_MM_BETA-TUBULIN_BINDING	GO_MF_MM_BETA-TUBULIN_BINDING	2/839	20/17799	0.24258	0.549172	0.469407	RACGAP1/UXT	2
GO_MF_MM_FERRIC_IRON_BINDING	GO_MF_MM_FERRIC_IRON_BINDING	2/839	20/17799	0.24258	0.549172	0.469407	ACP5/MFI2	2
GO_MF_MM_FERROUS_IRON_TRANSMEMBRANE_TRANSPORTER_ACTIVITY	GO_MF_MM_FERROUS_IRON_TRANSMEMBRANE_TRANSPORTER_ACTIVITY	2/839	20/17799	0.24258	0.549172	0.469407	GEM/SLC11A2	2
GO_MF_MM_HYALURONIC_ACID_BINDING	GO_MF_MM_HYALURONIC_ACID_BINDING	2/839	20/17799	0.24258	0.549172	0.469407	CD44/HMMR	2
GO_MF_MM_HYDROLASE_ACTIVITY_ACTING_ON_ACID_ANHYDRIDES_IN_PHOSPHORUS-CONTAINING_ANHYDRIDES	GO_MF_MM_HYDROLASE_ACTIVITY_ACTING_ON_ACID_ANHYDRIDES_IN_PHOSPHORUS-CONTAINING_ANHYDRIDES	2/839	20/17799	0.24258	0.549172	0.469407	BRIP1/BLM	2
GO_MF_MM_PHOSPHOLIPASE_C_ACTIVITY	GO_MF_MM_PHOSPHOLIPASE_C_ACTIVITY	2/839	20/17799	0.24258	0.549172	0.469407	PLCG2/PLCXD2	2
GO_BP_MM_INTEGRIN-MEDIATED_SIGNALING_PATHWAY	GO_BP_MM_INTEGRIN-MEDIATED_SIGNALING_PATHWAY	5/839	71/17799	0.242733	0.549172	0.469407	ADAM8/ITGAV/CTGF/ITGB6/CIB1	5
GO_BP_MM_REGULATION_OF_GENE_EXPRESSION	GO_BP_MM_REGULATION_OF_GENE_EXPRESSION	6/839	90/17799	0.250381	0.565712	0.483545	CSF2/CDK6/PLCG2/AHR/DNMT1/TGFBR1	6
GO_BP_MM_CELLULAR_IRON_ION_HOMEOSTASIS	GO_BP_MM_CELLULAR_IRON_ION_HOMEOSTASIS	3/839	37/17799	0.25265	0.567028	0.48467	NUBP1/TFRC/MFI2	3
GO_CC_MM_LIPID_PARTICLE	GO_CC_MM_LIPID_PARTICLE	3/839	37/17799	0.25265	0.567028	0.48467	EHD1/ANXA2/ACSL4	3
GO_MF_MM_AMINOACYL-TRNA_LIGASE_ACTIVITY	GO_MF_MM_AMINOACYL-TRNA_LIGASE_ACTIVITY	3/839	37/17799	0.25265	0.567028	0.48467	SARS2/MARS/VARS	3
GO_MF_MM_TRANSMEMBRANE_RECEPTOR_PROTEIN_TYROSINE_KINASE_ACTIVITY	GO_MF_MM_TRANSMEMBRANE_RECEPTOR_PROTEIN_TYROSINE_KINASE_ACTIVITY	3/839	37/17799	0.25265	0.567028	0.48467	AXL/FLT4/EGFR	3
GO_MF_MM_UBIQUITIN-SPECIFIC_PROTEASE_ACTIVITY	GO_MF_MM_UBIQUITIN-SPECIFIC_PROTEASE_ACTIVITY	3/839	37/17799	0.25265	0.567028	0.48467	TNFAIP3/OTUB1/USP37	3
GO_BP_MM_DEFENSE_RESPONSE_TO_VIRUS	GO_BP_MM_DEFENSE_RESPONSE_TO_VIRUS	4/839	55/17799	0.260012	0.575842	0.492203	CD40/PLSCR1/RSAD2/CXCL10	4
GO_MF_MM_TRANSFERASE_ACTIVITY_TRANSFERRING_ACYL_GROUPS	GO_MF_MM_TRANSFERASE_ACTIVITY_TRANSFERRING_ACYL_GROUPS	4/839	55/17799	0.260012	0.575842	0.492203	ESCO2/PIGW/LPCAT4/LPCAT2	4
GO_BP_MM_CALCIUM-INDEPENDENT_CELL-CELL_ADHESION	GO_BP_MM_CALCIUM-INDEPENDENT_CELL-CELL_ADHESION	2/839	21/17799	0.260345	0.575842	0.492203	CLDN2/CLDN4	2
GO_BP_MM_CELLULAR_RESPONSE_TO_HEAT	GO_BP_MM_CELLULAR_RESPONSE_TO_HEAT	2/839	21/17799	0.260345	0.575842	0.492203	MKI67/CXCL10	2
GO_BP_MM_ERK1_AND_ERK2_CASCADE	GO_BP_MM_ERK1_AND_ERK2_CASCADE	2/839	21/17799	0.260345	0.575842	0.492203	IQGAP3/ITGAV	2
GO_BP_MM_FEMALE_GONAD_DEVELOPMENT	GO_BP_MM_FEMALE_GONAD_DEVELOPMENT	2/839	21/17799	0.260345	0.575842	0.492203	FST/WNT10A	2
GO_BP_MM_HOMEOSTASIS_OF_NUMBER_OF_CELLS_WITHIN_A_TISSUE	GO_BP_MM_HOMEOSTASIS_OF_NUMBER_OF_CELLS_WITHIN_A_TISSUE	2/839	21/17799	0.260345	0.575842	0.492203	CSF1/BAX	2
GO_BP_MM_PHOSPHOLIPID_METABOLIC_PROCESS	GO_BP_MM_PHOSPHOLIPID_METABOLIC_PROCESS	2/839	21/17799	0.260345	0.575842	0.492203	PLA2G2D/PCSK9	2
GO_BP_MM_RESPONSE_TO_HYPEROXIA	GO_BP_MM_RESPONSE_TO_HYPEROXIA	2/839	21/17799	0.260345	0.575842	0.492203	PLAU/SERPINE1	2
GO_MF_MM_ENZYME_ACTIVATOR_ACTIVITY	GO_MF_MM_ENZYME_ACTIVATOR_ACTIVITY	2/839	21/17799	0.260345	0.575842	0.492203	GUCA2B/SEC14L2	2
GO_MF_MM_NF-KAPPAB_BINDING	GO_MF_MM_NF-KAPPAB_BINDING	2/839	21/17799	0.260345	0.575842	0.492203	NFKBID/TAF4B	2
GO_CC_MM_INTEGRAL_TO_PLASMA_MEMBRANE	GO_CC_MM_INTEGRAL_TO_PLASMA_MEMBRANE	18/839	322/17799	0.261043	0.576628	0.492875	CDH17/ADAM8/TNF/STEAP4/PAM/FLT4/ORAI1/SLC11A2/DCBLD2/STOM/PLSCR1/SLC6A9/SLC4A4/KCNN4/OSMR/PLAUR/ITPR3/YKT6	18
GO_BP_MM_STEROID_BIOSYNTHETIC_PROCESS	GO_BP_MM_STEROID_BIOSYNTHETIC_PROCESS	3/839	38/17799	0.265532	0.585773	0.500692	TSPO/GALE/NMRAL1	3
GO_CC_MM_MEMBRANE_RAFT	GO_CC_MM_MEMBRANE_RAFT	9/839	149/17799	0.270254	0.595409	0.508929	TNFRSF1B/TNF/STOM/PLSCR1/CD14/PLLP/TGFBR1/EGFR/RIPK1	9
GO_BP_MM_CYTOKINE_PRODUCTION	GO_BP_MM_CYTOKINE_PRODUCTION	2/839	22/17799	0.27812	0.606363	0.518292	CXCL5/MAF	2
GO_BP_MM_NEGATIVE_REGULATION_OF_DNA_BINDING	GO_BP_MM_NEGATIVE_REGULATION_OF_DNA_BINDING	2/839	22/17799	0.27812	0.606363	0.518292	NEK2/HMOX1	2
GO_BP_MM_NEGATIVE_REGULATION_OF_ENDOTHELIAL_CELL_PROLIFERATION	GO_BP_MM_NEGATIVE_REGULATION_OF_ENDOTHELIAL_CELL_PROLIFERATION	2/839	22/17799	0.27812	0.606363	0.518292	VASH1/THBS1	2
GO_BP_MM_NEGATIVE_REGULATION_OF_PROTEIN_BINDING	GO_BP_MM_NEGATIVE_REGULATION_OF_PROTEIN_BINDING	2/839	22/17799	0.27812	0.606363	0.518292	SLPI/BAX	2
GO_BP_MM_POSITIVE_REGULATION_OF_DNA_BINDING	GO_BP_MM_POSITIVE_REGULATION_OF_DNA_BINDING	2/839	22/17799	0.27812	0.606363	0.518292	NME1/HMGB2	2
GO_BP_MM_REGULATION_OF_RNA_SPLICING	GO_BP_MM_REGULATION_OF_RNA_SPLICING	2/839	22/17799	0.27812	0.606363	0.518292	MBNL3/ESRP1	2
GO_BP_MM_VASCULAR_ENDOTHELIAL_GROWTH_FACTOR_RECEPTOR_SIGNALING_PATHWAY	GO_BP_MM_VASCULAR_ENDOTHELIAL_GROWTH_FACTOR_RECEPTOR_SIGNALING_PATHWAY	2/839	22/17799	0.27812	0.606363	0.518292	CCL2/FLT4	2
GO_CC_MM_EXTRINSIC_TO_PLASMA_MEMBRANE	GO_CC_MM_EXTRINSIC_TO_PLASMA_MEMBRANE	2/839	22/17799	0.27812	0.606363	0.518292	OLR1/ANXA2	2
GO_CC_MM_CAJAL_BODY	GO_CC_MM_CAJAL_BODY	3/839	39/17799	0.27849	0.606363	0.518292	NHP2/EFTUD2/GAR1	3
GO_CC_MM_MITOCHONDRIAL_MEMBRANE	GO_CC_MM_MITOCHONDRIAL_MEMBRANE	5/839	75/17799	0.278833	0.606363	0.518292	BOK/NDUFAF4/BAX/BAK1/ACSL4	5
GO_BP_MM_PEPTIDYL-TYROSINE_PHOSPHORYLATION	GO_BP_MM_PEPTIDYL-TYROSINE_PHOSPHORYLATION	4/839	57/17799	0.281145	0.610601	0.521914	JAK3/PDGFB/FLT4/STAT5A	4
GO_BP_MM_NEURON_DIFFERENTIATION	GO_BP_MM_NEURON_DIFFERENTIATION	6/839	94/17799	0.282642	0.61306	0.524016	RUNX1/WNT7B/PCSK9/TUBB2B/TUBB5/TUBB4B	6
GO_BP_MM_RNA_SPLICING	GO_BP_MM_RNA_SPLICING	10/839	171/17799	0.287409	0.622595	0.532166	MBNL3/NCBP1/ESRP1/ALYREF/RBM25/SNRPD1/YBX1/EFTUD2/NAA38/PPIL1	10
GO_BP_MM_PROTEIN_TRANSPORT	GO_BP_MM_PROTEIN_TRANSPORT	25/839	469/17799	0.290832	0.627173	0.536079	ECT2/SERP2/NUP93/GEM/CENPF/HOOK1/RND1/VPS37A/KDELR3/RAB11FIP5/ARL4C/SNX7/RAP2B/GOLT1B/MYH9/RALB/RP2H/NUP210/RAN/RALA/EIF5A/COX18/IPO9/YKT6/RAB31	25
GO_MF_MM_RNA_POLYMERASE_II_DISTAL_ENHANCER_SEQUENCE-SPECIFIC_DNA_BINDING_TRANSCRIPTION_FACTOR_ACTIVITY	GO_MF_MM_RNA_POLYMERASE_II_DISTAL_ENHANCER_SEQUENCE-SPECIFIC_DNA_BINDING_TRANSCRIPTION_FACTOR_ACTIVITY	6/839	95/17799	0.290851	0.627173	0.536079	BHLHE41/FOXM1/FOXQ1/AHR/FOXN2/FOXA3	6
GO_BP_MM_ENDOCRINE_PANCREAS_DEVELOPMENT	GO_BP_MM_ENDOCRINE_PANCREAS_DEVELOPMENT	3/839	40/17799	0.291506	0.627173	0.536079	BAK1/FOXA3/AKT1	3
GO_CC_MM_MICROVILLUS	GO_CC_MM_MICROVILLUS	3/839	40/17799	0.291506	0.627173	0.536079	MSN/VCAM1/CAR2	3
GO_BP_MM_CARBOHYDRATE_TRANSPORT	GO_BP_MM_CARBOHYDRATE_TRANSPORT	2/839	23/17799	0.295865	0.627173	0.536079	SLC35B1/SLC35C1	2
GO_BP_MM_GLUCOSE_TRANSPORT	GO_BP_MM_GLUCOSE_TRANSPORT	2/839	23/17799	0.295865	0.627173	0.536079	FABP5/AKT1	2
GO_BP_MM_GONAD_DEVELOPMENT	GO_BP_MM_GONAD_DEVELOPMENT	2/839	23/17799	0.295865	0.627173	0.536079	SERPINB6B/RDH10	2
GO_BP_MM_POSITIVE_REGULATION_OF_DNA_REPAIR	GO_BP_MM_POSITIVE_REGULATION_OF_DNA_REPAIR	2/839	23/17799	0.295865	0.627173	0.536079	BRCA1/EGFR	2
GO_BP_MM_POSITIVE_REGULATION_OF_FAT_CELL_DIFFERENTIATION	GO_BP_MM_POSITIVE_REGULATION_OF_FAT_CELL_DIFFERENTIATION	2/839	23/17799	0.295865	0.627173	0.536079	SH3PXD2B/AKT1	2
GO_BP_MM_REGULATION_OF_ARF_GTPASE_ACTIVITY	GO_BP_MM_REGULATION_OF_ARF_GTPASE_ACTIVITY	2/839	23/17799	0.295865	0.627173	0.536079	AGFG1/SMAP1	2
GO_BP_MM_REGULATION_OF_MITOTIC_CELL_CYCLE	GO_BP_MM_REGULATION_OF_MITOTIC_CELL_CYCLE	2/839	23/17799	0.295865	0.627173	0.536079	PLK1/SIK1	2
GO_CC_MM_CORNIFIED_ENVELOPE	GO_CC_MM_CORNIFIED_ENVELOPE	2/839	23/17799	0.295865	0.627173	0.536079	IVL/KAZN	2
GO_CC_MM_CORTICAL_ACTIN_CYTOSKELETON	GO_CC_MM_CORTICAL_ACTIN_CYTOSKELETON	2/839	23/17799	0.295865	0.627173	0.536079	SCNN1A/ACTN1	2
GO_MF_MM_ARF_GTPASE_ACTIVATOR_ACTIVITY	GO_MF_MM_ARF_GTPASE_ACTIVATOR_ACTIVITY	2/839	23/17799	0.295865	0.627173	0.536079	AGFG1/SMAP1	2
GO_MF_MM_FRIZZLED_BINDING	GO_MF_MM_FRIZZLED_BINDING	2/839	23/17799	0.295865	0.627173	0.536079	WNT7A/WNT7B	2
GO_MF_MM_OXIDOREDUCTASE_ACTIVITY_ACTING_ON_THE_ALDEHYDE_OR_OXO_GROUP_OF_DONORS_NAD_OR_NADP_AS_ACCEPTOR	GO_MF_MM_OXIDOREDUCTASE_ACTIVITY_ACTING_ON_THE_ALDEHYDE_OR_OXO_GROUP_OF_DONORS_NAD_OR_NADP_AS_ACCEPTOR	2/839	23/17799	0.295865	0.627173	0.536079	ALDH1A7/FAR1	2
GO_MF_MM_STEROID_BINDING	GO_MF_MM_STEROID_BINDING	2/839	23/17799	0.295865	0.627173	0.536079	PAQR5/HSD11B2	2
GO_BP_MM_ORGAN_MORPHOGENESIS	GO_BP_MM_ORGAN_MORPHOGENESIS	6/839	96/17799	0.299109	0.633251	0.541274	WNT10A/WNT7A/TNF/GMNN/EFNB2/RDH10	6
GO_CC_MM_LAMELLIPODIUM	GO_CC_MM_LAMELLIPODIUM	6/839	97/17799	0.30741	0.650008	0.555597	NME1/NME2/GSN/PIP5K1A/TESC/AKT1	6
GO_BP_MM_REGULATION_OF_TRANSCRIPTION_FROM_RNA_POLYMERASE_II_PROMOTER	GO_BP_MM_REGULATION_OF_TRANSCRIPTION_FROM_RNA_POLYMERASE_II_PROMOTER	12/839	214/17799	0.309946	0.650697	0.556186	FHL2/BRIP1/ZFP367/ETS1/AHR/HMGB2/TAF4B/STAT5A/FOXA3/MED8/PFN1/ANKRD1	12
GO_BP_MM_TRANSFORMING_GROWTH_FACTOR_BETA_RECEPTOR_SIGNALING_PATHWAY	GO_BP_MM_TRANSFORMING_GROWTH_FACTOR_BETA_RECEPTOR_SIGNALING_PATHWAY	4/839	60/17799	0.313287	0.650697	0.556186	CCL2/LTBP1/PDGFB/TGFBR1	4
GO_BP_MM_BLASTOCYST_DEVELOPMENT	GO_BP_MM_BLASTOCYST_DEVELOPMENT	2/839	24/17799	0.313542	0.650697	0.556186	G2E3/TGFBR1	2
GO_BP_MM_CELLULAR_RESPONSE_TO_INTERFERON-GAMMA	GO_BP_MM_CELLULAR_RESPONSE_TO_INTERFERON-GAMMA	2/839	24/17799	0.313542	0.650697	0.556186	CCL2/CCL5	2
GO_BP_MM_IRON_ION_TRANSPORT	GO_BP_MM_IRON_ION_TRANSPORT	2/839	24/17799	0.313542	0.650697	0.556186	SLC11A2/MFI2	2
GO_BP_MM_METAL_ION_TRANSPORT	GO_BP_MM_METAL_ION_TRANSPORT	2/839	24/17799	0.313542	0.650697	0.556186	ATP1B3/SLC39A1	2
GO_BP_MM_NEGATIVE_REGULATION_OF_SMOOTH_MUSCLE_CELL_PROLIFERATION	GO_BP_MM_NEGATIVE_REGULATION_OF_SMOOTH_MUSCLE_CELL_PROLIFERATION	2/839	24/17799	0.313542	0.650697	0.556186	HMOX1/TNFAIP3	2
GO_BP_MM_OOGENESIS	GO_BP_MM_OOGENESIS	2/839	24/17799	0.313542	0.650697	0.556186	PAQR5/TRIP13	2
GO_BP_MM_POSITIVE_REGULATION_OF_RHO_GTPASE_ACTIVITY	GO_BP_MM_POSITIVE_REGULATION_OF_RHO_GTPASE_ACTIVITY	2/839	24/17799	0.313542	0.650697	0.556186	ECT2/CDC42EP2	2
GO_BP_MM_RECEPTOR_INTERNALIZATION	GO_BP_MM_RECEPTOR_INTERNALIZATION	2/839	24/17799	0.313542	0.650697	0.556186	ADM/LDLRAP1	2
GO_CC_MM_U12-TYPE_SPLICEOSOMAL_COMPLEX	GO_CC_MM_U12-TYPE_SPLICEOSOMAL_COMPLEX	2/839	24/17799	0.313542	0.650697	0.556186	SNRPD1/YBX1	2
GO_MF_MM_AMINO_ACID_BINDING	GO_MF_MM_AMINO_ACID_BINDING	2/839	24/17799	0.313542	0.650697	0.556186	DDAH1/CAD	2
GO_MF_MM_CYTOKINE_RECEPTOR_ACTIVITY	GO_MF_MM_CYTOKINE_RECEPTOR_ACTIVITY	2/839	24/17799	0.313542	0.650697	0.556186	CX3CR1/IL3RA	2
GO_MF_MM_EPHRIN_RECEPTOR_BINDING	GO_MF_MM_EPHRIN_RECEPTOR_BINDING	2/839	24/17799	0.313542	0.650697	0.556186	EFNA5/EFNB2	2
GO_MF_MM_HISTONE-LYSINE_N-METHYLTRANSFERASE_ACTIVITY	GO_MF_MM_HISTONE-LYSINE_N-METHYLTRANSFERASE_ACTIVITY	2/839	24/17799	0.313542	0.650697	0.556186	SUV39H2/WHSC1	2
GO_CC_MM_MICROSOME	GO_CC_MM_MICROSOME	15/839	275/17799	0.317596	0.658296	0.562682	CNR1/PTGS2/FBXO2/HSD11B2/CD38/HMOX1/HSD17B2/NME1/SULT2B1/LRRC59/ACSL4/DNAJC10/USO1/ITPR3/RDH10	15
GO_MF_MM_HYDROLASE_ACTIVITY	GO_MF_MM_HYDROLASE_ACTIVITY	17/839	316/17799	0.322271	0.667164	0.570261	RAD54B/ADAT2/MRE11A/FIGNL1/RAD54L/ACP5/DUT/CNDP2/CTPS/XPNPEP1/CDA/HDHD3/CAD/PDE12/DDX21/PGP/LACTB2	17
GO_CC_MM_GOLGI_CISTERNA_MEMBRANE	GO_CC_MM_GOLGI_CISTERNA_MEMBRANE	4/839	61/17799	0.324081	0.670085	0.572758	CHSY3/GGTA1/GALNT3/ST3GAL1	4
GO_MF_MM_METALLOENDOPEPTIDASE_ACTIVITY	GO_MF_MM_METALLOENDOPEPTIDASE_ACTIVITY	7/839	119/17799	0.329441	0.670618	0.573214	ADAM8/MMP7/MMP23/BMP1/IDE/NLN/MMP14	7
GO_BP_MM_CELL_DEATH	GO_BP_MM_CELL_DEATH	3/839	43/17799	0.330727	0.670618	0.573214	OLR1/TNFRSF1B/HMOX1	3
GO_BP_MM_DIGESTIVE_TRACT_DEVELOPMENT	GO_BP_MM_DIGESTIVE_TRACT_DEVELOPMENT	2/839	25/17799	0.33112	0.670618	0.573214	CCNB1/TGFBR1	2
GO_BP_MM_EATING_BEHAVIOR	GO_BP_MM_EATING_BEHAVIOR	2/839	25/17799	0.33112	0.670618	0.573214	UCHL1/ACE	2
GO_BP_MM_LIMB_MORPHOGENESIS	GO_BP_MM_LIMB_MORPHOGENESIS	2/839	25/17799	0.33112	0.670618	0.573214	BAX/BAK1	2
GO_BP_MM_NEGATIVE_REGULATION_OF_BLOOD_PRESSURE	GO_BP_MM_NEGATIVE_REGULATION_OF_BLOOD_PRESSURE	2/839	25/17799	0.33112	0.670618	0.573214	GUCA2B/CNR1	2
GO_BP_MM_NEGATIVE_REGULATION_OF_CELL_ADHESION	GO_BP_MM_NEGATIVE_REGULATION_OF_CELL_ADHESION	2/839	25/17799	0.33112	0.670618	0.573214	RND1/LAMB1	2
GO_BP_MM_NEUROMUSCULAR_JUNCTION_DEVELOPMENT	GO_BP_MM_NEUROMUSCULAR_JUNCTION_DEVELOPMENT	2/839	25/17799	0.33112	0.670618	0.573214	P2RX2/COL4A1	2
GO_BP_MM_PLATELET-DERIVED_GROWTH_FACTOR_RECEPTOR_SIGNALING_PATHWAY	GO_BP_MM_PLATELET-DERIVED_GROWTH_FACTOR_RECEPTOR_SIGNALING_PATHWAY	2/839	25/17799	0.33112	0.670618	0.573214	PLAT/PDGFB	2
GO_BP_MM_POSITIVE_REGULATION_OF_CYTOKINE_SECRETION	GO_BP_MM_POSITIVE_REGULATION_OF_CYTOKINE_SECRETION	2/839	25/17799	0.33112	0.670618	0.573214	TNF/CD14	2
GO_BP_MM_PROTEIN_K11-LINKED_UBIQUITINATION	GO_BP_MM_PROTEIN_K11-LINKED_UBIQUITINATION	2/839	25/17799	0.33112	0.670618	0.573214	UBE2C/UBE2T	2
GO_BP_MM_REGULATION_OF_CELL_DIFFERENTIATION	GO_BP_MM_REGULATION_OF_CELL_DIFFERENTIATION	2/839	25/17799	0.33112	0.670618	0.573214	LIF/SIK1	2
GO_BP_MM_REGULATION_OF_INSULIN_SECRETION	GO_BP_MM_REGULATION_OF_INSULIN_SECRETION	2/839	25/17799	0.33112	0.670618	0.573214	CNR1/TNF	2
GO_CC_MM_GOLGI_STACK	GO_CC_MM_GOLGI_STACK	2/839	25/17799	0.33112	0.670618	0.573214	SULF2/LPCAT2	2
GO_MF_MM_REPRESSING_TRANSCRIPTION_FACTOR_BINDING	GO_MF_MM_REPRESSING_TRANSCRIPTION_FACTOR_BINDING	2/839	25/17799	0.33112	0.670618	0.573214	RUNX1/GMNN	2
GO_MF_MM_RRNA_BINDING	GO_MF_MM_RRNA_BINDING	2/839	25/17799	0.33112	0.670618	0.573214	ERI1/MRPL20	2
GO_MF_MM_TRANSLATION_ELONGATION_FACTOR_ACTIVITY	GO_MF_MM_TRANSLATION_ELONGATION_FACTOR_ACTIVITY	2/839	25/17799	0.33112	0.670618	0.573214	EIF5A/EFTUD2	2
GO_BP_MM_KIDNEY_DEVELOPMENT	GO_BP_MM_KIDNEY_DEVELOPMENT	6/839	100/17799	0.332532	0.672666	0.574965	SULF2/PCSK9/CAR2/ACE/BAX/TGFBR1	6
GO_MF_MM_ACID-AMINO_ACID_LIGASE_ACTIVITY	GO_MF_MM_ACID-AMINO_ACID_LIGASE_ACTIVITY	5/839	81/17799	0.334674	0.6734	0.575592	UBE2C/UBE2T/G2E3/CDC34/UBE2F	5
GO_BP_MM_CELLULAR_RESPONSE_TO_INSULIN_STIMULUS	GO_BP_MM_CELLULAR_RESPONSE_TO_INSULIN_STIMULUS	4/839	62/17799	0.334898	0.6734	0.575592	PCSK9/INHBB/AKT1/PPAT	4
GO_BP_MM_FATTY_ACID_METABOLIC_PROCESS	GO_BP_MM_FATTY_ACID_METABOLIC_PROCESS	4/839	62/17799	0.334898	0.6734	0.575592	STAT5A/AACS/LPIN2/ACSL4	4
GO_BP_MM_GLUCOSE_METABOLIC_PROCESS	GO_BP_MM_GLUCOSE_METABOLIC_PROCESS	4/839	62/17799	0.334898	0.6734	0.575592	HK2/TNF/FABP5/AKT1	4
GO_BP_MM_REGULATION_OF_PROTEOLYSIS	GO_BP_MM_REGULATION_OF_PROTEOLYSIS	4/839	62/17799	0.334898	0.6734	0.575592	SERPINA7/SERPINA1B/SERPINB1A/SERPINB6B	4
GO_BP_MM_HEART_DEVELOPMENT	GO_BP_MM_HEART_DEVELOPMENT	10/839	179/17799	0.336726	0.676267	0.578043	TNNT2/HEG1/PDGFB/VCAM1/MRE11A/PAM/ADM/SH3PXD2B/TGFBR1/PCNA	10
GO_BP_MM_GLYCOLYSIS	GO_BP_MM_GLYCOLYSIS	3/839	44/17799	0.343805	0.689661	0.589491	HK2/LDHA/PGK1	3
GO_BP_MM_NEURAL_TUBE_CLOSURE	GO_BP_MM_NEURAL_TUBE_CLOSURE	4/839	63/17799	0.345729	0.691871	0.591379	APAF1/VANGL2/ADM/PFN1	4
GO_CC_MM_INTERMEDIATE_FILAMENT	GO_CC_MM_INTERMEDIATE_FILAMENT	4/839	63/17799	0.345729	0.691871	0.591379	KRT20/EIF6/NME1/KRT17	4
GO_BP_MM_ADRENAL_GLAND_DEVELOPMENT	GO_BP_MM_ADRENAL_GLAND_DEVELOPMENT	2/839	26/17799	0.348568	0.692378	0.591813	DKK3/TSPO	2
GO_BP_MM_B_CELL_RECEPTOR_SIGNALING_PATHWAY	GO_BP_MM_B_CELL_RECEPTOR_SIGNALING_PATHWAY	2/839	26/17799	0.348568	0.692378	0.591813	CD38/PLCG2	2
GO_BP_MM_REGULATION_OF_ACTIN_CYTOSKELETON_ORGANIZATION	GO_BP_MM_REGULATION_OF_ACTIN_CYTOSKELETON_ORGANIZATION	2/839	26/17799	0.348568	0.692378	0.591813	EFNA5/VANGL2	2
GO_BP_MM_REGULATION_OF_SYNAPTIC_PLASTICITY	GO_BP_MM_REGULATION_OF_SYNAPTIC_PLASTICITY	2/839	26/17799	0.348568	0.692378	0.591813	PLAT/BDNF	2
GO_MF_MM_ASPARTIC-TYPE_ENDOPEPTIDASE_ACTIVITY	GO_MF_MM_ASPARTIC-TYPE_ENDOPEPTIDASE_ACTIVITY	2/839	26/17799	0.348568	0.692378	0.591813	CTSE/BACE2	2
GO_MF_MM_FOUR-WAY_JUNCTION_HELICASE_ACTIVITY	GO_MF_MM_FOUR-WAY_JUNCTION_HELICASE_ACTIVITY	2/839	26/17799	0.348568	0.692378	0.591813	BLM/FIGNL1	2
GO_MF_MM_OXIDOREDUCTASE_ACTIVITY	GO_MF_MM_OXIDOREDUCTASE_ACTIVITY	18/839	342/17799	0.349089	0.692378	0.591813	GPX8/RRM2/STEAP1/STEAP4/GSTO1/HSD11B2/EGLN3/ALDH1A7/HMOX1/HSD17B2/LDHA/RDH13/GALE/GSR/SMOX/TXNRD1/NMRAL1/RDH10	18
GO_CC_MM_TIGHT_JUNCTION	GO_CC_MM_TIGHT_JUNCTION	6/839	103/17799	0.357887	0.692378	0.591813	ECT2/CLDN2/CLDN4/TGFBR1/TJAP1/ARHGEF2	6
GO_BP_MM_ER-ASSOCIATED_PROTEIN_CATABOLIC_PROCESS	GO_BP_MM_ER-ASSOCIATED_PROTEIN_CATABOLIC_PROCESS	2/839	27/17799	0.365859	0.692378	0.591813	FBXO2/DNAJC10	2
GO_BP_MM_EYE_DEVELOPMENT	GO_BP_MM_EYE_DEVELOPMENT	2/839	27/17799	0.365859	0.692378	0.591813	INHBB/SH3PXD2B	2
GO_BP_MM_LENS_DEVELOPMENT_IN_CAMERA-TYPE_EYE	GO_BP_MM_LENS_DEVELOPMENT_IN_CAMERA-TYPE_EYE	2/839	27/17799	0.365859	0.692378	0.591813	MAF/TGFBR1	2
GO_BP_MM_NEGATIVE_REGULATION_OF_CELL_DEATH	GO_BP_MM_NEGATIVE_REGULATION_OF_CELL_DEATH	2/839	27/17799	0.365859	0.692378	0.591813	CCL5/TNFAIP3	2
GO_BP_MM_RESPONSE_TO_STARVATION	GO_BP_MM_RESPONSE_TO_STARVATION	2/839	27/17799	0.365859	0.692378	0.591813	ADM/AACS	2
GO_BP_MM_VENTRICULAR_CARDIAC_MUSCLE_TISSUE_MORPHOGENESIS	GO_BP_MM_VENTRICULAR_CARDIAC_MUSCLE_TISSUE_MORPHOGENESIS	2/839	27/17799	0.365859	0.692378	0.591813	TNNT2/TPM1	2
GO_MF_MM_DNA-DIRECTED_DNA_POLYMERASE_ACTIVITY	GO_MF_MM_DNA-DIRECTED_DNA_POLYMERASE_ACTIVITY	2/839	27/17799	0.365859	0.692378	0.591813	POLE2/POLE	2
GO_MF_MM_PEPTIDE_HORMONE_BINDING	GO_MF_MM_PEPTIDE_HORMONE_BINDING	2/839	27/17799	0.365859	0.692378	0.591813	MAS1/IDE	2
GO_MF_MM_VOLTAGE-GATED_CALCIUM_CHANNEL_ACTIVITY	GO_MF_MM_VOLTAGE-GATED_CALCIUM_CHANNEL_ACTIVITY	2/839	27/17799	0.365859	0.692378	0.591813	ITGAV/CACNB3	2
GO_CC_MM_CYTOPLASMIC_MEMBRANE-BOUNDED_VESICLE	GO_CC_MM_CYTOPLASMIC_MEMBRANE-BOUNDED_VESICLE	6/839	104/17799	0.366371	0.692378	0.591813	TFRC/OPTN/HAP1/BDNF/AGFG1/DST	6
GO_MF_MM_TRANSPORTER_ACTIVITY	GO_MF_MM_TRANSPORTER_ACTIVITY	11/839	204/17799	0.367536	0.692378	0.591813	SLC4A11/LCN2/SYT8/RBP1/FABP5/SLC4A7/SLC11A2/SEC14L2/SLC4A4/SLC25A5/IGF2R	11
GO_BP_MM_NUCLEOSOME_ASSEMBLY	GO_BP_MM_NUCLEOSOME_ASSEMBLY	7/839	124/17799	0.368069	0.692378	0.591813	HIST1H4I/ASF1B/CENPA/MCM2/HIST1H1C/H2AFZ/H1FX	7
GO_BP_MM_RESPONSE_TO_VIRUS	GO_BP_MM_RESPONSE_TO_VIRUS	7/839	124/17799	0.368069	0.692378	0.591813	LCN2/CDK6/TNF/CCL5/IL23A/RSAD2/DDX21	7
GO_BP_MM_CEREBRAL_CORTEX_DEVELOPMENT	GO_BP_MM_CEREBRAL_CORTEX_DEVELOPMENT	3/839	46/17799	0.369881	0.692378	0.591813	TACC3/BAX/PTPRS	3
GO_BP_MM_EMBRYONIC_DIGIT_MORPHOGENESIS	GO_BP_MM_EMBRYONIC_DIGIT_MORPHOGENESIS	3/839	46/17799	0.369881	0.692378	0.591813	WNT7A/MYCN/LNP	3
GO_BP_MM_ION_TRANSPORT	GO_BP_MM_ION_TRANSPORT	11/839	205/17799	0.373568	0.692378	0.591813	P2RX2/FXYD6/FXYD5/SCN8A/STEAP1/SLC12A2/STEAP4/GABRP/PLLP/MRS2/ITPR3	11
GO_BP_MM_NOTCH_SIGNALING_PATHWAY	GO_BP_MM_NOTCH_SIGNALING_PATHWAY	4/839	66/17799	0.378228	0.692378	0.591813	CDK6/EFNB2/EPN2/WDR12	4
GO_MF_MM_CYSTEINE-TYPE_PEPTIDASE_ACTIVITY	GO_MF_MM_CYSTEINE-TYPE_PEPTIDASE_ACTIVITY	5/839	86/17799	0.381899	0.692378	0.591813	CTLA2B/ESPL1/CTLA2A/CASP4/TINAGL1	5
GO_CC_MM_CHLORIDE_CHANNEL_COMPLEX	GO_CC_MM_CHLORIDE_CHANNEL_COMPLEX	3/839	47/17799	0.382852	0.692378	0.591813	ANO9/GABRP/TTYH2	3
GO_BP_MM_CELLULAR_AMINO_ACID_METABOLIC_PROCESS	GO_BP_MM_CELLULAR_AMINO_ACID_METABOLIC_PROCESS	2/839	28/17799	0.38297	0.692378	0.591813	ASNS/CAD	2
GO_BP_MM_PROTEIN_DEUBIQUITINATION	GO_BP_MM_PROTEIN_DEUBIQUITINATION	2/839	28/17799	0.38297	0.692378	0.591813	UCHL1/TNFAIP3	2
GO_BP_MM_RNA_METABOLIC_PROCESS	GO_BP_MM_RNA_METABOLIC_PROCESS	2/839	28/17799	0.38297	0.692378	0.591813	NCBP1/BZW2	2
GO_CC_MM_EXTRINSIC_TO_MEMBRANE	GO_CC_MM_EXTRINSIC_TO_MEMBRANE	2/839	28/17799	0.38297	0.692378	0.591813	MSN/EPB4.1L2	2
GO_MF_MM_AMINOPEPTIDASE_ACTIVITY	GO_MF_MM_AMINOPEPTIDASE_ACTIVITY	2/839	28/17799	0.38297	0.692378	0.591813	XPNPEP1/METAP1	2
GO_BP_MM_ACROSOME_ASSEMBLY	GO_BP_MM_ACROSOME_ASSEMBLY	1/839	10/17799	0.383053	0.692378	0.591813	AGFG1	1
GO_BP_MM_ACTIN_FILAMENT_POLYMERIZATION	GO_BP_MM_ACTIN_FILAMENT_POLYMERIZATION	1/839	10/17799	0.383053	0.692378	0.591813	GSN	1
GO_BP_MM_ACTIVATION_OF_PROTEIN_KINASE_B_ACTIVITY	GO_BP_MM_ACTIVATION_OF_PROTEIN_KINASE_B_ACTIVITY	1/839	10/17799	0.383053	0.692378	0.591813	PDGFB	1
GO_BP_MM_ACTIVIN_RECEPTOR_SIGNALING_PATHWAY	GO_BP_MM_ACTIVIN_RECEPTOR_SIGNALING_PATHWAY	1/839	10/17799	0.383053	0.692378	0.591813	INHBB	1
GO_BP_MM_ADAPTIVE_IMMUNE_RESPONSE	GO_BP_MM_ADAPTIVE_IMMUNE_RESPONSE	1/839	10/17799	0.383053	0.692378	0.591813	TNFRSF11A	1
GO_BP_MM_CALCIUM-DEPENDENT_CELL-CELL_ADHESION	GO_BP_MM_CALCIUM-DEPENDENT_CELL-CELL_ADHESION	1/839	10/17799	0.383053	0.692378	0.591813	CDH17	1
GO_BP_MM_CELL_CYCLE_CHECKPOINT	GO_BP_MM_CELL_CYCLE_CHECKPOINT	1/839	10/17799	0.383053	0.692378	0.591813	MRE11A	1
GO_BP_MM_EMBRYONIC_CAMERA-TYPE_EYE_DEVELOPMENT	GO_BP_MM_EMBRYONIC_CAMERA-TYPE_EYE_DEVELOPMENT	1/839	10/17799	0.383053	0.692378	0.591813	RDH10	1
GO_BP_MM_EMBRYONIC_VISCEROCRANIUM_MORPHOGENESIS	GO_BP_MM_EMBRYONIC_VISCEROCRANIUM_MORPHOGENESIS	1/839	10/17799	0.383053	0.692378	0.591813	RDH10	1
GO_BP_MM_EPIDERMIS_MORPHOGENESIS	GO_BP_MM_EPIDERMIS_MORPHOGENESIS	1/839	10/17799	0.383053	0.692378	0.591813	WNT10A	1
GO_BP_MM_ESTABLISHMENT_OF_EPITHELIAL_CELL_POLARITY	GO_BP_MM_ESTABLISHMENT_OF_EPITHELIAL_CELL_POLARITY	1/839	10/17799	0.383053	0.692378	0.591813	VANGL2	1
GO_BP_MM_ESTABLISHMENT_OF_PLANAR_POLARITY	GO_BP_MM_ESTABLISHMENT_OF_PLANAR_POLARITY	1/839	10/17799	0.383053	0.692378	0.591813	VANGL2	1
GO_BP_MM_GLUTAMATE_METABOLIC_PROCESS	GO_BP_MM_GLUTAMATE_METABOLIC_PROCESS	1/839	10/17799	0.383053	0.692378	0.591813	GCLC	1
GO_BP_MM_GLUTATHIONE_BIOSYNTHETIC_PROCESS	GO_BP_MM_GLUTATHIONE_BIOSYNTHETIC_PROCESS	1/839	10/17799	0.383053	0.692378	0.591813	GCLC	1
GO_BP_MM_HEART_CONTRACTION	GO_BP_MM_HEART_CONTRACTION	1/839	10/17799	0.383053	0.692378	0.591813	ACE	1
GO_BP_MM_INTRACELLULAR_TRANSPORT	GO_BP_MM_INTRACELLULAR_TRANSPORT	1/839	10/17799	0.383053	0.692378	0.591813	RANBP1	1
GO_BP_MM_IRON-SULFUR_CLUSTER_ASSEMBLY	GO_BP_MM_IRON-SULFUR_CLUSTER_ASSEMBLY	1/839	10/17799	0.383053	0.692378	0.591813	NUBP1	1
GO_BP_MM_LENS_FIBER_CELL_DIFFERENTIATION	GO_BP_MM_LENS_FIBER_CELL_DIFFERENTIATION	1/839	10/17799	0.383053	0.692378	0.591813	MAF	1
GO_BP_MM_LONG_TERM_SYNAPTIC_DEPRESSION	GO_BP_MM_LONG_TERM_SYNAPTIC_DEPRESSION	1/839	10/17799	0.383053	0.692378	0.591813	CD38	1
GO_BP_MM_MAMMARY_GLAND_INVOLUTION	GO_BP_MM_MAMMARY_GLAND_INVOLUTION	1/839	10/17799	0.383053	0.692378	0.591813	STAT5A	1
GO_BP_MM_NEGATIVE_REGULATION_BY_HOST_OF_VIRAL_TRANSCRIPTION	GO_BP_MM_NEGATIVE_REGULATION_BY_HOST_OF_VIRAL_TRANSCRIPTION	1/839	10/17799	0.383053	0.692378	0.591813	CCL5	1
GO_BP_MM_NEGATIVE_REGULATION_OF_CALCIUM_ION_TRANSPORT_VIA_VOLTAGE-GATED_CALCIUM_CHANNEL_ACTIVITY	GO_BP_MM_NEGATIVE_REGULATION_OF_CALCIUM_ION_TRANSPORT_VIA_VOLTAGE-GATED_CALCIUM_CHANNEL_ACTIVITY	1/839	10/17799	0.383053	0.692378	0.591813	ITGAV	1
GO_BP_MM_NEGATIVE_REGULATION_OF_PROTEIN_SECRETION	GO_BP_MM_NEGATIVE_REGULATION_OF_PROTEIN_SECRETION	1/839	10/17799	0.383053	0.692378	0.591813	RSAD2	1
GO_BP_MM_NEGATIVE_REGULATION_OF_REACTIVE_OXYGEN_SPECIES_METABOLIC_PROCESS	GO_BP_MM_NEGATIVE_REGULATION_OF_REACTIVE_OXYGEN_SPECIES_METABOLIC_PROCESS	1/839	10/17799	0.383053	0.692378	0.591813	MYCN	1
GO_BP_MM_NEGATIVE_REGULATION_OF_S_PHASE_OF_MITOTIC_CELL_CYCLE	GO_BP_MM_NEGATIVE_REGULATION_OF_S_PHASE_OF_MITOTIC_CELL_CYCLE	1/839	10/17799	0.383053	0.692378	0.591813	DCUN1D3	1
GO_BP_MM_OOCYTE_DEVELOPMENT	GO_BP_MM_OOCYTE_DEVELOPMENT	1/839	10/17799	0.383053	0.692378	0.591813	INHBB	1
GO_BP_MM_OUTFLOW_TRACT_SEPTUM_MORPHOGENESIS	GO_BP_MM_OUTFLOW_TRACT_SEPTUM_MORPHOGENESIS	1/839	10/17799	0.383053	0.692378	0.591813	VANGL2	1
GO_BP_MM_PERICARDIUM_DEVELOPMENT	GO_BP_MM_PERICARDIUM_DEVELOPMENT	1/839	10/17799	0.383053	0.692378	0.591813	HEG1	1
GO_BP_MM_PHOSPHATE-CONTAINING_COMPOUND_METABOLIC_PROCESS	GO_BP_MM_PHOSPHATE-CONTAINING_COMPOUND_METABOLIC_PROCESS	1/839	10/17799	0.383053	0.692378	0.591813	PPA1	1
GO_BP_MM_POSITIVE_REGULATION_OF_INTERLEUKIN-17_PRODUCTION	GO_BP_MM_POSITIVE_REGULATION_OF_INTERLEUKIN-17_PRODUCTION	1/839	10/17799	0.383053	0.692378	0.591813	IL23A	1
GO_BP_MM_POSITIVE_REGULATION_OF_INTERLEUKIN-2_PRODUCTION	GO_BP_MM_POSITIVE_REGULATION_OF_INTERLEUKIN-2_PRODUCTION	1/839	10/17799	0.383053	0.692378	0.591813	CD83	1
GO_BP_MM_POSITIVE_REGULATION_OF_PEPTIDASE_ACTIVITY	GO_BP_MM_POSITIVE_REGULATION_OF_PEPTIDASE_ACTIVITY	1/839	10/17799	0.383053	0.692378	0.591813	MMP14	1
GO_BP_MM_POSITIVE_REGULATION_OF_PROTEIN_EXPORT_FROM_NUCLEUS	GO_BP_MM_POSITIVE_REGULATION_OF_PROTEIN_EXPORT_FROM_NUCLEUS	1/839	10/17799	0.383053	0.692378	0.591813	SFN	1
GO_BP_MM_POSITIVE_REGULATION_OF_PROTEIN_IMPORT_INTO_NUCLEUS	GO_BP_MM_POSITIVE_REGULATION_OF_PROTEIN_IMPORT_INTO_NUCLEUS	1/839	10/17799	0.383053	0.692378	0.591813	ECT2	1
GO_BP_MM_POSITIVE_REGULATION_OF_PROTEIN_IMPORT_INTO_NUCLEUS_TRANSLOCATION	GO_BP_MM_POSITIVE_REGULATION_OF_PROTEIN_IMPORT_INTO_NUCLEUS_TRANSLOCATION	1/839	10/17799	0.383053	0.692378	0.591813	CDK1	1
GO_BP_MM_PROSTATE_GLAND_EPITHELIUM_MORPHOGENESIS	GO_BP_MM_PROSTATE_GLAND_EPITHELIUM_MORPHOGENESIS	1/839	10/17799	0.383053	0.692378	0.591813	STAT5A	1
GO_BP_MM_PROTEIN_MATURATION	GO_BP_MM_PROTEIN_MATURATION	1/839	10/17799	0.383053	0.692378	0.591813	TESC	1
GO_BP_MM_REGULATION_OF_EPITHELIAL_CELL_PROLIFERATION	GO_BP_MM_REGULATION_OF_EPITHELIAL_CELL_PROLIFERATION	1/839	10/17799	0.383053	0.692378	0.591813	TACSTD2	1
GO_BP_MM_REPRODUCTIVE_STRUCTURE_DEVELOPMENT	GO_BP_MM_REPRODUCTIVE_STRUCTURE_DEVELOPMENT	1/839	10/17799	0.383053	0.692378	0.591813	AHR	1
GO_BP_MM_RESPONSE_TO_HERBICIDE	GO_BP_MM_RESPONSE_TO_HERBICIDE	1/839	10/17799	0.383053	0.692378	0.591813	LCN2	1
GO_BP_MM_RESPONSE_TO_VITAMIN_E	GO_BP_MM_RESPONSE_TO_VITAMIN_E	1/839	10/17799	0.383053	0.692378	0.591813	CCNE1	1
GO_BP_MM_SALIVARY_GLAND_MORPHOGENESIS	GO_BP_MM_SALIVARY_GLAND_MORPHOGENESIS	1/839	10/17799	0.383053	0.692378	0.591813	EGFR	1
GO_BP_MM_TONGUE_DEVELOPMENT	GO_BP_MM_TONGUE_DEVELOPMENT	1/839	10/17799	0.383053	0.692378	0.591813	WNT10A	1
GO_BP_MM_TYPE_B_PANCREATIC_CELL_DEVELOPMENT	GO_BP_MM_TYPE_B_PANCREATIC_CELL_DEVELOPMENT	1/839	10/17799	0.383053	0.692378	0.591813	CDK6	1
GO_BP_MM_UTERUS_DEVELOPMENT	GO_BP_MM_UTERUS_DEVELOPMENT	1/839	10/17799	0.383053	0.692378	0.591813	WNT7A	1
GO_CC_MM_APICOLATERAL_PLASMA_MEMBRANE	GO_CC_MM_APICOLATERAL_PLASMA_MEMBRANE	1/839	10/17799	0.383053	0.692378	0.591813	CLDN4	1
GO_CC_MM_HOPS_COMPLEX	GO_CC_MM_HOPS_COMPLEX	1/839	10/17799	0.383053	0.692378	0.591813	HOOK1	1
GO_CC_MM_MEMBRANE-BOUNDED_VESICLE	GO_CC_MM_MEMBRANE-BOUNDED_VESICLE	1/839	10/17799	0.383053	0.692378	0.591813	SYT8	1
GO_CC_MM_MITOCHONDRIAL_RIBOSOME	GO_CC_MM_MITOCHONDRIAL_RIBOSOME	1/839	10/17799	0.383053	0.692378	0.591813	MRPL20	1
GO_CC_MM_VACUOLAR_MEMBRANE	GO_CC_MM_VACUOLAR_MEMBRANE	1/839	10/17799	0.383053	0.692378	0.591813	MTMR2	1
GO_CC_MM_XY_BODY	GO_CC_MM_XY_BODY	1/839	10/17799	0.383053	0.692378	0.591813	RAD18	1
GO_MF_MM_3_5-CYCLIC-AMP_PHOSPHODIESTERASE_ACTIVITY	GO_MF_MM_3_5-CYCLIC-AMP_PHOSPHODIESTERASE_ACTIVITY	1/839	10/17799	0.383053	0.692378	0.591813	PDE7A	1
GO_MF_MM_ACTIVIN_BINDING	GO_MF_MM_ACTIVIN_BINDING	1/839	10/17799	0.383053	0.692378	0.591813	FST	1
GO_MF_MM_APOLIPOPROTEIN_BINDING	GO_MF_MM_APOLIPOPROTEIN_BINDING	1/839	10/17799	0.383053	0.692378	0.591813	LRP8	1
GO_MF_MM_DNA-APURINIC_OR_APYRIMIDINIC_SITE_LYASE_ACTIVITY	GO_MF_MM_DNA-APURINIC_OR_APYRIMIDINIC_SITE_LYASE_ACTIVITY	1/839	10/17799	0.383053	0.692378	0.591813	NEIL3	1
GO_MF_MM_NUCLEOBASE-CONTAINING_COMPOUND_KINASE_ACTIVITY	GO_MF_MM_NUCLEOBASE-CONTAINING_COMPOUND_KINASE_ACTIVITY	1/839	10/17799	0.383053	0.692378	0.591813	AK4	1
GO_MF_MM_PLATELET-DERIVED_GROWTH_FACTOR_RECEPTOR_BINDING	GO_MF_MM_PLATELET-DERIVED_GROWTH_FACTOR_RECEPTOR_BINDING	1/839	10/17799	0.383053	0.692378	0.591813	PDGFB	1
GO_MF_MM_VINCULIN_BINDING	GO_MF_MM_VINCULIN_BINDING	1/839	10/17799	0.383053	0.692378	0.591813	ACTN1	1
GO_BP_MM_CARTILAGE_DEVELOPMENT	GO_BP_MM_CARTILAGE_DEVELOPMENT	4/839	67/17799	0.389035	0.692825	0.592195	CD44/SULF2/WNT7A/TYMS	4
GO_BP_MM_POSITIVE_REGULATION_OF_SEQUENCE-SPECIFIC_DNA_BINDING_TRANSCRIPTION_FACTOR_ACTIVITY	GO_BP_MM_POSITIVE_REGULATION_OF_SEQUENCE-SPECIFIC_DNA_BINDING_TRANSCRIPTION_FACTOR_ACTIVITY	4/839	67/17799	0.389035	0.692825	0.592195	TNF/TNFRSF11A/ANXA3/AKT1	4
GO_BP_MM_ENDOCYTOSIS	GO_BP_MM_ENDOCYTOSIS	6/839	107/17799	0.39186	0.692825	0.592195	LRP8/RIN1/NME1/EHD1/RIN2/EPN2	6
GO_BP_MM_NUCLEOCYTOPLASMIC_TRANSPORT	GO_BP_MM_NUCLEOCYTOPLASMIC_TRANSPORT	6/839	107/17799	0.39186	0.692825	0.592195	AAAS/RALB/RAN/RALA/EIF5A/RAB31	6
GO_BP_MM_CHOLESTEROL_HOMEOSTASIS	GO_BP_MM_CHOLESTEROL_HOMEOSTASIS	3/839	48/17799	0.395762	0.692825	0.592195	PCSK9/LDLRAP1/EHD1	3
GO_CC_MM_NUCLEAR_MATRIX	GO_CC_MM_NUCLEAR_MATRIX	4/839	68/17799	0.399816	0.692825	0.592195	BLM/CENPF/LMNB1/CAD	4
GO_BP_MM_POSITIVE_REGULATION_OF_ACTIN_FILAMENT_POLYMERIZATION	GO_BP_MM_POSITIVE_REGULATION_OF_ACTIN_FILAMENT_POLYMERIZATION	2/839	29/17799	0.399879	0.692825	0.592195	CDC42EP2/KIRREL	2
GO_BP_MM_RESPONSE_TO_TESTOSTERONE_STIMULUS	GO_BP_MM_RESPONSE_TO_TESTOSTERONE_STIMULUS	2/839	29/17799	0.399879	0.692825	0.592195	TSPO/CAD	2
GO_BP_MM_RESPONSE_TO_ZINC_ION	GO_BP_MM_RESPONSE_TO_ZINC_ION	2/839	29/17799	0.399879	0.692825	0.592195	CAR2/CRIP1	2
GO_CC_MM_VESICLE	GO_CC_MM_VESICLE	2/839	29/17799	0.399879	0.692825	0.592195	IL1RN/PF4	2
GO_MF_MM_HYDROGEN_ION_TRANSMEMBRANE_TRANSPORTER_ACTIVITY	GO_MF_MM_HYDROGEN_ION_TRANSMEMBRANE_TRANSPORTER_ACTIVITY	2/839	29/17799	0.399879	0.692825	0.592195	SLC11A2/SLC36A1	2
GO_BP_MM_NEGATIVE_REGULATION_OF_CELL_GROWTH	GO_BP_MM_NEGATIVE_REGULATION_OF_CELL_GROWTH	6/839	108/17799	0.400355	0.692825	0.592195	SERPINE2/PSRC1/DCBLD2/ZMAT3/CDA/DCUN1D3	6
GO_BP_MM_CHROMATIN_REMODELING	GO_BP_MM_CHROMATIN_REMODELING	3/839	49/17799	0.408598	0.692825	0.592195	SUV39H2/2410016O06RIK/BAZ1A	3
GO_BP_MM_REGULATION_OF_CELL_MIGRATION	GO_BP_MM_REGULATION_OF_CELL_MIGRATION	3/839	49/17799	0.408598	0.692825	0.592195	LAMA3/AKT1/VCL	3
GO_BP_MM_RESPONSE_TO_INSULIN_STIMULUS	GO_BP_MM_RESPONSE_TO_INSULIN_STIMULUS	4/839	69/17799	0.410562	0.692825	0.592195	PDGFB/HSD11B2/CCL5/ADM	4
GO_BP_MM_ACTOMYOSIN_STRUCTURE_ORGANIZATION	GO_BP_MM_ACTOMYOSIN_STRUCTURE_ORGANIZATION	1/839	11/17799	0.41215	0.692825	0.592195	CNN2	1
GO_BP_MM_CELLULAR_PROTEIN_COMPLEX_ASSEMBLY	GO_BP_MM_CELLULAR_PROTEIN_COMPLEX_ASSEMBLY	1/839	11/17799	0.41215	0.692825	0.592195	CCL5	1
GO_BP_MM_CELLULAR_RESPONSE_TO_EPIDERMAL_GROWTH_FACTOR_STIMULUS	GO_BP_MM_CELLULAR_RESPONSE_TO_EPIDERMAL_GROWTH_FACTOR_STIMULUS	1/839	11/17799	0.41215	0.692825	0.592195	AKT1	1
GO_BP_MM_DNA_DAMAGE_RESPONSE_SIGNAL_TRANSDUCTION_BY_P53_CLASS_MEDIATOR_RESULTING_IN_TRANSCRIPTION_OF_P21_CLASS_MEDIATOR	GO_BP_MM_DNA_DAMAGE_RESPONSE_SIGNAL_TRANSDUCTION_BY_P53_CLASS_MEDIATOR_RESULTING_IN_TRANSCRIPTION_OF_P21_CLASS_MEDIATOR	1/839	11/17799	0.41215	0.692825	0.592195	FOXM1	1
GO_BP_MM_EAR_DEVELOPMENT	GO_BP_MM_EAR_DEVELOPMENT	1/839	11/17799	0.41215	0.692825	0.592195	RDH10	1
GO_BP_MM_FIBRINOLYSIS	GO_BP_MM_FIBRINOLYSIS	1/839	11/17799	0.41215	0.692825	0.592195	ANXA2	1
GO_BP_MM_INDUCTION_OF_POSITIVE_CHEMOTAXIS	GO_BP_MM_INDUCTION_OF_POSITIVE_CHEMOTAXIS	1/839	11/17799	0.41215	0.692825	0.592195	ARTN	1
GO_BP_MM_LUNG-ASSOCIATED_MESENCHYME_DEVELOPMENT	GO_BP_MM_LUNG-ASSOCIATED_MESENCHYME_DEVELOPMENT	1/839	11/17799	0.41215	0.692825	0.592195	WNT7B	1
GO_BP_MM_MACROPHAGE_DIFFERENTIATION	GO_BP_MM_MACROPHAGE_DIFFERENTIATION	1/839	11/17799	0.41215	0.692825	0.592195	CSF1	1
GO_BP_MM_MRNA_STABILIZATION	GO_BP_MM_MRNA_STABILIZATION	1/839	11/17799	0.41215	0.692825	0.592195	E2F1	1
GO_BP_MM_NEGATIVE_REGULATION_OF_CELL-SUBSTRATE_ADHESION	GO_BP_MM_NEGATIVE_REGULATION_OF_CELL-SUBSTRATE_ADHESION	1/839	11/17799	0.41215	0.692825	0.592195	LGALS1	1
GO_BP_MM_NEGATIVE_REGULATION_OF_JUN_KINASE_ACTIVITY	GO_BP_MM_NEGATIVE_REGULATION_OF_JUN_KINASE_ACTIVITY	1/839	11/17799	0.41215	0.692825	0.592195	BC021614	1
GO_BP_MM_NEGATIVE_REGULATION_OF_LIPID_CATABOLIC_PROCESS	GO_BP_MM_NEGATIVE_REGULATION_OF_LIPID_CATABOLIC_PROCESS	1/839	11/17799	0.41215	0.692825	0.592195	TNF	1
GO_BP_MM_NEGATIVE_REGULATION_OF_LIPID_STORAGE	GO_BP_MM_NEGATIVE_REGULATION_OF_LIPID_STORAGE	1/839	11/17799	0.41215	0.692825	0.592195	ITGAV	1
GO_BP_MM_NEGATIVE_REGULATION_OF_MYOBLAST_DIFFERENTIATION	GO_BP_MM_NEGATIVE_REGULATION_OF_MYOBLAST_DIFFERENTIATION	1/839	11/17799	0.41215	0.692825	0.592195	MBNL3	1
GO_BP_MM_NEGATIVE_REGULATION_OF_VASCULAR_PERMEABILITY	GO_BP_MM_NEGATIVE_REGULATION_OF_VASCULAR_PERMEABILITY	1/839	11/17799	0.41215	0.692825	0.592195	ADM	1
GO_BP_MM_NEURON_FATE_SPECIFICATION	GO_BP_MM_NEURON_FATE_SPECIFICATION	1/839	11/17799	0.41215	0.692825	0.592195	FOXA3	1
GO_BP_MM_OVULATION	GO_BP_MM_OVULATION	1/839	11/17799	0.41215	0.692825	0.592195	PTGS2	1
GO_BP_MM_OVULATION_CYCLE	GO_BP_MM_OVULATION_CYCLE	1/839	11/17799	0.41215	0.692825	0.592195	AXL	1
GO_BP_MM_PHOSPHATIDYLINOSITOL_BIOSYNTHETIC_PROCESS	GO_BP_MM_PHOSPHATIDYLINOSITOL_BIOSYNTHETIC_PROCESS	1/839	11/17799	0.41215	0.692825	0.592195	PLCG2	1
GO_BP_MM_POSITIVE_REGULATION_OF_ALPHA-BETA_T_CELL_PROLIFERATION	GO_BP_MM_POSITIVE_REGULATION_OF_ALPHA-BETA_T_CELL_PROLIFERATION	1/839	11/17799	0.41215	0.692825	0.592195	BLM	1
GO_BP_MM_POSITIVE_REGULATION_OF_B_CELL_DIFFERENTIATION	GO_BP_MM_POSITIVE_REGULATION_OF_B_CELL_DIFFERENTIATION	1/839	11/17799	0.41215	0.692825	0.592195	STAT5A	1
GO_BP_MM_POSITIVE_REGULATION_OF_CARTILAGE_DEVELOPMENT	GO_BP_MM_POSITIVE_REGULATION_OF_CARTILAGE_DEVELOPMENT	1/839	11/17799	0.41215	0.692825	0.592195	BMP1	1
GO_BP_MM_POSITIVE_REGULATION_OF_CREB_TRANSCRIPTION_FACTOR_ACTIVITY	GO_BP_MM_POSITIVE_REGULATION_OF_CREB_TRANSCRIPTION_FACTOR_ACTIVITY	1/839	11/17799	0.41215	0.692825	0.592195	LRP8	1
GO_BP_MM_POSITIVE_REGULATION_OF_INTERLEUKIN-2_BIOSYNTHETIC_PROCESS	GO_BP_MM_POSITIVE_REGULATION_OF_INTERLEUKIN-2_BIOSYNTHETIC_PROCESS	1/839	11/17799	0.41215	0.692825	0.592195	STAT5A	1
GO_BP_MM_POSITIVE_REGULATION_OF_MICROTUBULE_POLYMERIZATION	GO_BP_MM_POSITIVE_REGULATION_OF_MICROTUBULE_POLYMERIZATION	1/839	11/17799	0.41215	0.692825	0.592195	PSRC1	1
GO_BP_MM_POSITIVE_REGULATION_OF_NITRIC-OXIDE_SYNTHASE_ACTIVITY	GO_BP_MM_POSITIVE_REGULATION_OF_NITRIC-OXIDE_SYNTHASE_ACTIVITY	1/839	11/17799	0.41215	0.692825	0.592195	AKT1	1
GO_BP_MM_POSITIVE_REGULATION_OF_PROTEIN_COMPLEX_ASSEMBLY	GO_BP_MM_POSITIVE_REGULATION_OF_PROTEIN_COMPLEX_ASSEMBLY	1/839	11/17799	0.41215	0.692825	0.592195	TNF	1
GO_BP_MM_PROTEIN_HETEROTRIMERIZATION	GO_BP_MM_PROTEIN_HETEROTRIMERIZATION	1/839	11/17799	0.41215	0.692825	0.592195	C1QTNF6	1
GO_BP_MM_PROTEIN_METABOLIC_PROCESS	GO_BP_MM_PROTEIN_METABOLIC_PROCESS	1/839	11/17799	0.41215	0.692825	0.592195	OTUB1	1
GO_BP_MM_PROTEIN_SECRETION	GO_BP_MM_PROTEIN_SECRETION	1/839	11/17799	0.41215	0.692825	0.592195	CXCL10	1
GO_BP_MM_REGULATION_OF_CELL_SIZE	GO_BP_MM_REGULATION_OF_CELL_SIZE	1/839	11/17799	0.41215	0.692825	0.592195	IQGAP3	1
GO_BP_MM_REGULATION_OF_CYTOKINESIS	GO_BP_MM_REGULATION_OF_CYTOKINESIS	1/839	11/17799	0.41215	0.692825	0.592195	CALM1	1
GO_BP_MM_REMOVAL_OF_SUPEROXIDE_RADICALS	GO_BP_MM_REMOVAL_OF_SUPEROXIDE_RADICALS	1/839	11/17799	0.41215	0.692825	0.592195	FANCC	1
GO_BP_MM_RESPONSE_TO_ARSENIC-CONTAINING_SUBSTANCE	GO_BP_MM_RESPONSE_TO_ARSENIC-CONTAINING_SUBSTANCE	1/839	11/17799	0.41215	0.692825	0.592195	GCLC	1
GO_BP_MM_RESPONSE_TO_METHYLMERCURY	GO_BP_MM_RESPONSE_TO_METHYLMERCURY	1/839	11/17799	0.41215	0.692825	0.592195	CCNE1	1
GO_BP_MM_RESPONSE_TO_SELENIUM_ION	GO_BP_MM_RESPONSE_TO_SELENIUM_ION	1/839	11/17799	0.41215	0.692825	0.592195	GPX3	1
GO_BP_MM_SENSORY_PERCEPTION_OF_LIGHT_STIMULUS	GO_BP_MM_SENSORY_PERCEPTION_OF_LIGHT_STIMULUS	1/839	11/17799	0.41215	0.692825	0.592195	WHRN	1
GO_BP_MM_SKELETAL_MUSCLE_CELL_DIFFERENTIATION	GO_BP_MM_SKELETAL_MUSCLE_CELL_DIFFERENTIATION	1/839	11/17799	0.41215	0.692825	0.592195	NUPR1	1
GO_BP_MM_SUPEROXIDE_ANION_GENERATION	GO_BP_MM_SUPEROXIDE_ANION_GENERATION	1/839	11/17799	0.41215	0.692825	0.592195	CYBA	1
GO_BP_MM_SURFACTANT_HOMEOSTASIS	GO_BP_MM_SURFACTANT_HOMEOSTASIS	1/839	11/17799	0.41215	0.692825	0.592195	SFTPD	1
GO_BP_MM_SYNAPSIS	GO_BP_MM_SYNAPSIS	1/839	11/17799	0.41215	0.692825	0.592195	MRE11A	1
GO_BP_MM_WNT_RECEPTOR_SIGNALING_PATHWAY_PLANAR_CELL_POLARITY_PATHWAY	GO_BP_MM_WNT_RECEPTOR_SIGNALING_PATHWAY_PLANAR_CELL_POLARITY_PATHWAY	1/839	11/17799	0.41215	0.692825	0.592195	VANGL2	1
GO_CC_MM_FANCONI_ANAEMIA_NUCLEAR_COMPLEX	GO_CC_MM_FANCONI_ANAEMIA_NUCLEAR_COMPLEX	1/839	11/17799	0.41215	0.692825	0.592195	FANCC	1
GO_CC_MM_HOLO_TFIIH_COMPLEX	GO_CC_MM_HOLO_TFIIH_COMPLEX	1/839	11/17799	0.41215	0.692825	0.592195	GTF2H2	1
GO_CC_MM_PHAGOCYTIC_VESICLE_MEMBRANE	GO_CC_MM_PHAGOCYTIC_VESICLE_MEMBRANE	1/839	11/17799	0.41215	0.692825	0.592195	ANXA3	1
GO_CC_MM_TRANS-GOLGI_NETWORK_TRANSPORT_VESICLE	GO_CC_MM_TRANS-GOLGI_NETWORK_TRANSPORT_VESICLE	1/839	11/17799	0.41215	0.692825	0.592195	IGF2R	1
GO_CC_MM_TRANSCRIPTION_ELONGATION_FACTOR_COMPLEX	GO_CC_MM_TRANSCRIPTION_ELONGATION_FACTOR_COMPLEX	1/839	11/17799	0.41215	0.692825	0.592195	ELL3	1
GO_MF_MM_ANKYRIN_BINDING	GO_MF_MM_ANKYRIN_BINDING	1/839	11/17799	0.41215	0.692825	0.592195	FLNC	1
GO_MF_MM_CYCLIN-DEPENDENT_PROTEIN_KINASE_INHIBITOR_ACTIVITY	GO_MF_MM_CYCLIN-DEPENDENT_PROTEIN_KINASE_INHIBITOR_ACTIVITY	1/839	11/17799	0.41215	0.692825	0.592195	CDKN2B	1
GO_MF_MM_DYNEIN_BINDING	GO_MF_MM_DYNEIN_BINDING	1/839	11/17799	0.41215	0.692825	0.592195	CENPF	1
GO_MF_MM_HYDROLASE_ACTIVITY_ACTING_ON_GLYCOSYL_BONDS	GO_MF_MM_HYDROLASE_ACTIVITY_ACTING_ON_GLYCOSYL_BONDS	1/839	11/17799	0.41215	0.692825	0.592195	CD38	1
GO_MF_MM_I-SMAD_BINDING	GO_MF_MM_I-SMAD_BINDING	1/839	11/17799	0.41215	0.692825	0.592195	TGFBR1	1
GO_MF_MM_INSULIN-LIKE_GROWTH_FACTOR_RECEPTOR_BINDING	GO_MF_MM_INSULIN-LIKE_GROWTH_FACTOR_RECEPTOR_BINDING	1/839	11/17799	0.41215	0.692825	0.592195	SOCS2	1
GO_MF_MM_RETINOL_BINDING	GO_MF_MM_RETINOL_BINDING	1/839	11/17799	0.41215	0.692825	0.592195	RBP1	1
GO_BP_MM_CELL_PROJECTION_ORGANIZATION	GO_BP_MM_CELL_PROJECTION_ORGANIZATION	2/839	30/17799	0.416566	0.69367	0.592917	AURKA/AKT1	2
GO_BP_MM_EPHRIN_RECEPTOR_SIGNALING_PATHWAY	GO_BP_MM_EPHRIN_RECEPTOR_SIGNALING_PATHWAY	2/839	30/17799	0.416566	0.69367	0.592917	EFNA5/EFNB2	2
GO_BP_MM_NUCLEOTIDE-EXCISION_REPAIR	GO_BP_MM_NUCLEOTIDE-EXCISION_REPAIR	2/839	30/17799	0.416566	0.69367	0.592917	NEIL3/FANCC	2
GO_BP_MM_POSITIVE_REGULATION_OF_MULTICELLULAR_ORGANISM_GROWTH	GO_BP_MM_POSITIVE_REGULATION_OF_MULTICELLULAR_ORGANISM_GROWTH	2/839	30/17799	0.416566	0.69367	0.592917	CSF1/STAT5A	2
GO_BP_MM_T_CELL_RECEPTOR_SIGNALING_PATHWAY	GO_BP_MM_T_CELL_RECEPTOR_SIGNALING_PATHWAY	2/839	30/17799	0.416566	0.69367	0.592917	PLCG2/CACNB3	2
GO_MF_MM_OXIDOREDUCTASE_ACTIVITY_DONOR_AND_INCORPORATION_OF_ONE_ATOM_EACH_OF_OXYGEN_INTO_BOTH_DONORS	GO_MF_MM_OXIDOREDUCTASE_ACTIVITY_DONOR_AND_INCORPORATION_OF_ONE_ATOM_EACH_OF_OXYGEN_INTO_BOTH_DONORS	2/839	30/17799	0.416566	0.69367	0.592917	2410016O06RIK/EGLN3	2
GO_BP_MM_SODIUM_ION_TRANSPORT	GO_BP_MM_SODIUM_ION_TRANSPORT	5/839	90/17799	0.419614	0.69367	0.592917	SLC4A11/SCN8A/SCNN1A/ATP1B3/SLC4A4	5
GO_MF_MM_MRNA_BINDING	GO_MF_MM_MRNA_BINDING	3/839	50/17799	0.42135	0.69367	0.592917	DHFR/ESRP1/RBM25	3
GO_BP_MM_LIPID_METABOLIC_PROCESS	GO_BP_MM_LIPID_METABOLIC_PROCESS	7/839	131/17799	0.422516	0.69367	0.592917	IL1RN/FABP5/PLCG2/PLCXD2/AACS/LPIN2/ACSL4	7
GO_CC_MM_MICROTUBULE_ORGANIZING_CENTER	GO_CC_MM_MICROTUBULE_ORGANIZING_CENTER	5/839	91/17799	0.428989	0.69367	0.592917	KIFC1/TOPBP1/TUBG1/HAUS4/NEK7	5
GO_MF_MM_PEPTIDASE_ACTIVITY	GO_MF_MM_PEPTIDASE_ACTIVITY	7/839	132/17799	0.430276	0.69367	0.592917	ESPL1/SLPI/TFRC/CNDP2/CASP4/DESI1/BMP1	7
GO_BP_MM_REGULATION_OF_RHO_PROTEIN_SIGNAL_TRANSDUCTION	GO_BP_MM_REGULATION_OF_RHO_PROTEIN_SIGNAL_TRANSDUCTION	4/839	71/17799	0.431928	0.69367	0.592917	ECT2/ITSN2/ARHGEF2/FGD6	4
GO_BP_MM_ADULT_WALKING_BEHAVIOR	GO_BP_MM_ADULT_WALKING_BEHAVIOR	2/839	31/17799	0.433016	0.69367	0.592917	UCHL1/SCN8A	2
GO_BP_MM_DEVELOPMENTAL_GROWTH	GO_BP_MM_DEVELOPMENTAL_GROWTH	2/839	31/17799	0.433016	0.69367	0.592917	TYMS/ADM	2
GO_BP_MM_POSITIVE_REGULATION_OF_INTERFERON-GAMMA_PRODUCTION	GO_BP_MM_POSITIVE_REGULATION_OF_INTERFERON-GAMMA_PRODUCTION	2/839	31/17799	0.433016	0.69367	0.592917	TNF/IL23A	2
GO_BP_MM_POSITIVE_REGULATION_OF_PROTEIN_CATABOLIC_PROCESS	GO_BP_MM_POSITIVE_REGULATION_OF_PROTEIN_CATABOLIC_PROCESS	2/839	31/17799	0.433016	0.69367	0.592917	IER3/TNFAIP3	2
GO_BP_MM_PROTEIN_AUTOUBIQUITINATION	GO_BP_MM_PROTEIN_AUTOUBIQUITINATION	2/839	31/17799	0.433016	0.69367	0.592917	BRCA1/UBE2T	2
GO_CC_MM_MITOCHONDRIAL_NUCLEOID	GO_CC_MM_MITOCHONDRIAL_NUCLEOID	2/839	31/17799	0.433016	0.69367	0.592917	SLC25A5/LRRC59	2
GO_BP_MM_OSTEOBLAST_DIFFERENTIATION	GO_BP_MM_OSTEOBLAST_DIFFERENTIATION	3/839	51/17799	0.434008	0.69367	0.592917	FHL2/FIGNL1/AKT1	3
GO_BP_MM_ACROSOME_REACTION	GO_BP_MM_ACROSOME_REACTION	1/839	12/17799	0.439877	0.69367	0.592917	SYT8	1
GO_BP_MM_ANDROGEN_METABOLIC_PROCESS	GO_BP_MM_ANDROGEN_METABOLIC_PROCESS	1/839	12/17799	0.439877	0.69367	0.592917	ADM	1
GO_BP_MM_CELLULAR_RESPONSE_TO_VASCULAR_ENDOTHELIAL_GROWTH_FACTOR_STIMULUS	GO_BP_MM_CELLULAR_RESPONSE_TO_VASCULAR_ENDOTHELIAL_GROWTH_FACTOR_STIMULUS	1/839	12/17799	0.439877	0.69367	0.592917	FLT4	1
[truncated: 659 more rows]

## Sheet: DDC TF UP
ID	Description	GeneRatio	BgRatio	pvalue	p.adjust	qvalue	geneID	Count
[truncated: 213 more rows]

## Sheet: DDC GO DOWN
ID	Description	GeneRatio	BgRatio	pvalue	p.adjust	qvalue	geneID	Count
[truncated: 2,024 more rows]

[truncated: 7 more sheets: DDC TF DOWN, Org vs T0 GO UP, Org vs T0 TF UP, Org vs T0 Metabolic UP, Org vs T0 GO DOWN, Org vs T0 TF DOWN, Org vs T0 Metabolic DOWN]
