# Supplementary material for: Hepatic lipid overload triggers biliary epithelial cell activation via E2Fs
Source: eLife. 2023 Mar 6;12:e81926. doi: 10.7554/eLife.81926 (PMC10030116; doi:10.7554/eLife.81926)
Supplement: Supplementary file 3. [file elife-81926-supp3.xlsx]

## Sheet: Sheet1
Gene	Species	Forward	Reverse
Scd1	Mouse	TTCTTGCGATACACTCTGGTGC	CGGGATTGAATGTTCTTGTCGT
Hmgcs2	Mouse	GTGGTCTGTGGTGACATTGC	CGCAGGTAGCACTGGATAGA
Pdk4	Mouse	CCGCTGTCCATGAAGCA	GCAGAAAAGCAAAGGACGTT
Aldh1a1	Mouse	TGACCAGGTGCTTTCCATTG	TCACAACACCTGGGGAACAG
Ccnd1	Mouse	CAAGTGTGACCCGGACTGC	TTGACTCCAGAAGGGCTTCAA
Ccna2	Mouse	CAAGACTCGACGGGTTGCTC	GCTGGCCTCTTCTGAGTCTC
Rad51c	Mouse	CGGGAGTTGGTGGGTTATCC	CCGGCACATCTTGGTTTATTTGT
Foxm1	Mouse	ATCGCTACTTGACATTGGACCA	GATTGGGTCGTTTCTGCTGTG
Tpx2	Mouse	ATAGGCGAGCCTTTTCAGGG	CAACTGCCTTCAACGGTGTG
Hk1	Mouse	GAGGTCTACGACACCCCAGA	GAAGTCTCCGAGGCATTCAG
Pfkfb3	Mouse	TCATGGAATAGAGCGCC	GTGTGCTCACCGATTCTACA
Glut2	Mouse	GTCACTATGCTCTGGTCTCTG	CAAGAGGGCTCCAGTCAATG
