# Supplementary figures and images for: Hepatic lipid overload triggers biliary epithelial cell activation via E2Fs
Source: eLife journal article supplement (doi:10.7554/elife.81926), 2022-10-17

**Figure S2**

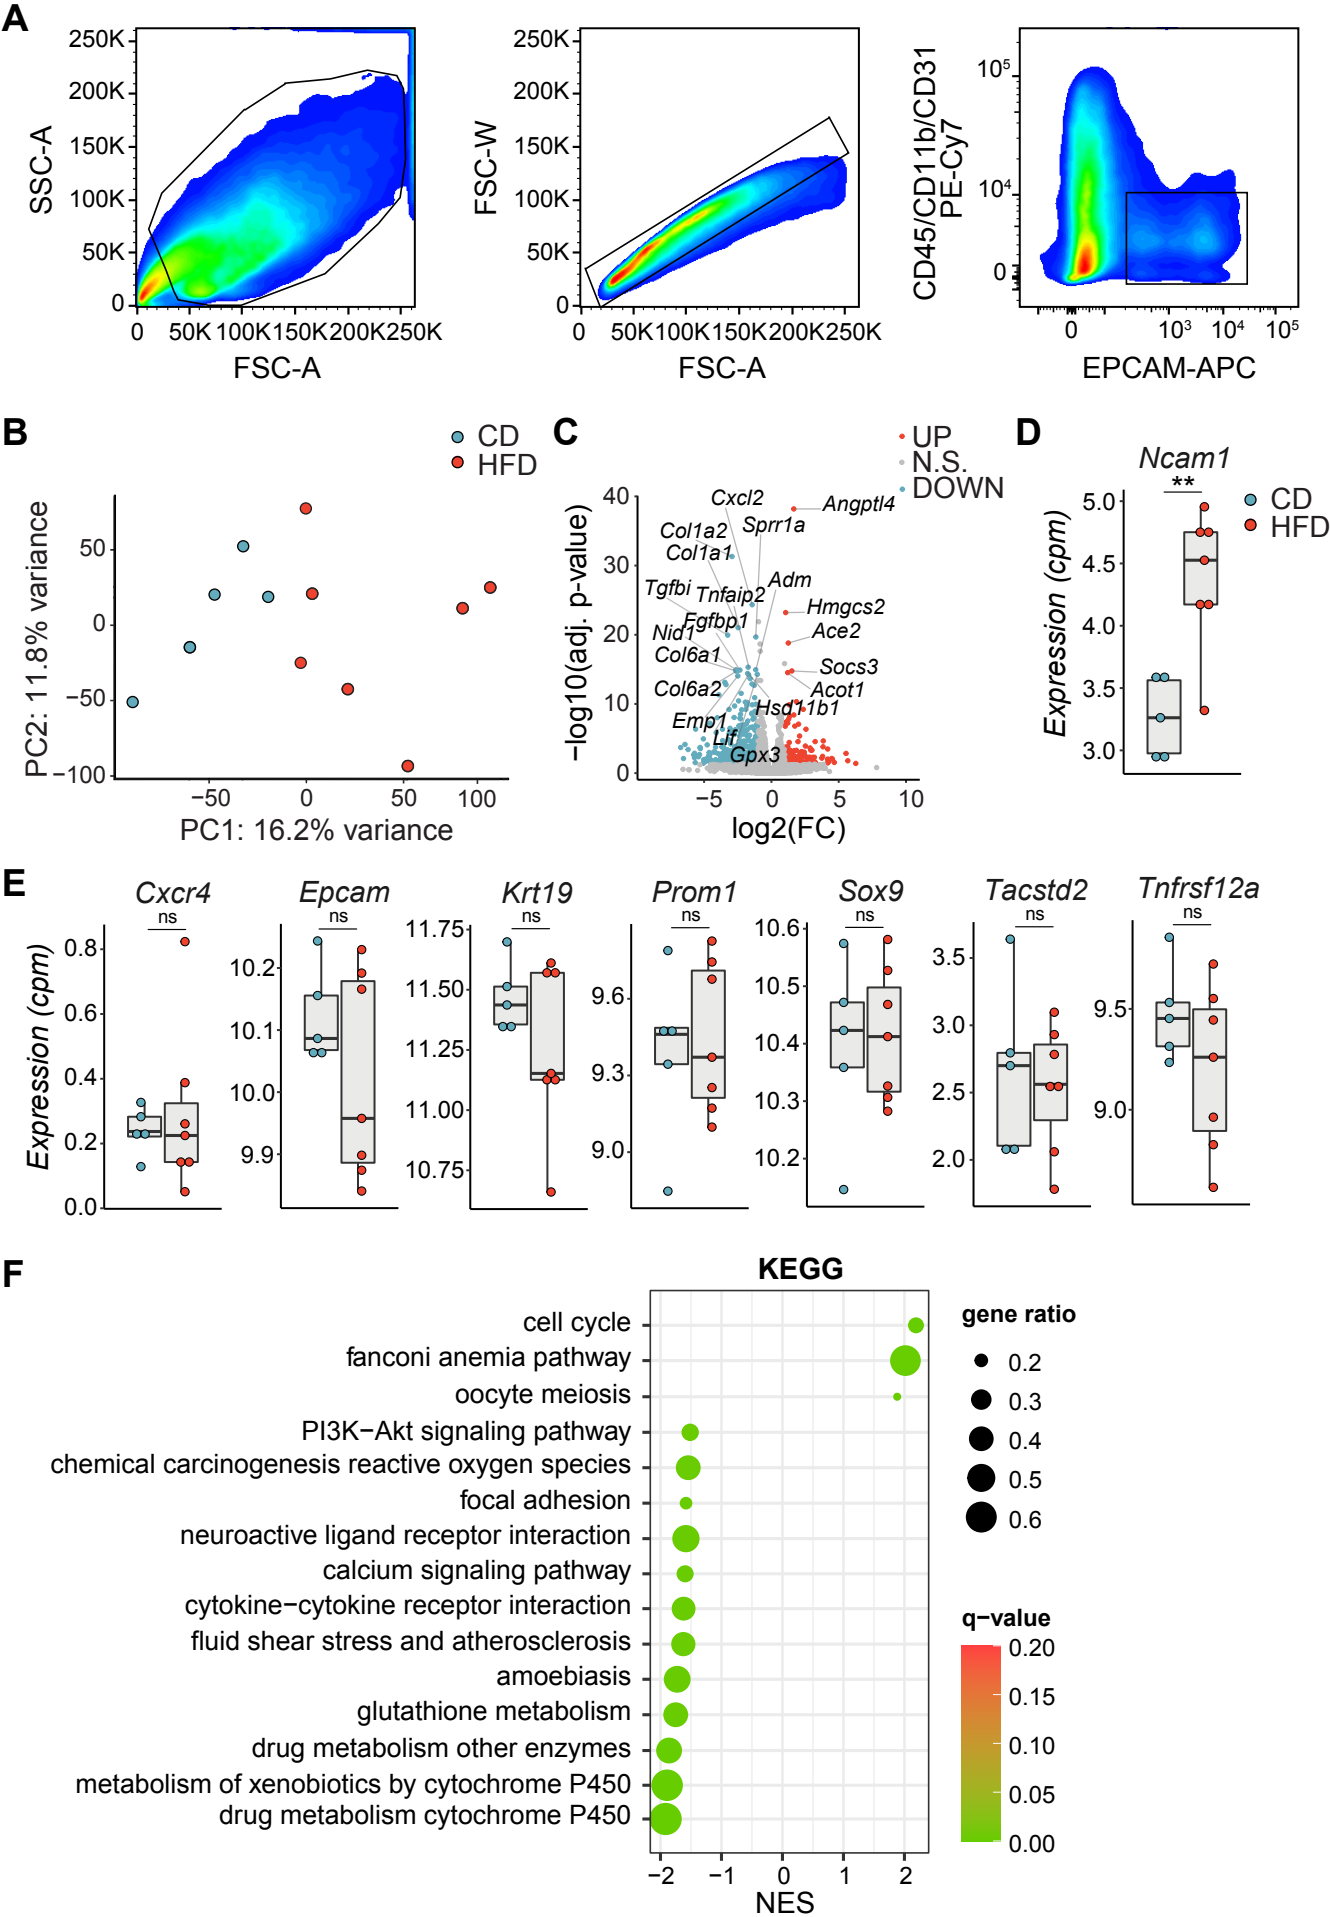

Supplement: supp [file elife-81926-supp-v1.zip]

**Figure S3**

**A**

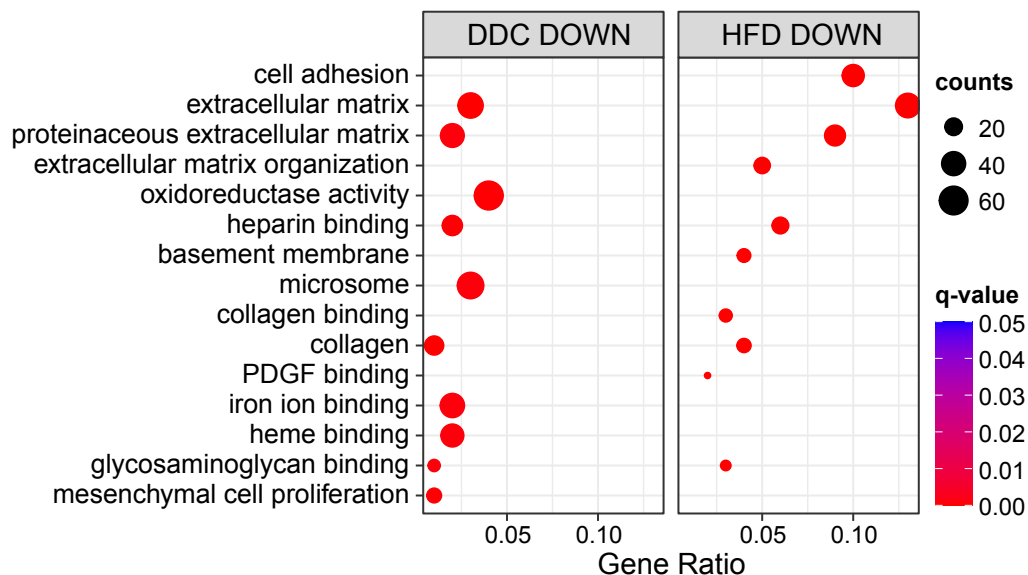

**B**

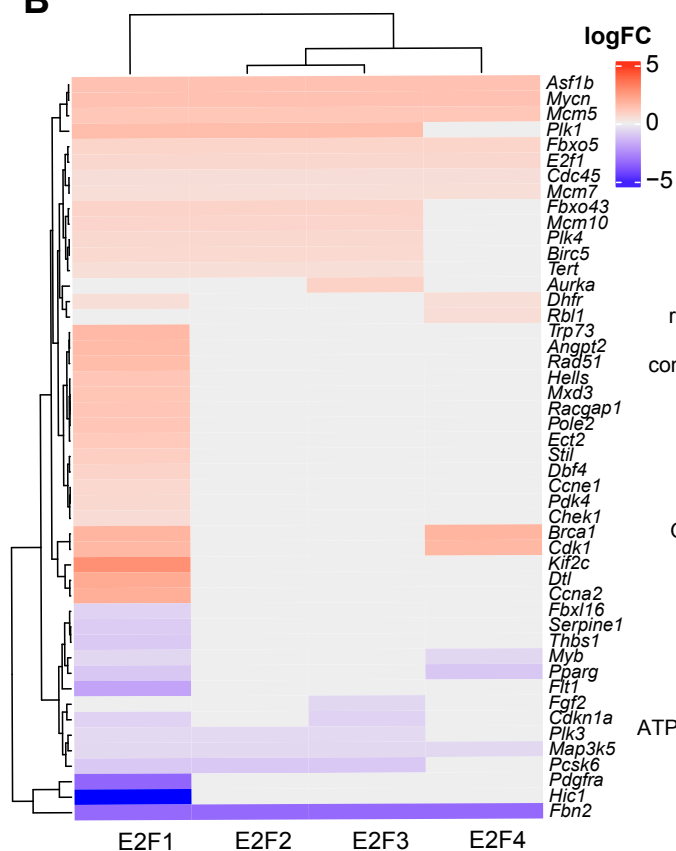

**C**

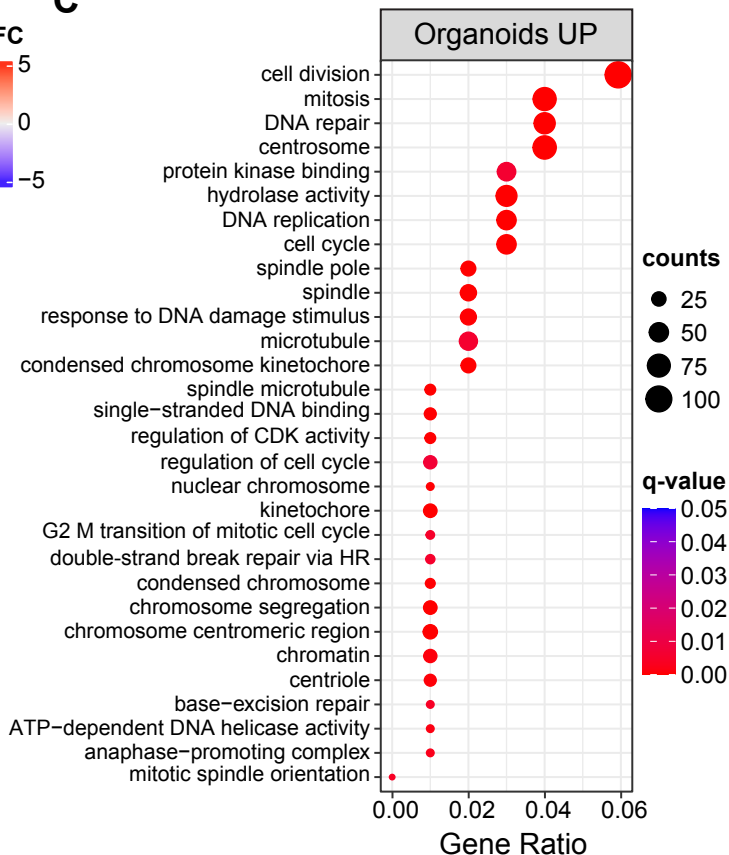

**D**

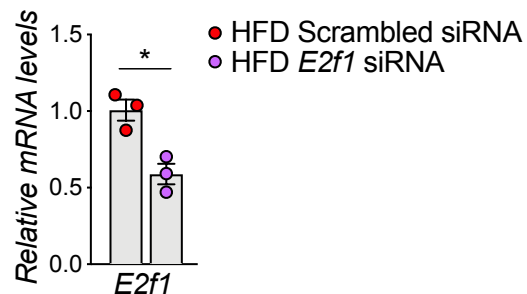

**E**

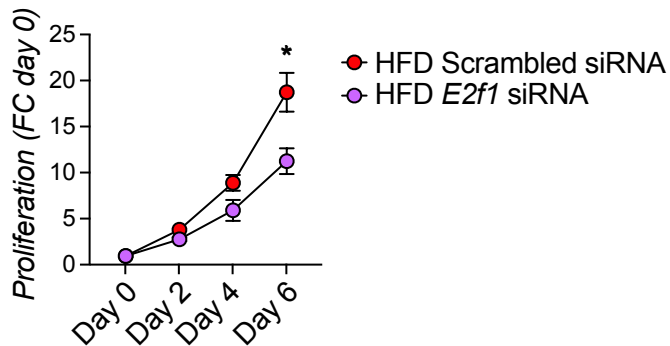

Supplement: supp [file elife-81926-supp-v1.zip]

# Figure S4

**A**

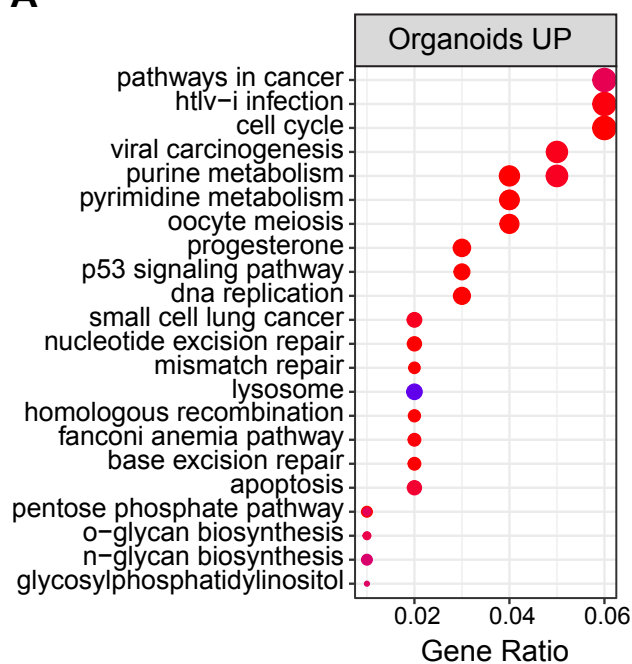

**B**

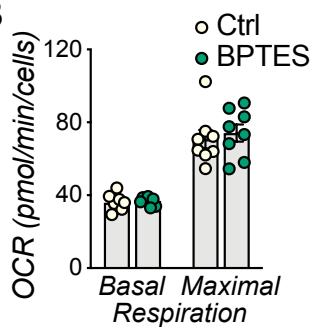

**C**

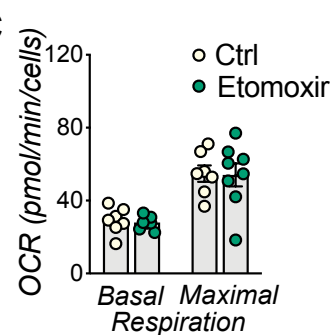

**D**

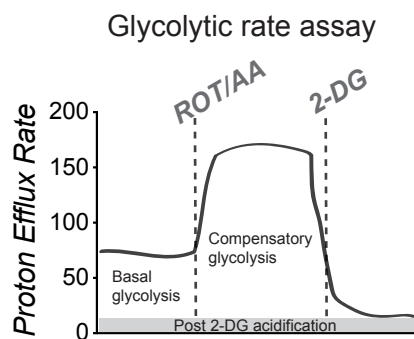

**E**

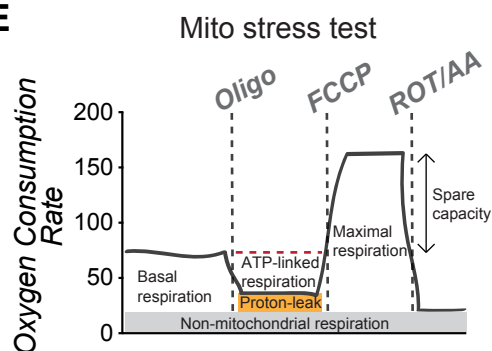

**F**

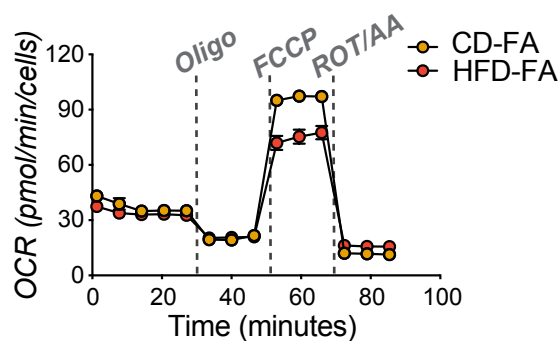

**G**

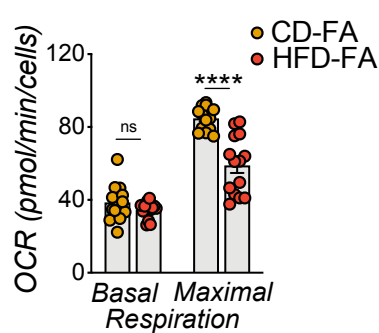

Supplement: supp [file elife-81926-supp-v1.zip]

**Figure S1**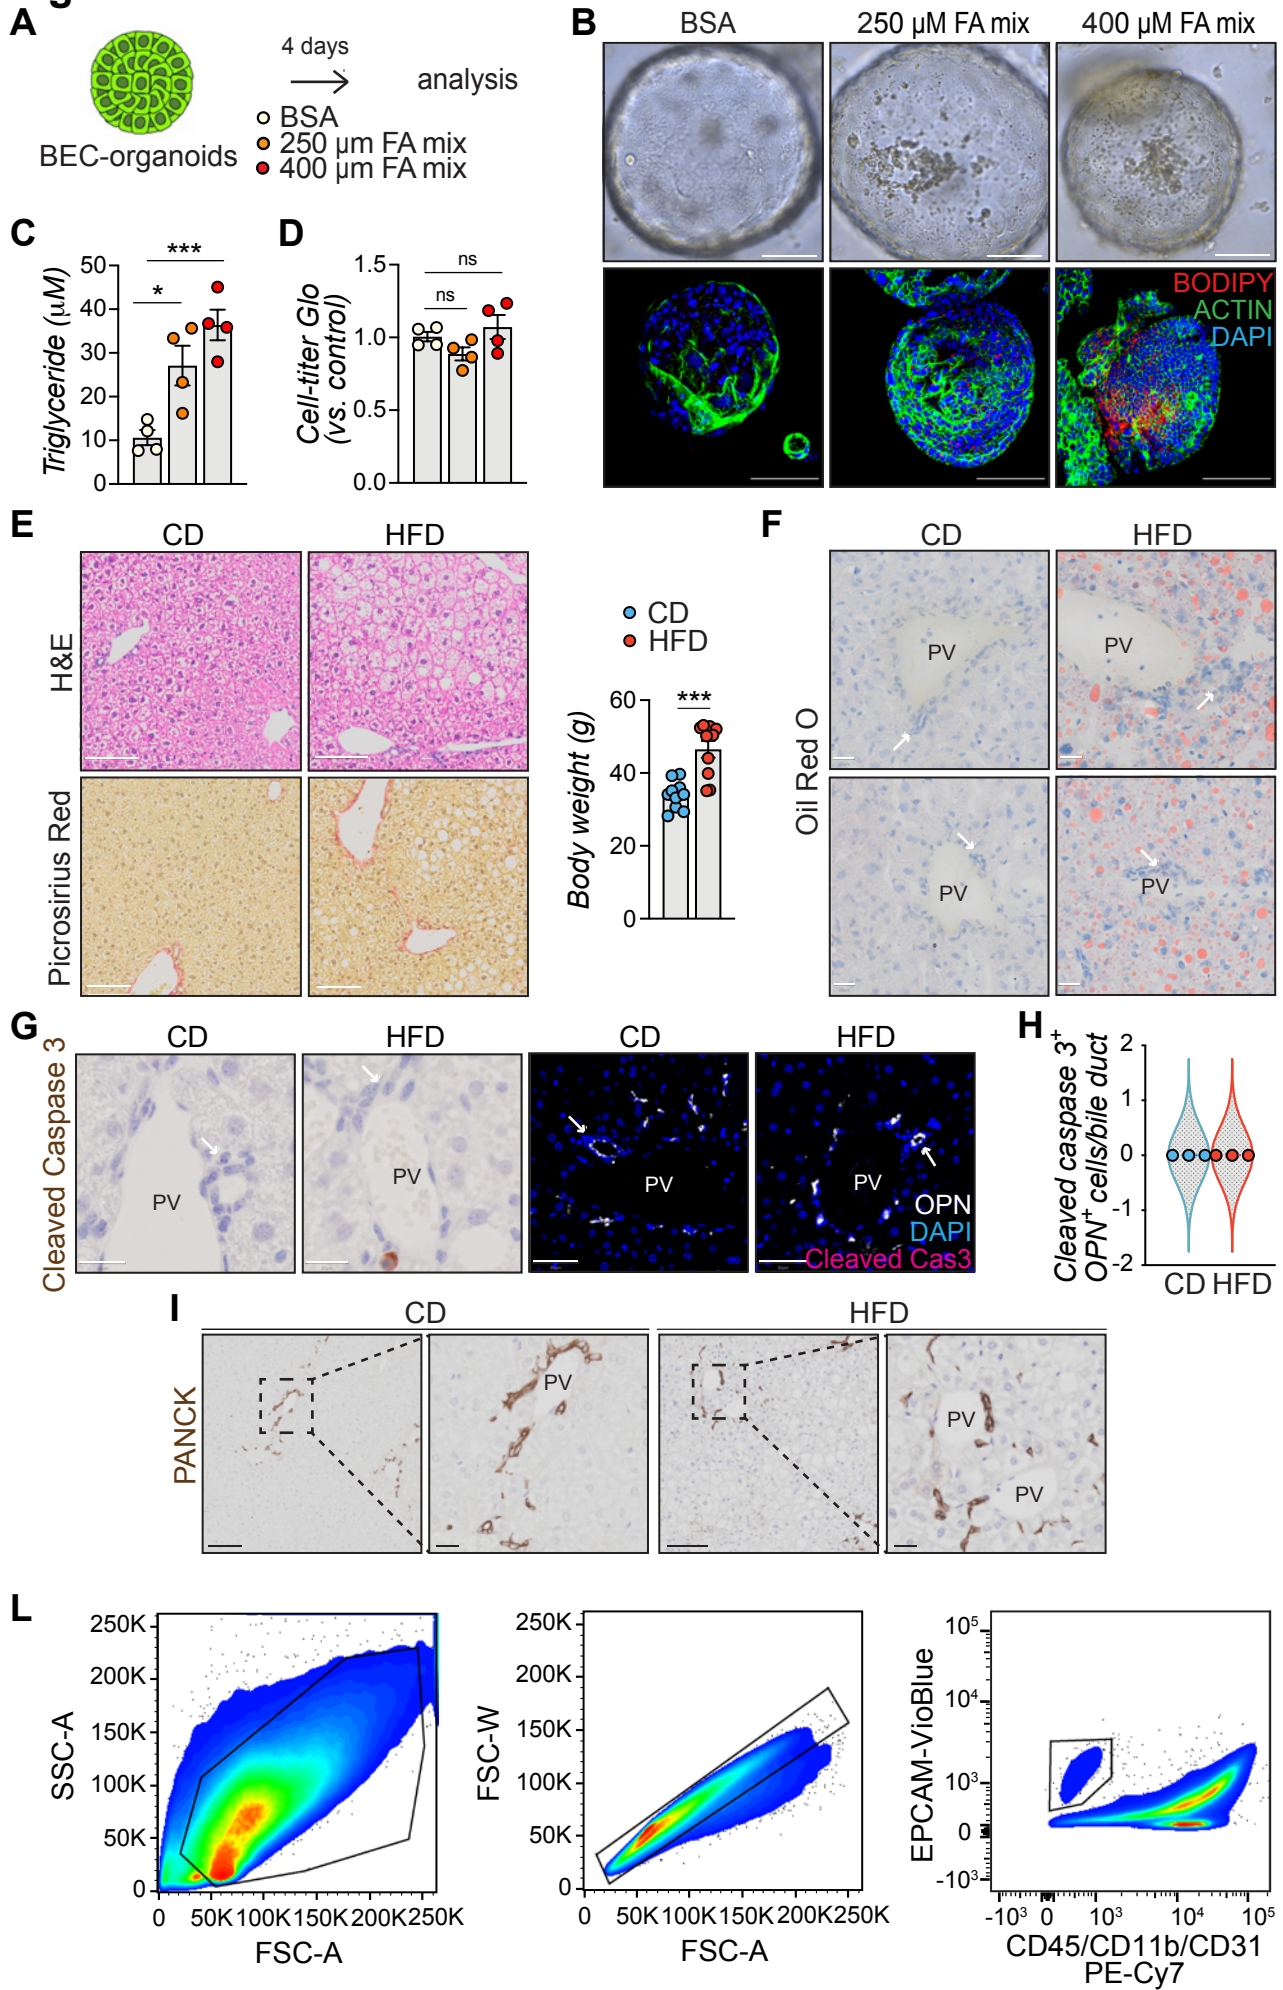

Supplement: supp [file elife-81926-supp-v1.zip]
